# Supplementary material
Source: publisher figshare collection journal article supplement (https://plos.figshare.com/articles/dataset/_/750110)
Supplement: Supplementary file 1 [file 1]

Archive with 24 entries (24 files):
- Figure_S1.pdf
- Figure_S2.pdf
- Figure_S3.pdf
- Figure_S4.pdf
- Figure_S5.pdf
- Figure_S6.pdf
- Figure_S7.pdf
- Figure_S8.pdf
- Figure_S9.pdf
- Figure_S10.pdf
- Figure_S11.pdf
- Figure_S12.pdf
- Figure_S13.pdf
- Table_S1.xlsx
- Table_S2.xlsx
- Table_S3.xlsx
- Table_S4.xlsx
- Table_S5.xlsx
- Table_S6.xls
- Table_S7.xlsx
- Table_S8.xlsx
- Table_S9.xls
- Table_S10.xlsx
- Methods_S1.docx
