# Supplementary material
Source: publisher figshare collection journal article supplement (https://plos.figshare.com/articles/dataset/_/750110)
Supplement: Supplementary file 1 [file 1 › Figure_S2.pdf]

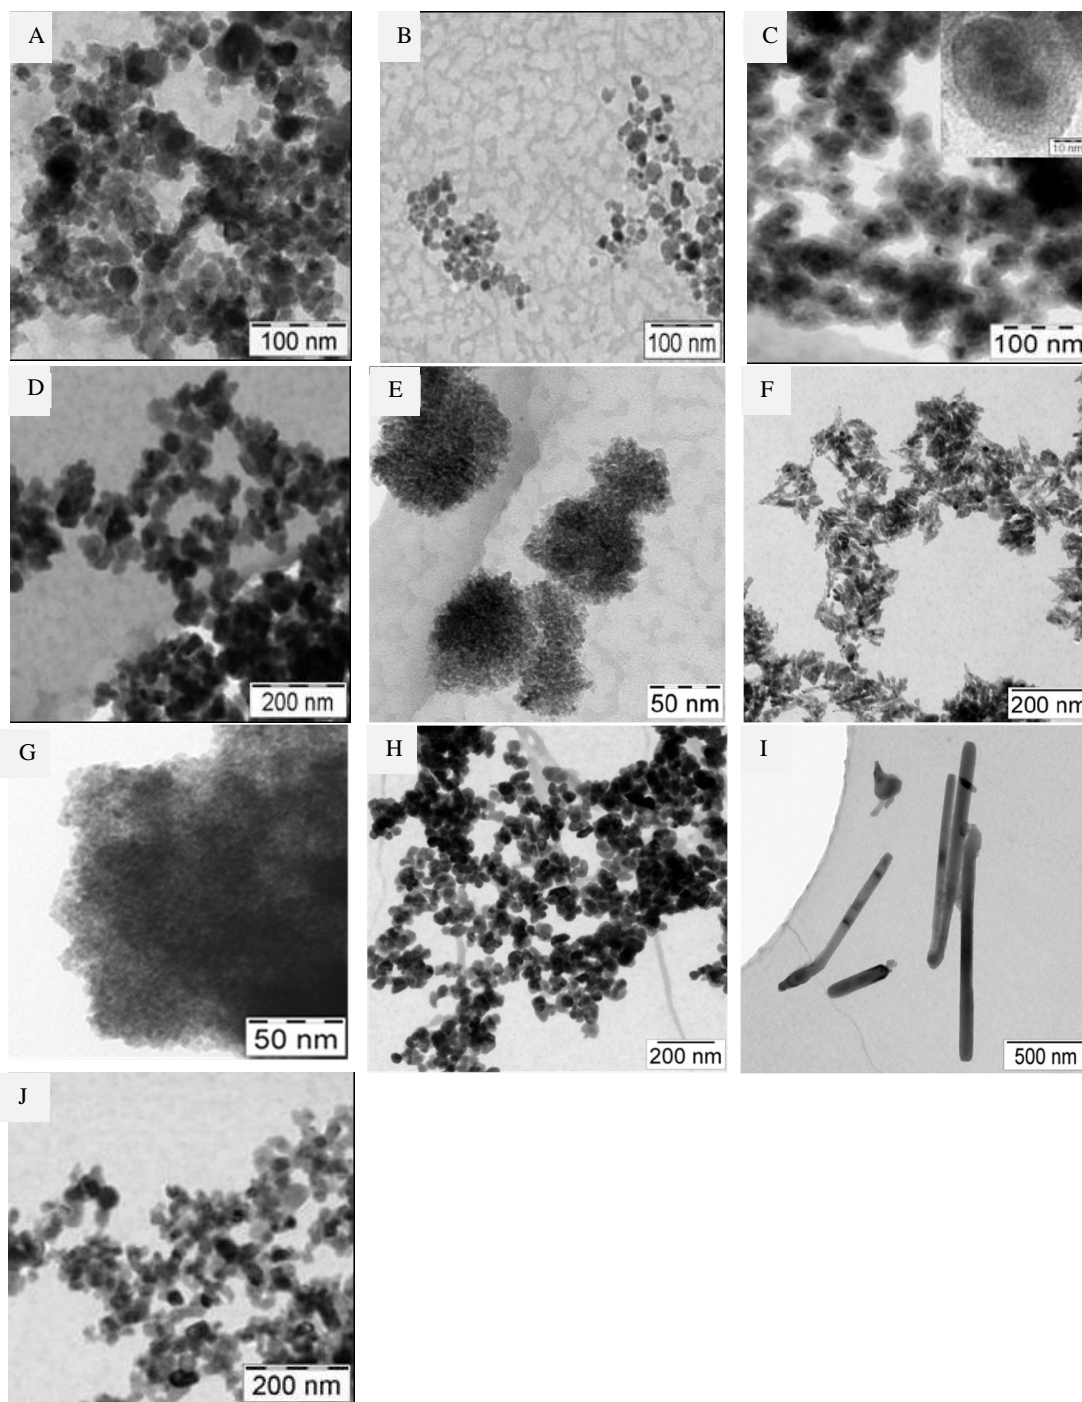

**Figure S2. TEM analysis of ZnO nanoparticles.** TEM micrographs of A) ZnO-1, B) ZnO-2, C) ZnO-3, D) ZnO-4, E) ZnO-5, F) ZnO-6, G) ZnO-7, H) ZnO-8, I) ZnO-9 and J)  $\text{TiO}_2$ .
