# Supplementary material
Source: publisher figshare collection journal article supplement (https://plos.figshare.com/articles/dataset/_/750110)
Supplement: Supplementary file 1 [file 1 › Figure_S3.pdf]

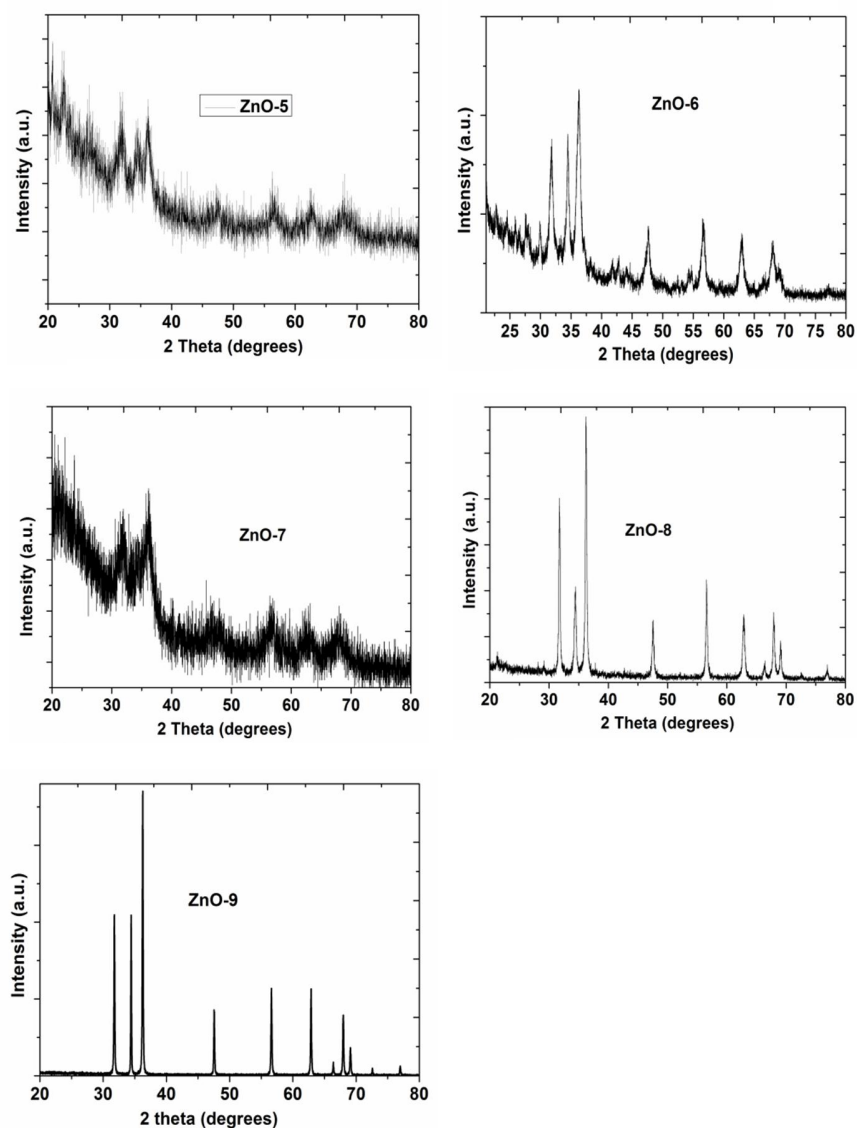

**Figure S3. XRD pattern of ZnO nanoparticles.** XRD spectra for ZnO-5, ZnO-6, ZnO-7, ZnO-8 and ZnO-9. They all reveal the typical peaks of hexagonal wurtzite type crystal structure. XRD results for ZnO-1, ZnO-2, ZnO-3, ZnO-4 and TiO<sub>2</sub> have been presented in Buerki-Thurnherr *et al.* [7].
