# Supplementary material
Source: publisher figshare collection journal article supplement (https://plos.figshare.com/articles/dataset/_/750110)
Supplement: Supplementary file 1 [file 1 › Figure_S5.pdf]

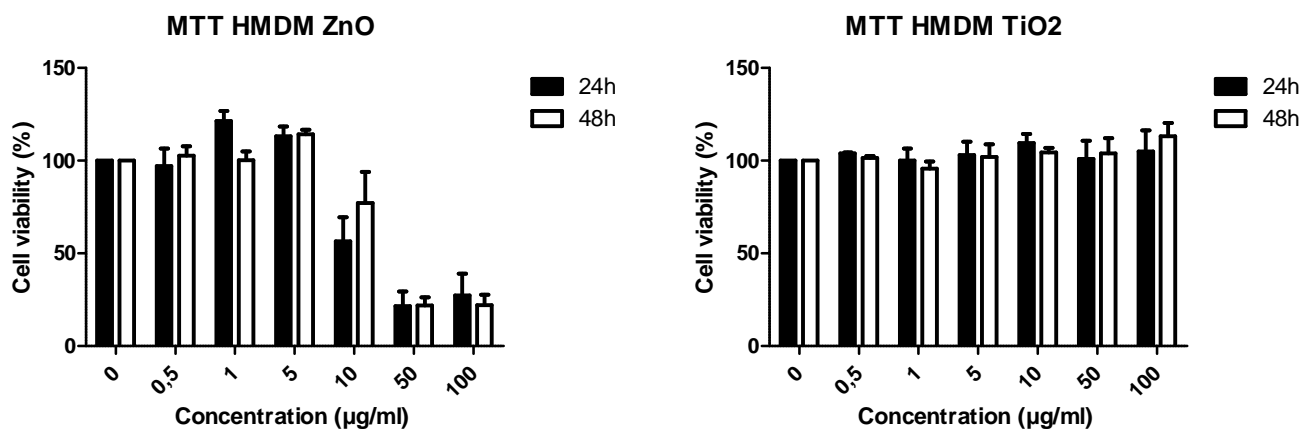

**Figure S5. MTT analysis of HMDM.** Toxicity of ZnO-1 and TiO<sub>2</sub> ENs were assessed with MTT assay. ZnO-1 caused dose-dependent loss of cell viability whereas TiO<sub>2</sub> was inert. The figure shows an average and the standard deviation of three independent cultures. Similar trends in toxicity were obtained using MDCC [23] and the Jurkat cells [7]. The cell viability of HMDM, MDCC and Jurkat cells with 10 µg/ml of ZnO-1 at 24 h timepoint was around 55%, 70%, and 70%, respectively.
