# Supplementary material
Source: publisher figshare collection journal article supplement (https://plos.figshare.com/articles/dataset/_/750110)
Supplement: Supplementary file 1 [file 1 › Figure_S7.pdf]

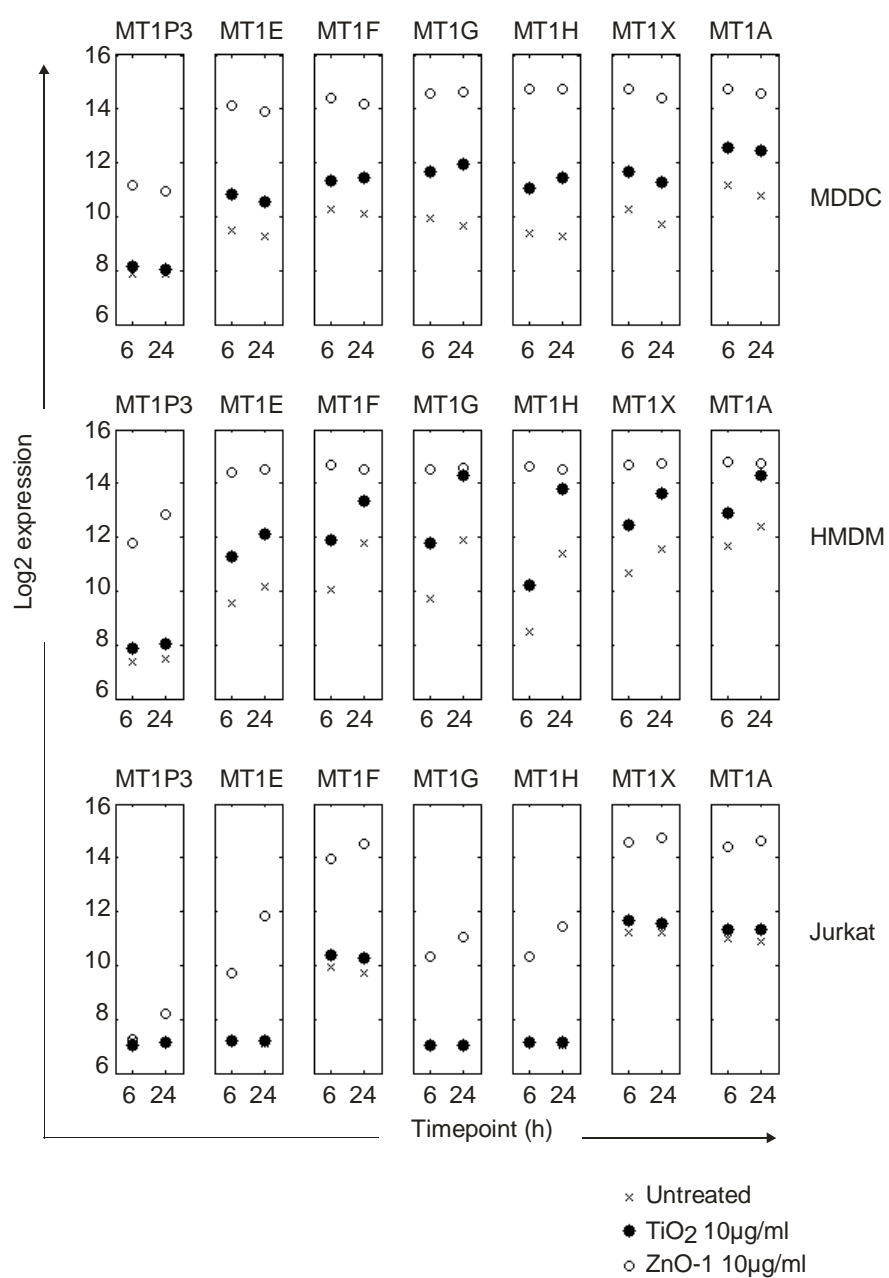

**Figure S7. Expression of the metallothioneins validated with RT-PCR in response to ZnO-1 and TiO<sub>2</sub> nanoparticles.** Figure shows the normalized log<sub>2</sub>-transformed average expression levels in untreated control MDDC, HMDM and Jurkat cells and the expression after exposure of the cells with 10 µg/ml of ZnO-1 or 10 µg/ml of TiO<sub>2</sub> at 6 and 24 h of culture. The data is from three replicate experiments.
