# Supplementary material
Source: publisher figshare collection journal article supplement (https://plos.figshare.com/articles/dataset/_/750110)
Supplement: Supplementary file 1 [file 1 › Figure_S8.pdf]

A

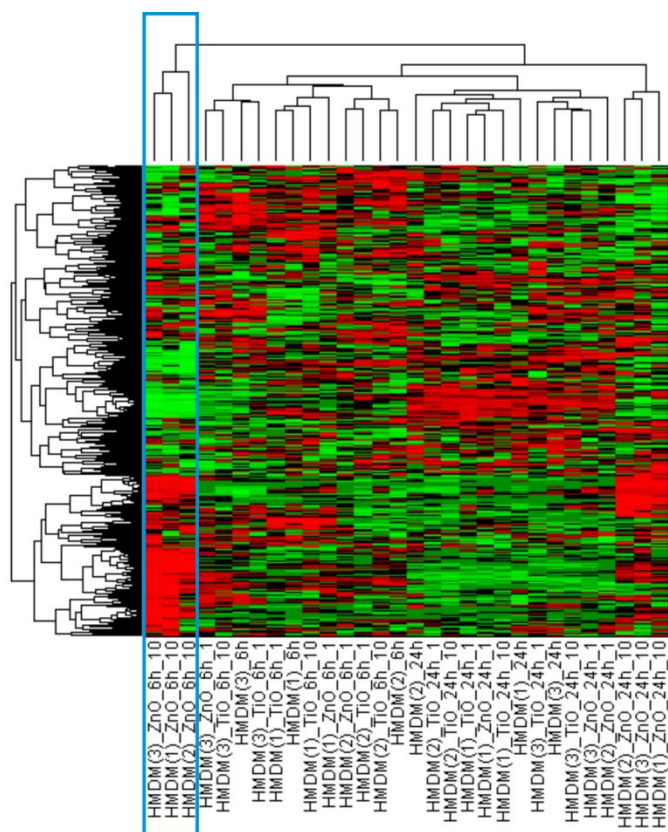

B

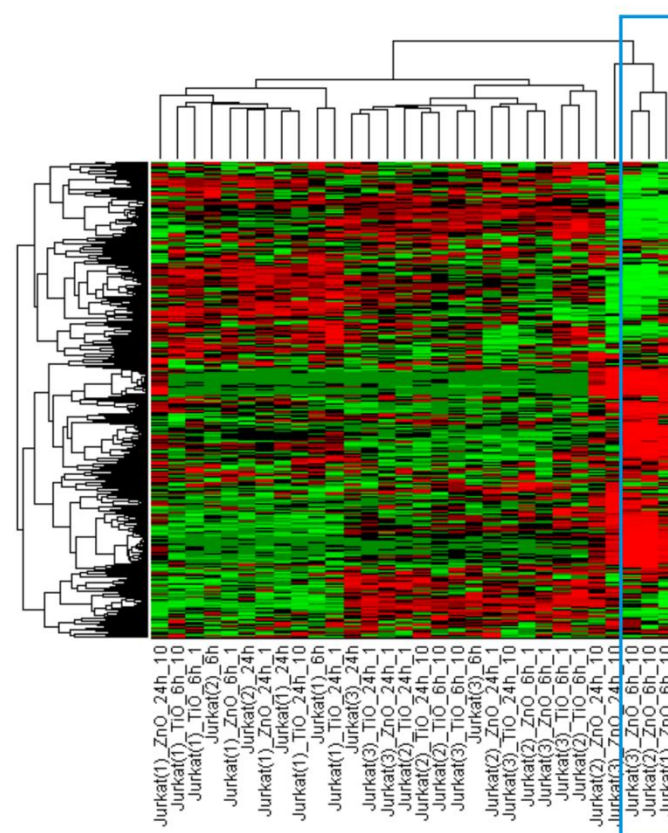

**Figure S8. Hierarchical clustering of the expression of the ZnO responsive genes reported by Moos *et al.* [10] among A) HMDM samples and B) Jurkat samples in Illumina Sentrix HumanHT-12 Expression BeadChip data after exposing the cells with 1 µg/ml or 10 µg/ml of ZnO-1 or TiO<sub>2</sub> for 6 or 24 h in three replicate experiments (see **Figure S4** and **Table S3**). The subclusters discussed in the main text are highlighted. The gene expression data for the differentially expressed genes is shown in **Table S4**.**
