# Supplementary material
Source: publisher figshare collection journal article supplement (https://plos.figshare.com/articles/dataset/_/750110)
Supplement: Supplementary file 1 [file 1 › Figure_S11.pdf]

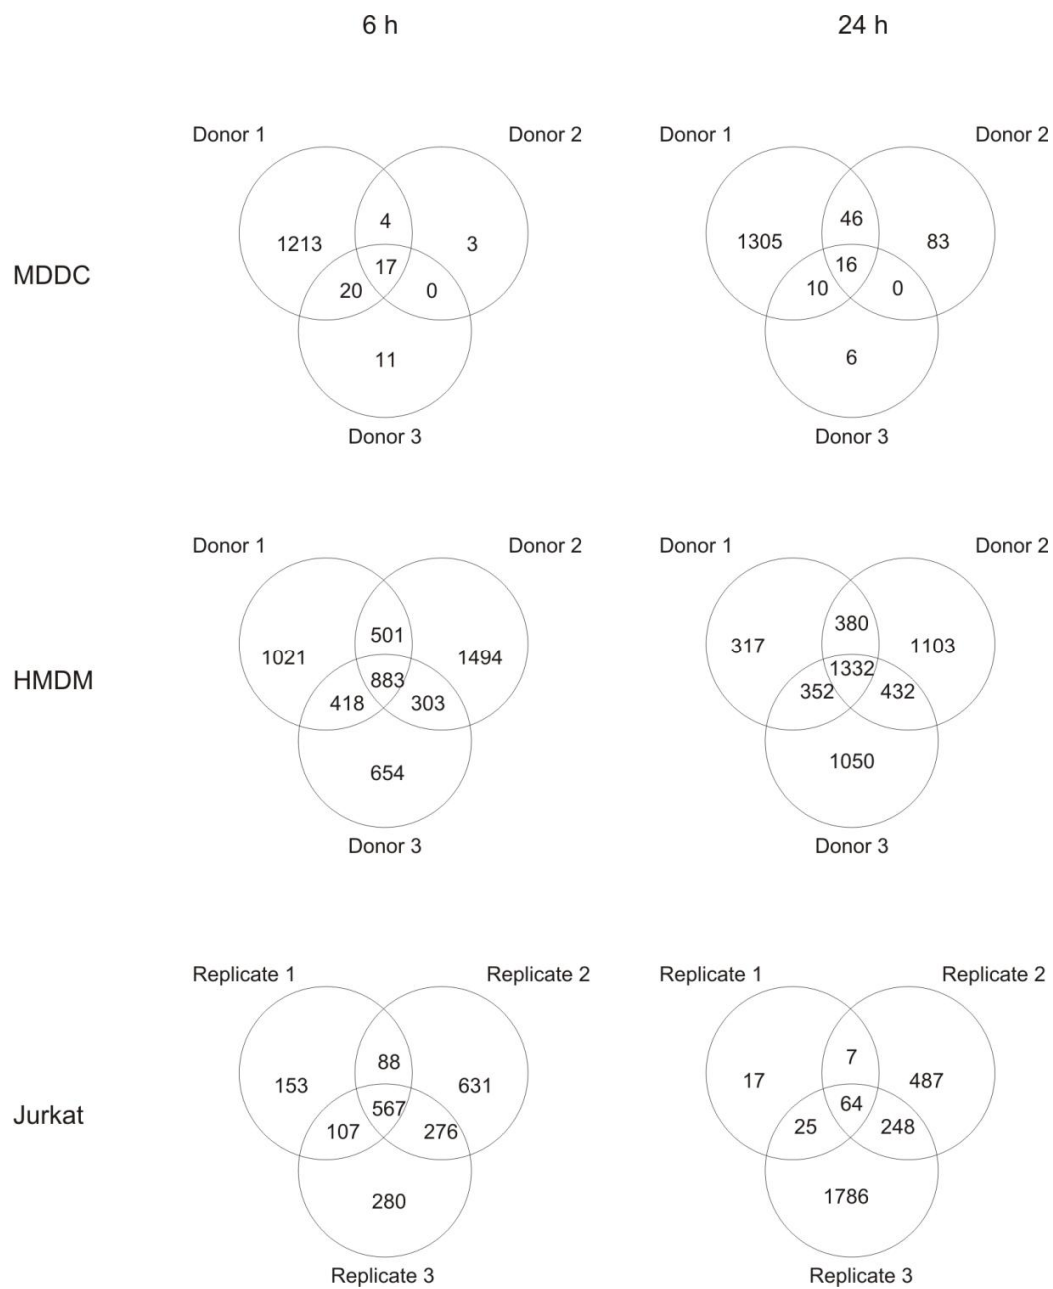

**Figure S11. Donor or replicate culture -specific responses to ZnO-1.** Venn diagrams of the differentially expressed genes in MDDC, HMDM and Jurkat cells ( $FC > 1.5$  or  $< -1.5$ ) in each donor or replicate experiment at 6 h and 24 h timepoints after exposure to 10  $\mu\text{g/ml}$  of ZnO-1 compared to the corresponding untreated control cells analyzed with Illumina Sentrix HumanHT-12 Expression BeadChips.
