# Supplementary material
Source: publisher figshare collection journal article supplement (https://plos.figshare.com/articles/dataset/_/750110)
Supplement: Supplementary file 1 [file 1 › Figure_S12.pdf]

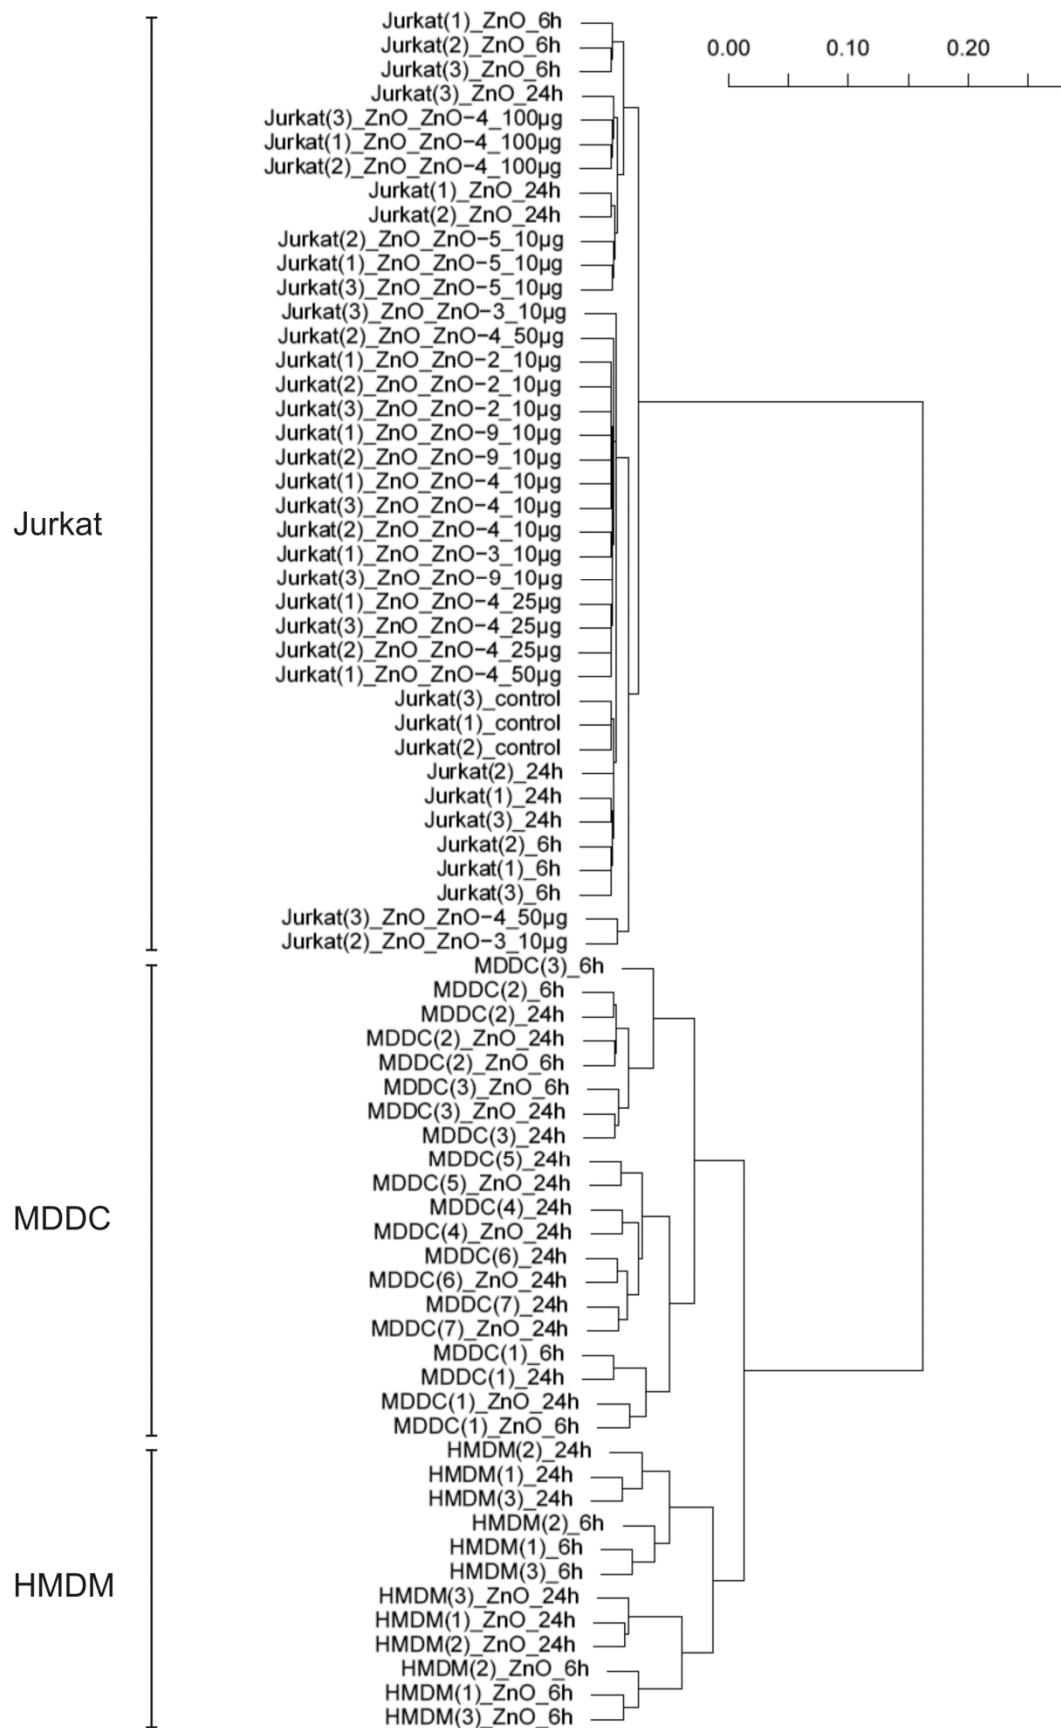

**Figure S12. Hierarchical clustering of the samples analyzed with Affymetrix GeneChip Human Genome U219 array plates.** The data is from three replicate experiments of Jurkat cells exposed with 10 µg/ml of ZnO-2, ZnO-3, ZnO-5 or ZnO-9 for 24 h; or 10 µg/ml, 25 µg/ml, 50 µg/ml or 100 µg/ml of ZnO-4 for 24 h; HMDM, MDDC or Jurkat cells exposed with 10 µg/ml of ZnO-1 for 6 h and 24 h, and 4 replicates experiments of MDDC exposed with 10 µg/ml of ZnO-1 for 24 h (see **Figure S4, Figure S9** and **Table S3**). The clustering was done by using correlation distance with complete linkage.
