# Supplementary material
Source: publisher figshare collection journal article supplement (https://plos.figshare.com/articles/dataset/_/750110)
Supplement: Supplementary file 1 [file 1 › Table_S1.xlsx]

## Sheet: Sheet1
Table S1. XRD, TGA and FT-IR analysis of the ZnO ENs
EN	XRD	TGA (% weight loss)a	FT-IR (cm-1)a
ZnO-5	Wuertzite	12	3429, 2873, 1733, 1588, 1411, 1053, 667
ZnO-6	Wuertzite	44	3300, 1592, 1405, 1005, 520
ZnO-7	Wuertzite	37	3370, 1598, 1428, 520
ZnO-8	Wuertzite	20	3380, 1582, 1410, 480
ZnO-9	Wuertzite	17	3370, 1617, 1563, 475
aXRD, TGA and FT-IR results for ZnO-1, ZnO-2, ZnO-3 and ZnO-4 are presented in Buerki-Thurnherr et al. 2013
