# Supplementary material
Source: publisher figshare collection journal article supplement (https://plos.figshare.com/articles/dataset/_/750110)
Supplement: Supplementary file 1 [file 1 › Table_S2.xlsx]

## Sheet: Sheet1
Table S2. Physicochemical characterization of the nanoparticles
		Immediate measurement			Measurement after 3 h of storage
EN	TEM size (nm)	DLS size (nm) (Water/ Medium)	PDI Index (Water/ Medium)	Zeta Potential (mV) (Water/ Medium)	DLS size (nm) (Water/ Medium)	PDI Index (Water/ Medium)	Zeta Potential (mV) (Water/ Medium)
ZnO-1a	14.7±1.07	159±3 / 153±4	0.15 / 0.12	-23.9±0.2 / -17.3±0.1	158±3 / 153±3	0.16 / 0.13	-24.0±0.1 / -17.2±0.1
ZnO-2	11.7±0.77	312±3 / 287±2	0.10 / 0.12	-9.9±0.2 / -12.3±0.2	314±3 / 288±1	0.09 / 0.09	-9.7±0.2 / -12.2±0.2
ZnO-3	14.6±1.2 (core) 10.9±0.65 (shell)	548±4 / 341±5	0.14 / 0.14	-22.4±0.6 / -23.3±0.4	545±2 / 354±5	0.13 / 0.15	-22.8±0.6 / -23.9±0.4
ZnO-4	7.8±0.88	387±1 / 110±4	0.14 / 0.15	-17.9±0.2 / -12.7±0.4	385±3 / 111.2±4	0.13 / 0.14	-18.1±0.1 / -12.5±0.2
ZnO-5	5.4±0.5	125±4 / 278±3	0.12 / 0.11	19.2±0.2 / 13.6±0.3	125±3 / 279±4	0.14 / 0.12	19.2±0.2 / 13.6±0.3
ZnO-6	13.2±0.6	83±1 / 194±5	0.12 / 0.13	-9.4±0.3 / -11.2±0.1	83±3 / 198±3	0.14 / 0.12	-9.6±0.1 / -11.2±0.1
ZnO-7	4.89±0.54	256±6 / 355±3	0.08 / 0.12	24.3±0.5 / 12.6±0.2	257±3 / 357±1	0.08 / 0.11	24.3±0.5 / 12.6±0.2
ZnO-8	34.5±2.4	576±5 / 331±4	0.11 / 0.13	-5.9±0.4 / -14.1±0.6	576±2 / 330±2	0.12 / 0.11	-5.9±0.4 / -14.1±0.6
ZnO-9	404±8 (length) 40.4±2.6 (diameter)	412±4 / 466±3	0.15 / 0.15	-31.7±0.3 / -15.4±0.5	413±3 / 466±2	0.16 / 0.15	-31.4±0.2 / -15.1±0.3
TiO2b	31.3±3.9	297±2 / 340±3	0.12 / 0.13	-14.3±0.3 / -12.2±0.1	298±1 / 342±3	0.11 / 0.13	-14.4±0.3 / -12.2±0.1
aParticle size by the manufacturer: 10±2 nm
bParticle size by the manufacturer: 21 nm
The data is an average of three measurements and presented with the standard deviations.
