# Supplementary material
Source: publisher figshare collection journal article supplement (https://plos.figshare.com/articles/dataset/_/750110)
Supplement: Supplementary file 1 [file 1 › Table_S3.xlsx]

## Sheet: Samples
Table S3. The samples used in the study
Cell type	Donor/Replicate	EN	Dose (µg/ml)	Time (h)	Illumina	RT-PCR	Affymetrix
MDDC	1	-	-	6	+	-	+
MDDC	1	-	-	24	+	-	+
MDDC	1	TiO2	1	6	+	-	-
MDDC	1	TiO2	1	24	+	-	-
MDDC	1	TiO2	10	6	+	-	-
MDDC	1	TiO2	10	24	+	-	-
MDDC	1	ZnO	1	6	+	-	-
MDDC	1	ZnO	1	24	+	-	-
MDDC	1	ZnO	10	6	+	-	+
MDDC	1	ZnO	10	24	+	-	+
MDDC	2	-	-	6	+	-	+
MDDC	2	-	-	24	+	-	+
MDDC	2	TiO2	1	6	+	-	-
MDDC	2	TiO2	1	24	+	-	-
MDDC	2	TiO2	10	6	+	-	-
MDDC	2	TiO2	10	24	+	-	-
MDDC	2	ZnO-1	1	6	+	-	-
MDDC	2	ZnO-1	1	24	+	-	-
MDDC	2	ZnO-1	10	6	+	-	+
MDDC	2	ZnO-1	10	24	+	-	+
MDDC	3	-	-	6	+	-	+
MDDC	3	-	-	24	+	-	+
MDDC	3	TiO2	1	6	+	-	-
MDDC	3	TiO2	1	24	+	-	-
MDDC	3	TiO2	10	6	+	-	-
MDDC	3	TiO2	10	24	+	-	-
MDDC	3	ZnO-1	1	6	+	-	-
MDDC	3	ZnO-1	1	24	+	-	-
MDDC	3	ZnO-1	10	6	+	-	+
MDDC	3	ZnO-1	10	24	+	-	+
MDDC	4	-	-	24	-	+	-
MDDC	4	ZnO-1	10	24	-	+	-
MDDC	4	ZnO-1	10	24	-	+	-
MDDC	5	-	-	24	-	+	-
MDDC	5	ZnO-1	10	24	-	+	-
MDDC	5	ZnO-1	10	24	-	+	-
MDDC	6	-	-	24	-	+	-
MDDC	6	ZnO-1	10	24	-	+	-
MDDC	6	ZnO-1	10	24	-	+	-
MDDC	7	ZnO-1	-	24	-	-	+
MDDC	7	ZnO-1	10	24	-	-	+
MDDC	8	ZnO-1	-	24	-	-	+
MDDC	8	ZnO-1	10	24	-	-	+
MDDC	9	ZnO-1	-	24	-	-	+
MDDC	9	ZnO-1	10	24	-	-	+
MDDC	10	ZnO-1	-	24	-	-	+
MDDC	10	ZnO-1	10	24	-	-	+
HMDM	1	-	-	6	+	-	+
HMDM	1	-	-	24	+	-	+
HMDM	1	TiO2	1	6	+	-	-
HMDM	1	TiO2	1	24	+	-	-
HMDM	1	TiO2	10	6	+	-	-
HMDM	1	TiO2	10	24	+	-	-
HMDM	1	ZnO	1	6	+	-	-
HMDM	1	ZnO	1	24	+	-	-
HMDM	1	ZnO	10	6	+	-	+
HMDM	1	ZnO	10	24	+	-	+
HMDM	2	-	-	6	+	-	+
HMDM	2	-	-	24	+	-	+
HMDM	2	TiO2	1	6	+	-	-
HMDM	2	TiO2	1	24	+	-	-
HMDM	2	TiO2	10	6	+	-	-
HMDM	2	TiO2	10	24	+	-	-
HMDM	2	ZnO-1	1	6	+	-	-
HMDM	2	ZnO-1	1	24	+	-	-
HMDM	2	ZnO-1	10	6	+	-	+
HMDM	2	ZnO-1	10	24	+	-	+
HMDM	3	-	-	6	+	-	+
HMDM	3	-	-	24	+	-	+
HMDM	3	TiO2	1	6	+	-	-
HMDM	3	TiO2	1	24	+	-	-
HMDM	3	TiO2	10	6	+	-	-
HMDM	3	TiO2	10	24	+	-	-
HMDM	3	ZnO-1	1	6	+	-	-
HMDM	3	ZnO-1	1	24	+	-	-
HMDM	3	ZnO-1	10	6	+	-	+
HMDM	3	ZnO-1	10	24	+	-	+
HMDM	4	-	-	24	-	+	-
HMDM	4	ZnO-1	10	24	-	+	-
HMDM	4	ZnO-1	10	24	-	+	-
HMDM	5	-	-	24	-	+	-
HMDM	5	ZnO-1	10	24	-	+	-
HMDM	5	ZnO-1	10	24	-	+	-
HMDM	6	-	-	24	-	+	-
HMDM	6	ZnO-1	10	24	-	+	-
HMDM	6	ZnO-1	10	24	-	+	-
Jurkat	1	-	-	6	+	-	+
Jurkat	1	-	-	24	+	-	+
Jurkat	1	TiO2	1	6	+	-	-
Jurkat	1	TiO2	1	24	+	-	-
Jurkat	1	TiO2	10	6	+	-	-
Jurkat	1	TiO2	10	24	+	-	-
Jurkat	1	ZnO	1	6	+	-	-
Jurkat	1	ZnO	1	24	+	-	-
Jurkat	1	ZnO	10	6	+	-	+
Jurkat	1	ZnO	10	24	+	-	+
Jurkat	2	-	-	6	+	-	+
Jurkat	2	-	-	24	+	-	+
Jurkat	2	TiO2	1	6	+	-	-
Jurkat	2	TiO2	1	24	+	-	-
Jurkat	2	TiO2	10	6	+	-	-
Jurkat	2	TiO2	10	24	+	-	-
Jurkat	2	ZnO-1	1	6	+	-	-
Jurkat	2	ZnO-1	1	24	+	-	-
Jurkat	2	ZnO-1	10	6	+	-	+
Jurkat	2	ZnO-1	10	24	+	-	+
Jurkat	3	-	-	6	+	-	+
Jurkat	3	-	-	24	+	-	+
Jurkat	3	TiO2	1	6	+	-	-
Jurkat	3	TiO2	1	24	+	-	-
Jurkat	3	TiO2	10	6	+	-	-
Jurkat	3	TiO2	10	24	+	-	-
Jurkat	3	ZnO-1	1	6	+	-	-
Jurkat	3	ZnO-1	1	24	+	-	-
Jurkat	3	ZnO-1	10	6	+	-	+
Jurkat	3	ZnO-1	10	24	+	-	+
Jurkat	4	-	-	24	-	+	-
Jurkat	4	ZnO-1	10	24	-	+	-
Jurkat	4	ZnO-1	10	24	-	+	-
Jurkat	5	-	-	24	-	+	-
Jurkat	5	ZnO-1	10	24	-	+	-
Jurkat	5	ZnO-1	10	24	-	+	-
Jurkat	6	-	-	24	-	+	-
Jurkat	6	ZnO-1	10	24	-	+	-
Jurkat	6	ZnO-1	10	24	-	+	-
Jurkat	7	-	-	-	-	-	+
Jurkat	7	ZnO-2	10	24	-	-	+
Jurkat	7	ZnO-3	10	24	-	-	+
Jurkat	7	ZnO-4	10	24	-	-	+
Jurkat	7	ZnO-4	25	24	-	-	+
Jurkat	7	ZnO-4	50	24	-	-	+
Jurkat	7	ZnO-4	100	24	-	-	+
Jurkat	7	ZnO-5	10	24	-	-	+
Jurkat	7	ZnO-6	10	24	-	-	-
Jurkat	7	ZnO-7	10	24	-	-	-
Jurkat	7	ZnO-8	10	24	-	-	-
Jurkat	7	ZnO-9	10	24	-	-	+
Jurkat	8	-	-	-	-	-	+
Jurkat	8	ZnO-2	10	24	-	-	+
Jurkat	8	ZnO-3	10	24	-	-	+
Jurkat	8	ZnO-4	10	24	-	-	+
Jurkat	8	ZnO-4	25	24	-	-	+
Jurkat	8	ZnO-4	50	24	-	-	+
Jurkat	8	ZnO-4	100	24	-	-	+
Jurkat	8	ZnO-5	10	24	-	-	+
Jurkat	8	ZnO-6	10	24	-	-	-
Jurkat	8	ZnO-7	10	24	-	-	-
Jurkat	8	ZnO-8	10	24	-	-	-
Jurkat	8	ZnO-9	10	24	-	-	+
Jurkat	9	-	-	-	-	-	+
Jurkat	9	ZnO-2	10	24	-	-	+
Jurkat	9	ZnO-3	10	24	-	-	+
Jurkat	9	ZnO-4	10	24	-	-	+
Jurkat	9	ZnO-4	25	24	-	-	+
Jurkat	9	ZnO-4	50	24	-	-	+
Jurkat	9	ZnO-4	100	24	-	-	+
Jurkat	9	ZnO-5	10	24	-	-	+
Jurkat	9	ZnO-6	10	24	-	-	-
Jurkat	9	ZnO-7	10	24	-	-	-
Jurkat	9	ZnO-8	10	24	-	-	-
Jurkat	9	ZnO-9	10	24	-	-	+

## Sheet: Summary
Table S3. Summary of the samples analyzed
Treatment			Cells			Analysis method
nanoparticle	dose (µg/ml)	time (h)	MDDC	HMDC	Jurkat	Illumina	Affymetrix	RT-PCR
TiO2*	1, 10	6, 24	+	+	+	+	+	-
ZnO-1**	1, 10	6, 24	+	+	+	+	+	+
ZnO-2	10	24	-	-	+	-	+	-
ZnO-3	10	24	-	-	+	-	+	-
ZnO-4	10, 25, 50, 100	24	-	-	+	-	+	-
ZnO-5	10	24	-	-	+	-	+	-
ZnO-6	10	24	-	-	+	-	-	-
ZnO-7	10	24	-	-	+	-	-	-
ZnO-8	10	24	-	-	+	-	-	-
ZnO-9	10	24	-	-	+	-	+	-
*Evonik Degussa (Aeroxide® TiO2 p25)
**IBU-tec advanced materials AG
