# Supplementary material
Source: publisher figshare collection journal article supplement (https://plos.figshare.com/articles/dataset/_/750110)
Supplement: Supplementary file 1 [file 1 › Table_S4.xlsx]

## Sheet: MDDC
Table S4. The differentially expressed genes in MDDCs after 10µg/ml ZnO-1 exposure
Cut off: logFC>0.585 (=FC>1.5) and adjP-value <0.05
	6h							24h							Illumina annotation													Ingenuity Pathways Analysis annotation				Affymetrix array 6h			Affymetrix array 24h
Gene	logFC	Avr Expr	t	p	adjP	B	DEG	logFC	Avr Expr	t	p	adjP	B	DEG	PROBE_ID	SYMBOL	TRANSCRIPT	ENTREZ_GENE_ID	GI	ACCESSION	PROTEIN_PRODUCT	ARRAY_ADDRESS_ID	PROBE_TYPE	PROBE_START	PROBE_SEQUENCE	PROBE_CHR_ORIENTATION	PROBE_COORDINATES	Symbol	EntrezGeneName	Location	Type	logFC	adjP	Validation	logFC	adjP	Validation
C20orf127	3.28803	8.54886	5.72075	1.39811e-05	0.0454871	3.01824	1	3.07832	8.54886	5.35588	3.15786e-05	0.118546	2.33233	0	ILMN_1662640	C20orf127	ILMN_15264	140851	50233782	NM_080757.1	NP_542795.1	4480600	S	169	TCTGCAAAGGGGCGTGCAGCTGCTGTGTCTGATGTGGGGACAGCTCTTCT	+	33269618-33269649:33269650-33269667	C20orf127	metallothionein 1 pseudogene 3	unknown	other	-	-	-	-	-	-		1	Validated with Affymetrix arrays: direction of the FC is the same and FC>1.5
ENDOGL1	3.55157	9.31824	12.6918	5.79075e-11	5.652e-07	12.045	1	3.31513	9.31824	11.8468	1.94561e-10	1.35642e-06	11.3085	1	ILMN_1709747	ENDOGL1	ILMN_22280	9941	142381704	NM_005107.2	NP_005098.1	4570008	S	1085	ACTCAAAGCTAAGGAGCAGTCAGGAACCCAGATAAGAAAGCCATCCTAGT	+	38540809-38540857:38540858-38540858	EXOG	endo/exonuclease (5'-3'), endonuclease G-like	Cytoplasm	enzyme	-	-	-	-	-	-		2	Validated with Affymetrix arrays: adj p-value in Affymetrix data <0.05
MED8	-0.735565	8.51524	-6.64451	1.90712e-06	0.00775592	4.66005	1	-0.619927	8.51524	-5.59993	1.82818e-05	0.0743492	2.79306	0	ILMN_2339705	MED8	ILMN_20718	112950	48762701	NM_001001651.1	NP_001001651.1	430523	A	690	TGCAGGAACCTCAGGATTACAGCAGGTGCAGATGGCAGGAGCTCCAAGCC	-	43624286-43624335	MED8 (includes EG:112950)	mediator complex subunit 8	Nucleus	other	-0.380363	0.4338	d	-0.0822552	0.262824	X		0	Affymetrix did not validate the result
MT1A	3.56201	12.0293	9.97182	3.68482e-09	2.24783e-05	9.37726	1	3.79409	12.0293	10.6215	1.27497e-09	7.77765e-06	10.097	1	ILMN_1691156	MT1A	ILMN_1797	4489	71274112	NM_005946.2	NP_005937.2	6200402	S	170	TGCTGCTCCTGCTGCCCCATGAGCTGTGCCAAGTGTGCCCAGGGCTGCAT	+	55231274-55231323	MT1A	metallothionein 1A	Cytoplasm	other	8.3986	0.0146804	2	6.06229	1.39e-06	2		d	Direction of the FC was the same in Affymetrix, but the FC was not larger than 1.5
MT1E	4.68466	10.6045	13.9578	1.05673e-11	1.71902e-07	13.0136	1	4.61452	10.6045	13.7488	1.38694e-11	2.40247e-07	12.8619	1	ILMN_2173611	MT1E	ILMN_2129	4493	83367074	NM_175617.3	NP_783316.2	2070288	S	329	CAAAGGGGCATCGGAGAAGTGCAGCTGCTGTGCCTGATGTGGGAACAGCT	+	55218348-55218384:55218385-55218397	MT1E	metallothionein 1E	Cytoplasm	other	4.65173	0.0071928	2	3.72471	1.14e-07	2		X	Was not a DEG in the timepoint in question
MT1F	4.09868	11.2432	12.0979	1.34794e-10	9.39748e-07	11.5365	1	4.02761	11.2432	11.8882	1.83079e-10	1.35642e-06	11.3463	1	ILMN_1718766	MT1F	ILMN_21370	4494	141803125	NM_005949.2	NP_005940.1	4220672	S	290	CTGCTGCGACTGATGCCAGGACAACCTTTCTCCCAGATGTAAACAGAGAG	+	55250565-55250577:55250578-55250614	MT1F	metallothionein 1F	Cytoplasm	other	-	-	-	-	-	-		-	Gene value was not measured with Affymetrix
MT1G	4.67407	11.1429	12.8987	4.34552e-11	5.30175e-07	12.2137	1	4.96477	11.1429	13.7009	1.47687e-11	2.40247e-07	12.8271	1	ILMN_1715401	MT1G	ILMN_22286	4495	10835229	NM_005950.1	NP_005941.1	1170300	S	252	CGCCTGATGTCGGGACAGCCCTGCTCCCAAGTACAAATAGAGTGACCCGT	-	55258248-55258291:55258292-55258297	MT1G	metallothionein 1G	Cytoplasm	other	5.05834	6.87e-05	2	4.94646	2.15e-11	2
MT1H	5.32615	10.8048	15.7183	1.2129e-12	5.91918e-08	14.1375	1	5.49511	10.8048	16.2169	6.82137e-13	3.32896e-08	14.4136	1	ILMN_2124802	MT1H	ILMN_23074	4496	124244058	NM_005951.2	NP_005942.1	130093	S	34	CTTCTCGCTTGGGAACTCCAGTCTCACCTCGGCTTGCAATGGACCCCAAC	+	55261260-55261297:55261298-55261309	MT1H	metallothionein 1H	Cytoplasm	other	-	-	-	-	-	-			83% of the genes that were DEGs in 6h were validated with Affymetrix (criterium 1), and all of them also with adjusted p-values (criterium 2)
MT1H	2.40366	8.25484	5.14873	5.04585e-05	0.120867	1.93503	0	2.8352	8.25484	6.07311	6.45774e-06	0.02865	3.66071	1	ILMN_1683923	MT1H	ILMN_23074	4496	10835084	NM_005951.1	NP_005942.1	1580561	S	214	GGGACAGCCCTGCTGTCAGATGAAAACAGAATGACACGTAAAATCCGAGG	+	55262407-55262456	MT1H	metallothionein 1H	Cytoplasm	other	-	-	-	-	-	-			100% of the genes that were DEGs in 24h were validated with Affymetrix (criterium 1), and all of them also with adjusted p-values (criterium 2)
MT1M	6.04431	9.05133	14.754	3.86454e-12	9.42986e-08	13.5511	1	5.10771	9.05133	12.4678	7.93432e-11	7.74421e-07	11.856	1	ILMN_1657435	MT1M	ILMN_25245	4499	121582464	NM_176870.2	NP_789846.1	1400634	S	40	CACGCCGTCCGGGTGGGCCTAGCAGTCGCTCCATTTATCGCTTGAGATCT	+	55224074-55224123	MT1M	metallothionein 1M	unknown	other	8.86815	0.000175809	2	7.4726	8.15e-10	2
MT1X	4.43579	11.2375	12.172	1.21098e-10	9.39748e-07	11.602	1	4.6816	11.2375	12.8465	4.67002e-11	5.69765e-07	12.1699	1	ILMN_1775170	MT1X	ILMN_16629	4501	31543213	NM_005952.2	NP_005943.1	6620528	S	2	CTGTCCCGCTGCGTGTTTTCCTCTTGATCGGGAACTCCTGCTTCTCCTTG	+	55273897-55273946	MT1X	metallothionein 1X	unknown	other	-	-	-	-	-	-
MT2A	3.28259	12.4496	9.47541	8.56441e-09	4.644e-05	8.78614	1	3.44049	12.4496	9.93119	3.94392e-09	2.13857e-05	9.32911	1	ILMN_1686664	MT2A	ILMN_11198	4502	31543214	NM_005953.2	NP_005944.1	450615	S	10	GAACCCGCGTGCAACCTGTCCCGACTCTAGCCGCCTCTTCAGCACGCCAT	+	55200021-55200068:55200069-55200070	MT2A	metallothionein 2A	Cytoplasm	other	2.01505	0.0104179	2	2.11589	8.18e-09	2
MTE	4.47682	9.02209	8.20993	8.42874e-08	0.000411339	7.10768	1	4.10489	9.02209	7.52787	3.15068e-07	0.00153759	6.0928	1	ILMN_2136089	MTE	ILMN_172876	644314	116325990	NM_175621.2	NP_783320.2	2760537	S	187	CCGTGGGCTGTGCCAAGTGTGCCCAGGGATGTGTTTGCAAAGGGACATCT							-	-	-	-	-	-

## Sheet: HMDM
Table S4. The differentially expressed genes in HMDM cells after 10µg/ml ZnO-1 exposure
Cut off: logFC>0.585 (=FC>1.5) and adjP-value <0.05
	6h							24h							Illumina annotation													Ingenuity Pathways Analysis annotation							Affymetrix validation 6h			Affymetrix validation 24h
Gene	logFC	Avr Expr	t	p	adjP	B	DEG	logFC	Avr Expr	t	p	adjP	B	DEG	PROBE_ID	SYMBOL	TRANSCRIPT	ENTREZ_GENE_ID	GI	ACCESSION	PROTEIN_PRODUCT	ARRAY_ADDRESS_ID	PROBE_TYPE	PROBE_START	PROBE_SEQUENCE	PROBE_CHR_ORIENTATION	PROBE_COORDINATES	MYC_target	T53_target	NR3C1_target	Symbol (IPA)	EntrezGeneName (IPA)	Location (IPA)	Type (IPA)	logFC	adjP	Validation	logFC	adjP	Validation
ADCK2	-0.668561	10.268	-3.53559	0.00202071	0.0291674	-1.83385	1	0.0122678	10.268	0.0648763	0.948902	0.989667	-7.06677	0	ILMN_1663132	ADCK2	ILMN_10783	90956	41393591	NM_052853.3	NP_443085.2	1780647	S	2165	GTAACCCTCCAGTGGTGGAAGGCACACCATGGCTTCCTCTGCTTGGTTTG	+	140041178-140041227	0	0	0	ADCK2	aarF domain containing kinase 2	Cytoplasm	kinase	-0.314246	0.422738	d	-0.247133	0.553621	X	1	Validated with Affymetrix arrays: direction of the FC is the same and FC>1.5
AGRN	1.31529	8.48004	3.92044	0.000817511	0.0146893	-0.953477	1	0.730821	8.48004	2.17834	0.0412322	0.24724	-4.84856	0	ILMN_1770454	AGRN	ILMN_29539	375790	54873612	NM_198576.2	NP_940978.2	6370500	S	7023	CCTCCCCACAGCGTCAGTGAAAGTCGTCCTTGTCTCAGAATGACCAGGGG	+	981059-981108	0	0	0	AGRN	agrin	Plasma Membrane	other	0.174999	0.692778	d	-0.0362562	0.94566	X	2	Validated with Affymetrix arrays: adj p-value in Affymetrix data <0.05
AURKAIP1	-0.695294	10.9621	-4.18595	0.00043657	0.00900486	-0.338984	1	0.0835772	10.9621	0.503169	0.620218	0.892708	-6.93795	0	ILMN_1768396	AURKAIP1	ILMN_28786	54998	8923564	NM_017900.1	NP_060370.1	5810088	S	700	CGCCCGTTGCTGCTGTGATCCGTAGTAATAAATTCTCAGAGGACTCAGCC	-	1298975-1299024	0	0	0	AURKAIP1	aurora kinase A interacting protein 1	Nucleus	enzyme	-0.202681	0.302345	d	-0.0244118	0.928463	X	0	Affymetrix did not validate the result
BAIAP2L1	0.789781	7.14345	4.76979	0.000110307	0.00300235	1.01714	1	0.0501599	7.14345	0.302935	0.764997	0.941992	-7.02129	0	ILMN_1703593	BAIAP2L1	ILMN_16050	55971	34222363	NM_018842.3	NP_061330.2	5700343	S	1818	TCTGCCACGTGCTGACGGTCGGGAAGCTTCAGTGGAGAGGCCTAACTCTA	-	97760653-97760702	0	0	0	BAIAP2L1	BAI1-associated protein 2-like 1	Cytoplasm	other	0.708067	0.0865592	1	-0.0431919	0.940006	X	d	Direction of the FC was the same in Affymetrix, but the FC was not larger than 1.5
BIRC2	0.591699	8.44048	3.35588	0.00307163	0.0401989	-2.23818	1	0.112208	8.44048	0.636401	0.531569	0.854957	-6.86015	0	ILMN_1768194	BIRC2	ILMN_23760	329	41349435	NM_001166.3	NP_001157.1	4920707	S	2037	GACCTGGAGATAGGGTAGCCTGCTTTGCCTGTGGTGGGAAGCTCAGTAAC	+	101726433-101726482	0	0	1	BIRC2	baculoviral IAP repeat containing 2	Cytoplasm	enzyme	0.309662	0.207506	d	-0.0124595	0.971359	X	X	Was not a DEG in the timepoint in question
BSDC1	0.631069	9.70123	5.38958	2.61754e-05	0.000977362	2.44342	1	-0.00563251	9.70123	-0.0481039	0.9621	0.992273	-7.06776	0	ILMN_1734483	BSDC1	ILMN_19084	55108	141802627	NM_018045.5	NP_060515.2	3370450	S	4298	CCAATGAGTGAAAGGGATCGTGGGTCAGGGACACCGAGAGAGTGAGGTCA	-	32603610-32603659	0	0	0	BSDC1	BSD domain containing 1	unknown	other	0.31055	0.147988	d	0.0640364	0.812598	X	-	Gene value was not measured with Affymetrix
C16orf53	-0.691963	8.43884	-7.97146	1.04692e-07	1.28695e-05	7.93577	1	-0.266134	8.43884	-3.06588	0.0059868	0.0611998	-3.04745	0	ILMN_2194828	C16orf53	ILMN_20272	79447	39725648	NM_024516.2	NP_078792.1	2340059	S	882	ACCTCAAGCTCCCAAACAGCACGTTGCGGGAAAGAGGAAGAGAGAGTGTG	+	29738678-29738727	0	0	0	C16orf53	chromosome 16 open reading frame 53	Nucleus	other	-0.325304	0.231463	d	0.0328199	0.932137	X
C17orf70	-0.838694	10.3994	-3.67762	0.00144845	0.0228687	-1.51089	1	-0.432143	10.3994	-1.89492	0.0723195	0.351143	-5.34735	0	ILMN_1711823	C17orf70	ILMN_178717	80233	52851424	NM_025161.3	NP_079437.3	4540064	S	3750	CGATGAGTGCGGGTAGGAGCCGTGAGGTGCTTCTCTGCTGTGACAAACGA	-	77117408-77117457	0	0	0	C17orf70	chromosome 17 open reading frame 70	Nucleus	other	-0.260853	0.203775	d	0.138974	0.537389	X		83.3% of the genes that were DEGs in 6h were validated with Affymetrix (criterium 1), and 78.6% also with adjusted p-values (criterium 2)
C17orf90	-0.709219	10.3032	-4.8781	8.56083e-05	0.00246481	1.268	1	-0.0782672	10.3032	-0.538333	0.596155	0.883212	-6.91913	0	ILMN_2043615	C17orf90	ILMN_32693	339229	89886351	NM_001039842.1	NP_001034931.1	940300	S	516	CCTTCACACCCCCTCACAGACTCCTTGTGTCCAACGGGAATAGGAAGAAT	-	77242525-77242574	0	0	0	C17orf90	chromosome 17 open reading frame 90	Cytoplasm	other	-0.348258	0.130847	d	0.100971	0.709309	X		86.0% of the genes that were DEGs in 24h were validated with Affymetrix (criterium 1), and 83.4 % also with adjusted p-values (criterium 2)
CCDC56	-0.644158	10.3615	-5.0337	5.95634e-05	0.00187579	1.62738	1	-0.21816	10.3615	-1.70479	0.103369	0.428685	-5.65458	0	ILMN_2064898	CCDC56	ILMN_167546	28958	94536770	NM_001040431.1	NP_001035521.1	1850468	S	630	CCCCTTCACCTTCCAGGGACGCAGTTGTTACGAGGTTAGACGTGGCAGCT	-	38203251-38203300	0	0	0	CCDC56	coiled-coil domain containing 56	Cytoplasm	other	-0.298752	0.109698	d	0.0659845	0.770765	X
CD83	1.07463	10.0666	3.73877	0.00125448	0.0204684	-1.37107	1	-0.0607983	10.0666	-0.211526	0.834569	0.961726	-7.04569	0	ILMN_2328666	CD83	ILMN_181889	9308	94420687	NM_004233.3	NP_004224.1	6620026	A	1628	TGGGTGCTCGCCCACTTGTCCCACTATCTGGGTGCATGATCTTGAGCAAG	+	14244278-14244327	0	0	0	CD83	CD83 molecule	Plasma Membrane	other	1.07489	0.0728574	1	0.11981	0.875745	X
CSF1R	-0.753015	13.9227	-4.72521	0.000122462	0.00326044	0.913771	1	0.124399	13.9227	0.78061	0.443968	0.811941	-6.75633	0	ILMN_1686623	CSF1R	ILMN_24980	1436	27262658	NM_005211.2	NP_005202.2	1070014	S	3881	GGCCACACCAAGCAGGAAGCACAAACTCCCCCAAGCTGACTCATCCTAAC	-	149413105-149413154	0	0	0	CSF1R	colony stimulating factor 1 receptor	Plasma Membrane	kinase	-0.340887	0.271681	d	-0.0472845	0.907833	X
CTNNB1	0.743522	8.87233	3.67788	0.00144757	0.0228625	-1.5103	1	0.288082	8.87233	1.42502	0.169226	0.548522	-6.06116	0	ILMN_1757350	CTNNB1	ILMN_307737	1499	148233337	NM_001098209.1	NP_001091679.1	3800671	A	2109	CTGCAGGGGTCCTCTGTGAACTTGCTCAGGACAAGGAAGCTGCAGAAGCT	+	41252881-41252930	0	1	0	CTNNB1	catenin (cadherin-associated protein), beta 1, 88kDa	Nucleus	transcription regulator	0.236259	0.269102	d	-0.269192	0.209063	X
CTNNB1	0.863998	8.92369	3.78341	0.00112934	0.0188296	-1.26875	1	0.235769	8.92369	1.03242	0.313922	0.718609	-6.52801	0	ILMN_1746396	CTNNB1	ILMN_307737	1499	148233337	NM_001098209.1	NP_001091679.1	4260379	A	2107	AGCTGCAGGGGTCCTCTGTGAACTTGCTCAGGACAAGGAAGCTGCAGAAG	+	41252879-41252928	0	0	0	CTNNB1	catenin (cadherin-associated protein), beta 1, 88kDa	Nucleus	transcription regulator	0.236259	0.269102	d	-0.269192	0.209063	X
CYB5D1	0.622031	8.07212	6.10725	5.18563e-06	0.000271243	4.05385	1	-0.1152	8.07212	-1.13106	0.271111	0.678702	-6.42296	0	ILMN_1670925	CYB5D1	ILMN_26624	124637	142350395	NM_144607.3	NP_653208.2	6420040	S	3172	CATGTCTTGCCTCAGACCCTCACACACTGTCCTCTCTGCCTGCAACACTC	+	7706000-7706049	0	0	0	CYB5D1	cytochrome b5 domain containing 1	unknown	other	0.227173	0.235684	d	0.0419028	0.864095	X
DCP1A	0.743173	8.68933	7.78556	1.51316e-07	1.7294e-05	7.57021	1	-0.000140043	8.68933	-0.00146711	0.998844	0.999727	-7.06896	0	ILMN_1809285	DCP1A	ILMN_27256	55802	150418000	NM_018403.4	NP_060873.3	1450370	S	1649	GGAAAGCCAGCTCCCCTTCTCCTCTAACTATTGGAACGCCAGAAAGTCAG	-	53297185-53297234	0	0	0	DCP1A	DCP1 decapping enzyme homolog A (S. cerevisiae)	Nucleus	other	0.375056	0.108549	d	0.233258	0.334398	X
EIF2AK2	-1.04239	9.84834	-3.2563	0.00386785	0.0481472	-2.45973	1	0.0116412	9.84834	0.0363656	0.971343	0.994034	-7.06828	0	ILMN_1706502	EIF2AK2	ILMN_168435	5610	4506102	NM_002759.1	NP_002750.1	2120079	S	2728	CGTTCTCTGCCTCACATAGCTTACAAGCCAGCTGGAGAAATATGGTACTC	-	37187233-37187282	0	0	0	EIF2AK2	eukaryotic translation initiation factor 2-alpha kinase 2	Cytoplasm	kinase	-1.04757	0.121481	1	-0.327127	0.676535	X
FKBP1A	0.754716	8.66774	3.81041	0.00105972	0.0178888	-1.20674	1	-0.124851	8.66774	-0.63035	0.535442	0.856775	-6.86406	0	ILMN_1683969	FKBP1A	ILMN_29213	2280	17149835	NM_054014.1	NP_463460.1	630010	A	276	GAGGCTGGGAAGAAGGGGTTGCCCAGATGAGTGTGGGTCAGAGAGCCAAA	-	1300860-1300884:1304135-1304159	0	0	0	FKBP1A	FK506 binding protein 1A, 12kDa	Cytoplasm	enzyme	0.172449	0.51461	d	0.269206	0.289975	X
FKBP1A	0.770854	8.78859	3.54387	0.00198194	0.0287437	-1.81509	1	-0.17883	8.78859	-0.822141	0.420473	0.799312	-6.72274	0	ILMN_2333367	FKBP1A	ILMN_29213	2280	17149835	NM_054014.1	NP_463460.1	1940504	A	410	GAGCTTCTAAAACTGGAATGACAGGAATGGCCTCCTCCCTTAGCTCCCTG	-	1300726-1300755:1300756-1300775	0	0	0	FKBP1A	FK506 binding protein 1A, 12kDa	Cytoplasm	enzyme	0.172449	0.51461	d	0.269206	0.289975	X
FOSB	2.3261	7.84977	5.53908	1.85962e-05	0.0007451	2.78317	1	0.084363	7.84977	0.200892	0.842766	0.964645	-7.04797	0	ILMN_1751607	FOSB	ILMN_13603	2354	5803016	NM_006732.1	NP_006723.1	7160239	S	3716	TGGGCCGTCCCCTCTCCCCTTGGTTCTGCACTGTTGCCAATAAAAAGCTC	+	50670217-50670266	0	0	0	FOSB	FBJ murine osteosarcoma viral oncogene homolog B	Nucleus	transcription regulator	0.423171	0.27185	d	-0.0940186	0.846923	X
FOSL1	0.797318	7.30512	8.47275	3.9669e-08	5.93842e-06	8.89736	1	0.0637357	7.30512	0.677292	0.505806	0.844544	-6.83276	0	ILMN_1771841	FOSL1	ILMN_167733	8061	34734076	NM_005438.2	NP_005429.1	6960332	S	1332	CACTGCCACACTCTCCATCACCCTCTTCCTGTGATCCACCCAACCCTATC	-	65416554-65416603	0	1	0	FOSL1	FOS-like antigen 1	Nucleus	transcription regulator	0.336834	0.0655079	d	-0.0451281	0.843742	X
GPR132	0.796565	8.66944	4.17187	0.000451349	0.00922779	-0.371668	1	-0.0324666	8.66944	-0.170038	0.86665	0.971985	-7.05392	0	ILMN_1811171	GPR132	ILMN_19860	29933	30181231	NM_013345.2	NP_037477.1	5870692	S	3160	GGGCTGAGCCACGCTCTCGTTTTGTCAGGCAGCTATGCAGTTGCTCTTCC	-	104587208-104587257	0	0	0	GPR132	G protein-coupled receptor 132	Plasma Membrane	G-protein coupled receptor	0.456327	0.0543572	d	0.144933	0.575085	X
HSPE1	0.9841	10.5014	4.06303	0.000583748	0.0112557	-0.623933	1	-0.320738	10.5014	-1.32422	0.200029	0.5946	-6.19315	0	ILMN_1803775	HSPE1	ILMN_2612	3336	4504522	NM_002157.1	NP_002148.1	2680170	S	12	GCAGAGTACGAGTCTGAGGCGGAGGGAGTAATGGCAGGACAAGCGTTTAG	+	198073376-198073405:198073406-198073408:198074043-198074059	0	0	0	HSPE1	heat shock 10kDa protein 1 (chaperonin 10)	Cytoplasm	enzyme	0.0754707	0.856912	d	0.589632	0.0833929	X
LRSAM1	-0.773247	9.62028	-5.05722	5.63943e-05	0.0017879	1.68158	1	-0.6137	9.62028	-4.01374	0.000655845	0.0104227	-0.896905	1	ILMN_1811102	LRSAM1	ILMN_21244	90678	53729358	NM_138361.3	NP_612370.3	3190437	A	3072	CCTGCTCTCCACAACTGTCCCTCCTTACCCCATGTAGCTCGATCCGAAGC	+	129305520-129305569	0	0	0	LRSAM1	leucine rich repeat and sterile alpha motif containing 1	Cytoplasm	enzyme	-0.383117	0.414256	d	0.134659	0.812307	0
NEU4	0.834146	7.28486	6.3512	3.03234e-06	0.000182923	4.58809	1	-0.0453416	7.28486	-0.345231	0.733444	0.932769	-7.00708	0	ILMN_2219683	NEU4	ILMN_25645	129807	18152772	NM_080741.1	NP_542779.2	780224	S	2222	GCAGGTAGCCCAGGGTGTTGTGGGTGGCAGCACTTGTTTACTGGCTGCTT	+	242407327-242407376	0	0	0	NEU4	sialidase 4	Cytoplasm	enzyme	0.101944	0.82937	d	0.177146	0.694962	X
NUB1	-0.694234	10.5044	-8.09815	8.16655e-08	1.05996e-05	8.18211	1	-0.251123	10.5044	-2.92931	0.00815893	0.0781509	-3.34277	0	ILMN_1665291	NUB1	ILMN_23529	51667	32483375	NM_016118.3	NP_057202.2	6200672	S	2901	GTGGATTGAGTGCCAGGTGCATCCAAGACTTTCCCTCCCTTCCAGAAGGC	+	150706262-150706311	0	0	0	NUB1	negative regulator of ubiquitin-like proteins 1	Nucleus	other	-0.394885	0.247005	d	0.0667078	0.879346	X
OLIG1	-0.654395	7.93912	-3.66511	0.00149164	0.0233693	-1.53944	1	0.00799777	7.93912	0.0447936	0.964706	0.992728	-7.06792	0	ILMN_1666089	OLIG1	ILMN_29928	116448	41281694	NM_138983.1	NP_620450.1	2030403	S	1762	ATGAACGTTCTCATTAACACGCAGGAGTACCGGGAGCCCTGAACCGCCCG	+	33366204-33366253	0	0	0	OLIG1	oligodendrocyte transcription factor 1	Nucleus	transcription regulator	-0.71921	0.143899	1	-0.0130502	0.985822	X
OSBPL7	-0.616843	8.19484	-5.13856	4.66949e-05	0.001538	1.86876	1	-0.784523	8.19484	-6.5354	2.0323e-06	8.89511e-05	4.8711	1	ILMN_1720865	OSBPL7	ILMN_4611	114881	47132623	NM_145798.2	NP_665741.1	1440575	A	3452	GCGCAGGTGTGAGTGTAAGTTCATGTAGGAGAGTGTATGCGTGTGCGCCT	-	43239886-43239935	0	0	0	OSBPL7	oxysterol binding protein-like 7	Cytoplasm	other	-0.125282	0.375804	d	0.0933647	0.535776	0
PGAM4	1.46173	9.01655	10.6738	8.12336e-10	3.02623e-07	12.7182	1	0.308769	9.01655	2.25468	0.0352508	0.222348	-4.7067	0	ILMN_1691104	PGAM4	ILMN_13140	441531	84370365	NM_001029891.2	NP_001025062.1	3990273	A	719	GCAAAGCCATAGAAGCTGTGGCTGCCCAGGGCAAGGCCAAGAAGTGAAGG	-	77111023-77111026:77111027-77111072	0	0	0	PGAM4	phosphoglycerate mutase family member 4	unknown	phosphatase	0.510268	0.425071	d	-0.924686	0.134892	X
PGAM4	0.998357	8.0482	7.17222	5.27222e-07	4.53783e-05	6.3296	1	0.210394	8.0482	1.51147	0.145956	0.511228	-5.94165	0	ILMN_1682953	PGAM4	ILMN_13140	441531	84370365	NM_001029891.2	NP_001025062.1	5890500	I	451	CCCTCCTATGAGAGTCCGAAGGATACTATTGCCAGAGCTCTGCCCTTCTG	-	77111291-77111340	0	0	0	PGAM4	phosphoglycerate mutase family member 4	unknown	phosphatase	0.510268	0.425071	d	-0.924686	0.134892	X
PGAM4	0.905233	8.9235	6.31063	3.31367e-06	0.000195779	4.49975	1	0.480623	8.9235	3.35056	0.00310981	0.0368183	-2.41708	0	ILMN_1706841	PGAM4	ILMN_13140	441531	84370365	NM_001029891.2	NP_001025062.1	6110168	A	967	GCAGTTCTAGAGCACAGGTTCTCAGTCTAAGCTGTGGAAAAGCTCCCCTT	-	77110775-77110824	0	0	0	PGAM4	phosphoglycerate mutase family member 4	unknown	phosphatase	0.510268	0.425071	d	-0.924686	0.134892	X
PPP1CB	0.690152	9.55564	3.71568	0.00132448	0.0213607	-1.42391	1	0.26179	9.55564	1.40944	0.17372	0.555198	-6.08207	0	ILMN_2405018	PPP1CB	ILMN_22939	5500	46249375	NM_206876.1	NP_996759.1	6200369	A	4276	GCTGCCCCTGAGAAGAGACTTAATCCAAGCCTGATTGTACTAGTGGCATC	+	28878805-28878854	0	0	0	PPP1CB	protein phosphatase 1, catalytic subunit, beta isozyme	Cytoplasm	phosphatase	0.273167	0.460352	d	-0.0656479	0.885596	X
PRKCH	0.62634	9.05842	3.26357	0.00380353	0.0475573	-2.44364	1	-0.0378393	9.05842	-0.197163	0.845645	0.965602	-7.04874	0	ILMN_1780898	PRKCH	ILMN_11204	5583	47717140	NM_006255.3	NP_006246.2	3290731	S	3172	AGAAGGGTCACTGCCACAACAGCACAGTCAGCGGGTGAATTACAGGTGCC	+	61087117-61087166	0	0	0	PRKCH	protein kinase C, eta	Cytoplasm	kinase	0.473472	0.291017	d	0.0402474	0.947757	X
PTPN6	-1.05658	11.0084	-5.04971	5.73864e-05	0.00181502	1.66429	1	-0.684658	11.0084	-3.27219	0.00372852	0.0424345	-2.59239	1	ILMN_1738675	PTPN6	ILMN_25213	5777	94557302	NM_080548.3	NP_536858.1	6400465	A	1910	GGAGAAGAGCAAGGGTTCCCTCAAGAGGAAGTGAGCGGTGCTGTCCTCAG	+	6940311-6940344:6940345-6940360	0	1	0	PTPN6	protein tyrosine phosphatase, non-receptor type 6	Cytoplasm	phosphatase	-0.259511	0.236927	d	0.47072	0.0374532	0
PTPRO	-0.650606	8.87637	-3.33111	0.00325325	0.0419791	-2.29347	1	-0.00308097	8.87637	-0.0157746	0.987567	0.99766	-7.06883	0	ILMN_2316878	PTPRO	ILMN_7758	5800	13677221	NM_030671.1	NP_109596.1	3940541	A	3456	GTTGGTGTTTCTTCCTTGGCCCTTTTGGACTAATGTTACTGTCCAAGTTC	+	15640994-15641043	0	0	0	PTPRO	protein tyrosine phosphatase, receptor type, O	Plasma Membrane	phosphatase	-0.739861	0.0660005	1	0.131808	0.786915	X
RAB11FIP1	-1.05397	10.5459	-5.99669	6.62921e-06	0.000331753	3.80936	1	-0.219905	10.5459	-1.25118	0.224983	0.628304	-6.2837	0	ILMN_1692219	RAB11FIP1	ILMN_10834	80223	50659103	NM_001002814.1	NP_001002814.1	6130156	I	7660	CTGTGTGAGCTACTTAACTGACGCCCTCTTCCTCCAACTGAAGGATCGCC	-	37835757-37835806	0	0	0	RAB11FIP1	RAB11 family interacting protein 1 (class I)	Cytoplasm	other	-0.451484	0.0501753	d	0.00172405	0.99624	X
SCAMP3	-0.624588	10.31	-5.48528	2.10253e-05	0.000820861	2.66113	1	-0.263003	10.31	-2.30975	0.0314411	0.205626	-4.60255	0	ILMN_1793712	SCAMP3	ILMN_12257	10067	16445418	NM_005698.2	NP_005689.2	7200292	A	1461	ACTGTGACCTAGTCCCCCCATCAGGCCACACTGCTGCCACCTCTCACACG	-	153492474-153492523	0	0	0	SCAMP3	secretory carrier membrane protein 3	Cytoplasm	transporter	-0.378331	0.117693	d	0.0202028	0.95227	X
SHPK	-0.592892	8.62458	-3.78054	0.00113699	0.0189312	-1.27532	1	-0.141138	8.62458	-0.899956	0.378612	0.770892	-6.65542	0	ILMN_2216918	SHPK	ILMN_22706	23729	74315355	NM_013276.2	NP_037408.2	5310070	S	3420	CACGGTGTCACTTTCCATGGGTTCAGTTATCTGCGGTCAACCACGGTCTG	-	3458673-3458722	0	0	0	SHPK	sedoheptulokinase	Cytoplasm	kinase	-0.248874	0.229767	d	0.00603791	0.984069	X
SLC20A1	0.585037	10.3114	3.26346	0.00380442	0.0475573	-2.44386	1	-0.0216447	10.3114	-0.120739	0.905075	0.980123	-7.06138	0	ILMN_1672662	SLC20A1	ILMN_7081	6574	31543629	NM_005415.3	NP_005406.3	6420731	S	2860	CATGCTCTGCGTTGTTGGTTTCACCAGCTTCTGCCCTCACATGCACAGGG	+	113137447-113137496	0	0	0	SLC20A1	solute carrier family 20 (phosphate transporter), member 1	Plasma Membrane	transporter	0.590998	0.070584	1	0.181864	0.619291	X
TAX1BP1	0.606459	11.1351	3.59338	0.00176501	0.0264708	-1.70277	1	0.378033	11.1351	2.23992	0.0363415	0.227202	-4.73436	0	ILMN_1793118	TAX1BP1	ILMN_183383	8887	119943085	NM_001079864.1	NP_001073333.1	7050470	S	2488	GAGCGGATGCTTTCATGCACCCTTTACTGCACTTTCTGACCAGGAGCTAC	+	27835059-27835108	0	0	0	TAX1BP1	Tax1 (human T-cell leukemia virus type I) binding protein 1	Cytoplasm	other	0.120932	0.419458	d	-0.0519498	0.764742	X
TLN1	-0.661851	10.0778	-5.78527	1.06452e-05	0.000477486	3.338	1	-0.543326	10.0778	-4.74924	0.000115751	0.0024962	0.821192	0	ILMN_1696643	TLN1	ILMN_18029	7094	16753232	NM_006289.2	NP_006280.2	6650433	S	8080	CTATCTTCCCCCACCCCCAGCTACCCATAGGGGCTGCAGAGTTATAAGCC	-	35687374-35687423	0	0	0	TLN1	talin 1	Plasma Membrane	other	-0.163092	0.697278	d	1.2035	0.00483891	X
TNK2	-1.07556	10.5874	-3.94432	0.000772703	0.0140549	-0.898383	1	-0.361542	10.5874	-1.32586	0.199496	0.593645	-6.19107	0	ILMN_1669703	TNK2	ILMN_5336	10188	58331192	NM_005781.4	NP_005772.3	1850482	A	4337	GAGGGACATCAGTGCTTCCTCTTCCACCCAATTCCCCCACGCGGTTCCAT	-	197074722-197074771	0	0	0	TNK2	tyrosine kinase, non-receptor, 2	Cytoplasm	kinase	-0.357283	0.0799977	d	0.0272634	0.921558	X
TOMM40	-0.828543	10.4085	-5.92763	7.73391e-06	0.000374807	3.65594	1	-0.132785	10.4085	-0.949982	0.353206	0.750675	-6.60918	0	ILMN_1683475	TOMM40	ILMN_29459	10452	5174722	NM_006114.1	NP_006105.1	1740494	S	1560	GTCAGTCCACCCTGCCCCGTCCACTTTCCCATCTCCTCGGTATAAATCAT	+	50098656-50098705	0	0	0	TOMM40	translocase of outer mitochondrial membrane 40 homolog (yeast)	Cytoplasm	ion channel	-0.669654	0.183285	1	0.107272	0.869127	X
TRABD	-1.04732	11.2868	-3.28401	0.00362805	0.0457983	-2.39829	1	0.0965914	11.2868	0.302875	0.765043	0.941992	-7.02131	0	ILMN_1755737	TRABD	ILMN_25172	80305	33342277	NM_025204.2	NP_079480.2	270736	S	2241	GCCGGCTGTGTCCTTCCTGCCACACTCGGGGATTCATTCCTTAGAAACTG	+	48980080-48980129	0	0	0	TRABD	TraB domain containing	unknown	other	-0.362973	0.0867263	d	-0.0158631	0.957514	X
TUBB	-0.605568	11.2582	-3.2421	0.00399673	0.0491925	-2.49117	1	-0.114711	11.2582	-0.614141	0.545889	0.861814	-6.87437	0	ILMN_2101885	TUBB	ILMN_23399	203068	34222261	NM_178014.2	NP_821133.1	6580474	S	2246	CTCTGGAGTGGTGTATACTGCCACATCAGTGTTTGAGTCAGTCCCCAGAG	+	30800937-30800986	0	0	0	TUBB	tubulin, beta	Cytoplasm	other	-0.189825	0.620232	d	0.162567	0.684633	X
UBE2F	-0.59338	10.5984	-3.87308	0.000914174	0.0159791	-1.06262	1	-0.0958741	10.5984	-0.625784	0.538374	0.858113	-6.86699	0	ILMN_2164242	UBE2F	ILMN_781	140739	18087856	NM_080678.1	NP_542409.1	20491	S	752	CCCCTGGATTGCCCCAGTCCTGTGACCATGTTGCCCTGAAGAAGACCATC	+	238614821-238614870	0	0	0	UBE2F	ubiquitin-conjugating enzyme E2F (putative)	Cytoplasm	enzyme	-0.360921	0.1532	d	0.353137	0.165752	X
UCK2	-0.647947	8.1176	-5.10828	5.00903e-05	0.00162642	1.79914	1	-0.0702349	8.1176	-0.553717	0.585772	0.87955	-6.91051	0	ILMN_1768662	UCK2	ILMN_23283	7371	20357519	NM_012474.3	NP_036606.2	620725	S	904	TCTCAACGGCTACACCCCTTCACGCAAGAGGCAGGCATCGGAGTCCAGCA	+	164143621-164143670	0	0	0	UCK2	uridine-cytidine kinase 2	Cytoplasm	kinase	-0.475644	0.127198	d	0.18028	0.610247	X
UQCC	-0.628894	8.65307	-5.96456	7.1216e-06	0.000352715	3.73804	1	-0.0400067	8.65307	-0.379431	0.708276	0.925073	-6.99426	0	ILMN_1745152	UQCC	ILMN_26543	55245	41327684	NM_018244.3	NP_060714.3	7040307	A	2200	CTCATTACAGCTGGGCACTATTTACATAAACCAGAGCTGAGCCAGGCAGG	-	33353869-33353918	0	0	0	UQCC	ubiquinol-cytochrome c reductase complex chaperone	Cytoplasm	other	-0.155711	0.388742	d	0.0811294	0.690694	X
	1.33207	7.4383	23.689	2.36384e-16	1.28178e-12	26.372	1	-0.0378867	7.4383	-0.673761	0.508002	0.845551	-6.83519	0	ILMN_1824666		ILMN_79403	NaN	21733442	AL832858		6900601	S	2072	TCCCACAGTTGGTAGTGCCAGGCAGGAAGCAGGAGTGCAGGTTGCAGGAA			0	0	0					-	-	-	-	-	-
	0.89374	8.48711	3.76215	0.00118729	0.0195751	-1.31749	1	-0.563229	8.48711	-2.37088	0.0276589	0.188494	-4.48524	0	ILMN_1898938		ILMN_80341	NaN	46566493	CN484989		7320678	S	396	TGCATGAGATCACACAACTAGGCGGTGACTGAGTCCAACACACCAAAGCC	+	192266925-192266974	0	0	0					-	-	-	-	-	-
	0.291879	9.57331	2.19272	0.0400389	0.246124	-4.64437	0	-1.63818	9.57331	-12.3067	6.42538e-11	1.88899e-08	15.2238	1	ILMN_1827736		ILMN_85209	NaN	34191385	BC038512		4150102	S	4469	CCCCGGAAGTTGCAGAGCAATCTGTGGTGTCTGTCATAGCCCAACTAGTC	+	24478392-24478441	0	0	0	PDK3	pyruvate dehydrogenase kinase, isozyme 3	Cytoplasm	kinase	-	-	-	-	-	-
ADORA2A	1.71824	8.92654	6.42806	2.56468e-06	0.000159645	4.75488	1	1.331	8.92654	4.9794	6.75882e-05	0.00158961	1.35748	1	ILMN_1807372	ADORA2A	ILMN_8227	135	17136146	NM_000675.3	NP_000666.2	7560440	S	2018	TTACCTTTCACTCTCTGGCTGCTGGGTCTGCCGTCGGTCCTGCTGCTAAC	+	23167955-23168004	0	0	0	ADORA2A	adenosine A2a receptor	Plasma Membrane	G-protein coupled receptor	-	-	-	-	-	-
	0.377671	8.8455	1.97775	0.0615799	0.319093	-5.02719	0	-0.820044	8.8455	-4.29433	0.000337937	0.00603219	-0.242407	1	ILMN_1910180		ILMN_127219	NaN	10437021	AK024680		5900364	S	1409	ACACCTTCAGGAGGGAAGCCCTTATTTCTGGGTTGAACTCCCCTTCCATG	+	206352194-206352243	0	0	0	NRP2	neuropilin 2	Plasma Membrane	kinase	-	-	-	-	-	-
KCNJ12	0.0559209	7.07668	0.496789	0.624633	0.892115	-6.75592	0	0.861068	7.07668	7.64953	1.98714e-07	1.3413e-05	7.20951	1	ILMN_1794200	KCNJ12	ILMN_27824	3768	118582281	NM_021012.4	NP_066292.2	4920010	S	1473	CAAGGGCCTGGACCGCATCTTTCTGGTGTCGCCCATCACCATCTTGCATG	+	21260015-21260064	0	0	0	KCNJ12	potassium inwardly-rectifying channel, subfamily J, member 12	Plasma Membrane	ion channel	0.178785	0.555863	X	-0.0625631	0.861105	0
AES	0.0182884	9.9586	0.0966369	0.923955	0.984001	-6.8784	0	-0.743417	9.9586	-3.92826	0.000802548	0.0122547	-1.09547	1	ILMN_1712944	AES	ILMN_25658	166	39811997	NM_001130.5	NP_001121.2	1230458	A	1274	AGTTCCAGACACCTCCACGCCCACCTGGTCCTCTCCCATCGCCCACAAAA	-	3004260-3004309	0	0	0	AES	amino-terminal enhancer of split	Nucleus	transcription regulator	-	-	-	-	-	-
ADAM17	0.586207	8.89954	4.74686	0.000116398	0.00313491	0.963987	1	0.234875	8.89954	1.90192	0.0713515	0.348571	-5.33559	0	ILMN_2121068	ADAM17	ILMN_165100	6868	73747888	NM_003183.4	NP_003174.3	5260546	S	3474	CCTGTAATCCCAGCACTTGGAGAGGCTGAGGTTGCGCCACTACACTCCAG	-	9546891-9546940	0	0	0	ADAM17	ADAM metallopeptidase domain 17	Plasma Membrane	peptidase	0.15636	0.40315	d	0.174148	0.352093	X
KIAA0195	-0.150865	8.76882	-0.770576	0.449763	0.808031	-6.57948	0	-0.765413	8.76882	-3.90951	0.000838876	0.0127021	-1.13897	1	ILMN_2059211	KIAA0195	ILMN_16248	9772	41281472	NM_014738.2	NP_055553.2	380743	S	4593	TCGTGGGTCCCTGGACACGGCCTTGAAGCCAACCTTCTTTGGAGGAGCAA	+	71007369-71007418	0	0	0	KIAA0195	KIAA0195	unknown	other	-0.162894	0.404749	X	0.244376	0.198406	0
AFF1	-0.590343	8.88951	-4.30424	0.000330118	0.00719589	-0.0643072	1	-0.505247	8.88951	-3.68379	0.00142759	0.0195206	-1.65991	0	ILMN_2129015	AFF1	ILMN_170504	4299	5174572	NM_005935.1	NP_005926.1	6060142	S	8459	GCCTGGAGAGGACAAGGGAATAAGACCACTCATAGTGAGGCTGGCCAAGC	+	88280283-88280332	0	0	0	AFF1	AF4/FMR2 family, member 1	Nucleus	transcription regulator	-0.0927762	0.6625	d	-0.252136	0.18078	X
MST1	0.12629	8.28275	1.00051	0.328749	0.721116	-6.37612	0	0.650419	8.28275	5.15282	4.51777e-05	0.00114474	1.75979	1	ILMN_1707464	MST1	ILMN_28025	4485	31543211	NM_020998.2	NP_066278.2	3710202	S	2108	GTGTTTGTGGACTGGATTCACAAGGTCATGAGACTGGGTTAGGCCCAGCC	-	49696456-49696464:49696465-49696505	0	1	0	MST1 (includes EG:15235)	macrophage stimulating 1 (hepatocyte growth factor-like)	Extracellular Space	growth factor	0.110392	0.788186	X	-0.652163	0.0612488	0
PAQR4	-0.637295	9.18149	-2.71025	0.0132979	0.11836	-3.6312	0	-0.790111	9.18149	-3.36014	0.00304145	0.036211	-2.39557	1	ILMN_1660793	PAQR4	ILMN_20105	124222	31542755	NM_152341.2	NP_689554.2	3460132	S	2355	CTTCCATCTGGCTGCACTCCAAGGCCCCCTCTGTCCTTTTCAGAACACAT	+	2963395-2963444	0	0	0	PAQR4	progestin and adipoQ receptor family member IV	unknown	other	-0.112935	0.614742	X	0.0142314	0.960368	0
RPS14	-0.503012	13.3361	-6.64685	1.59865e-06	0.00011035	5.22553	0	-0.772857	13.3361	-10.2126	1.74972e-09	2.87507e-07	11.9509	1	ILMN_1666635	RPS14	ILMN_11276	6208	68160914	NM_001025070.1	NP_001020241.1	5260682	A	491	TGTTGGCTGCCCAGGATGTGGCCCAGAGGTGCAAGGAGCTGGGTATCACC	-	149806595-149806644	0	0	0	RPS14	ribosomal protein S14	Cytoplasm	translation regulator	-0.773379	0.0363089	X	0.294106	0.430832	0
RPS14	-0.387145	12.1084	-3.08833	0.00568803	0.0644952	-2.82863	0	-0.89497	12.1084	-7.13934	5.64522e-07	3.10946e-05	6.15944	1	ILMN_2338785	RPS14	ILMN_10938	6208	68160921	NM_001025071.1	NP_001020242.1	6110356	A	655	CGGATTGAGGATGTCACCCCCATCCCCTCTGACAGCACTCGCAGGAAGGG	-	149804066-149804109:149805365-149805370	0	0	0	RPS14	ribosomal protein S14	Cytoplasm	translation regulator	-0.773379	0.0363089	X	0.294106	0.430832	0
ALDH3B1	-0.661304	9.403	-3.98424	0.000703185	0.0130235	-0.806188	1	0.289318	9.403	1.74309	0.096325	0.412067	-5.5946	0	ILMN_1728662	ALDH3B1	ILMN_27131	221	71773289	NM_000694.2	NP_000685.1	2970356	A	2622	GCTTGAGAAACCTACATTTGGACAATGAGAGGCTGCTCCTGCGGCCTGCG	+	67553126-67553175	0	0	0	ALDH3B1	aldehyde dehydrogenase 3 family, member B1	Cytoplasm	enzyme	-0.32301	0.0618925	d	0.123477	0.502306	X
ANKS1A	-0.593443	9.1053	-4.9792	6.76191e-05	0.00206247	1.50165	1	-0.343104	9.1053	-2.87877	0.0091409	0.0850837	-3.4507	0	ILMN_1813669	ANKS1A	ILMN_25376	23294	140161499	NM_015245.2	NP_056060.2	5390064	S	6002	GCCCAGGCCAGCAGAAAGCAGCTCAGAAGTATTGTTGCTCATGGTGTGGC	+	35166819-35166868	0	0	0	ANKS1A	ankyrin repeat and sterile alpha motif domain containing 1A	Cytoplasm	other	-0.174689	0.398095	d	-0.333047	0.0976463	X
ANTXR2	0.671982	10.2116	3.43853	0.00253458	0.034794	-2.0529	1	0.530039	10.2116	2.71221	0.0132407	0.112085	-3.8006	0	ILMN_1812926	ANTXR2	ILMN_165233	118429	68342041	NM_058172.3	NP_477520.2	10685	S	3579	TGGCGGGCATGTGAGTGCACAAGATGGAAAGAGCGATTGGAGCATCCTGG	-	81045984-81046033	0	0	0	ANTXR2	anthrax toxin receptor 2	Plasma Membrane	other	0.391605	0.327363	d	0.538652	0.172822	X
SLC22A5	-0.434731	7.63959	-4.51866	0.000199039	0.00482015	0.43409	0	-0.594645	7.63959	-6.18084	4.40735e-06	0.000167644	4.093	1	ILMN_1699357	SLC22A5	ILMN_21497	6584	24497491	NM_003060.2	NP_003051.1	7050180	S	2889	CTGGTGCAAGGCCTTACCAGCCCTAGCCTCTAGCACTTCTCTAAGTGCCA	+	131758857-131758906	0	0	0	SLC22A5	solute carrier family 22 (organic cation/carnitine transporter), member 5	Plasma Membrane	transporter	-0.371879	0.114165	X	0.0638069	0.830271	0
ZMYM6	-0.079781	10.4579	-1.02812	0.315894	0.710627	-6.34845	0	0.620783	10.4579	7.99985	9.90052e-08	7.57312e-06	7.9098	1	ILMN_1657632	ZMYM6	ILMN_1275	9204	68509917	NM_007167.2	NP_009098.2	7550722	S	2770	ATCCAGGGTCAGCCAGTGTTGAAAGAGACATTTTGTCTACCTGGCACTGC	-	35219996-35220045	0	0	0	ZMYM6	zinc finger, MYM-type 6	Nucleus	other	-0.373377	0.0530463	X	-0.363614	0.0583081	0
APCDD1L	1.43335	7.59642	3.93959	0.00078138	0.01416	-0.9093	1	0.110559	7.59642	0.303872	0.764294	0.941751	-7.02099	0	ILMN_1689431	APCDD1L	ILMN_29515	164284	23503290	NM_153360.1	NP_699191.1	130138	S	3028	AGGGAAGCCCTTTTCCTCCCTGAGACTGTGTGGGGTTCAGTCAGCCTGCT	-	56467866-56467915	0	0	0	APCDD1L	adenomatosis polyposis coli down-regulated 1-like	unknown	other	0.115245	0.775634	d	0.035469	0.940006	X
BOK	-0.123021	8.52599	-0.711726	0.484669	0.82506	-6.62356	0	-0.598857	8.52599	-3.46463	0.00238497	0.0297068	-2.15986	1	ILMN_1730032	BOK	ILMN_19886	666	34335395	NM_032515.3	NP_115904.1	2600072	S	2260	CCCCTCAGGTGCCCCCACACACAGCCTTCCCTTGACGCCTACATTTCTAG	+	242161885-242161934	0	0	1	BOK	BCL2-related ovarian killer	Cytoplasm	other	0.114857	0.666166	X	0.0147901	0.964219	0
AK3L1	1.53817	8.13268	8.42513	4.34382e-08	6.36598e-06	8.80752	1	0.168053	8.13268	0.920489	0.368041	0.76239	-6.63672	0	ILMN_2338038	AK3L1	ILMN_28560	205	53831999	NM_013410.2	NP_037542.1	160148	A	2006	GGGGTTGAGCAGAATGTTGTACTAGCTGTGCCTGGACTGAGTATAACAGC	+	65465577-65465626	0	0	0	AK4	adenylate kinase 4	Cytoplasm	kinase	-	-	-	-	-	-
AK3L1	0.716927	7.43792	7.51532	2.60637e-07	2.61721e-05	7.03009	1	0.0881079	7.43792	0.923607	0.366453	0.761265	-6.63385	0	ILMN_1764090	AK3L1	ILMN_28797	205	53832000	NM_203464.1	NP_982289.1	4290192	A	1639	CTGAGAGCGATGGGGCTATATTGAATCTCTGTATGCACTGAGAACTGAGC	+	65465168-65465217	0	0	0	AK4	adenylate kinase 4	Cytoplasm	kinase	-	-	-	-	-	-
AK3L1	1.00231	7.51115	11.6039	1.8532e-10	9.72471e-08	14.1518	1	0.037593	7.51115	0.435219	0.667959	0.911621	-6.97079	0	ILMN_1798249	AK3L1	ILMN_28797	205	53832000	NM_203464.1	NP_982289.1	4610554	S	737	CCCGAAGCAGTTGCTGCCAGGCTAAGACAGTACAAAGACGTGGCAAAGCC	+	65463074-65463123	0	0	0	AK4	adenylate kinase 4	Cytoplasm	kinase	-	-	-	-	-	-
SLC25A23	-0.121865	8.59185	-1.10322	0.282735	0.682406	-6.26979	0	0.62185	8.59185	5.6295	1.51395e-05	0.000464971	2.8543	1	ILMN_1679949	SLC25A23	ILMN_172134	79085	48476341	NM_024103.2	NP_077008.2	6280092	S	3372	TCCTTCGACCTCCACTGCGCCCCACCTCCCTGCCTGTGTGTGTTATTTCA	-	6391113-6391162	0	0	0	SLC25A23	solute carrier family 25 (mitochondrial carrier; phosphate carrier), member 23	Cytoplasm	transporter	0.0355188	0.89409	X	-0.267675	0.204286	0
ACVR1B	0.652315	9.39171	5.86909	8.81728e-06	0.000413353	3.52547	1	0.692946	9.39171	6.23466	3.91469e-06	0.000152227	4.2121	1	ILMN_2243308	ACVR1B	ILMN_22498	91	33598913	NM_004302.3	NP_004293.1	4570240	I	4292	CACAGACCAAGTCCAAGCCCGTTCTTACGTCGCCATAAAGGCCCCCGAAC	+	50676893-50676942	0	0	0	ACVR1B	activin A receptor, type IB	Plasma Membrane	kinase	0.252931	0.210258	d	0.451933	0.031381	2
APP	0.774094	8.84498	6.14571	4.76278e-06	0.000255421	4.13853	1	0.444598	8.84498	3.52976	0.00204846	0.0262041	-2.01202	0	ILMN_2404063	APP	ILMN_23272	351	41406056	NM_201414.1	NP_958817.1	3370577	A	2273	GCAGAACTAGACCCCCGCCACAGCAGCCTCTGAAGTTGGACAGCAAAACC	-	26175811-26175851:26175852-26175860	0	0	0	APP	amyloid beta (A4) precursor protein	Plasma Membrane	other	0.380167	0.109513	d	0.488226	0.0449391	X
ADCY3	-0.63874	10.228	-4.74566	0.000116726	0.00314028	0.961202	1	-1.55452	10.228	-11.5496	2.01508e-10	4.86832e-08	14.0966	1	ILMN_1676893	ADCY3	ILMN_26929	109	148536829	NM_004036.3	NP_004027.2	3800050	S	4289	CTTGCCTTTTGAGCTCTTGCTACAGTCGCCTTTGCTACTGCTTTAAGAGA	-	24895600-24895649	0	0	0	ADCY3	adenylate cyclase 3	Plasma Membrane	enzyme	-0.53179	0.0798758	d	-1.75814	0.000213057	2
ARHGAP9	-0.892715	10.91	-5.46058	2.22462e-05	0.00085755	2.60504	1	-0.0949806	10.91	-0.58098	0.567598	0.870956	-6.89465	0	ILMN_1663916	ARHGAP9	ILMN_174787	64333	122939150	NM_001080157.1	NP_001073626.1	110180	S	2426	GTCTCTATCTTCATGAGTGTGACTTGAGGTGTTGGGATGGGTGAGGGAGC	-	56152416-56152465	0	0	0	ARHGAP9	Rho GTPase activating protein 9	Cytoplasm	other	-0.199793	0.325712	d	-0.1823	0.382595	X
ARHGAP9	-0.900225	9.22736	-4.0908	0.000546661	0.0107046	-0.559604	1	-0.457905	9.22736	-2.08081	0.0502118	0.280178	-5.02532	0	ILMN_2382657	ARHGAP9	ILMN_174704	64333	122939148	NM_001080156.1	NP_001073625.1	2650594	A	1373	CGATGGGAGGTATGTGTTCCCAGAACAGCCAGGACAAGAAGGTCGGTTAG	-	56154214-56154226:56154473-56154509	0	0	0	ARHGAP9	Rho GTPase activating protein 9	Cytoplasm	other	-0.199793	0.325712	d	-0.1823	0.382595	X
ARHGEF3	-0.737462	9.05264	-3.5961	0.0017538	0.0263432	-1.69659	1	0.313786	9.05264	1.53012	0.141298	0.50373	-5.91514	0	ILMN_1781010	ARHGEF3	ILMN_18508	50650	9506400	NM_019555.1	NP_062455.1	6250435	S	3381	CTTTGTAGGCGCCATCAGCCACTTTTAGAAGCCATCAGCCAGTGTGTTGG	-	56736615-56736664	0	0	0	ARHGEF3	Rho guanine nucleotide exchange factor (GEF) 3	Cytoplasm	other	-0.922193	0.060128	1	0.226516	0.685041	X
AHR	0.75112	8.38881	3.60708	0.00170924	0.025873	-1.67163	1	0.865794	8.38881	4.15777	0.000466635	0.00787165	-0.561336	1	ILMN_2162799	AHR	ILMN_174431	196	86792459	NM_001621.3	NP_001612.1	6060367	S	3046	CAGACTACCACACATCTTCAGCCACTTCATCATCCGTCAGAAGCCAGACC	+	17349130-17349179	0	0	0	AHR	aryl hydrocarbon receptor	Nucleus	ligand-dependent nuclear receptor	0.015722	0.960968	d	0.587819	0.0180439	2
ALDH2	-0.601631	10.8089	-4.0358	0.000622538	0.0117939	-0.686952	1	-0.898991	10.8089	-6.03052	6.14837e-06	0.000219159	3.75857	1	ILMN_1793859	ALDH2	ILMN_17598	217	25777731	NM_000690.2	NP_000681.2	840253	S	2003	GCAAGCTTCCTCCCTCAGCCATTGATGGAAAGTTCAGCAAGATCAGCAAC	+	110731770-110731819	0	0	0	ALDH2	aldehyde dehydrogenase 2 family (mitochondrial)	Cytoplasm	enzyme	-0.700663	0.0556067	1	-0.765644	0.0385811	2
APBB3	0.595149	11.5527	3.85228	0.000960125	0.0165684	-1.11048	1	0.998979	11.5527	6.4662	2.36078e-06	0.000100533	4.72046	1	ILMN_1740772	APBB3	ILMN_14368	10307	95147535	NM_133172.2	NP_573418.2	4120279	A	1930	GCCTTCTCTGCCTGTCCCTCCGATCCTTGTCCACCGTCTATTTATTGCCC	-	139918209-139918258	0	0	0	APBB3	amyloid beta (A4) precursor protein-binding, family B, member 3	Cytoplasm	other	0.448214	0.0974188	d	0.968093	0.00315118	2
APBB3	0.668361	10.2258	3.71127	0.00133831	0.0215055	-1.43401	1	0.924385	10.2258	5.13291	4.73098e-05	0.0011895	1.7137	1	ILMN_2320513	APBB3	ILMN_14486	10307	95147539	NM_133173.2	NP_573419.2	7320402	A	1975	TTATACGGATGACTGGGAGGCACTGCACCACAACGTAGGACCCTGGCTCC	-	139918149-139918198	0	0	0	APBB3	amyloid beta (A4) precursor protein-binding, family B, member 3	Cytoplasm	other	0.448214	0.0974188	d	0.968093	0.00315118	2
ATN1	0.930848	7.77113	3.82742	0.00101808	0.0173127	-1.16765	1	0.153584	7.77113	0.631499	0.534705	0.856372	-6.86332	0	ILMN_1737833	ATN1	ILMN_7310	1822	55750052	NM_001007026.1	NP_001007027.1	4390543	A	4148	CTGTTAGATGTGGCTGTTTTGCGTAGCATCGTGTGCCACCCCTGCCCCTC	+	6921542-6921591	0	0	0	ATN1	atrophin 1	Nucleus	transcription regulator	0.290687	0.235641	d	0.122928	0.663332	X
APIP	0.830586	9.59175	7.04371	6.89229e-07	5.7497e-05	6.06301	1	0.87951	9.59175	7.4586	2.9251e-07	1.82115e-05	6.82073	1	ILMN_1793598	APIP	ILMN_15379	51074	7705723	NM_015957.1	NP_057041.1	6200202	S	400	GAGGAGCAGGTGCAGTGATTCATACCCACTCTAAAGCTGCTGTGATGGCC	-	34866504-34866551:34866875-34866876	0	0	0	APIP	APAF1 interacting protein	Cytoplasm	enzyme	0.537747	0.0966105	d	1.07203	0.00475027	2
ATP1B3	0.886776	8.85269	7.54386	2.45977e-07	2.51133e-05	7.08762	1	0.467021	8.85269	3.97298	0.000722131	0.011257	-0.991656	0	ILMN_1654322	ATP1B3	ILMN_3785	483	49574492	NM_001679.2	NP_001670.1	3130092	I	217	GAGTGGAAGCTCTTCATCTACAACCCGACCACCGGAGAATTCCTGGGGCG	+	143078376-143078425	0	0	0	ATP1B3	ATPase, Na+/K+ transporting, beta 3 polypeptide	Plasma Membrane	transporter	0.432984	0.101967	d	0.70881	0.0139258	X
APP	0.836041	8.77126	5.68545	1.33365e-05	0.00056992	3.11377	1	0.586294	8.77126	3.98706	0.000698514	0.0109575	-0.958943	1	ILMN_2404065	APP	ILMN_23272	351	41406056	NM_201414.1	NP_958817.1	650110	A	2074	TCATTGGACTCATGGTGGGCGGTGTTGTCATAGCGACAGTGATCGTCATC	-	26185961-26186010	0	0	0	APP	amyloid beta (A4) precursor protein	Plasma Membrane	other	0.380167	0.109513	d	0.488226	0.0449391	2
AXL	-0.598471	7.44374	-3.55767	0.00191897	0.0280977	-1.78382	1	-0.520394	7.44374	-3.09354	0.00562074	0.0582633	-2.98704	0	ILMN_1701877	AXL	ILMN_28087	558	21536465	NM_021913.2	NP_068713.2	4640403	A	4879	GGGATGGACGATCTCCCACCTTTCGGGCCATGTTGCCCCCGTGAGCCAAT	+	46459368-46459417	0	0	0	AXL	AXL receptor tyrosine kinase	Plasma Membrane	kinase	-1.02835	0.0881742	1	-1.06463	0.0791294	X
BAMBI	0.867524	7.60533	9.40158	7.15781e-09	1.56644e-06	10.5873	1	0.366938	7.60533	3.97661	0.000715972	0.0111847	-0.98323	0	ILMN_1691410	BAMBI	ILMN_8469	25805	62953114	NM_012342.2	NP_036474.1	430050	S	1418	CACACTGTCACCAGGGTTATTTGCATCCAAGGGAGCTGGAATTGAGTACC	+	29011568-29011617	0	0	0	BAMBI	BMP and activin membrane-bound inhibitor homolog (Xenopus laevis)	Plasma Membrane	other	0.903596	0.145599	1	0.24557	0.740213	X
BBX	0.756324	9.44285	5.92803	7.72698e-06	0.000374807	3.65683	1	0.269507	9.44285	2.11238	0.0471286	0.269341	-4.96867	0	ILMN_1745415	BBX	ILMN_28437	56987	142380258	NM_020235.3	NP_064620.2	2370703	S	3093	CTACCCTAGCCTTGTCTTTACCGAGGGATGCTAGTGAGTCCAAGTGGTGG	+	109007031-109007080	0	0	0	BBX	bobby sox homolog (Drosophila)	Nucleus	other	0.523326	0.105466	d	0.18669	0.60989	X
BCL2	0.755868	8.00797	4.42005	0.000251143	0.00580316	0.204865	1	0.195645	8.00797	1.14406	0.265804	0.672948	-6.40848	0	ILMN_2246956	BCL2	ILMN_171007	596	72198188	NM_000633.2	NP_000624.2	4150201	I	5969	CATGCACCTAAACCTTTTGGAAAATCTGCCGTGGGCCCTCCAGATAGCTC	-	58942032-58942081	0	1	0	BCL2	B-cell CLL/lymphoma 2	Cytoplasm	transporter	0.44643	0.137748	d	0.305578	0.326041	X
BCOR	0.875169	9.04167	3.63415	0.00160407	0.0247024	-1.61001	1	0.652907	9.04167	2.71121	0.01327	0.112294	-3.80268	0	ILMN_1773117	BCOR	ILMN_165939	54880	21071036	NM_017745.4	NP_060215.4	510576	I	5772	GGCCATGACTGTAGAGTGGTCAGAACTGTGTGGTTGGTTTGAGGGAGCGA	-	39795901-39795950	0	0	0	BCOR	BCL6 corepressor	Nucleus	transcription regulator	0.979566	0.074441	1	0.936963	0.0872555	X
BCOR	0.659722	7.81183	4.51696	0.000199842	0.00483045	0.430122	1	0.284004	7.81183	1.94451	0.0657075	0.331609	-5.26345	0	ILMN_1676241	BCOR	ILMN_16794	54880	21071035	NM_020926.2	NP_065977.1	6760273	I	3384	GCAATGTGGCCAGTAAGAGAACGTGAGTGGTAGCACTGAGGCGTGTCTGG	-	39816360-39816409	0	0	1	BCOR	BCL6 corepressor	Nucleus	transcription regulator	0.979566	0.074441	1	0.936963	0.0872555	X
ARHGAP15	-0.634793	8.82483	-3.43429	0.00255976	0.0350425	-2.06244	1	-1.26103	8.82483	-6.8223	1.09926e-06	5.4338e-05	5.48912	1	ILMN_2208413	ARHGAP15	ILMN_3543	55843	28466978	NM_018460.2	NP_060930.2	1660685	S	1364	GTCCACGCAAAGCTTGGGGATTGTATTTGGACCTACCCTTCTGCGAGCTG	+	144242060-144242109	0	0	0	ARHGAP15	Rho GTPase activating protein 15	Cytoplasm	other	-0.966854	0.0524097	1	-1.87866	0.00209996	2
ARHGEF6	-1.18102	10.6096	-6.10593	5.20083e-06	0.000271746	4.05093	1	-0.836302	10.6096	-4.32371	0.000315274	0.0056922	-0.173705	1	ILMN_1803423	ARHGEF6	ILMN_26689	9459	47078220	NM_004840.2	NP_004831.1	770703	S	5105	TGGGTTCCTGTTGCCCTGTAATTAAACTGCTGCCCGTAGAGGCCTTTCAG	-	135575492-135575541	0	0	0	ARHGEF6	Rac/Cdc42 guanine nucleotide exchange factor (GEF) 6	Cytoplasm	other	-0.215593	0.316888	d	-0.50501	0.0241937	2
ARMC7	-0.775738	8.52778	-8.5869	3.19512e-08	5.0957e-06	9.1114	1	-0.820312	8.52778	-9.0803	1.27842e-08	1.4442e-06	9.9637	1	ILMN_1797298	ARMC7	ILMN_163623	79637	20149678	NM_024585.2	NP_078861.1	730020	S	1907	CCCCTCAAGGCTGACCCCTTAGATGGCCCAGGAATGGCAGGTGCTACAAA	+	70637736-70637785	0	0	0	ARMC7	armadillo repeat containing 7	unknown	other	-0.2093	0.238316	d	-0.403932	0.0289694	2
ASGR1	-0.604603	8.89197	-3.62369	0.00164394	0.0251813	-1.63384	1	-1.25941	8.89197	-7.54825	2.43799e-07	1.57567e-05	7.0039	1	ILMN_1769013	ASGR1	ILMN_17580	432	18426870	NM_001671.2	NP_001662.1	2370064	S	1165	GGGGAAGGATAGGGTGATGTTCCGAAGGTGAGGAGCTTGAAACCCGTGGC	-	7017542-7017591	0	0	0	ASGR1	asialoglycoprotein receptor 1	Plasma Membrane	transmembrane receptor	-0.212122	0.681054	d	-1.20557	0.0140748	2
BRMS1	-0.604133	11.2801	-4.49657	0.000209676	0.00501107	0.382742	1	0.325645	11.2801	2.42378	0.0247308	0.174639	-4.38234	0	ILMN_2398432	BRMS1	ILMN_18543	25855	68348703	NM_001024958.1	NP_001020129.1	4570102	A	646	AAGATGCCAGGCCCCCCAGGTGTTCTCAGGGCAGTTCTTGGTGTCTGCTT	-	65861424-65861473	0	0	0	BRMS1	breast cancer metastasis suppressor 1	Nucleus	other	-0.195508	0.172814	d	0.333941	0.0269898	X
BRPF3	0.604726	8.94663	4.26459	0.000362534	0.00774391	-0.156414	1	0.497684	8.94663	3.50972	0.00214672	0.0272256	-2.05759	0	ILMN_1658800	BRPF3	ILMN_8164	27154	148727367	NM_015695.2	NP_056510.2	4480280	S	5750	ATGCTCTTTTAGAACGGGAAACGGCTCAGATCCTGCTGTGGCACGGGGCC	+	36308272-36308321	0	0	0	BRPF3	bromodomain and PHD finger containing, 3	Cytoplasm	other	0.869673	0.0934424	1	0.861372	0.0978188	X
ATP1B3	0.668347	10.1058	4.23001	0.000393395	0.00829287	-0.236704	1	0.73581	10.1058	4.65699	0.000143739	0.00297866	0.605709	1	ILMN_1783304	ATP1B3	ILMN_163124	483	113415255	XM_001133534.1	XP_001133534.1	1510088	A	1248	GGTACCCGGCCAACATCAAGTGACTTTATAGCTGCAAGAAATGTGGTATG			0	0	0	ATP1B3	ATPase, Na+/K+ transporting, beta 3 polypeptide	Plasma Membrane	transporter	0.432984	0.101967	d	0.70881	0.0139258	2
ATP6V0E2	-0.936134	9.46477	-3.74641	0.00123212	0.0201778	-1.35357	1	-0.9039	9.46477	-3.61741	0.00166833	0.0221244	-1.81205	1	ILMN_1785095	ATP6V0E2	ILMN_9517	155066	154689665	NM_145230.2	NP_660265.2	6180088	S	2628	TCTGAGCCTCCGTCGCCCCTCCTGTTGGGTAAGGGTGTTGAGTGTGACTT	+	149208621-149208670	0	0	0	ATP6V0E2	ATPase, H+ transporting V0 subunit e2	Cytoplasm	enzyme	-0.134014	0.544965	d	-0.25215	0.224214	d
BMF	-0.945367	9.21981	-3.93087	0.000797619	0.0144115	-0.929404	1	-1.40443	9.21981	-5.83966	9.41934e-06	0.000314851	3.33031	1	ILMN_1695354	BMF	ILMN_17261	90427	51558692	NM_033503.3	NP_277038.1	110280	A	4249	TCCCTGCTCTGGGAGCATTGCTAGCCTTCTACCCCATCCCTGGATCCACA	-	38167622-38167671	0	0	0	BMF	Bcl2 modifying factor	Cytoplasm	other	-0.433296	0.127829	d	-0.311686	0.285581	d
BMF	-1.1053	9.26519	-4.64915	0.000146412	0.00375865	0.737236	1	-1.3965	9.26519	-5.87403	8.72018e-06	0.000295989	3.40772	1	ILMN_2308338	BMF	ILMN_17808	90427	51558703	NM_001003943.1	NP_001003943.1	7650209	A	3771	AACAGCTCTGTGTGTGAAGGTGAGGACTCTTGGAAGCAGGCCATCCTGGC	-	38167853-38167902	0	0	1	BMF	Bcl2 modifying factor	Cytoplasm	other	-0.433296	0.127829	d	-0.311686	0.285581	d
BRSK1	0.719268	10.8274	3.44177	0.00251551	0.0345808	-2.0456	1	1.22805	10.8274	5.87633	8.67526e-06	0.000294826	3.4129	1	ILMN_2185845	BRSK1	ILMN_4209	84446	24308325	NM_032430.1	NP_115806.1	2000110	S	3011	TGCTCTCCGGAAGGAATTCTGGTTTCGCGTGATCCTGCCTGCGTCCGTGT	+	60515645-60515694	0	0	0	BRSK1	BR serine/threonine kinase 1	Cytoplasm	kinase	0.310076	0.122764	d	0.658993	0.0050618	2
BTG1	1.08274	11.9383	4.6427	0.000148649	0.00380005	0.722255	1	1.19504	11.9383	5.12425	4.82691e-05	0.00120686	1.69365	1	ILMN_1775743	BTG1	ILMN_18038	694	4502472	NM_001731.1	NP_001722.1	4730369	S	1438	GACCCTTAAAAAGACACTGTCTCAACTGTGGTGTTAGCACCAGCCAGCTC	-	91061324-91061373	0	1	1	BTG1	B-cell translocation gene 1, anti-proliferative	Nucleus	transcription regulator	0.65769	0.0572922	1	0.676775	0.0509937	1
C19orf70	-0.710141	9.77027	-4.78933	0.000105371	0.00289218	1.06243	1	-0.646908	9.77027	-4.36287	0.000287427	0.00528524	-0.0821343	1	ILMN_1765684	C19orf70	ILMN_12905	125988	45387954	NM_205767.1	NP_991330.1	4200181	S	616	CCCCAGCTCCCAGCCCCTCCAAAGATTTACTTTCCCATCCGTGACTCCTG	-	5630363-5630407:5630597-5630601	0	0	0	C19orf70	chromosome 19 open reading frame 70	Cytoplasm	other	-0.168628	0.339762	d	-0.459727	0.0145224	2
C20orf160	1.06498	7.35142	7.90995	1.182e-07	1.4421e-05	7.81536	1	0.77615	7.35142	5.76472	1.11497e-05	0.000360589	3.16109	1	ILMN_1748206	C20orf160	ILMN_28089	140706	31542254	NM_080625.2	NP_542192.2	2900239	S	2339	GGATCTGGAGCCTCTATCTGGTTAGTGTCGTAACCTCTGTGTGCCTCCCG	+	30083460-30083509	0	0	0	C20orf160	chromosome 20 open reading frame 160	unknown	other	1.01744	0.0800953	1	1.43838	0.0194875	2
CAPN1	-0.593124	10.6732	-3.8274	0.00101815	0.0173127	-1.16772	1	-0.165454	10.6732	-1.06767	0.298104	0.704883	-6.49146	0	ILMN_1705261	CAPN1	ILMN_10477	823	12408655	NM_005186.2	NP_005177.2	1570672	S	2881	AAAGGGGACTCTTCAGGGACTTGTGTACTGGTTATGGGGGTGCCAGAGGC	+	64735926-64735975	0	0	0	CAPN1	calpain 1, (mu/I) large subunit	Cytoplasm	peptidase	-0.411667	0.114413	d	-9.46046e-05	0.999876	X
CARD9	-1.05948	10.7966	-3.61575	0.00167482	0.0255341	-1.65189	1	0.773357	10.7966	2.63929	0.0155398	0.125684	-3.95075	0	ILMN_1712532	CARD9	ILMN_22365	64170	146229336	NM_052813.3	NP_434700.2	3060494	S	1969	GTGCTCACCACCCCCATGCACACGCCATCTGTGTAACTTCAGGATCTGTT	-	138378318-138378367	0	0	0	CARD9	caspase recruitment domain family, member 9	Cytoplasm	other	-0.0233048	0.942159	d	0.186704	0.470084	X
CARM1	-0.600922	11.1865	-3.57475	0.00184377	0.0273259	-1.74509	1	-0.512409	11.1865	-3.04821	0.00623271	0.0632031	-3.08596	0	ILMN_1680134	CARM1	ILMN_5570	10498	40288287	NM_199141.1	NP_954592.1	460382	S	2806	GGCCTGAGTAGCTCCCCTCCATCCTTGTAGACGCTCCAGTCCCTACTACT	+	10894286-10894335	0	0	0	CARM1	coactivator-associated arginine methyltransferase 1	Nucleus	transcription regulator	-0.628987	0.0617588	1	-0.603613	0.0715668	X
CCDC6	-0.697429	9.96776	-5.78901	1.05559e-05	0.00047567	3.34638	1	-0.290827	9.96776	-2.41401	0.0252491	0.177066	-4.40145	0	ILMN_1745904	CCDC6	ILMN_19206	8030	46852389	NM_005436.2	NP_005427.2	7330435	S	5454	AGAGGAGAGCCAAGCGCTAGCATGCCTTTTGCCTCTGCATATCTGTGCAC	-	61218728-61218777	0	0	0	CCDC6	coiled-coil domain containing 6	Cytoplasm	other	-0.325129	0.215335	d	-0.086408	0.788989	X
ANKRD57	0.894607	9.17421	6.93151	8.72461e-07	6.91198e-05	5.8284	1	0.378571	9.17421	2.93321	0.00808762	0.0776647	-3.33442	0	ILMN_1724040	ANKRD57	ILMN_169270	65124	95147339	NM_023016.3	NP_075392.2	2510224	S	4529	CTAGTTTTTTCACGCCTGCAATCTTGGAGTCTAGGTTGCCTTGTCTCTCC	+	109733728-109733777	0	0	0	ANKRD57	ankyrin repeat domain 57	Nucleus	transcription regulator	-	-	-	-	-	-
CCRN4L	0.663393	7.31016	6.28293	3.52101e-06	0.000205415	4.43931	1	-0.0661388	7.31016	-0.626394	0.537981	0.857907	-6.8666	0	ILMN_1689378	CCRN4L	ILMN_170347	25819	31083027	NM_012118.2	NP_036250.2	460484	S	1861	TCATTTTCTGCGTTTCCAGCATGCCCTTGGAAAAGACTCCCTTTAGTCCC	+	140186450-140186499	0	0	0	CCRN4L	CCR4 carbon catabolite repression 4-like (S. cerevisiae)	Nucleus	transcription regulator	0.515201	0.0792556	d	-0.177599	0.585467	X
CD55	0.793253	8.00396	3.29475	0.00353907	0.044919	-2.37443	1	0.592653	8.00396	2.46156	0.0228187	0.1651	-4.30808	0	ILMN_1800540	CD55	ILMN_18297	1604	40788009	NM_000574.2	NP_000565.1	2340220	S	1916	GGTAAAACATGCTGGTGAACCAGGGGTGTTGATGGTGATAAGGGAGGAAT	+	205600102-205600151	0	0	0	CD55	CD55 molecule, decay accelerating factor for complement (Cromer blood group)	Plasma Membrane	other	1.31266	0.0755368	1	0.657385	0.390456	X
C2CD2	-0.831889	8.82794	-6.40801	2.67906e-06	0.000165708	4.71143	1	-0.94683	8.82794	-7.29339	4.10354e-07	2.41569e-05	6.48026	1	ILMN_1652512	C2CD2	ILMN_182120	25966	119226221	NM_015500.1	NP_056315.1	6770209	S	6252	AGCCTGCACACGGGCTTGGGTGGGTTCCTTTGGAGAAGATGTGGCTGGAA	-	42178333-42178382	0	0	0	C2CD2	C2 calcium-dependent domain containing 2	Cytoplasm	other	-0.332304	0.15333	d	-0.700952	0.0078761	2
CENPB	-0.889295	11.4997	-5.23109	3.76981e-05	0.0013079	2.08115	1	0.0376447	11.4997	0.221437	0.826947	0.960004	-7.04346	0	ILMN_1664028	CENPB	ILMN_183841	1059	51944960	NM_001810.5	NP_001801.1	610056	S	2744	GGGCCCAGAGTCCAGCCGTCCAGCTGCTCCTTTCCCAGTTTGATTTCAAT	-	3712544-3712593	0	0	0	CENPB	centromere protein B, 80kDa	Nucleus	other	-0.111302	0.711204	d	0.148757	0.61328	X
CALM3	-0.931091	12.2273	-5.0253	6.07377e-05	0.00190523	1.60802	1	-0.594675	12.2273	-3.2096	0.00430749	0.0473989	-2.73149	1	ILMN_1666385	CALM3	ILMN_3508	808	58218967	NM_005184.2	NP_005175.2	2750184	S	2100	CAGCCAAGAGCTGAGGGTAAGGGCAGGTAGGCGTGAGGCTGTGGACATTT	+	51805720-51805769	0	0	0	CALM1 (includes others)	calmodulin 1 (phosphorylase kinase, delta)	unknown	other	-0.03896	0.912209	d	-0.350178	0.198112	d
CAMK2G	-0.585745	8.18311	-6.80695	1.1357e-06	8.6063e-05	5.56593	1	-0.638196	8.18311	-7.41648	3.18766e-07	1.95187e-05	6.73428	1	ILMN_1809695	CAMK2G	ILMN_25332	818	26667190	NM_001222.2	NP_001213.2	1010475	A	3371	TATGGCTGCTCCAGCCCCACTTCTTAGCATTCTTACTCCTCTTCTGGGGC	-	75242468-75242517	0	0	0	CAMK2G	calcium/calmodulin-dependent protein kinase II gamma	Cytoplasm	kinase	-0.402882	0.0780818	d	-0.423204	0.0657127	d
CIITA	-0.694804	7.83488	-8.35857	4.93381e-08	7.0859e-06	8.68143	1	-0.566437	7.83488	-6.81431	1.11807e-06	5.48932e-05	5.47206	0	ILMN_1773363	CIITA	ILMN_22738	4261	73747680	NM_000246.2	NP_000237.1	4210167	S	4544	GGGTTTGAGTTCATACCCTGTTACCATTTTGGGGTACCCACTGCTCTGGT	+	10926233-10926282	0	0	0	CIITA	class II, major histocompatibility complex, transactivator	Nucleus	transcription regulator	-0.521168	0.134086	d	-0.672729	0.0579736	X
CLEC16A	-0.606342	9.71396	-5.56164	1.76648e-05	0.000716012	2.83426	1	0.278807	9.71396	2.55734	0.0185721	0.142805	-4.1171	0	ILMN_1781752	CLEC16A	ILMN_19348	23274	54792781	NM_015226.1	NP_056041.1	160224	S	6408	GCCCTGCCAGACGCGCTAGATTCCTCTAAGGTCTCTGAGATGCACCGTTT	+	11183161-11183210	0	0	0	CLEC16A	C-type lectin domain family 16, member A	unknown	other	-0.0395736	0.844533	d	0.216138	0.190942	X
CDK10	-0.936482	10.3167	-5.33765	2.94912e-05	0.00107808	2.32494	1	-1.23801	10.3167	-7.05624	6.71396e-07	3.59322e-05	5.98504	1	ILMN_1741459	CDK10	ILMN_15483	8558	32528265	NM_052988.2	NP_443714.2	1850309	A	1702	ACATGGAGGACCCAACAGGAGGCCGTGGCTCTGATGCTGAGCGAAGCTAT	+	88290181-88290230	0	0	0	CDK10	cyclin-dependent kinase 10	Nucleus	kinase	-0.153393	0.41026	d	-0.234966	0.194706	d
COX10	-0.588385	8.87347	-4.66947	0.000139585	0.00361958	0.784411	1	-0.454541	8.87347	-3.60728	0.00170845	0.0225584	-1.83523	0	ILMN_1670901	COX10	ILMN_21275	1352	17921981	NM_001303.2	NP_001294.2	3930053	S	2855	CTTCCCTCTTGGCTGCCCCCAGGTATTTACTGTGGAGAACATTGCATAGG	+	14052574-14052623	0	0	0	COX10 (includes EG:1352)	COX10 homolog, cytochrome c oxidase assembly protein, heme A: farnesyltransferase (yeast)	Cytoplasm	enzyme	-0.389856	0.0711162	d	-0.108219	0.65991	X
CPSF1	-0.887504	9.28113	-4.29007	0.000341353	0.00738419	-0.0972245	1	-0.459052	9.28113	-2.21899	0.0379406	0.234021	-4.77338	0	ILMN_1654545	CPSF1	ILMN_22094	29894	56676370	NM_013291.2	NP_037423.2	3130349	S	4414	GGATGCCGTCACCACCAGCACACGGAACTACCTCCCACCCCCTTTTTGTA	-	145589284-145589333	0	0	0	CPSF1	cleavage and polyadenylation specific factor 1, 160kDa	Nucleus	other	-0.135613	0.535524	d	-0.255003	0.214505	X
CRELD2	-0.619141	10.1204	-5.79279	1.04665e-05	0.000472184	3.35484	1	-0.491959	10.1204	-4.60285	0.000163251	0.00331681	0.47916	0	ILMN_1748707	CRELD2	ILMN_20793	79174	31543145	NM_024324.2	NP_077300.2	6560390	S	1160	TATTCAGAAGGATGTCCCGTGGAAAATGTGGCCCTGAGGATGCCGTCTCC	+	48706983-48707032	0	0	0	CRELD2	cysteine-rich with EGF-like domains 2	unknown	other	-0.117395	0.581613	d	-0.220936	0.266316	X
DAGLB	-0.66486	10.543	-4.59453	0.00016648	0.00416858	0.610375	1	0.407238	10.543	2.81423	0.0105602	0.0946631	-3.58737	0	ILMN_1658885	DAGLB	ILMN_1764	221955	21040276	NM_139179.1	NP_631918.1	2680020	S	2781	CTGGCTCTGGGGTCGGCCAGTGGATTCAGGAGTTGAAACAATAAAGCGCG	-	6415293-6415342	0	0	0	DAGLB	diacylglycerol lipase, beta	Plasma Membrane	enzyme	-0.153067	0.578375	d	0.224783	0.395137	X
CHPF	0.869101	7.36386	6.89517	9.42026e-07	7.40302e-05	5.75205	1	1.25785	7.36386	9.97938	2.603e-09	3.92073e-07	11.5548	1	ILMN_1731353	CHPF	ILMN_22953	79586	34222219	NM_024536.4	NP_078812.2	4250291	S	2730	CCCCCTGACGCTGCTGATTCGGGCTGTGGCCTCCACGTATTTATGCAGTA	-	220112075-220112124	0	0	0	CHPF	chondroitin polymerizing factor	Cytoplasm	enzyme	0.227597	0.129485	d	0.367627	0.0213744	2
CHST13	-1.81655	10.2672	-7.31452	3.92887e-07	3.57051e-05	6.62212	1	-2.46203	10.2672	-9.91362	2.91477e-09	4.29748e-07	11.4419	1	ILMN_1734707	CHST13	ILMN_8583	166012	23097237	NM_152889.1	NP_690849.1	4050768	S	1645	CAGAGCCCCTGGTGCAATGCGGTCACAGGTTTTATGGGACTTTGGTGAGC	+	127744730-127744779	0	0	0	CHST13	carbohydrate (chondroitin 4) sulfotransferase 13	Cytoplasm	enzyme	-0.790541	0.0737815	1	-1.48026	0.00428643	2
DDX19A	-0.649711	9.09187	-6.73807	1.31512e-06	9.56508e-05	5.41991	1	-0.238927	9.09187	-2.47788	0.0220363	0.161474	-4.27581	0	ILMN_2197101	DDX19A	ILMN_10415	55308	34147562	NM_018332.3	NP_060802.1	3520689	S	2663	TAGGAGGATCGCTTGAGCCTGGGTAGAGGCTGCTGTGAGCTGAAATGGCG	+	68964545-68964594	0	0	0	DDX19A	DEAD (Asp-Glu-Ala-As) box polypeptide 19A	Nucleus	enzyme	-0.561549	0.0572092	d	-0.128141	0.70538	X
COBLL1	0.637256	8.01152	5.77449	1.0907e-05	0.000486548	3.31383	1	-1.30347	8.01152	-11.8114	1.34881e-10	3.4997e-08	14.4932	1	ILMN_1761260	COBLL1	ILMN_12678	22837	62821786	NM_014900.3	NP_055715.3	5080601	S	4717	TGTCGGCTTACAGCTCTTCCGGAGTCTAGAGCCTGTTGGTGTTCTGTCCC	-	165249658-165249707	0	0	0	COBLL1	COBL-like 1	unknown	other	0.223518	0.305144	d	-0.840058	0.00198019	2
DEXI	-0.705462	8.85448	-4.1609	0.000463198	0.00940562	-0.397103	1	0.155257	8.85448	0.915727	0.370475	0.764122	-6.64109	0	ILMN_1738866	DEXI	ILMN_4010	28955	33620720	NM_014015.3	NP_054734.2	2470386	S	1302	CGCTCCTTCATTTCAGGTTACTCGTTCTTCAGCAAGTTGGCAAAACAGAC	-	10930398-10930447	0	0	0	DEXI	Dexi homolog (mouse)	unknown	other	-0.660817	0.119577	1	0.326655	0.47325	X
	-0.912081	9.43801	-9.38541	7.36759e-09	1.59801e-06	10.5589	1	-0.729785	9.43801	-7.50957	2.63697e-07	1.68058e-05	6.92501	1	ILMN_1900661		ILMN_78147	NaN	50503246	CR622439		5870605	S	1020	CTTGCCAGTGGCCCTGTCACTCCCATGATGCTTTGGTTTTGAGAGTTGGG	+	15867806-15867855	0	0	0					-	-	-	-	-	-
	-0.397667	8.33684	-3.80953	0.00106193	0.0179199	-1.20877	0	-0.601789	8.33684	-5.76496	1.11438e-05	0.000360589	3.16162	1	ILMN_1856480		ILMN_71591	NaN	34191392	BC035116		4780187	S	4077	GCATGGCGTGTCATTTGGGTCGCTTTGATGGGTGCTCGGGTAGAACTAGC	+	162279213-162279262	0	0	0					-	-	-	-	-	-
	-1.12153	10.877	-5.19567	4.0913e-05	0.00138848	1.99993	1	-0.58781	10.877	-2.72312	0.0129258	0.109992	-3.77797	0	ILMN_1913060		ILMN_81443	NaN	34532879	AK126405		1440064	S	1793	TGAGAGCTTCCCCTGAGGACTCTGCAAAACGAGGTGGTGTCTGGTTTGGA	-	107206207-107206256	0	0	0	CMKLR1	chemokine-like receptor 1	Plasma Membrane	G-protein coupled receptor	-	-	-	-	-	-
	-0.227154	8.14611	-3.46745	0.00236933	0.033024	-1.98778	0	-0.894345	8.14611	-13.652	9.58698e-12	3.96495e-09	17.0857	1	ILMN_1902658		ILMN_72286	NaN	34527067	AK130294		2060014	S	4703	CGCCCCTATCCAGCAGGAAGCAGCCAGATGATCAACGACGCCCTTTTTCC	-	62563495-62563544	0	0	0	LOC92249	hypothetical LOC92249	unknown	other	-	-	-	-	-	-
	-0.853891	9.40843	-7.1572	5.4394e-07	4.64892e-05	6.29855	1	-1.07257	9.40843	-8.99017	1.50779e-08	1.62077e-06	9.79839	1	ILMN_1915076		ILMN_87364	NaN	34529571	AK123915		520747	S	2721	CCTACTCCTACAGTGCCTTGCATTCCGTAGCTGCTCAGTACATTAACCCA	-	76405353-76405402	0	0	0					-	-	-	-	-	-
	-0.688649	7.95265	-5.78665	1.06122e-05	0.000477435	3.34109	1	-0.394364	7.95265	-3.31381	0.00338634	0.0392912	-2.49945	0	ILMN_1840920		ILMN_88069	NaN	21733307	AL832727		2480524	S	4270	GGCTCCTGCTTCTTCTAACTTGGATGGGTTTGGGGATTGCCCCCCTGACC			0	0	0	FYB	FYN binding protein	Nucleus	other	-	-	-	-	-	-
	-0.888808	9.44977	-5.29384	3.2619e-05	0.00116792	2.22483	1	-0.578107	9.44977	-3.44327	0.00250674	0.0309003	-2.2082	0	ILMN_1865764		ILMN_88177	NaN	22209057	BC036485		1510608	S	2556	TGCTGTTGGGTCGGAGTGCCAGTCACTGCTTTGGAAGTCTGTGTTCTGGG	-	180217947-180217996	0	0	0	ZMAT3	zinc finger, matrin-type 3	Nucleus	other	-	-	-	-	-	-
	-0.110487	7.72753	-0.676232	0.506464	0.836084	-6.64853	0	-0.734053	7.72753	-4.49274	0.000211579	0.00410393	0.221629	1	ILMN_1848893		ILMN_89560	NaN	19048181	BM726848		6900056	S	446	TGTGCCCAGGACTGCAATGGCCTCCCACACTACCTCACTACCCTGGTCCA	-	44403413-44403462	0	0	0					-	-	-	-	-	-
	-0.397175	8.03985	-3.35974	0.00304427	0.0399803	-2.22957	0	-1.73645	8.03985	-14.6887	2.44755e-12	1.45665e-09	18.409	1	ILMN_1849186		ILMN_91344	NaN	13279127	BC004287		1820743	S	2783	GAAGTGGCTCTGTCCCCCCAGAGTTAAGGATTTGCTACACTGGTCCTCTG	-	81703551-81703600	0	0	0	ZNF704	zinc finger protein 704	unknown	other	-	-	-	-	-	-
	-0.143119	8.4094	-1.30204	0.207367	0.598931	-6.03823	0	-0.600725	8.4094	-5.46515	2.2015e-05	0.00063273	2.47909	1	ILMN_1882590		ILMN_101614	NaN	21754076	AK094914		3400709	S	3383	CGACCGGCTCGTATTCCGATCAGTCGCTTCCATTGTTAGCATCGTACACG	-	138038805-138038854	0	0	0	NACC2	NACC family member 2, BEN and BTB (POZ) domain containing	Nucleus	transcription regulator	-	-	-	-	-	-
	-0.250616	7.6539	-2.59337	0.0171763	0.141353	-3.86981	0	-0.663102	7.6539	-6.86175	1.01104e-06	5.07102e-05	5.57326	1	ILMN_1832528		ILMN_103415	NaN	11949844	BF675949		5870689	S	361	CCAGAAATATGCTTATCCATCCCACGGGTCTTTGGCATGCTTTTGCCTTC	+	221060952-221061001	0	0	0					-	-	-	-	-	-
	-0.505798	7.82776	-4.44242	0.000238231	0.0055761	0.256871	0	-0.685155	7.82776	-6.01771	6.32604e-06	0.000223713	3.72996	1	ILMN_1909886		ILMN_110737	NaN	9894372	BE612775		1710437	S	498	GGCTACATCTCATATGTGCTATGAGGACTTCTAGCCAGTGGGTGGCGCTG	-	99945876-99945925	0	0	0					-	-	-	-	-	-
	-0.475538	8.4532	-3.13387	0.00512552	0.0593723	-2.72926	0	-0.772121	8.4532	-5.08839	5.24557e-05	0.00129683	1.61055	1	ILMN_1838767		ILMN_111840	NaN	37547462	AY129027		5130706	S	3317	GGCGTACACATCACAACTTTAAACCCCGTCCGTACTGAAGCCTGCGTCCG	-	138626235-138626284	0	0	0	LOC401561	FP7915 protein	unknown	other	-	-	-	-	-	-
	-0.721603	8.9972	-4.69694	0.000130864	0.00343541	0.848172	1	-0.719796	8.9972	-4.68518	0.000134528	0.00282002	0.671586	1	ILMN_1894072		ILMN_115058	NaN	24124017	BU935198		3370037	S	520	CAGATGTTGTAGACCTAGCCCCACAGGACTGCATTTAGCTGCTTCAGTGA	+	106336182-106336231	0	0	0					-	-	-	-	-	-
	-0.644888	10.3125	-3.71337	0.0013317	0.0214282	-1.42919	1	-0.215882	10.3125	-1.24308	0.227891	0.630937	-6.29347	0	ILMN_1819608		ILMN_121109	NaN	7018527	AL157484		6860593	S	2125	CAGGAGTGAGGGATGGCTGGGAAGAATCTCCAGGTCTGTGGCCCTTGTGT	-	74648964-74649013	0	0	0	ARRB1	arrestin, beta 1	Cytoplasm	other	-	-	-	-	-	-
	-0.656235	8.75104	-4.29262	0.000339301	0.00734957	-0.0912948	1	-0.905232	8.75104	-5.92138	7.84278e-06	0.000270638	3.51417	1	ILMN_1823809		ILMN_124068	NaN	10437525	AK025082		4610184	S	2719	AGGCCCATTTCTGTACCTCTCCCCTCAGACTGTTAGCCACAGACCCTTAG	+	127453209-127453258	0	0	0					-	-	-	-	-	-
	-0.619865	8.40001	-3.44406	0.00250217	0.0344362	-2.04047	1	-0.234681	8.40001	-1.30392	0.206738	0.603882	-6.21876	0	ILMN_1875123		ILMN_124400	NaN	14430864	BI024234		4200753	S	205	GGTTGAGTTGTTACCGTTGAACTCACAGCCCACTGGACTAGAACACATGC			0	0	0					-	-	-	-	-	-
	-0.529455	8.79329	-3.7602	0.00119278	0.0196456	-1.32197	0	-0.652663	8.79329	-4.63523	0.000151283	0.00310859	0.554844	1	ILMN_1906187		ILMN_128287	NaN	21757111	AK097377		3990553	S	1119	TCTTAGTCCCACGTTCAGGTGAGAAGACCTCAAAGGTACCCTCTGTCCAG	+	12917097-12917146	0	0	0	LOC283070	hypothetical LOC283070	unknown	other	-	-	-	-	-	-
	-0.86494	9.04162	-3.3485	0.00312472	0.0406647	-2.25468	1	-0.67306	9.04162	-2.60566	0.016723	0.132594	-4.01934	0	ILMN_1861376		ILMN_74626	NaN	5262516	AL080095		2470730	S	1866	CATGACCAAAGTATCGCTTACTGACCATGCAGCTGTAAACCTTCTGTGCC			0	0	0					-	-	-	-	-	-
DHDH	0.890365	7.74619	4.31823	0.000319382	0.00701868	-0.0317824	1	-0.340609	7.74619	-1.65194	0.113808	0.449721	-5.73569	0	ILMN_1689200	DHDH	ILMN_7952	27294	126273597	NM_014475.3	NP_055290.1	6770630	S	1007	AAGGCCATTGGAGTCACCTTCCCCCAAGACAAACGCTGATGTATCCCCGA	+	54139964-54140002:54140003-54140013	0	0	0	DHDH	dihydrodiol dehydrogenase (dimeric)	unknown	enzyme	0.936841	0.0762389	1	-0.461475	0.401323	X
DNAJB9	0.620034	8.75393	4.70948	0.000127067	0.00336651	0.877279	1	0.158486	8.75393	1.20379	0.242412	0.64735	-6.3401	0	ILMN_1773742	DNAJB9	ILMN_14354	4189	9558754	NM_012328.1	NP_036460.1	2760164	S	2167	GGAGCAAGTGTTCCTGCTGCCAGTTCTTTCCTCTTTAGGCGTGGTTGAGA	+	108002326-108002375	0	0	0	DNAJB9	DnaJ (Hsp40) homolog, subfamily B, member 9	Nucleus	other	0.494554	0.218984	d	0.198646	0.668467	X
DCUN1D3	1.89045	8.54504	9.98734	2.56766e-09	7.20155e-07	11.5939	1	1.55608	8.54504	8.22085	6.43337e-08	5.29446e-06	8.34287	1	ILMN_1665455	DCUN1D3	ILMN_182838	123879	27735046	NM_173475.1	NP_775746.1	7560288	S	2785	GGAGCTCACTCTGGGCCTACCTGGTTTCAGTTAGAGGGTCCTCCTGTTAT	-	20777029-20777078	0	0	0	DCUN1D3	DCN1, defective in cullin neddylation 1, domain containing 3 (S. cerevisiae)	Cytoplasm	other	0.516158	0.104081	d	0.493897	0.121959	d
DPEP2	-0.873862	10.0203	-4.46095	0.000228045	0.0053842	0.299943	1	-2.73884	10.0203	-13.9814	6.15684e-12	2.93726e-09	17.5162	1	ILMN_1689160	DPEP2	ILMN_24146	64174	11641268	NM_022355.1	NP_071750.1	1820681	S	1552	GGCCACCTTCCCAGTCCTTATTCTGTGGCTCTGATGACCCAGTTAGTCCT	-	66578893-66578909:66578910-66578942	0	0	0	DPEP2	dipeptidase 2	Plasma Membrane	peptidase	-1.43326	0.0531393	1	-3.53409	0.000560984	2
DUS2L	-0.660775	8.485	-7.62846	2.07324e-07	2.20859e-05	7.25747	1	-0.39938	8.485	-4.61073	0.000160254	0.00326081	0.497577	0	ILMN_1811650	DUS2L	ILMN_16935	54920	34147639	NM_017803.3	NP_060273.1	1510630	S	1869	GGTGGTAACTCCCCAACCTGACATTGGTACTGTGCAATAAAGACACCCCC	+	66670628-66670677	0	0	0	DUS2L	dihydrouridine synthase 2-like, SMM1 homolog (S. cerevisiae)	Cytoplasm	other	-0.530152	0.116161	d	-0.489511	0.149438	X
AARS	-0.413095	11.1132	-2.78353	0.0113069	0.10581	-3.47911	0	-0.720552	11.1132	-4.85525	9.0305e-05	0.0020281	1.06849	1	ILMN_1662364	AARS	ILMN_29917	16	109148541	NM_001605.2	NP_001596.2	290603	S	3263	AGATAACGGCTCTCCAGACCTGAGCTTTCCGCGTCAGCAAGTAGGAATCG	-	68843829-68843878	0	0	0	AARS	alanyl-tRNA synthetase	Cytoplasm	enzyme	-0.133664	0.59292	X	-0.592953	0.016103	2
ECH1	-0.729698	10.4299	-3.99554	0.000684659	0.012753	-0.780064	1	-0.882787	10.4299	-4.8338	9.4952e-05	0.00211978	1.01848	1	ILMN_1653115	ECH1	ILMN_28288	1891	70995210	NM_001398.2	NP_001389.2	5360553	S	938	CATTCGGTGGCCGAGAGCCTCAACTACGTGGCGTCCTGGAACATGAGCAT	-	43998177-43998197:43998337-43998365	0	0	0	ECH1	enoyl CoA hydratase 1, peroxisomal	Cytoplasm	enzyme	-0.32513	0.182295	d	-0.585566	0.0233897	2
ABCA7	-0.357428	8.85695	-1.26172	0.221242	0.615998	-6.08785	0	-0.978571	8.85695	-3.45435	0.00244284	0.0302424	-2.18314	1	ILMN_1743205	ABCA7	ILMN_13614	10347	150417983	NM_019112.3	NP_061985.2	2570100	A	6473	ACGGCGTGGAGGACTTTTCCGTGAGCCAGACGATGCTGGAGGAGGTATTC	+	1016127-1016170:1016269-1016274	0	0	0	ABCA7	ATP-binding cassette, sub-family A (ABC1), member 7	Plasma Membrane	transporter	-0.102807	0.789306	X	-0.31263	0.347848	d
EIF2C2	0.932491	9.38598	3.30642	0.00344472	0.0439476	-2.34846	1	0.225574	9.38598	0.799841	0.432989	0.805762	-6.74098	0	ILMN_1695719	EIF2C2	ILMN_25413	27161	29171733	NM_012154.2	NP_036286.2	290468	S	3245	GGCCCCGTGTGTTTACAGCATTTCCAGGTCCAGAGAGGTTGGCAGACAAG	-	141610650-141610699	0	0	0	EIF2C2	eukaryotic translation initiation factor 2C, 2	Cytoplasm	translation regulator	0.723725	0.055778	1	0.126259	0.780755	X
ABCC4	-0.252817	7.73305	-3.18522	0.00455584	0.0544269	-2.61661	0	-0.687429	7.73305	-8.66087	2.7796e-08	2.68083e-06	9.18519	1	ILMN_1788457	ABCC4	ILMN_14001	10257	34452699	NM_005845.2	NP_005836.1	2450201	S	5313	GGTTTGAAGTGGAGTCTCATGACCTCTCAGAATAAGGTGTCACCTCCCTG	-	94470560-94470609	0	0	0	ABCC4 (includes EG:10257)	ATP-binding cassette, sub-family C (CFTR/MRP), member 4	Plasma Membrane	transporter	-0.495069	0.00558004	X	-0.80656	0.000297536	2
EIF4B	-0.608505	11.8648	-3.90155	0.000854785	0.0151857	-0.997033	1	-0.817394	11.8648	-5.24088	3.68557e-05	0.000969614	1.96334	1	ILMN_1655497	EIF4B	ILMN_21177	1975	148746207	NM_001417.4	NP_001408.2	5390494	S	3521	GATTAGGCCCTGTTCAGCCATGCAGGGGTGTTGGTTTATGCGTGCTGCAG	+	51721753-51721802	0	0	0	EIF4B	eukaryotic translation initiation factor 4B	Cytoplasm	translation regulator	-0.425887	0.218859	d	-0.325259	0.366695	d
EMR1	0.665829	8.14849	3.41029	0.00270683	0.0366635	-2.11634	1	0.646193	8.14849	3.30971	0.00341858	0.0395528	-2.5086	1	ILMN_1780601	EMR1	ILMN_12984	2015	40807488	NM_001974.3	NP_001965.3	2510356	S	2781	TCTCAGCTTAACATGGAAATGAGGATCCCACCAGCCCCAGAACCCTCTGG	+	6891122-6891171	0	0	0	EMR1	egf-like module containing, mucin-like, hormone receptor-like 1	Plasma Membrane	G-protein coupled receptor	0.940685	0.0506862	1	1.68869	0.0030674	2
EPSTI1	-1.35241	10.191	-3.38328	0.00288227	0.0384318	-2.17689	1	-0.56922	10.191	-1.424	0.169516	0.549099	-6.06253	0	ILMN_2388547	EPSTI1	ILMN_27754	94240	50428918	NM_033255.2	NP_150280.1	5700725	A	1287	GGGAGTCACTTGATGCTTTCAGGTTAATCAGAGCTATGGGTGCTACAGGC	-	42360293-42360342	0	0	0	EPSTI1	epithelial stromal interaction 1 (breast)	unknown	other	-1.44351	0.0828006	1	-0.574334	0.524259	X
ERCC2	-0.777093	8.08576	-6.53364	2.04005e-06	0.000133636	4.98277	1	-0.734184	8.08576	-6.17287	4.48551e-06	0.000169955	4.07533	1	ILMN_1815859	ERCC2	ILMN_21902	2068	40068510	NM_000400.2	NP_000391.1	4260435	S	2183	AAGTACTTCCTGCGGCAGATGGCACAGCCCTTCCACCGGGAGGATCAGCT	-	50546808-50546819:50547307-50547344	0	0	0	ERCC2	excision repair cross-complementing rodent repair deficiency, complementation group 2	Nucleus	enzyme	-0.372955	0.0645256	d	-0.230078	0.254131	d
FARSA	-0.61691	8.40402	-5.80599	1.016e-05	0.000460808	3.38441	1	-0.315906	8.40402	-2.97312	0.00739054	0.0722792	-3.24861	0	ILMN_1778255	FARSA	ILMN_30289	2193	126517492	NM_004461.2	NP_004452.1	2360167	S	1569	TGCGTGACATGGGCCACTCTAGGACAGGTCATCCTCCCCGAGTCCCTGCT	-	12894518-12894561:12894562-12894567	0	0	0	FARSA	phenylalanyl-tRNA synthetase, alpha subunit	Cytoplasm	enzyme	-0.78186	0.0518833	1	-0.306065	0.464897	X
FBXO32	0.721452	8.39461	4.11362	0.000517965	0.0102839	-0.506738	1	0.265326	8.39461	1.51285	0.145607	0.510593	-5.9397	0	ILMN_1703955	FBXO32	ILMN_3809	114907	22547143	NM_148177.1	NP_680482.1	1990079	A	967	GAAGGGTCCCCCTGCTGACTGGAGAGCTGGGAATATGGCATTTGGACACT	-	124584719-124584768	0	0	0	FBXO32	F-box protein 32	Cytoplasm	enzyme	1.25769	0.146392	1	0.845375	0.347788	X
FGD3	-0.983664	11.3207	-4.32797	0.000312125	0.00690182	-0.00916824	1	-0.489164	11.3207	-2.15224	0.0434801	0.256025	-4.89636	0	ILMN_1772686	FGD3	ILMN_6304	89846	134133264	NM_033086.2	NP_149077.2	5270619	S	3262	CTGAGTGGCAGGCGCATGAGATTTGTGGCTGTTCCTGATGCTAGTGGCAC	+	94838248-94838297	0	0	0	FGD3	FYVE, RhoGEF and PH domain containing 3	Cytoplasm	other	-0.502454	0.0833442	d	-0.35304	0.226213	X
FN3KRP	-0.692842	9.34975	-4.16405	0.000459759	0.0093566	-0.389787	1	-0.497358	9.34975	-2.98917	0.00712674	0.0704475	-3.21396	0	ILMN_1652333	FN3KRP	ILMN_14939	79672	20149679	NM_024619.2	NP_078895.2	4010021	S	1577	GGTACATCCAGGAGTCTTCATTGCTTCTGTTATTACCCCGTCTCCTCTGC	+	78278957-78279006	0	0	0	FN3KRP	fructosamine 3 kinase related protein	unknown	kinase	-0.471813	0.0771974	d	-0.774756	0.00893972	X
ABHD8	-0.52435	9.63512	-3.36839	0.00298376	0.0394296	-2.21023	0	0.732009	9.63512	4.70237	0.000129207	0.00273205	0.711735	1	ILMN_1712707	ABHD8	ILMN_23791	79575	145611433	NM_024527.4	NP_078803.4	4880288	S	2024	GGGGGGCTGGCGCCACCGAACCTGCACATCTCAACTTGTAACTCAATAAA	-	17263956-17264005	0	0	0	ABHD8	abhydrolase domain containing 8	unknown	enzyme	-0.247953	0.344474	X	0.34307	0.185219	d
FOXD2	0.629939	7.46626	4.94914	7.25268e-05	0.00215689	1.43223	1	0.910559	7.46626	7.15385	5.47742e-07	3.03071e-05	6.18979	1	ILMN_1789400	FOXD2	ILMN_29062	2306	134142823	NM_004474.3	NP_004465.3	510180	S	4509	GCGCGCTGCTCTCGGCGTTCTCTGTCCACTGGGTGTGCATTGATTTAAAC	+	47678784-47678833	0	0	0	FOXD2	forkhead box D2	Nucleus	transcription regulator	0.277364	0.26051	d	0.106763	0.710417	d
ABL1	0.426408	9.76468	2.39672	0.0261909	0.186648	-4.25902	0	0.649228	9.76468	3.64912	0.00154869	0.0208782	-1.73944	1	ILMN_1713732	ABL1	ILMN_4033	25	62362413	NM_005157.3	NP_005148.2	4180088	A	5257	CCTGTGGTGGCTCCCCCTCTGCTTCTCGGGGTCCAGTGCATTTTGTTTCT	+	132752752-132752801	0	0	1	ABL1	c-abl oncogene 1, non-receptor tyrosine kinase	Nucleus	kinase	0.369746	0.0361868	X	0.476549	0.0106046	2
FPR1	0.752428	8.15808	3.52988	0.0020479	0.0294726	-1.84679	1	1.92161	8.15808	9.01488	1.44094e-08	1.56616e-06	9.84382	1	ILMN_2092118	FPR1	ILMN_23433	2357	36951095	NM_002029.3	NP_002020.1	1030270	S	838	CAGCCTTTTTTCTCTGCTGGTCCCCATATCAGGTGGTGGCCCTTATAGCC	-	56941267-56941316	0	0	0	FPR1	formyl peptide receptor 1	Plasma Membrane	G-protein coupled receptor	1.1248	0.0522299	1	3.18277	0.000259228	2
GALK1	-0.803885	9.95049	-4.73322	0.000120184	0.00321382	0.932335	1	-0.999399	9.95049	-5.88439	8.52005e-06	0.000291377	3.43102	1	ILMN_1803194	GALK1	ILMN_18040	2584	4503894	NM_000154.1	NP_000145.1	3520278	S	1303	GTGCCCGGTGCCATCTTCCATATCCGGGTGCTCAATAAACTTGTGCCTCC	-	71265621-71265670	0	0	0	GALK1	galactokinase 1	Cytoplasm	kinase	-0.517736	0.0834622	d	-0.887295	0.00810481	2
GCH1	0.865661	8.38187	3.48376	0.00228089	0.0321109	-1.95102	1	0.997984	8.38187	4.01628	0.00065193	0.0103803	-0.89101	1	ILMN_1812759	GCH1	ILMN_14690	2643	66932971	NM_001024071.1	NP_001019242.1	240053	A	1209	CCCATCTCTGCCACTTTGATGCTATTTGGGTTATGATGGGGCAAGATGGC	-	54379051-54379100	0	0	0	GCH1	GTP cyclohydrolase 1	Cytoplasm	enzyme	0.602305	0.0726024	1	2.86124	2.82513e-05	2
GCH1	0.783093	7.56993	4.97759	6.78737e-05	0.00206636	1.49793	1	0.486049	7.56993	3.08948	0.00567303	0.0586061	-2.99591	0	ILMN_2335813	GCH1	ILMN_23648	2643	66932969	NM_001024070.1	NP_001019241.1	1010360	A	456	GCCTCGGCCATGCAGTTCTTCACCAAGGGCTACCAGGAGACCATCTCAGA	-	54401903-54401904:54438789-54438836	0	0	0	GCH1	GTP cyclohydrolase 1	Cytoplasm	enzyme	0.602305	0.0726024	1	2.86124	2.82513e-05	X
ACAT1	-0.450725	9.52374	-3.46782	0.0023673	0.0330083	-1.98695	0	-0.813548	9.52374	-6.25934	3.7081e-06	0.00014582	4.26659	1	ILMN_1800008	ACAT1	ILMN_164459	38	31563501	NM_000019.2	NP_000010.1	2070605	S	1237	TGGGATGTCTGGAGCCAGGATTGTTGGTCATTTGACTCATGCCTTGAAGC	+	107522294-107522296:107523207-107523253	0	0	1	ACAT1	acetyl-CoA acetyltransferase 1	Cytoplasm	enzyme	-0.495786	0.0389674	X	-0.654513	0.0103727	2
GCHFR	-0.651247	8.74924	-3.87249	0.000915439	0.0159897	-1.06397	1	-1.13715	8.74924	-6.76182	1.25017e-06	6.0109e-05	5.35973	1	ILMN_1694780	GCHFR	ILMN_22818	2644	6382072	NM_005258.2	NP_005249.1	5670475	S	406	TGACCTCCAAGCTCCTGCCTCACCGTCTGCCTTGCTCCTCTCTTCCCAAA	+	38846896-38846945	0	0	0	GCHFR	GTP cyclohydrolase I feedback regulator	Cytoplasm	other	-1.00482	0.0620493	1	-1.98638	0.00243911	2
ACO1	0.402578	10.7836	3.209	0.00431343	0.0522084	-2.56427	0	1.45476	10.7836	11.596	1.87573e-10	4.59997e-08	14.1675	1	ILMN_1750800	ACO1	ILMN_9544	48	8659554	NM_002197.1	NP_002188.1	2450608	S	3289	CCTTTTCCTTCAGAGTGAATCATCCAGACTCCTCATGGATAGGTCGGGTG	+	32440622-32440671	0	0	0	ACO1	aconitase 1, soluble	Cytoplasm	enzyme	0.552431	0.097052	X	1.56515	0.000687461	2
GEMIN4	-0.727911	8.94006	-4.66618	0.000140668	0.00364184	0.77678	1	-0.79594	8.94006	-5.10227	5.07929e-05	0.00126019	1.64273	1	ILMN_1770206	GEMIN4	ILMN_15971	50628	122939156	NM_015721.2	NP_056536.2	6450300	S	3348	GCTTCTTACCTGTGCGGGAGCGAAAAAGCTGGGCTTCAACATGGCAGGTC	-	594754-594803	0	0	0	GEMIN4	gem (nuclear organelle) associated protein 4	Nucleus	other	-0.269434	0.264926	d	-0.103619	0.713729	d
GIMAP6	-1.17322	8.89993	-5.29413	3.25972e-05	0.00116792	2.22549	1	-0.607062	8.89993	-2.73934	0.0124705	0.107202	-3.74423	0	ILMN_2329429	GIMAP6	ILMN_1865	474344	56119217	NM_001007224.1	NP_001007225.1	6330615	A	2426	GCCATCCCCCATCTTCCCTAGACACAGCAGACATCTGAGAAAGCTTCAGC	-	149954104-149954153	0	0	0	GIMAP6	GTPase, IMAP family member 6	unknown	other	-0.393549	0.0547349	d	-0.100155	0.665107	X
GLS	0.823385	8.46533	5.10651	5.02964e-05	0.00163094	1.79506	1	0.500879	8.46533	3.10637	0.00545828	0.0569542	-2.95893	0	ILMN_2188722	GLS	ILMN_2718	2744	21361451	NM_014905.2	NP_055720.2	5570427	S	4594	GTCTGGCAGGGACTGAATGACCTGATGTCAGATTTAGATTCTTCCTGGGG	+	191538326-191538375	1	0	0	GLS	glutaminase	Cytoplasm	enzyme	0.512723	0.0599363	d	0.190421	0.512553	X
GPX1	-0.777715	13.513	-4.12762	0.00050111	0.0100349	-0.474291	1	0.205752	13.513	1.092	0.287521	0.695315	-6.46558	0	ILMN_1749662	GPX1	ILMN_10376	2876	41406081	NM_201397.1	NP_958799.1	60647	A	885	CTACGCAGGTACAGCCGCCGCTTCCAGACCATTGACATCGAGCCTGACAT	-	49369861-49369910	0	0	0	GPX1 (includes EG:14775)	glutathione peroxidase 1	Cytoplasm	enzyme	-0.507475	0.0674569	d	0.288984	0.304337	X
GRAMD4	-1.03302	10.1745	-5.10714	5.02233e-05	0.00162965	1.79651	1	-1.67183	10.1745	-8.26533	5.90334e-08	4.9247e-06	8.42921	1	ILMN_1723706	GRAMD4	ILMN_12136	23151	67782363	NM_015124.2	NP_055939.1	6380112	S	3986	ATCGGCACGGGCTCTGGGCTCCCCGTGGAGAGAAGCTGTAGTTTTTACCA	+	45454022-45454071	0	0	0	GRAMD4	GRAM domain containing 4	unknown	other	-0.420508	0.0603304	d	-1.08932	0.00051896	2
HBP1	0.620953	9.53274	5.92011	7.86506e-06	0.000378905	3.63921	1	0.431479	9.53274	4.11368	0.000517885	0.00855869	-0.664167	0	ILMN_1685415	HBP1	ILMN_4225	26959	47834345	NM_012257.3	NP_036389.2	1940647	S	2350	AGGTGGCAGCAGCCATCCGTTATTATTTCCAATGGAGACCTAGCCCAGGC	+	106203582-106203631	0	0	0	HBP1	HMG-box transcription factor 1	Nucleus	transcription regulator	0.308714	0.194961	d	0.324036	0.177023	X
HERC4	0.636682	9.24549	4.30566	0.000329008	0.00718401	-0.060995	1	0.294928	9.24549	1.99449	0.0595895	0.311826	-5.17737	0	ILMN_1678922	HERC4	ILMN_8869	26091	145386556	NM_022079.2	NP_071362.1	3830040	A	3333	GTCATCCAGTCCACAGGAGGTGGTGAGGAGTATCTCCCAGTTTCCCATAC	-	69352796-69352845	0	0	0	HERC4	hect domain and RLD 4	unknown	enzyme	0.366146	0.102587	d	0.131376	0.603591	X
ACSS1	-0.334726	7.79877	-3.05056	0.00619941	0.0688068	-2.91064	0	-1.33493	7.79877	-12.166	7.91312e-11	2.23223e-08	15.0189	1	ILMN_1752269	ACSS1	ILMN_23106	84532	28416952	NM_032501.2	NP_115890.2	5220377	S	4192	AGTACCCACTCGGTCGTGGTTGTGCTGGCCTCTTGGGTGAGTGAACCTGT	-	24935104-24935153	0	0	0	ACSS1	acyl-CoA synthetase short-chain family member 1	Cytoplasm	enzyme	-0.580458	0.069869	X	-1.61446	0.000442692	2
ACTN1	-0.136419	11.0001	-0.787748	0.439873	0.801804	-6.56599	0	-0.586979	11.0001	-3.3895	0.00284091	0.0342073	-2.32953	1	ILMN_2232177	ACTN1	ILMN_28160	87	12025669	NM_001102.2	NP_001093.1	5080364	S	2979	GGCCCACGTGGCATCGATCCTCCCTGCCCGCGAAGTGACAGTTTACAAAA	-	68411162-68411211	0	0	1	ACTN1	actinin, alpha 1	Cytoplasm	other	-0.0106067	0.973818	X	-0.465857	0.0558373	d
HESX1	-0.718233	7.48417	-5.53952	1.85776e-05	0.0007451	2.78416	1	-0.261396	7.48417	-2.01607	0.0571092	0.303566	-5.13976	0	ILMN_1742929	HESX1	ILMN_23312	8820	4504366	NM_003865.1	NP_003856.1	7550242	S	530	CCCAGTGGGATTTCATTCCCTAGCGTGGTGGATCACCCAATGCCAGAAGA	-	57207932-57207981	0	0	0	HESX1	HESX homeobox 1	Nucleus	transcription regulator	-1.43793	0.0792659	1	-0.855208	0.306524	X
ACVR1	0.39041	9.45435	3.31274	0.00339473	0.0433804	-2.33441	0	0.851204	9.45435	7.22271	4.74832e-07	2.70961e-05	6.33347	1	ILMN_1760490	ACVR1	ILMN_21502	90	10862690	NM_001105.2	NP_001096.1	6940360	S	2711	TTCAGTTCATATGCAGAACGTATTTAGCCATTACCCACGTGACACCACCG	-	158301397-158301446	0	0	0	ACVR1	activin A receptor, type I	Plasma Membrane	kinase	0.496917	0.0763871	X	0.641039	0.0277101	2
HLA-DOA	-1.12945	8.94357	-3.3924	0.00282186	0.0378096	-2.15647	1	-2.05233	8.94357	-6.16436	4.57053e-06	0.00017264	4.05647	1	ILMN_1659075	HLA-DOA	ILMN_27857	3111	62912477	NM_002119.3	NP_002110.1	2470553	S	3188	GGCCAAACTTGGAGCAGGTGTCCATCCCAGCCCTGTGTAGTTAGAGCAGG	-	33080184-33080233	0	0	0	HLA-DOA	major histocompatibility complex, class II, DO alpha	Plasma Membrane	transmembrane receptor	-1.12329	0.084479	1	-2.34059	0.00299766	2
ACYP1	-0.451236	8.50292	-3.43994	0.00252629	0.0346997	-2.04973	0	-0.666897	8.50292	-5.084	5.29928e-05	0.00130666	1.60037	1	ILMN_1694233	ACYP1	ILMN_22509	97	45243543	NM_001107.3	NP_001098.1	5910148	A	248	GGTCCCATCTCCAAGGTGCGTCATATGCAGGAATGGCTTGAAACAAGAGG	-	74589990-74590039	0	0	0	ACYP1	acylphosphatase 1, erythrocyte (common) type	unknown	enzyme	-0.541568	0.0790135	X	-1.29135	0.00126444	2
ADA	-0.463498	11.8961	-3.17733	0.00463923	0.0551637	-2.63397	0	-0.795946	11.8961	-5.4563	2.24655e-05	0.000644919	2.4588	1	ILMN_1803686	ADA	ILMN_8067	100	47078294	NM_000022.2	NP_000013.2	7210192	S	1204	CAGGGCAGAACCTCTGAAGACGCCACTCCTCCAAGCCTTCACCCTGTGGA	-	42681855-42681888:42681889-42681902:42682354-42682355	0	1	0	ADA	adenosine deaminase	Cytoplasm	enzyme	-0.579861	0.0237921	X	-0.638881	0.0138758	2
ADAM10	-0.0759862	8.49231	-0.461364	0.649403	0.900948	-6.77334	0	0.781441	8.49231	4.74466	0.000117	0.00251979	0.810509	1	ILMN_1718946	ADAM10	ILMN_169204	102	73747882	NM_001110.2	NP_001101.1	5290300	S	3287	GAATGGTGGTATTCAGTGGTCCAGGATTCTGTAATGCTTTACACAGGCAG	-	56676392-56676441	0	0	0	ADAM10	ADAM metallopeptidase domain 10	Plasma Membrane	peptidase	-0.289532	0.381374	X	0.815368	0.0179163	2
HLA-DPB1	-0.653331	8.47433	-3.52411	0.00207568	0.0297732	-1.85983	1	-1.33579	8.47433	-7.20536	4.92206e-07	2.78985e-05	6.29732	1	ILMN_1749070	HLA-DPB1	ILMN_4641	3115	24797075	NM_002121.4	NP_002112.3	1050360	S	1277	CAGTGAGCTGCCCCCAAATCAAGTTTAGTGCCCTCATCCATTTATGTCTC	+	33162730-33162779	0	0	0	HLA-DPB1	major histocompatibility complex, class II, DP beta 1	Plasma Membrane	transmembrane receptor	-0.791602	0.0799473	1	-1.79938	0.00169952	2
ADAMDEC1	-0.202357	12.3131	-0.955908	0.350275	0.739017	-6.41936	0	0.882141	12.3131	4.16712	0.000456436	0.007729	-0.539519	1	ILMN_2103107	ADAMDEC1	ILMN_5537	27299	16753219	NM_014479.2	NP_055294.1	2470184	S	1922	CAGGTTTTATGTTATTCCTCTGTGTTCACTTCGCCTTGCTCTTGAAAGTG	+	24319218-24319267	0	0	0	ADAMDEC1	ADAM-like, decysin 1	Extracellular Space	peptidase	-0.0248082	0.966152	X	0.605416	0.14688	1
IL11RA	-1.03848	9.18347	-3.4912	0.00224159	0.0316534	-1.93422	1	-1.45711	9.18347	-4.89855	8.16155e-05	0.0018647	1.16936	1	ILMN_1664912	IL11RA	ILMN_3536	3590	22212920	NM_004512.3	NP_004503.1	2760148	I	1617	TGCATGTATGTAGGTGCCTGGGGAGTGTGTGTGGGTCCTTGGCTCTTGGC	+	34651778-34651827	0	0	0	IL11RA	interleukin 11 receptor, alpha	Plasma Membrane	transmembrane receptor	-0.0928439	0.666595	d	-0.276239	0.146638	d
ADARB1	-0.476474	9.4666	-2.6146	0.0164006	0.137192	-3.82685	0	1.0608	9.4666	5.82101	9.82255e-06	0.000324694	3.28825	1	ILMN_1679797	ADARB1	ILMN_30004	104	75709167	NM_001112.2	NP_001103.1	7330097	A	6758	TACACCACACGTTACAACTGCATGAGCTTCCTCTCGCACAAGACCAGCTG	+	45470779-45470828	0	0	0	ADARB1	adenosine deaminase, RNA-specific, B1	Nucleus	enzyme	-0.231154	0.429113	X	0.708988	0.0183816	2
ATP5H	0.511904	11.3458	2.51287	0.0204425	0.158129	-4.03108	0	0.812418	11.3458	3.98805	0.000696881	0.010939	-0.95664	1	ILMN_1794912	ATP5H	ILMN_29612	10476	51479151	NM_001003785.1	NP_001003785.1	3450743	A	275	GAGAAGAAGGTGAAATCTTGTGCTGAGTGGGTGTCTCTCTCAAAGGCCAG	-	70546920-70546961:70549871-70549878	0	0	0	ATP5H	ATP synthase, H+ transporting, mitochondrial Fo complex, subunit d	Cytoplasm	enzyme	-	-	-	-	-	-
ATP5H	0.494521	11.7846	2.31479	0.0311122	0.209062	-4.41618	0	0.712599	11.7846	3.33558	0.00321974	0.0377988	-2.45068	1	ILMN_1666372	ATP5H	ILMN_26187	10476	51479150	NM_006356.2	NP_006347.1	4290300	I	290	GCGCTGAAGGTTCCCGTGCCAGAGGATAAATATACTGCCCAGGTGGATGC	-	70547797-70547846	0	0	0	ATP5H	ATP synthase, H+ transporting, mitochondrial Fo complex, subunit d	Cytoplasm	enzyme	-	-	-	-	-	-
ADCK1	-0.408699	8.26578	-3.83285	0.00100514	0.0171811	-1.15518	0	-0.742725	8.26578	-6.96539	8.12366e-07	4.22324e-05	5.79333	1	ILMN_1698777	ADCK1	ILMN_24747	57143	40254937	NM_020421.2	NP_065154.2	7610328	S	1900	CCCCACTACTTCCGTTAACCCTTCCCATTGTCAAGATGTGCCACGGGTGC	+	77469764-77469813	0	0	0	ADCK1	aarF domain containing kinase 1	Cytoplasm	kinase	-0.268207	0.122165	X	-0.475825	0.0125974	2
IL13RA1	-0.674897	11.8272	-3.26729	0.003771	0.0472362	-2.43539	1	0.0779151	11.8272	0.3772	0.709908	0.925571	-6.99514	0	ILMN_1768505	IL13RA1	ILMN_15736	3597	26787975	NM_001560.2	NP_001551.1	1260341	S	3702	AGGTCTTGGGAGCTCTTGGAGGTGTCTGTATCAGTGGATTTCCCATCCCC	+	117812220-117812269	0	0	0	IL13RA1	interleukin 13 receptor, alpha 1	Plasma Membrane	transmembrane receptor	-0.242764	0.578104	d	0.25885	0.559077	X
IL1RN	2.72557	9.84859	3.60635	0.00171216	0.025885	-1.67328	1	2.38097	9.84859	3.1504	0.00493495	0.0525154	-2.86223	0	ILMN_1689734	IL1RN	ILMN_3867	3557	27894318	NM_173842.1	NP_776214.1	2470601	I	76	CAGAGGCCTCCGCAGTCACCTAATCACTCTCCTCCTCTTCCTGTTCCATT	+	113601684-113601733	0	0	0	IL1RN	interleukin 1 receptor antagonist	Extracellular Space	cytokine	1.62496	0.0633082	1	2.96983	0.00383407	X
ADHFE1	-0.478475	8.40003	-3.3515	0.00310305	0.0405231	-2.24798	0	-0.920134	8.40003	-6.44512	2.47134e-06	0.000104693	4.67444	1	ILMN_1702858	ADHFE1	ILMN_5010	137872	133922589	NM_144650.2	NP_653251.2	2760121	S	1651	CCAGGCTCGACTTCAGGGGTCAGTGTTCCTGTCCCAAACCCCACACAGAA	+	67543354-67543403	0	0	0	ADHFE1	alcohol dehydrogenase, iron containing, 1	Cytoplasm	enzyme	-0.158594	0.504588	X	-0.207637	0.372973	d
IL1RN	1.55362	11.1334	4.12621	0.000502778	0.0100601	-0.477551	1	2.51107	11.1334	6.66909	1.5242e-06	7.1181e-05	5.1604	1	ILMN_1774874	IL1RN	ILMN_8467	3557	27894320	NM_173843.1	NP_776215.1	7510386	A	1687	GGCACTTGGAGACTTGTATGAAAGATGGCTGTGCCTCTGCCTGTCTCCCC	+	113607829-113607878	0	0	0	IL1RN	interleukin 1 receptor antagonist	Extracellular Space	cytokine	1.62496	0.0633082	1	2.96983	0.00383407	2
ADO	-0.0334206	8.49573	-0.23303	0.818053	0.955525	-6.85509	0	0.598164	8.49573	4.17079	0.000452501	0.00766769	-0.53097	1	ILMN_1690352	ADO	ILMN_165903	84890	62177109	NM_032804.5	NP_116193.2	4480546	S	3523	CTTGCACCTGTGTGCATAAACTGTTAGTCGTGACTGACTTGGTGTGTTGC	+	64238044-64238093	0	0	0	ADO	2-aminoethanethiol (cysteamine) dioxygenase	Cytoplasm	other	-0.104158	0.80611	X	0.584499	0.0986494	d
ATP6V1G2	0.711599	7.24013	10.5466	1.00142e-09	3.46605e-07	12.5143	1	0.75608	7.24013	11.2059	3.44978e-10	7.72275e-08	13.5645	1	ILMN_1674778	ATP6V1G2	ILMN_18630	534	20357536	NM_130463.2	NP_569730.1	4560678	I	274	TCGGCCATAACAACAGAAATGGCCAGTCAGTCCCAAGGTATCCAGCAGCT	-	31649009-31649041:31649042-31649058	0	0	0	ATP6V1G2	ATPase, H+ transporting, lysosomal 13kDa, V1 subunit G2	Cytoplasm	transporter	-	-	-	-	-	-
INPP5D	-0.908453	9.04759	-7.02697	7.13821e-07	5.91442e-05	6.02812	1	-1.01572	9.04759	-7.85672	1.31346e-07	9.52447e-06	7.62573	1	ILMN_1744212	INPP5D	ILMN_3672	3635	64085176	NM_005541.3	NP_005532.2	3130609	A	4659	CCAGGGAGGGTGGGCCTCTTGGTTCCAGGCTCTTGAAATAGTGCAGCCTT			0	0	0	INPP5D	inositol polyphosphate-5-phosphatase, 145kDa	Cytoplasm	phosphatase	-0.202238	0.349159	d	-0.511334	0.0223857	2
ADRB2	-0.0582958	8.32208	-0.431057	0.670933	0.908117	-6.78724	0	-0.930038	8.32208	-6.87698	9.78962e-07	4.92669e-05	5.60569	1	ILMN_1695590	ADRB2	ILMN_2022	154	116686129	NM_000024.4	NP_000015.1	7570326	S	1895	CAGCTGTGAACATGGACTCTTCCCCCACTCCTCTTATTTGCTCACACGGG	+	148188243-148188292	0	1	0	ADRB2	adrenergic, beta-2-, receptor, surface	Plasma Membrane	G-protein coupled receptor	-0.153242	0.572827	X	-2.06708	3.34287e-05	2
INTS3	-0.69956	9.73398	-5.43601	2.35332e-05	0.000898643	2.54915	1	-0.460148	9.73398	-3.57563	0.00183995	0.0240025	-1.9075	0	ILMN_1756086	INTS3	ILMN_10054	65123	39995083	NM_023015.3	NP_075391.3	7200719	S	4174	GGGCATCTATGACGTGGTCAGGGTGTCCATTCCTAATCATGGGGCAGATG	+	152012871-152012920	0	0	0	INTS3	integrator complex subunit 3	Nucleus	other	-0.159307	0.327837	d	-0.0508473	0.798142	X
AFG3L2	-0.522575	10.0006	-2.99117	0.00709453	0.0758937	-3.03884	0	-0.734595	10.0006	-4.20476	0.000417591	0.00718593	-0.45167	1	ILMN_2066124	AFG3L2	ILMN_29564	10939	5802969	NM_006796.1	NP_006787.1	1170538	S	2820	TGTGGCAGGGATCGTTGCACTGGACTCTTGGCGTGTGGGAAGGGATGCTT	-	12319201-12319250	0	0	0	AFG3L2	AFG3 ATPase family gene 3-like 2 (S. cerevisiae)	Cytoplasm	peptidase	-0.676954	0.0139259	X	-1.00699	0.00153488	2
AGPAT2	-0.573747	8.66058	-3.62261	0.00164811	0.0252294	-1.6363	0	-0.652512	8.66058	-4.11993	0.0005103	0.00847352	-0.649613	1	ILMN_1732176	AGPAT2	ILMN_165995	10555	68835055	NM_006412.3	NP_006403.2	3520671	A	1184	TCTGGGAGCTGGGATGATAAAGATGAGGCTTGCGGCTGTGGCCCGCTGGT	-	138687730-138687779	0	0	0	AGPAT2	1-acylglycerol-3-phosphate O-acyltransferase 2 (lysophosphatidic acid acyltransferase, beta)	Cytoplasm	enzyme	-0.167338	0.432019	X	-0.171465	0.427848	d
AXUD1	2.46484	9.34934	9.81956	3.42976e-09	8.58356e-07	11.3101	1	1.9448	9.34934	7.74778	1.63173e-07	1.14578e-05	7.40762	1	ILMN_1703123	AXUD1	ILMN_181018	64651	17136074	NM_033027.2	NP_149016.1	7560041	S	3107	GGCCTTGCCAGCCTGTGTGCTTGTGGGAACACCTTGTACCTGAGCTTACA	-	39158376-39158425	0	0	1	CSRNP1	cysteine-serine-rich nuclear protein 1	Nucleus	transcription regulator	-	-	-	-	-	-
AGPAT5	0.19101	7.89379	1.70238	0.103827	0.426909	-5.47745	0	-0.677832	7.89379	-6.04116	6.00454e-06	0.000215308	3.78235	1	ILMN_1662049	AGPAT5	ILMN_9737	55326	61743951	NM_018361.2	NP_060831.2	830719	S	2396	TAGTGTGGTGGATTCCCACTGGGCTCTGGTCCTTCCCTTGGATCCCGTCA	+	6603306-6603355	0	0	0	AGPAT5	1-acylglycerol-3-phosphate O-acyltransferase 5 (lysophosphatidic acid acyltransferase, epsilon)	Cytoplasm	enzyme	0.151986	0.591414	X	-1.93218	5.89714e-05	2
KCNK4	0.784662	7.71297	7.6866	1.84447e-07	2.01232e-05	7.3736	1	0.0494645	7.71297	0.484557	0.633136	0.898033	-6.9474	0	ILMN_1801467	KCNK4	ILMN_1445	50801	15718768	NM_033311.1	NP_201568.1	4050187	I	168	TCTGTGGACAGTGCAGCTGGGGGCTTTATGGATCTTTGGGTGTGTAGGGG	+	63816874-63816923	0	0	0	KCNK4	potassium channel, subfamily K, member 4	Plasma Membrane	ion channel	0.123518	0.489197	d	0.125359	0.490692	X
AHCTF1	0.282484	7.95167	2.08029	0.0502642	0.283389	-4.84776	0	0.712055	7.95167	5.24379	3.66091e-05	0.000965729	1.97005	1	ILMN_1809139	AHCTF1	ILMN_164192	25909	67551264	NM_015446.3	NP_056261.3	1230196	I	8045	GACAGTGTGAAAGCAGTGCGAGTGCGGCCTTTTAGTCAGGTTAGTGATGG	-	245069444-245069493	0	0	0	AHCTF1	AT hook containing transcription factor 1	Nucleus	transcription regulator	0.563371	0.140967	X	1.22532	0.00572269	2
AHCTF1	0.335545	8.37035	2.70215	0.0135376	0.119859	-3.64791	0	0.729413	8.37035	5.87395	8.72163e-06	0.000295989	3.40755	1	ILMN_1747504	AHCTF1	ILMN_164192	25909	67551264	NM_015446.3	NP_056261.3	6040747	A	6300	GGACTCGGTCTAGCAAGGCCATCTTGTTGCCGGACCTTTCTGAACCAAAC	-	245079588-245079637	0	0	0	AHCTF1	AT hook containing transcription factor 1	Nucleus	transcription regulator	0.563371	0.140967	X	1.22532	0.00572269	2
KCNMB3	0.71066	7.8485	9.46063	6.44295e-09	1.44233e-06	10.6908	1	0.750399	7.8485	9.98967	2.55744e-09	3.87603e-07	11.5724	1	ILMN_1712197	KCNMB3	ILMN_26874	27094	25952101	NM_171829.1	NP_741980.1	6400703	A	1375	TGGCCTTCACTGACTCTGCTAGGTGGTGCCCTGATTGTTGGCATGGTGAG	-	180443530-180443579	0	0	0	KCNMB3	potassium large conductance calcium-activated channel, subfamily M beta member 3	Plasma Membrane	ion channel	0.716776	0.0602315	1	0.988344	0.0149412	2
AHNAK	-0.533117	12.158	-4.35191	0.000294964	0.00659709	0.0464831	0	-1.26447	12.158	-10.3221	1.45531e-09	2.47006e-07	12.1344	1	ILMN_1714567	AHNAK	ILMN_28759	79026	61743953	NM_001620.1	NP_001611.1	450553	I	18592	GCAAATTGTCCAACCCACCCCCTCAACATGAGGGGCTTCCATTTTCTGTG	-	62040123-62040172	0	0	0	AHNAK	AHNAK nucleoprotein	Nucleus	other	-0.522761	0.00356602	X	-0.837095	0.000204614	2
KCNN4	0.747357	8.43115	4.04868	0.000603886	0.0115527	-0.657159	1	0.520352	8.43115	2.81892	0.0104503	0.0939566	-3.57749	0	ILMN_1709937	KCNN4	ILMN_11994	3783	25777651	NM_002250.2	NP_002241.1	3610730	S	1806	TGGAGTGGGTTGGCTTGCTGATGGCTGCTGGAGGGGACGCTGGCTAAAGT	-	48962909-48962958	0	0	0	KCNN4	potassium intermediate/small conductance calcium-activated channel, subfamily N, member 4	Plasma Membrane	ion channel	0.678376	0.164909	1	1.34928	0.0121674	X
KIAA0664	-0.905942	8.50021	-4.40924	0.000257633	0.0059074	0.179731	1	-0.636831	8.50021	-3.09947	0.00554509	0.0576708	-2.97406	0	ILMN_1770719	KIAA0664	ILMN_43322	23277	87162454	NM_015229.3	NP_056044.3	7400711	S	4864	GACGTGATGTCGCTTCTCTGGTGCCCAGCTCCCTTCCTGGTCTGAGACTA	-	2539740-2539789	0	0	0	KIAA0664	KIAA0664	Cytoplasm	translation regulator	-0.329845	0.176234	d	-0.185701	0.478596	X
KLHL22	-0.730814	9.57297	-3.63735	0.00159209	0.0245722	-1.60273	1	-0.0238366	9.57297	-0.118637	0.906719	0.980786	-7.06164	0	ILMN_1705390	KLHL22	ILMN_17770	84861	24432025	NM_032775.2	NP_116164.2	5290259	S	2454	ATGCATCAGCTCGCCTGGGACTGGCTCTGTGATAAAAAGACCCCTCCCGC	-	19125870-19125919	0	0	0	KLHL22	kelch-like 22 (Drosophila)	unknown	other	-0.338535	0.0571918	d	-0.0620918	0.768697	X
LAMA5	1.87575	7.6279	11.2407	3.26482e-10	1.53202e-07	13.6039	1	0.0865833	7.6279	0.518865	0.60942	0.889158	-6.9297	0	ILMN_1773567	LAMA5	ILMN_12588	3911	21264601	NM_005560.3	NP_005551.3	4040176	S	11209	CCTTGTGCTCGCCTCATAGGTGTCTATTTGGACTCTAAGCTCTACGGGTG	-	60317683-60317732	0	0	0	LAMA5	laminin, alpha 5	Extracellular Space	other	0.432744	0.225979	d	0.0834442	0.855028	X
BAT2D1	0.609742	10.487	3.23516	0.00406112	0.0498092	-2.5065	1	-0.012923	10.487	-0.0685665	0.946	0.989002	-7.06652	0	ILMN_1743137	BAT2D1	ILMN_163969	23215	115298681	NM_015172.3	NP_055987.2	460711	S	9685	CAGAGCTGTGTCATGCCATCCTTTGGGCCCTCTGCTGGAAAAGTAGAATC	+	169828575-169828624	0	0	0	PRRC2C	proline-rich coiled-coil 2C	Cytoplasm	other	-	-	-	-	-	-
LITAF	0.838745	12.2889	4.42508	0.000248181	0.00574832	0.216554	1	-0.63929	12.2889	-3.37279	0.00295343	0.0352663	-2.36715	1	ILMN_1713934	LITAF	ILMN_7898	9516	65787264	NM_004862.2	NP_004853.2	3180672	S	1901	GCACATTTTGAGCATGTCTGGGTACCATGGTGCGGATGCTTGGGAACCAG	-	11549762-11549811	0	0	0	LITAF	lipopolysaccharide-induced TNF factor	Nucleus	transcription regulator	0.48009	0.141509	d	-0.775575	0.0245992	2
LPAR5	-0.763794	7.77829	-5.8258	9.7174e-06	0.000445704	3.42874	1	-0.262407	7.77829	-2.0015	0.0587741	0.309148	-5.16519	0	ILMN_2044453	LPAR5	ILMN_16181	57121	48675823	NM_020400.4	NP_065133.1	2260241	S	2672	GCTTGACCTCGTGGACTTCCTCAGAGGGTTGGTCCCTGGATCACACTTTG	-	6598385-6598434	0	0	0	LPAR5	lysophosphatidic acid receptor 5	Plasma Membrane	G-protein coupled receptor	-0.0387881	0.884639	d	-0.206837	0.345177	X
LRP10	0.743722	9.54895	6.73182	1.33278e-06	9.65023e-05	5.40663	1	1.2299	9.54895	11.1325	3.87519e-10	8.51878e-08	13.4492	1	ILMN_1670272	LRP10	ILMN_169863	26020	58530882	NM_014045.3	NP_054764.2	4760349	S	3056	AAGCACCGGAATGCCAATTAACTAGAGACCCTCCAGCCCCCAAGGGGAGG	+	22416937-22416986	0	0	0	LRP10	low density lipoprotein receptor-related protein 10	Plasma Membrane	transmembrane receptor	0.411345	0.0508562	d	1.03726	0.000465814	2
AKAP7	0.243835	8.1733	1.58368	0.128599	0.47718	-5.65604	0	1.94234	8.1733	12.6153	4.09564e-11	1.32368e-08	15.6663	1	ILMN_1733690	AKAP7	ILMN_22152	9465	20336197	NM_004842.2	NP_004833.1	5340504	A	1951	AAGCTCCAGGTCTTATCGTATCCCTTGCCATCTGAACTTGTTTGCACTGC	+	131646060-131646109	0	0	0	AKAP7	A kinase (PRKA) anchor protein 7	Plasma Membrane	other	0.281378	0.345717	X	1.40906	0.000604256	2
LRP3	0.71982	9.03405	5.20296	4.02293e-05	0.0013698	2.01665	1	0.948016	9.03405	6.85239	1.03129e-06	5.15137e-05	5.55332	1	ILMN_2127605	LRP3	ILMN_12327	4037	4505014	NM_002333.1	NP_002324.1	730458	S	2552	CTGGTGACCGCCACAGCCCCGCTTTGTAACCAGGGAATACACAGTCATTT	+	38390358-38390383	0	0	0	LRP3	low density lipoprotein receptor-related protein 3	Plasma Membrane	transmembrane receptor	0.265396	0.326382	d	0.825777	0.00660746	2
AKR1A1	-0.533805	11.9968	-3.76483	0.00117984	0.0194852	-1.31136	0	-0.651035	11.9968	-4.59163	0.000167618	0.00339424	0.452924	1	ILMN_1728047	AKR1A1	ILMN_18164	10327	24497575	NM_006066.2	NP_006057.1	1500504	A	1206	ATCTTGCTCAGGTGGCAGGTCCAGCGGAAAGTGATCTGCATCCCCAAAAG	+	45806933-45806943:45807186-45807224	0	0	0	AKR1A1	aldo-keto reductase family 1, member A1 (aldehyde reductase)	Cytoplasm	enzyme	-0.292315	0.15121	X	-0.581412	0.0103232	2
LSS	0.723623	9.65566	4.23476	0.000389007	0.00821832	-0.225683	1	0.181577	9.65566	1.06262	0.300334	0.707276	-6.49676	0	ILMN_1715024	LSS	ILMN_30260	4047	47933394	NM_002340.3	NP_002331.3	6450154	I	3850	TGCAGGGCTTGGTCAGCTGCCTGTTCAGTGTCAACACTTCCCTGCACATC	-	46433777-46433826	0	0	0	LSS	lanosterol synthase (2,3-oxidosqualene-lanosterol cyclase)	Cytoplasm	enzyme	0.585245	0.0724113	1	0.584761	0.0729403	X
LUZP1	0.615781	9.48301	6.94036	8.56346e-07	6.82866e-05	5.84696	1	-0.256943	9.48301	-2.89596	0.00879475	0.082634	-3.41407	0	ILMN_1714159	LUZP1	ILMN_2667	7798	53729364	NM_033631.2	NP_361013.2	3870484	S	7439	TGGAGCTGCCTGTCTGCATGTATCCTCTGGCGCGAATGCTCTCTGTTGGC	-	23284088-23284137	0	0	0	LUZP1	leucine zipper protein 1	Nucleus	other	0.317866	0.121412	d	-0.201166	0.344932	X
MAPRE3	0.701788	7.95024	4.12479	0.000504463	0.0100831	-0.480832	1	0.578746	7.95024	3.40161	0.00276204	0.033406	-2.30225	0	ILMN_1734290	MAPRE3	ILMN_1035	22924	10800411	NM_012326.2	NP_036458.2	6220026	S	1698	ACTCCCTCCAGCAGCCTGGTTCACCACACAAACTCTGCCTGGACCCCATT	+	27103419-27103468	0	0	0	MAPRE3	microtubule-associated protein, RP/EB family, member 3	Cytoplasm	enzyme	0.00270778	0.990476	d	0.109397	0.537412	X
ALCAM	0.331072	9.43238	1.38607	0.180645	0.560556	-5.9306	0	0.777442	9.43238	3.25484	0.00388092	0.0437709	-2.63103	1	ILMN_1670870	ALCAM	ILMN_164638	214	68163410	NM_001627.2	NP_001618.2	2070575	S	4391	GCTGTCAGAACCTCGAGAGCAGAACATGAGAAACTCAGAGCTCTGGACCG	+	106778084-106778133	0	0	0	ALCAM	activated leukocyte cell adhesion molecule	Plasma Membrane	other	0.190779	0.630031	X	0.694796	0.055086	1
ALDH1A1	-0.245028	8.05165	-1.3728	0.184672	0.566879	-5.94797	0	-1.05018	8.05165	-5.88379	8.53144e-06	0.000291562	3.42968	1	ILMN_2096372	ALDH1A1	ILMN_177898	216	25777722	NM_000689.3	NP_000680.2	1070477	S	1720	AGCTTCTTCTGAAAGAATTATTTGCCTTCTGAAATGTGACCCCCAAGTCC	-	74705733-74705782	0	0	0	ALDH1A1	aldehyde dehydrogenase 1 family, member A1	Cytoplasm	enzyme	-0.532645	0.295977	X	-4.03484	3.89222e-05	2
BEAN	0.183405	7.31338	1.59746	0.12549	0.471706	-5.63582	0	2.21643	7.31338	19.3051	1.31096e-14	2.2849e-11	23.3461	1	ILMN_1733066	BEAN	ILMN_32563	146227	89040471	XM_375359.2	XP_375359.2	5220692	A	2313	CGGAGCTGAAAGGAATCCACCCAGAAGTTCTGTAGCATCCTGCGTGCAGC	+	65073833-65073882	0	0	0	BEAN1	brain expressed, associated with NEDD4, 1	unknown	other	-	-	-	-	-	-
BHLHB2	1.65473	10.8183	8.35663	4.95226e-08	7.08739e-06	8.67774	1	0.415585	10.8183	2.09877	0.0484369	0.274352	-4.99317	0	ILMN_1768534	BHLHB2	ILMN_24095	8553	4503298	NM_003670.1	NP_003661.1	2640735	S	2510	GGTCCAGAGTACTTGTTTTCCCGATGTGTCCAGCCAGCTCCGCAGCAGCT	+	5001452-5001501	0	1	1	BHLHE40	basic helix-loop-helix family, member e40	Nucleus	transcription regulator	-	-	-	-	-	-
BHLHB3	0.0736258	8.03932	0.34271	0.735312	0.930981	-6.82246	0	0.969782	8.03932	4.5141	0.000201192	0.00394796	0.271594	1	ILMN_1726809	BHLHB3	ILMN_21793	79365	13540520	NM_030762.1	NP_110389.1	2900220	S	3531	CCAATCTCTTGCAAGCCTCCAGGCTCTGGCTTTGTCTACCTGCTCGTTCC	-	26164268-26164317	0	0	0	BHLHE41	basic helix-loop-helix family, member e41	Nucleus	transcription regulator	-	-	-	-	-	-
ALDH1A1	-0.296179	10.9452	-0.985526	0.335875	0.726844	-6.39084	0	-3.3132	10.9452	-11.0246	4.60331e-10	9.72513e-08	13.2785	1	ILMN_1709348	ALDH1A1	ILMN_24215	216	25777722	NM_000689.3	NP_000680.2	6510754	S	1394	GCAGGCAGGAACAGTGTGGGTGAATTGCTATGGCGTGGTAAGTGCCCAGT	-	74710736-74710768:74714338-74714354	0	0	0	ALDH1A1	aldehyde dehydrogenase 1 family, member A1	Cytoplasm	enzyme	-0.532645	0.295977	X	-4.03484	3.89222e-05	2
ALDH1A3	0.146938	7.11606	0.878486	0.389878	0.769421	-6.49013	0	0.691422	7.11606	4.13375	0.000493897	0.00824322	-0.617377	1	ILMN_2139970	ALDH1A3	ILMN_25111	220	4502040	NM_000693.1	NP_000684.1	4920148	S	3364	TAGGCCTGGGAATTCCGATCCTAGCTGCAGATCGCATCCCACAATGCGAG	+	99274274-99274323	0	0	0	ALDH1A3	aldehyde dehydrogenase 1 family, member A3	Cytoplasm	enzyme	0.240085	0.298404	X	0.257262	0.270116	d
MAT2A	-1.12914	12.0016	-5.0562	5.65278e-05	0.00178902	1.67924	1	-1.27693	12.0016	-5.718	1.239e-05	0.000393656	3.05529	1	ILMN_1737298	MAT2A	ILMN_25630	4144	46852159	NM_005911.4	NP_005902.1	7150176	S	2619	TGGTGCGGCTGGCCATGGAGAAAGCTGACTTGGCTGGTGTGGTACAGAGA	+	85625714-85625763	0	0	0	MAT2A	methionine adenosyltransferase II, alpha	Cytoplasm	enzyme	-0.132111	0.774547	d	-0.25005	0.5581	d
MBP	-1.39293	11.2782	-6.50182	2.18538e-06	0.000140658	4.91425	1	-0.610183	11.2782	-2.84817	0.00978942	0.0893814	-3.51566	0	ILMN_1672660	MBP	ILMN_10370	4155	68509937	NM_001025100.1	NP_001020271.1	3780681	I	4616	CTGCTCACTGTGTCCTTCTGTGGTCTCAGGAGCTGCAGTTGTTGCTGTTG	-	72853950-72853999	0	0	0	MBP	myelin basic protein	Extracellular Space	other	-0.139882	0.51456	d	-0.246306	0.226563	X
MFSD3	-0.598585	9.22787	-3.58312	0.00180794	0.0269572	-1.72607	1	-0.505897	9.22787	-3.02829	0.00652144	0.0655934	-3.12924	0	ILMN_1718972	MFSD3	ILMN_22771	113655	19923956	NM_138431.1	NP_612440.1	1510703	S	1338	GCTCCTGCTCATCCTCTCTGCCTTTCCCGTTCTGTACCTGGACCTAGCAC	+	145707289-145707338	0	0	0	MFSD3	major facilitator superfamily domain containing 3	unknown	other	-0.453007	0.189544	d	-0.300242	0.409078	X
MID1	0.8476	7.55364	8.72277	2.47506e-08	4.15078e-06	9.36385	1	-0.260359	7.55364	-2.6794	0.0142323	0.118264	-3.86841	0	ILMN_1761858	MID1	ILMN_4277	4281	148833497	NM_033290.2	NP_150632.1	2070408	A	3113	TTCCCGCTCCCCCATATCAATTTTCCTTTTGTCTCCGGGGCTGAGTAAAT	-	10376442-10376491	0	0	0	MID1 (includes EG:100330952)	midline 1 (Opitz/BBB syndrome)	Nucleus	other	0.16462	0.3372	d	-0.0627228	0.756271	X
ALDH7A1	-0.121501	8.12002	-0.844725	0.408032	0.781674	-6.51926	0	-0.997855	8.12002	-6.93748	8.61544e-07	4.43982e-05	5.73421	1	ILMN_1687508	ALDH7A1	ILMN_11622	501	66348118	NM_001182.2	NP_001173.1	70102	I	1772	GACTGTGACAGTGACTAATCCCCCTATGACCCCAAAGCCCTGATTAAATC	-	125908404-125908453	0	0	0	ALDH7A1	aldehyde dehydrogenase 7 family, member A1	Cytoplasm	enzyme	-0.076547	0.777612	X	-0.401531	0.0799267	d
ALDH7A1	-0.0765972	8.04782	-0.627409	0.537329	0.852523	-6.68089	0	-0.990049	8.04782	-8.1095	7.98752e-08	6.36939e-06	8.12552	1	ILMN_1763461	ALDH7A1	ILMN_11622	501	66348118	NM_001182.2	NP_001173.1	4150544	A	1442	GGGCAGAATCTTTCGCTGGCTTGGACCTAAAGGATCAGACTGTGGCATTG	-	125913567-125913593:125913787-125913809	0	0	0	ALDH7A1	aldehyde dehydrogenase 7 family, member A1	Cytoplasm	enzyme	-0.076547	0.777612	X	-0.401531	0.0799267	d
ALG3	-0.446247	9.27048	-4.45782	0.000229737	0.00541625	0.292654	0	-0.627915	9.27048	-6.2726	3.60172e-06	0.000142787	4.29584	1	ILMN_1711886	ALG3	ILMN_21968	10195	55743084	NM_005787.4	NP_005778.1	2650167	A	1287	CCCGCAGCCTTTCCCCAAGAGCACCCAACACAGCAAGAAAGCCCACTGAA	-	185442994-185442995:185442996-185443043	0	0	0	ALG3	asparagine-linked glycosylation 3, alpha-1,3- mannosyltransferase homolog (S. cerevisiae)	Cytoplasm	enzyme	-0.285487	0.240189	X	-0.494857	0.0462805	2
MRPL2	0.745304	7.96524	4.1862	0.000436312	0.00900334	-0.338403	1	0.551312	7.96524	3.09659	0.00558165	0.0579319	-2.98035	0	ILMN_1763264	MRPL2	ILMN_163428	51069	41872659	NM_015950.3	NP_057034.2	6420296	S	876	TCATAACAAACGGGTCATTGGCAAGGCAGGTCGCAACCGCTGGCTGGGCA	-	43130105-43130154	0	0	0	MRPL2	mitochondrial ribosomal protein L2	Extracellular Space	other	0.244543	0.377124	d	0.679233	0.0184297	X
ALOX5AP	0.4192	10.7648	0.727849	0.474952	0.819958	-6.61181	0	3.14216	10.7648	5.45567	2.24977e-05	0.000645462	2.45737	1	ILMN_1797875	ALOX5AP	ILMN_3192	241	15718674	NM_001629.2	NP_001620.2	3930343	S	664	TCTATTGGCCATCTGGGCTTCACAGCTTGAGTTAACCTTGCTTTTCCGGG	+	30236347-30236396	0	0	1	ALOX5AP	arachidonate 5-lipoxygenase-activating protein	Plasma Membrane	other	0.592613	0.502674	X	3.73348	0.000900247	2
BNIP3	2.82218	9.3387	12.6034	4.16672e-11	3.08097e-08	15.5859	1	0.249198	9.3387	1.11287	0.278664	0.686832	-6.44297	0	ILMN_1724658	BNIP3	ILMN_3871	664	7669480	NM_004052.2	NP_004043.2	6770608	S	1351	CACCCTGGATGATCAGTTTTCTGCTGAAGGCACCTACTCAGTATCTTTTC	-	133631327-133631376	0	1	0	BNIP3	BCL2/adenovirus E1B 19kDa interacting protein 3	Cytoplasm	other	-	-	-	-	-	-
AMDHD2	-0.571823	9.44856	-3.04835	0.00623067	0.0690595	-2.91543	0	-1.64398	9.44856	-8.76394	2.29185e-08	2.28726e-06	9.37869	1	ILMN_1695759	AMDHD2	ILMN_26534	51005	21361512	NM_015944.2	NP_057028.2	6110280	S	1270	GTGGTGCTCGACGACTCCCTTCACGTCCAGGCCACCTACATCTCGGGTGA	+	2519482-2519531	0	0	0	AMDHD2	amidohydrolase domain containing 2	unknown	enzyme	-0.0807584	0.74786	X	-0.954118	0.000908423	2
MRPL37	-0.653849	10.5604	-4.66396	0.000141404	0.00365673	0.771619	1	-0.235516	10.5604	-1.67995	0.108169	0.438369	-5.69294	0	ILMN_2041327	MRPL37	ILMN_11351	51253	22547133	NM_016491.2	NP_057575.2	6370196	S	1420	AGCCTCAGTGCCCGTTTGGCCTGCTGCTCTCGCTGACAATAAAGAGCCCT	+	54456581-54456630	0	0	0	MRPL37 (includes EG:51253)	mitochondrial ribosomal protein L37	Cytoplasm	enzyme	-0.391939	0.073438	d	-0.464661	0.0378526	X
MRPS12	-1.19528	10.2783	-10.2971	1.51757e-09	4.93735e-07	12.1085	1	-0.465655	10.2783	-4.01153	0.000659282	0.0104632	-0.902051	0	ILMN_2371964	MRPS12	ILMN_17557	6183	16950590	NM_033363.1	NP_203527.1	1850370	A	912	CACTGTACTGCCCTCTGCTGGGAAGGGGTTTTAATAAACAGACCCTGGCG	+	44115438-44115487	0	0	0	MRPS12	mitochondrial ribosomal protein S12	Cytoplasm	other	-0.391503	0.0533393	d	-0.1698	0.417033	X
AMPD3	0.26266	7.84204	1.10362	0.282567	0.682406	-6.26936	0	0.774709	7.84204	3.2551	0.00387863	0.0437552	-2.63046	1	ILMN_1665307	AMPD3	ILMN_13634	272	70906425	NM_001025389.1	NP_001020560.1	2810072	I	207	CCTGCTTGGTTTTAGAGGATTGCTCCTGTGGGTCACTTGAGGCAGGCTCC	+	10433448-10433497	0	0	0	AMPD3	adenosine monophosphate deaminase 3	Cytoplasm	enzyme	0.988356	0.00165374	X	1.27368	0.000284025	2
AMT	-0.0915503	8.60765	-0.652193	0.521535	0.844626	-6.66475	0	1.11781	8.60765	7.96314	1.0642e-07	7.95971e-06	7.83722	1	ILMN_1665331	AMT	ILMN_11202	275	44662837	NM_000481.2	NP_000472.2	940450	S	1942	CCATGGCAGACTCACCACCTATTCTGAGTTCCAGGGCTGCTGTAGGGCAG	-	49429326-49429375	0	0	0	AMT	aminomethyltransferase	Cytoplasm	enzyme	-0.104206	0.655269	X	1.05237	0.000440953	2
AMZ2	-0.177541	10.069	-2.74425	0.0123359	0.112526	-3.56086	0	-0.618009	10.069	-9.55256	5.47408e-09	7.06735e-07	10.8124	1	ILMN_1801606	AMZ2	ILMN_29189	51321	75812967	NM_001033569.1	NP_001028741.1	510328	A	996	CGGCGCCCTCTAAACCTTTGCCCTATCTGTTTGCACAAGTTGCAGTGTGC	+	63763532-63763581	0	0	0	AMZ2	archaelysin family metallopeptidase 2	unknown	other	-0.407767	0.16044	X	-0.514579	0.0803007	d
MS4A6A	-1.73133	11.3102	-4.45501	0.000231265	0.00543912	0.286122	1	-2.91671	11.3102	-7.5052	2.6605e-07	1.6928e-05	6.91608	1	ILMN_1797731	MS4A6A	ILMN_2009	64231	23238233	NM_022349.2	NP_071744.2	2260129	I	1191	GCTATGAGTTTGTGCCTTTGCTGAGGACACTAGAACCTGGCTTGCCTCCC	-	59696725-59696774	0	0	0	MS4A6A	membrane-spanning 4-domains, subfamily A, member 6A	unknown	other	-0.754376	0.164725	1	-3.24173	0.000198351	2
MUC1	0.994272	7.94623	4.74831	0.000116005	0.00313083	0.967331	1	1.45192	7.94623	6.9339	8.68087e-07	4.46411e-05	5.7266	1	ILMN_1756992	MUC1	ILMN_162388	4582	113206025	NM_001044391.1	NP_001037856.1	7650026	A	779	TAGCGGGGATCCTGAACTGGACTGAATAAAACGTGGTCTCCCACTGCGCC	-	153424925-153424974	0	0	0	MUC1	mucin 1, cell surface associated	Plasma Membrane	other	0.312374	0.132398	d	0.144506	0.524154	d
NANOS3	0.803562	7.50605	8.2106	6.56239e-08	8.89605e-06	8.39888	1	0.314939	7.50605	3.21796	0.00422529	0.0466666	-2.71294	0	ILMN_1804007	NANOS3	ILMN_309162	342977	148886759	NM_001098622.1	NP_001092092.1	6220373	A	869	CTTTGTGCCATCTGCCGTTTCCCTAGTGCTGGGCATCCAGTCAGCCCTCA	+	13852494-13852543	0	0	0	NANOS3	nanos homolog 3 (Drosophila)	unknown	other	0.124187	0.58211	d	0.12081	0.60446	X
ANKDD1A	0.0245977	8.2947	0.192445	0.849291	0.963896	-6.86404	0	0.671513	8.2947	5.25371	3.57805e-05	0.000947455	1.99295	1	ILMN_1813139	ANKDD1A	ILMN_6117	348094	96975022	NM_182703.3	NP_874362.3	5890564	S	2807	TCGGGGAAACTGTGTGTGCTGAAGAGTACGTGGGAGCTCTCTGTGCTATC	+	63037789-63037838	0	0	0	ANKDD1A	ankyrin repeat and death domain containing 1A	unknown	other	0.0233549	0.951254	X	0.412141	0.140789	d
NAPRT1	-1.28982	10.0846	-6.63108	1.65371e-06	0.000112873	5.19182	1	-1.51081	10.0846	-7.76723	1.56955e-07	1.11011e-05	7.44668	1	ILMN_1710752	NAPRT1	ILMN_175645	93100	40255088	NM_145201.3	NP_660202.2	3360131	S	1796	TCCCCCTGAGACTCGGAGCGGGGCTGACTGGAAACAACACGAATCACTCA	-	144728109-144728158	0	0	0	NAPRT1	nicotinate phosphoribosyltransferase domain containing 1	Cytoplasm	enzyme	-0.798664	0.0510006	1	-1.41114	0.00337068	2
NAV1	0.736949	8.22362	3.37394	0.00294553	0.0390831	-2.19781	1	0.229772	8.22362	1.05196	0.305083	0.711011	-6.50789	0	ILMN_1703374	NAV1	ILMN_30128	89796	27262621	NM_020443.2	NP_065176.2	940685	S	10919	GGACCCGGCAATCCACGTTTTAATAAGCCCTCCTGGTGATTCTGATGCAC	+	200060630-200060679	0	0	0	NAV1	neuron navigator 1	Cytoplasm	enzyme	0.719641	0.148117	1	0.33797	0.537412	X
NDUFB10	-0.600896	9.54048	-4.04931	0.000602985	0.0115399	-0.655696	1	-0.252592	9.54048	-1.70216	0.103868	0.42939	-5.65865	0	ILMN_1811754	NDUFB10	ILMN_6518	4716	4758773	NM_004548.1	NP_004539.1	1820482	S	561	CAGAGGCAGAGGATGCTGCAAGAGAGAAAAGCTGCAAAAGAGGCCGCCGC	+	1951843-1951892	0	0	0	NDUFB10	NADH dehydrogenase (ubiquinone) 1 beta subcomplex, 10, 22kDa	Cytoplasm	enzyme	-0.4829	0.0511741	d	-0.532961	0.0333969	X
ANKRD22	0.354518	7.25842	3.34212	0.00317127	0.0411408	-2.26891	0	0.612057	7.25842	5.77	1.10178e-05	0.000357032	3.17303	1	ILMN_1799848	ANKRD22	ILMN_7804	118932	154091031	NM_144590.2	NP_653191.2	130181	S	822	CCTCTGCTCTTGGAAGCCCGTGCAGACCCCACAATAAAGAATAAGCATGG	-	90572750-90572755:90573017-90573060	0	0	0	ANKRD22	ankyrin repeat domain 22	Nucleus	transcription regulator	1.02029	0.0422131	X	2.17205	0.000908423	2
ANKRD33	-0.327368	11.0234	-1.22549	0.234307	0.631817	-6.1313	0	-0.877009	11.0234	-3.28305	0.00363608	0.0415862	-2.56816	1	ILMN_1667748	ANKRD33	ILMN_18253	341405	40255267	NM_182608.2	NP_872414.2	4860707	S	1654	GAGTGCCTCCGGCCTCCCCATCCACCTCTGCCTAAGTAAATCTGCTCTCA	+	50571424-50571473	0	0	0	ANKRD33	ankyrin repeat domain 33	Nucleus	transcription regulator	-0.038889	0.809446	X	-0.0214168	0.902829	d
ANKRD34A	0.0806476	7.28329	0.661719	0.515533	0.840764	-6.65839	0	0.666738	7.28329	5.47064	2.17407e-05	0.000626323	2.49165	1	ILMN_2119793	ANKRD34A	ILMN_39476	284615	122939137	NM_001039888.2	NP_001034977.1	1090142	S	3465	GTCTCATTTTCCCAGGGGGTGGGTCATGGGCTCTAAGCTGCTCTTCTGTC	+	144186857-144186906	0	0	0	ANKRD34A	ankyrin repeat domain 34A	unknown	other	0.534365	0.189514	X	1.24261	0.00727536	2
ANKRD46	0.507972	8.32072	3.36509	0.00300668	0.0395879	-2.2176	0	0.687279	8.32072	4.55292	0.000183611	0.00365588	0.362392	1	ILMN_1712298	ANKRD46	ILMN_9031	157567	50053931	NM_198401.2	NP_940683.1	2750598	S	2442	CCTGAGTAACTGGCTGCTTCAGGATCAGCTTGCAGAGTCTTGCTTTTAGG	-	101602463-101602512	0	0	0	ANKRD46	ankyrin repeat domain 46	Nucleus	transcription regulator	0.3926	0.137086	X	0.817129	0.00677547	2
ANKRD9	0.46616	9.56571	2.27823	0.0335728	0.219304	-4.48531	0	-0.877729	9.56571	-4.28965	0.000341687	0.00609244	-0.253326	1	ILMN_2048607	ANKRD9	ILMN_18729	122416	50355986	NM_152326.2	NP_689539.1	7050370	S	1537	ACTGGCAAAGGCTAGGCCCGGAGCACCCTAGGCGCTGGATTTTGGGACAA	-	102042990-102043025:102043026-102043039	0	0	0	ANKRD9	ankyrin repeat domain 9	unknown	other	0.415709	0.0963949	X	-0.81513	0.00512907	2
NDUFB7	-0.857843	10.4229	-5.55326	1.80048e-05	0.000726775	2.8153	1	-0.978465	10.4229	-6.33412	3.1477e-06	0.000127758	4.43126	1	ILMN_1813604	NDUFB7	ILMN_6301	4713	33519471	NM_004146.4	NP_004137.2	6290296	S	315	AAGCAGGAGCGGCACGACTGGGACTACTGCGAGCACCGCGACTATGTGAT	-	14538068-14538077:14538577-14538616	0	0	0	NDUFB7	NADH dehydrogenase (ubiquinone) 1 beta subcomplex, 7, 18kDa	Cytoplasm	enzyme	-0.298366	0.103516	d	-0.327201	0.0771979	d
NMRAL1	-0.793013	9.66666	-5.37481	2.70774e-05	0.00100642	2.40976	1	-0.755741	9.66666	-5.1222	4.84994e-05	0.00121191	1.68889	1	ILMN_1709814	NMRAL1	ILMN_24779	57407	24476001	NM_020677.2	NP_065728.1	540524	S	1236	GGACCAGTGGCTGGAACAGCACAAAGGGGACTTCAACCTGCTGTGACCTG	-	4451768-4451781:4451782-4451817	0	0	0	NMRAL1	NmrA-like family domain containing 1	unknown	other	-0.547198	0.0511769	d	-0.58397	0.0387058	2
NOL6	-1.18928	9.69416	-8.49356	3.81299e-08	5.79693e-06	8.93651	1	-0.454304	9.69416	-3.24454	0.00397428	0.0445356	-2.65394	0	ILMN_2320250	NOL6	ILMN_7349	65083	39777589	NM_139235.3	NP_631981.2	3180706	A	3339	GAGCTCAGGAGTTCTAGACCAATCTGGGCAACAGAGAGACCCCATCTCTT	-	33451474-33451523	0	0	0	NOL6	nucleolar protein family 6 (RNA-associated)	Nucleus	other	-0.272299	0.142025	d	-0.0610018	0.790215	X
NOTCH3	0.901814	8.03928	7.58543	2.26131e-07	2.36817e-05	7.1712	1	1.16987	8.03928	9.84012	3.30964e-09	4.76451e-07	11.3151	1	ILMN_1658926	NOTCH3	ILMN_12369	4854	4557798	NM_000435.1	NP_000426.1	2340692	S	7990	TCCCTGTGTAGCTGAATTCCCAAGCCCTGCATTGTACAGCCCCCCACTCC	-	15131475-15131524	0	0	0	NOTCH3	notch 3	Plasma Membrane	transcription regulator	0.393591	0.158436	d	0.585115	0.0417945	2
NR2C2	0.717473	7.93852	5.77032	1.10098e-05	0.000489792	3.30449	1	0.282119	7.93852	2.26896	0.0342243	0.217987	-4.67984	0	ILMN_1724479	NR2C2	ILMN_183815	7182	83035137	NM_003298.3	NP_003289.2	7150382	S	2066	CGCAAACCACACACCTGCCAAGGAGCAACAGAATCCTTCCAGGACCGTTC	+	15059520-15059569	0	0	0	NR2C2	nuclear receptor subfamily 2, group C, member 2	Nucleus	ligand-dependent nuclear receptor	0.235397	0.126544	d	0.271402	0.0817318	X
C13orf18	1.61536	8.35812	12.7105	3.57042e-11	2.72256e-08	15.7334	1	1.64381	8.35812	12.9343	2.59393e-11	8.97795e-09	16.114	1	ILMN_1773388	C13orf18	ILMN_19053	80183	13376686	NM_025113.1	NP_079389.1	2850286	S	1926	CCCATTTCAGACAGCAACATGTAGAAGATGTTCAGCGTGCAGGGCTTGCT	-	45815618-45815633:45816877-45816910	0	0	0	KIAA0226L	KIAA0226-like	unknown	other	-	-	-	-	-	-
C13orf18	1.59556	8.46066	10.2635	1.60594e-09	5.05633e-07	12.0531	1	1.70128	8.46066	10.9435	5.24301e-10	1.07058e-07	13.1494	1	ILMN_2196550	C13orf18	ILMN_19053	80183	13376686	NM_025113.1	NP_079389.1	7000079	S	2010	CCGGTGTGCGAGGATCACAGCGAGGAGAAAACTTCTGGAAAGTGTGGCCT	-	45815534-45815583	0	0	0	KIAA0226L	KIAA0226-like	unknown	other	-	-	-	-	-	-
C14orf32	0.223168	9.17422	1.90552	0.0708585	0.346268	-5.14989	0	0.642208	9.17422	5.48349	2.11113e-05	0.00061144	2.52108	1	ILMN_1779279	C14orf32	ILMN_24999	93487	34147697	NM_144578.2	NP_653179.1	110328	S	2445	ACCCCTGGATAAAGGCACTTTCACTGCCTGTCACTGATCAGCAGATACTG	+	54605582-54605631	0	0	0	MAPK1IP1L	mitogen-activated protein kinase 1 interacting protein 1-like	Nucleus	other	-	-	-	-	-	-
C15orf21	1.04193	7.56586	8.50097	3.75968e-08	5.75172e-06	8.95044	1	1.33475	7.56586	10.89	5.71501e-10	1.13838e-07	13.0638	1	ILMN_1696031	C15orf21	ILMN_20661	283651	52630330	NM_001005267.1	NP_001005267.1	60040	A	1316	CAGTGTGTCAGGCAATCTGGACTTTGCCCTCAAAAGAGCAGTGGTTCCTG	+	43635854-43635903	0	0	0	C15orf21	high mobility group nucleosomal binding domain 2 pseudogene 46	unknown	other	-	-	-	-	-	-
C15orf24	0.372323	11.136	2.42597	0.0246159	0.179006	-4.20216	0	0.735056	11.136	4.78945	0.00010534	0.00230781	0.915047	1	ILMN_2150000	C15orf24	ILMN_14054	56851	56676383	NM_020154.2	NP_064539.1	1770181	S	753	CAGAGCTGGCATTTGCACAAACACGGCAACACTGGGTGGCATCCAAGTCT	-	32163766-32163815	0	0	0	C15orf24	chromosome 15 open reading frame 24	Extracellular Space	other	-	-	-	-	-	-
AOX1	0.301236	7.13544	6.23788	3.8871e-06	0.000222129	4.34082	0	0.607468	7.13544	12.5792	4.31506e-11	1.36743e-08	15.615	1	ILMN_1767113	AOX1	ILMN_26204	316	71773479	NM_001159.3	NP_001150.3	3780095	S	4150	GCCTCTTCCCAGATGGCAATCTGTCCTATCTCTGTGCTGGAAGATGCTAG	+	201243679-201243728	0	0	0	AOX1	aldehyde oxidase 1	Cytoplasm	enzyme	0.751004	0.0166399	X	1.44152	0.00046443	2
C15orf48	0.781845	11.6052	6.17821	4.43297e-06	0.000242484	4.20998	1	3.264	11.6052	25.7924	4.37503e-17	2.37234e-13	28.3927	1	ILMN_1805410	C15orf48	ILMN_2226	84419	37694068	NM_032413.2	NP_115789.1	1110373	A	449	GAAGAGTTGCAAAATGTCCAAAGGGTGACCAAATGACGAGCCCTCGCCTC	+	43512471-43512506:43512507-43512520	0	0	0	C15orf48	chromosome 15 open reading frame 48	Nucleus	other	-	-	-	-	-	-
C15orf48	1.22012	9.62674	6.23304	3.92867e-06	0.000223615	4.33023	1	2.60538	9.62674	13.3097	1.53297e-11	5.89069e-09	16.6282	1	ILMN_1654696	C15orf48	ILMN_2226	84419	37694068	NM_032413.2	NP_115789.1	4070719	I	147	GCGCGGTGGACGGTTTGGCGCCCACCAGGCGATCAATACTTTGGATTTTT	+	43510201-43510250	0	0	0	C15orf48	chromosome 15 open reading frame 48	Nucleus	other	-	-	-	-	-	-
AP1B1	-1.22517	8.62941	-2.59443	0.0171364	0.141172	-3.86765	0	-1.6693	8.62941	-3.53493	0.00202385	0.0259573	-2.00025	1	ILMN_2387505	AP1B1	ILMN_27296	162	22027652	NM_145730.1	NP_663782.1	730301	A	3465	TTGGTACCAGGAGAGCTGCTCACTTAGGGCCTGGGGCTCAAGGAGCTGTA	-	28054308-28054357	0	0	0	AP1B1	adaptor-related protein complex 1, beta 1 subunit	Cytoplasm	transporter	-1.08472	0.0079179	X	-0.892455	0.0174244	2
NXT1	-0.588994	9.07381	-4.17278	0.000450374	0.00921171	-0.369545	1	-0.358515	9.07381	-2.53993	0.0192843	0.146705	-4.15209	0	ILMN_1760280	NXT1	ILMN_26865	29107	20127526	NM_013248.2	NP_037380.1	4780398	S	905	TTCTGTTGTTGCGGAGACACTGCAGACTCCACTGTGCCGAGGTTGAACTC	+	23283196-23283245	0	0	0	NXT1	NTF2-like export factor 1	Nucleus	transporter	-0.374625	0.208373	d	-0.581824	0.0553099	X
AP1G2	0.370497	8.89032	1.85436	0.078156	0.365707	-5.23487	0	0.700442	8.89032	3.50575	0.00216669	0.0274185	-2.0666	1	ILMN_1754179	AP1G2	ILMN_26009	8906	18104994	NM_003917.2	NP_003908.1	7400468	A	2530	CACAGTTCCAGCTCGGGGTGGCCTTCCTATCACCCAGCTCTTCAGAATCC	-	23099000-23099049	0	0	0	AP1G2	adaptor-related protein complex 1, gamma 2 subunit	Cytoplasm	transporter	0.598151	0.149936	X	1.09219	0.0154485	2
OBFC1	-0.718823	8.20079	-7.92208	1.15401e-07	1.41148e-05	7.83915	1	-0.334562	8.20079	-3.68717	0.00141629	0.0193988	-1.65215	0	ILMN_1789186	OBFC1	ILMN_29568	79991	34147613	NM_024928.3	NP_079204.1	4120750	S	1119	TCACATGGAGAAGGGCTGTCACTTCCTGCACATCTTGGCCTGTGCTCGCC	-	105632541-105632589:105638820-105638820	0	0	0	OBFC1	oligonucleotide/oligosaccharide-binding fold containing 1	Nucleus	other	-0.609739	0.107174	1	-0.574982	0.13119	X
OPRL1	-0.715896	8.48455	-6.76885	1.23159e-06	9.10667e-05	5.48524	1	-0.319734	8.48455	-3.02311	0.00659871	0.0661773	-3.14049	0	ILMN_2400922	OPRL1	ILMN_6491	4987	33286425	NM_000913.3	NP_000904.1	1440754	A	3094	TTATGCATGTGGCAAGCGTTACTTCCTGTGCACGTAGCCAGCCCTGGGTC	+	62202326-62202375	0	0	0	OPRL1	opiate receptor-like 1	Plasma Membrane	G-protein coupled receptor	-0.546392	0.0505313	d	-0.104734	0.747432	X
OSGIN2	1.04935	8.6794	7.47992	2.80083e-07	2.76917e-05	6.95858	1	-0.0364379	8.6794	-0.259733	0.797664	0.951993	-7.03389	0	ILMN_1757732	OSGIN2	ILMN_21417	734	4757889	NM_004337.1	NP_004328.1	2070309	S	2320	CTCTCAGGCCCCACAACTTACTTCCTGCATTTTAACAAGATCCCCAAGGG	+	91007391-91007440	0	0	0	OSGIN2	oxidative stress induced growth inhibitor family member 2	unknown	other	0.796824	0.0971765	1	-0.0462226	0.944354	X
P2RY11	-1.56174	9.76151	-6.75033	1.28119e-06	9.41457e-05	5.44594	1	-0.938338	9.76151	-4.0558	0.000593811	0.00959574	-0.79904	1	ILMN_1752226	P2RY11	ILMN_12237	5032	52485986	NM_002566.4	NP_002557.2	3930379	S	1882	AGGGACCCCAGGCACAAGAGCTGCCACCCCTCTGCCCGGTTTTGGAAAAA	+	10086970-10087019	0	0	0	P2RY11	purinergic receptor P2Y, G-protein coupled, 11	Plasma Membrane	other	-0.651998	0.101498	1	-0.895666	0.0307115	2
PANX2	1.59598	8.18669	9.31513	8.35634e-09	1.75778e-06	10.4349	1	3.09532	8.18669	18.0662	4.74058e-14	6.25269e-11	22.1552	1	ILMN_1694810	PANX2	ILMN_4796	56666	39995065	NM_052839.2	NP_443071.1	4070300	S	2860	CCTCAGCCATGGAGACCATGTCATGCAGAATTAACAAGGTAGCACCGAGC	+	48960774-48960823	0	0	0	PANX2	pannexin 2	Plasma Membrane	transporter	0.264088	0.095641	d	0.557813	0.00342087	2
PARVG	-0.786866	10.7593	-6.01025	6.43203e-06	0.000323938	3.83941	1	-1.58311	10.7593	-12.0921	8.83431e-11	2.47777e-08	14.9104	1	ILMN_1695851	PARVG	ILMN_21849	64098	51477697	NM_022141.4	NP_071424.1	6200685	S	1455	AGGGTGTCCTCCCACAGTCCCGCTGTTTCCTGTGCATTCGTGACCCGCTT	+	42933701-42933750	0	0	0	PARVG	parvin, gamma	Cytoplasm	other	-0.141455	0.655897	d	-0.594386	0.0394846	2
PCNX	0.624485	10.2939	3.81195	0.0010559	0.0178428	-1.20322	1	0.678239	10.2939	4.14007	0.000486573	0.00813488	-0.602633	1	ILMN_1740010	PCNX	ILMN_4895	22990	126723563	NM_014982.2	NP_055797.2	7050626	S	7612	AGCACCTCTCCTTTGCCCTTCACCCTGACTCCTGTCACTGTCTCCATCCC	+	70646545-70646594	0	0	0	PCNX	pecanex homolog (Drosophila)	Plasma Membrane	other	0.604192	0.0850795	1	1.1988	0.00393093	2
PDE4D	0.838101	7.60817	5.25809	3.54205e-05	0.00124448	2.14302	1	1.113	7.60817	6.98276	7.83235e-07	4.09683e-05	5.83006	1	ILMN_1791483	PDE4D	ILMN_164639	5144	46361981	NM_006203.3	NP_006194.2	1770114	S	5743	GTACTTCTTGCCAGGGAGCAGCACTGCATGTGTGATGGTTGTTTGCCATC	-	58302551-58302600	0	0	0	PDE4D	phosphodiesterase 4D, cAMP-specific	Cytoplasm	enzyme	0.401159	0.0621129	d	0.738916	0.00358042	2
C17orf91	0.753838	8.44899	4.81843	9.84288e-05	0.00273238	1.12987	1	0.639015	8.44899	4.0845	0.000554869	0.00905945	-0.732188	1	ILMN_2390310	C17orf91	ILMN_17772	84981	49355753	NM_001001870.1	NP_001001870.1	5290161	A	975	CTCCATCCAGATGGTGGAGTACCGCGCAGACATTAAAAGTCATGTAAAAG	-	1561813-1561862	0	0	0	MIR22HG	MIR22 host gene (non-protein coding)	unknown	other	-	-	-	-	-	-
APIP	0.339485	8.23881	3.45032	0.00246588	0.034052	-2.02636	0	0.696387	8.23881	7.07766	6.41985e-07	3.46189e-05	6.0301	1	ILMN_2128293	APIP	ILMN_15379	51074	7705723	NM_015957.1	NP_057041.1	7380010	S	650	GGTCAGACGTCATGGAGTATATGTGTGGGGGGAAACATGGGAGAAGGCCA	-	34861466-34861515	0	0	0	APIP	APAF1 interacting protein	Cytoplasm	enzyme	0.537747	0.0966105	X	1.07203	0.00475027	2
APOC1	-0.690645	11.6944	-2.51646	0.0202853	0.157437	-4.02395	0	-1.74668	11.6944	-6.36424	2.9472e-06	0.000121068	4.49742	1	ILMN_1789007	APOC1	ILMN_14337	341	51944963	NM_001645.3	NP_001636.1	3830465	S	338	CATGAGGACCTGAAGGGTGACATCCCAGGAGGGGCCTCTGAAATTTCCCA	+	50114323-50114327:50114328-50114372	0	0	0	APOC1	apolipoprotein C-I	Extracellular Space	transporter	-0.644673	0.168793	X	-1.63071	0.00373171	2
PDGFB	0.689546	8.3813	5.12543	4.81368e-05	0.00157663	1.8386	1	-0.980042	8.3813	-7.28471	4.17762e-07	2.44749e-05	6.46226	1	ILMN_1775822	PDGFB	ILMN_18749	5155	4505680	NM_002608.1	NP_002599.1	4040397	A	2951	GGGAGGCAACACTGCTGTCCACATGACCTCCATTTCCCAAAGTCCTCTGC	-	37950040-37950089	0	0	0	PDGFB	platelet-derived growth factor beta polypeptide	Extracellular Space	growth factor	0.500615	0.0909764	d	-0.129712	0.707769	d
C1orf104	0.0623315	7.46689	0.65212	0.521581	0.844644	-6.6648	0	0.611757	7.46689	6.40028	2.72451e-06	0.000113352	4.5764	1	ILMN_1725906	C1orf104	ILMN_16035	284618	27735030	NM_173639.1	NP_775910.1	3870091	S	1737	CCCCCTCTTAGCATTTGCAGAGCCTAGCACAGCATTAGGCCTGGAGTGAG	-	153553327-153553376	0	0	0	RUSC1-AS1	RUSC1 antisense RNA 1 (non-protein coding)	unknown	other	-	-	-	-	-	-
PDLIM7	0.704276	9.12845	4.45585	0.000230807	0.00543361	0.288073	1	1.33243	9.12845	8.43007	4.30308e-08	3.76635e-06	8.74666	1	ILMN_1690125	PDLIM7	ILMN_5202	9260	47157327	NM_213636.1	NP_998801.1	4560164	I	915	CATCTGACACTGCCTTCCCTCTTTGCCCTGTGGTACTGCTGTCTGCCAGG	-	176849893-176849942	0	0	0	PDLIM7	PDZ and LIM domain 7 (enigma)	Cytoplasm	other	0.291687	0.135087	d	0.346099	0.0797463	d
PFAS	-0.882881	7.93849	-10.0322	2.37759e-09	6.82536e-07	11.6692	1	-0.513521	7.93849	-5.83518	9.51467e-06	0.000316952	3.32021	0	ILMN_1755862	PFAS	ILMN_17615	5198	31657128	NM_012393.1	NP_036525.1	3840092	S	5125	GACTGTTGTTGATTAGTTATTATTGCAAAGCACTGTCACCGGCCTCAGGG	+	8114315-8114364	0	0	0	PFAS	phosphoribosylformylglycinamidine synthase	Cytoplasm	enzyme	-0.265582	0.238283	d	-0.29368	0.194567	X
APRT	-0.575382	9.5836	-4.09851	0.000536801	0.0105548	-0.54176	0	-0.982461	9.5836	-6.99817	7.58283e-07	3.99199e-05	5.86263	1	ILMN_1722491	APRT	ILMN_4221	353	71773149	NM_000485.2	NP_000476.1	160746	I	479	TGAGGTCCTGGAGTGCGTGAGCCTGGTGGAGCTGACCTCGCTTAAGGGCA	-	87403656-87403705	0	0	0	APRT	adenine phosphoribosyltransferase	Cytoplasm	enzyme	-0.406283	0.0549837	X	-1.06508	0.000430735	2
C1orf24	1.12883	10.2625	5.89176	8.3805e-06	0.000397845	3.57603	1	0.826795	10.2625	4.31532	0.000321588	0.00578686	-0.193333	1	ILMN_1667966	C1orf24	ILMN_8647	116496	16757969	NM_052966.1	NP_443198.1	3370768	I	6209	CCTTAGCCTCTGTTTGCCACTCTGGGTATCGTCTCCTATGGCAAAGCCAT	-	183027456-183027505	0	0	0	FAM129A	family with sequence similarity 129, member A	Cytoplasm	other	-	-	-	-	-	-
C1orf71	0.663805	9.34931	4.37421	0.00027984	0.00632256	0.0983024	1	0.358373	9.34931	2.36154	0.0282085	0.191252	-4.50329	0	ILMN_1670263	C1orf71	ILMN_21085	163882	22749246	NM_152609.1	NP_689822.1	6650121	S	3521	AAATCTGTCCGTTAGGTGGCCTTTCCTTATCTGAGGTGTAGTGGTCTAAC	+	244896962-244897011	0	0	0	CNST	consortin, connexin sorting protein	Cytoplasm	other	-	-	-	-	-	-
APRT	-0.420851	9.09407	-2.65908	0.014881	0.128649	-3.73628	0	-0.771783	9.09407	-4.87639	8.59514e-05	0.00194555	1.11775	1	ILMN_1726410	APRT	ILMN_4221	353	71773149	NM_000485.2	NP_000476.1	6510603	A	339	TCCCTGGAGTACGGGAAGGCTGAGCTGGAGATTCAGAAAGACGCCCTGGA	-	87404025-87404057:87404332-87404348	0	0	0	APRT	adenine phosphoribosyltransferase	Cytoplasm	enzyme	-0.406283	0.0549837	X	-1.06508	0.000430735	2
PHACTR1	0.652266	8.14032	3.63497	0.00160099	0.0246939	-1.60814	1	-0.662394	8.14032	-3.69142	0.00140224	0.0192441	-1.64241	1	ILMN_1736982	PHACTR1	ILMN_17425	221692	54144630	NM_030948.1	NP_112210.1	3170139	S	1803	AGATAAGCCGTGGACCCGCCTCACCGCTGCAGACAAAGCTGCCATCCGAA	+	13391737-13391773:13394357-13394369	0	0	0	PHACTR1	phosphatase and actin regulator 1	Cytoplasm	other	0.604214	0.101355	1	-0.414461	0.270422	d
PIGA	0.726888	8.80929	7.13444	5.7031e-07	4.8404e-05	6.25145	1	-0.101912	8.80929	-1.00027	0.32886	0.731829	-6.56039	0	ILMN_1705985	PIGA	ILMN_5077	5277	110224462	NM_020473.2	NP_065206.2	6650687	A	2744	CTGTCAGTTTGCACTGGTCGGTATATGGAAACACATTGCTCTACCCTGCT	-	15247652-15247701	0	0	0	PIGA	phosphatidylinositol glycan anchor biosynthesis, class A	Cytoplasm	enzyme	0.261362	0.179868	d	-0.16996	0.408195	X
PIM2	0.978812	8.60595	5.41976	2.44256e-05	0.000925479	2.51216	1	0.928634	8.60595	5.14192	4.6333e-05	0.00117036	1.73455	1	ILMN_1748283	PIM2	ILMN_27932	11040	42821111	NM_006875.2	NP_006866.2	6200168	S	1682	GGGTGAGGGGACCCTACTCTGTTATCCCAAGTGCTCTTATTCTGGTGAGA	-	48655729-48655778	0	0	0	PIM2	pim-2 oncogene	unknown	kinase	0.976177	0.0606333	1	1.64844	0.0054338	2
PIN1	-0.657033	11.0061	-5.49282	2.06662e-05	0.000810084	2.67825	1	0.0436083	11.0061	0.364567	0.719175	0.928658	-6.99998	0	ILMN_1776375	PIN1	ILMN_3395	5300	56676308	NM_006221.2	NP_006212.1	4640168	S	891	CACGCTCCTCTGTTCAGTCGCAAAGGTGAACACTCATGCGGCCCAGCCAT	+	9821252-9821301	0	0	0	PIN1	peptidylprolyl cis/trans isomerase, NIMA-interacting 1	Nucleus	enzyme	-0.174572	0.386438	d	0.255196	0.194843	X
PLA2G12B	0.777696	7.23646	6.65505	1.57078e-06	0.000108888	5.24305	1	0.12353	7.23646	1.05709	0.302788	0.709224	-6.50254	0	ILMN_1808487	PLA2G12B	ILMN_962	84647	45505134	NM_032562.2	NP_115951.2	4120392	S	989	TTGTGGGGAGTCCAGCCATTTGGGAGGCAATGACTTTCTGCTGGCCCATG	-	74364997-74365046	0	0	0	PLA2G12B	phospholipase A2, group XIIB	Extracellular Space	enzyme	0.630579	0.117785	1	0.107157	0.833789	X
PLA2G15	-0.843228	8.8558	-5.56628	1.74792e-05	0.000709668	2.84476	1	-1.20627	8.8558	-7.96274	1.06506e-07	7.95971e-06	7.83642	1	ILMN_1756910	PLA2G15	ILMN_25518	23659	64085296	NM_012320.3	NP_036452.1	6480037	S	2480	GGCAGTAGGCTCTAAGTGGGTGACTGGCCACAGGCCGAGAAAAGGGTACA	+	66852219-66852268	0	0	0	PLA2G15	phospholipase A2, group XV	Cytoplasm	enzyme	-0.637932	0.05061	1	-0.799225	0.0187711	2
PLAC8	0.674468	7.69876	3.39546	0.00280185	0.0376332	-2.14961	1	-0.280172	7.69876	-1.41047	0.173422	0.554804	-6.0807	0	ILMN_2093343	PLAC8	ILMN_17809	51316	7706157	NM_016619.1	NP_057703.1	2490372	S	281	ATGCTGTCTGTGTGGAACAAGCGTCGCAATGAGGACTCTCTACAGGACCC	-	84245085-84245134	0	0	0	PLAC8	placenta-specific 8	Nucleus	other	0.100222	0.876023	d	-0.365509	0.510453	X
PLAU	0.630846	10.7923	3.24079	0.00400878	0.0493284	-2.49406	1	0.109994	10.7923	0.565063	0.578173	0.875839	-6.904	0	ILMN_1656057	PLAU	ILMN_24167	5328	53729348	NM_002658.2	NP_002649.1	5360670	S	2049	GTGGTCTTTCTGGAGAGGTTATAGGTCACTCCTGGGGCCTCTTGGGTCCC	+	75346964-75347013	1	0	0	PLAU	plasminogen activator, urokinase	Extracellular Space	peptidase	0.679685	0.0934424	1	0.0361426	0.948791	X
C20orf127	4.40765	8.50233	17.6668	7.2964e-14	1.78039e-10	21.4761	1	5.37444	8.50233	21.5419	1.53791e-15	4.16962e-12	25.2918	1	ILMN_1662640	C20orf127	ILMN_15264	140851	50233782	NM_080757.1	NP_542795.1	4480600	S	169	TCTGCAAAGGGGCGTGCAGCTGCTGTGTCTGATGTGGGGACAGCTCTTCT	+	33269618-33269649:33269650-33269667	0	0	0	C20orf127	metallothionein 1 pseudogene 3	unknown	other	-	-	-	-	-	-
PLCG1	-0.765172	7.90795	-3.47475	0.00232933	0.0325918	-1.97133	1	-0.538619	7.90795	-2.44594	0.0235918	0.168982	-4.33885	0	ILMN_1740160	PLCG1	ILMN_25758	5335	33598945	NM_182811.1	NP_877963.1	2260131	A	4988	GATCCAGGGATGGAGATGGGAAGGTTAGAAAGGCAGCCCTCACCTCTGAG	+	39237557-39237606	0	0	0	PLCG1	phospholipase C, gamma 1	Cytoplasm	enzyme	-0.123834	0.769122	d	-0.390576	0.279923	X
PLCXD1	1.16517	8.42516	6.8911	9.50173e-07	7.45504e-05	5.74348	1	-1.73945	8.42516	-10.2875	1.54225e-09	2.58642e-07	12.0766	1	ILMN_1747451	PLCXD1	ILMN_8273	55344	94158612	NM_018390.2	NP_060860.1	3850064	S	1838	GTACCCGGTTGCTACGGTGAAATGAAGGTGCCCCGCATCCAGAAAGACGC	+	149851-149885:149702-149716	0	0	0	PLCXD1	phosphatidylinositol-specific phospholipase C, X domain containing 1	unknown	enzyme	0.639711	0.17002	1	-1.2501	0.0140019	2
PLSCR1	0.842072	8.30172	3.53601	0.00201876	0.0291558	-1.83292	1	1.1377	8.30172	4.77738	0.000108362	0.00236296	0.886874	1	ILMN_1745242	PLSCR1	ILMN_4441	5359	10863876	NM_021105.1	NP_066928.1	3890609	S	422	CCTGGCCCAGCTGGCTTTCCTGTCCCAAATCAGCCAGTGTATAATCAGCC	-	147729187-147729236	0	0	0	PLSCR1	phospholipid scramblase 1	Plasma Membrane	enzyme	0.572222	0.159437	d	1.35513	0.00469923	2
C20orf45	0.735747	8.66636	5.67345	1.37039e-05	0.000581091	3.08674	1	0.646356	8.66636	4.98414	6.68455e-05	0.00157594	1.36851	1	ILMN_1728168	C20orf45	ILMN_15088	51012	7705609	NM_016045.1	NP_057129.1	7000403	S	1031	GCAGAGCCACCTCCTATAGACGCCCATTGCCCTGCTGCTGTACACTTCAG	-	57043045-57043094	0	0	0	SLMO2	slowmo homolog 2 (Drosophila)	Cytoplasm	other	-	-	-	-	-	-
PMM2	-0.719392	8.56443	-6.51956	2.1031e-06	0.000136483	4.95246	1	-0.409017	8.56443	-3.70676	0.00135256	0.0187044	-1.60715	0	ILMN_1785336	PMM2	ILMN_15498	5373	4557838	NM_000303.1	NP_000294.1	1260315	S	2093	ACCTGGTTCCCTCCAAACCTCCCAGCCACTCGGGCTTGTAACTGTCTGAG	+	8850487-8850536	0	0	0	PMM2	phosphomannomutase 2	Cytoplasm	enzyme	-0.0520517	0.85627	d	-0.0613941	0.833922	X
POLRMT	-0.596243	8.81884	-3.46853	0.00236337	0.0329629	-1.98535	1	-0.51071	8.81884	-2.97096	0.00742667	0.0725308	-3.25325	0	ILMN_1770356	POLRMT	ILMN_168627	5442	110618252	NM_005035.3	NP_005026.3	1990053	S	3485	CCTGACCTTCGTCTCTGTGCACGACTGTTACTGGACTCACGCAGCTGATG	-	568793-568842	0	0	0	POLRMT	polymerase (RNA) mitochondrial (DNA directed)	Cytoplasm	enzyme	-0.513652	0.194838	d	-0.301392	0.478524	X
PPFIBP2	-1.16849	10.1859	-7.24026	4.57908e-07	4.07046e-05	6.46981	1	-0.733114	10.1859	-4.54256	0.000188145	0.0037264	0.338163	1	ILMN_1675656	PPFIBP2	ILMN_183115	8495	57163846	NM_003621.1	NP_003612.1	6900053	S	3381	CCACAGTCTTGGCTGAGATCAAAGGGATGAGCAACAGGGACTTCTGCCAC	+	7631436-7631485	0	0	0	PPFIBP2	PTPRF interacting protein, binding protein 2 (liprin beta 2)	Nucleus	phosphatase	-0.714694	0.0983304	1	-0.765433	0.0794057	1
C22orf36	0.915412	7.3881	10.567	9.68245e-10	3.39945e-07	12.5471	1	0.623482	7.3881	7.19714	5.00664e-07	2.8345e-05	6.28018	1	ILMN_1737255	C22orf36	ILMN_169188	388886	134288866	NM_207644.2	NP_997527.2	7160156	S	1021	CAAGCACATGATAGTGGGCGATGAAGGTCAAGGAGGACTCACAGGCCCCC	-	23311760-23311809	0	0	0	C22orf36	chromosome 22 open reading frame 36	unknown	other	-	-	-	-	-	-
PPP1CA	-0.686706	10.8332	-3.88081	0.000897646	0.0157749	-1.04481	1	-0.464997	10.8332	-2.62786	0.0159329	0.127699	-3.97412	0	ILMN_1695827	PPP1CA	ILMN_29100	5499	56790944	NM_001008709.1	NP_001008709.1	3990368	A	851	TGGCCAAGTTCCTCCACAAGCACGACTTGGACCTCATCTGCCGAGCACAC	-	66922989-66923038	0	1	0	PPP1CA	protein phosphatase 1, catalytic subunit, alpha isozyme	Cytoplasm	phosphatase	-0.251246	0.129136	d	-0.287758	0.0851463	X
C2orf30	0.272889	9.44662	1.62721	0.118993	0.458235	-5.5917	0	0.646867	9.44662	3.85719	0.000949082	0.0140015	-1.26015	1	ILMN_1724376	C2orf30	ILMN_22881	27248	20070263	NM_015701.2	NP_056516.2	4920274	S	2093	ACTAGAAACTGGGCACATGGTAGAGGCTCACATGGGAGTTGTCCTCACCC	+	53899120-53899169	0	0	0	ERLEC1	endoplasmic reticulum lectin 1	Extracellular Space	other	-	-	-	-	-	-
C2orf32	0.279076	8.26805	1.75721	0.0938336	0.404412	-5.39168	0	-0.870718	8.26805	-5.48249	2.11597e-05	0.000612113	2.51879	1	ILMN_2182148	C2orf32	ILMN_1437	25927	24308070	NM_015463.1	NP_056278.1	2350142	S	1097	GGCCCTGGCAGGCTTGTCCTGCTCTTGACCATTCCACTGACTAACTTTGG	-	68374157-68374206	0	0	0	CNRIP1	cannabinoid receptor interacting protein 1	unknown	other	-	-	-	-	-	-
C3orf59	1.00186	8.73262	7.31809	3.90007e-07	3.55622e-05	6.62943	1	0.941684	8.73262	6.87852	9.75787e-07	4.92455e-05	5.60896	1	ILMN_1700967	C3orf59	ILMN_14619	151963	31341922	NM_178496.2	NP_848591.1	2030687	S	3083	TTTGGTGTGGACTAATGGCAAGCTGGTGTTTAAGAGGTCAGGAGGCCTGC	-	193997533-193997582	0	0	0	MB21D2	Mab-21 domain containing 2	unknown	other	-	-	-	-	-	-
C4orf31	0.118183	7.15715	0.847455	0.406543	0.780302	-6.51694	0	1.85045	7.15715	13.269	1.62195e-11	6.04233e-09	16.5731	1	ILMN_1689176	C4orf31	ILMN_175315	79625	109715836	NM_024574.3	NP_078850.3	1010746	S	2477	CTTGAAGGAACTTGCCATTCCTTGCTTTGACCACTGCATGAACTGCTTCT	-	122176576-122176625	0	0	0	NDNF	neuron-derived neurotrophic factor	Extracellular Space	other	-	-	-	-	-	-
C5orf13	1.27407	8.72758	8.20155	6.67843e-08	9.02827e-06	8.38151	1	0.937183	8.72758	6.0329	6.11583e-06	0.000218495	3.7639	1	ILMN_1680738	C5orf13	ILMN_2442	9315	4758865	NM_004772.1	NP_004763.1	940471	S	1690	CAGGGCAGGCCTTGTTCTGAACTGTTTCGCTTCTGACTGTTAAACACCGA	-	111093165-111093214	0	0	0	C5orf13	chromosome 5 open reading frame 13	Cytoplasm	other	-	-	-	-	-	-
PPP1R13B	0.711248	7.8233	3.35086	0.00310768	0.0405588	-2.24941	1	1.96524	7.8233	9.25871	9.24926e-09	1.09294e-06	10.2878	1	ILMN_1748831	PPP1R13B	ILMN_13872	23368	121114286	NM_015316.2	NP_056131.2	3420228	S	4891	ATGGCCGCTGCCAGCCCAGACGCTGCTGACGCTGTGTAAATGTGCACAAT	-	103269859-103269908	0	0	0	PPP1R13B	protein phosphatase 1, regulatory subunit 13B	Cytoplasm	phosphatase	0.617859	0.247805	1	1.41712	0.0144128	2
PRMT1	-0.621608	10.3796	-6.90777	9.17291e-07	7.23193e-05	5.77853	1	-0.54774	10.3796	-6.08688	5.42508e-06	0.000198467	3.88428	0	ILMN_1692473	PRMT1	ILMN_19878	3276	150456456	NM_198319.2	NP_938075.2	6400138	A	1176	CCCAACGCCAAGAACAACCGGGACCTGGACTTCACCATCGACCTGGACTT	+	54881778-54881795:54883231-54883262	0	0	0	PRMT1	protein arginine methyltransferase 1	Nucleus	enzyme	-0.177357	0.226873	d	-0.129466	0.400572	X
PRNP	0.637503	10.4184	3.51365	0.00212709	0.0302907	-1.8835	1	-1.06985	10.4184	-5.89654	8.29125e-06	0.000284895	3.45835	1	ILMN_2360415	PRNP	ILMN_11177	5621	122056621	NM_183079.2	NP_898902.1	2710341	A	1665	CAGCCCGCTGGAGCATGAGCTCTGTGTGTACCGAGAACTGGGGTGATGTT	+	4629163-4629212	0	1	0	PRNP	prion protein	Plasma Membrane	other	0.381993	0.139227	d	-1.31553	0.000453043	2
C6orf128	0.859376	7.25308	7.00212	7.52015e-07	6.16804e-05	5.97625	1	-0.01352	7.25308	-0.11016	0.913356	0.9823	-7.06265	0	ILMN_1756238	C6orf128	ILMN_27860	221468	31543075	NM_145316.2	NP_660359.2	5340161	S	1368	CCTCCCTACCCTGCCTGTCTTCTGTTGATGCTGCTTGGTTTGTCAGGGCT	-	37288063-37288112	0	0	0	TMEM217	transmembrane protein 217	unknown	other	-	-	-	-	-	-
C6orf136	1.06783	9.42452	9.82492	3.398e-09	8.58356e-07	11.3192	1	1.10837	9.42452	10.198	1.79364e-09	2.92753e-07	11.9261	1	ILMN_1813236	C6orf136	ILMN_24943	221545	21450766	NM_145029.1	NP_659466.1	520201	S	1314	CAGCACTGAAGACTGCTACGCCCAAGAGAAGGAGGTGGAGGCAGCCAAGA	+	30728693-30728742	0	0	0	C6orf136	chromosome 6 open reading frame 136	Cytoplasm	other	-	-	-	-	-	-
PSMA6	0.716644	10.2746	3.58735	0.00179014	0.0267408	-1.71647	1	1.00284	10.2746	5.01999	6.14937e-05	0.00147109	1.4518	1	ILMN_1704094	PSMA6	ILMN_17034	5687	23110943	NM_002791.1	NP_002782.1	7040470	S	215	GGCCTTACATCAGTAGCTGTCAGAGGGAAAGACTGTGCAGTAATTGTCAC	+	34846980-34847029	0	0	0	PSMA6	proteasome (prosome, macropain) subunit, alpha type, 6	Cytoplasm	peptidase	0.317499	0.127085	d	0.898934	0.00112438	2
PSMB10	-0.61862	12.5329	-4.07024	0.000573891	0.0111139	-0.607246	1	-0.689174	12.5329	-4.53445	0.000191776	0.00378442	0.319184	1	ILMN_1683026	PSMB10	ILMN_29653	5699	23110923	NM_002801.2	NP_002792.1	2000445	S	876	ACCCTGGAGCTAGTGGAGGAAACTGTGCAGGCTATGGAGGTGGAGTAAGC	-	66525961-66525963:66525964-66526010	0	0	0	PSMB10	proteasome (prosome, macropain) subunit, beta type, 10	Cytoplasm	peptidase	-0.310392	0.0567359	d	-0.791712	0.000517626	2
C6orf65	0.0581778	7.0539	0.536711	0.597254	0.879252	-6.73478	0	0.688022	7.0539	6.34726	3.05859e-06	0.000124423	4.46013	1	ILMN_1706969	C6orf65	ILMN_27593	221336	148806919	NM_152731.2	NP_689944.2	3520164	S	2436	AGGCTTCTCGCTTGGTGTCAGGTTGTCACATGTGACCACTGTGCAATGCG	+	56999839-56999888	0	0	0	BEND6	BEN domain containing 6	unknown	other	-	-	-	-	-	-
C6orf85	1.25763	7.97681	6.98786	7.74887e-07	6.31319e-05	5.94644	1	-0.0520196	7.97681	-0.28904	0.775459	0.944899	-7.02555	0	ILMN_1705116	C6orf85	ILMN_491	63027	48526515	NM_021945.4	NP_068764.3	6560328	S	5115	GTCCTCTCGTCTAGAAGGCACCACCTCGCTTTCATGTCCCGTGTGTTTTG	-	3214941-3214990	0	0	0	SLC22A23	solute carrier family 22, member 23	unknown	transporter	-	-	-	-	-	-
C6orf97	0.030705	7.64041	0.221227	0.827108	0.958701	-6.85787	0	0.97363	7.64041	7.01492	7.32099e-07	3.88347e-05	5.89797	1	ILMN_1772588	C6orf97	ILMN_18218	80129	38570057	NM_025059.2	NP_079335.2	4640398	S	4627	GGAGCTTGAGTGGCTCTGCCCCACCCTGAATCATGCACCCATAAATGCAG	+	151983417-151983466	0	0	0	C6orf97	chromosome 6 open reading frame 97	unknown	other	-	-	-	-	-	-
PTAFR	0.586917	10.2248	3.40693	0.00272809	0.0368799	-2.12389	1	0.271705	10.2248	1.57719	0.130084	0.482924	-5.84707	0	ILMN_1746836	PTAFR	ILMN_2949	5724	47777315	NM_000952.3	NP_000943.1	6450093	S	1441	GGCCAGGTGCAGACCTTGGGGGAAGACTTTAAACCACCTAGTTCTCCCCG	-	28348756-28348805	0	0	0	PTAFR	platelet-activating factor receptor	Plasma Membrane	G-protein coupled receptor	0.483138	0.0821397	d	0.6237	0.0302887	X
ARL6IP5	-0.275598	11.4228	-1.62234	0.120036	0.460282	-5.59896	0	0.738036	11.4228	4.34453	0.000300154	0.00547798	-0.125044	1	ILMN_1769810	ARL6IP5	ILMN_887	10550	51944964	NM_006407.3	NP_006398.1	2070563	S	2035	CCATGACTTCACAGACATGGTCTAGAATCTGTACCCTTACCCACATATGA	+	69237836-69237885	0	0	0	ARL6IP5	ADP-ribosylation-like factor 6 interacting protein 5	Cytoplasm	other	-0.32543	0.25863	X	0.429912	0.135899	d
PTPLA	0.618177	7.54563	3.72562	0.00129389	0.0209754	-1.40117	1	1.40299	7.54563	8.4555	4.09941e-08	3.63744e-06	8.79533	1	ILMN_1725791	PTPLA	ILMN_24983	9200	82659104	NM_014241.3	NP_055056.3	730221	S	530	AGAGAGTGTGGTGCTTTTTCTGGTCGCGTGGACTGTGACAGAGATCACTC	-	17681355-17681404	0	0	0	PTPLA	protein tyrosine phosphatase-like (proline instead of catalytic arginine), member A	unknown	phosphatase	0.591326	0.371203	1	2.25607	0.00351753	2
PTPRF	0.594781	7.3333	10.6853	7.97231e-10	2.9928e-07	12.7365	1	0.532683	7.3333	9.56967	5.31119e-09	6.91192e-07	10.8426	0	ILMN_2380163	PTPRF	ILMN_171198	5792	109633040	NM_002840.3	NP_002831.2	3060398	A	7522	GTCCCCAAACCTAGCTAGGCTAAGTCAAGATCAACATTCCAGGGTTGGTA	+	43861719-43861768	0	0	0	PTPRF	protein tyrosine phosphatase, receptor type, F	Plasma Membrane	phosphatase	0.0273078	0.874879	d	0.399154	0.0095572	X
PTRF	0.946168	7.96098	4.2472	0.000377739	0.00801845	-0.196798	1	4.13314	7.96098	18.553	2.83481e-14	4.46272e-11	22.6336	1	ILMN_1757552	PTRF	ILMN_22301	284119	141802932	NM_012232.3	NP_036364.2	4850301	S	3445	CTTGGTGCTGATGGCCTGAAGGGGCCTGAGCTGTGGGCAGATGCAGTTTT	-	37808068-37808117	0	0	0	PTRF	polymerase I and transcript release factor	Nucleus	transcription regulator	0.313902	0.564826	d	1.54638	0.00690634	2
C9orf30	0.898375	8.33814	4.68672	0.000134042	0.00350435	0.824457	1	0.692086	8.33814	3.61054	0.00169543	0.022429	-1.82777	1	ILMN_1714278	C9orf30	ILMN_15668	91283	18087818	NM_080655.1	NP_542386.1	5260538	S	727	GGCCAAAATCCAGCAGATAGAGCGAGAGTGTGAGATGGCAGAGGAGGAAC	+	102252901-102252950	0	0	0	C9orf30	chromosome 9 open reading frame 30	unknown	other	-	-	-	-	-	-
C9orf46	0.922339	9.52792	5.14134	4.63953e-05	0.00153296	1.87515	1	0.37739	9.52792	2.10366	0.0479626	0.272466	-4.98437	0	ILMN_1709043	C9orf46	ILMN_17839	55848	142352128	NM_018465.2	NP_060935.1	6520661	S	435	GCCAGCCTTCCTGGTCCCGATTGTTCCATTAAGCTTTATCCTCACCTACC	-	5351119-5351168	0	0	0	C9orf46	chromosome 9 open reading frame 46	Cytoplasm	other	-	-	-	-	-	-
C9orf61	0.357337	7.2245	2.98579	0.00718159	0.0765065	-3.05042	0	1.36907	7.2245	11.4394	2.3909e-10	5.60801e-08	13.9275	1	ILMN_2179717	C9orf61	ILMN_12054	9413	37674229	NM_004816.2	NP_004807.2	2000390	S	2169	TAGTTGCCTTTGGCCTTTCACTGCTCTGCGATTTGGCAGGAAATAAGGCG	+	71196936-71196985	0	0	0	FAM189A2	family with sequence similarity 189, member A2	unknown	other	-	-	-	-	-	-
PUF60	-0.800816	11.3274	-5.86218	8.95501e-06	0.000417006	3.51004	1	-0.231883	11.3274	-1.69744	0.104769	0.431109	-5.66597	0	ILMN_1779404	PUF60	ILMN_14897	22827	17978510	NM_014281.3	NP_055096.2	5050082	A	1686	CTGCGTGACAGTGGTCCCTCTCCCCGGACTTGCACTTGTTCCTTGTTTCC	-	144970635-144970677:144970678-144970684	0	0	0	PUF60	poly-U binding splicing factor 60KDa	Nucleus	other	-0.366352	0.0654326	d	-0.1848	0.364304	X
RAB3IL1	-0.746992	9.54619	-3.92736	0.000804255	0.0145092	-0.937501	1	-1.85326	9.54619	-9.74368	3.91378e-09	5.48852e-07	11.1477	1	ILMN_1741632	RAB3IL1	ILMN_25234	5866	21361439	NM_013401.2	NP_037533.2	3460161	S	2188	AGCTCCCACCTGGACGCATCCCTCACCACGTCCGGATTTCCTTCTTTGGA	-	61421395-61421444	0	0	0	RAB3IL1	RAB3A interacting protein (rabin3)-like 1	unknown	other	-0.234663	0.612529	d	-1.2133	0.00955355	2
RAB3IP	0.624119	8.2326	6.73232	1.33137e-06	9.65023e-05	5.40769	1	0.655063	8.2326	7.06611	6.57678e-07	3.53091e-05	6.0058	1	ILMN_1803197	RAB3IP	ILMN_41605	117177	90855775	NM_175624.2	NP_783323.1	1990390	A	1480	GGAACTCTGATGCTCTGCGTGGGACCATGCCTGAACTCCCCGAATAACTG	+	68495484-68495533	0	0	0	RAB3IP	RAB3A interacting protein (rabin3)	Cytoplasm	other	0.242186	0.207704	d	0.310445	0.108554	d
RAI14	0.754416	8.49413	3.44737	0.00248293	0.0342294	-2.03302	1	1.47856	8.49413	6.75641	1.26467e-06	6.06272e-05	5.34813	1	ILMN_1682139	RAI14	ILMN_4560	26064	13470085	NM_015577.1	NP_056392.1	6370187	S	4654	TGTCACAGCACTTCAGAAAATACACAACAGCCCCTTCTGCCCCCGCACAG	+	34868227-34868276	0	0	0	RAI14	retinoic acid induced 14	Nucleus	transcription regulator	0.453726	0.25109	d	1.29059	0.0050278	2
RARA	0.726435	9.77172	3.41259	0.00269238	0.0365185	-2.11118	1	0.177132	9.77172	0.832116	0.414948	0.796056	-6.71442	0	ILMN_1659206	RARA	ILMN_12571	5914	75812906	NM_000964.2	NP_000955.1	7050600	A	3180	CCTGGAGCCCGTGGGTGCACCTGTTACTGTTGGGCTTTCCACTGAGATCT	+	35767340-35767389	0	0	0	RARA	retinoic acid receptor, alpha	Nucleus	ligand-dependent nuclear receptor	0.0995447	0.541482	d	0.0242746	0.902919	X
RASAL1	-0.92151	8.70611	-3.55111	0.00194867	0.0284473	-1.7987	1	0.400748	8.70611	1.54431	0.137836	0.497719	-5.89479	0	ILMN_1793517	RASAL1	ILMN_23427	8437	4759025	NM_004658.1	NP_004649.1	3930446	S	2979	GACTGGGGTCTCTACTTCACCAAACTGGCCTCTATCCATACCAAGGAGGC	-	112021796-112021845	0	0	0	RASAL1	RAS protein activator like 1 (GAP1 like)	unknown	other	-0.404979	0.0882695	d	0.652915	0.0120494	X
ASMTL	0.484495	9.50581	2.41164	0.025376	0.182628	-4.23006	0	0.895861	9.50581	4.45928	0.000228947	0.00438848	0.143355	1	ILMN_1689786	ASMTL	ILMN_15304	8623	4757793	NM_004192.1	NP_004183.1	6760619	A	1835	ATGCCATCTTGCCACCAAAGTGGCCCCCTGAAGCCCAGGCAGCATGTTCA	-	1504490-1504539	0	0	0	ASMTL	acetylserotonin O-methyltransferase-like	unknown	enzyme	0.938596	0.00136586	X	0.899945	0.00116289	2
RASSF7	-0.789198	9.29326	-3.90325	0.000851351	0.0151571	-0.993101	1	-0.510574	9.29326	-2.52522	0.019906	0.149961	-4.18157	0	ILMN_1733110	RASSF7	ILMN_12457	8045	24475884	NM_003475.2	NP_003466.1	4390273	S	1473	ACAGCAAGAGCATGTGTGTGCCACTTCCCCTACCCCAACGTGAAAACCTC	+	553961-554010	0	0	0	RASSF7	Ras association (RalGDS/AF-6) domain family (N-terminal) member 7	unknown	other	-0.460687	0.0562554	d	-0.332148	0.162055	X
RERE	-0.902711	9.96509	-5.28983	3.29216e-05	0.00117488	2.21566	1	-0.651866	9.96509	-3.81989	0.00103631	0.0150518	-1.3464	1	ILMN_1802380	RERE	ILMN_172492	473	112382225	NM_001042682.1	NP_001036147.1	10008	S	5965	GCCCTGACCTTCATGGTGTCTTTGAAGCCCAACCACTCGGTTTCCTTCGG	-	8335344-8335393	0	0	1	RERE	arginine-glutamic acid dipeptide (RE) repeats	Nucleus	other	-0.459169	0.0844859	d	-0.172469	0.55618	d
ATF5	-0.159909	11.0753	-0.731058	0.473031	0.818859	-6.60944	0	1.82834	11.0753	8.35863	4.93325e-08	4.20161e-06	8.60947	1	ILMN_1669113	ATF5	ILMN_6490	22809	142361424	NM_012068.3	NP_036200.2	1570484	S	1901	CAGTGTTTCGTGAAGGTGTTGGAGAGGGGCTGTGTCTGGGTGAGGGATGG	+	55128896-55128945	0	0	0	ATF5	activating transcription factor 5	Nucleus	transcription regulator	-0.385711	0.280025	X	2.14451	0.000180216	2
RERE	-0.634383	8.73218	-4.74721	0.000116304	0.0031341	0.964787	1	-0.522893	8.73218	-3.91291	0.000832166	0.012624	-1.13108	0	ILMN_2327795	RERE	ILMN_172583	473	112382215	NM_012102.3	NP_036234.3	1230347	A	7778	GCGCTGAGATTCTTCCATCTAAAAAACCCTCGACCCGAAACCCTCACCAG	-	8335417-8335466	0	0	0	RERE	arginine-glutamic acid dipeptide (RE) repeats	Nucleus	other	-0.459169	0.0844859	d	-0.172469	0.55618	X
ATG7	-0.0439743	10.7364	-0.338994	0.738068	0.931636	-6.82376	0	-0.647127	10.7364	-4.98865	6.61476e-05	0.00156478	1.37898	1	ILMN_1790978	ATG7	ILMN_17242	10533	5453667	NM_006395.1	NP_006386.1	5220754	S	2288	GGCCAGTGTTCGGCGTTGCTCGGGATTCAAGATACCACCAGTTCAGAGCT	+	11571483-11571532	0	0	0	ATG7	ATG7 autophagy related 7 homolog (S. cerevisiae)	Cytoplasm	enzyme	-0.110004	0.652026	X	-0.528471	0.0211267	2
ATHL1	-0.537226	8.58842	-1.50442	0.147752	0.509062	-5.76968	0	-1.62423	8.58842	-4.54841	0.000185573	0.00368143	0.351835	1	ILMN_1794707	ATHL1	ILMN_6638	80162	115357967	NM_025092.3	NP_079368.2	3310278	S	2257	AATCCCAGGCTCCTCTTGACTCTGGGCAGCTTTAATCAGGTTGGGCAGCC	+	285278-285327	0	0	0	ATHL1	ATH1, acid trehalase-like 1 (yeast)	unknown	other	-0.24608	0.551486	X	-0.446483	0.250121	d
RNF165	1.77266	7.65766	5.74136	1.17533e-05	0.000517207	3.23948	1	3.63825	7.65766	11.7837	1.4068e-10	3.6134e-08	14.4516	1	ILMN_1792389	RNF165	ILMN_14516	494470	57165360	NM_152470.2	NP_689683.2	10019	S	4737	CTGTAGCAACGTCTGTCAGGCCCCCTTGTGTTTCATCTCCTGCGCGCGTA	+	42294242-42294291	0	0	0	RNF165	ring finger protein 165	unknown	other	0.487863	0.16364	d	1.79304	0.000442692	2
RPLP1	-0.607834	11.7985	-4.23086	0.00039261	0.00828679	-0.234741	1	-0.726345	11.7985	-5.05576	5.65852e-05	0.00137867	1.53486	1	ILMN_2386530	RPLP1	ILMN_23085	6176	47524166	NM_213725.1	NP_998890.1	6380639	A	177	GCACGACGATGAGGTGACAGTCACGGCCCTGGCCAACGTCAACATTGGGA	+	67532389-67532413:67534563-67534587	0	0	0	RPLP1	ribosomal protein, large, P1	Cytoplasm	other	-0.248166	0.209542	d	-0.577121	0.00911222	2
RPS6KA2	-0.597258	9.96167	-3.40757	0.00272403	0.0368555	-2.12245	1	-1.74147	9.96167	-9.9357	2.80599e-09	4.17494e-07	11.4799	1	ILMN_1702501	RPS6KA2	ILMN_12251	6196	55743135	NM_001006932.1	NP_001006933.1	5360424	A	5502	GCAGCATCTGTGTCGTTCTACTGAGCACGCTTCTCTGCCTCGCTCCTGAC	-	166743027-166743076	0	0	0	RPS6KA2	ribosomal protein S6 kinase, 90kDa, polypeptide 2	Nucleus	kinase	-0.504046	0.0799473	d	-1.76812	0.000161486	2
CAMTA1	1.00857	7.30714	6.64158	1.61685e-06	0.000111291	5.21427	1	0.991319	7.30714	6.52796	2.06523e-06	8.99889e-05	4.85493	1	ILMN_1661940	CAMTA1	ILMN_179380	23261	54112400	NM_015215.1	NP_056030.1	3930411	S	8151	ACGAACCCCTCTCTGGCTGCACGGTCGCTTATGGCAGTTCCACACAGTAG	+	7752060-7752109	0	0	0	CAMTA1	calmodulin binding transcription activator 1	unknown	other	-	-	-	-	-	-
RPS6KA3	0.847428	7.97857	8.36515	4.87202e-08	7.03444e-06	8.69391	1	0.765094	7.97857	7.55241	2.41753e-07	1.56472e-05	7.01238	1	ILMN_1806294	RPS6KA3	ILMN_181875	6197	56243494	NM_004586.2	NP_004577.1	3370110	A	1102	GATTCACCTGGCATTCCACCTAGTGCTAATGCACATCAGCTTTTTCGGGG	-	20103278-20103327	0	0	0	RPS6KA3	ribosomal protein S6 kinase, 90kDa, polypeptide 3	Cytoplasm	kinase	0.537081	0.0693758	d	1.07462	0.00271322	2
ATOX1	-0.406772	11.7984	-3.00187	0.00692454	0.0745821	-3.01582	0	-0.727275	11.7984	-5.3671	2.75612e-05	0.000762928	2.25411	1	ILMN_1670609	ATOX1	ILMN_8255	475	72004264	NM_004045.3	NP_004036.1	5560131	S	353	ATGCTGATCCTCCCGCTGGCTTCCAGACAGACCTGGGACTTGGCAGTCAT	-	151102662-151102711	0	0	0	ATOX1	ATX1 antioxidant protein 1 homolog (yeast)	Cytoplasm	transporter	-0.341697	0.194961	X	-0.5787	0.0342387	2
SARS2	-0.648325	8.21543	-5.30589	3.17262e-05	0.0011435	2.25239	1	-0.729177	8.21543	-5.96759	7.07357e-06	0.000246751	3.61781	1	ILMN_1655684	SARS2	ILMN_20962	54938	20149644	NM_017827.2	NP_060297.1	4730168	S	1925	CCAGTGGGAAGCAGGACGTCTGGGCTTTACGGTTCTAGGGACAGGAGAAG	-	44097828-44097877	0	0	0	SARS2	seryl-tRNA synthetase 2, mitochondrial	Cytoplasm	enzyme	-0.390133	0.0536015	d	-0.0592039	0.811178	d
SBNO2	1.50989	8.64699	5.14171	4.63546e-05	0.00153265	1.87602	1	0.659121	8.64699	2.24454	0.0359967	0.225537	-4.72571	0	ILMN_1808811	SBNO2	ILMN_24241	22904	154355001	NM_014963.2	NP_055778.2	3190609	S	4643	ATCCGTGAAACCGGGTGGTCCCAAGAGCTAGAAACTCAGGAAACCCCAGG	-	1058865-1058914	0	0	0	SBNO2	strawberry notch homolog 2 (Drosophila)	unknown	transcription regulator	0.160632	0.777153	d	0.691974	0.147225	X
SCAP	-0.848732	10.1881	-5.95104	7.33981e-06	0.000360649	3.708	1	-0.297916	10.1881	-2.08889	0.049406	0.277551	-5.01087	0	ILMN_1677534	SCAP	ILMN_179214	22937	66932901	NM_012235.2	NP_036367.2	3140382	S	4146	AATGCACTGAACCTGGACTTGGGGGAAAGAGCCGAGTATCTTCCAGCCGC	-	47430247-47430296	0	0	0	SCAP	SREBF chaperone	Cytoplasm	other	-0.4949	0.098413	d	-0.403093	0.181212	X
SCARB1	-0.752701	9.58885	-3.54882	0.00195915	0.0285319	-1.80389	1	-1.80172	9.58885	-8.49469	3.80484e-08	3.43223e-06	8.87017	1	ILMN_2183409	SCARB1	ILMN_5375	949	33620766	NM_005505.3	NP_005496.3	1170338	S	2238	AAGTCTTCACAGGCACTGCATCGGGTTGTCTGGCGCCCTTTTCCTCCAGC	-	123828396-123828445	0	0	1	SCARB1	scavenger receptor class B, member 1	Plasma Membrane	transporter	-0.358092	0.212952	d	-0.980284	0.0041069	2
ATP1B3	0.366208	9.42559	2.29554	0.0323861	0.214399	-4.45265	0	0.633161	9.42559	3.96892	0.000729096	0.0113395	-1.0011	1	ILMN_1759628	ATP1B3	ILMN_163124	483	113415255	XM_001133534.1	XP_001133534.1	4220632	A	1252	CCCGGCCAACATCAAGTGACTTTATAGCTGCAAGAAATGTGGTATGTGGA			0	0	0	ATP1B3	ATPase, Na+/K+ transporting, beta 3 polypeptide	Plasma Membrane	transporter	0.432984	0.101967	X	0.70881	0.0139258	2
ATP2A3	0.141262	7.69229	0.588057	0.562927	0.865433	-6.70527	0	1.14515	7.69229	4.76715	0.000110993	0.00240741	0.862991	1	ILMN_2310909	ATP2A3	ILMN_26846	489	28373108	NM_174955.1	NP_777615.1	3290747	A	4248	CCGAAAGGATGTCACTAAGGATGGCTGATTCCCCAAGGGCACCCGCTCTC	-	3774406-3774455	0	0	0	ATP2A3	ATPase, Ca++ transporting, ubiquitous	Cytoplasm	transporter	0.0545758	0.919582	X	1.07954	0.0149626	2
SCN1B	1.47414	7.56777	6.14362	4.78479e-06	0.00025632	4.13394	1	0.468342	7.56777	1.95186	0.0647734	0.328526	-5.25087	0	ILMN_1801302	SCN1B	ILMN_14092	6324	47157334	NM_001037.3	NP_001028.1	6560154	A	557	CGTCTACCGCCTGCTCTTCTTCGAAAACTACGAGCACAACACCAGCGTCG	+	40216401-40216450	0	0	0	SCN1B	sodium channel, voltage-gated, type I, beta	Plasma Membrane	ion channel	0.340569	0.103071	d	0.190138	0.383608	X
SDF2L1	-0.600381	10.9701	-3.35841	0.00305369	0.0400392	-2.23254	1	-0.561596	10.9701	-3.14145	0.00503721	0.0533592	-2.88192	0	ILMN_1749213	SDF2L1	ILMN_29496	23753	56243532	NM_022044.2	NP_071327.2	3120079	S	796	GCAGGGCCACTCTTGGCAGAGACTTTGGGTTTGTAGGGGTCCTCAAGTGC	+	20328510-20328559	0	0	0	SDF2L1	stromal cell-derived factor 2-like 1	Cytoplasm	other	-0.440097	0.201219	d	-0.453728	0.191152	X
SDS	-0.93381	8.67384	-3.82245	0.00103009	0.0174793	-1.17909	1	-0.751711	8.67384	-3.07705	0.00583634	0.0599758	-3.02309	0	ILMN_1811114	SDS	ILMN_22338	10993	33469957	NM_006843.2	NP_006834.2	10068	S	1497	TTGAGGAACCATCTCAGCCATCCTCCCAGGAAGCCCACCCCTGACCCTTA	-	112314691-112314740	0	0	0	SDS	serine dehydratase	Cytoplasm	enzyme	-1.39706	0.0607545	1	-1.09688	0.136174	X
SEMA4D	-0.965797	10.1023	-4.35082	0.000295725	0.00660805	0.0439467	1	0.114922	10.1023	0.517711	0.610211	0.889407	-6.93031	0	ILMN_1687533	SEMA4D	ILMN_24615	10507	33942063	NM_006378.2	NP_006369.2	4880408	S	4324	GGCGCTGTTCCTGCCACTGTCCTGAAGATGTGAATGGGTGGTACGATTTC	-	91182226-91182275	0	0	0	SEMA4D	sema domain, immunoglobulin domain (Ig), transmembrane domain (TM) and short cytoplasmic domain, (semaphorin) 4D	Plasma Membrane	other	-0.312069	0.13632	d	0.0531645	0.842216	X
SIDT2	-0.873341	10.4846	-6.93727	8.61939e-07	6.84084e-05	5.84048	1	-0.673149	10.4846	-5.34707	2.88592e-05	0.000792564	2.20805	1	ILMN_1791912	SIDT2	ILMN_166785	51092	94721339	NM_001040455.1	NP_001035545.1	4890328	S	3809	GGGCTGGGAGATGAGGTGGGTCTGGATCTTTTCTCAGAGCGTCTCCATGC	+	116573261-116573310	0	0	0	SIDT2	SID1 transmembrane family, member 2	Cytoplasm	other	-0.519714	0.0525323	d	-0.391196	0.137555	d
ATP5G1	-0.534068	9.87831	-3.33339	0.00323611	0.041798	-2.28839	0	-0.686858	9.87831	-4.28703	0.000343808	0.00612355	-0.25945	1	ILMN_1676393	ATP5G1	ILMN_1123	516	50659068	NM_001002027.1	NP_001002027.1	5870446	A	478	CTCCATGGGGGGTCACCGGCCTGTTGCTACTGCAACTCCACACCATTCTT	+	44328133-44328182	0	0	0	ATP5G1	ATP synthase, H+ transporting, mitochondrial Fo complex, subunit C1 (subunit 9)	Cytoplasm	transporter	-0.36789	0.081311	X	-0.664284	0.00595596	2
ATP5G2	-0.577482	11.5871	-5.13505	4.70763e-05	0.00154708	1.86069	0	-1.16203	11.5871	-10.3329	1.42915e-09	2.44721e-07	12.1524	1	ILMN_1660577	ATP5G2	ILMN_137008	517	50593531	NM_005176.4	NP_005167.1	7330612	A	215	TCAGCAGCTTGGCAGTCTCATGTCCCCTTACCTCACTTGTCTCTAGCCGC	-	52349338-52349387	0	0	0	ATP5G2	ATP synthase, H+ transporting, mitochondrial Fo complex, subunit C2 (subunit 9)	Cytoplasm	transporter	-0.326669	0.101063	X	-0.717769	0.00303628	2
ATP5I	-0.145196	9.10059	-1.06282	0.300245	0.69855	-6.31272	0	-0.896571	9.10059	-6.56279	1.91559e-06	8.52185e-05	4.93057	1	ILMN_1772506	ATP5I	ILMN_14284	521	51479154	NM_007100.2	NP_009031.1	4560246	I	15	AGGCTTTGCTGGCTTGTGCGGCATCCTGCTCCGTCTGCAGGTTGTGCTTC	-	658058-658107	0	0	0	ATP5I	ATP synthase, H+ transporting, mitochondrial Fo complex, subunit E	Cytoplasm	transporter	-0.298096	0.072637	X	-0.778092	0.000661234	2
ATP5SL	-0.37132	9.61937	-3.23473	0.00406519	0.0498297	-2.50746	0	-0.608385	9.61937	-5.2999	3.21672e-05	0.000864918	2.09945	1	ILMN_1809027	ATP5SL	ILMN_12644	55101	8922302	NM_018035.1	NP_060505.1	1990274	S	1389	CGCCTCCTTCGTGGTTCTTGTTGGTTGTGCTTCTGCCTCTGGACGCCGCA	-	46629317-46629366	0	0	0	ATP5SL	ATP5S-like	Cytoplasm	other	-0.535168	0.0136168	X	-0.253531	0.194761	d
SKP2	-0.620365	9.06225	-6.13983	4.825e-06	0.000257908	4.12561	1	-0.519908	9.06225	-5.1456	4.59396e-05	0.00116163	1.74307	0	ILMN_1665538	SKP2	ILMN_13630	6502	16306593	NM_032637.2	NP_116026.1	1710286	I	1241	AGTGACAAGAGCTGGGGTTAGGATCCGGTTGGACTCTGACATCGGATGCC	+	36219702-36219751	1	0	0	SKP2 (includes EG:27401)	S-phase kinase-associated protein 2 (p45)	Nucleus	other	-0.314563	0.155022	d	-0.161599	0.501091	X
SLAMF6	-0.980402	8.39379	-3.40378	0.00274814	0.0370784	-2.13095	1	-0.855009	8.39379	-2.96844	0.0074692	0.0729023	-3.25869	0	ILMN_2196078	SLAMF6	ILMN_183630	114836	38327616	NM_052931.3	NP_443163.1	7200743	S	2624	GGTGGAGGTTCCAGTGAGCCAAAATCATGCCAATGTATTCCAGTCTGGGT	-	158721503-158721552	0	0	0	SLAMF6	SLAM family member 6	Plasma Membrane	transmembrane receptor	-0.333663	0.120944	d	-0.182538	0.423317	X
ATP6V0A2	0.101697	8.47733	1.00366	0.327264	0.720402	-6.37299	0	0.701088	8.47733	6.91911	8.95584e-07	4.591e-05	5.69523	1	ILMN_1700380	ATP6V0A2	ILMN_23163	23545	42741678	NM_012463.2	NP_036595.2	620092	S	4415	GCCCGCATCCTCCTCTATCCTGTTTCGAGGTAGAGAGCTTGGCACTTCTG	+	122810128-122810177	0	0	0	ATP6V0A2	ATPase, H+ transporting, lysosomal V0 subunit a2	Cytoplasm	transporter	0.132527	0.71442	X	0.729255	0.0261005	2
SLC16A5	-0.792716	8.97472	-7.66164	1.93929e-07	2.08921e-05	7.32381	1	-1.31495	8.97472	-12.7091	3.57745e-11	1.18766e-08	15.799	1	ILMN_1755649	SLC16A5	ILMN_9339	9121	20127461	NM_004695.2	NP_004686.1	6860082	A	1767	GCCAAGCAAACGGCTCTGGGCTGGAATAGCCCTACCTGAGTGCCCTGTTT	+	70613685-70613723:70613724-70613734	0	0	0	SLC16A5	solute carrier family 16, member 5 (monocarboxylic acid transporter 6)	Plasma Membrane	transporter	-0.335304	0.367361	d	-0.358191	0.339208	d
ATP6V1H	-0.339799	10.3406	-1.98518	0.0606889	0.31602	-5.01438	0	0.947286	10.3406	5.53427	1.88012e-05	0.000557094	2.63719	1	ILMN_2403730	ATP6V1H	ILMN_18395	51606	47717099	NM_213619.1	NP_998784.1	6330279	A	1595	CTGCTGGCCGTGCAGAAGCTCATGGTGCACAACTGGGAATACCTTGGCAA	-	54791122-54791137:54818690-54818723	0	0	0	ATP6V1H	ATPase, H+ transporting, lysosomal 50/57kDa, V1 subunit H	Cytoplasm	transporter	-0.306324	0.204582	X	0.906687	0.00243607	2
ATP7B	0.126504	7.37833	1.27947	0.215048	0.609784	-6.06617	0	1.28729	7.37833	13.0198	2.29881e-11	8.07099e-09	16.2322	1	ILMN_1722056	ATP7B	ILMN_21935	540	55743070	NM_000053.2	NP_000044.2	7510259	A	6338	ACTCCAGCCCGCAGCACATTTCCGCTGTCCGTCAGTAATTGTGTCCTCTC	-	51405060-51405109	0	0	0	ATP7B	ATPase, Cu++ transporting, beta polypeptide	Cytoplasm	transporter	0.203633	0.322847	X	0.500881	0.0203227	2
ATXN3	-0.552069	9.10578	-5.07287	5.43801e-05	0.00173341	1.71765	0	-0.933906	9.10578	-8.58152	3.22773e-08	3.02341e-06	9.03524	1	ILMN_2393497	ATXN3	ILMN_12637	4287	66932883	NM_030660.2	NP_109376.1	510747	A	842	GAAAGGCCAGCCACCAGTTCAGGAGCACTTGGGAGTGATCTAGGTGATGC	-	91600504-91600511:91607032-91607073	0	0	0	ATXN3	ataxin 3	Nucleus	other	-0.639941	0.00308911	X	-0.346161	0.046028	2
SLC16A6	0.845984	8.59397	4.18158	0.000441108	0.00906779	-0.349136	1	1.43164	8.59397	7.07641	6.43673e-07	3.46717e-05	6.02745	1	ILMN_1729691	SLC16A6	ILMN_14509	9120	141802120	NM_004694.3	NP_004685.2	5900564	S	2316	AAATACCAAGGTTCCCGTTAACAAATTACGGCCTCTGCTTGCTGGAAATG	-	63776226-63776275	0	0	0	SLC16A6	solute carrier family 16, member 6 (monocarboxylic acid transporter 7)	Plasma Membrane	transporter	0.899523	0.119507	1	1.84453	0.0057861	2
AZIN1	0.331269	10.5729	2.28434	0.033149	0.217495	-4.47379	0	0.835909	10.5729	5.76421	1.11625e-05	0.000360764	3.15994	1	ILMN_1656682	AZIN1	ILMN_4825	51582	62526034	NM_015878.4	NP_056962.2	2480039	A	3918	GGTGCAACTTTGAGTCCTTGGCTTGACTATACAGGCCTTGAACTTCATGG	-	103908092-103908141	0	0	0	AZIN1	antizyme inhibitor 1	Cytoplasm	enzyme	0.449123	0.0378474	X	0.668569	0.00538935	2
SLC24A6	-0.872176	10.5632	-4.9708	6.89551e-05	0.00209145	1.48227	1	-0.53808	10.5632	-3.06668	0.00597586	0.0611264	-3.0457	0	ILMN_1701655	SLC24A6	ILMN_164449	80024	39995085	NM_024959.2	NP_079235.2	2360376	S	2794	GGCCTGCGAGCTGGGAAAGGACAGATGAGGGGACCTCGTGCCTTCTTGCT	-	112221086-112221135	0	0	0	SLC24A6	solute carrier family 24 (sodium/potassium/calcium exchanger), member 6	Plasma Membrane	transporter	-0.4754	0.0544538	d	-0.36898	0.129514	X
SLC27A1	-1.00343	9.89958	-5.1386	4.66899e-05	0.001538	1.86887	1	-1.4024	9.89958	-7.18169	5.16958e-07	2.91323e-05	6.24797	1	ILMN_1787718	SLC27A1	ILMN_13268	376497	38524615	NM_198580.1	NP_940982.1	6180608	S	3321	CAGACATCCCTACTGGCTTCGCTGGTGGCTCATCTCGAACATCCACGCCA	+	17477751-17477800	0	0	0	SLC27A1	solute carrier family 27 (fatty acid transporter), member 1	Plasma Membrane	transporter	-0.17959	0.367819	d	-0.0632119	0.791884	d
BAIAP2	0.30775	8.41774	1.74465	0.0960457	0.409328	-5.4115	0	-0.589985	8.41774	-3.34466	0.00315269	0.0371922	-2.43033	1	ILMN_1705922	BAIAP2	ILMN_17382	10458	5453564	NM_006340.1	NP_006331.1	70767	I	1780	CCCCCGCCCTTCCCATGTAGCCTGTTCTGTCATCATCTGTGCGTTCCTGT	+	76704270-76704319	0	0	0	BAIAP2	BAI1-associated protein 2	Plasma Membrane	kinase	0.23622	0.440182	X	-0.368461	0.212112	d
SLC30A3	0.687976	7.67268	4.09583	0.000540209	0.0106132	-0.547966	1	2.68162	7.67268	15.9649	5.07139e-13	4.26487e-10	19.919	1	ILMN_1805807	SLC30A3	ILMN_6028	7781	52630414	NM_003459.4	NP_003450.2	4490475	S	1984	CTGTTTGGGGGTCTATCTCTCCATCCCTCTGTTGGTGCTGTGCCCTTGGC	-	27331003-27331052	0	0	0	SLC30A3	solute carrier family 30 (zinc transporter), member 3	Plasma Membrane	transporter	0.252076	0.270541	d	1.254	0.000284056	2
BANF1	-0.176905	10.4152	-1.18701	0.248819	0.648058	-6.17625	0	-0.678943	10.4152	-4.55563	0.000182442	0.00363854	0.368736	1	ILMN_2179837	BANF1	ILMN_13154	8815	11038645	NM_003860.2	NP_003851.1	150767	S	737	GCTTCGGATGCCTTCGAGAGTGGTGCGACGCCTTCTTGTGATGCTCTCTG	+	65527778-65527819:65527820-65527827	0	0	0	BANF1	barrier to autointegration factor 1	Nucleus	other	-0.192489	0.356039	X	-0.0657988	0.794101	d
CCL3L1	2.12785	10.6009	5.92936	7.70406e-06	0.000374103	3.65979	1	1.44885	10.6009	4.0373	0.000620334	0.00995512	-0.842088	1	ILMN_2218856	CCL3L1	ILMN_6158	6349	48949814	NM_021006.4	NP_066286.1	610524	S	301	GTCTGTGCTGACCCCAGTGAGGAGTGGGTCCAGAAATACGTCAGTGACCT	-	31648387-31648436	0	0	0	CCL3L1/CCL3L3	chemokine (C-C motif) ligand 3-like 1	Extracellular Space	cytokine	-	-	-	-	-	-
CCL3L1	2.37054	10.6999	6.50135	2.1876e-06	0.000140658	4.91323	1	2.32349	10.6999	6.3723	2.89585e-06	0.00011916	4.51509	1	ILMN_1747355	CCL3L1	ILMN_6158	6349	48949814	NM_021006.4	NP_066286.1	4250053	S	135	CTGCAACCAGGTCCTCTCTGCACCACTTGCTGCTGACACGCCGACCGCCT	-	31648974-31648998:31649684-31649708	0	0	0	CCL3L1/CCL3L3	chemokine (C-C motif) ligand 3-like 1	Extracellular Space	cytokine	-	-	-	-	-	-
CCL3L1	2.73473	8.31701	9.58467	5.17247e-09	1.21573e-06	10.9067	1	0.671833	8.31701	2.35464	0.0286204	0.193239	-4.51658	0	ILMN_1773245	CCL3L1	ILMN_6158	6349	48949814	NM_021006.4	NP_066286.1	6660288	S	1	GAAGGACGCAGGCAGCAAAGAGTAGTCAGTCCCTTCTTGGCTCTGCTGAC	-	31649793-31649842	0	0	0	CCL3L1/CCL3L3	chemokine (C-C motif) ligand 3-like 1	Extracellular Space	cytokine	-	-	-	-	-	-
CCL3L3	1.59171	12.2134	5.42962	2.38799e-05	0.000909253	2.53461	1	2.08381	12.2134	7.10828	6.02249e-07	3.28391e-05	6.09437	1	ILMN_2105573	CCL3L3	ILMN_22857	414062	93589093	NM_001001437.3	NP_001001437.2	2810010	S	432	CATGCGTGTGACCTCCACAGCTACCTCTTCTATGGACTGGTTATTGCCAA	-	31546668-31546717	0	0	0	CCL3L1/CCL3L3	chemokine (C-C motif) ligand 3-like 1	Extracellular Space	cytokine	-	-	-	-	-	-
CCL4L1	1.5048	8.48943	3.7927	0.00110489	0.0185229	-1.24742	1	1.29093	8.48943	3.25366	0.00389152	0.0438297	-2.63365	1	ILMN_2100209	CCL4L1	ILMN_4819	9560	48949791	NM_001001435.2	NP_001001435.1	3520102	S	572	TCTCACTCTTTCTCTGCTGTTGCAAATACATGGATAACACCGTTAATTCC	+	31564301-31564350	0	0	0	CCL4L1/CCL4L2	chemokine (C-C motif) ligand 4-like 1	unknown	other	-	-	-	-	-	-
CCL4L2	1.75423	11.1602	3.79165	0.00110761	0.018556	-1.24982	1	2.81271	11.1602	6.07949	5.51477e-06	0.000201446	3.86781	1	ILMN_1716276	CCL4L2	ILMN_10018	388372	48949836	NM_207007.2	NP_996890.1	2970575	S	212	AACTTTGTGGTAGATTACTATGAGACCAGCAGCCTCTGCTCCCAGCCAGC	+	31664916-31664965	0	0	0	CCL4L1/CCL4L2	chemokine (C-C motif) ligand 4-like 1	unknown	other	-	-	-	-	-	-
SLC45A3	-0.979973	8.27051	-6.52015	2.10039e-06	0.000136483	4.95375	1	-0.936274	8.27051	-6.22941	3.9602e-06	0.000153385	4.20049	1	ILMN_1726114	SLC45A3	ILMN_12972	85414	93277086	NM_033102.2	NP_149093.1	1340746	S	3113	GCTACTGCAGGACCAGAAGCACAAAGTGCGGTTTCCCAAGCCTTTGTCCA	-	203893823-203893872	0	0	0	SLC45A3	solute carrier family 45, member 3	Cytoplasm	other	-0.295165	0.073492	d	-0.336445	0.044458	2
SLC6A6	0.661146	8.35965	5.62662	1.52387e-05	0.000631842	2.98116	1	0.242137	8.35965	2.06068	0.0522718	0.287368	-5.06116	0	ILMN_1673586	SLC6A6	ILMN_25763	6533	110082729	NM_003043.3	NP_003034.2	2810280	S	4458	GGAAGTCGTTCCTCAACTCTCCCCAAGGCACCTGTCTCCAATCAGAGCCC	+	14503811-14503860	0	0	0	SLC6A6	solute carrier family 6 (neurotransmitter transporter, taurine), member 6	Plasma Membrane	transporter	0.247798	0.193848	d	0.0381513	0.877113	X
BBS4	-0.322849	8.49736	-2.10915	0.0474366	0.273868	-4.79621	0	-0.822102	8.49736	-5.37073	2.73328e-05	0.000758326	2.26244	1	ILMN_1762466	BBS4	ILMN_26103	585	25952121	NM_033028.2	NP_149017.2	2470753	S	2228	CTAGATCCTATCAGGATGAGGAGCAGCAGCCCAGGGCTTGTCTGGATCAG	+	70817615-70817664	0	0	0	BBS4	Bardet-Biedl syndrome 4	Cytoplasm	other	-0.151079	0.597771	X	-0.775393	0.00834277	2
SLC7A11	1.29878	9.27353	7.44925	2.98138e-07	2.87777e-05	6.89648	1	2.18187	9.27353	12.5143	4.74161e-11	1.45534e-08	15.5225	1	ILMN_1655229	SLC7A11	ILMN_23296	23657	80861465	NM_014331.3	NP_055146.1	2750128	S	1629	CAGGGATTGGCTTCGTCATCACTCTGACTGGAGTCCCTGCGTATTATCTC	-	139319866-139319915	0	0	0	SLC7A11	solute carrier family 7 (anionic amino acid transporter light chain, xc- system), member 11	Plasma Membrane	transporter	0.409978	0.118953	d	2.17948	3.37847e-05	2
BCAR3	-0.28672	8.44225	-2.12404	0.0460335	0.268852	-4.76942	0	-0.624213	8.44225	-4.62422	0.000155248	0.00317616	0.529121	1	ILMN_1763638	BCAR3	ILMN_12475	8412	62243893	NM_003567.2	NP_003558.1	4070053	S	2671	GCCCTCTCGCGTAAATTGGAACCTCCTCCTGTAAAGCAGGCAGAGCTTTG	-	93800386-93800435	0	0	0	BCAR3	breast cancer anti-estrogen resistance 3	Cytoplasm	other	-0.764786	0.0207974	X	-1.26171	0.00141152	2
CCPG1	0.137464	9.25822	0.878546	0.389846	0.769413	-6.49008	0	0.833708	9.25822	5.32832	3.01306e-05	0.000818728	2.1649	1	ILMN_1794190	CCPG1	ILMN_182875	9236	75677573	NM_020739.2	NP_065790.2	6220674	A	6166	TGTGGGTTCAAGAGCCCTCTGACTTGTGAAGAATTTGCTGCCCTCTTAAG	-	53435212-53435261	0	0	0	CCPG1	cell cycle progression 1	unknown	other	-	-	-	-	-	-
SLC9A9	-0.596066	9.36522	-3.52386	0.00207691	0.0297732	-1.8604	1	-0.302631	9.36522	-1.78911	0.0884087	0.392847	-5.52122	0	ILMN_1758315	SLC9A9	ILMN_20716	285195	27734934	NM_173653.1	NP_775924.1	510128	S	3223	GCTCCAGGCCTAGGTGCCCAGGCTATGATGAGTCTGCTTTTGAAGGAGGT	-	144467024-144467073	0	0	0	SLC9A9	solute carrier family 9 (sodium/hydrogen exchanger), member 9	Cytoplasm	transporter	-0.755113	0.0864521	1	-0.228576	0.64916	X
SNX29	-0.594991	8.87917	-6.1045	5.21735e-06	0.000272027	4.04778	1	-1.48036	8.87917	-15.1882	1.30441e-12	8.60239e-10	19.0149	1	ILMN_1659761	SNX29	ILMN_162514	92017	154091027	NM_001080530.2	NP_001073999.2	1660047	S	6692	CCCATGATCGGCTCCCAGTGCACCCCCTTAAGGGTAAGCAGGCCACATAT	+	12575336-12575385	0	0	0	SNX29	sorting nexin 29	unknown	other	-0.548454	0.0837463	d	-1.57637	0.000496243	2
SPECC1L	-0.618592	10.5687	-6.3067	3.34231e-06	0.000196995	4.49118	1	0.0570872	10.5687	0.582018	0.566911	0.870677	-6.89403	0	ILMN_1779185	SPECC1L	ILMN_168707	23384	51036581	NM_015330.1	NP_056145.1	6020209	S	6094	GCAAAAGGGCCAGTCGCGTTTCTATTTCTCTCGATCCCAGGCTTCTGCGG	+	23143104-23143153	0	0	0	SPECC1L	sperm antigen with calponin homology and coiled-coil domains 1-like	unknown	other	-0.35682	0.0571253	d	0.193839	0.305472	X
SPHK2	-0.848145	10.3086	-4.55292	0.000183611	0.00450961	0.513694	1	0.279609	10.3086	1.50097	0.148635	0.515429	-5.95648	0	ILMN_1729281	SPHK2	ILMN_8059	56848	21361698	NM_020126.3	NP_064511.2	3800725	S	2868	CATATCCCCTGTTCGTCTCATGCGCGTCCTCCGTCCCCAATCTAAAAAGC	+	53825379-53825428	0	1	0	SPHK2	sphingosine kinase 2	Cytoplasm	kinase	-0.315739	0.138858	d	0.125339	0.603557	X
SRGAP1	0.748737	8.00502	4.73395	0.000119978	0.00321007	0.934032	1	0.0378764	8.00502	0.239476	0.813119	0.955613	-7.03914	0	ILMN_1677432	SRGAP1	ILMN_7756	57522	44917603	NM_020762.1	NP_065813.1	2470220	S	4191	CCCTGTGTTCTCCTCTGTGGAAATGAAGGCAGCAAGAAGCACCTGAGGCC	+	62823596-62823645	0	0	0	SRGAP1	SLIT-ROBO Rho GTPase activating protein 1	Cytoplasm	other	0.569669	0.0808126	d	0.422346	0.195934	X
SRGN	0.733593	12.7045	5.1095	4.99483e-05	0.00162559	1.80195	1	1.20243	12.7045	8.375	4.78091e-08	4.10872e-06	8.64096	1	ILMN_2169152	SRGN	ILMN_2142	5552	45935370	NM_002727.2	NP_002718.2	360500	S	188	GTACCAATGGGTGCGCTGCAATCCAGACAGTAATTCTGCAAACTGCCTTG	+	70526868-70526917	0	0	0	SRGN	serglycin	Extracellular Space	other	0.355414	0.05688	d	0.827356	0.000857858	2
SRGN	0.604041	13.3237	4.70185	0.000129364	0.00340702	0.85957	1	1.14251	13.3237	8.89329	1.80246e-08	1.87156e-06	9.6195	1	ILMN_1760347	SRGN	ILMN_2142	5552	45935370	NM_002727.2	NP_002718.2	7550484	S	482	CCTTAGGTCTCTTGACAGGAATCTGCCCTCAGACAGCCAGGACTTGGGTC	+	70533801-70533850	0	0	0	SRGN	serglycin	Extracellular Space	other	0.355414	0.05688	d	0.827356	0.000857858	2
SRRM1	-0.616534	10.5449	-5.36492	2.76999e-05	0.00102799	2.38718	1	-0.01445	10.5449	-0.12574	0.901165	0.97907	-7.06073	0	ILMN_1697670	SRRM1	ILMN_177818	10250	115648109	NM_005839.3	NP_005830.2	6290392	S	3755	CAACTTTCAGAGCCTCTTGTATTTGGAAGGCTGGAAGGGCCCAGACTTTG	+	24872180-24872229	0	0	0	SRRM1	serine/arginine repetitive matrix 1	Nucleus	other	-0.286398	0.103382	d	-0.209089	0.241004	X
SSH2	-0.693529	9.72094	-4.37077	0.000282117	0.00635342	0.0903226	1	0.385813	9.72094	2.43148	0.0243294	0.172928	-4.36726	0	ILMN_1672834	SSH2	ILMN_8279	85464	37674209	NM_033389.2	NP_203747.2	2810468	S	8875	GTCCAGAAGACTCTCCTCTGACTGTTACCTTTGCCCCAAGCCACCCCAAA	-	24977332-24977381	0	0	0	SSH2	slingshot homolog 2 (Drosophila)	Cytoplasm	phosphatase	-0.445251	0.0930011	d	0.223127	0.424703	X
SSH3	-0.714028	8.8417	-5.45179	2.26981e-05	0.000874015	2.58505	1	-0.499041	8.8417	-3.81031	0.00105997	0.0153452	-1.36853	0	ILMN_1755234	SSH3	ILMN_179016	54961	24586674	NM_017857.2	NP_060327.2	540608	A	2647	TGTGACACCACGCCAGATCACAGGGCACCAGGCCAGAGATAGTCTTCTTT	+	66836505-66836554	0	0	0	SSH3	slingshot homolog 3 (Drosophila)	Cytoplasm	phosphatase	-0.358863	0.0973198	d	-0.241811	0.273359	X
STEAP3	-0.672903	9.10824	-4.49748	0.000209229	0.00500284	0.384847	1	0.436493	9.10824	2.91738	0.00838108	0.0796987	-3.3683	0	ILMN_2383349	STEAP3	ILMN_28415	55240	59853424	NM_018234.2	NP_060704.2	1300762	A	3720	CTGGCAGCAGCATCCCGAGAGCACATCATCTCCACAGCCTGGTAAATTCC	+	119739480-119739529	0	0	0	STEAP3	STEAP family member 3, metalloreductase	Cytoplasm	transporter	-0.488796	0.0916532	d	0.342939	0.242235	X
BLVRA	0.369041	9.22579	1.7934	0.0877003	0.390265	-5.33397	0	-0.976246	9.22579	-4.7442	0.000117129	0.00252144	0.809418	1	ILMN_1691436	BLVRA	ILMN_21946	644	40353771	NM_000712.3	NP_000703.2	2940022	S	883	CTGAGAAGGAACTGGCTGCTGAAAAGAAACGCATCCTGCACTGCCTGGGG	+	43813268-43813317	0	0	0	BLVRA	biliverdin reductase A	Cytoplasm	enzyme	0.561928	0.0229069	X	-1.62005	7.96808e-05	2
SYN1	0.741307	7.22336	4.4366	0.000241528	0.00563705	0.243326	1	0.347698	7.22336	2.08091	0.050202	0.280155	-5.02514	0	ILMN_2407703	SYN1	ILMN_22497	6853	91984783	NM_006950.3	NP_008881.2	2120360	A	3038	ATATGTGGTCCTCGTTCATCGTGCCGCCTGTGGTGATGCGTGCAGTGACG	-	47316366-47316415	0	0	0	SYN1	synapsin I	Plasma Membrane	transporter	0.0630445	0.814664	d	0.242617	0.28391	X
TAGLN	-0.677176	8.92706	-4.73831	0.000118758	0.00318266	0.944139	1	-0.519304	8.92706	-3.63365	0.00160596	0.02149	-1.77488	0	ILMN_1778668	TAGLN	ILMN_2335	6876	48255904	NM_003186.3	NP_003177.2	650678	A	1022	GATGTGGGCCAAGTCCACTGTCCTCCTTGGCGGCAAAAGCCCATTGAAGA	+	116580580-116580629	0	0	0	TAGLN	transgelin	Cytoplasm	other	-0.143804	0.316706	d	-0.287545	0.0472853	X
TGFA	0.698699	7.58665	4.51563	0.000200465	0.00483833	0.427048	1	1.816	7.58665	11.7367	1.51145e-10	3.84175e-08	14.3808	1	ILMN_1805175	TGFA	ILMN_307525	7039	153791413	NM_001099691.1	NP_001093161.1	3420296	S	3691	ACCCCTGCCCTCTAGTTGGTTCTGGGCTTTGATCTCTTCCAACCTGCCCA	-	70528444-70528493	0	0	0	TGFA	transforming growth factor, alpha	Extracellular Space	growth factor	0.24438	0.407861	d	1.00766	0.00337068	2
TMC6	-0.979413	9.44033	-6.60076	1.76512e-06	0.00011879	5.1269	1	-1.85042	9.44033	-12.471	5.05036e-11	1.53086e-08	15.4605	1	ILMN_1794677	TMC6	ILMN_19035	11322	34222212	NM_007267.5	NP_009198.3	4290209	S	2623	GACCCTGCTGGGACACCAGGACAAGGAAGACAGTTTCGCCTCTCGAAAGC	-	73620710-73620759	0	0	0	TMC6	transmembrane channel-like 6	Cytoplasm	transporter	-0.303408	0.0647013	d	-0.236793	0.145388	d
BNC2	-0.0709082	7.63995	-0.854543	0.402697	0.778443	-6.51089	0	-0.905669	7.63995	-10.9146	5.49278e-10	1.10768e-07	13.1032	1	ILMN_1656373	BNC2	ILMN_176600	54796	94721326	NM_017637.5	NP_060107.3	7050010	S	5681	TGTCTAGGAGCTTTATCTTTTCACCTCCTTCAGAGGATGCTATGGGGTCC	-	16406696-16406745	0	0	0	BNC2	basonuclin 2	Nucleus	other	-0.0958217	0.856915	X	-1.74979	0.00152705	2
TMEM119	-1.16491	9.98339	-4.38673	0.000271685	0.00617262	0.127421	1	-1.09019	9.98339	-4.10536	0.000528178	0.00869347	-0.683577	1	ILMN_1738116	TMEM119	ILMN_30233	338773	32171198	NM_181724.1	NP_859075.1	3830762	S	2402	GTCTGGCAGCCTGTGTCCACAATATTCGTCAGTCCTCGACAGGGAGCCTG	-	107507890-107507939	0	0	0	TMEM119	transmembrane protein 119	unknown	other	-0.269038	0.373518	d	-0.813877	0.011881	2
BPHL	-0.232325	8.56248	-2.6158	0.0163577	0.136928	-3.82441	0	-0.937711	8.56248	-10.5579	9.82934e-10	1.7966e-07	12.525	1	ILMN_1657746	BPHL	ILMN_27041	670	4757861	NM_004332.1	NP_004323.1	1740487	S	1052	GTCTTGGTGGTTCCTTCGTGTGGGGCTTGATCGTGTTGCTGCCTGTTAAC	+	3097823-3097872	0	0	0	BPHL	biphenyl hydrolase-like (serine hydrolase)	Cytoplasm	enzyme	-0.476224	0.02997	X	-1.07869	0.000391618	2
TMEM138	-0.813747	11.2368	-3.76098	0.00119059	0.0196167	-1.32019	1	0.262335	11.2368	1.21246	0.239148	0.644211	-6.32992	0	ILMN_1664761	TMEM138	ILMN_5258	51524	142384520	NM_016464.3	NP_057548.1	6290598	S	996	GGACAGAAGGACCTCCCAGCCCCCAAAGGATCTCCCAGTGACCAAAGGAT	+	60893088-60893137	0	0	0	TMEM138	transmembrane protein 138	unknown	other	-0.432477	0.0669571	d	0.21312	0.379837	X
TMEM180	-0.591762	8.18123	-6.73806	1.31514e-06	9.56508e-05	5.41989	1	-0.145047	8.18123	-1.65157	0.113884	0.449948	-5.73625	0	ILMN_1808566	TMEM180	ILMN_16656	79847	74027271	NM_024789.3	NP_079065.2	3870193	S	2741	CTCCTCTGCTGCAGGGCTCCCCCACCCCCACACGGCCTCTAAAGATGTTT	+	104226699-104226748	0	0	0	TMEM180	transmembrane protein 180	unknown	other	-0.445709	0.1091	d	-0.0538499	0.881306	X
TNFRSF21	1.07582	10.8819	3.70456	0.00135959	0.0217472	-1.44935	1	-1.68164	10.8819	-5.7907	1.05159e-05	0.000344137	3.21981	1	ILMN_1699695	TNFRSF21	ILMN_9651	27242	23238206	NM_014452.3	NP_055267.1	3780092	S	3356	ATAGGTCCAATCTGCTCTCAAGGCCTTGGTCCTGGTGGGATTCCTTCACC	-	47307455-47307504	0	0	1	TNFRSF21	tumor necrosis factor receptor superfamily, member 21	Plasma Membrane	other	1.10202	0.105558	1	-1.65935	0.021659	2
CD58	0.19455	9.32499	0.968159	0.344268	0.733763	-6.40766	0	0.697034	9.32499	3.46872	0.00236233	0.02947	-2.1506	1	ILMN_1785268	CD58	ILMN_29684	965	4502676	NM_001779.1	NP_001770.1	3610035	S	367	GTGCTTGAGTCTCTTCCATCTCCCACACTAACTTGTGCATTGACTAATGG	-	116880330-116880373:116888456-116888461	0	0	0	CD58	CD58 molecule	Plasma Membrane	other	-	-	-	-	-	-
CD58	0.0693841	9.15184	0.356095	0.725414	0.926917	-6.81763	0	0.958573	9.15184	4.91961	7.76993e-05	0.00178652	1.21839	1	ILMN_2147517	CD58	ILMN_29684	965	4502676	NM_001779.1	NP_001770.1	5900594	S	620	CCTGTATCCCAAGCAGCGGTCATTCAAGACACAGATATGCACTTATACCC	-	116866096-116866128:116880110-116880126	0	0	0	CD58	CD58 molecule	Plasma Membrane	other	-	-	-	-	-	-
TNPO1	0.678657	8.85149	4.47223	0.00022206	0.00527089	0.326161	1	0.313149	8.85149	2.06359	0.0519692	0.28635	-5.05599	0	ILMN_1837935	TNPO1	ILMN_29083	3842	133904027	NM_153188.2	NP_694858.1	2470020	S	7881	GGTCCCCTTCTAATATTGGCCTCATAAAGGGGTTCCACTGTACTTTCCGC	+	72245306-72245355	0	0	0	TNPO1	transportin 1	Nucleus	transporter	0.436719	0.0558549	d	0.402094	0.0755659	X
BST2	0.186614	10.3932	1.13359	0.270074	0.669858	-6.23658	0	-0.655278	10.3932	-3.98049	0.000709446	0.0111005	-0.97422	1	ILMN_1723480	BST2	ILMN_21302	684	7262372	NM_004335.2	NP_004326.1	4900674	S	827	GCATGGGGTGCGGTGTGGGGGGCATGTGCTGCCTGTTGTTATGGGTTTTT	-	17374817-17374866	0	0	0	BST2	bone marrow stromal cell antigen 2	Plasma Membrane	other	0.179646	0.56829	X	-0.760109	0.0152528	2
TNS1	0.677743	8.20404	6.11987	5.04279e-06	0.00026634	4.08166	1	-0.803733	8.20404	-7.25754	4.41843e-07	2.55787e-05	6.4059	1	ILMN_1807919	TNS1	ILMN_27797	7145	66529406	NM_022648.3	NP_072174.3	6250110	S	6954	TGTCACCCTTTCTGCCTTGGTTTCCCTAGCTGAGCCACGCTGCCCATGCA	-	218375994-218376043	0	0	0	TNS1	tensin 1	Plasma Membrane	other	0.317533	0.0899212	d	-0.715016	0.00216855	2
BTBD6	-0.0994319	9.18488	-0.816624	0.423548	0.790589	-6.54269	0	-0.589943	9.18488	-4.84514	9.24665e-05	0.00207188	1.04492	1	ILMN_1744725	BTBD6	ILMN_28665	90135	30794221	NM_033271.1	NP_150374.1	6900307	S	1678	CATTTTCCACACAGCCAGAACCCAGGGATTGGAGTCTTAGGCATCTCTGG	+	104788196-104788245	0	0	0	BTBD6	BTB (POZ) domain containing 6	unknown	other	-0.310008	0.116172	X	-1.01478	0.000431271	2
TOB1	0.657372	8.59039	4.92267	7.71464e-05	0.00226528	1.37107	1	0.67175	8.59039	5.03034	6.0031e-05	0.00144388	1.47584	1	ILMN_1672004	TOB1	ILMN_13735	10140	22035666	NM_005749.2	NP_005740.1	4390300	S	892	CCAATGGAATGTTCCCAGGTGACAGCCCCCTTAACCTCAGTCCTCTCCAG	-	46295471-46295520	0	0	0	TOB1	transducer of ERBB2, 1	Nucleus	transcription regulator	0.652936	0.230818	1	1.02759	0.0629395	1
TPCN1	-0.683659	8.82203	-4.33749	0.000305183	0.00677595	0.0129642	1	-1.06265	8.82203	-6.74199	1.30418e-06	6.21314e-05	5.31719	1	ILMN_1737805	TPCN1	ILMN_3327	53373	29725621	NM_017901.3	NP_060371.2	1070097	S	2559	CTGGGACGGCGATCAAGGACCAAGAGCGACCTGAGCCTGAAGATGTACCA	+	112215474-112215523	0	0	0	TPCN1	two pore segment channel 1	Plasma Membrane	ion channel	-0.600913	0.0599363	1	-0.764444	0.0216367	2
TRAF3IP3	-0.618291	8.21643	-3.27393	0.00371352	0.04666	-2.42065	1	-0.849195	8.21643	-4.4966	0.000209662	0.004072	0.230661	1	ILMN_1780397	TRAF3IP3	ILMN_26492	80342	13435126	NM_025228.1	NP_079504.1	3450154	S	1708	ACCTCAGTGACGAGTATCTCTCCTGCCTGCGTAAGCTGCAGCACTGTCGA	+	208021341-208021390	0	0	0	TRAF3IP3	TRAF3 interacting protein 3	unknown	other	-0.566976	0.19224	d	-1.0446	0.0232402	2
TRIP10	0.619859	8.10994	4.38606	0.00027212	0.00617961	0.125848	1	-0.106115	8.10994	-0.750856	0.461286	0.820992	-6.7794	0	ILMN_2161746	TRIP10	ILMN_23905	9322	42516568	NM_004240.2	NP_004231.1	430431	S	1759	GGAGCCCCAGGACCTATGCACTTTATTTCTGACCCCGTGGCTTCGGCTGA	+	6702277-6702326	0	0	0	TRIP10	thyroid hormone receptor interactor 10	Cytoplasm	other	0.623908	0.0519398	1	-0.0742234	0.853026	X
TSPO	-0.740069	12.8836	-3.61168	0.00169091	0.0257152	-1.66117	1	-1.30841	12.8836	-6.38529	2.81497e-06	0.000116322	4.54356	1	ILMN_1681679	TSPO	ILMN_12726	706	74275349	NM_000714.4	NP_000705.2	6860753	A	761	ACCTGAGCCCCCACCCGGGAGCAGTGTCCTGTGCTTTCTGCATGCTTAGA	+	41889087-41889136	0	0	0	TSPO	translocator protein (18kDa)	Cytoplasm	transmembrane receptor	-0.333481	0.495243	d	-1.61733	0.0035233	2
TUBB6	1.42839	8.52234	5.19506	4.09705e-05	0.00138947	1.99853	1	1.92643	8.52234	7.00643	7.45255e-07	3.93614e-05	5.88006	1	ILMN_1702636	TUBB6	ILMN_26276	84617	14210535	NM_032525.1	NP_115914.1	520255	I	147	AGGCTACGTGGGAGACTCGGCGCTGCAGCTGGAGAGAATCAACGTCTACT	+	12298740-12298789	0	0	0	TUBB6	tubulin, beta 6	Cytoplasm	other	0.700908	0.116632	1	2.12087	0.000659106	2
TUBB6	0.93281	8.62466	4.06259	0.000584357	0.011263	-0.624955	1	1.21055	8.62466	5.2722	3.42867e-05	0.000912852	2.03561	1	ILMN_1699489	TUBB6	ILMN_138016	84617	89047322	XM_940079.1	XP_945172.1	1570092	A	1319	TGGTGTCGGCCCCTCACAAATGCAGCCAAGTCATGTAATTAGTCATCTGG			0	0	0	TUBB6	tubulin, beta 6	Cytoplasm	other	0.700908	0.116632	1	2.12087	0.000659106	2
C10orf125	-0.389418	8.46411	-5.61552	1.56279e-05	0.000647431	2.95608	0	-0.983553	8.46411	-14.1831	4.71476e-12	2.39677e-09	17.7751	1	ILMN_1704785	C10orf125	ILMN_14268	282969	148596950	NM_198472.2	NP_940874.2	2510546	S	391	AAGGCTTTTGCTGTTGTGGCAACGGGATGCTGAAGCAGGGTCTCGGCACC	-	135018975-135018992:135018993-135018999:135019232-135019256	0	0	0	C10orf125	chromosome 10 open reading frame 125	unknown	enzyme	-0.370535	0.114624	X	-1.67599	7.70996e-05	2
TXNRD2	-0.585658	8.78928	-7.43607	3.06264e-07	2.94218e-05	6.86975	1	-0.254585	8.78928	-3.23245	0.00408661	0.0454915	-2.6808	0	ILMN_1657893	TXNRD2	ILMN_38777	10587	87196331	NM_006440.3	NP_006431.2	2230397	A	1876	TGGGTGGAAACCTACCCTGTGGGCACCCATGTCCGAGCCCCCTGGCATTT	-	18243078-18243127	0	0	0	TXNRD2	thioredoxin reductase 2	Cytoplasm	enzyme	-0.319903	0.122656	d	-0.17074	0.438421	X
TYSND1	-1.17993	9.35523	-7.711	1.75638e-07	1.93487e-05	7.42221	1	-1.09575	9.35523	-7.16088	5.3979e-07	3.00717e-05	6.2045	1	ILMN_1775677	TYSND1	ILMN_176427	219743	94400922	NM_001040273.1	NP_001035363.1	1940288	S	2139	AGGGGCGCTCTTGACACTGTGCCTTCATTTTCCAGCCCACAGCCTGGGTC	-	71569035-71569084	0	0	0	TYSND1	trypsin domain containing 1	Cytoplasm	peptidase	-0.437132	0.0973909	d	-0.39947	0.131848	d
C11orf75	-0.315245	9.61229	-2.1843	0.0407335	0.248733	-4.65983	0	0.79706	9.61229	5.52276	1.93011e-05	0.000569144	2.61089	1	ILMN_1798270	C11orf75	ILMN_9654	56935	9910225	NM_020179.1	NP_064564.1	4900747	S	736	AGTAGCTCCACCTGAAGAGGGATGGAACCTCTGGGTCAGGAAACAGCTGG	-	92851448-92851497	0	0	0	C11orf75	chromosome 11 open reading frame 75	unknown	other	-0.365993	0.245988	X	0.822144	0.0155992	2
C12orf4	-0.176286	8.60825	-2.10968	0.0473859	0.273672	-4.79526	0	-0.66488	8.60825	-7.95686	1.07747e-07	8.01567e-06	7.82477	1	ILMN_1751898	C12orf4	ILMN_9236	57102	22095357	NM_020374.2	NP_065107.1	6420551	S	3289	GTTGAATGCTGCTGCCCAACTCTTCCTTTGTCACCTCTAGGCTATTCCAC	-	4467642-4467691	0	0	0	C12orf4	chromosome 12 open reading frame 4	unknown	other	-0.432182	0.054058	X	-0.759935	0.00377655	2
C12orf52	0.303313	8.77814	2.1653	0.0423422	0.255362	-4.69461	0	0.890537	8.77814	6.35738	2.99173e-06	0.000122588	4.48235	1	ILMN_1667857	C12orf52	ILMN_22595	84934	14249569	NM_032848.1	NP_116237.1	4900753	S	1504	CTCTCCAGCCCTGTCTCAACCATACTCCAAATTAGTGCCAACCCAGGGGC	+	112114231-112114280	0	0	0	C12orf52	chromosome 12 open reading frame 52	Cytoplasm	other	0.250042	0.356449	X	1.10592	0.0013338	2
UBE2L6	-0.883551	11.3231	-3.63088	0.00161642	0.0248751	-1.61745	1	-0.834787	11.3231	-3.43049	0.0025825	0.031698	-2.23709	1	ILMN_1769520	UBE2L6	ILMN_7531	9246	38157980	NM_004223.3	NP_004214.1	2070170	A	1184	CCTCCAGCATTCAGTCCAGGGGGAGCCACGGAAACCATGTTCTTGCTTAA	-	57075731-57075780	0	0	0	UBE2L6	ubiquitin-conjugating enzyme E2L 6	Cytoplasm	enzyme	-0.892441	0.0558342	1	-0.89949	0.0536729	1
C16orf57	0.134583	9.47116	0.950901	0.35275	0.741359	-6.4241	0	1.06669	9.47116	7.53676	2.49544e-07	1.60663e-05	6.98049	1	ILMN_1765880	C16orf57	ILMN_11644	79650	42716282	NM_024598.2	NP_078874.2	2750360	S	2061	AGGCATTCTGAGGGGCAACGTGGAGGAAGGGCCAGGGATGCATGGGATTT	+	56612830-56612879	0	0	0	C16orf57	chromosome 16 open reading frame 57	unknown	other	0.118103	0.560436	X	0.949744	0.000458097	2
C16orf58	-0.476482	10.4432	-2.87814	0.00915387	0.0910017	-3.28015	0	-0.709625	10.4432	-4.28641	0.000344314	0.00612808	-0.260904	1	ILMN_1685289	C16orf58	ILMN_23463	64755	12232402	NM_022744.1	NP_073581.1	6940647	S	2695	GGCTTTAATCACCAACCCATCAACATCAAGCCTCCCCCAGGCCGGTTCAA	-	31408331-31408380	0	0	0	C16orf58	chromosome 16 open reading frame 58	unknown	other	-0.0635611	0.736369	X	-0.200698	0.216752	d
C16orf7	0.515059	8.81716	5.20369	4.01615e-05	0.00136949	2.01833	0	1.59735	8.81716	16.1382	4.12963e-13	3.59882e-10	20.1147	1	ILMN_1693630	C16orf7	ILMN_693	9605	108860689	NM_004913.2	NP_004904.2	4760433	S	2615	CTCACCTTGGCTGTGGGCTGTGAACATTCCGGGACCCTGGGCATCTTATC	-	88301126-88301175	0	0	0	C16orf7	chromosome 16 open reading frame 7	unknown	transporter	0.849565	0.00215367	X	1.62529	4.50115e-05	2
C17orf49	0.0591846	10.4706	0.41822	0.680142	0.911245	-6.79285	0	0.887065	10.4706	6.26833	3.63561e-06	0.00014378	4.28643	1	ILMN_1763688	C17orf49	ILMN_6984	124944	52856420	NM_174893.1	NP_777553.1	2570035	S	620	TCCTGCTGAGCCTTCCACCTCTGACCTCTCACTGTTCATGCCGGACCTGT	+	6861356-6861405	0	0	0	C17orf49	chromosome 17 open reading frame 49	Nucleus	other	0.0257917	0.900988	X	0.8166	0.000463298	2
UNC93B1	-0.835664	10.6753	-4.21054	0.000411922	0.0086019	-0.281914	1	-0.719282	10.6753	-3.62414	0.0016422	0.021861	-1.79665	1	ILMN_2193591	UNC93B1	ILMN_179886	81622	45580708	NM_030930.2	NP_112192.2	4780612	S	2155	ACGGTCAGGGTCTTCTTGCGACCCGGCCCGCTCCAGATCCCCACAGCTCT	-	67515261-67515310	0	0	0	UNC93B1	unc-93 homolog B1 (C. elegans)	Cytoplasm	other	-0.215128	0.667192	d	-0.222676	0.660134	d
UNKL	0.88525	8.71999	6.74479	1.2964e-06	9.47112e-05	5.43418	1	0.087498	8.71999	0.666654	0.512439	0.847232	-6.84004	0	ILMN_1692826	UNKL	ILMN_23459	64718	149408114	NM_023076.3	NP_075564.3	7570671	S	1883	TCTGTGCGCCTGCGCCTCGGAGAGCAAGTGAAGGAGCATCATGGGTTTTG	-	1355395-1355444	0	0	0	UNKL	unkempt homolog (Drosophila)-like	unknown	other	0.107932	0.506613	d	0.062065	0.732121	X
VARS	-0.786067	8.85036	-5.78098	1.07485e-05	0.000481238	3.32839	1	-0.46473	8.85036	-3.41777	0.00266015	0.0324877	-2.26582	0	ILMN_1696601	VARS	ILMN_10395	7407	94538367	NM_006295.2	NP_006286.1	6980100	I	4148	AGCTCCAACAGACAGAAGCAGAGCTCAGGAAGGTGGATGAGGCCATCGCC	-	31853370-31853418:31854723-31854723	0	0	0	VARS	valyl-tRNA synthetase	Cytoplasm	enzyme	-0.123446	0.46465	d	-0.164069	0.321614	X
C17orf59	0.429159	7.94807	3.29012	0.0035771	0.045284	-2.3847	0	0.622997	7.94807	4.77617	0.000108669	0.00236754	0.884058	1	ILMN_2225746	C17orf59	ILMN_4989	54785	8923020	NM_017622.1	NP_060092.1	6400114	S	1461	AAACACCCCGCAGGCAAAGATGCACCCCTGCTGATGGAGAGCCTTCTGCT	-	8032605-8032654	0	0	0	C17orf59	chromosome 17 open reading frame 59	unknown	other	0.472708	0.0339106	X	0.80753	0.00224391	2
C19orf10	-0.454695	10.727	-4.25547	0.000370427	0.00788726	-0.177588	0	-0.793332	10.727	-7.42477	3.13413e-07	1.92634e-05	6.75131	1	ILMN_1787844	C19orf10	ILMN_14819	56005	54112408	NM_019107.3	NP_061980.1	1030458	S	697	AAGTTTTCTACCTGGGCTGACGTTGCCTTGTCCGGAGGGGCTTGCAGGGT	-	4608861-4608910	0	0	0	C19orf10	chromosome 19 open reading frame 10	Extracellular Space	cytokine	-0.304906	0.173153	X	-0.602545	0.0137785	2
C19orf59	0.266759	7.35829	0.751378	0.460979	0.813272	-6.59422	0	1.19862	7.35829	3.37615	0.00293045	0.0350262	-2.35959	1	ILMN_1762713	C19orf59	ILMN_181903	199675	109698610	NM_174918.2	NP_777578.2	1070367	S	1123	CTCCGTACATGTGGGTGTCGCCATGTGTGCCCTGTCACTATCTGTGGCTG	+	7650534-7650583	0	0	0	C19orf59	chromosome 19 open reading frame 59	unknown	other	0.176609	0.878787	X	1.91209	0.042099	2
VCL	-0.600463	9.9775	-3.31993	0.00333866	0.0427984	-2.3184	1	-0.152409	9.9775	-0.842659	0.409159	0.792466	-6.70554	0	ILMN_1795429	VCL	ILMN_27566	7414	50593530	NM_014000.2	NP_054706.1	70592	A	5248	CCCGGTTCTTCCAGTGGTTTGAGACACTGGTTTACACTTTATGCCGGATG	+	75549682-75549731	0	0	0	VCL	vinculin	Plasma Membrane	enzyme	-0.379187	0.0984882	d	-0.239152	0.310916	X
WASF2	-0.693262	9.77886	-3.68012	0.00143995	0.0228083	-1.50517	1	-0.676755	9.77886	-3.5925	0.00176867	0.0232215	-1.869	1	ILMN_1684051	WASF2	ILMN_175827	10163	45007036	NM_006990.2	NP_008921.1	4120215	S	3827	GGTTTGGGCCTAATGGCTTTGACTAAATTACCCCCATCCTCCTTGCCCGG	-	27605106-27605155	0	0	0	WASF2	WAS protein family, member 2	Cytoplasm	other	-0.182521	0.22639	d	-0.132161	0.404572	d
WDR45L	0.625648	9.61284	3.71787	0.00131768	0.0212651	-1.4189	1	-0.193358	9.61284	-1.14902	0.2638	0.670904	-6.40292	0	ILMN_1685763	WDR45L	ILMN_10751	56270	19923554	NM_019613.2	NP_062559.1	2600646	S	1780	GCCTGTGGTCTTCTCCGTACCCGCAACGTGGTCATCTGTGCCCGTGACGT	-	78166351-78166400	0	0	0	WDR45L	WDR45-like	unknown	other	0.385625	0.0955483	d	-0.314858	0.17534	X
WDR75	-0.650638	9.50022	-5.51885	1.94741e-05	0.000773293	2.73731	1	-0.590619	9.50022	-5.00976	6.29749e-05	0.00149911	1.42804	1	ILMN_1801869	WDR75	ILMN_14393	84128	29789282	NM_032168.1	NP_115544.1	6620670	S	2526	AGACTACAGCTGGATAGCTGCCCTTTAAGCCTTGGAGATGGGGAGGATCC	+	190048361-190048388:190048389-190048410	0	0	0	WDR75	WD repeat domain 75	Nucleus	other	-0.560769	0.163566	d	-0.914255	0.0298972	2
WFS1	1.37721	8.71242	6.247	3.80992e-06	0.000219259	4.36079	1	2.07399	8.71242	9.40759	7.0815e-09	8.8841e-07	10.555	1	ILMN_1759023	WFS1	ILMN_18545	7466	13376995	NM_006005.2	NP_005996.1	6590224	S	3536	GGAGGTCCCTGCCAGTGTTTAGAAGAGCCTGACTGTGTTCAGTGCCTTGG	+	6355789-6355838	0	0	0	WFS1	Wolfram syndrome 1 (wolframin)	Cytoplasm	enzyme	0.807246	0.0559358	1	2.32401	0.00026	2
C1QA	0.523743	10.6637	2.33143	0.0300484	0.204152	-4.38451	0	-0.99002	10.6637	-4.40705	0.000258965	0.00484772	0.021192	1	ILMN_1737918	C1QA	ILMN_138176	712	7705752	NM_015991.1	NP_057075.1	2940685	S	589	ACCAACAAGGGGCTCTTCCAGGTGGTGTCAGGGGGCATGGTGCTTCAGCT	+	22838328-22838377	0	0	0	C1QA	complement component 1, q subcomponent, A chain	Extracellular Space	other	0.0371958	0.930041	X	-0.953858	0.00840115	2
C1QB	-0.609509	11.5474	-1.65798	0.112572	0.445377	-5.5454	0	-2.41814	11.5474	-6.57779	1.85465e-06	8.31901e-05	4.96307	1	ILMN_1796409	C1QB	ILMN_36274	713	87298827	NM_000491.3	NP_000482.3	5910019	S	805	CAGGCCACCGACAAGAACTCACTACTGGGCATGGAGGGTGCCAACAGCAT	+	22860377-22860426	0	0	0	C1QB	complement component 1, q subcomponent, B chain	Extracellular Space	other	-0.809124	0.273952	X	-2.46837	0.00442169	2
WTAP	0.880061	7.76974	4.1207	0.000509371	0.0101545	-0.490329	1	0.416397	7.76974	1.94969	0.0650477	0.329506	-5.25458	0	ILMN_2260725	WTAP	ILMN_18153	9589	23199973	NM_152857.1	NP_690596.1	1850100	I	57	CAAGCAGCGCGGCCTCGGCCTATGCGACCGGTGGCGCCGGCGCGGCTTCT	+	160068666-160068715	0	0	0	WTAP	Wilms tumor 1 associated protein	Nucleus	other	0.365635	0.343958	d	1.08176	0.0101015	X
C1QC	-0.384696	13.1567	-1.59154	0.126816	0.473807	-5.64451	0	-0.770604	13.1567	-3.18811	0.00452576	0.0492353	-2.77905	1	ILMN_1785902	C1QC	ILMN_18780	714	56786154	NM_172369.2	NP_758957.2	1440341	S	753	ATGGTGGGCATCCAGGGCTCTGACAGCGTCTTCTCCGGCTTCCTGCTCTT	+	22846804-22846853	0	0	0	C1QC	complement component 1, q subcomponent, C chain	Extracellular Space	other	-0.264212	0.581512	X	-0.828325	0.0627614	1
WTAP	1.32964	8.43457	3.32025	0.00333617	0.0427854	-2.31768	1	0.931835	8.43457	2.32688	0.0303357	0.200968	-4.56986	0	ILMN_1734544	WTAP	ILMN_24202	9589	23199972	NM_004906.3	NP_004897.2	6560403	I	1336	GGTAATCGAACTGTGGGTTCCCGCCACGTTCAGAATGGCTTGGACTCAAG	+	160096556-160096605	0	0	0	WTAP	Wilms tumor 1 associated protein	Nucleus	other	0.365635	0.343958	d	1.08176	0.0101015	X
WTAP	0.607821	7.36511	5.20273	4.02501e-05	0.0013698	2.01614	1	0.180718	7.36511	1.54688	0.137216	0.496544	-5.89109	0	ILMN_1657618	WTAP	ILMN_18153	9589	23199973	NM_152857.1	NP_690596.1	6840440	S	25	GCGCGGTGGCCCGGGGGGCCCGGGCGGCAGGGCAAGCAGCGCGGCCTCGG	+	160068634-160068683	0	0	0	WTAP	Wilms tumor 1 associated protein	Nucleus	other	0.365635	0.343958	d	1.08176	0.0101015	X
C1RL	0.00369769	7.44803	0.0327497	0.974191	0.994205	-6.88269	0	1.25871	7.44803	11.1482	3.78013e-10	8.34742e-08	13.4738	1	ILMN_1733288	C1RL	ILMN_13968	51279	7706082	NM_016546.1	NP_057630.1	5810424	S	2987	TCCCAAAAGGCAGGTGCAATGATGCACACTTATACCCCCAGCCACTCAGG	-	7138573-7138622	0	0	0	C1RL	complement component 1, r subcomponent-like	Extracellular Space	peptidase	0.441431	0.391505	X	3.0497	0.000171171	2
XAF1	-0.82581	8.04578	-4.36165	0.000288257	0.00646188	0.0691253	1	-0.260768	8.04578	-1.37729	0.1833	0.570537	-6.12465	0	ILMN_2370573	XAF1	ILMN_11175	54739	40288192	NM_199139.1	NP_954590.1	7610440	A	2788	CTCCGTCTCCGCTAAAAATACGAAAATTAGCCAGGCGTGGTGGCGAGCAC	+	6618909-6618958	0	0	0	XAF1	XIAP associated factor 1	Nucleus	other	-1.59841	0.0777123	1	-0.741202	0.436623	X
CES1	1.44925	8.31892	5.80185	1.02552e-05	0.000464263	3.37513	1	1.1538	8.31892	4.61906	0.000157144	0.00320876	0.517057	1	ILMN_2359945	CES1	ILMN_165652	1066	68508966	NM_001025195.1	NP_001020366.1	2680056	A	1796	CAGAACACATAGAGCTGTGAATGAAGATCCAGCCGGCCTTGGGAGCCTGG	-	54394431-54394461:54394462-54394480	0	0	0	CES1	carboxylesterase 1	Cytoplasm	enzyme	-	-	-	-	-	-
CFB	1.15605	8.89317	5.15394	4.50599e-05	0.00149593	1.90413	1	0.385816	8.89317	1.72005	0.100511	0.42191	-5.6308	0	ILMN_1774287	CFB	ILMN_164971	629	67782357	NM_001710.4	NP_001701.2	3370349	S	2286	GTCCCTATGCTGACCCCAATACTTGCAGAGGTGATTCTGGCGGCCCCTTG	+	32027200-32027229:32027311-32027330	0	0	0	CFB	complement factor B	Extracellular Space	peptidase	-	-	-	-	-	-
ZDHHC8	-0.769543	11.45	-3.94805	0.00076593	0.0139474	-0.889777	1	-0.139682	11.45	-0.716622	0.481706	0.833233	-6.80488	0	ILMN_1789492	ZDHHC8	ILMN_29624	29801	57863251	NM_013373.2	NP_037505.1	4590154	S	3348	CAGGGACCTGAGAGTAAGCACATGACAGCGTCTGCTTGCGTTGTGTCTGT	+	18513867-18513916	0	0	0	ZDHHC8	zinc finger, DHHC-type containing 8	Cytoplasm	other	-0.436534	0.137566	d	-0.307417	0.310663	X
C20orf194	-0.313406	8.73334	-2.7435	0.0123564	0.112599	-3.56242	0	-0.675286	8.73334	-5.91134	8.02104e-06	0.000276248	3.49161	1	ILMN_1689585	C20orf194	ILMN_308676	25943	149363694	NM_001009984.1	NP_001009984.1	5130167	I	6291	CTGAAGCCTGGACACTGGGCCCTTCAGGTCGCAAGAAAAAGTTCCCTCCT	-	3178462-3178511	0	0	0	C20orf194	chromosome 20 open reading frame 194	Nucleus	other	-0.493725	0.036511	X	-0.92759	0.00146085	2
ZFAND6	0.657815	8.70485	4.64238	0.000148761	0.00380005	0.72151	1	0.592196	8.70485	4.17929	0.000443495	0.00754391	-0.511119	1	ILMN_1778803	ZFAND6	ILMN_16822	54469	21359917	NM_019006.2	NP_061879.2	5860730	S	455	AAGCCCACCTGCAACCTCTGTCAGTAGTCTGTCTGAATCTTTACCAGTTC	+	78199885-78199895:78201109-78201147	0	0	0	ZFAND6	zinc finger, AN1-type domain 6	unknown	other	0.420341	0.150927	d	0.666175	0.0296751	2
ZMYND15	0.604581	10.1828	3.25545	0.00387545	0.0481968	-2.46161	1	1.72932	10.1828	9.31179	8.40672e-09	1.01428e-06	10.3834	1	ILMN_1778136	ZMYND15	ILMN_27083	84225	14149998	NM_032265.1	NP_115641.1	6580717	S	2139	CCGGCGGAAATGAATGCTGATACCCTAGTAGTCCCCAGCTCCCAAACACT	+	4596022-4596034:4596035-4596071	0	0	0	ZMYND15	zinc finger, MYND-type containing 15	unknown	other	0.661859	0.110327	1	1.68821	0.0015463	2
ZNF395	0.744263	9.47915	5.3755	2.70347e-05	0.0010056	2.41133	1	-1.30075	9.47915	-9.3948	7.24509e-09	8.99681e-07	10.5321	1	ILMN_1772876	ZNF395	ILMN_162666	55893	46249380	NM_018660.2	NP_061130.1	1980403	S	4314	ATTTAGTGCCCAGGGAGTCCAGCGAATGACGTCTGTGGCCAAGCGAGGTC	-	28259459-28259508	0	0	0	ZNF395	zinc finger protein 395	Cytoplasm	other	0.490277	0.146403	d	-0.820999	0.0221665	2
ZNF573	-0.716324	8.66458	-7.51621	2.60166e-07	2.61721e-05	7.03188	1	-0.550201	8.66458	-5.77312	1.09405e-05	0.000355364	3.18009	0	ILMN_1658080	ZNF573	ILMN_23003	126231	40789269	NM_152360.2	NP_689573.2	6400711	S	2312	GAGCGCGCCATTCATCATCAGACAGCCCACACTGGTGAGAAATGATGGAA	-	42921167-42921216	0	0	0	ZNF573	zinc finger protein 573	Nucleus	other	-0.344721	0.0966339	d	-0.640504	0.00677547	X
CHKB	0.345238	10.7044	2.67926	0.0142364	0.12451	-3.69495	0	0.606176	10.7044	4.7043	0.000128621	0.00272202	0.716258	1	ILMN_2331205	CHKB	ILMN_1067	1120	23238259	NM_005198.3	NP_005189.2	3400450	A	1294	CTTGGACTATGCCCAGTCTCGGTTCCAGTTCTACTTCCAGCAGAAGGGGC	-	49364504-49364550:49364721-49364723	0	0	0	CHKB	choline kinase beta	unknown	kinase	-	-	-	-	-	-
CHKB	0.365931	9.34759	2.25964	0.0348907	0.224655	-4.52019	0	0.625056	9.34759	3.85976	0.000943349	0.0139332	-1.25421	1	ILMN_1659054	CHKB	ILMN_1067	1120	23238259	NM_005198.3	NP_005189.2	4920025	A	896	TTCTGCCACAATGACATCCAGGAAGGGAACATCTTGCTGCTCTCAGAGCC	-	49365541-49365566:49365653-49365676	0	0	0	CHKB	choline kinase beta	unknown	kinase	-	-	-	-	-	-
CHMP1B	0.677104	10.4818	7.79569	1.48294e-07	1.70685e-05	7.59024	1	0.375112	10.4818	4.31877	0.000318976	0.00575052	-0.185259	0	ILMN_1763265	CHMP1B	ILMN_27331	57132	42734391	NM_020412.3	NP_065145.2	3940148	S	781	GCCAGAATGCTGAAATGCCCTTCTACCTTTGGGTTTACAGCCCCCTCCAC	+	11842206-11842255	0	0	0	CHMP1B	charged multivesicular body protein 1B	Plasma Membrane	enzyme	-	-	-	-	-	-
ZNF593	-0.606779	8.46921	-4.82012	9.80418e-05	0.00272784	1.13376	1	-0.0586785	8.46921	-0.466129	0.646046	0.902986	-6.95643	0	ILMN_1703441	ZNF593	ILMN_20499	51042	141802010	NM_015871.3	NP_056955.1	5810201	S	499	ATGGACAGTGACGCAAGGACTAGGCTGGGAGGGAGCGTGCCAACCCCTTT			0	0	0	ZNF593	zinc finger protein 593	Nucleus	transcription regulator	-0.55421	0.0965119	d	-0.368782	0.279038	X
C5orf30	0.552664	7.45701	5.69969	1.29134e-05	0.000556715	3.14584	0	0.645882	7.45701	6.66106	1.55065e-06	7.21398e-05	5.14311	1	ILMN_1677292	C5orf30	ILMN_28409	90355	34147457	NM_033211.2	NP_149988.1	3120037	S	2924	AGGAAACACAACTGGTTACCTATGAGACCTGTTCTGTCCGTGTGCCTACG	+	102642174-102642223	0	0	0	C5orf30	chromosome 5 open reading frame 30	unknown	other	1.71192	0.00253294	X	2.35115	0.000326628	2
C5orf4	-0.225433	7.69865	-1.85594	0.0779208	0.365152	-5.23227	0	-1.14936	7.69865	-9.4624	6.42273e-09	8.18387e-07	10.6526	1	ILMN_1728742	C5orf4	ILMN_16262	10826	146198574	NM_032385.3	NP_115761.2	1690240	A	2575	CTCCCTAGGAGGCTTTTGCCCTCAGCTTGAATACAGTTCCTGGTGCATCA	-	154178617-154178666	0	0	0	C5orf4	chromosome 5 open reading frame 4	unknown	other	-0.0777636	0.70327	X	-0.362065	0.0458077	2
ZSWIM4	0.612224	10.3161	4.05807	0.00059063	0.0113504	-0.635416	1	2.0671	10.3161	13.7016	8.96343e-12	3.83714e-09	17.1512	1	ILMN_2150654	ZSWIM4	ILMN_167043	65249	65301125	NM_023072.1	NP_075560.1	1170072	S	4287	GAGACTGGGGTGCATCTCCAGAGCCACTCACACCCTCAACCTCGTTTCCT	+	13803992-13804041	0	0	0	ZSWIM4	zinc finger, SWIM-type containing 4	unknown	other	0.438839	0.0503734	d	0.394483	0.074257	d
C6orf211	0.336276	8.29074	2.99715	0.00699911	0.0750539	-3.02599	0	0.98492	8.29074	8.77837	2.23103e-08	2.23112e-06	9.40566	1	ILMN_1798108	C6orf211	ILMN_941	79624	13375745	NM_024573.1	NP_078849.1	2750129	S	1628	CACCTTTTCATCCCCAGAAAAGGAGCACGTGAATTGAGTCGCCTGGCGGC	+	151831981-151832030	0	0	0	C6orf211	chromosome 6 open reading frame 211	unknown	other	0.342335	0.182815	X	1.71943	0.000108504	2
C6orf48	-0.381314	11.5234	-2.87534	0.00921147	0.0914253	-3.28607	0	-0.811165	11.5234	-6.11667	5.0787e-06	0.000187816	3.95055	1	ILMN_2391765	C6orf48	ILMN_163175	50854	94681054	NM_001040437.1	NP_001035527.1	7150017	A	551	GTGATTCCTGCAACTTGACCTTCAGGCTGGGAGAGGTGGAGAGCCATGCC	+	31913122-31913171	0	0	0	C6orf48	chromosome 6 open reading frame 48	unknown	other	-0.316773	0.154612	X	-0.800724	0.00313658	2
C7orf23	-0.423425	9.46538	-3.60608	0.00171326	0.0258936	-1.67391	0	-0.907327	9.46538	-7.72719	1.70032e-07	1.17868e-05	7.36623	1	ILMN_1751143	C7orf23	ILMN_6840	79161	34147374	NM_024315.2	NP_077291.1	4290575	S	536	TGCAAACCTGTACTTCCATGATGTGGGAAGGTGAGGCTGCCAAGGAGAAG	-	86663871-86663887:86663888-86663920	0	0	0	C7orf23	chromosome 7 open reading frame 23	unknown	other	-0.913559	0.00264595	X	-1.23313	0.000378352	2
CICE	0.68921	9.28806	4.29302	0.00033898	0.00734587	-0.0903621	1	0.339499	9.28806	2.1147	0.0469088	0.268703	-4.96448	0	ILMN_1790471	CICE	ILMN_139045	152302	88961411	XR_000206.4		240437	A	15	CGTGTCCATCCTGCTGGAGAGCGACAAGAAGCTCACCCAGGAACAAGGGA	-	10040427-10040431:10042736-10042780	0	0	0					-	-	-	-	-	-
C7orf41	-0.0421267	9.09181	-0.284293	0.779043	0.943926	-6.84138	0	-0.655268	9.09181	-4.42208	0.00024994	0.00471496	0.0563528	1	ILMN_1672605	C7orf41	ILMN_5639	222166	116008439	NM_152793.2	NP_690006.2	1740458	S	5738	CCTCCCCTGAGAGTGAGGACCTCATCCGACCATGTAATTACCATTCGCTT	+	30168830-30168879	0	0	0	C7orf41	chromosome 7 open reading frame 41	unknown	other	-0.128913	0.575683	X	-0.398041	0.0627881	d
ZYX	-0.902794	11.5715	-3.78318	0.00112994	0.0188331	-1.26927	1	-0.729408	11.5715	-3.0566	0.00611473	0.0621689	-3.06768	0	ILMN_1701875	ZYX	ILMN_2137	7791	58530843	NM_003461.4	NP_003452.1	7320594	A	2218	TGGGAGACCCTCCAGGACATTCCCACCCTCCCCCATGCTGCCAAGTTGTA	+	142798238-142798287	0	0	0	ZYX	zyxin	Plasma Membrane	other	-0.496669	0.077785	d	-0.733939	0.0152551	X
C7orf44	0.0957657	9.50352	0.622433	0.540531	0.853772	-6.68406	0	-0.597682	9.50352	-3.88466	0.000889539	0.0133204	-1.19656	1	ILMN_2081335	C7orf44	ILMN_41287	55744	90855770	NM_018224.2	NP_060694.2	5090687	S	620	GTGACAGACACTCCTGCAACCCAGTTTTCCAGCCACCAGTGGGATGATGG	-	43645571-43645620	0	0	0	C7orf44	chromosome 7 open reading frame 44	unknown	other	0.109283	0.806461	X	-0.421309	0.263586	d
C7orf59	-0.394307	10.3443	-3.57764	0.0018313	0.0272036	-1.73851	0	-0.953622	10.3443	-8.65246	2.82387e-08	2.70217e-06	9.16933	1	ILMN_1779735	C7orf59	ILMN_17527	389541	148806921	NM_001008395.2	NP_001008396.1	4590615	S	321	TGTGGTGAAGAGGCAGAACCGAGGTCGGGAGCCCATTGATGTCTGAGCCT	+	99589478-99589523:99589524-99589527	0	0	0	C7orf59	chromosome 7 open reading frame 59	unknown	other	-0.373997	0.0318784	X	-0.52807	0.00564364	2
CKAP4	0.820871	9.61348	3.90393	0.000849991	0.0151447	-0.991539	1	0.542456	9.61348	2.57983	0.0176887	0.137854	-4.07171	0	ILMN_1790891	CKAP4	ILMN_182487	10970	19920316	NM_006825.2	NP_006816.2	4490528	S	2458	CTGCCTCCCTCATGGTGTGCGTGTCGTTCTCTTCCTGACGCATCTGTGAT	-	105156317-105156366	0	0	0	CKAP4	cytoskeleton-associated protein 4	Cytoplasm	other	-	-	-	-	-	-
ANKMY1	-0.692463	8.66761	-5.09143	5.20878e-05	0.00167788	1.76036	1	-0.330935	8.66761	-2.43325	0.0242382	0.172556	-4.36379	0	ILMN_1675483	ANKMY1	ILMN_24563	51281	75750530	NM_017844.2	NP_060314.2	2760102	A	2383	CTGCACCTTTGGGGTCATGCTTTGTAGCAGTGTCTCCCTTGCGACCTCGC	-	241067545-241067594	0	0	0	ANKMY1	ankyrin repeat and MYND domain containing 1	unknown	other	0.082372	0.666187	0	0.00879189	0.970259	X
CA12	0.54375	7.28141	4.7317	0.000120614	0.00321826	0.928807	0	0.786513	7.28141	6.84421	1.04933e-06	5.22013e-05	5.53587	1	ILMN_1720998	CA12	ILMN_796	771	45935381	NM_001218.3	NP_001209.1	150474	A	3837	AGCACCCCTCAGTTCCTGTGCCTCAGCCCACAGGCCACTGTGATAATGGT	-	61402871-61402920	0	0	0	CA12	carbonic anhydrase XII	Plasma Membrane	enzyme	0.616346	0.0238778	X	0.788172	0.00658363	2
CA2	0.401731	9.88026	2.0354	0.0549666	0.298784	-4.92706	0	1.41297	9.88026	7.1589	5.42019e-07	3.00929e-05	6.20035	1	ILMN_1662795	CA2	ILMN_28750	760	4557394	NM_000067.1	NP_000058.1	460358	S	1004	GACTAGACCAATTGTCATGCTTGACACAACTGCTGTGGCTGGTTGGTGCT	+	86580426-86580475	0	0	0	CA2	carbonic anhydrase II	Cytoplasm	enzyme	0.553897	0.0211214	X	1.41378	0.000136449	2
CA2	0.392678	8.77879	3.45146	0.00245938	0.0339718	-2.02381	0	1.16771	8.77879	10.2636	1.60545e-09	2.67404e-07	12.0366	1	ILMN_2199439	CA2	ILMN_28750	760	4557394	NM_000067.1	NP_000058.1	2060674	S	1111	AGTACCTTGACTTTGTTCACAGCATGTAGGGTGATGAGCACTCACAATTG	+	86580533-86580582	0	0	0	CA2	carbonic anhydrase II	Cytoplasm	enzyme	0.553897	0.0211214	X	1.41378	0.000136449	2
CAB39	-0.138165	11.8173	-1.1344	0.269742	0.669343	-6.23569	0	0.809255	11.8173	6.64433	1.60733e-06	7.44929e-05	5.107	1	ILMN_1765858	CAB39	ILMN_12854	51719	19745179	NM_016289.2	NP_057373.1	7000017	S	3306	GCAGTGAGGTCGTAGCCTTTTAGGTGGAAGAAGTGAGGGTGCAGCGTGTC	+	231393619-231393668	0	0	0	CAB39	calcium binding protein 39	Cytoplasm	enzyme	-0.0594105	0.799575	X	0.735468	0.00234517	2
DNAJB12	-0.645239	9.15739	-4.53912	0.000189677	0.00462368	0.481623	1	-0.0134551	9.15739	-0.0946541	0.92551	0.98377	-7.0643	0	ILMN_1712929	DNAJB12	ILMN_22806	54788	50593536	NM_001002762.1	NP_001002762.1	3780326	I	2461	TACTTGTGTGGCATAAGCTAGAGGAGCCGGTGCCGCCTGAATGCCGAGCT	-	73764405-73764454	0	0	0	DNAJB12	DnaJ (Hsp40) homolog, subfamily B, member 12	Cytoplasm	other	0.0831899	0.729796	0	0.538289	0.0154485	X
CLDN7	0.252652	7.84031	2.31275	0.031245	0.209444	-4.42006	0	2.44176	7.84031	22.3516	7.44317e-16	2.79417e-12	25.9381	1	ILMN_2143685	CLDN7	ILMN_13755	1366	34222214	NM_001307.3	NP_001298.2	5080373	S	1004	CTGGGTACCGTGCACCCCGCTCTTACCCTAAGTCCAACTCTTCCAAGGAG	-	7104426-7104475	0	0	0	CLDN7	claudin 7	Plasma Membrane	other	-	-	-	-	-	-
CACNA2D3	0.117583	8.02095	0.705407	0.488509	0.826551	-6.62809	0	-0.793734	8.02095	-4.76179	0.000112396	0.0024346	0.850481	1	ILMN_1754076	CACNA2D3	ILMN_181267	55799	54112396	NM_018398.2	NP_060868.2	4220592	S	3562	CACCCTTCATCAGAAATGGGACCGCAAGTGGTAGGCAGTGTCCCTTCTGC	+	55083511-55083560	0	0	0	CACNA2D3	calcium channel, voltage-dependent, alpha 2/delta subunit 3	Plasma Membrane	ion channel	0.20942	0.706351	X	-1.25959	0.0156087	2
ING5	0.710118	7.28447	8.33021	5.20992e-08	7.37763e-06	8.62751	1	0.275693	7.28447	3.23408	0.00407125	0.0453826	-2.67717	0	ILMN_2292748	ING5	ILMN_162397	84289	38201673	NM_032329.4	NP_115705.2	3060497	I	2	CCCCGAGCGCGGCCGCGGACGAAGATGGCGACCGCCATGTACTTGGAGCA	+	242290130-242290153:242290154-242290179	0	0	0	ING5	inhibitor of growth family, member 5	Nucleus	other	-0.0730911	0.70823	0	-0.102799	0.586832	X
CAD	-0.498596	7.91709	-3.4961	0.00221609	0.0313477	-1.92315	0	-0.591996	7.91709	-4.15101	0.000474154	0.00797357	-0.577116	1	ILMN_1810992	CAD	ILMN_1793	790	47458828	NM_004341.3	NP_004332.2	3360402	S	6725	TCAACGAGATAAGCGTGGAAGTGGACTCGGATCCCCGCGCAGCCTACTTC	+	27319652-27319664:27319788-27319824	1	0	0	CAD	carbamoyl-phosphate synthetase 2, aspartate transcarbamylase, and dihydroorotase	Cytoplasm	enzyme	-1.18848	0.0146173	X	-0.559124	0.205893	d
CALD1	0.04294	7.18293	0.354252	0.726774	0.927721	-6.81831	0	0.814295	7.18293	6.71788	1.37307e-06	6.50568e-05	5.26542	1	ILMN_1730487	CALD1	ILMN_3666	800	44890236	NM_033140.2	NP_149131.1	620750	A	3660	GTGTCCCAGGTAGCATTGACTCCCGTCATTGGAGTGAAATGGATCAAAGT	+	134305484-134305533	0	0	0	CALD1	caldesmon 1	Cytoplasm	other	0.334866	0.382644	X	0.575933	0.124077	d
PRKCQ	0.883246	8.39946	4.61118	0.000160085	0.00403536	0.649053	1	0.406834	8.39946	2.12396	0.0460411	0.265308	-4.94775	0	ILMN_1733421	PRKCQ	ILMN_22905	5588	48255887	NM_006257.2	NP_006248.1	3190193	S	2919	CCATCCACCCATTCTCAGCAGACTCCAGTATTGGCACAGTCACTCACTGC	-	6509402-6509451	0	0	0	PRKCQ	protein kinase C, theta	Cytoplasm	kinase	-0.379626	0.313673	0	-0.194776	0.647939	X
SEC61A1	-0.602335	11.8922	-3.65728	0.0015193	0.023696	-1.55729	1	-0.1041	11.8922	-0.632077	0.534335	0.856318	-6.86295	0	ILMN_1659564	SEC61A1	ILMN_9397	29927	60218911	NM_013336.3	NP_037468.1	1030471	S	3537	GCTGACCCCAGCTTCCAGGGGACTGTCACTGTGGACGCCAAAATGGCATA	+	129273117-129273166	0	0	0	SEC61A1	Sec61 alpha 1 subunit (S. cerevisiae)	Cytoplasm	transporter	0.310243	0.22826	0	0.64592	0.0188734	X
AKR1C4	2.73395	7.92457	13.2636	1.63422e-11	1.47691e-08	16.4773	1	0.473828	7.92457	2.29875	0.0321707	0.20911	-4.62348	0	ILMN_1687757	AKR1C4	ILMN_22268	1109	24497584	NM_001818.2	NP_001809.2	3120598	I	193	TTATACAATAATGAGGAGCAGGTTGGACTGGCCATCCGAAGCAAGATTGC	+	5232219-5232268	0	0	0	AKR1C4	aldo-keto reductase family 1, member C4 (chlordecone reductase; 3-alpha hydroxysteroid dehydrogenase, type I; dihydrodiol dehydrogenase 4)	Cytoplasm	enzyme	-0.0678761	0.785257	0	0.0352979	0.897098	X
CLEC4A	0.0730668	9.99883	0.237741	0.814446	0.954644	-6.85395	0	1.38317	9.99883	4.50046	0.000207762	0.0040492	0.239699	1	ILMN_1709204	CLEC4A	ILMN_19122	50856	148536835	NM_194447.2	NP_919429.2	2570022	A	508	TTGGCAAGACAGTGAGAAGGACTGTGCTAGAATGGAGGCTCACCTGCTGG	+	8179527-8179576	0	0	0	CLEC4A	C-type lectin domain family 4, member A	Plasma Membrane	transmembrane receptor	-	-	-	-	-	-
CALU	-0.113533	9.25609	-0.910095	0.373367	0.757211	-6.4619	0	-0.709561	9.25609	-5.68793	1.32617e-05	0.000417278	2.98709	1	ILMN_1727194	CALU	ILMN_24697	813	6005991	NM_001219.2	NP_001210.1	940431	S	2978	GAACTGTGTGGCAAGAGAGCCTCACACCTCACTAGGTGCAGAGAGCCCAG	+	128198425-128198474	0	0	0	CALU	calumenin	Cytoplasm	other	-0.112533	0.596423	X	-0.58808	0.00746662	2
ASCC2	-1.03103	11.1085	-5.48194	2.11863e-05	0.000825825	2.65355	1	-0.348233	11.1085	-1.85153	0.0785778	0.367239	-5.41951	0	ILMN_1679919	ASCC2	ILMN_24019	84164	34147616	NM_032204.3	NP_115580.2	1570523	S	2674	CAAACCTCGGGCCACAAGACACCACTTCCCCTTTACCCTGGACAGCAGGA	-	28514657-28514706	0	0	0	ASCC2	activating signal cointegrator 1 complex subunit 2	unknown	other	0.0548751	0.931193	0	-0.445965	0.375319	X
CLEC5A	0.522029	10.0097	1.10584	0.281626	0.681606	-6.26695	0	2.66902	10.0097	5.65393	1.43235e-05	0.000445518	2.90986	1	ILMN_1780465	CLEC5A	ILMN_18708	23601	31747574	NM_013252.2	NP_037384.1	1260228	S	3237	CTAGGTCAGCCAACCCCCATCCAACCCTTAGACTCACGAACAAATCCACC	-	141273850-141273899	0	0	0	CLEC5A	C-type lectin domain family 5, member A	Plasma Membrane	other	-	-	-	-	-	-
CACNB3	1.15294	7.93419	4.94346	7.34929e-05	0.00218163	1.41912	1	1.91039	7.93419	8.19117	6.81427e-08	5.57035e-06	8.28509	1	ILMN_2195482	CACNB3	ILMN_14379	784	40316927	NM_000725.2	NP_000716.2	1980328	S	2577	GCACAGAGGACCTGTCTCCCCGGCTACTCTTGCCTTATGGCTCTAGTGTG	+	47508870-47508919	0	0	0	CACNB3	calcium channel, voltage-dependent, beta 3 subunit	Plasma Membrane	ion channel	-0.00117571	0.996746	0	0.136484	0.58443	d
CANX	-0.0757128	11.2153	-0.724582	0.476912	0.821164	-6.61421	0	-0.873923	11.2153	-8.36356	4.88685e-08	4.184e-06	8.61895	1	ILMN_1762825	CANX	ILMN_22642	821	66933003	NM_001746.3	NP_001737.1	1070402	A	4422	GCCCTTGCCTCTTCCTGCCCATGTGATTGCGGTGCAGTAGTTTCTGTTGT	+	179090717-179090766	0	0	0	CANX	calnexin	Cytoplasm	other	-0.00459135	0.983016	X	-0.802632	0.000557111	2
CANX	-0.0772491	11.4183	-0.696244	0.494108	0.830099	-6.6346	0	-0.761251	11.4183	-6.86113	1.01238e-06	5.07249e-05	5.57193	1	ILMN_2401057	CANX	ILMN_20955	821	66933004	NM_001024649.1	NP_001019820.1	5860477	A	4746	AAGCAGGACTGCATTATGGCACTTTTGCCTTGGTGGCCCACTTTCTCCAT	+	179091094-179091143	0	0	0	CANX	calnexin	Cytoplasm	other	-0.00459135	0.983016	X	-0.802632	0.000557111	2
CCDC106	-0.795073	9.31096	-4.78638	0.000106101	0.00291059	1.0556	1	-0.670838	9.31096	-4.03848	0.00061861	0.00993399	-0.839346	1	ILMN_1682567	CCDC106	ILMN_3112	29903	94536855	NM_013301.2	NP_037433.2	3940471	S	1898	CCACCTGATTCCCGGACAGACCTCCCCAACTCCGCGTGAGACAGAGAATT	+	60856244-60856293	0	0	0	CCDC106	coiled-coil domain containing 106	unknown	other	0.0233652	0.913145	0	-0.238326	0.148513	d
CLK1	0.617704	10.3873	3.97199	0.000723826	0.0133349	-0.834488	1	0.0589584	10.3873	0.379117	0.708506	0.925136	-6.99439	0	ILMN_1679727	CLK1	ILMN_162592	1195	67551260	NM_004071.2	NP_004062.2	3440138	A	1190	TTAGCCCTAGGGTGGTCCCAACCATGTGATGTCTGGAGCATAGGATGCAT	-	201428008-201428054:201429650-201429652	0	0	0	CLK1	CDC-like kinase 1	Nucleus	kinase	-	-	-	-	-	-
CAPN3	-0.206355	8.40477	-2.11568	0.0468164	0.271777	-4.78447	0	-0.819618	8.40477	-8.40325	4.52928e-08	3.94007e-06	8.69524	1	ILMN_1687971	CAPN3	ILMN_25522	825	27765071	NM_024344.1	NP_077320.1	3870441	A	2971	CAAACCCTTGTCCCTTTGCCATGTGGAGGAAAGTGCCTGCCTCTGGTCCG	+	40491480-40491529	0	0	0	CAPN3	calpain 3, (p94)	Cytoplasm	peptidase	-0.460823	0.0602918	X	-0.787608	0.00507706	2
CAPN3	-0.0957827	7.98783	-0.713248	0.483747	0.824723	-6.62246	0	-0.685299	7.98783	-5.1031	5.0696e-05	0.00125907	1.64463	1	ILMN_2332691	CAPN3	ILMN_8100	825	27765073	NM_173087.1	NP_775110.1	4180762	A	2647	CCCCTACCCATCCTTGATCGGTCATGCCTAGCCTGACCCTTTAGTAAAGC	+	40491414-40491463	0	0	0	CAPN3	calpain 3, (p94)	Cytoplasm	peptidase	-0.460823	0.0602918	X	-0.787608	0.00507706	2
CYP26A1	0.944872	8.27831	5.53611	1.87225e-05	0.000748317	2.77644	1	0.620911	8.27831	3.63799	0.0015897	0.021325	-1.76495	1	ILMN_1651490	CYP26A1	ILMN_23980	1592	16933529	NM_000783.2	NP_000774.2	3420474	I	77	CTGCTGCTCTTCCTGGCTGCGATCAAGCTCTGGGACCTGTACTGCGTGAG	+	94823733-94823782	0	0	0	CYP26A1	cytochrome P450, family 26, subfamily A, polypeptide 1	Cytoplasm	enzyme	-0.437309	0.198137	0	0.441275	0.197616	d
MAPK1	0.727849	8.77425	7.37426	3.47533e-07	3.24289e-05	6.74408	1	0.666243	8.77425	6.75009	1.28183e-06	6.11493e-05	5.33458	1	ILMN_1767320	MAPK1	ILMN_1351	5594	75709179	NM_138957.2	NP_620407.1	4560538	A	1150	GTAGAACAGGCTCTGGCCCACCCATATCTGGAGCAGTATTACGACCCGAG	-	20457168-20457217	0	1	1	MAPK1	mitogen-activated protein kinase 1	Cytoplasm	kinase	-0.280513	0.20077	0	0.308401	0.161588	d
CASP1	-0.187417	10.5907	-0.948727	0.353829	0.742107	-6.42615	0	-1.10085	10.5907	-5.57267	1.72268e-05	0.000519273	2.72483	1	ILMN_2326509	CASP1	ILMN_10621	834	73622111	NM_033294.2	NP_150636.1	450491	A	704	CCGCAAGGTTCGATTTTCATTTGAGCAGCCAGATGGTAGAGCGCAGATGC	-	104402250-104402293:104402779-104402784	0	0	0	CASP1	caspase 1, apoptosis-related cysteine peptidase (interleukin 1, beta, convertase)	Cytoplasm	peptidase	-0.201597	0.612049	X	-1.43007	0.00179682	2
CASP1	-0.231028	11.0351	-1.14726	0.264508	0.663985	-6.22137	0	-1.21078	11.0351	-6.0126	6.39845e-06	0.000225917	3.71854	1	ILMN_2326512	CASP1	ILMN_10621	834	73622111	NM_033294.2	NP_150636.1	7050382	A	728	GCAGCCAGATGGTAGAGCGCAGATGCCCACCACTGAAAGAGTGACTTTGA	-	104402226-104402275	0	1	0	CASP1	caspase 1, apoptosis-related cysteine peptidase (interleukin 1, beta, convertase)	Cytoplasm	peptidase	-0.201597	0.612049	X	-1.43007	0.00179682	2
SLC7A8	-1.02772	9.82091	-3.97203	0.000723751	0.0133349	-0.834386	1	-1.41102	9.82091	-5.45342	2.26139e-05	0.000648035	2.45221	1	ILMN_1807894	SLC7A8	ILMN_22403	23428	33286429	NM_182728.1	NP_877392.1	4860537	A	2788	TTGGTCTGAGTTGTGACCCCTTCAGAGTAGATGCCCGGCAGGCTGGGGTT	-	22664631-22664680	0	0	0	SLC7A8	solute carrier family 7 (amino acid transporter light chain, L system), member 8	Plasma Membrane	transporter	0.0133646	0.972734	0	-0.19612	0.535762	d
WDR52	1.20158	7.56796	10.7314	7.39371e-10	2.86371e-07	12.8099	1	0.461482	7.56796	4.12152	0.000508379	0.00844736	-0.645891	0	ILMN_2189037	WDR52	ILMN_28668	55779	31377845	NM_018338.2	NP_060808.2	3060403	S	2869	GGGAGAAATAAAGGCACGGAAGAGAGAGCAAATCAAAGCTTTGAGGAGTG	-	114564743-114564792	0	0	0	WDR52	WD repeat domain 52	unknown	other	-0.0613292	0.835909	0	0.000220064	0.999859	X
CBLB	0.188481	10.081	1.31719	0.202335	0.592555	-6.01924	0	-0.716837	10.081	-5.00957	6.3003e-05	0.00149911	1.4276	1	ILMN_1685580	CBLB	ILMN_18286	868	54112419	NM_170662.3	NP_733762.2	5270132	S	3661	GCGTGGTCAGGTCTGCTGTAACATTTCCCACCAACTCTCTTGCTGTCCAC	-	106860064-106860113	0	0	0	CBLB	Cas-Br-M (murine) ecotropic retroviral transforming sequence b	Nucleus	other	0.0019468	0.993825	X	-0.432969	0.0244176	2
CBLN1	0.0838828	7.11759	0.920987	0.367787	0.752978	-6.45196	0	0.70076	7.11759	7.69395	1.81745e-07	1.24049e-05	7.29926	1	ILMN_1712461	CBLN1	ILMN_28176	869	4757921	NM_004352.1	NP_004343.1	2140113	S	1460	ATCCTCGGCTGCTTGTTAGCAGAGAAAGGACTCACCTTAGTGGTGACTGG	-	47870204-47870253	0	0	0	CBLN1	cerebellin 1 precursor	Cytoplasm	other	0.367486	0.0950001	X	1.15471	0.000378447	2
CBLN3	-0.250763	8.9109	-2.23212	0.0369299	0.233786	-4.57153	0	0.619609	8.9109	5.51535	1.96303e-05	0.000577232	2.59395	1	ILMN_2053829	CBLN3	ILMN_45604	643866	126722638	NM_001039771.2	NP_001034860.1	6620291	S	2243	AGGAGAAGATGCCTCTGGAGTTTGGATCGGGTGTTACAGGTACAAGTAGG	-	23965631-23965680	0	0	0	CBLN3	cerebellin 3 precursor	Extracellular Space	other	-0.341736	0.202997	X	0.755129	0.0109557	2
CBX6	-0.151064	9.9572	-1.18563	0.249352	0.648833	-6.17784	0	0.805015	9.9572	6.31818	3.25936e-06	0.000131349	4.39623	1	ILMN_1691930	CBX6	ILMN_20870	23466	46852391	NM_014292.3	NP_055107.3	3370288	S	3102	GTGAGTGACCACCTGGGTGCCAGTTACAGGTGTTTCCAGAGACCATAGAA	-	37590310-37590359	0	0	0	CBX6	chromobox homolog 6	Nucleus	other	-0.238961	0.297527	X	0.573501	0.0183719	2
CCDC101	-0.435933	8.24678	-3.30081	0.0034898	0.0443861	-2.36096	0	-0.643048	8.24678	-4.86905	8.74392e-05	0.00197464	1.10064	1	ILMN_1684789	CCDC101	ILMN_5379	112869	19923934	NM_138414.1	NP_612423.1	5690131	A	1046	CAAGAAAAAGTGATGCCGCCTGGCAGACTCGCCATCCCCCAACGACACAG	+	28510515-28510528:28510529-28510564	0	0	0	CCDC101	coiled-coil domain containing 101	unknown	other	-0.562345	0.00704472	X	-0.59511	0.00437586	2
ACTR1B	0.844377	9.10687	7.17533	5.2383e-07	4.53261e-05	6.33602	1	-0.282545	9.10687	-2.40101	0.0259542	0.180304	-4.4268	0	ILMN_1695821	ACTR1B	ILMN_813	10120	13325060	NM_005735.2	NP_005726.1	2120088	S	1779	CCTTTTCAGAGCACTTCATCCACTTGCTCCTCCCTCTACCCTCGGCACCC	-	97639086-97639135	0	0	0	ACTR1B	ARP1 actin-related protein 1 homolog B, centractin beta (yeast)	Cytoplasm	other	0.739616	0.0104249	2	0.336605	0.187037	X
AP4B1	-0.740082	9.42948	-7.31939	3.88971e-07	3.55479e-05	6.63207	1	-0.16657	9.42948	-1.64737	0.114751	0.451693	-5.74262	0	ILMN_1669377	AP4B1	ILMN_20264	10717	5729741	NM_006594.1	NP_006585.1	510129	S	2210	CGCAATGAGTAGGGCTGGGTCTCGGCCATGGAAAGCATACCTCAGTGCTC	-	114239375-114239424	0	0	0	AP4B1	adaptor-related protein complex 4, beta 1 subunit	Cytoplasm	transporter	-0.806385	0.00168122	2	0.00994392	0.970221	X
ARHGAP24	0.895242	7.76442	10.0205	2.42578e-09	6.90807e-07	11.6496	1	0.00805985	7.76442	0.0902145	0.928994	0.984601	-7.06473	0	ILMN_1765876	ARHGAP24	ILMN_23772	83478	111154091	NM_001025616.2	NP_001020787.2	2260538	I	496	GGCGGCAGAATGCCATCAAGTGTGGGTGGCTGAGGAAGCAAGGAGGCTTT	+	86710765-86710814	0	0	0	ARHGAP24	Rho GTPase activating protein 24	Cytoplasm	other	1.00727	0.00176424	2	-0.257168	0.294378	X
ARHGDIB	-1.12927	13.9211	-4.43853	0.00024043	0.00561677	0.247819	1	0.0637214	13.9211	0.250452	0.804735	0.95406	-7.03635	0	ILMN_1678143	ARHGDIB	ILMN_9074	397	56676392	NM_001175.4	NP_001166.3	1570193	S	1086	TTGTGGTTGTTGCTGGCCCAATGAGTCCCTAGTCACATCCCCTGCCAGAG	-	14986297-14986346	0	0	0	ARHGDIB	Rho GDP dissociation inhibitor (GDI) beta	Cytoplasm	other	-1.0421	0.0186257	2	-0.0495798	0.931143	X
BASP1	0.904772	12.7938	6.55496	1.94823e-06	0.000128483	5.02862	1	0.0125307	12.7938	0.0907832	0.928548	0.984552	-7.06467	0	ILMN_1651826	BASP1	ILMN_28962	10409	30795230	NM_006317.3	NP_006308.3	2140121	S	1410	CAGACAGAGCCCACTTAGCTTGTCCACATGGATCTCAATGCCAATCCTCC	+	17329556-17329605	0	0	0	BASP1	brain abundant, membrane attached signal protein 1	Nucleus	transcription regulator	0.8615	0.00486953	2	-0.136083	0.631686	X
CCL13	-0.405546	7.87004	-1.64057	0.116167	0.452231	-5.57167	0	1.37613	7.87004	5.56691	1.74539e-05	0.000524499	2.7117	1	ILMN_1783593	CCL13	ILMN_16434	6357	22538799	NM_005408.2	NP_005399.1	1230605	S	647	GAGCTGCTGGCAGTGGGTTTGTATTCGGTTCCCAGGGGTTGAGAGCATGC	+	29709538-29709587	0	0	0	CCL13	chemokine (C-C motif) ligand 13	Extracellular Space	cytokine	-0.155201	0.92439	X	2.95251	0.0247042	2
BIRC3	1.24804	9.07469	4.66676	0.000140478	0.00363885	0.778114	1	0.115149	9.07469	0.430575	0.671278	0.912939	-6.97286	0	ILMN_1776181	BIRC3	ILMN_3897	330	33946283	NM_001165.3	NP_001156.1	5080021	A	5011	CCAGGAGTTTGAATCCATCCTGGGCAGCATACTGAGACCCTGCCTTTAAA	+	101713457-101713506	0	0	0	BIRC3	baculoviral IAP repeat containing 3	Cytoplasm	enzyme	1.37564	0.0151668	2	-0.0443842	0.950436	X
CCL2	0.551939	11.9114	1.4781	0.154606	0.5202	-5.80638	0	2.14123	11.9114	5.73427	1.19427e-05	0.000381433	3.09216	1	ILMN_1720048	CCL2	ILMN_25185	6347	56119169	NM_002982.3	NP_002973.1	1030333	S	323	CAGGATTCCATGGACCACCTGGACAAGCAAACCCAAACTCCGAAGACTTG	+	29607909-29607958	0	0	1	CCL2	chemokine (C-C motif) ligand 2	Extracellular Space	cytokine	0.6348	0.28896	X	2.67201	0.000872796	2
CASP7	0.640072	8.20769	5.76092	1.12458e-05	0.000497569	3.28339	1	-0.0758694	8.20769	-0.682856	0.502355	0.843031	-6.82891	0	ILMN_2373763	CASP7	ILMN_24813	840	73623016	NM_033339.3	NP_203125.1	5290465	A	2126	GTGAGCTGAGACAGATAAGAGAATACCTTGGTCTCACCTATCCTGCCCTC	+	115480117-115480166	0	0	1	CASP7	caspase 7, apoptosis-related cysteine peptidase	Cytoplasm	peptidase	0.660541	0.0395902	2	0.00162334	0.997249	X
CCDC109B	-0.643359	10.2446	-5.19192	4.12692e-05	0.00139572	1.99133	1	0.144476	10.2446	1.16593	0.257053	0.663122	-6.3838	0	ILMN_1801766	CCDC109B	ILMN_11144	55013	34147587	NM_017918.3	NP_060388.1	1780259	S	999	GACCTTGCTAAGGCTAAAGAATCCCTGAAACAGGCGCGTCATTCTCTCTG	+	110825961-110825972:110828120-110828157	0	0	0	CCDC109B	coiled-coil domain containing 109B	unknown	other	-0.776319	0.0025062	2	-0.312712	0.114893	X
CRLF3	-0.58762	9.28897	-6.83032	1.0807e-06	8.29252e-05	5.61535	1	0.0769154	9.28897	0.894042	0.381694	0.773273	-6.66073	0	ILMN_2155228	CRLF3	ILMN_22668	51379	27764872	NM_015986.2	NP_057070.2	670026	S	2375	GCACGTGTGTATCCAATCTGCCTGTGACATGCATTTTACTCTTTGCAGAG	-	26134257-26134306	0	0	0	CRLF3	cytokine receptor-like factor 3	Cytoplasm	transcription regulator	-0.725843	0.0131888	2	-0.356358	0.17534	X
CSF2	1.59708	7.29959	11.8139	1.34363e-10	7.62465e-08	14.462	1	-0.0871403	7.29959	-0.644593	0.526351	0.852963	-6.85479	0	ILMN_1661861	CSF2	ILMN_28163	1437	27437029	NM_000758.2	NP_000749.2	2750196	S	589	TGGACCTGCCCTGGGCCACACTGACCCTGATACAGGCATGGCAGAAGAAT	+	131439566-131439615	0	1	1	CSF2	colony stimulating factor 2 (granulocyte-macrophage)	Extracellular Space	cytokine	1.75453	0.000112793	2	0.242001	0.329833	X
CSK	-0.958326	11.5577	-6.10925	5.1628e-06	0.000270628	4.05824	1	0.191651	11.5577	1.22176	0.235686	0.640432	-6.31894	0	ILMN_1754121	CSK	ILMN_23996	1445	4758077	NM_004383.1	NP_004374.1	3170239	S	2260	CGTGTCTCCTCGGTCGCCCCGTGTTTGCGCTTGACCATGTTGCACTGTTT	+	72882402-72882451	0	1	0	CSK	c-src tyrosine kinase	Cytoplasm	kinase	-0.728471	0.00284432	2	-0.110292	0.607396	X
CCND3	0.446324	10.8574	1.53716	0.139571	0.494975	-5.72329	0	2.25043	10.8574	7.75061	1.62252e-07	1.14096e-05	7.41331	1	ILMN_1668721	CCND3	ILMN_2459	896	16950657	NM_001760.2	NP_001751.1	6380370	S	1938	GCCCTGTTGACACAGGTCTTTCCTAAGGCTGCAAGGTTTAGGCTGGTGGC	-	42010712-42010761	1	1	0	CCND3	cyclin D3	Nucleus	other	0.343074	0.174979	X	1.75837	8.72944e-05	2
CTNS	-0.590816	10.3788	-6.72638	1.34836e-06	9.73409e-05	5.39506	1	-0.120957	10.3788	-1.37709	0.183362	0.570656	-6.12492	0	ILMN_1807719	CTNS	ILMN_162678	1497	119943109	NM_004937.2	NP_004928.2	5910541	A	2751	GGGGGTCCCAGGACGTGCCTCATACATGACTTGAGCTTGTCAGTCCACTG	+	3511466-3511515	0	0	0	CTNS	cystinosin, lysosomal cystine transporter	Cytoplasm	transporter	-0.504844	0.00714681	2	0.0636053	0.737085	X
CXCR7	0.744941	7.22789	5.72633	1.21589e-05	0.000530278	3.20572	1	-0.0483727	7.22789	-0.371839	0.713835	0.92665	-6.99721	0	ILMN_2371458	CXCR7	ILMN_177987	57007	114155150	NM_001047841.1	NP_001041306.1	4860114	A	1735	GCGTCAGAGCCAGCTGAGGACAGGCTTGCCTGGACTTCTGTAAGATAGGA			0	0	0	CXCR7	chemokine (C-X-C motif) receptor 7	Plasma Membrane	G-protein coupled receptor	1.4627	0.00179251	2	0.139124	0.737227	X
DRAP1	-0.644019	10.3732	-3.38539	0.00286821	0.0383241	-2.17218	1	0.102452	10.3732	0.538557	0.596003	0.883112	-6.919	0	ILMN_2112301	DRAP1	ILMN_9412	10589	18426972	NM_006442.2	NP_006433.2	3990598	S	839	GGACGAAGAAGATTACGACTCCTAGCGCCTTCTGCCCCCCAGACCATAGC	+	65445458-65445482:65445483-65445507	0	0	0	DRAP1	DR1-associated protein 1 (negative cofactor 2 alpha)	Nucleus	transcription regulator	-0.732341	0.00220076	2	-0.0484178	0.832846	X
EFEMP2	0.691544	7.80538	3.56534	0.00188485	0.0277512	-1.76644	1	0.00623153	7.80538	0.0321274	0.974682	0.994679	-7.06843	0	ILMN_1653203	EFEMP2	ILMN_42286	30008	88703037	NM_016938.2	NP_058634.2	6100180	S	1810	AAACTCCACTCTGGACAGCGCCAGGAGGCCCTGGGTTCCATTCCTAACTC	-	65390567-65390616	0	0	0	EFEMP2	EGF containing fibulin-like extracellular matrix protein 2	Extracellular Space	other	0.852266	0.0263137	2	-0.16235	0.698375	X
CD14	0.362032	13.8615	1.94878	0.0651628	0.330226	-5.07677	0	0.694901	13.8615	3.74058	0.00124913	0.0175122	-1.52934	1	ILMN_1740015	CD14	ILMN_2570	929	91105163	NM_000591.2	NP_000582.1	7000369	S	1294	CAGCCTGACGAGCTGCCCGAGGTGGATAACCTGACACTGGACGGGAATCC	-	139991763-139991812	0	0	0	CD14	CD14 molecule	Plasma Membrane	transmembrane receptor	0.504408	0.216861	X	1.00157	0.0210772	2
CD151	-0.303736	11.9369	-2.64176	0.0154561	0.132123	-3.77163	0	-1.09177	11.9369	-9.49574	6.05349e-09	7.73357e-07	10.7118	1	ILMN_2326713	CD151	ILMN_44841	977	87159819	NM_139030.3	NP_620599.1	6330474	A	1413	CACTGCTGTACCCAGATGCCTACAACCATCCCTGCCACATACAGGTGCTC	+	828761-828810	0	0	0	CD151	CD151 molecule (Raph blood group)	Plasma Membrane	other	-0.210949	0.559891	X	-0.84058	0.0186902	2
COX17	0.380627	11.0246	2.89674	0.00877946	0.0885055	-3.2407	0	0.647502	11.0246	4.92778	7.62324e-05	0.00175734	1.2374	1	ILMN_2187718	COX17	ILMN_19252	10063	5031644	NM_005694.1	NP_005685.1	630735	S	34	GAGGCTGGCATAGATTTGGCTGTCTCCGCTCATAGCTGCTTTTGGCGCGA	-	120878850-120878899	0	0	0	COX17 (includes EG:10063)	COX17 cytochrome c oxidase assembly homolog (S. cerevisiae)	Cytoplasm	enzyme	-	-	-	-	-	-
CD226	0.320628	7.5096	2.64981	0.0151864	0.130572	-3.75522	0	0.623543	7.5096	5.15322	4.51351e-05	0.00114425	1.76073	1	ILMN_1687825	CD226	ILMN_3877	10666	5729807	NM_006566.1	NP_006557.1	3940754	S	2109	CTTGCCGCCATCCCAGGTCTAGCCTTAGGAGCAAATGTAGTAGATAGTCG	-	65681578-65681627	0	0	0	CD226	CD226 molecule	Plasma Membrane	other	0.32867	0.445384	X	1.09855	0.0140627	2
ELL	0.847524	8.72177	5.90457	8.14336e-06	0.000390002	3.6046	1	-0.209581	8.72177	-1.46012	0.159438	0.532939	-6.01332	0	ILMN_1736048	ELL	ILMN_23957	8178	47078265	NM_006532.2	NP_006523.1	6650086	S	3605	CCTCTGCCCTGGGAACCAGTCCAAGGGGCTGTCAGTTGAATTTGCCTTTT	-	18414826-18414875	0	0	0	ELL	elongation factor RNA polymerase II	Nucleus	transcription regulator	0.842186	0.0097458	2	0.139012	0.671912	X
CD300C	0.364186	8.49754	2.22032	0.0378372	0.237193	-4.59343	0	0.804357	8.49754	4.9039	8.06019e-05	0.00184586	1.18182	1	ILMN_1701906	CD300C	ILMN_3018	10871	142365512	NM_006678.3	NP_006669.1	3120091	S	1352	CCACCGTTTTCACAGGGAGAAGCAGGTCTAGGACTCCCCTGCACCTTTGC	-	70048957-70049006	0	0	0	CD300C	CD300c molecule	Plasma Membrane	transmembrane receptor	0.80127	0.0384247	X	0.956917	0.0165749	2
CD300LF	-0.512951	8.94389	-2.77289	0.0115772	0.107555	-3.50131	0	0.635671	8.94389	3.43628	0.00254791	0.0313365	-2.224	1	ILMN_2112357	CD300LF	ILMN_4334	146722	38455397	NM_139018.2	NP_620587.2	4540228	S	1679	CTTGAGCCCATTGAAACTGATCTTGAGCTCCTGGCCTCCAGAATTGCAGG	-	70202077-70202126	0	0	0	CD300LF	CD300 molecule-like family member f	unknown	other	-0.558817	0.151132	X	0.354933	0.384408	d
CD302	-0.195484	9.80668	-1.55699	0.134803	0.487909	-5.69482	0	-1.01295	9.80668	-8.06792	8.66351e-08	6.8193e-06	8.0439	1	ILMN_1716797	CD302	ILMN_5429	9936	32526899	NM_014880.3	NP_055695.2	4640630	S	2753	TGGGCAGTGCTGCTCTTAAATCCTACCTTCCACTCAACTCCCATACAACT	-	160334548-160334597	0	0	0	CD302	CD302 molecule	Plasma Membrane	transmembrane receptor	-0.472787	0.0866742	X	-1.52797	0.000273104	2
CD320	-0.226684	7.9054	-1.27132	0.217874	0.612305	-6.07615	0	-0.94976	7.9054	-5.32659	3.02507e-05	0.000821534	2.16091	1	ILMN_2115633	CD320	ILMN_4822	51293	51702225	NM_016579.2	NP_057663.1	2340327	S	1014	ACCTGAGCTCTTCTGGCCACGTGGAACCTCGAACCCGAGCTCCTGCAGAA	-	8273197-8273246	0	0	0	CD320	CD320 molecule	Plasma Membrane	other	-0.370025	0.481216	X	-1.24211	0.0193377	2
EMILIN1	0.639	7.39422	5.39473	2.58682e-05	0.000968113	2.45515	1	0.0239629	7.39422	0.202306	0.841675	0.964393	-7.04767	0	ILMN_1711439	EMILIN1	ILMN_18157	11117	5901943	NM_007046.1	NP_008977.1	6760719	S	3235	GCCGCCCATGCAGACTTTTGGCCTGGCGCGATCCCCCAAGAACCCCTCCA	+	27162571-27162620	0	0	0	EMILIN1	elastin microfibril interfacer 1	Extracellular Space	other	1.15165	0.00237964	2	-0.0513561	0.892366	X
EMILIN2	-0.80433	11.9775	-5.71165	1.25689e-05	0.000545233	3.17274	1	0.107295	11.9775	0.761915	0.454802	0.817446	-6.77092	0	ILMN_1697268	EMILIN2	ILMN_1610	84034	60498977	NM_032048.2	NP_114437.2	1190142	S	3844	ACTTAACCTGCTCAGGCGGGCCTTCGCCCAGCTGCAAATAGGGATGCGTT	+	2903925-2903974	0	0	0	EMILIN2	elastin microfibril interfacer 2	Extracellular Space	other	-0.678022	0.00640234	2	-0.0452148	0.865942	X
CD37	-0.209665	10.0382	-0.893835	0.381802	0.763009	-6.47654	0	-1.30399	10.0382	-5.55911	1.77667e-05	0.000532913	2.69391	1	ILMN_2375825	CD37	ILMN_20101	951	91807111	NM_001774.2	NP_001765.1	1510133	A	722	CTCAGCAGGCTTGGACACCTGGCGCGGTCCAGACACAGTGCAGACATCTG	+	54533922-54533971	0	0	0	CD37	CD37 molecule	Plasma Membrane	other	-0.449591	0.110588	X	-1.3162	0.00071895	2
CD37	-0.231584	10.4222	-0.935096	0.360642	0.748079	-6.43892	0	-1.22613	10.4222	-4.95091	7.2228e-05	0.00167923	1.29123	1	ILMN_1786176	CD37	ILMN_20101	951	4502662	NM_001774.1	NP_001765.1	3800373	S	617	CGGCGACCAACGACTCCACAATCCTAGATAAGGTGATCTTGCCCCAGCTC	+	54533875-54533924	0	0	0	CD37	CD37 molecule	Plasma Membrane	other	-0.449591	0.110588	X	-1.3162	0.00071895	2
CD38	0.530398	8.00344	4.2752	0.000353559	0.00758436	-0.131771	0	0.594512	8.00344	4.79197	0.00010472	0.00229998	0.920925	1	ILMN_2233783	CD38	ILMN_8672	952	38454325	NM_001775.2	NP_001766.2	2760500	S	1064	TACATGACTCAGCATACCTGCTGGTGCAGAGCTGAAGATTTTGGAGGGTC	+	15459377-15459426	0	0	1	CD38	CD38 molecule	Plasma Membrane	enzyme	1.05028	0.0347507	X	1.61773	0.00408352	2
CD4	0.249666	9.36035	1.26117	0.221436	0.616071	-6.08852	0	-0.945462	9.36035	-4.77593	0.000108732	0.00236785	0.883482	1	ILMN_1727284	CD4	ILMN_28131	920	91992151	NM_000616.3	NP_000607.1	6770711	S	2802	TGCCCCACACCCTCCCTTACCCTCCTCCAGACCATTCAGGACACAGGGAA	+	6799936-6799985	0	0	0	CD4	CD4 molecule	Plasma Membrane	transmembrane receptor	0.0519082	0.795166	X	-0.523641	0.00620501	2
FRAT2	-0.732216	9.58216	-4.83887	9.38328e-05	0.00264695	1.17719	1	-0.00948082	9.58216	-0.0626542	0.95065	0.989922	-7.06692	0	ILMN_1788213	FRAT2	ILMN_164196	23401	31317237	NM_012083.2	NP_036215.1	7330026	S	1966	TGTGACTCTCCCAGAGAAGAAGCCGCTGGCTGTATGAAACTTGACGGCGC	-	99082433-99082482	0	0	0	FRAT2	frequently rearranged in advanced T-cell lymphomas 2	Cytoplasm	other	-1.03794	0.00101294	2	0.0465332	0.868873	X
GCKR	2.09026	7.35135	29.9657	2.19268e-18	5.35035e-14	29.943	1	-0.0207897	7.35135	-0.298039	0.768678	0.942671	-7.02281	0	ILMN_1815530	GCKR	ILMN_165705	2646	30795244	NM_001486.2	NP_001477.1	6960059	S	1770	ACAGGTGATACCCATCGCCTTGCTGAGCCTCCTATTCCGGTGCTCGATCA	+	27598962-27598965:27599640-27599685	0	0	0	GCKR	glucokinase (hexokinase 4) regulator	Nucleus	other	4.2972	5.73442e-06	2	0.34952	0.23644	X
GK5	0.901451	7.72033	6.82932	1.08301e-06	8.2972e-05	5.61322	1	-0.113037	7.72033	-0.856362	0.401714	0.787453	-6.69383	0	ILMN_1673892	GK5	ILMN_31126	256356	88196791	NM_001039547.1	NP_001034636.1	6180543	S	1541	GGGTGCAGCTTCTCTAGCTGGCCTTGCTGTTGGGTTTTGGACTGACAAGG	-	143367284-143367302:143371857-143371887	0	0	0	GK5	glycerol kinase 5 (putative)	unknown	other	1.35162	0.0145849	2	0.260507	0.648339	X
CRYZ	0.682346	8.50667	4.19514	0.000427189	0.00884877	-0.317656	1	0.917853	8.50667	5.64306	1.46807e-05	0.000454047	2.88516	1	ILMN_1672389	CRYZ	ILMN_30248	1429	14251216	NM_001889.2	NP_001880.2	3850010	S	1649	CATTATTGGTTGGCTGCCAATGACCCCATATGTTCTGTGAGAATAGTAGC	-	74943960-74944009	0	0	0	CRYZ	crystallin, zeta (quinone reductase)	Cytoplasm	enzyme	-	-	-	-	-	-
CD44	0.527504	13.4002	2.86361	0.00945681	0.0930922	-3.31088	0	1.47005	13.4002	7.98033	1.0288e-07	7.81101e-06	7.87122	1	ILMN_1803429	CD44	ILMN_10947	960	48255940	NM_001001391.1	NP_001001391.1	5860152	A	4419	TGACCACTGTTATTGTTACTTTGACTTTTCAGAGCACACCCTTCCTCTGG	+	35210355-35210404	0	0	0	CD44 (includes EG:100330801)	CD44 molecule (Indian blood group)	Plasma Membrane	other	0.746274	0.00704472	X	1.37319	0.000211355	2
GLRX	1.30509	10.2303	5.07373	5.4272e-05	0.00173223	1.71962	1	0.108618	10.2303	0.422269	0.677232	0.915274	-6.97652	0	ILMN_1737308	GLRX	ILMN_22606	2745	4504024	NM_002064.1	NP_002055.1	4590228	S	982	AGTTGGTCTTGGTGTCATATGGATCAGAGGCACAAGTGCAGAGGCTGTGG	-	95175728-95175777	0	0	0	GLRX	glutaredoxin (thioltransferase)	Cytoplasm	enzyme	1.3822	0.00982493	2	-0.175501	0.754967	X
GPI	0.864631	10.4352	3.96177	0.000741497	0.0135835	-0.858078	1	-0.170502	10.4352	-0.781247	0.443601	0.811797	-6.75583	0	ILMN_2173451	GPI	ILMN_7872	2821	18201904	NM_000175.2	NP_000166.2	4220064	S	1755	AGCAGCGCGAGGCCAGAGTCCAATAAACTCGTGCTCATCTGCAGCCTCCT	+	39582756-39582781:39582782-39582805	0	0	0	GPI	glucose-6-phosphate isomerase	Extracellular Space	enzyme	0.888213	0.00963678	2	0.0278695	0.946097	X
HAMP	1.2444	9.19448	4.77771	0.00010828	0.00295541	1.03549	1	-0.524491	9.19448	-2.01371	0.0573764	0.304324	-5.1439	0	ILMN_1729188	HAMP	ILMN_25191	57817	50541944	NM_021175.2	NP_066998.1	1050414	S	239	AAGGAGGCGAGACACCCACTTCCCCATCTGCATTTTCTGCTGCGGCTGCT	+	40467698-40467747	0	0	0	HAMP	hepcidin antimicrobial peptide	Extracellular Space	other	1.77604	0.000661508	2	0.773055	0.031019	X
CD74	-0.485393	14.1283	-2.23774	0.0365046	0.231905	-4.56107	0	-1.18579	14.1283	-5.46669	2.19379e-05	0.000630886	2.48261	1	ILMN_1736567	CD74	ILMN_21963	972	68448543	NM_001025159.1	NP_001020330.1	1240070	A	1162	CCCCGTTCCTGACATCACAGCAGCCTCCAACACAAGGCTCCAAGACCTAG	-	149761686-149761735	0	0	0	CD74	CD74 molecule, major histocompatibility complex, class II invariant chain	Plasma Membrane	transmembrane receptor	-0.610096	0.0738735	X	-1.65084	0.000558047	2
CD74	-0.236737	13.1723	-0.831299	0.415399	0.785652	-6.53054	0	-1.6775	13.1723	-5.89051	8.40401e-06	0.00028761	3.44479	1	ILMN_2379644	CD74	ILMN_21746	972	68448524	NM_004355.2	NP_004346.1	7040008	A	1038	AAGGCACAGGGAGAAGGGATAACCCTACACCCAGACCCCAGGCTGGACAT	-	149761618-149761667	0	0	0	CD74	CD74 molecule, major histocompatibility complex, class II invariant chain	Plasma Membrane	transmembrane receptor	-0.610096	0.0738735	X	-1.65084	0.000558047	2
HIP1	0.776307	7.87401	4.22982	0.000393574	0.00829287	-0.237152	1	-0.0824949	7.87401	-0.449485	0.657806	0.907432	-6.96428	0	ILMN_1701403	HIP1	ILMN_21141	3092	38045918	NM_005338.4	NP_005329.3	580484	S	6990	TGCAGCCGTCCATAGCAGTACCCCTAAAATCCCACCAGAATACGGGTCCC	-	75001544-75001593	0	0	0	HIP1 (includes EG:176224)	huntingtin interacting protein 1	Cytoplasm	other	0.576931	0.00948332	2	0.00464986	0.987333	X
HNRNPAB	-0.839265	9.80385	-5.1022	5.08013e-05	0.00164404	1.78516	1	-0.239312	9.80385	-1.45487	0.160873	0.535613	-6.02054	0	ILMN_2335718	HNRNPAB	ILMN_1758	3182	55956920	NM_004499.3	NP_004490.2	3370487	A	1117	GCGGCAGCAGGAGCGACCAACTGATCGCACACATGCTTTGTTTGGATATG	+	177570232-177570281	0	0	0	HNRNPAB	heterogeneous nuclear ribonucleoprotein A/B	Nucleus	enzyme	-0.416551	0.0255025	2	0.607782	0.0036087	X
HSP90AA1	0.723993	12.5146	4.58928	0.000168547	0.00420524	0.59819	1	0.263499	12.5146	1.67028	0.110088	0.442184	-5.70776	0	ILMN_2373515	HSP90AA1	ILMN_27537	3320	40254815	NM_005348.2	NP_005339.2	7050332	A	2842	CCCAGTCTTGTGGATGGAAATGTAGTGCTCGAGTCACATTCTGCTTAAAG	-	101617169-101617218	1	0	0	HSP90AA1	heat shock protein 90kDa alpha (cytosolic), class A member 1	Cytoplasm	enzyme	1.00912	0.0219348	2	-0.395785	0.347892	X
IL6	1.93235	7.3699	10.9234	5.41529e-10	2.16621e-07	13.1128	1	0.0976071	7.3699	0.551765	0.587085	0.879965	-6.91161	0	ILMN_1699651	IL6	ILMN_6469	3569	10834983	NM_000600.1	NP_000591.1	4040576	S	667	TGCAGTCCAGCCTGAGGGCTCTTCGGCAAATGTAGCATGGGCACCTCAGA	+	22737683-22737717:22737718-22737732	0	1	1	IL6	interleukin 6 (interferon, beta 2)	Extracellular Space	cytokine	2.95538	4.1034e-05	2	-0.061525	0.884888	X
CD9	-0.269562	9.54801	-1.19508	0.245721	0.644678	-6.16692	0	-1.28775	9.54801	-5.70912	1.26411e-05	0.000400851	3.03516	1	ILMN_1695423	CD9	ILMN_4953	928	21237762	NM_001769.2	NP_001760.1	6250487	S	489	GGACACCTACAACAAGCTGAAAACCAAGGATGAGCCCCAGCGGGAAACGC	+	6214685-6214734	0	0	0	CD9	CD9 molecule	Plasma Membrane	other	-0.536827	0.159962	X	-1.46216	0.00223065	2
CD97	-0.0503172	8.31055	-0.289236	0.77531	0.942996	-6.83991	0	-0.639315	8.31055	-3.67495	0.00145756	0.019836	-1.68021	1	ILMN_2413508	CD97	ILMN_26604	976	68508947	NM_001784.3	NP_001775.2	1470626	A	2458	CCTCCCTGATCCCGTGTGCCACCAGGAGGGAGTGGCAGCTATAGTCTGGC	+	14380039-14380088	0	0	0	CD97	CD97 molecule	Plasma Membrane	G-protein coupled receptor	-0.321468	0.447629	X	-1.49982	0.00260078	2
CT45-4	0.36062	8.08171	2.75208	0.012124	0.111009	-3.54462	0	1.18691	8.08171	9.05795	1.33169e-08	1.48039e-06	9.9228	1	ILMN_2135944	CT45-4	ILMN_23269	441520	62945407	NM_001017436.1	NP_001017436.1	7510128	S	921	TGCTGAAGTCTCCTGGCATATGTTACCGAATCAAATAGCCTTCCAGAGGC	-	134756400-134756449	0	0	0	CT45A2 (includes others)	cancer/testis antigen family 45, member A2	unknown	other	-	-	-	-	-	-
CD97	-0.435574	11.1994	-2.62802	0.0159272	0.134604	-3.7996	0	-1.16319	11.1994	-7.01805	7.27305e-07	3.86644e-05	5.90458	1	ILMN_1673363	CD97	ILMN_26363	976	68508935	NM_078481.2	NP_510966.1	6960630	A	2951	GGGCGCTTGTCCCATCCTGGACTTTTCCTCTCATGTCTTTGCTGCAGAAC	+	14380253-14380302	0	0	0	CD97	CD97 molecule	Plasma Membrane	G-protein coupled receptor	-0.321468	0.447629	X	-1.49982	0.00260078	2
INTS9	-0.659366	9.9283	-4.83799	9.4026e-05	0.00264781	1.17515	1	0.0931714	9.9283	0.683629	0.501877	0.842828	-6.82837	0	ILMN_1777118	INTS9	ILMN_10115	55756	8922725	NM_018250.1	NP_060720.1	6560468	S	2392	CTCGGCCAGGGGAGCCAGCCTTTGGTTTCGTTTACTTGCCTACAGTGCTG	-	28681197-28681246	0	0	0	INTS9	integrator complex subunit 9	Nucleus	other	-0.700525	0.00741574	2	-0.0886544	0.737657	X
CDC16	-0.536179	10.631	-6.5838	1.83078e-06	0.000122559	5.09054	0	-0.605158	10.631	-7.43081	3.09572e-07	1.90754e-05	6.76371	1	ILMN_2339796	CDC16	ILMN_175130	8881	118402577	NM_001078645.1	NP_001072113.1	3170561	A	2179	TAGGAACAGAGACCCGCCTTAAGAGACTGGATCGCACACCTTTGCAACAG	+	114056138-114056187	0	0	0	CDC16	cell division cycle 16 homolog (S. cerevisiae)	Nucleus	other	-0.640297	0.00815192	X	-0.63533	0.00713345	2
ISCU	-0.85036	11.2151	-9.34908	7.86266e-09	1.69037e-06	10.4949	1	-0.0365363	11.2151	-0.401689	0.692077	0.919916	-6.98528	0	ILMN_2409062	ISCU	ILMN_2025	23479	56699455	NM_213595.1	NP_998760.1	780168	A	555	CCAGCTGTTTCCCACCTGCTGTGCAGTCACCTTAGATGTTCAGAAGCCGC	+	107486856-107486905	0	0	0	ISCU	iron-sulfur cluster scaffold homolog (E. coli)	Cytoplasm	other	-0.891667	0.000911603	2	0.0542816	0.814053	X
KIAA1199	2.83202	7.71013	11.5701	1.95221e-10	1.01353e-07	14.1015	1	0.196418	7.71013	0.802461	0.431507	0.805015	-6.73886	0	ILMN_1813704	KIAA1199	ILMN_10606	57214	38638697	NM_018689.1	NP_061159.1	110181	S	6882	GCAACGCTCCTCTGAAATGCTTGTCTTTTTTCTGTTGCCGAAATAGCTGG	+	79030856-79030905	0	0	0	KIAA1199	KIAA1199	Cytoplasm	other	3.60676	0.000158165	2	-0.00029616	0.999859	X
CDC37	0.0439697	13.0303	0.259614	0.797755	0.949979	-6.84832	0	0.598085	13.0303	3.53133	0.00204096	0.0261288	-2.00845	1	ILMN_1668369	CDC37	ILMN_19197	11140	39995072	NM_007065.3	NP_008996.1	4150670	S	1571	CCGGCTCTCGTCACTGGGCTCTGTTTTCACTGTTCGTCTGCTGTCTGTGT	-	10362859-10362908	0	0	0	CDC37	cell division cycle 37 homolog (S. cerevisiae)	Cytoplasm	other	0.453185	0.0163259	X	0.0808433	0.68418	d
LCOR	0.645698	8.48282	5.2746	3.40973e-05	0.00120581	2.18082	1	0.0569525	8.48282	0.465236	0.646675	0.903203	-6.95686	0	ILMN_1689817	LCOR	ILMN_13953	84458	142378882	NM_032440.2	NP_115816.1	6760364	S	4329	GTGTTTCAGTGGATGACAATCGAGCAGCAGAAGAATGGTGTGCCTACCCT	+	98708150-98708199	0	0	0	LCOR	ligand dependent nuclear receptor corepressor	Nucleus	transcription regulator	0.563526	0.00979824	2	-0.188197	0.339911	X
LEPREL1	0.72084	7.46874	6.68698	1.4669e-06	0.0001039	5.31117	1	-0.0178428	7.46874	-0.165521	0.870158	0.973347	-7.05471	0	ILMN_1657373	LEPREL1	ILMN_11123	55214	27764881	NM_018192.2	NP_060662.2	4280524	S	3309	CCATGGCCAGGTTGCCTAGGAGTGGGGTCCACTGATGAAAAGAGGTGTTT	-	191157361-191157410	0	0	0	LEPREL1	leprecan-like 1	unknown	enzyme	0.556789	0.0198053	2	0.114877	0.648674	X
LEPROTL1	-0.657036	8.9098	-4.07543	0.000566882	0.0110088	-0.595206	1	0.154621	8.9098	0.959077	0.348715	0.747643	-6.60053	0	ILMN_1752591	LEPROTL1	ILMN_4515	23484	7662509	NM_015344.1	NP_056159.1	6370164	S	2436	GCACTGCTACTGTTTTATCCACTTGGCCACAGACTTTTTCTAACAGCTGC	+	30084876-30084925	0	0	0	LEPROTL1	leptin receptor overlapping transcript-like 1	Plasma Membrane	other	-0.961871	0.0082656	2	-0.0863057	0.827369	X
LYAR	-0.612674	8.47128	-6.66062	1.55213e-06	0.00010814	5.25494	1	0.0332791	8.47128	0.36179	0.721218	0.929139	-7.00103	0	ILMN_2221564	LYAR	ILMN_23200	55646	8923397	NM_017816.1	NP_060286.1	5310369	S	1210	ACACAGTGACAGATGAGCATCACAGATCCGAAGAGGAACTCCTGGTCATC	-	4320585-4320634	0	0	0	LYAR	Ly1 antibody reactive homolog (mouse)	Plasma Membrane	other	-0.871233	0.0089831	2	-0.330007	0.261381	X
CDC42SE2	0.0288757	8.65181	0.269096	0.79055	0.947344	-6.84572	0	0.697942	8.65181	6.5042	2.17413e-06	9.39787e-05	4.80327	1	ILMN_2313926	CDC42SE2	ILMN_28719	56990	84697025	NM_001038702.1	NP_001033791.1	6770161	A	3114	AGGCATGAAGTGGTGCCAGTAAGCGTAGAGCGGAAATGTTGACTTTAGTT	+	130757908-130757957	0	0	0	CDC42SE2	CDC42 small effector 2	Plasma Membrane	other	0.60577	0.0655991	X	0.699219	0.0368616	2
MMP1	0.687102	7.16114	12.1774	7.78037e-11	5.27358e-08	14.9876	1	-0.0215588	7.16114	-0.382084	0.706338	0.924368	-6.99322	0	ILMN_1726448	MMP1	ILMN_26214	4312	13027798	NM_002421.2	NP_002412.1	3360224	S	1810	CAAGACAGAAAGAGACAGGAGACATGAGTCTTTGCCGGAGGAAAAGCAGC	-	102165974-102166023	0	0	0	MMP1 (includes EG:300339)	matrix metallopeptidase 1 (interstitial collagenase)	Extracellular Space	peptidase	7.03143	2.48272e-05	2	4.07228	0.000242051	X
MRTO4	-0.788786	8.38836	-7.56044	2.37856e-07	2.45595e-05	7.12098	1	-0.265564	8.38836	-2.54541	0.0190577	0.145571	-4.1411	0	ILMN_1689800	MRTO4	ILMN_1930	51154	118572609	NM_016183.3	NP_057267.2	130220	S	1022	GGACCATCAGGACTGCTGCCGCCCCTCTGGAGAGAGCAGCTTTTTATTTG	+	19457958-19458007	0	0	0	MRTO4	mRNA turnover 4 homolog (S. cerevisiae)	Cytoplasm	other	-1.2813	0.00676157	2	0.0276482	0.960864	X
NARS	-0.650239	9.61113	-3.9119	0.000834155	0.0149471	-0.973168	1	0.0478008	9.61113	0.287574	0.776565	0.945329	-7.02599	0	ILMN_1732216	NARS	ILMN_6062	4677	150010642	NM_004539.3	NP_004530.1	5220653	S	2731	TCTGTGCTACCTTATTAACTCACAGCAGGCTTACTGAATGGCTTCATTTC	-	53418976-53419025	0	0	0	NARS	asparaginyl-tRNA synthetase	Cytoplasm	enzyme	-0.734293	0.00364686	2	-0.42103	0.0411745	X
CUTL1	0.234534	9.46691	1.1975	0.244798	0.643807	-6.16412	0	0.845137	9.46691	4.31517	0.000321703	0.00578686	-0.193686	1	ILMN_2278636	CUTL1	ILMN_172477	1523	31652239	NM_181552.1	NP_853530.1	6940402	I	5021	GTGATTTCCACAGGTTCTGGAATAACTCTTACAGCTTTGCCTTGTGTCCT	+	101679507-101679556	0	0	0	CUX1	cut-like homeobox 1	Nucleus	transcription regulator	-	-	-	-	-	-
CDK4	-0.51162	9.70605	-4.89548	8.2203e-05	0.00238932	1.30819	0	-1.01431	9.70605	-9.70547	4.18387e-09	5.72605e-07	11.081	1	ILMN_1689001	CDK4	ILMN_2567	1019	16936531	NM_000075.2	NP_000066.1	7380110	S	1189	GGACACTGAGAGGGCAATCTTTGCCTTTATCTCTGAGGCTATGGAGGGTC	-	56428474-56428523	1	1	0	CDK4	cyclin-dependent kinase 4	Nucleus	kinase	-0.592521	0.0483825	X	-1.21885	0.00133353	2
NDUFS8	-0.886932	11.3467	-5.76292	1.11951e-05	0.000496677	3.28788	1	0.16926	11.3467	1.09978	0.284196	0.692227	-6.45719	0	ILMN_1794132	NDUFS8	ILMN_24953	4728	4505370	NM_002496.1	NP_002487.1	1070538	S	683	CGAGATCGCCGCCAACATCCAGGCTGACTACTTGTATCGGTGACGCCCCA	+	67560594-67560636:67560637-67560643	0	0	0	NDUFS8	NADH dehydrogenase (ubiquinone) Fe-S protein 8, 23kDa (NADH-coenzyme Q reductase)	Cytoplasm	enzyme	-0.418104	0.0420282	2	-0.0790566	0.737657	X
NUP93	-0.72281	9.51914	-8.1088	7.99848e-08	1.04091e-05	8.20273	1	-0.0474951	9.51914	-0.532821	0.599896	0.885155	-6.92216	0	ILMN_2196569	NUP93	ILMN_29463	9688	41281436	NM_014669.2	NP_055484.2	5310068	S	2365	CGAGGACCGCGACTCTCAACTCCGAAGTCAAGCCCGCACTCTGATTACCT	+	55433231-55433246:55435912-55435945	0	0	0	NUP93	nucleoporin 93kDa	Nucleus	other	-0.783408	0.00543727	2	0.187117	0.447982	X
CDK5RAP2	0.525196	9.62107	2.73392	0.012621	0.114209	-3.58228	0	0.805133	9.62107	4.19114	0.000431247	0.0073767	-0.483458	1	ILMN_1655990	CDK5RAP2	ILMN_9876	55755	58535450	NM_018249.4	NP_060719.4	5690228	A	6117	AGTTGAGGCTGTGCGCCTTGGTGGGCTTCACGTCTTCCCCTGGATTTGCT	-	122191031-122191080	0	0	0	CDK5RAP2	CDK5 regulatory subunit associated protein 2	Cytoplasm	other	1.11535	0.0186005	X	1.12705	0.0160501	2
CDK5RAP3	-0.548945	11.0317	-4.49184	0.000212029	0.00506234	0.371739	0	-0.806348	11.0317	-6.59808	1.77534e-06	8.02967e-05	5.00702	1	ILMN_2383489	CDK5RAP3	ILMN_10217	80279	28872787	NM_025197.2	NP_079473.2	650601	A	2282	GCGCCCTGTGAACCTGATGGGAACCTCTCTGTGACACCCTCCGTGTTCTT	+	43413834-43413883	0	0	0	CDK5RAP3	CDK5 regulatory subunit associated protein 3	Cytoplasm	other	-0.542262	0.062091	X	-0.652501	0.028784	2
CDK5RAP3	-0.50675	11.1188	-3.93925	0.000781998	0.0141659	-0.910072	0	-0.720331	11.1188	-5.59954	1.62056e-05	0.000493059	2.78608	1	ILMN_1812557	CDK5RAP3	ILMN_9170	80279	28872791	NM_176096.1	NP_788276.1	5550465	A	1579	GTGAACCTGATGGGAACCTCTCTGTGACACCCTCCGTGTTCTTGCCTGCC	+	43413841-43413867:43413868-43413890	0	0	0	CDK5RAP3	CDK5 regulatory subunit associated protein 3	Cytoplasm	other	-0.542262	0.062091	X	-0.652501	0.028784	2
PCMT1	-0.832231	10.7256	-5.28234	3.3495e-05	0.00118891	2.19852	1	0.105368	10.7256	0.668793	0.511102	0.846767	-6.83859	0	ILMN_1671621	PCMT1	ILMN_26580	5110	4885538	NM_005389.1	NP_005380.1	6220487	S	1525	GTGTAAGCTGTGTCCTAGTTCTTGAACAGTTTATGCAGTGCTGCTTTGCC	+	150174175-150174224	0	0	0	PCMT1	protein-L-isoaspartate (D-aspartate) O-methyltransferase	Cytoplasm	enzyme	-0.799191	0.00169419	2	-0.164155	0.405462	X
PFN1	-0.829515	12.3511	-5.39892	2.56205e-05	0.000962534	2.46471	1	-0.10767	12.3511	-0.700771	0.491337	0.837727	-6.8163	0	ILMN_1712950	PFN1	ILMN_2354	5216	16753213	NM_005022.2	NP_005013.1	2850402	S	419	GGGGCCCCCACCTTCAATGTCACTGTCACCAAGACTGACAAGACGCTAGT	-	4790030-4790037:4790668-4790709	0	0	0	PFN1	profilin 1	Cytoplasm	other	-0.70245	0.0147127	2	0.0145776	0.968297	X
CDKN2D	0.561996	7.90734	4.85416	9.05359e-05	0.00257179	1.21259	0	0.977613	7.90734	8.444	4.19022e-08	3.69485e-06	8.77334	1	ILMN_1748883	CDKN2D	ILMN_29667	1032	39995073	NM_079421.2	NP_524145.1	7050326	A	884	CTAGAAGCTGGTGGCCTTGGCCGGCTGTGCTCAGAGACCTGAAGTGTGCA	-	10538349-10538398	1	0	0	CDKN2D	cyclin-dependent kinase inhibitor 2D (p19, inhibits CDK4)	Nucleus	transcription regulator	0.958501	0.0909533	X	1.79414	0.00590766	2
CDR2L	0.232188	7.85643	1.93612	0.0667866	0.334644	-5.09829	0	0.865657	7.85643	7.21836	4.79123e-07	2.72519e-05	6.32442	1	ILMN_2128770	CDR2L	ILMN_26231	30850	32698689	NM_014603.1	NP_055418.1	3940482	S	3413	CTGCTCCCCAGCTCTGTAGTGGCAGACCAGCGTCACCTTTGAAGTATACG	+	70513367-70513416	0	0	0	CDR2L	cerebellar degeneration-related protein 2-like	unknown	other	0.026616	0.91875	X	0.0396472	0.876484	d
PFN1	-0.771883	14.033	-5.86571	8.88444e-06	0.000415666	3.51792	1	-0.0524803	14.033	-0.39881	0.694164	0.920664	-6.98647	0	ILMN_2151817	PFN1	ILMN_2354	5216	16753213	NM_005022.2	NP_005013.1	6940066	S	699	GGCTGGATGGACAGACACCTCCCCCTACCCATATCCCTCCCGTGTGTGGT	-	4789750-4789799	0	0	0	PFN1	profilin 1	Cytoplasm	other	-0.70245	0.0147127	2	0.0145776	0.968297	X
CEBPB	0.293336	13.8698	2.89559	0.00880218	0.0886208	-3.24314	0	1.04218	13.8698	10.2876	1.54193e-09	2.58642e-07	12.0768	1	ILMN_1693014	CEBPB	ILMN_4674	1051	28872795	NM_005194.2	NP_005185.2	20446	S	1601	GACTGACGCAACCCACGTGTAACTGTCAGCCGGGCCCTGAGTAATCGCTT	+	48242383-48242432	0	0	0	CEBPB (includes EG:1051)	CCAAT/enhancer binding protein (C/EBP), beta	Nucleus	transcription regulator	0.480647	0.00906533	X	1.14019	7.58424e-05	2
CECR1	-0.394267	13.8559	-2.72312	0.0129257	0.11617	-3.60463	0	-1.04851	13.8559	-7.24182	4.56432e-07	2.62985e-05	6.37322	1	ILMN_1751851	CECR1	ILMN_29872	51816	29029551	NM_177405.1	NP_803124.1	6200064	A	2825	CACTGTCTCAGAGAGGTTTTCCTGTGCTCGCCCTGTTTCTCTCAGGAAGC	-	16040388-16040437	0	0	0	CECR1	cat eye syndrome chromosome region, candidate 1	Extracellular Space	enzyme	-0.546881	0.0602207	X	-1.18469	0.00139274	2
PGRMC1	0.664615	10.0887	3.96318	0.000739033	0.0135537	-0.854822	1	0.161516	10.0887	0.963142	0.346719	0.746091	-6.59664	0	ILMN_1684771	PGRMC1	ILMN_165237	10857	6857798	NM_006667.2	NP_006658.1	2970521	S	1499	GGTGTTTGCTCTCCTAAGAGCCTTCATGCACACCCCTGAACCACGAGGAA	+	118262092-118262141	0	0	0	PGRMC1	progesterone receptor membrane component 1	Plasma Membrane	transmembrane receptor	0.817521	0.00136245	2	-0.175446	0.35371	X
PIM3	1.27595	8.96579	9.89448	3.01261e-09	7.86456e-07	11.4373	1	-0.0987881	8.96579	-0.76606	0.452386	0.816354	-6.76772	0	ILMN_1707748	PIM3	ILMN_38886	415116	113429645	XM_938171.2	XP_943264.2	2190452	A	3221	GCCTGGCGTCTGTCCTGGCCCCGCCTGTCAGAAGATGAACATGTATAGTG			0	0	0	PIM3	pim-3 oncogene	unknown	kinase	1.25688	0.000869622	2	0.0932913	0.763501	X
PPP1CC	-0.842076	10.555	-5.80316	1.0225e-05	0.000463326	3.37807	1	0.329435	10.555	2.2703	0.0341291	0.217551	-4.67731	0	ILMN_1701855	PPP1CC	ILMN_5147	5501	4506006	NM_002710.1	NP_002701.1	2760292	S	2061	ACGAGTGACCGATTATGCTTTCTTTGGCCTACATTCTTTATTCTGCGGTG	-	109642280-109642329	0	1	0	PPP1CC	protein phosphatase 1, catalytic subunit, gamma isozyme	Cytoplasm	phosphatase	-0.827785	0.000779987	2	-0.0273361	0.899755	X
CEP135	0.493647	9.26162	4.99556	6.50915e-05	0.00200796	1.53941	0	0.650484	9.26162	6.5827	1.83511e-06	8.2465e-05	4.97373	1	ILMN_1693766	CEP135	ILMN_4965	9662	61676096	NM_025009.3	NP_079285.2	270022	S	5242	GCCCTTTTTAGTGTGTATTAGGATGTGGGCTGGTTTGCTTTTCTACCACC	+	56593856-56593905	0	0	0	CEP135	centrosomal protein 135kDa	Cytoplasm	other	0.62955	0.002481	X	0.687199	0.00112919	2
CEP192	0.342718	9.51541	2.86918	0.00933947	0.0923389	-3.2991	0	1.03984	9.51541	8.70534	2.55713e-08	2.50588e-06	9.26886	1	ILMN_1703754	CEP192	ILMN_7783	55125	50811888	NM_032142.2	NP_115518.2	4490154	A	6869	CCCAGCATTACATCAACATGCCCGTGCAGTTCAAACCGAAGTCCGCAGGC	+	13114633-13114682	0	0	0	CEP192	centrosomal protein 192kDa	Cytoplasm	other	0.408127	0.0649249	X	0.882673	0.0015814	2
CFD	-0.366631	12.4362	-1.5447	0.137742	0.492266	-5.7125	0	-1.68488	12.4362	-7.0988	6.14274e-07	3.33457e-05	6.07448	1	ILMN_1777190	CFD	ILMN_29029	1675	42544238	NM_001928.2	NP_001919.2	1240152	S	820	GCAACAAAGTCCCGAGCAATGAAGTCATCCACTCCTGCATCTGGTTGGTC	+	814271-814320	0	0	0	CFD	complement factor D (adipsin)	Extracellular Space	peptidase	-0.255375	0.358601	X	-1.3347	0.000543343	2
CFH	0.0441759	7.261	0.443995	0.661705	0.904941	-6.78142	0	0.635009	7.261	6.38224	2.83377e-06	0.000117	4.53687	1	ILMN_1810910	CFH	ILMN_12111	3075	62739187	NM_001014975.1	NP_001014975.1	380424	A	846	GGAGATGCTGTATGCACTGAATCTGGATGGCGTCCGTTGCCTTCATGTGA	+	194915495-194915544	0	0	0	CFH	complement factor H	Extracellular Space	other	0.208657	0.741062	X	2.55646	0.000648223	2
CFH	0.0720093	7.48854	0.844157	0.408341	0.781746	-6.51974	0	0.803478	7.48854	9.41909	6.93767e-09	8.72608e-07	10.5755	1	ILMN_2412192	CFH	ILMN_12111	3075	62739187	NM_001014975.1	NP_001014975.1	3360279	A	1214	GGATCACATTCATTGCACACAAGATGGATGGTCGCCAGCAGTACCATGCC	+	194925315-194925364	0	0	0	CFH	complement factor H	Extracellular Space	other	0.208657	0.741062	X	2.55646	0.000648223	2
CHCHD6	-0.566506	7.94423	-3.36671	0.00299543	0.0394875	-2.21399	0	-1.01247	7.94423	-6.01702	6.33573e-06	0.000223893	3.72843	1	ILMN_1785161	CHCHD6	ILMN_19685	84303	14150133	NM_032343.1	NP_115719.1	450072	S	636	TTGCAGGCCCAGATTCTCCACTGCTACCGAGATCGCCCGCATGAGGTGCT	+	128158980-128159029	0	0	0	CHCHD6	coiled-coil-helix-coiled-coil-helix domain containing 6	unknown	other	-0.73445	0.0337414	X	-1.47459	0.000902553	2
SCAND2	1.16641	7.63023	14.1106	5.18753e-12	5.50352e-09	17.5607	1	0.00574417	7.63023	0.0694897	0.945274	0.988869	-7.06645	0	ILMN_1745917	SCAND2	ILMN_306674	54581	153792488	NR_003654.1		2260296	I	8880	GAACCAGTAGTCCAGGGTGGCTCACAAAGACCACTTTGAGGCTCTTGCTC			0	0	0	SCAND2	SCAN domain containing 2 pseudogene	Nucleus	transcription regulator	1.30231	0.000508032	2	-0.350054	0.143447	X
SCAND2	0.715751	7.31353	6.55551	1.94591e-06	0.000128483	5.02981	1	0.0738909	7.31353	0.676762	0.506135	0.844672	-6.83312	0	ILMN_1775590	SCAND2	ILMN_306674	54581	153792488	NR_003654.1		6020519	I	9720	CTCCCGGACTTCAAGGAGATTCAGAAAACGTCCAGTGCAGGTGGGAAATG			0	0	0	SCAND2	SCAN domain containing 2 pseudogene	Nucleus	transcription regulator	1.30231	0.000508032	2	-0.350054	0.143447	X
CHMP5	0.74222	8.74808	3.03986	0.00635224	0.0700766	-2.93381	0	0.981716	8.74808	4.02074	0.000645085	0.0102981	-0.880617	1	ILMN_2094166	CHMP5	ILMN_21129	51510	20127557	NM_016410.2	NP_057494.2	6450326	S	60	TTTCTTCGCGGCTGCTCAAGATGAACCGACTCTTCGGGAAAGCGAAACCC	+	33255059-33255076:33255077-33255108	0	0	0	CHMP5	charged multivesicular body protein 5	Cytoplasm	other	0.31361	0.0513232	X	0.755937	0.000605786	2
CHMP5	0.553905	9.09445	3.24288	0.00398947	0.049128	-2.48943	0	0.834816	9.09445	4.8875	8.37491e-05	0.00190187	1.14362	1	ILMN_1732534	CHMP5	ILMN_21129	51510	142369570	NM_016410.3	NP_057494.2	7650347	S	600	CTGGCTGATGAAGACAGTTCTTATTTGGATGAGGCAGCATCTGCACCTGC	+	33268137-33268186	0	0	0	CHMP5	charged multivesicular body protein 5	Cytoplasm	other	0.31361	0.0513232	X	0.755937	0.000605786	2
SCARB2	-0.972625	12.375	-9.76952	3.7414e-09	9.26841e-07	11.2248	1	-0.0551362	12.375	-0.553814	0.585707	0.87955	-6.91045	0	ILMN_1814726	SCARB2	ILMN_12802	950	33598925	NM_005506.2	NP_005497.1	4810435	S	4542	GCTCGAGATATGAGTTCTGCAAAAGGTGGTCCGCATCCTTGGCCCTCTGG	-	77299074-77299123	0	0	0	SCARB2	scavenger receptor class B, member 2	Plasma Membrane	other	-0.859715	0.00940519	2	0.231806	0.448544	X
CHPT1	-0.239426	9.2079	-2.5308	0.0196682	0.15449	-3.99539	0	-1.2342	9.2079	-13.0459	2.21591e-11	7.95154e-09	16.2681	1	ILMN_1729112	CHPT1	ILMN_24076	56994	50726995	NM_020244.2	NP_064629.2	2630687	S	989	GGATCCACTATAGCAGGCACCAGTGTCTTGTCACCTGGACTCCACATAGG	+	100638149-100638163:100641077-100641111	0	0	0	CHPT1	choline phosphotransferase 1	unknown	enzyme	-0.581006	0.0113156	X	-1.68755	3.30431e-05	2
SEMA4A	-1.23984	12.0097	-6.82299	1.09766e-06	8.3831e-05	5.59985	1	-0.116719	12.0097	-0.64232	0.527796	0.853569	-6.85628	0	ILMN_1702787	SEMA4A	ILMN_22211	64218	21361913	NM_022367.2	NP_071762.2	2850576	S	2918	TGCCGCTTTGGACACCAACACTCCCTTCTCCCAGGGTCATGCAGGGATCT	+	154413847-154413896	0	0	0	SEMA4A	sema domain, immunoglobulin domain (Ig), transmembrane domain (TM) and short cytoplasmic domain, (semaphorin) 4A	Plasma Membrane	other	-1.15352	0.00343319	2	0.0300255	0.944354	X
SERPINB1	0.643014	10.097	5.42679	2.4035e-05	0.000914227	2.52818	1	0.0965662	10.097	0.814982	0.424466	0.801625	-6.72864	0	ILMN_1679133	SERPINB1	ILMN_10210	1992	20149554	NM_030666.2	NP_109591.1	3190112	S	912	CGCCTAGGTGTGCAGGATCTCTTTAACAGTAGCAAGGCTGATCTGTCTGG	-	2779063-2779112	0	0	0	SERPINB1	serpin peptidase inhibitor, clade B (ovalbumin), member 1	Cytoplasm	other	0.549199	0.0444556	2	-0.0336373	0.927473	X
SERPINH1	0.935614	7.92126	8.28052	5.73287e-08	7.99359e-06	8.53277	1	-0.0880781	7.92126	-0.779523	0.444594	0.812166	-6.75719	0	ILMN_1751028	SERPINH1	ILMN_28241	871	32454740	NM_001235.2	NP_001226.2	7650017	S	1876	GCTGCCTCCCCAGCTCTATCCCAACCTCTCCCAACTATAAAACTAGGTGC	+	74961166-74961215	0	0	0	SERPINH1	serpin peptidase inhibitor, clade H (heat shock protein 47), member 1, (collagen binding protein 1)	Extracellular Space	other	1.41911	0.000126484	2	0.629278	0.00633742	X
SLCO2B1	-1.35796	12.7468	-8.27721	5.76956e-08	8.02182e-06	8.52645	1	0.0122796	12.7468	0.0748481	0.941062	0.987919	-7.06605	0	ILMN_2087656	SLCO2B1	ILMN_1897	11309	41152057	NM_007256.2	NP_009187.1	6580441	S	3781	CTTCTGAGCAGCTCCCAGTGCCAGGGCTTTGAGACTTTCCCACATGATAA	+	74594660-74594709	0	0	0	SLCO2B1	solute carrier organic anion transporter family, member 2B1	Plasma Membrane	transporter	-1.10128	0.00183871	2	-0.0995463	0.753294	X
CISH	0.424516	7.58957	4.2134	0.00040915	0.00856232	-0.27528	0	0.65319	7.58957	6.48303	2.27616e-06	9.73596e-05	4.75716	1	ILMN_1738207	CISH	ILMN_10462	1154	21614506	NM_145071.1	NP_659508.1	4920064	S	1679	CAGAGCCTGTGTCTCACCCCCTCACAGGACAGAGCTGTATCTGCATAGAG	-	50619212-50619261	0	0	0	CISH	cytokine inducible SH2-containing protein	Cytoplasm	other	1.68456	0.00133813	X	1.86129	0.000505561	2
CITED1	0.187274	7.12616	1.60802	0.123151	0.466853	-5.62023	0	0.645019	7.12616	5.5384	1.86251e-05	0.000552884	2.64662	1	ILMN_1691641	CITED1	ILMN_174448	4435	20127458	NM_004143.2	NP_004134.1	5290711	S	707	GCTCCCACTAGTTCCTCGGGATCTCCAATAGGCTCTCCTACAACCACCCC	-	71438652-71438701	0	0	0	CITED1	Cbp/p300-interacting transactivator, with Glu/Asp-rich carboxy-terminal domain, 1	Nucleus	transcription regulator	1.22528	0.0133115	X	2.01308	0.000831724	2
DDEF1	0.803853	8.46383	3.88353	0.000891902	0.0156814	-1.03854	1	0.741491	8.46383	3.58225	0.00181165	0.0236966	-1.8924	1	ILMN_2233366	DDEF1	ILMN_184045	50807	46094080	NM_018482.2	NP_060952.2	940164	S	5552	CCATCAGGAATTTGAGTTCTCTCTAACCCAGCTTACTGTGGGACATAGGA	-	131133975-131134024	0	0	0	ASAP1	ArfGAP with SH3 domain, ankyrin repeat and PH domain 1	Plasma Membrane	other	-	-	-	-	-	-
DDEF1	0.367681	11.4545	2.78099	0.011371	0.106206	-3.48443	0	0.874924	11.4545	6.61756	1.70248e-06	7.77946e-05	5.04916	1	ILMN_1690963	DDEF1	ILMN_184045	50807	46094080	NM_018482.2	NP_060952.2	7000072	S	5189	GCATGAGGAACCAGTTGACATGCTGGGTTGTGACTGGCAGCTTTAGCAGC	-	131134338-131134387	0	0	0	ASAP1	ArfGAP with SH3 domain, ankyrin repeat and PH domain 1	Plasma Membrane	other	-	-	-	-	-	-
CITED2	0.0910973	9.2901	0.659204	0.517114	0.841656	-6.66008	0	1.22812	9.2901	8.88696	1.82368e-08	1.88557e-06	9.60777	1	ILMN_1663092	CITED2	ILMN_21636	10370	51807294	NM_006079.3	NP_006070.2	7550112	S	1613	GTTCTGGATCAGGAAAGTCATACTGTTCACTTTCAAGTTGGCTGTCCCCC	-	139735356-139735405	0	0	0	CITED2	Cbp/p300-interacting transactivator, with Glu/Asp-rich carboxy-terminal domain, 2	Nucleus	transcription regulator	0.334656	0.171618	X	0.956511	0.00198555	2
SNX2	-1.16503	10.8043	-6.85069	1.03502e-06	8.00489e-05	5.65834	1	0.0119658	10.8043	0.0703624	0.944588	0.98876	-7.06639	0	ILMN_1691575	SNX2	ILMN_164977	6643	23111037	NM_003100.2	NP_003091.2	5550736	S	1788	CAAGCTGCATGTCCTGACCCTCTTTGAATTAAGTGGACTGTGGCATGACA	+	122193421-122193470	0	0	0	SNX2	sorting nexin 2	Cytoplasm	transporter	-1.25775	0.000668777	2	-0.276612	0.266646	X
SPAG9	0.81617	8.30576	3.90733	0.000843195	0.0150456	-0.983698	1	0.0850718	8.30576	0.407272	0.688036	0.918674	-6.98294	0	ILMN_1728256	SPAG9	ILMN_19153	9043	27436919	NM_003971.3	NP_003962.3	130164	A	3153	CCTCTTAGACCTTGGACGGCCTCATCATTCCATCCGTTGCATGACTGTGG	-	46414954-46415003	0	0	0	SPAG9	sperm associated antigen 9	Plasma Membrane	other	0.515856	0.0315063	2	-0.125491	0.626451	X
CLCN6	-0.53573	9.19684	-4.83645	9.43656e-05	0.00265431	1.17159	0	-0.690214	9.19684	-6.23109	3.94553e-06	0.00015306	4.20422	1	ILMN_1741594	CLCN6	ILMN_6195	1185	12025672	NM_021737.1	NP_068505.1	2900768	A	3601	GAGAGGCCCAAGGTGGCCTCGCCAGCCCTGCAGTATTGATGTGCAGTATT	+	11825515-11825564	0	0	0	CLCN6	chloride channel 6	Plasma Membrane	ion channel	-0.227331	0.20546	X	-0.232415	0.199068	d
CLCN6	-0.490634	9.08532	-3.53505	0.0020233	0.029196	-1.83509	0	-0.797441	9.08532	-5.74561	1.1641e-05	0.000374	3.11783	1	ILMN_1763036	CLCN6	ILMN_21870	1185	148536839	NM_001286.2	NP_001277.1	3850136	A	5208	GCCCTGGCTTTGGGACCTTGTGCTGAGGGATGATTTGCTCCTGACCTTGA	+	11825352-11825401	0	0	0	CLCN6	chloride channel 6	Plasma Membrane	ion channel	-0.227331	0.20546	X	-0.232415	0.199068	d
TNFSF9	0.655429	7.44864	8.12589	7.73636e-08	1.01492e-05	8.23576	1	-0.11956	7.44864	-1.48228	0.1535	0.52323	-5.98263	0	ILMN_1751464	TNFSF9	ILMN_18030	8744	24119163	NM_003811.2	NP_003802.1	5420441	S	1202	GTGTATTGAGCATCTGTAATGTGCCAGCATTGTGCCCAGGCTAGGGGGCT	+	6486503-6486552	0	1	1	TNFSF9	tumor necrosis factor (ligand) superfamily, member 9	Extracellular Space	cytokine	1.24608	0.00133813	2	0.129717	0.685041	X
TNIP2	0.672335	8.0081	5.19847	4.06489e-05	0.00138144	2.00635	1	-0.0483165	8.0081	-0.373581	0.712558	0.926407	-6.99654	0	ILMN_2168933	TNIP2	ILMN_6730	79155	34147369	NM_024309.2	NP_077285.2	6250129	S	1524	CAGTGAGGCTGGAGGCTGGAGGTGGAGATGGGGTCAGGAACATCTGGCAG	-	2713543-2713592	0	0	0	TNIP2	TNFAIP3 interacting protein 2	Cytoplasm	other	0.738783	0.0347842	2	0.422367	0.20918	X
UGDH	0.6235	7.86087	5.87336	8.73329e-06	0.000410599	3.53499	1	0.0626321	7.86087	0.589993	0.561654	0.868687	-6.88924	0	ILMN_1729563	UGDH	ILMN_3906	7358	63053519	NM_003359.2	NP_003350.1	4780050	S	3066	CCCAGGTCTCATCCTTCAGGAATTTTGCAGTTCAATGAGAAGAGGGAGAC	-	39176843-39176892	0	0	0	UGDH	UDP-glucose 6-dehydrogenase	Nucleus	enzyme	1.09863	0.00330343	2	-0.10066	0.779927	X
VLDLR	0.63993	7.24868	8.51399	3.66794e-08	5.67757e-06	8.97489	1	-0.0208487	7.24868	-0.277383	0.784268	0.947287	-7.02898	0	ILMN_2361862	VLDLR	ILMN_14444	7436	65301163	NM_001018056.1	NP_001018066.1	5390661	A	2960	GAGGTCTAAACAAATAATACCCCCGTCGGAATGGTAACCGAGCCAGCAGC	+	2643893-2643942	0	0	0	VLDLR	very low density lipoprotein receptor	Plasma Membrane	transporter	1.84588	0.00180353	2	0.122062	0.826751	X
CLEC10A	-0.639065	8.08435	-2.53007	0.0196989	0.154657	-3.99683	0	-0.926267	8.08435	-3.66712	0.00148462	0.0201425	-1.69818	1	ILMN_1704797	CLEC10A	ILMN_9747	10462	53832017	NM_182906.2	NP_878910.1	780215	I	666	GCTCCAGGAACACACTACGCAGAAGGCACACCTAGGCCACTGTCCCCACT	-	6920135-6920184	0	0	0	CLEC10A	C-type lectin domain family 10, member A	Plasma Membrane	other	-2.62729	0.00511687	X	-1.36935	0.0781142	1
CLEC10A	-0.682966	8.2142	-2.3642	0.0280506	0.195282	-4.32176	0	-0.989515	8.2142	-3.42538	0.00261344	0.0320134	-2.24864	1	ILMN_1653166	CLEC10A	ILMN_11630	10462	53832015	NM_006344.2	NP_006335.2	1050189	A	1493	ATAGATAACATTGCCATCGCCCCCACCAGTCCCCTCATGCCTCTGGGCAG	-	6918736-6918785	0	0	0	CLEC10A	C-type lectin domain family 10, member A	Plasma Membrane	other	-2.62729	0.00511687	X	-1.36935	0.0781142	1
XPO1	-0.658671	10.0844	-5.21189	3.94079e-05	0.0013496	2.03713	1	0.0848162	10.0844	0.671127	0.509644	0.846031	-6.83699	0	ILMN_1725121	XPO1	ILMN_16600	7514	53759152	NM_003400.3	NP_003391.1	5690333	S	4391	GTGCTGCATTGTCTGAAGTTAGCACCTCTTGGACTGAATCGTTTGTCTAG	-	61558962-61559011	0	0	0	XPO1	exportin 1 (CRM1 homolog, yeast)	Nucleus	transporter	-0.674306	0.00499431	2	-0.245584	0.215781	X
YWHAH	-1.0212	11.7201	-5.46226	2.21611e-05	0.000855621	2.60884	1	0.0715977	11.7201	0.382965	0.705694	0.924346	-6.99287	0	ILMN_1728512	YWHAH	ILMN_27184	7533	61744461	NM_003405.3	NP_003396.1	4810653	S	1655	GGCTATTGTCCTTGTGTATCCTGACAGCGCCATGTGTGTCAGCCCATGTC	+	30683452-30683501	0	0	1	YWHAH	tyrosine 3-monooxygenase/tryptophan 5-monooxygenase activation protein, eta polypeptide	Cytoplasm	transcription regulator	-1.07143	0.00387363	2	-0.131503	0.70506	X
CLEC2D	-0.313855	8.26589	-1.65906	0.112351	0.444963	-5.54376	0	-0.699665	8.26589	-3.69849	0.00137911	0.0190153	-1.62616	1	ILMN_1711702	CLEC2D	ILMN_15059	29121	112382217	NM_013269.3	NP_037401.1	5490341	A	987	CTTGAGACAAGAACAGTATGGGGCTCCCTGGTGTGATTCCGTCCTGCGCG	+	9739126-9739175	0	0	0	CLEC2D	C-type lectin domain family 2, member D	Plasma Membrane	transmembrane receptor	-0.817074	0.00649269	X	-1.20391	0.000633536	2
A4GALT	0.890345	7.86865	6.21185	4.11617e-06	0.0002301	4.28381	1	1.56661	7.86865	10.9301	5.35754e-10	1.08941e-07	13.1279	1	ILMN_1735045	A4GALT	ILMN_25424	53947	55956926	NM_017436.4	NP_059132.1	3610072	S	1993	TCTTTAGGCTCAGGAGAAGCATTTTAAAGAAACCCCCACCCTGCCGCCCG	-	41418120-41418169	0	0	0	A4GALT	alpha 1,4-galactosyltransferase	Cytoplasm	enzyme	0.530459	0.00964341	2	0.756019	0.00124782	2
ABCA1	0.923895	12.7141	4.54442	0.000187322	0.00457313	0.493951	1	0.490588	12.7141	2.41309	0.0252984	0.177285	-4.40324	0	ILMN_1766054	ABCA1	ILMN_21049	19	21536375	NM_005502.2	NP_005493.2	4060358	S	10145	GTGCTCTTTGTTCATCATTGGCCCTCATTCCAAGCACTTTACGCTGTCTG	-	106583321-106583370	0	0	0	ABCA1	ATP-binding cassette, sub-family A (ABC1), member 1	Plasma Membrane	transporter	0.967428	0.0062475	2	0.455034	0.126074	X
ABCC1	1.00643	8.82976	4.14031	0.0004863	0.00978925	-0.444862	1	0.619088	8.82976	2.54684	0.0189989	0.14519	-4.13823	0	ILMN_1802404	ABCC1	ILMN_12532	4363	134142334	NM_019900.2	NP_063955.2	1500187	A	5192	ACCAGCATCTCAGCGCCAGCTCTACCAGTTCTCGTTTTGGGCCAGAGGCA	+	16143255-16143304	0	1	0	ABCC1	ATP-binding cassette, sub-family C (CFTR/MRP), member 1	Plasma Membrane	transporter	0.564792	0.0378587	2	0.705162	0.0132087	X
ABCC5	-1.38113	10.404	-5.60868	1.58725e-05	0.000655894	2.94063	1	-2.17561	10.404	-8.835	2.00799e-08	2.03729e-06	9.51126	1	ILMN_1706531	ABCC5	ILMN_25223	10057	66529004	NM_005688.2	NP_005679.2	6580553	I	5646	GTTTGGTGTGTTCCCGCAAACCCCCTTTGTGCTGTGGGGCTGGTAGCTCA	-	185120565-185120614	0	0	0	ABCC5	ATP-binding cassette, sub-family C (CFTR/MRP), member 5	Plasma Membrane	transporter	-1.11462	0.00193227	2	-2.14831	3.95434e-05	2
CLIP1	0.155014	8.88163	1.29798	0.208732	0.601005	-6.04328	0	0.950033	8.88163	7.95493	1.08157e-07	8.0217e-06	7.82096	1	ILMN_2404085	CLIP1	ILMN_179647	6249	38016917	NM_002956.2	NP_002947.1	2260066	A	5692	GCCTTTGATGTATTTTCCCCTCAAGATTATCAACTGTGTGTTCGACAGTG	-	121322072-121322121	0	0	0	CLIP1	CAP-GLY domain containing linker protein 1	Cytoplasm	other	0.285049	0.101161	X	0.551992	0.00588649	2
ABCC5	-0.823201	9.58104	-5.57602	1.7096e-05	0.000696716	2.8668	1	-1.71664	9.58104	-11.6278	1.78618e-10	4.40247e-08	14.2158	1	ILMN_1651964	ABCC5	ILMN_438	10057	66529092	NM_001023587.1	NP_001018881.1	7610050	I	1804	CCGTCGGAGACCAGATGACCTGTTAGATGGCTAGTCCTGTATAACTCGAC	-	185184354-185184403	0	0	0	ABCC5	ATP-binding cassette, sub-family C (CFTR/MRP), member 5	Plasma Membrane	transporter	-1.11462	0.00193227	2	-2.14831	3.95434e-05	2
CLN3	-0.252559	8.92005	-2.09977	0.0483389	0.277012	-4.81301	0	-0.702534	8.92005	-5.84086	9.39407e-06	0.000314437	3.33301	1	ILMN_1669281	CLN3	ILMN_169963	1201	109698600	NM_001042432.1	NP_001035897.1	520630	S	1629	GGGCTCCTGGCTTTGCCTCTGCATGACTTCCTCTGCCAGCTCTCCTGATA	-	28396335-28396337:28396338-28396384	0	0	0	CLN3 (includes EG:1201)	ceroid-lipofuscinosis, neuronal 3	Cytoplasm	other	-0.383642	0.0752422	X	-0.702245	0.00495963	2
CLN3	-0.213506	8.79862	-1.88529	0.0736687	0.354293	-5.18368	0	-0.68336	8.79862	-6.03417	6.09865e-06	0.000218041	3.76673	1	ILMN_2394381	CLN3	ILMN_24228	1201	109698602	NM_000086.2	NP_000077.1	6580682	A	1683	AGAGGGACAGGTCAGACACCCAGGCCCACCCCAGAGACCCTCCATGAACT	-	28396245-28396294	0	0	0	CLN3 (includes EG:1201)	ceroid-lipofuscinosis, neuronal 3	Cytoplasm	other	-0.383642	0.0752422	X	-0.702245	0.00495963	2
CLN8	-0.57104	9.29221	-1.94397	0.0657756	0.331815	-5.08495	0	-1.0819	9.29221	-3.68306	0.00143003	0.0195431	-1.66159	1	ILMN_1701094	CLN8	ILMN_21198	2055	148277059	NM_018941.3	NP_061764.2	290661	S	4529	GTCGTGGTTCAGGCAGTATGGGCCGCTGTGACAAAACACCTAAGACTGGG	+	1719503-1719552	0	0	0	CLN8	ceroid-lipofuscinosis, neuronal 8 (epilepsy, progressive with mental retardation)	Cytoplasm	other	-0.649146	0.0222791	X	-0.721545	0.012368	2
dJ341D10.1	0.595699	8.60952	4.3789	0.000276758	0.00625874	0.109203	1	0.527612	8.60952	3.8784	0.000902764	0.0134689	-1.21105	0	ILMN_1790985	dJ341D10.1	ILMN_28389	286453	56090219	NM_001007535.1	NP_001007536.1	7150674	S	1152	TCAGGGTCTTCCCATGGTGGTTCAGAATAGATGAGCATAGCAAGGTTTTG	+	100100006-100100055	0	0	0	dJ341D10.1	chondroitin sulfate N-acetylgalactosaminyltransferase 2 pseudogene	unknown	other	-	-	-	-	-	-
CLN8	-0.519075	8.38318	-3.18139	0.00459618	0.0548015	-2.62505	0	-0.742226	8.38318	-4.54907	0.000185282	0.00367715	0.353393	1	ILMN_1684576	CLN8	ILMN_21198	2055	148277059	NM_018941.3	NP_061764.2	5130066	S	6737	CTGTGCAGAACCCAGCACACGTGATTTTGTGTGACATGCCAGCAGCCTGG	+	1721711-1721760	0	0	0	CLN8	ceroid-lipofuscinosis, neuronal 8 (epilepsy, progressive with mental retardation)	Cytoplasm	other	-0.649146	0.0222791	X	-0.721545	0.012368	2
DKFZp686O24166	0.700425	8.62791	4.50898	0.000203634	0.00490028	0.411578	1	-0.383733	8.62791	-2.47028	0.0223976	0.163093	-4.29086	0	ILMN_1669972	DKFZp686O24166	ILMN_19977	374383	57863760	NM_001009913.1	NP_001009913.1	5670187	S	6060	CAACACATAGGCCTTCCCAGACATGCACCCTCATGGGATTCCAGACCCCC	+	17355122-17355171	0	0	0	B7H6	B7 homolog 6	unknown	other	-	-	-	-	-	-
CLNS1A	-0.277631	9.95058	-2.25566	0.035179	0.226014	-4.52763	0	-0.70517	9.95058	-5.72929	1.20779e-05	0.000385497	3.08088	1	ILMN_1736814	CLNS1A	ILMN_164976	1207	4502890	NM_001293.1	NP_001284.1	1070639	S	1057	CTGTGTCTGGGTACCCTCTGAGTAGGCCTATAATTCCTACCTTGACTGTG	-	77005106-77005155	0	0	0	CLNS1A	chloride channel, nucleotide-sensitive, 1A	Plasma Membrane	ion channel	-0.538157	0.0359639	X	-0.796945	0.00519515	2
CLYBL	-0.253272	7.87576	-2.92646	0.00821154	0.0844551	-3.17745	0	-0.850431	7.87576	-9.82641	3.38923e-09	4.83629e-07	11.2914	1	ILMN_1663538	CLYBL	ILMN_27821	171425	45545436	NM_206808.1	NP_996531.1	2070044	I	1067	AGGGTATTGAAGCTGCAGAGGGATCAACTTGTGCTTGCCAGAGGACGCCA	+	99342703-99342752	0	0	0	CLYBL	citrate lyase beta like	Cytoplasm	enzyme	-0.325311	0.238374	X	-1.20312	0.00104066	2
CLYBL	-0.185589	7.68631	-1.77039	0.0915584	0.39902	-5.37076	0	-0.666851	7.68631	-6.36131	2.96611e-06	0.000121743	4.49099	1	ILMN_1712088	CLYBL	ILMN_27821	171425	45545436	NM_206808.1	NP_996531.1	4610273	A	970	TCGACATGCCATTACTGAAGCAGGCCCAGAACACTGTTACGCTTGCCACC	+	99341601-99341650	0	0	0	CLYBL	citrate lyase beta like	Cytoplasm	enzyme	-0.325311	0.238374	X	-1.20312	0.00104066	2
CMBL	-0.133583	7.52145	-1.48487	0.152818	0.517421	-5.79699	0	-0.861916	7.52145	-9.58082	5.20772e-09	6.8136e-07	10.8623	1	ILMN_1709634	CMBL	ILMN_1485	134147	93277097	NM_138809.3	NP_620164.1	5810564	S	2113	GGACCAGCTGACAGGTCAAGTGTGGCCTTTTCTGGTCTTTGAACACATCA	-	10332591-10332640	0	0	0	CMBL	carboxymethylenebutenolidase homolog (Pseudomonas)	unknown	enzyme	-0.00203465	0.996566	X	-2.3482	9.8769e-05	2
CMIP	-0.213919	12.1	-2.00503	0.0583665	0.309183	-4.98004	0	0.727416	12.1	6.81797	1.1094e-06	5.46329e-05	5.47988	1	ILMN_1738075	CMIP	ILMN_13851	80790	29789254	NM_030629.1	NP_085132.1	360626	A	3880	TCTTTCCCCCCTCCGGTCCCATACTTCACAGCACTCTGGTGCGGGAAGAA	+	80302617-80302666	0	0	0	CMIP	c-Maf inducing protein	Cytoplasm	other	-0.461277	0.0215203	X	0.62511	0.00432949	2
ABCE1	-1.06788	8.63112	-5.4429	2.31648e-05	0.000886657	2.56482	1	-0.615784	8.63112	-3.13861	0.0050701	0.0536145	-2.88817	0	ILMN_2330267	ABCE1	ILMN_180762	6059	108773783	NM_001040876.1	NP_001035809.1	1090543	A	3293	GAGTTCCTGAATTTTGAACAGGATTACCTGGAGCCTGGAGCCACTTTAAG	+	146269228-146269277	0	0	0	ABCE1	ATP-binding cassette, sub-family E (OABP), member 1	Cytoplasm	transporter	-1.52579	0.000728817	2	-0.946805	0.00620395	X
ABCE1	-1.1309	8.41782	-6.50047	2.19178e-06	0.000140741	4.91134	1	-0.426183	8.41782	-2.44973	0.0234021	0.167853	-4.3314	0	ILMN_1676846	ABCE1	ILMN_180762	6059	108773783	NM_001040876.1	NP_001035809.1	5310152	S	3314	GATTACCTGGAGCCTGGAGCCACTTTAAGTTGTACTTCTGACTAAACTGG	+	146269249-146269298	0	0	0	ABCE1	ATP-binding cassette, sub-family E (OABP), member 1	Cytoplasm	transporter	-1.52579	0.000728817	2	-0.946805	0.00620395	X
ABHD10	-0.620702	8.00422	-6.66533	1.53653e-06	0.000107507	5.265	1	-0.406018	8.00422	-4.35997	0.000289405	0.0053156	-0.0889263	0	ILMN_1770031	ABHD10	ILMN_8397	55347	8923000	NM_018394.1	NP_060864.1	1300328	S	2308	CCAGGCAGAGACTACCTTTGTGACCAGCTCCCAGTAAAAACCCCAGGCAC	+	113194635-113194684	0	0	0	ABHD10	abhydrolase domain containing 10	Cytoplasm	other	-1.63041	0.00011631	2	-0.941031	0.00133078	X
ABHD12	-1.3265	8.70564	-10.0396	2.34792e-09	6.78007e-07	11.6815	1	-1.54925	8.70564	-11.7255	1.53764e-10	3.88807e-08	14.3638	1	ILMN_1745116	ABHD12	ILMN_15850	26090	109689721	NM_015600.3	NP_056415.1	2710615	S	1346	TGGTGTGACTGAAGCCAACAGGTGACACGGTCATCGAAGAGCAGCAGACA	-	25223566-25223608:25223609-25223615	0	0	0	ABHD12	abhydrolase domain containing 12	unknown	other	-2.04896	6.73744e-05	2	-1.81309	6.97447e-05	2
ABHD12	-1.16701	9.95499	-4.62773	0.000153972	0.0039081	0.687505	1	-1.48692	9.95499	-5.89631	8.29546e-06	0.000284895	3.45784	1	ILMN_2318685	ABHD12	ILMN_182545	26090	109689717	NM_001042472.1	NP_001035937.1	7100615	A	1238	ACCTTGGCTACAGGCACAAATACATTTACAAGAGCCCTGAGCTGCCACGG	-	25230862-25230911	0	0	0	ABHD12	abhydrolase domain containing 12	unknown	other	-2.04896	6.73744e-05	2	-1.81309	6.97447e-05	2
ABHD12	-1.47403	10.8883	-9.05911	1.32886e-08	2.49428e-06	9.97783	1	-1.81592	10.8883	-11.1603	3.70781e-10	8.25824e-08	13.493	1	ILMN_2245305	ABHD12	ILMN_182545	26090	109689717	NM_001042472.1	NP_001035937.1	7610382	I	1677	TCTTGGGGCTCGGGACCATGCTGAGCTTTTTGGCACCACCCACAGAGAAC	-	25229089-25229138	0	0	0	ABHD12	abhydrolase domain containing 12	unknown	other	-2.04896	6.73744e-05	2	-1.81309	6.97447e-05	2
CNIH4	0.40339	8.50537	2.28404	0.0331701	0.217495	-4.47436	0	0.75331	8.50537	4.26532	0.00036191	0.00638538	-0.310208	1	ILMN_1714759	CNIH4	ILMN_9903	29097	142370068	NM_014184.2	NP_054903.1	6400332	S	493	GCACAGTTGAGGAGCCAGAGACTTCTTAAATCATCCTTAGAACCGTGACC	+	222630188-222630237	0	0	0	CNIH4	cornichon homolog 4 (Drosophila)	Plasma Membrane	other	0.716693	0.0286834	X	0.812932	0.0147727	2
ABI3	-1.10467	8.96444	-9.58367	5.1816e-09	1.21573e-06	10.905	1	-1.00845	8.96444	-8.74897	2.35682e-08	2.34729e-06	9.35066	1	ILMN_1755658	ABI3	ILMN_15857	51225	29337288	NM_016428.2	NP_057512.1	3840717	S	1894	TGTCCTGTGACTGCCCCACAGAGATAAGGGGCCAGGAGGGATTGAAAGGC	+	44655371-44655420	0	0	0	ABI3	ABI family, member 3	Plasma Membrane	other	-2.04615	9.02685e-05	2	-1.17152	0.00100867	2
ABL2	0.604002	7.46158	6.74803	1.28749e-06	9.42009e-05	5.44105	1	0.105983	7.46158	1.18406	0.249959	0.655339	-6.36302	0	ILMN_1741628	ABL2	ILMN_8230	27	153266755	NM_007314.2	NP_009298.1	1990288	A	3568	CACTGGACACCAGCTGCTTGACTACTGCTCAGGCTATGTGGACTGCATCC	-	177343642-177343691	0	0	0	ABL2	v-abl Abelson murine leukemia viral oncogene homolog 2	Cytoplasm	kinase	1.40923	0.000286385	2	0.732924	0.00603334	X
ABL2	1.23408	8.34429	7.70162	1.78972e-07	1.96716e-05	7.40353	1	0.702668	8.34429	4.38518	0.000272684	0.00505894	-0.0299668	1	ILMN_1657870	ABL2	ILMN_1881	27	153266756	NM_005158.3	NP_005149.3	2510520	I	91	CACTTTGCTGCCTGTGCACTGAGGCCTCAGAATCTGCTCTACCCGACTTA	-	177378694-177378743	0	0	0	ABL2	v-abl Abelson murine leukemia viral oncogene homolog 2	Cytoplasm	kinase	1.40923	0.000286385	2	0.732924	0.00603334	2
COL13A1	0.162073	7.41777	0.991606	0.33297	0.724426	-6.38489	0	2.64333	7.41777	16.1726	3.96563e-13	3.51874e-10	20.1533	1	ILMN_2370624	COL13A1	ILMN_507	1305	22027588	NM_080805.2	NP_542995.2	3870228	A	2876	AAATTATTGTGTCCTGGTGCCAAAGGGGGCCAGCCAGAACTGAGGTGCTG	+	71388736-71388785	0	0	0	COL13A1	collagen, type XIII, alpha 1	Plasma Membrane	other	0.941337	0.0838054	X	5.39944	1.46147e-05	2
COL2A1	0.0361842	7.23497	0.338222	0.738641	0.931636	-6.82403	0	1.69239	7.23497	15.8192	6.03638e-13	4.67599e-10	19.7528	1	ILMN_1674785	COL2A1	ILMN_8700	1280	15149477	NM_001844.3	NP_001835.2	4010136	A	4722	GACCTGATGTCCATTCATCCCACCCTCTCACAGTTCGGACTTTTCTCCCC	-	46653306-46653355	0	0	0	COL2A1 (includes EG:1280)	collagen, type II, alpha 1	Extracellular Space	other	0.14515	0.740282	X	5.12137	2.83683e-06	2
COL7A1	0.306869	7.66962	2.14136	0.04445	0.263226	-4.73813	0	0.886843	7.66962	6.18846	4.33387e-06	0.000165365	4.10989	1	ILMN_1751161	COL7A1	ILMN_24830	1294	17738300	NM_000094.2	NP_000085.1	2490593	S	9046	TGCACGTCCGTTATTTCAGTGACTTGGTCCCGTGGGTCTAGCCTTCCCCC	-	48576675-48576724	0	0	0	COL7A1	collagen, type VII, alpha 1	Extracellular Space	other	0.533595	0.233531	X	1.65719	0.0026265	2
COMMD4	-0.387919	9.75251	-3.35873	0.0030514	0.0400392	-2.23182	0	-0.627522	9.75251	-5.43329	2.36801e-05	0.00067502	2.40607	1	ILMN_2096654	COMMD4	ILMN_33223	54939	88703049	NM_017828.3	NP_060298.2	2370093	S	678	TGTGTGGAGCCGCCCTGCCCGTATGGAGTCACGCCCTCTGAACTGCTCTT	+	73419420-73419469	0	0	0	COMMD4	COMM domain containing 4	Cytoplasm	other	-0.38924	0.104643	X	-0.586119	0.0214077	2
COMMD6	-0.353622	10.5537	-3.07361	0.00588229	0.0661142	-2.86064	0	-0.822824	10.5537	-7.1518	5.50073e-07	3.04016e-05	6.18552	1	ILMN_1777378	COMMD6	ILMN_12073	170622	115345343	NM_203497.2	NP_987093.1	4260484	A	65	CGAGCCGCCGCTGGATGCTAAGTCCGATGTCACCAACCAGCTTGTAGATT	-	75002393-75002403:75009801-75009812:75009901-75009927	0	0	0	COMMD6	COMM domain containing 6	unknown	other	-0.381858	0.0556067	X	-0.684844	0.0035233	2
ABL2	0.819899	7.97141	7.38993	3.36554e-07	3.15856e-05	6.77599	1	0.348185	7.97141	3.13827	0.00507409	0.0536451	-2.88892	0	ILMN_2240003	ABL2	ILMN_8230	27	6382061	NM_007314.1	NP_009298.1	4670717	I	365	ACTTTGCCAGCTGTGTGGAGGATGGATTTGAGGGAGACAAGACTGGAGGC	-	177369079-177369128	0	0	0	ABL2	v-abl Abelson murine leukemia viral oncogene homolog 2	Cytoplasm	kinase	1.40923	0.000286385	2	0.732924	0.00603334	X
ABTB2	1.44639	7.418	11.3002	2.97311e-10	1.42249e-07	13.6946	1	1.27919	7.418	9.99389	2.53899e-09	3.87162e-07	11.5796	1	ILMN_1753370	ABTB2	ILMN_22109	25841	21956638	NM_145804.1	NP_665803.1	940148	S	3752	AAGAGGCCTTTCTGCTGTGTCCCCTCACGGCCTTGCCCTCGAATTCTGCA	-	34129458-34129507	0	0	0	ABTB2	ankyrin repeat and BTB (POZ) domain containing 2	unknown	other	1.64946	0.000182821	2	1.64714	0.000114387	2
COQ10B	0.42687	10.1363	3.34503	0.00314994	0.0409492	-2.26241	0	0.604586	10.1363	4.73765	0.00011894	0.00255255	0.794142	1	ILMN_1751615	COQ10B	ILMN_29987	80219	142365652	NM_025147.3	NP_079423.1	6380021	S	1703	AGCTACTTTTCCAGTAGTTTGCCACTTTCTCCGAGGTAGTTTGGCTGCTC	+	198047825-198047874	0	0	0	COQ10B	coenzyme Q10 homolog B (S. cerevisiae)	Cytoplasm	other	0.621299	0.00338663	X	0.792959	0.000659106	2
CORO1B	-0.416621	8.69201	-2.84296	0.00990401	0.0960715	-3.35445	0	-0.643234	8.69201	-4.38934	0.000270022	0.00501622	-0.0202462	1	ILMN_2377019	CORO1B	ILMN_26478	57175	65787330	NM_020441.2	NP_065174.1	3780451	A	1465	AAGCTGGAGGAGGTGATGCAGGAGCTGCGGGCCCTGAGGGCGCTGGTCAA	-	66962489-66962538	0	0	0	CORO1B (includes EG:23789)	coronin, actin binding protein, 1B	Cytoplasm	other	-0.621885	0.0267933	X	-0.380246	0.149727	d
DRAM	0.274244	11.0733	1.61553	0.121508	0.463486	-5.60909	0	0.935212	11.0733	5.5092	1.99076e-05	0.000583852	2.5799	1	ILMN_1669376	DRAM	ILMN_20048	55332	110825977	NM_018370.2	NP_060840.2	4280482	S	3215	CTTCTGCCTCACTTCGAGCAGACTTTTGTTCTCGGCGCTCCTCACGATGG	+	100841204-100841253	0	1	0	DRAM1	DNA-damage regulated autophagy modulator 1	unknown	other	-	-	-	-	-	-
ACAT2	0.828215	8.81423	5.50934	1.99012e-05	0.000785139	2.71575	1	-0.215481	8.81423	-1.4334	0.166846	0.545045	-6.04982	0	ILMN_1708672	ACAT2	ILMN_13138	39	148539871	NM_005891.2	NP_005882.2	7330753	S	955	CACCTTTAGCACGGATAGTTTCCTGGTCCCAAGTGGGTGTGGAGCCTTCC	+	160118390-160118439	0	0	0	ACAT2	acetyl-CoA acetyltransferase 2	Cytoplasm	enzyme	0.559727	0.00790405	2	-0.503905	0.0113094	X
ACOX3	0.596778	8.90714	4.65187	0.000145479	0.00374062	0.743548	1	-0.218209	8.90714	-1.70094	0.104101	0.430116	-5.66056	0	ILMN_1743396	ACOX3	ILMN_4422	8310	4501870	NM_003501.1	NP_003492.1	4540010	S	2284	GCACCTGTGCGCCTAAACTGCTGATTGGCCTCAACTTGCCCAGGCGGACG	-	8419425-8419474	0	0	0	ACOX3	acyl-CoA oxidase 3, pristanoyl	Cytoplasm	enzyme	0.988646	0.00940512	2	-0.235293	0.512777	X
CORO2A	-0.320769	8.03753	-2.40269	0.025862	0.185091	-4.24744	0	-0.60201	8.03753	-4.5093	0.000203479	0.00398483	0.260371	1	ILMN_1813746	CORO2A	ILMN_26347	7464	16554582	NM_003389.2	NP_003380.2	1410609	A	1976	CGCTGAAAGAGATTCCAGTGGGACATGGTGCCGTTTTTCTGTTTGCCTTC	-	99926695-99926744	0	0	1	CORO2A	coronin, actin binding protein, 2A	Cytoplasm	other	-0.340759	0.473942	X	-0.682863	0.132793	1
CORO7	-0.55521	9.91716	-2.04987	0.0534095	0.293752	-4.90162	0	-1.12751	9.91716	-4.16284	0.000461079	0.0077914	-0.549511	1	ILMN_1795949	CORO7	ILMN_42145	79585	88702974	NM_024535.2	NP_078811.2	3360167	S	3181	CAGGATCTTTGGTCACCCCACGCTGCCCCATCTTGCCTGCTGTTCCAGTT	-	4344759-4344808	0	0	0	CORO7	coronin 7	Cytoplasm	other	-0.423102	0.0424365	X	-0.353137	0.0825331	d
ACP2	-0.594295	10.62	-5.14704	4.57861e-05	0.00151663	1.88827	1	0.764205	10.62	6.61858	1.69873e-06	7.76957e-05	5.05138	1	ILMN_2104830	ACP2	ILMN_3044	53	4557009	NM_001610.1	NP_001601.1	2480025	S	1866	GTCACCCCTTCAACTGGAGCAGGACGGAAGGTTGTCTGTACTTGGGAGGG	-	47217622-47217671	0	0	0	ACP2	acid phosphatase 2, lysosomal	Cytoplasm	phosphatase	-0.445748	0.039602	2	0.900392	0.00109971	2
COX19	-0.321943	9.73074	-1.88094	0.0742854	0.355838	-5.19091	0	-0.719839	9.73074	-4.20564	0.000416721	0.00717855	-0.449609	1	ILMN_1656656	COX19	ILMN_15655	90639	110349770	NM_001031617.2	NP_001026788.1	1450255	S	3531	GCTCTCCAGCCTGAGCAACAGAGCCGGACCCTGTCTCACCAAAGGAAAAA	-	972322-972371	0	0	0	COX19 (includes EG:100004173)	COX19 cytochrome c oxidase assembly homolog (S. cerevisiae)	Cytoplasm	other	-0.12085	0.639549	X	-0.564196	0.0210173	2
CPAMD8	0.00286077	7.33084	0.0288649	0.977252	0.99502	-6.88281	0	0.646574	7.33084	6.52386	2.0836e-06	9.05466e-05	4.84603	1	ILMN_1726250	CPAMD8	ILMN_181794	27151	118600976	NM_015692.2	NP_056507.2	4900551	S	5769	CCAGCCTTTCAGAGTGGTGGGGAGGAGGGTTTATGGATGTCAAACACCTG	-	16864931-16864980	0	0	0	CPAMD8	C3 and PZP-like, alpha-2-macroglobulin domain containing 8	unknown	other	0.410704	0.134714	X	1.71756	0.000155769	2
ACP5	-1.51315	12.0953	-5.13739	4.68213e-05	0.00154007	1.86608	1	-1.43791	12.0953	-4.88193	8.48451e-05	0.00192229	1.13066	1	ILMN_2078599	ACP5	ILMN_20083	54	6138970	NM_001611.2	NP_001602.1	7050082	S	1124	CCGGGACCCTGCTCACAGGCAGGCTTTTCCTCCAACCTGTGGCGCTGCAG	-	11546718-11546767	0	0	0	ACP5	acid phosphatase 5, tartrate resistant	Cytoplasm	phosphatase	-1.56004	0.0165833	2	-1.11565	0.063159	1
ACPL2	0.759826	7.4597	6.99142	7.69118e-07	6.28718e-05	5.95387	1	0.312055	7.4597	2.87132	0.00929487	0.0861882	-3.46654	0	ILMN_1706598	ACPL2	ILMN_138667	92370	42476016	NM_152282.2	NP_689495.1	3800538	S	2337	GACTTGGCCCCTGGGCTGTAGTTTGCTGACCCCTCATCTAAAAAATAGGC	+	142495353-142495402	0	0	0	ACPL2	acid phosphatase-like 2	unknown	phosphatase	0.823471	0.025585	2	0.912148	0.014662	X
DTX2	0.490005	11.2639	2.9938	0.0070525	0.0755103	-3.0332	0	1.00663	11.2639	6.15023	4.7154e-06	0.000177016	4.02512	1	ILMN_2275098	DTX2	ILMN_21612	113878	24308252	NM_020892.1	NP_065943.1	6350600	I	2694	CAGCCTGGACGGGCGTGGGTTCTGGGTCAGCTTCTTTTACCTCAATTTTG	+	75973169-75973218	0	0	0	DTX2	deltex homolog 2 (Drosophila)	Nucleus	other	-	-	-	-	-	-
ACPL2	0.768745	7.48084	6.6495	1.58959e-06	0.00010988	5.23119	1	0.379143	7.48084	3.27951	0.00366595	0.0418591	-2.57606	0	ILMN_2306955	ACPL2	ILMN_7605	92370	81295419	NM_152282.3	NP_689495.1	5720537	A	2350	GGTGACCAGATTTGGCCCCTGGGCTGTAGTTTGCTGACCCCTCATCTAAA	+	142495345-142495394	0	0	0	ACPL2	acid phosphatase-like 2	unknown	phosphatase	0.823471	0.025585	2	0.912148	0.014662	X
ACSL1	0.690685	8.68576	3.75001	0.00122171	0.0200343	-1.34531	1	0.619094	8.68576	3.36132	0.00303314	0.0361208	-2.39293	1	ILMN_1684585	ACSL1	ILMN_12367	2180	40807490	NM_001995.2	NP_001986.2	1030431	S	3553	GGGGTCTGTGAGAGTACATGTATTATATACAAGCACAACAGGGCTTGCAC	-	185913945-185913994	0	0	0	ACSL1	acyl-CoA synthetase long-chain family member 1	Cytoplasm	enzyme	0.960148	0.0155828	2	0.785403	0.0347722	2
CPVL	-0.274864	12.4523	-1.14561	0.265176	0.664799	-6.22322	0	-1.93661	12.4523	-8.07163	8.60083e-08	6.78594e-06	8.0512	1	ILMN_2400759	CPVL	ILMN_18740	54504	83641873	NM_031311.3	NP_112601.3	60136	A	1390	CTGACAGTGAAGTGGCTGGTTACATCCGGCAAGCGGGTGACTTCCATCAG	-	29002023-29002023:29036718-29036766	0	0	0	CPVL	carboxypeptidase, vitellogenic-like	unknown	peptidase	-0.402545	0.476107	X	-2.28475	0.00119793	2
CPVL	-0.278787	11.079	-1.12805	0.272352	0.672449	-6.2427	0	-2.12383	11.079	-8.59357	3.15511e-08	2.98402e-06	9.05807	1	ILMN_1682928	CPVL	ILMN_19239	54504	83641875	NM_019029.2	NP_061902.2	1400703	A	1401	CTCCTTGATGGGCATGGACTGGAAAGGATCCCAGGAATACAAGAAGGCAG	-	29036794-29036843	0	0	0	CPVL	carboxypeptidase, vitellogenic-like	unknown	peptidase	-0.402545	0.476107	X	-2.28475	0.00119793	2
ACSL4	0.679688	9.19614	6.4268	2.57171e-06	0.000159878	4.75216	1	1.33196	9.19614	12.5944	4.22108e-11	1.35525e-08	15.6367	1	ILMN_1683598	ACSL4	ILMN_12915	2182	4758331	NM_004458.1	NP_004449.1	7000307	A	4564	GTCAAACACTTGTGACTTTTGCTTTAATTCCATGAATGTTCCTGCCTCCT	-	108771629-108771678	0	0	0	ACSL4	acyl-CoA synthetase long-chain family member 4	Cytoplasm	enzyme	0.79332	0.0176665	2	1.12826	0.00264699	2
CREB3L2	-0.254138	10.0333	-2.71375	0.0131958	0.117773	-3.62399	0	-0.977218	10.0333	-10.435	1.20508e-09	2.16085e-07	12.3222	1	ILMN_1751097	CREB3L2	ILMN_180156	64764	56550066	NM_194071.2	NP_919047.2	20110	S	6955	AACCAGGGGTTTTAGCTCTGTTCTCTGCTCCCATCCTTCGCTCACCAGCT	-	137210715-137210764	0	0	0	CREB3L2	cAMP responsive element binding protein 3-like 2	Nucleus	other	-0.286442	0.199777	X	-0.726726	0.00520729	2
CREG1	0.565577	12.7254	3.84651	0.000973294	0.0167249	-1.12377	0	-0.589725	12.7254	-4.01074	0.000660512	0.0104725	-0.903885	1	ILMN_1680624	CREG1	ILMN_11645	8804	53759126	NM_003851.2	NP_003842.1	1090497	S	1571	CCAGCTTCAGCCAGGGACAAAATCCCCTCCCAAACCACTCTCCACAGCTT	-	165777279-165777328	0	0	0	CREG1	cellular repressor of E1A-stimulated genes 1	Nucleus	transcription regulator	0.344992	0.0677784	X	-0.401361	0.0371176	2
ACTR5	-0.792304	8.3284	-9.47544	6.27565e-09	1.41394e-06	10.7167	1	-0.263125	8.3284	-3.1468	0.00497583	0.0528682	-2.87015	0	ILMN_1652594	ACTR5	ILMN_21862	79913	151301040	NM_024855.3	NP_079131.3	2690670	S	2028	CGGTTCACTTGGGGGCTTCTGTGGTAGAGACTAACTGGCCTTCTGATGTC	+	36834052-36834101	0	0	0	ACTR5	ARP5 actin-related protein 5 homolog (yeast)	unknown	other	-1.1658	0.00199391	2	-0.661182	0.0263502	X
ADAP2	-1.17823	11.7668	-5.10575	5.03848e-05	0.00163272	1.79332	1	-0.146562	11.7668	-0.635114	0.532391	0.855488	-6.86098	0	ILMN_1763000	ADAP2	ILMN_26473	55803	93102369	NM_018404.2	NP_060874.1	3990433	S	2626	GCTGGGTTGTGCATTAAGGGCCAGTTTACTTGTCTGCCTCTTTGACCACC	+	26310214-26310263	0	0	0	ADAP2	ArfGAP with dual PH domains 2	Cytoplasm	other	-1.82349	1.52673e-05	2	-0.68731	0.0013724	X
ADCY7	-0.954156	9.09722	-7.1663	5.33744e-07	4.56978e-05	6.31737	1	-0.703804	9.09722	-5.28601	3.32129e-05	0.000888141	2.06744	1	ILMN_1655935	ADCY7	ILMN_24596	113	115298680	NM_001114.3	NP_001105.1	50735	S	5392	CCCGGCGGGGGCTCTCCTGGCAAGTCAGGAAGGTTTCTGTTGCTAATATA	+	48908798-48908847	0	0	0	ADCY7	adenylate cyclase 7	Plasma Membrane	enzyme	-1.37188	5.97166e-05	2	-0.62912	0.00212389	2
CSAD	0.266784	8.55693	2.84328	0.0098969	0.0960406	-3.35377	0	1.11814	8.55693	11.9168	1.14967e-10	3.0998e-08	14.6508	1	ILMN_2119692	CSAD	ILMN_27963	51380	41393596	NM_015989.3	NP_057073.3	2810255	S	2172	GCCTTTTTAGGCCACAGTGACCTGCGCAATGTTTATATGCTTTGACCTAC	-	51838137-51838186	0	0	0	CSAD	cysteine sulfinic acid decarboxylase	unknown	enzyme	0.375074	0.199457	X	1.43197	0.000554344	2
CSAD	0.209282	7.98555	1.93593	0.0668111	0.334683	-5.09861	0	0.714553	7.98555	6.60986	1.7309e-06	7.87246e-05	5.03252	1	ILMN_1779515	CSAD	ILMN_27963	51380	41393596	NM_015989.3	NP_057073.3	7330138	S	1802	TCTCTGTCTTGCTGCCGGCCTTGATACCACCCCTCACCCGCAGAGTCACT	-	51838507-51838556	0	0	0	CSAD	cysteine sulfinic acid decarboxylase	unknown	enzyme	0.375074	0.199457	X	1.43197	0.000554344	2
ADM	1.39339	11.9851	5.56306	1.76076e-05	0.000714288	2.83748	1	1.90894	11.9851	7.62138	2.10302e-07	1.40201e-05	7.15252	1	ILMN_1708934	ADM	ILMN_29514	133	4501944	NM_001124.1	NP_001115.1	5670465	S	1295	GTCTCAGCGAGGTGTAAAGTTGTTCGCCGCGTGGAATGTGAGTGTGTTTG	+	10285345-10285394	0	0	0	ADM	adrenomedullin	Extracellular Space	other	1.73173	0.000752434	2	1.83541	0.000346838	2
CSF3R	-0.0243502	7.95279	-0.12021	0.905489	0.97899	-6.87574	0	-1.0321	7.95279	-5.09519	5.16343e-05	0.00127847	1.62631	1	ILMN_2323172	CSF3R	ILMN_9077	1441	27437046	NM_000760.2	NP_000751.1	1400746	A	2261	AAGCTCACAGTGCTGGAGGAGGATGAAAAGAAGCCGGTGCCCTGGGAGTC	-	36704923-36704972	0	0	0	CSF3R	colony stimulating factor 3 receptor (granulocyte)	Plasma Membrane	transmembrane receptor	-0.0955554	0.867765	X	-1.51838	0.00475027	2
CSF3R	-0.277014	10.9964	-0.930086	0.363169	0.749769	-6.44357	0	-2.11064	10.9964	-7.08654	6.30195e-07	3.40208e-05	6.04874	1	ILMN_2371280	CSF3R	ILMN_21047	1441	27437044	NM_172313.1	NP_758519.1	6270114	A	2459	GACCAGATCATGCTCCATCCAGCCCCACCCAATGGCCTTTTGTGCTTGTT	-	36704305-36704354	0	1	0	CSF3R	colony stimulating factor 3 receptor (granulocyte)	Plasma Membrane	transmembrane receptor	-0.0955554	0.867765	X	-1.51838	0.00475027	2
ADORA3	-1.18597	9.33645	-4.00881	0.000663534	0.0124402	-0.74939	1	-1.45542	9.33645	-4.91962	7.76973e-05	0.00178652	1.21842	1	ILMN_1730710	ADORA3	ILMN_180342	140	130978679	NM_000677.3	NP_000668.1	4540255	I	1756	CCTTCAGATTCCCCATCAACAAACACTTGAGGGCCTGTATGCCTGGGCCA	-	111844013-111844062	0	0	0	ADORA3	adenosine A3 receptor	Plasma Membrane	G-protein coupled receptor	-1.29558	0.0109381	2	-1.18916	0.0145303	2
CSNK1E	-0.280947	9.95686	-1.72759	0.0991234	0.41666	-5.43826	0	-1.18225	9.95686	-7.26988	4.3073e-07	2.51141e-05	6.43152	1	ILMN_2415235	CSNK1E	ILMN_175309	1454	40549400	NM_152221.2	NP_689407.1	1230187	A	1482	AAGTGTGCCATTTGACCATCTCGGGAAGTGAGGAGAGCCCCCATTGGACC	-	37019219-37019238:37019239-37019268	0	0	0	CSNK1E	casein kinase 1, epsilon	Cytoplasm	kinase	-0.193391	0.513479	X	-0.888218	0.00567092	2
EBI2	0.296995	11.0193	1.44297	0.16416	0.536414	-5.85457	0	0.909498	11.0193	4.41887	0.000251842	0.00474532	0.0488398	1	ILMN_2168217	EBI2	ILMN_165993	1880	50962860	NM_004951.3	NP_004942.1	4040037	S	1321	CATTGGGCACTTTCCCATCTCCAACTCGGAAGTAAGCCCAAGAGAACAAC	-	98745149-98745198	0	0	0	GPR183	G protein-coupled receptor 183	Plasma Membrane	G-protein coupled receptor	-	-	-	-	-	-
EBI2	0.481815	11.6172	2.56585	0.0182331	0.147415	-3.92522	0	0.936436	11.6172	4.98689	6.64192e-05	0.00156968	1.37489	1	ILMN_1798706	EBI2	ILMN_165993	1880	50962860	NM_004951.3	NP_004942.1	4490520	S	1092	CGGCAAGTCAGTGTATCGATTTCTAGTGCTGTGAAGTCAGCCCCTGAAGA	-	98745378-98745427	0	0	0	GPR183	G protein-coupled receptor 183	Plasma Membrane	G-protein coupled receptor	-	-	-	-	-	-
AGPAT6	1.21899	7.66439	11.8847	1.20679e-10	7.18218e-08	14.5655	1	0.791509	7.66439	7.71689	1.73577e-07	1.19309e-05	7.34548	1	ILMN_1740752	AGPAT6	ILMN_182264	137964	31343375	NM_178819.2	NP_848934.1	4560156	S	2199	CCTGAAGAGGGAGAAGGTGAAGGACACGTTCAAGGAGGAGCAGCAGAAGC	+	41597578-41597627	0	0	0	AGPAT6	1-acylglycerol-3-phosphate O-acyltransferase 6 (lysophosphatidic acid acyltransferase, zeta)	Cytoplasm	enzyme	1.37254	0.000124339	2	0.321027	0.0993586	d
AHCY	-0.758519	10.3171	-8.93082	1.6818e-08	3.01747e-06	9.74546	1	-1.49825	10.3171	-17.6404	7.50933e-14	9.16176e-11	21.725	1	ILMN_1657862	AHCY	ILMN_10724	191	9951914	NM_000687.1	NP_000678.1	3710537	S	1684	GCCTTCACCTGGTCTGTGGACTTATACCTGTGTGCTTGGTTTACAGGTCC	-	32332113-32332162	0	0	0	AHCY	adenosylhomocysteinase	Cytoplasm	enzyme	-0.847919	0.0186126	2	-2.22495	0.000101269	2
AK2	0.762341	7.97543	6.19228	4.29751e-06	0.000237294	4.24088	1	-0.146116	7.97543	-1.18686	0.248878	0.654123	-6.35979	0	ILMN_1670542	AK2	ILMN_1688	204	26665889	NM_001625.2	NP_001616.1	1990491	I	789	CCATCCCTGTGAGGCAATGGGTGGGAATGATAGGACAGGCAAAGAGAAGC	-	33251292-33251341	0	0	0	AK2	adenylate kinase 2	Cytoplasm	kinase	1.36804	0.000237762	2	-0.466911	0.0378707	X
AK2	0.74756	7.94254	8.32965	5.21553e-08	7.37763e-06	8.62644	1	-0.266703	7.94254	-2.97173	0.00741383	0.0724198	-3.2516	0	ILMN_1655645	AK2	ILMN_19751	204	77157796	NM_013411.3	NP_037543.1	3140441	I	3374	AGTGACCAAGATACTCATGTGGGTTGGACTGCCCAGGACACAGCAGATGC	-	33246355-33246404	0	0	0	AK2	adenylate kinase 2	Cytoplasm	kinase	1.36804	0.000237762	2	-0.466911	0.0378707	X
EDG7	0.321224	7.18449	6.65864	1.55874e-06	0.000108361	5.2507	0	1.19583	7.18449	24.7883	9.62598e-17	4.27061e-13	27.7215	1	ILMN_1709719	EDG7	ILMN_18518	23566	6912347	NM_012152.1	NP_036284.1	2140193	S	1007	GCATCCCCTCCACAGTCCTCAGCAGGAGTGACACAGGCAGCCAGTACATA	-	85052161-85052210	0	0	0	LPAR3	lysophosphatidic acid receptor 3	Plasma Membrane	G-protein coupled receptor	-	-	-	-	-	-
CTSA	-0.254869	11.6452	-1.40881	0.173903	0.551129	-5.90051	0	-1.45859	11.6452	-8.0625	8.7558e-08	6.86978e-06	8.03326	1	ILMN_1719286	CTSA	ILMN_10174	5476	119395728	NM_000308.2	NP_000299.2	6840246	S	1856	CAAGCAGCCATACTGATGACCACAGCAACCAGCTCCACGGCCTGATGCAG	+	43960481-43960496:43960497-43960530	0	0	0	CTSA	cathepsin A	Cytoplasm	peptidase	-0.342234	0.243359	X	-1.25733	0.00114926	2
EEF1B2	0.0295668	11.2798	0.184405	0.855511	0.965712	-6.86561	0	-0.900027	11.2798	-5.61337	1.57042e-05	0.000479979	2.81759	1	ILMN_1694587	EEF1B2	ILMN_137136	1933	16519564	NM_001959.2	NP_001950.1	6330373	A	356	GTGTCCAGCCCACCGCCTGCCGACTTGTGTCATGCCCTACGTTGGTATAA	+	206733597-206733646	0	0	0	EEF1B2	eukaryotic translation elongation factor 1 beta 2	Cytoplasm	translation regulator	-	-	-	-	-	-
CTSF	-0.108719	8.35923	-0.364965	0.718882	0.924892	-6.81433	0	-1.05009	8.35923	-3.52511	0.00207087	0.0264216	-2.0226	1	ILMN_1804955	CTSF	ILMN_138148	8722	6042195	NM_003793.2	NP_003784.2	3930020	S	1701	CTGCTTCCCTGCACCCCATTCCCACCCTGAAGTTCTGCACCTGCACCTTT	-	66087774-66087823	0	0	0	CTSF	cathepsin F	Cytoplasm	peptidase	-0.705827	0.490331	X	-1.46002	0.133122	1
CTSH	-0.410924	13.1619	-3.33478	0.00322574	0.0416903	-2.2853	0	0.682541	13.1619	5.53904	1.85979e-05	0.00055275	2.64808	1	ILMN_2390853	CTSH	ILMN_8602	1512	23110954	NM_004390.2	NP_004381.2	1980288	A	1299	CAAAGATCACCAGCCATGTGCCTTAGTGTCCTTCTTAACAGACTCAAACC	-	77001283-77001332	0	0	0	CTSH	cathepsin H	Cytoplasm	peptidase	-0.274335	0.160674	X	0.436265	0.0322193	2
CTSK	-0.241191	9.94505	-1.0134	0.322703	0.717441	-6.36329	0	-1.6114	9.94505	-6.77052	1.22722e-06	5.92392e-05	5.37837	1	ILMN_1758895	CTSK	ILMN_16923	1513	23110958	NM_000396.2	NP_000387.1	1430278	S	1352	AGGCTAAGAGATGTGACTACAGCCTGCCCCTGACTGTGTTGTCCCAGGGC	-	149035611-149035660	0	0	0	CTSK	cathepsin K	Cytoplasm	peptidase	-0.293938	0.668045	X	-1.5554	0.0165029	2
CTSS	-0.00911214	10.7204	-0.0381244	0.969958	0.993372	-6.88249	0	-0.991524	10.7204	-4.14845	0.000477038	0.00800564	-0.583101	1	ILMN_1743032	CTSS	ILMN_178498	1520	23110961	NM_004079.3	NP_004070.3	6330484	S	3691	GACTGTCATGTAAGAGGTGCTCTCCTGGCACCCAGAGAAAAGGAGCATCC	-	148969534-148969583	0	0	0	CTSS	cathepsin S	Cytoplasm	peptidase	-0.357904	0.171082	X	-0.6353	0.0222441	2
AK2	1.22685	9.16213	7.73325	1.67983e-07	1.86741e-05	7.46646	1	-0.344478	9.16213	-2.17137	0.0418219	0.249621	-4.86135	0	ILMN_1716053	AK2	ILMN_1688	204	26665889	NM_001625.2	NP_001616.1	5720669	A	674	ATGCATCCCAGACCCCCGATGTCGTGTTCGCAAGCATCCTAGCAGCCTTC	-	33251407-33251456	0	0	0	AK2	adenylate kinase 2	Cytoplasm	kinase	1.36804	0.000237762	2	-0.466911	0.0378707	X
CTTN	0.444805	7.61512	4.65888	0.000143103	0.00368534	0.759818	0	0.650698	7.61512	6.81539	1.1155e-06	5.48777e-05	5.47437	1	ILMN_2393712	CTTN	ILMN_4414	2017	20357555	NM_138565.1	NP_612632.1	3850632	A	2646	GAGCCGCCAGGAACCCTCCTCCTGTCAATGGGGGTGTAGTATTTTTGCCA	+	69959846-69959895	0	0	0	CTTN	cortactin	Plasma Membrane	other	0.650063	0.00593888	X	0.649896	0.00481222	2
CUTA	-0.491553	10.8165	-3.04071	0.00633992	0.0700002	-2.93197	0	-1.20663	10.8165	-7.46413	2.89232e-07	1.81428e-05	6.83206	1	ILMN_1712390	CUTA	ILMN_6058	51596	62526023	NM_001014838.1	NP_001014838.1	1030427	A	839	AACAGGGGAACTTTCCGTACCTGCAGTGGGTGCGCCAGGTCACAGAGTCA	-	33492434-33492483	0	0	0	CUTA	cutA divalent cation tolerance homolog (E. coli)	unknown	other	-0.242206	0.275261	X	-1.33711	0.000178097	2
EGR2	0.582462	9.18294	2.46863	0.0224768	0.168161	-4.11858	0	1.03894	9.18294	4.40331	0.000261264	0.00488139	0.0124308	1	ILMN_1743199	EGR2	ILMN_10721	1959	9845523	NM_000399.2	NP_000390.2	6020255	S	2602	GCATGCAATTGTGTTGGAAGTGTCCTTGGTCGCCTTGTGTGATGTAGACA	-	64242090-64242139	0	0	0	EGR2	early growth response 2	Nucleus	transcription regulator	-	-	-	-	-	-
CUTA	-0.15153	9.54589	-1.2832	0.213762	0.608282	-6.06157	0	-1.16469	9.54589	-9.86293	3.18147e-09	4.63469e-07	11.3545	1	ILMN_2311989	CUTA	ILMN_10139	51596	62526025	NM_001014840.1	NP_001014840.1	3120707	A	494	CTGCAGCCTTTGTTACTTGCCCCAACGAGAAGGTCGCCAAGGAGATCGCC	-	33493237-33493286	0	0	0	CUTA	cutA divalent cation tolerance homolog (E. coli)	unknown	other	-0.242206	0.275261	X	-1.33711	0.000178097	2
EID3	0.585658	7.50736	4.39579	0.000265937	0.00607312	0.148482	1	0.0848576	7.50736	0.636919	0.531238	0.854923	-6.85981	0	ILMN_1776000	EID3	ILMN_22737	493861	56605997	NM_001008394.1	NP_001008395.1	3190672	S	1036	TGGGTGAGGGAAATGATTCCAGTTGCCATGGCAGGAAACAGGGAGTTATA	+	103222714-103222763	0	0	0	EID3	EP300 interacting inhibitor of differentiation 3	Cytoplasm	other	-	-	-	-	-	-
AKAP11	-0.682847	8.44557	-5.10162	5.08697e-05	0.00164516	1.78382	1	-0.189389	8.44557	-1.41494	0.172121	0.55295	-6.0747	0	ILMN_2293758	AKAP11	ILMN_13368	11215	21464140	NM_016248.2	NP_057332.1	1450333	I	9532	TCCGGTTTTAATATTGCTGGATTTGCTACCTTTGGTTACTTGTGCAGTGT	+	41795015-41795064	0	0	0	AKAP11	A kinase (PRKA) anchor protein 11	Cytoplasm	other	-1.32355	7.3397e-05	2	-0.821718	0.000517626	X
AKAP11	-0.6348	8.47667	-5.3542	2.83904e-05	0.00104515	2.36272	1	-0.882075	8.47667	-7.43983	3.03924e-07	1.87986e-05	6.78223	1	ILMN_2280189	AKAP11	ILMN_12003	11215	21464141	NM_144490.1	NP_652761.1	5720731	I	5408	GTGGTGTGCTCGTTGCATATACAGTGTCCAGGGTCTCACCTCCAGAGATG	+	41782453-41782502	0	0	0	AKAP11	A kinase (PRKA) anchor protein 11	Cytoplasm	other	-1.32355	7.3397e-05	2	-0.821718	0.000517626	2
CXCL12	-0.331292	7.81212	-1.52058	0.143666	0.502077	-5.74688	0	-0.893749	7.81212	-4.10217	0.000532168	0.0087444	-0.691	1	ILMN_1791447	CXCL12	ILMN_4631	6387	76563931	NM_199168.2	NP_954637.1	4560020	I	1411	CAGTGAATAAACCATCATCTTGCCACTACCCCCTCCTGAAGCCACAGCAG	-	44192985-44193034	0	0	0	CXCL12 (includes EG:20315)	chemokine (C-X-C motif) ligand 12	Extracellular Space	cytokine	-0.36559	0.53823	X	-1.35165	0.0211723	2
CXCL16	0.173113	12.778	1.15244	0.262423	0.661894	-6.21557	0	1.39497	12.778	9.28659	8.79634e-09	1.04903e-06	10.338	1	ILMN_1728478	CXCL16	ILMN_29805	58191	11545764	NM_022059.1	NP_071342.1	6280332	S	2081	CCATACGGGTTGGTTTCACCTCCTCAGTCCCTTGCCTACCCCAGTGAGAG	-	4583661-4583710	0	0	0	CXCL16	chemokine (C-X-C motif) ligand 16	Extracellular Space	cytokine	0.452757	0.224638	X	1.6627	0.000927903	2
AKAP11	-0.777196	9.0655	-5.67302	1.3717e-05	0.000581091	3.08579	1	-0.58097	9.0655	-4.24071	0.000383581	0.00669271	-0.36771	0	ILMN_1693220	AKAP11	ILMN_13368	11215	21464140	NM_016248.2	NP_057332.1	6420398	I	9241	CCCTGTCCACCTGTCACCAGCACAAGAGAATTAGAGCTTCAGTGAGAATT	+	41794724-41794773	0	0	0	AKAP11	A kinase (PRKA) anchor protein 11	Cytoplasm	other	-1.32355	7.3397e-05	2	-0.821718	0.000517626	X
AKNA	-0.966268	9.83675	-4.94014	7.40648e-05	0.00219594	1.41144	1	-1.20097	9.83675	-6.1401	4.8222e-06	0.000180194	4.00262	1	ILMN_1770673	AKNA	ILMN_5357	80709	151301136	NM_030767.3	NP_110394.3	2850010	S	5052	TGGCAGCAGAGGCCTTTCCCTCAGACAAGCTACAAAGTGCCCAGGATGCC			0	0	0	AKNA	AT-hook transcription factor	Nucleus	other	-1.33006	0.000475252	2	-1.41032	0.000202006	2
AKR1C2	2.66033	7.6703	9.88383	3.06856e-09	7.92337e-07	11.4192	1	0.441461	7.6703	1.64014	0.116257	0.454905	-5.75354	0	ILMN_2412336	AKR1C2	ILMN_13963	1646	45446741	NM_001354.4	NP_001345.1	5340129	A	1475	CCTGCTTGGCGACTTCAGTAAGCTACAGCTAAGCCCATCGGCCGGAAAAG	-	5022030-5022079	0	0	0	AKR1C1/AKR1C2	aldo-keto reductase family 1, member C2 (dihydrodiol dehydrogenase 2; bile acid binding protein; 3-alpha hydroxysteroid dehydrogenase, type III)	Cytoplasm	enzyme	3.69721	0.000107308	2	0.702846	0.158286	X
AKR1C3	1.21383	8.48562	6.86967	9.94236e-07	7.75091e-05	5.69835	1	0.0511576	8.48562	0.289526	0.775092	0.944806	-7.02541	0	ILMN_1713124	AKR1C3	ILMN_11871	8644	24497582	NM_003739.4	NP_003730.4	7210632	S	1111	GCCGGTGACTGGACATATCACCTCTACTTAAATCCGTCCTGTTTAGCGAC	+	5139765-5139814	0	0	0	AKR1C3	aldo-keto reductase family 1, member C3 (3-alpha hydroxysteroid dehydrogenase, type II)	Cytoplasm	enzyme	1.78182	0.00347872	2	0.639886	0.187858	X
AKR7A2	-0.662692	10.3204	-4.1977	0.000424616	0.00880668	-0.311722	1	-0.173432	10.3204	-1.09857	0.284712	0.692612	-6.4585	0	ILMN_1677043	AKR7A2	ILMN_182370	8574	41327763	NM_003689.2	NP_003680.2	6180681	S	1260	TACACTGTGAAAGGTGGGGGGTGAGTCCCACTTGAGCGCTTCCTGTTGAA	-	19503098-19503147	0	0	0	AKR7A2	aldo-keto reductase family 7, member A2 (aflatoxin aldehyde reductase)	Cytoplasm	enzyme	-0.59589	0.0273666	2	-0.270553	0.297499	X
CXCR4	-0.377347	9.97887	-2.01012	0.0577845	0.307465	-4.97121	0	-1.36566	9.97887	-7.27484	4.26351e-07	2.49183e-05	6.44179	1	ILMN_2320888	CXCR4	ILMN_26451	7852	56790926	NM_001008540.1	NP_001008540.1	1300280	A	1273	TGTGAGCAGAGGGTCCAGCCTCAAGATCCTCTCCAAAGGAAAGCGAGGTG	-	136588961-136589010	0	0	0	CXCR4	chemokine (C-X-C motif) receptor 4	Plasma Membrane	G-protein coupled receptor	-0.696536	0.10163	X	-1.38438	0.0051992	2
CXCR5	0.50848	7.65421	2.3109	0.0313656	0.209771	-4.42356	0	2.16801	7.65421	9.85304	3.2364e-09	4.68673e-07	11.3375	1	ILMN_2337928	CXCR5	ILMN_19896	643	14589868	NM_032966.1	NP_116743.1	3890400	A	2621	GTGAGAGTGTCTTCACGGCAGGACAACGAGGAAGCCCTAAGACGTCCCTT	+	118271931-118271980	0	0	0	CXCR5	chemokine (C-X-C motif) receptor 5	Plasma Membrane	G-protein coupled receptor	0.28466	0.228696	X	1.2603	0.000346838	2
ALDH3A2	-0.836323	10.2902	-7.12555	5.8096e-07	4.92223e-05	6.23304	1	-1.37178	10.2902	-11.6877	1.62926e-10	4.05669e-08	14.3067	1	ILMN_1794825	ALDH3A2	ILMN_15882	224	73465985	NM_000382.2	NP_000373.1	1690608	A	3160	GGTACTCTGCTGAGTGGGCAAGGCTGAAGAAGAGGCCTGTGGAATGCAGC	+	19520958-19521007	0	0	0	ALDH3A2	aldehyde dehydrogenase 3 family, member A2	Cytoplasm	enzyme	-0.787125	0.00486195	2	-1.48108	0.00012443	2
ALDH3A2	-0.639993	9.33124	-4.95244	7.19705e-05	0.00215215	1.43986	1	-1.14809	9.33124	-8.88424	1.83289e-08	1.89109e-06	9.60272	1	ILMN_2401641	ALDH3A2	ILMN_15293	224	73466519	NM_001031806.1	NP_001026976.1	3120196	A	3361	GCAGTTCTATGCCTTGGAGCTCCTGACTGCAGGGACTCTGTCCCCACACT	+	19521034-19521083	0	0	0	ALDH3A2	aldehyde dehydrogenase 3 family, member A2	Cytoplasm	enzyme	-0.787125	0.00486195	2	-1.48108	0.00012443	2
CYBRD1	-0.23016	9.07288	-1.15494	0.261424	0.660951	-6.21277	0	-1.32309	9.07288	-6.63923	1.62503e-06	7.50283e-05	5.09598	1	ILMN_1712305	CYBRD1	ILMN_4649	79901	19923602	NM_024843.2	NP_079119.2	2370300	S	3633	CGGCTTCCTGTGCTGCTTGTGTCAAATGGAACCTGCCCTCTAAAGCACTT	+	172122282-172122331	0	0	0	CYBRD1	cytochrome b reductase 1	Cytoplasm	enzyme	-0.371262	0.525257	X	-1.61963	0.00834463	2
CYBRD1	-0.407708	9.27793	-1.57318	0.13101	0.481368	-5.67135	0	-1.43086	9.27793	-5.52112	1.93734e-05	0.000570586	2.60715	1	ILMN_2087692	CYBRD1	ILMN_4649	79901	19923602	NM_024843.2	NP_079119.2	2450465	S	3857	CCCCTGCTGAGTTGGAAATTCCAGTGCAGCACTGATTGACCACAGTTGCC	+	172122506-172122555	0	0	0	CYBRD1	cytochrome b reductase 1	Cytoplasm	enzyme	-0.371262	0.525257	X	-1.61963	0.00834463	2
ALOX5	-1.75173	11.9626	-7.5258	2.55153e-07	2.57805e-05	7.05122	1	0.540822	11.9626	2.32349	0.0305518	0.201731	-4.57634	0	ILMN_1680996	ALOX5	ILMN_174220	240	113421969	XM_001127464.1	XP_001127464.1	1780273	A	2055	GCACAGCGTCCTGTCCACACCCAGCTCAGCATTTCCACACCAAGCAGCAA			0	0	0	ALOX5	arachidonate 5-lipoxygenase	Cytoplasm	enzyme	-1.58473	0.00154584	2	0.22013	0.589517	X
AMICA1	-0.720317	9.63143	-3.55244	0.00194263	0.0283676	-1.79569	1	-0.230382	9.63143	-1.13619	0.269007	0.676252	-6.41726	0	ILMN_1778723	AMICA1	ILMN_14597	120425	23397450	NM_153206.1	NP_694938.1	1580465	S	1639	CTCTCCTGTGTGTGTCCTGGGCCACTCTACCAGTGATTTCAGACTCCCGC	-	117570158-117570207	0	0	0	AMICA1	adhesion molecule, interacts with CXADR antigen 1	Plasma Membrane	other	-0.80396	0.0177652	2	-0.171402	0.626187	X
CYFIP1	-0.334073	9.40316	-1.9361	0.0667888	0.334644	-5.09832	0	-0.615614	9.40316	-3.56776	0.00187419	0.0244035	-1.92546	1	ILMN_2355463	CYFIP1	ILMN_6477	23191	74271906	NM_001033028.1	NP_001028200.1	6420239	A	2662	TCATCACCATCCTGGATAAGTACCTGAAGTCAGGCGACGGGGAGGGCACG	+	20554372-20554421	0	0	0	CYFIP1	cytoplasmic FMR1 interacting protein 1	Cytoplasm	other	-0.638121	0.00293841	X	-0.683655	0.00152384	2
CYP1B1	0.202989	11.8176	0.999511	0.32922	0.721247	-6.3771	0	1.17908	11.8176	5.80577	1.01651e-05	0.000334423	3.25385	1	ILMN_1693338	CYP1B1	ILMN_183945	1545	13325059	NM_000104.2	NP_000095.1	2120053	S	4718	GCTTTCATGTCCCAGAACTTAGCCTTTACCTGTGAAGTGTTACTACAGCC	-	38148604-38148653	0	0	0	CYP1B1	cytochrome P450, family 1, subfamily B, polypeptide 1	Cytoplasm	enzyme	0.00082795	0.997008	X	0.647088	0.00274544	2
AMPD3	0.850045	8.78768	6.20016	4.22354e-06	0.000234757	4.25817	1	0.907775	8.78768	6.62124	1.68905e-06	7.73979e-05	5.05713	1	ILMN_1774447	AMPD3	ILMN_13998	272	70906424	NM_000480.2	NP_000471.1	150504	A	4116	GCCTGTCCCCTCCACTGGTCAATTCAGCATATGGAAGTATAAATGCAGTC	+	10485447-10485496	0	0	0	AMPD3	adenosine monophosphate deaminase 3	Cytoplasm	enzyme	0.988356	0.00165374	2	1.27368	0.000284025	2
CYP2S1	0.109976	9.08331	0.592354	0.560102	0.863802	-6.70268	0	1.14226	9.08331	6.15246	4.69226e-06	0.000176419	4.03006	1	ILMN_1705403	CYP2S1	ILMN_1069	29785	51988884	NM_030622.6	NP_085125.1	6770474	I	2443	TCACTGATCTACAGCCCCTGTTCGGCGTCAGAGTCCCCACTAGACCCAGT	+	46405106-46405155	0	0	0	CYP2S1	cytochrome P450, family 2, subfamily S, polypeptide 1	Cytoplasm	enzyme	0.0549853	0.916572	X	1.38222	0.00379642	2
D2HGDH	-0.203191	10.481	-1.01469	0.322099	0.71685	-6.36199	0	-0.873119	10.481	-4.36018	0.000289261	0.00531495	-0.0884335	1	ILMN_2206272	D2HGDH	ILMN_18076	728294	119964727	NM_152783.3	NP_689996.4	2710129	S	2387	GTGCTCTGAGTTTCGGGTTCTGCTCCTACAAAGAACGTGCGGTGCTGCGG	+	242356705-242356754	0	0	0	D2HGDH	D-2-hydroxyglutarate dehydrogenase	Cytoplasm	other	-0.0160984	0.953016	X	-0.218922	0.280659	d
ANAPC4	-0.6026	9.78325	-6.21555	4.08278e-06	0.000228758	4.29192	1	-0.342005	9.78325	-3.52764	0.00205866	0.0263071	-2.01685	0	ILMN_1802973	ANAPC4	ILMN_16297	29945	41327748	NM_013367.2	NP_037499.2	6450021	S	2461	GAGTCAGAGGCAGAGAACCAACAAGCTGGTGCTGCCGCTTTAGCTCCAGA	+	25029007-25029056	0	0	0	ANAPC4	anaphase promoting complex subunit 4	Nucleus	enzyme	-0.559815	0.00324513	2	-0.337423	0.0303983	X
ANAPC5	-0.780437	10.5472	-6.95021	8.38753e-07	6.7103e-05	5.86762	1	-0.48506	10.5472	-4.31972	0.000318263	0.00573979	-0.183045	0	ILMN_1723177	ANAPC5	ILMN_5146	51433	34147585	NM_016237.3	NP_057321.2	4730408	S	2194	ACGTCGTTTACTTCCAGGCCAGACTCTACCATACCCTGGGGAAGACCCAG	-	120230749-120230798	0	0	0	ANAPC5	anaphase promoting complex subunit 5	Nucleus	enzyme	-0.793712	0.00252973	2	-0.586805	0.00931026	X
DAP3	-0.0826312	10.1891	-0.745231	0.464606	0.814873	-6.59887	0	-0.600166	10.1891	-5.41275	2.4821e-05	0.000700991	2.35895	1	ILMN_1781680	DAP3	ILMN_13395	7818	16905525	NM_033657.1	NP_387506.1	3180215	A	1300	AAAAGAGCTGCTGTTCCTAAGTAACGCGAACCCCTCGCTGCTGGAGCGGC	+	153974592-153974641	0	0	0	DAP3	death associated protein 3	Cytoplasm	other	-0.207713	0.238283	X	-0.572944	0.00516532	2
ENDOGL1	4.02647	9.55693	8.51112	3.68794e-08	5.67757e-06	8.96951	1	3.92614	9.55693	8.29904	5.53182e-08	4.65455e-06	8.49448	1	ILMN_1709747	ENDOGL1	ILMN_22280	9941	142381704	NM_005107.2	NP_005098.1	4570008	S	1085	ACTCAAAGCTAAGGAGCAGTCAGGAACCCAGATAAGAAAGCCATCCTAGT	+	38540809-38540857:38540858-38540858	0	0	0	EXOG	endo/exonuclease (5'-3'), endonuclease G-like	Cytoplasm	enzyme	-	-	-	-	-	-
DBP	-0.495484	8.03423	-3.97299	0.000722121	0.0133224	-0.832182	0	-1.22004	8.03423	-9.78279	3.656e-09	5.17037e-07	11.2157	1	ILMN_1715555	DBP	ILMN_1724	1628	31542492	NM_001352.2	NP_001343.2	7050458	S	1071	GAAAAATCCAGGTGCCGGAGGAGCAGAAGGATGAGAAATACTGGAGCCGG	-	53826100-53826121:53828513-53828540	0	1	0	DBP	D site of albumin promoter (albumin D-box) binding protein	Nucleus	transcription regulator	-1.01094	0.0238162	X	-2.16184	0.000400504	2
DCBLD1	0.543084	8.05475	3.63429	0.00160357	0.0247024	-1.60971	0	0.741356	8.05475	4.96111	7.05301e-05	0.00164926	1.31497	1	ILMN_1695604	DCBLD1	ILMN_23347	285761	27735142	NM_173674.1	NP_775945.1	5700747	S	1514	GGTGCTCCTTGTTGTCCTGGTGTTTGCTGGAATGGGGATCTTTGCAGCCT	+	117971011-117971060	0	0	0	DCBLD1	discoidin, CUB and LCCL domain containing 1	Extracellular Space	other	0.272984	0.348364	X	0.714856	0.0189521	2
DCTD	-0.49992	10.402	-3.21768	0.00422809	0.0514177	-2.54512	0	-0.759147	10.402	-4.88616	8.40121e-05	0.00190696	1.1405	1	ILMN_1802456	DCTD	ILMN_17664	1635	61742818	NM_001921.2	NP_001912.2	4670519	A	1679	GACAGCTTACTGCAGCACTGTTGGTGTTCGGAGCTCTTCTGTGCCCTGGC	-	184048528-184048577	0	0	0	DCTD	dCMP deaminase	Cytoplasm	enzyme	-0.391071	0.0763871	X	-0.702538	0.00554626	2
ANGPTL4	1.74822	7.3484	18.0888	4.62771e-14	1.32848e-10	21.8822	1	0.0647769	7.3484	0.670243	0.510196	0.846286	-6.8376	0	ILMN_1707727	ANGPTL4	ILMN_20440	51129	21536397	NM_139314.1	NP_647475.1	4610433	A	1828	GGGACACAAGCAGGCGCCAATGGTATCTGGGCGGAGCTCACAGAGTTCTT	+	8345182-8345231	0	0	1	ANGPTL4	angiopoietin-like 4	Extracellular Space	other	1.66285	0.00578249	2	0.177298	0.769182	X
DDA1	0.372631	9.97899	3.3839	0.00287814	0.0384034	-2.1755	0	0.935579	9.97899	8.4961	3.79467e-08	3.42939e-06	8.87286	1	ILMN_1694530	DDA1	ILMN_29105	79016	60279701	NM_024050.4	NP_076955.1	7050349	S	953	TGCACGCACGTTGGGGAGAAGTCGGCCCTTGGGATCTTTCTCTTGAGTCA	+	17291997-17292046	0	0	0	DDA1	DET1 and DDB1 associated 1	unknown	other	0.407343	0.11434	X	0.700423	0.0131179	2
ANKFY1	-0.587283	9.97306	-8.05738	8.84395e-08	1.1269e-05	8.1031	1	-0.219026	9.97306	-3.00499	0.00687577	0.0684659	-3.17976	0	ILMN_1794470	ANKFY1	ILMN_8333	51479	110815812	NM_016376.3	NP_057460.3	450300	I	7212	GCTGGGCAGAAACTGCAGGCACACATTTGGGTGGATCACCTGGCTTCCAG	-	4014111-4014160	0	0	0	ANKFY1	ankyrin repeat and FYVE domain containing 1	Nucleus	transcription regulator	-0.440689	0.0392055	2	-0.0226211	0.938028	X
ANKRD10	0.816612	8.52975	7.3361	3.75839e-07	3.45418e-05	6.66623	1	0.20826	8.52975	1.87092	0.0757251	0.359702	-5.38741	0	ILMN_1711828	ANKRD10	ILMN_17120	55608	70995240	NM_017664.2	NP_060134.2	4540689	S	1920	CTTTGCAGATCACCATGTGGTTGAAGGTTTTAGTTGTGGACACAGTGGTC	-	110329413-110329462	0	0	0	ANKRD10	ankyrin repeat domain 10	Nucleus	transcription regulator	1.00095	0.000338266	2	0.084058	0.668808	X
DDT	0.195464	10.6424	1.47826	0.154566	0.5202	-5.80617	0	-0.662189	10.6424	-5.008	6.32334e-05	0.00150386	1.42395	1	ILMN_1690982	DDT	ILMN_24330	1652	145386585	NM_001355.3	NP_001346.1	2360593	S	421	TCCGCTTTTTCCCCTTGGAGTCCTGGCAGATTGGCAAGATAGGGACGGTC	-	22643754-22643803	0	0	0	DDT	D-dopachrome tautomerase	Cytoplasm	enzyme	0.380301	0.0852815	X	-0.438822	0.0507798	d
ANKRD10	0.613131	9.16165	4.95024	7.23405e-05	0.00215492	1.43478	1	0.251248	9.16165	2.02851	0.0557221	0.299203	-5.11797	0	ILMN_2115218	ANKRD10	ILMN_17120	55608	70995240	NM_017664.2	NP_060134.2	6900674	S	2055	CCACACTTCCTACTTGGTCTCTGGAAGTTTTACCACATGTAACAGATTCC	-	110329278-110329327	0	0	0	ANKRD10	ankyrin repeat domain 10	Nucleus	transcription regulator	1.00095	0.000338266	2	0.084058	0.668808	X
ANO6	0.802659	10.0406	6.28266	3.52307e-06	0.000205415	4.43873	1	0.467078	10.0406	3.65596	0.00152403	0.0205912	-1.72377	0	ILMN_1674941	ANO6	ILMN_8507	196527	70778894	NM_001025356.1	NP_001020527.1	7040674	S	5381	CCCTGGGGAAATTGATGGGTGTGGCAGTGGACCTGTGAAGAGGGAGAATC	+	44111807-44111856	0	0	0	ANO6	anoctamin 6	Plasma Membrane	other	0.651899	0.0063805	2	0.426279	0.0390851	X
ANXA1	0.761901	12.115	4.40961	0.000257407	0.00590597	0.180592	1	0.354388	12.115	2.05107	0.0532818	0.291052	-5.07819	0	ILMN_2184184	ANXA1	ILMN_14184	301	4502100	NM_000700.1	NP_000691.1	6520215	S	1088	CCTGGTGGCTCTTTGTGGAGGAAACTAAACATTCCCTTGATGGTCTCAAG	+	74974816-74974843:74974844-74974865	0	1	1	ANXA1	annexin A1	Plasma Membrane	other	0.644488	0.014774	2	0.157788	0.548297	X
ANXA5	0.589965	13.0652	5.6769	1.35972e-05	0.000578021	3.09452	1	0.460937	13.0652	4.43534	0.000242248	0.00459649	0.087349	0	ILMN_1741003	ANXA5	ILMN_26606	308	4809273	NM_001154.2	NP_001145.1	1070451	S	1184	GTGCCTGCACCACCCCACTGCCTTCCTTCAGCACCTTTAGCTGCATTTGT	-	122808996-122809045	0	0	0	ANXA5	annexin A5	Plasma Membrane	other	0.448793	0.0207082	2	0.218582	0.227175	X
AP1B1	-1.1335	10.844	-5.13267	4.73365e-05	0.00155354	1.85523	1	-0.738353	10.844	-3.34337	0.00316209	0.0372564	-2.43321	1	ILMN_1781983	AP1B1	ILMN_27296	162	22027652	NM_145730.1	NP_663782.1	5960201	A	4013	GGATTGAAAGCTGCCTCCGAGTGGTTGGGGATGGTTTTCTGACCCTACGG	-	28053760-28053809	0	0	0	AP1B1	adaptor-related protein complex 1, beta 1 subunit	Cytoplasm	transporter	-1.08472	0.0079179	2	-0.892455	0.0174244	2
AP2A2	-0.876706	8.79479	-5.28967	3.29339e-05	0.00117488	2.21529	1	-1.3339	8.79479	-8.04819	9.00466e-08	7.04239e-06	8.0051	1	ILMN_1803779	AP2A2	ILMN_3557	161	71725392	NM_012305.2	NP_036437.1	6270041	S	4243	TGCACCCCACAATGTCTGCGGCTCTTCTTCCGGCGTGTCGGGCTTTGATC	+	1001867-1001916	0	0	0	AP2A2	adaptor-related protein complex 2, alpha 2 subunit	Cytoplasm	transporter	-1.08119	0.00121904	2	-1.60468	9.81325e-05	2
DDX59	0.185844	8.80703	1.4025	0.175755	0.553695	-5.90891	0	0.797872	8.80703	6.02125	6.2764e-06	0.000222764	3.73788	1	ILMN_1748077	DDX59	ILMN_10085	83479	145279207	NM_001031725.3	NP_001026895.1	1300279	I	1904	CTGGGATATTGCAAAACGAGTAAAGCCCACAGGATCCATTCTTCCCCCTC	-	198880154-198880203	0	0	0	DDX59	DEAD (Asp-Glu-Ala-Asp) box polypeptide 59	unknown	enzyme	0.173987	0.402514	X	1.09858	0.000296149	2
DEAF1	-0.21853	8.21983	-1.39352	0.178414	0.557567	-5.92079	0	-0.614094	8.21983	-3.91594	0.000826233	0.0125535	-1.12405	1	ILMN_1658902	DEAF1	ILMN_138757	10522	89034443	XM_938667.1	XP_943760.1	7610279	A	2006	ACGTGGCTGAAAGCGTGATGGAGAAGGTGACCGTGTGAGGCTCCATCGGC			0	0	1	DEAF1	deformed epidermal autoregulatory factor 1 (Drosophila)	Nucleus	transcription regulator	-0.731548	0.0288168	X	-0.928127	0.00853716	2
DENND2D	-0.390209	9.11596	-1.7836	0.0893266	0.393725	-5.34969	0	-1.24339	9.11596	-5.68337	1.33995e-05	0.000420258	2.97673	1	ILMN_1707088	DENND2D	ILMN_26277	79961	34147689	NM_024901.3	NP_079177.2	6020327	S	1779	CCCTGGTATTGATTTCTCAGGACTTTGGAGGGCTCTGACACCATGCTCAC	-	111531537-111531586	0	0	0	DENND2D	DENN/MADD domain containing 2D	Cytoplasm	other	-0.57809	0.223968	X	-2.18685	0.000782819	2
APBB1IP	-0.797305	10.5984	-3.73153	0.00127601	0.0207504	-1.38763	1	-0.526125	10.5984	-2.46236	0.0227798	0.164892	-4.3065	0	ILMN_1801710	APBB1IP	ILMN_19412	54518	56118220	NM_019043.3	NP_061916.3	1820722	S	2330	CATGATGAGTGTTCCAGAGGGAGAAGCATCGCTGACCCCGAGCGCAGGTT	+	26896431-26896480	0	0	0	APBB1IP	amyloid beta (A4) precursor protein-binding, family B, member 1 interacting protein	Cytoplasm	other	-1.30129	0.00134575	2	-0.656934	0.0296654	X
DENND5B	0.483556	7.7344	5.80686	1.01401e-05	0.000460331	3.38637	0	0.892576	7.7344	10.7187	7.54869e-10	1.46388e-07	12.7874	1	ILMN_1791593	DENND5B	ILMN_171454	160518	122891861	NM_144973.3	NP_659410.3	1190047	S	6346	CACCAGGCTGCATGAGACTGACCTTCCGGCATTCTTACTAATAGTCTTTC	-	31429419-31429468	0	0	0	DENND5B	DENN/MADD domain containing 5B	unknown	other	1.21139	0.00815192	X	1.47321	0.00244313	2
APEX1	-1.2025	9.84915	-9.33539	8.058e-09	1.72477e-06	10.4707	1	-1.27517	9.84915	-9.89953	2.98649e-09	4.37744e-07	11.4177	1	ILMN_2319344	APEX1	ILMN_9983	328	18375500	NM_001641.2	NP_001632.2	3120309	A	929	GGCTTCCCGAAAGCCCCTTGTGCTGTGTGGAGACCTCAATGTGGCACATG	+	19995147-19995196	1	0	0	APEX1	APEX nuclease (multifunctional DNA repair enzyme) 1	Nucleus	enzyme	-1.48906	0.00143659	2	-1.27924	0.0022645	2
DHDDS	-0.414273	8.44997	-4.81743	9.86603e-05	0.00273496	1.12754	0	-0.641758	8.44997	-7.46277	2.90036e-07	1.81699e-05	6.82927	1	ILMN_2405642	DHDDS	ILMN_11082	79947	45580741	NM_024887.2	NP_079163.2	2350576	A	2882	CCCTATGAGCGTGGCTGTTGAGTCCTGTCTCCTGGGTCTGACTTTCCGTA	+	26669965-26670014	0	0	0	DHDDS	dehydrodolichyl diphosphate synthase	unknown	enzyme	-0.596755	0.0342744	X	-0.317119	0.244244	d
APEX1	-1.19925	10.6144	-8.02572	9.41007e-08	1.19281e-05	8.04156	1	-1.29297	10.6144	-8.65289	2.82159e-08	2.70217e-06	9.17014	1	ILMN_1661886	APEX1	ILMN_1992	328	18375504	NM_080649.1	NP_542380.1	6510053	A	1149	GTTACCTGCATTGTGTGACAGCAAGATCCGTTCCAAGGCCCTCGGCAGTG	+	19995423-19995472	0	0	0	APEX1	APEX nuclease (multifunctional DNA repair enzyme) 1	Nucleus	enzyme	-1.48906	0.00143659	2	-1.27924	0.0022645	2
APPL2	-0.771825	9.9292	-4.43348	0.000243308	0.00566481	0.236093	1	-1.08841	9.9292	-6.25199	3.76845e-06	0.000147362	4.25036	1	ILMN_1765076	APPL2	ILMN_14197	55198	82617617	NM_018171.3	NP_060641.2	4180100	S	2925	CTGTGGACAGGGTGCAGCTCTACCAGTTCCTGTTTCTTCTGAGCCAGACC	-	104091460-104091509	0	0	0	APPL2	adaptor protein, phosphotyrosine interaction, PH domain and leucine zipper containing 2	Cytoplasm	other	-0.882973	0.0346345	2	-1.18359	0.00828816	2
DHRS3	-0.357214	8.66856	-2.09722	0.048587	0.277879	-4.81757	0	-1.1539	8.66856	-6.77464	1.2165e-06	5.88964e-05	5.38719	1	ILMN_1752478	DHRS3	ILMN_12432	9249	62988332	NM_004753.4	NP_004744.2	7040670	S	1562	TGACCCCCACAGGGAGGCAGGAAAACAGCCAGAAGCCACCTTGACACTTT	-	12550720-12550769	0	0	0	DHRS3	dehydrogenase/reductase (SDR family) member 3	Cytoplasm	enzyme	-0.289168	0.377985	X	-0.919157	0.0096643	2
AQP9	2.05448	10.3904	8.17009	7.09892e-08	9.46561e-06	8.321	1	3.70153	10.3904	14.72	2.35189e-12	1.417e-09	18.4475	1	ILMN_1715068	AQP9	ILMN_15164	366	11038652	NM_020980.2	NP_066190.1	160494	S	2700	GAGTTACAAGCACCAGGGGATGCTCTACATCAAGGGATGCACCTTCAGTC	+	56265152-56265201	0	0	0	AQP9	aquaporin 9	Plasma Membrane	transporter	2.33546	3.42992e-05	2	3.15134	4.05405e-06	2
DHRS9	-0.135597	7.68957	-0.712259	0.484346	0.825013	-6.62317	0	-0.736546	7.68957	-3.86891	0.000923203	0.0137209	-1.23302	1	ILMN_2281502	DHRS9	ILMN_184091	10170	40548399	NM_005771.3	NP_005762.2	4490079	I	1373	CAAGGAGAGCGCTCGAGTTGCAATATTTTCCTTTGGCTGCTGACAGGCAG	+	169637369-169637418	0	0	0	DHRS9	dehydrogenase/reductase (SDR family) member 9	Cytoplasm	enzyme	-1.4326	0.00948332	X	-4.89891	1.2759e-05	2
ARC	1.56368	7.33331	9.29442	8.67323e-09	1.77845e-06	10.3983	1	0.385777	7.33331	2.29303	0.0325554	0.21074	-4.63432	0	ILMN_1711120	ARC	ILMN_28586	23237	56676395	NM_015193.3	NP_056008.1	430674	S	2675	CAGACCACTCTGACAAGTCTTCAGCCCACACCCTGCCAGCCCCACAGATT	-	143689630-143689679	0	0	0	ARC	activity-regulated cytoskeleton-associated protein	Cytoplasm	other	3.36869	0.00308102	2	0.977344	0.284152	X
ARF4	0.893128	8.58017	4.50199	0.000207017	0.00495967	0.395328	1	0.873408	8.58017	4.40259	0.000261709	0.00488784	0.0107438	1	ILMN_1723884	ARF4	ILMN_5548	378	6995998	NM_001660.2	NP_001651.1	1430136	I	191	TCACAAGTGCCACTACCGCCATGGGCCTCACTATCTCCTCCCTCTTCTCC	-	57557878-57557907:57557908-57557927	0	0	0	ARF4	ADP-ribosylation factor 4	Cytoplasm	enzyme	0.645168	0.0041218	2	1.21056	0.000106815	2
DISP1	-0.333925	7.74293	-2.97692	0.00732721	0.0776172	-3.06947	0	-0.598117	7.74293	-5.33217	2.98646e-05	0.00081331	2.17377	1	ILMN_1695745	DISP1	ILMN_161892	84976	25952133	NM_032890.2	NP_116279.2	5570246	S	4617	GTGCAATTCTGTGGACTGTCAAATGCCAAACATGGAAGCCAATGTGCCTG	+	221245832-221245881	0	0	0	DISP1	dispatched homolog 1 (Drosophila)	Plasma Membrane	transporter	-0.351765	0.277395	X	-1.36804	0.00121387	2
ARF4	0.655379	11.0669	4.02649	0.000636388	0.0120004	-0.708498	1	1.25819	11.0669	7.73003	1.69069e-07	1.17367e-05	7.37194	1	ILMN_1719518	ARF4	ILMN_5548	378	6995998	NM_001660.2	NP_001651.1	6770176	A	1260	CCCCTACATTGACTCCTGGCCTACATCAGCCAAACTTAACCTTGGTGGGG	-	57532423-57532472	0	0	0	ARF4	ADP-ribosylation factor 4	Cytoplasm	enzyme	0.645168	0.0041218	2	1.21056	0.000106815	2
DNAJA1	0.551629	11.636	2.88044	0.00910659	0.0906424	-3.27526	0	0.852657	11.636	4.45232	0.000232733	0.00444881	0.127088	1	ILMN_1672496	DNAJA1	ILMN_5819	3301	49472820	NM_001539.2	NP_001530.1	1980632	S	1338	ACATCATCCCAGAGGTGGTGTTCAGTGTCAGACCTCTTAATGGGCCAGTG	+	33028862-33028901:33028902-33028911	0	0	0	DNAJA1	DnaJ (Hsp40) homolog, subfamily A, member 1	Nucleus	other	0.49364	0.0871944	X	0.740094	0.0166727	2
ARFGAP3	0.679976	10.1019	4.35534	0.000292583	0.00654683	0.0544617	1	0.87137	10.1019	5.58125	1.68935e-05	0.000510488	2.74441	1	ILMN_1731287	ARFGAP3	ILMN_17507	26286	28416437	NM_014570.3	NP_055385.2	5090056	S	2051	GCGGATGCTGGATGGGCCTGCAGAAACAACACTCACCACACACACTTCCT	-	41523100-41523149	0	0	0	ARFGAP3	ADP-ribosylation factor GTPase activating protein 3	Cytoplasm	transporter	0.68449	0.0084142	2	1.00682	0.000875291	2
ARHGAP17	-1.44898	11.138	-7.47561	2.82547e-07	2.78424e-05	6.94987	1	-1.21232	11.138	-6.25466	3.74637e-06	0.000146852	4.25627	1	ILMN_1718610	ARHGAP17	ILMN_9156	55114	54860104	NM_018054.4	NP_060524.4	160561	A	3053	GTGACTGCTGGCTCTGTCACCTCATCAAACTGGATGTGACCCATGCCGCC	-	24838354-24838403	0	0	0	ARHGAP17	Rho GTPase activating protein 17	Cytoplasm	other	-1.28378	0.000151808	2	-1.30558	8.43867e-05	2
ARHGAP17	-0.745509	8.89185	-5.36061	2.79754e-05	0.00103507	2.37735	1	-1.10719	8.89185	-7.96126	1.06816e-07	7.97066e-06	7.8335	1	ILMN_2398847	ARHGAP17	ILMN_9156	55114	54860104	NM_018054.4	NP_060524.4	3170520	A	2550	GGAGCAGGGGCAGGCGAACCTCTTTCTTTGCAGACCGAACAGTGAAAAGC	-	24838857-24838906	0	0	0	ARHGAP17	Rho GTPase activating protein 17	Cytoplasm	other	-1.28378	0.000151808	2	-1.30558	8.43867e-05	2
ARHGAP20	0.593114	7.43881	5.927	7.74492e-06	0.000374968	3.65453	1	1.44261	7.43881	14.416	3.47775e-12	1.86507e-09	18.0697	1	ILMN_1782761	ARHGAP20	ILMN_27302	57569	51479147	NM_020809.2	NP_065860.2	6480593	S	5641	CAGCAGGGACTCCCCTTTCCCTTAGGGCATACTACTGTCAGTCAGAACTG	-	109953474-109953523	0	0	0	ARHGAP20	Rho GTPase activating protein 20	Cytoplasm	other	0.841857	0.00765623	2	1.66138	0.000163516	2
ARHGAP22	-1.30179	10.0768	-8.79937	2.14549e-08	3.69979e-06	9.50503	1	-1.37083	10.0768	-9.26609	9.12708e-09	1.08112e-06	10.3011	1	ILMN_1676361	ARHGAP22	ILMN_15801	58504	34013589	NM_021226.2	NP_067049.2	510520	S	2642	GCCCTTACCCAGGAAATATCCTTCATGGCCACAGAAATGGAGGGCGCCCA	-	49324142-49324191	0	0	0	ARHGAP22	Rho GTPase activating protein 22	Cytoplasm	other	-1.7917	0.000117704	2	-1.79193	7.16776e-05	2
ARHGAP23	0.608905	7.40693	6.87929	9.74199e-07	7.60685e-05	5.71862	1	-0.107316	7.40693	-1.21243	0.239157	0.644211	-6.32995	0	ILMN_1764571	ARHGAP23	ILMN_162296	57636	113426860	XM_290799.7	XP_290799.6	4210630	I	6122	GCCCAGGTAGGTGGTGAACCCGCTGCCACGTCTATCAGTCCTCTTGTTTT	+	33921801-33921850	0	0	0	ARHGAP23	Rho GTPase activating protein 23	unknown	other	0.594532	0.0364765	2	-0.232452	0.417484	X
ARHGAP24	1.09064	8.30584	8.96027	1.59298e-08	2.90077e-06	9.799	1	-0.171203	8.30584	-1.40654	0.174568	0.556486	-6.08595	0	ILMN_1801833	ARHGAP24	ILMN_8024	83478	111154098	NM_031305.2	NP_112595.2	4290243	A	2616	GGATTCAGTGAGCCTGCTTTCGCCTGCTGTCTCTGATGGCTCTGGCAAGG	+	87140889-87140899:87140900-87140938	0	0	0	ARHGAP24	Rho GTPase activating protein 24	Cytoplasm	other	1.00727	0.00176424	2	-0.257168	0.294378	X
DNAJC10	-0.109717	8.17148	-0.939148	0.358608	0.746175	-6.43514	0	0.776278	8.17148	6.64476	1.60585e-06	7.44929e-05	5.10793	1	ILMN_2151541	DNAJC10	ILMN_19735	54431	24308126	NM_018981.1	NP_061854.1	4250452	S	3908	CTGTAGTTATTCCAGTTACTAGTTTACTGTCAGAGGGCTGCCTTTTTCAG	+	183351215-183351264	0	0	0	DNAJC10	DnaJ (Hsp40) homolog, subfamily C, member 10	Cytoplasm	enzyme	-0.28427	0.189514	X	1.0402	0.000620327	2
ARHGAP25	-1.56297	9.86079	-10.8803	5.80491e-10	2.30318e-07	13.0453	1	-0.596291	9.86079	-4.15098	0.000474187	0.00797357	-0.577185	1	ILMN_1777998	ARHGAP25	ILMN_14823	9938	55770896	NM_014882.2	NP_055697.1	3850148	A	2552	GACCACGTCCAGTGAAGACATTTGAGGCAGCACATCTCAGGACCCAGGCA	+	68907085-68907134	0	0	0	ARHGAP25	Rho GTPase activating protein 25	Cytoplasm	other	-0.5625	0.0112398	2	-0.343335	0.082706	d
FAM119B	1.29377	9.31981	9.10478	1.2226e-08	2.33982e-06	10.06	1	1.16261	9.31981	8.18179	6.9394e-08	5.64428e-06	8.26682	1	ILMN_1723846	FAM119B	ILMN_17350	25895	45827720	NM_015433.2	NP_056248.2	870056	A	2564	TGGATTCCACCCCTGCCTTCCTAGGTGACCTTGGACAAATTCTCGAACCC	+	56462454-56462503	0	0	0	METTL21B	methyltransferase like 21B	unknown	other	-	-	-	-	-	-
ARHGEF18	-0.814471	11.0556	-4.03927	0.000617459	0.0117187	-0.678929	1	-0.584838	11.0556	-2.90043	0.00870692	0.08203	-3.40454	0	ILMN_1664016	ARHGEF18	ILMN_4153	23370	41327768	NM_015318.2	NP_056133.2	6130725	S	5184	CGTGGGATCTGCACACGTCTTTGTCAGTTGTGGTCATGATCTTAGTCACC	+	7443210-7443259	0	0	0	ARHGEF18	Rho/Rac guanine nucleotide exchange factor (GEF) 18	Cytoplasm	other	-0.73305	0.0195744	2	-0.70296	0.0216811	X
DNER	0.109334	7.1926	1.28943	0.211632	0.60548	-6.05389	0	1.58984	7.1926	18.7498	2.3106e-14	3.75873e-11	22.8231	1	ILMN_1791679	DNER	ILMN_171634	92737	116235484	NM_139072.3	NP_620711.3	4570669	S	2689	CTGTTTGACGTTTGAGTGCCGGCTTTCTGAGTAGAGTTAGGAAAACCACG	-	229931122-229931171	0	0	1	DNER	delta/notch-like EGF repeat containing	Plasma Membrane	transmembrane receptor	0.669596	0.0322447	X	4.6462	1.97015e-06	2
ARID3A	0.789009	10.35	5.31369	3.11618e-05	0.00112543	2.27021	1	-0.752639	10.35	-5.06875	5.49037e-05	0.00134306	1.56499	1	ILMN_1670130	ARID3A	ILMN_18757	1820	118026938	NM_005224.2	NP_005215.1	6510553	S	2546	CCACACACTCACCACTCCCAGCTTCTCGTGTCCAGTGAAACCCCTGAACC	+	923539-923588	0	0	0	ARID3A	AT rich interactive domain 3A (BRIGHT-like)	Nucleus	transcription regulator	0.778596	0.00687373	2	-0.607155	0.0194821	2
ARID5B	1.12396	9.85091	7.89445	1.21883e-07	1.47231e-05	7.78492	1	1.25208	9.85091	8.79435	2.16562e-08	2.17462e-06	9.4355	1	ILMN_1721626	ARID5B	ILMN_165822	84159	74136548	NM_032199.1	NP_115575.1	1410408	S	7061	GTCCAGTGTTGGCTGTTAGTGTATTTGATATTCTGCCTGTCTCCTCATGG	+	63526263-63526312	0	0	0	ARID5B	AT rich interactive domain 5B (MRF1-like)	Nucleus	transcription regulator	1.12561	0.00175889	2	1.22073	0.000811686	2
DOCK5	0.411	7.8419	3.91763	0.000822955	0.0147708	-0.959961	0	0.65299	7.8419	6.22426	4.00526e-06	0.000154885	4.18912	1	ILMN_1752455	DOCK5	ILMN_181144	80005	117553585	NM_024940.6	NP_079216.4	3310682	S	7250	CTCTGTGTTTCCTGTTTCACCGCCACCCTTTCAGGAGAGAACTACACCAG	+	25326231-25326280	0	0	0	DOCK5	dedicator of cytokinesis 5	Cytoplasm	other	0.0264157	0.964303	X	0.819657	0.0558991	1
ARL5A	-0.609865	11.5992	-3.85928	0.000944415	0.0163498	-1.09439	1	-0.851994	11.5992	-5.3915	2.60606e-05	0.000730085	2.31016	1	ILMN_1688526	ARL5A	ILMN_12840	26225	82546835	NM_001037174.1	NP_001032251.1	6270195	A	1205	CTCTGTGTTCTCTGTATTGTACTAACCAACCTCCCAAATCGCTGAGCTGC	-	152367384-152367433	0	0	0	ARL5A	ADP-ribosylation factor-like 5A	unknown	enzyme	-0.759117	0.00168336	2	-1.24381	8.46642e-05	2
FAM130A1	0.528472	8.29807	6.12872	4.94501e-06	0.000262597	4.10115	0	0.60936	8.29807	7.06679	6.56746e-07	3.52979e-05	6.00723	1	ILMN_2187533	FAM130A1	ILMN_23790	81566	13540601	NM_030809.1	NP_110436.1	1110372	S	4216	AGCTAGGCCTCTGATCATAGAAGCAGATAGCTTCAGTCCCAGTCTAGGCC	-	49741460-49741509	0	0	1	CSRNP2	cysteine-serine-rich nuclear protein 2	Nucleus	transcription regulator	-	-	-	-	-	-
ARMCX1	0.726553	8.73863	5.66055	1.411e-05	0.00059413	3.05769	1	0.122807	8.73863	0.956788	0.349841	0.748581	-6.60271	0	ILMN_1788192	ARMCX1	ILMN_9172	51309	7706142	NM_016608.1	NP_057692.1	4230451	S	1256	CATGGTCTGTCGCTTGGACTCAGCTGTGCAGATGGCTGGGCTAAGACTGT	+	100695454-100695503	0	0	0	ARMCX1	armadillo repeat containing, X-linked 1	unknown	other	0.821008	0.00396029	2	0.0994896	0.710342	X
FAM152B	0.83183	9.75475	7.86294	1.29734e-07	1.54046e-05	7.72296	1	0.422946	9.75475	3.99794	0.000680797	0.0107382	-0.93366	0	ILMN_1737580	FAM152B	ILMN_13640	27351	63055039	NM_015704.1	NP_056519.1	380541	S	418	GGCACAGTTCCTGACTGGGCGGAAGATTCCTTCTTACATCACAGACCTGC	-	40329227-40329276	0	0	0	PPPDE2	PPPDE peptidase domain containing 2	unknown	other	-	-	-	-	-	-
ARNT2	0.708543	7.29608	8.56642	3.32114e-08	5.22833e-06	9.07314	1	0.0737721	7.29608	0.89192	0.382803	0.774013	-6.66263	0	ILMN_1718046	ARNT2	ILMN_13881	9915	68303554	NM_014862.3	NP_055677.3	4180307	S	6151	GGTGCAGGCACATTTCCAAGCGTAGGTGTCCCTGGCTTTTGTGGCCAAAG	+	78676925-78676974	0	0	0	ARNT2	aryl-hydrocarbon receptor nuclear translocator 2	Nucleus	transcription regulator	0.736263	0.00696949	2	0.0392215	0.896898	X
ARRDC3	0.910255	8.06808	5.16347	4.40765e-05	0.00146928	1.92602	1	0.126279	8.06808	0.716327	0.481884	0.833233	-6.80509	0	ILMN_2198515	ARRDC3	ILMN_22538	57561	32698735	NM_020801.1	NP_065852.1	4060672	S	1970	GCCTGGACTTTACCTGCGTATGCACATGCTCAGAATTGTCTACTAGGCTG	-	90702410-90702459	0	0	0	ARRDC3	arrestin domain containing 3	unknown	other	1.11077	0.00447699	2	0.0216519	0.960965	X
DPP7	-0.10799	9.98996	-0.605966	0.5512	0.859249	-6.69436	0	-1.00663	9.98996	-5.64854	1.44997e-05	0.000449564	2.8976	1	ILMN_1811328	DPP7	ILMN_6361	29952	62420887	NM_013379.2	NP_037511.2	670608	A	1245	AGCCGCCAGCAACATCATCTTCTCCAACGGGAACCTGGACCCCTGGGCAG	-	139125970-139126019	0	0	0	DPP7	dipeptidyl-peptidase 7	Cytoplasm	peptidase	-0.2137	0.546888	X	-0.741228	0.0303809	2
DPP7	-0.131453	10.439	-0.562118	0.580141	0.872374	-6.72051	0	-1.08746	10.439	-4.65019	0.000146054	0.00301512	0.589817	1	ILMN_1769135	DPP7	ILMN_6361	29952	62420887	NM_013379.2	NP_037511.2	2140487	A	970	TACAACGCCTCGGGCTCCGAGCACTGCTACGACATCTACCGGCTCTACCA	-	139126445-139126494	0	0	1	DPP7	dipeptidyl-peptidase 7	Cytoplasm	peptidase	-0.2137	0.546888	X	-0.741228	0.0303809	2
ARRDC4	1.05941	7.90556	6.80478	1.14095e-06	8.61341e-05	5.56134	1	0.779252	7.90556	5.00527	6.36359e-05	0.00151122	1.41762	1	ILMN_1660544	ARRDC4	ILMN_162925	91947	34419646	NM_183376.1	NP_899232.1	6580168	S	3348	CTTCTGAGTTATATAGTTCATGCCCTGCCAAGGCATTGTTCGACTCCATG	+	96317363-96317412	0	0	0	ARRDC4	arrestin domain containing 4	unknown	other	1.54124	0.00154952	2	1.49576	0.00127537	2
DPY19L2	0.339607	7.20138	2.74994	0.0121814	0.11143	-3.54905	0	1.07144	7.20138	8.6759	2.70224e-08	2.62698e-06	9.2135	1	ILMN_1801853	DPY19L2	ILMN_5381	283417	93277104	NM_173812.4	NP_776173.3	780386	S	2383	CCTGCTCGAAGACGCCAGGCCTTACTTCACCACAGTATTTCAGAATAGTG	-	62240584-62240633	0	0	0	DPY19L2	dpy-19-like 2 (C. elegans)	unknown	other	0.791026	0.270564	X	2.75414	0.00209122	2
ASB13	1.15393	8.85548	10.9288	5.36825e-10	2.16514e-07	13.1213	1	1.23105	8.85548	11.6592	1.70189e-10	4.21601e-08	14.2636	1	ILMN_1654385	ASB13	ILMN_16322	79754	22208956	NM_024701.2	NP_078977.2	5050575	S	2463	CTTCATGCTGGCCGCCGTGAGGTTTTACTCCAGCGTTCCCGCCATTGTCA	-	5721023-5721072	0	0	0	ASB13	ankyrin repeat and SOCS box containing 13	unknown	other	1.00156	0.00237964	2	1.25845	0.000496243	2
DSC2	0.0666947	8.0389	0.61505	0.545301	0.856815	-6.68871	0	1.02415	8.0389	9.44457	6.62979e-09	8.38205e-07	10.6209	1	ILMN_1663119	DSC2	ILMN_8764	1824	40806176	NM_004949.2	NP_004940.1	2710400	A	5015	AATATGACTATTCTAAAGGCTGTGAGGCCATGGGGTATTGGTTAAGTTGC	-	26900109-26900158	0	0	0	DSC2	desmocollin 2	Plasma Membrane	other	0.266501	0.220542	X	1.29071	0.000200745	2
DSC2	0.0709333	7.74407	0.670063	0.510308	0.838243	-6.65275	0	0.709899	7.74407	6.70598	1.40846e-06	6.6283e-05	5.23983	1	ILMN_2381257	DSC2	ILMN_21438	1824	40806177	NM_024422.2	NP_077740.1	3420100	A	2704	ATGGCTTCACAACCCAAACTGTGGGCGCTTCTGCTCAGGGAGTTTGTGGC	-	26903055-26903104	0	0	0	DSC2	desmocollin 2	Plasma Membrane	other	0.266501	0.220542	X	1.29071	0.000200745	2
DSE	0.843405	10.2773	2.69124	0.0138666	0.122019	-3.67036	0	1.43545	10.2773	4.58042	0.000172102	0.00347063	0.426693	1	ILMN_1706498	DSE	ILMN_14589	29940	124494232	NM_013352.2	NP_037484.1	7210170	S	3756	TCCTTGATGCTGGTCTCTGCACACATATGCTTGGTTACTTGCATGCATTC	+	116865852-116865901	0	0	0	DSE	dermatan sulfate epimerase	Cytoplasm	enzyme	0.674559	0.0534937	X	1.30386	0.00222432	2
DSTN	0.26549	8.29291	1.78827	0.0885491	0.391762	-5.34221	0	0.912016	8.29291	6.14309	4.79037e-06	0.000179279	4.00927	1	ILMN_2380698	DSTN	ILMN_13158	11034	58530846	NM_006870.3	NP_006861.1	3190634	A	1528	AGCTAGGACACCTGTGGTATCTTTAATTGTATCTCCTTCAGAAGTTTGCT	+	17536566-17536615	0	0	0	DSTN	destrin (actin depolymerizing factor)	Cytoplasm	other	0.268297	0.343509	X	0.66629	0.0232006	2
DSTN	0.402279	9.63204	2.39756	0.0261443	0.186398	-4.25739	0	0.838652	9.63204	4.99831	6.46754e-05	0.00153516	1.40144	1	ILMN_1706426	DSTN	ILMN_14931	11034	58530847	NM_001011546.1	NP_001011546.1	6900612	A	1453	TCAGGCACATCATTGGAATACAGGAAGTAGCCCTGCACCTGCCAGTGAGC	+	17536359-17536408	0	0	0	DSTN	destrin (actin depolymerizing factor)	Cytoplasm	other	0.268297	0.343509	X	0.66629	0.0232006	2
ASCL2	1.9696	10.0642	10.1435	1.9669e-09	5.87081e-07	11.8548	1	2.6783	10.0642	13.7933	7.91959e-12	3.5458e-09	17.2716	1	ILMN_1723412	ASCL2	ILMN_162982	430	42716308	NM_005170.2	NP_005161.1	7200435	S	1604	AAGAACCCTTGACCTGGGGCGTAATAAAGATGACCTGGACCCCTGCCCCC	-	2246499-2246548	0	0	0	ASCL2	achaete-scute complex homolog 2 (Drosophila)	Nucleus	transcription regulator	2.4798	0.000172741	2	2.92984	4.15975e-05	2
ASMTL	0.611656	9.26741	4.9876	6.63087e-05	0.00203405	1.52105	1	0.757756	9.26741	6.17894	4.42583e-06	0.000168216	4.08879	1	ILMN_1732615	ASMTL	ILMN_137697	8623	89060607	XM_942506.1	XP_947599.1	1010349	A	1300	GAGTATCAGTGCTTGCTGGAGCTGCACGGCTTCCACCAGGTGCAGGTGGT			0	0	0	ASMTL	acetylserotonin O-methyltransferase-like	unknown	enzyme	0.938596	0.00136586	2	0.899945	0.00116289	2
ASPH	1.20508	7.82999	11.6894	1.62482e-10	8.81048e-08	14.2788	1	0.454476	7.82999	4.40849	0.00025809	0.00483691	0.0245448	0	ILMN_2352934	ASPH	ILMN_182157	444	47419891	NM_032468.2	NP_115857.1	2370450	A	138	CAAAGCATGGAGGACACAAGAATGGGAGGAAAGGCGGACTCTCAGGAACT	-	62759248-62759297	0	0	0	ASPH	aspartate beta-hydroxylase	Cytoplasm	enzyme	1.2956	5.65554e-05	2	0.0033207	0.98866	X
ATF3	1.77242	8.92776	13.0701	2.14167e-11	1.80203e-08	16.2204	1	0.727625	8.92776	5.36561	2.76558e-05	0.000765112	2.25068	1	ILMN_2374865	ATF3	ILMN_182693	467	95102482	NM_001040619.1	NP_001035709.1	4780128	A	1826	CTCCCAGCGTTAACACAAAATCCATGGGCAGTATGATGGCAGGTCCTCTG	+	210860205-210860254	0	1	0	ATF3	activating transcription factor 3	Nucleus	transcription regulator	0.560493	0.00589551	2	0.266358	0.117152	d
ATG4C	-0.853311	8.97238	-4.61057	0.000160314	0.00403855	0.647639	1	-0.865713	8.97238	-4.67758	0.000136951	0.0028623	0.653826	1	ILMN_1700923	ATG4C	ILMN_29828	84938	30410843	NM_032852.2	NP_116241.2	5090291	A	1273	GTCAGCATAAAGGATTTCCCTCTTGAGACATTCCACTGCCCTTCTCCCAA	+	63073085-63073111:63079687-63079709	0	0	0	ATG4C	ATG4 autophagy related 4 homolog C (S. cerevisiae)	Cytoplasm	peptidase	-2.35054	0.000225041	2	-1.41556	0.00212656	2
ATIC	-1.21034	10.0767	-10.5687	9.65546e-10	3.39945e-07	12.5498	1	-1.04273	10.0767	-9.10518	1.22171e-08	1.38979e-06	10.0091	1	ILMN_1673991	ATIC	ILMN_23084	471	39725714	NM_004044.4	NP_004035.2	1770546	S	1671	CGTAGACAGAGCTAAAAGGAGTGGTGTGGCGTACATTGCGGCTCCCTCCG	+	215922199-215922217:215922504-215922534	0	0	0	ATIC	5-aminoimidazole-4-carboxamide ribonucleotide formyltransferase/IMP cyclohydrolase	Cytoplasm	enzyme	-1.55297	0.00040337	2	-1.43541	0.000369007	2
ATL3	0.749689	9.61301	5.08655	5.26807e-05	0.00169363	1.74913	1	0.918674	9.61301	6.23309	3.92829e-06	0.000152513	4.20862	1	ILMN_1751086	ATL3	ILMN_20827	25923	45827805	NM_015459.3	NP_056274.3	1240243	S	1926	AGAACACAACAAGCCCCTACTGATTTCTGGGTTTCTGCCACGGCCACAGG	-	63153293-63153342	0	0	0	ATL3	atlastin GTPase 3	Cytoplasm	other	0.56737	0.0439867	2	0.799932	0.00882038	2
ATM	-0.919459	9.91688	-10.5607	9.7838e-10	3.41049e-07	12.537	1	-0.630275	9.91688	-7.23921	4.58903e-07	2.63941e-05	6.36779	1	ILMN_2370825	ATM	ILMN_162851	472	71902539	NM_000051.3	NP_000042.3	4250008	A	12765	AGGGAGATAATAGCTTTCCCACCCTACTTTGTGCAGGTCATACCTCCCCA	+	107744654-107744703	0	0	0	ATM	ataxia telangiectasia mutated	Nucleus	kinase	-1.2152	0.00154952	2	-1.05871	0.00235693	2
ATP13A3	1.07931	7.54757	9.92686	2.849e-09	7.59764e-07	11.492	1	0.290808	7.54757	2.67469	0.01438	0.119066	-3.8781	0	ILMN_1768895	ATP13A3	ILMN_35513	79572	88967173	XM_931948.1	XP_937041.1	840672	I	1498	GCACACTTAACCTGCTTCGTCAGAGGGTACTTGGCATCACCGGTGCACAG	-	195652506-195652555	0	0	0	ATP13A3	ATPase type 13A3	unknown	transporter	0.470516	0.038525	2	1.23984	0.000242051	X
ATP13A3	1.22824	7.72086	9.97617	2.61737e-09	7.21654e-07	11.5751	1	0.24523	7.72086	1.99184	0.0599012	0.312752	-5.18198	0	ILMN_1663684	ATP13A3	ILMN_31429	79572	113415389	XM_942079.2	XP_947172.1	2510129	I	3924	CAACCGAGACAAACAAGGAGAGTATCGGTTCAGCACCACACAGCCACCGC			0	0	0	ATP13A3	ATPase type 13A3	unknown	transporter	0.470516	0.038525	2	1.23984	0.000242051	X
ATP2C1	0.593283	8.25021	4.57839	0.000172923	0.00430121	0.572891	1	0.806182	8.25021	6.22135	4.03101e-06	0.000155388	4.18268	1	ILMN_1696568	ATP2C1	ILMN_16216	27032	48762684	NM_014382.2	NP_055197.2	780367	I	4400	TCTTTGAGTCATTGTTACTGAGGCAGTTGAGTGTAAGGAGCTGGCTGCAG	+	132204344-132204393	0	0	0	ATP2C1	ATPase, Ca++ transporting, type 2C, member 1	Cytoplasm	transporter	0.949084	0.00154952	2	0.914945	0.0013276	2
DYNLT3	0.344124	9.0079	1.79585	0.0872985	0.389215	-5.33004	0	1.1324	9.0079	5.90955	8.05325e-06	0.000277161	3.48759	1	ILMN_1681890	DYNLT3	ILMN_2720	6990	5730086	NM_006520.1	NP_006511.1	7330044	S	1644	ATTAGGGTACACAGCTGGCCACCAAATGCGAAGTCAATCTGCTACTTAAC	-	37583497-37583546	0	0	0	DYNLT3	dynein, light chain, Tctex-type 3	Cytoplasm	other	0.064901	0.776137	X	1.06616	0.000265611	2
ATP2C1	1.12703	9.23188	6.78859	1.18092e-06	8.83913e-05	5.52707	1	0.799226	9.23188	4.81408	9.94367e-05	0.00219995	0.9725	1	ILMN_2340565	ATP2C1	ILMN_22601	27032	48762688	NM_001001486.1	NP_001001486.1	5080228	A	2138	AGGCTGCAGACATTGGAGTTGCGATGGGCCAGACTGGTACAGATGTTTGC	+	132195533-132195582	0	0	0	ATP2C1	ATPase, Ca++ transporting, type 2C, member 1	Cytoplasm	transporter	0.949084	0.00154952	2	0.914945	0.0013276	2
ATP5A1	-0.680309	12.3536	-8.84213	1.98161e-08	3.4538e-06	9.5835	1	-0.469141	12.3536	-6.09753	5.29861e-06	0.000194863	3.90797	0	ILMN_2341363	ATP5A1	ILMN_6253	498	50345980	NM_004046.4	NP_004037.1	940711	A	1408	TATCGTGAGGTTGCTGCTTTTGCCCAGTTCGGTTCTGACCTCGATGCTGC	-	41920138-41920187	0	0	0	ATP5A1	ATP synthase, H+ transporting, mitochondrial F1 complex, alpha subunit 1, cardiac muscle	Cytoplasm	transporter	-0.76292	0.0270771	2	-0.553849	0.0887366	X
DYRK4	0.0327392	9.29598	0.461529	0.649287	0.900947	-6.77326	0	-1.55792	9.29598	-21.9622	1.05195e-15	3.65312e-12	25.6309	1	ILMN_1681269	DYRK4	ILMN_20487	8798	28827773	NM_003845.1	NP_003836.1	6270382	S	1642	GGCGGAGGTGTCCATGACCTCCCCAGGACAGAGCAAAAACTTCTCCCTCA	+	4593099-4593148	0	0	0	DYRK4	dual-specificity tyrosine-(Y)-phosphorylation regulated kinase 4	Nucleus	kinase	0.0790529	0.842189	X	-1.58916	0.000547493	2
DYSF	-0.530879	8.06336	-3.18069	0.00460353	0.0548758	-2.62658	0	-0.888568	8.06336	-5.32374	3.04497e-05	0.00082556	2.15435	1	ILMN_1810420	DYSF	ILMN_25101	8291	19743938	NM_003494.2	NP_003485.1	4220187	S	6503	GGGCCATCATCCTCTTCATCATCCTCTTCATCCTGCTGCTGTTCCTGGCC	+	71763245-71763294	0	0	0	DYSF	dysferlin, limb girdle muscular dystrophy 2B (autosomal recessive)	Plasma Membrane	other	-0.151344	0.694674	X	-0.374198	0.274521	d
ATP5A1	-0.821721	12.5506	-8.14755	7.41684e-08	9.80912e-06	8.27757	1	-0.46234	12.5506	-4.58421	0.000170572	0.00344833	0.435564	0	ILMN_1764494	ATP5A1	ILMN_6253	498	50345980	NM_004046.4	NP_004037.1	6110674	A	1623	CTTGTCTCATGTCGTCAGCCAGCACCAAGCCTTGTTGGGCACTATCAGGG	-	41918325-41918327:41918468-41918514	0	0	0	ATP5A1	ATP synthase, H+ transporting, mitochondrial F1 complex, alpha subunit 1, cardiac muscle	Cytoplasm	transporter	-0.76292	0.0270771	2	-0.553849	0.0887366	X
ATP5D	-0.73911	10.6495	-3.84846	0.000968809	0.016689	-1.11927	1	-0.67093	10.6495	-3.49346	0.0022298	0.0280823	-2.0945	1	ILMN_1653599	ATP5D	ILMN_6051	513	50345989	NM_001687.4	NP_001678.1	3190671	A	399	AGCAGCGGTTCCATCGCAGTGAACGCCGACTCTTCGGTGCAGTTGTTGGC	+	1195098-1195147	0	0	0	ATP5D	ATP synthase, H+ transporting, mitochondrial F1 complex, delta subunit	Cytoplasm	transporter	-0.675341	0.00588201	2	-0.894437	0.00100867	2
ATP6AP1	-0.913	13.3812	-9.06009	1.32648e-08	2.49428e-06	9.9796	1	-0.416775	13.3812	-4.13584	0.000491461	0.00821099	-0.612499	0	ILMN_1697694	ATP6AP1	ILMN_42218	537	89353296	NM_001183.4	NP_001174.2	6590201	S	2028	CGGGAGTGCCGGGCAGGAGCATGGGGTGCTTGGTTGTTTCCTTCCTAATA	+	153317985-153318034	0	0	0	ATP6AP1	ATPase, H+ transporting, lysosomal accessory protein 1	Cytoplasm	transporter	-0.414204	0.0118632	2	-0.0905645	0.577841	X
ATP6V0A1	-1.06142	11.8178	-8.17485	7.03354e-08	9.40413e-06	8.33017	1	-0.700967	11.8178	-5.39871	2.56332e-05	0.000721009	2.32671	1	ILMN_1752579	ATP6V0A1	ILMN_28612	535	77539781	NM_005177.3	NP_005168.2	1660215	S	3986	GCCCTGGTGTCCTGGGTTTTCGTGATGATCTTTGCTCTGTTTCCAGTGGG	+	37927987-37928036	0	0	0	ATP6V0A1	ATPase, H+ transporting, lysosomal V0 subunit a1	Cytoplasm	transporter	-0.747246	0.0151351	2	-0.525938	0.0622862	d
B4GALT5	1.05232	10.3519	4.2883	0.000342785	0.00740203	-0.10134	1	0.907659	10.3519	3.6988	0.00137812	0.0190094	-1.62545	1	ILMN_1685824	B4GALT5	ILMN_5773	9334	13929470	NM_004776.2	NP_004767.1	2060047	S	4331	CCTCTTGTCAGAGATCCTCTACCACAGACATTAATAGCTGAGCAGGAGCC	-	47683153-47683202	0	0	0	B4GALT5	UDP-Gal:betaGlcNAc beta 1,4- galactosyltransferase, polypeptide 5	Cytoplasm	enzyme	0.890202	0.0107722	2	0.435593	0.157964	d
BAG3	2.08002	9.08121	10.2743	1.57684e-09	4.99695e-07	12.071	1	0.794295	9.08121	3.92345	0.000811728	0.01236	-1.10665	1	ILMN_1659766	BAG3	ILMN_177775	9531	62530382	NM_004281.3	NP_004272.2	1340075	S	2278	TTCTGCAGCCCTGTCTACTTGGGCACCCCCACCACCTGTTAGCTGTGGTT	+	121427028-121427077	0	0	1	BAG3	BCL2-associated athanogene 3	Cytoplasm	other	2.10487	0.00120594	2	0.963026	0.0409916	2
ECHDC3	-0.539979	8.85531	-3.39103	0.00283088	0.0379123	-2.15955	0	-0.696196	8.85531	-4.37205	0.000281266	0.00519347	-0.0606682	1	ILMN_2072178	ECHDC3	ILMN_30194	79746	31542717	NM_024693.2	NP_078969.2	5220612	S	1408	AGCAAAAGGTGGCAACCCATGGAGGCAGAAAGAAGGACGCCAGCCTGACC	+	11845852-11845901	0	0	0	ECHDC3	enoyl CoA hydratase domain containing 3	Cytoplasm	enzyme	-0.673763	0.045746	X	-0.855204	0.0155778	2
BANP	0.823726	11.4479	5.22158	3.85349e-05	0.00132941	2.05936	1	0.284255	11.4479	1.80189	0.0863137	0.387265	-5.50061	0	ILMN_1663631	BANP	ILMN_8638	54971	109698608	NM_079837.2	NP_524576.2	380373	A	2006	GAGCCCTTTGCTGTGTGCTCTGTCCAGTGTCATGAGACGGGAGCCCTTTG	+	86668146-86668195	0	0	0	BANP	BTG3 associated nuclear protein	Nucleus	other	1.09256	0.00555091	2	0.225895	0.524153	X
BANP	0.790387	9.58842	4.25193	0.00037354	0.00793967	-0.185812	1	0.198149	9.58842	1.06595	0.298859	0.705609	-6.49326	0	ILMN_1701216	BANP	ILMN_8638	54971	109698608	NM_079837.2	NP_524576.2	3780450	A	1825	TTTCGTTTGAGTCCTGCTGTTGGTGTCGGAGCACGAGGGGAGGCACGGTG	+	86667965-86668014	0	0	0	BANP	BTG3 associated nuclear protein	Nucleus	other	1.09256	0.00555091	2	0.225895	0.524153	X
EEF2	-0.352796	12.6473	-4.18516	0.000437382	0.0090178	-0.340809	0	-0.814192	12.6473	-9.65864	4.5415e-09	6.07217e-07	10.9991	1	ILMN_1738383	EEF2	ILMN_163595	1938	83656775	NM_001961.3	NP_001952.1	1580292	S	3005	TGGGTACATGGCCCGCAGTGGCTTTTGCCCCAGAAAGGGGAAAGGAACAC	-	3927157-3927206	0	0	0	EEF2	eukaryotic translation elongation factor 2	Cytoplasm	translation regulator	-0.485914	0.0456146	X	-1.10252	0.00071067	2
BCAT1	1.28995	9.28943	4.62113	0.00015638	0.00395833	0.672175	1	1.01032	9.28943	3.61938	0.00166063	0.0220582	-1.80754	1	ILMN_1766169	BCAT1	ILMN_30343	586	72187658	NM_005504.4	NP_005495.2	7650524	S	7557	GGAGCTGGGGCTCAACCCACTGTTTTTAAGGATTTGCGCTTACTTGTGGC	-	24856129-24856178	1	0	0	BCAT1	branched chain amino-acid transaminase 1, cytosolic	Cytoplasm	enzyme	1.58191	0.00997005	2	1.28884	0.0232405	2
BCL2L2	0.862127	9.26377	8.53351	3.53463e-08	5.52876e-06	9.01151	1	-0.0193423	9.26377	-0.191454	0.850057	0.966753	-7.04989	0	ILMN_1746561	BCL2L2	ILMN_181356	599	14574571	NM_004050.2	NP_004041.1	5050156	S	3247	AGGGACTTTGTTTAGGCCAAGGAAGGAGCGGAAGTAGGGCAACTCGGTCC	+	22850505-22850554	0	0	1	BCL2L2	BCL2-like 2	Cytoplasm	other	0.568709	0.0329007	2	-0.0844532	0.785619	X
EFNB2	0.554355	7.5071	4.13199	0.000495957	0.00994358	-0.464152	0	1.11523	7.5071	8.31255	5.38982e-08	4.5429e-06	8.5206	1	ILMN_1703852	EFNB2	ILMN_3827	1948	33359689	NM_004093.2	NP_004084.1	5090289	S	3978	GCTACAGCTTGTTTAACGGCAGTGTCATTCCCCTTTGCACTGTAATGAGG	-	105940388-105940437	0	0	0	EFNB2	ephrin-B2	Plasma Membrane	other	0.82602	0.00677951	X	0.995538	0.002085	2
BCL3	1.2791	10.0874	4.81757	9.86286e-05	0.00273496	1.12786	1	1.36522	10.0874	5.14194	4.633e-05	0.00117036	1.73462	1	ILMN_1710514	BCL3	ILMN_17874	602	20336471	NM_005178.2	NP_005169.1	6330725	S	1617	CTGTCCGGAATGCCACCCACATCTTCCATTTCCATGTCCCCTCCCAGAGC	+	49954947-49954996	0	1	0	BCL3	B-cell CLL/lymphoma 3	Nucleus	transcription regulator	0.402857	0.0488653	2	0.391023	0.0539209	d
BCL6	1.00642	10.6278	5.77171	1.09753e-05	0.000488703	3.30761	1	1.88295	10.6278	10.7985	6.62784e-10	1.299e-07	12.9167	1	ILMN_1737314	BCL6	ILMN_540	604	21040323	NM_001706.2	NP_001697.2	6280458	A	3306	ATGGGCGAGCGTGCACCATCCCTTTTTGAAGTGTAGGCAGACACAGGGAC	-	188922032-188922081	0	0	0	BCL6	B-cell CLL/lymphoma 6	Nucleus	transcription regulator	0.88308	0.0228128	2	1.7684	0.000543343	2
FKBP9L	0.619945	8.87421	4.82088	9.78669e-05	0.00272453	1.13553	1	1.45485	8.87421	11.3134	2.91212e-10	6.67218e-08	13.7323	1	ILMN_2089977	FKBP9L	ILMN_163240	360132	33469942	NM_182827.1	NP_878247.1	5700451	S	2180	AGCTGCTGCAAGACAGCAATGACAGTCCACCTGCCGGCCTGATTCCTGCA	-	55716482-55716531	0	0	0	FKBP9L	FK506 binding protein 9-like	unknown	other	-	-	-	-	-	-
FLJ20489	0.896029	8.99658	3.52239	0.00208408	0.0298436	-1.86374	1	-0.950298	8.99658	-3.73572	0.00126349	0.017683	-1.54052	1	ILMN_1778144	FLJ20489	ILMN_25017	55652	8923451	NM_017842.1	NP_060312.1	2900139	S	1579	CCAGCCCTGCGTTTCCATTCTGCCTTCTCAGAGTGCCCTTGCTGCACCCA	+	46461372-46461421	0	0	0	SLC48A1	solute carrier family 48 (heme transporter), member 1	unknown	other	-	-	-	-	-	-
FLJ21865	0.608132	9.09048	3.91859	0.000821085	0.0147481	-0.957739	1	-0.839076	9.09048	-5.40671	2.5167e-05	0.000709531	2.34509	1	ILMN_1815366	FLJ21865	ILMN_20558	64772	12232428	NM_022759.1	NP_073596.1	430390	S	2410	TTGTGGGGGGCGCAGCATCCACGCCTTGCTGCCCTTCTTTCATGAAGTCT	+	74595958-74596007	0	0	0	ENGASE	endo-beta-N-acetylglucosaminidase	unknown	enzyme	-	-	-	-	-	-
FLJ37453	0.30103	7.64263	1.7351	0.0977583	0.413379	-5.4265	0	0.742804	7.64263	4.28144	0.000348379	0.00619141	-0.272517	1	ILMN_1769571	FLJ37453	ILMN_182383	645580	113411967	XM_001134344.1	XP_001134344.1	4120041	S	973	GGCATTTAGCAGGTGCTTCTCCGCGACCGAGCGACTGCCATTTTGTGGTG			0	0	0	FLJ37453	hypothetical LOC729614	unknown	other	-	-	-	-	-	-
FLJ40448	0.184872	8.00959	2.1047	0.0478626	0.275208	-4.80418	0	0.72181	8.00959	8.21756	6.47443e-08	5.31928e-06	8.33648	1	ILMN_1764029	FLJ40448	ILMN_172999	339059	32699029	NM_182605.1	NP_872411.1	7550082	S	1771	AGGGAGCCCATGGGGAATGGACTATTCTTGCCACCCCTATCCATGGCAGG	+	87339291-87339340	0	0	0	FLJ40448	hypothetical protein FLJ40448	unknown	other	-	-	-	-	-	-
BCS1L	-0.64411	8.42601	-7.87439	1.26823e-07	1.51696e-05	7.74549	1	-0.471216	8.42601	-5.76073	1.12506e-05	0.00036313	3.15205	0	ILMN_1738529	BCS1L	ILMN_162682	617	119964729	NM_001079866.1	NP_001073335.1	7100131	S	1210	ACTGGCAGCTGACCCAGATGTTCCAGAGGTTCTATCCAGGGCAGGCACCT	+	219236166-219236215	0	0	0	BCS1L	BCS1-like (S. cerevisiae)	Cytoplasm	other	-0.818848	0.0123	2	-0.680575	0.025887	X
BIN1	-1.02024	9.17804	-8.00849	9.73383e-08	1.22116e-05	8.00801	1	-1.18928	9.17804	-9.33544	8.05718e-09	9.88551e-07	10.4258	1	ILMN_2309245	BIN1	ILMN_22961	274	21536399	NM_139343.1	NP_647593.1	650553	A	2262	AGGGGCGTTCTCCCAAAGATTAGGTCGTTTTCCAAAGAGCCGCGTCCCGG	-	127522387-127522436	0	0	1	BIN1	bridging integrator 1	Nucleus	other	-0.937428	0.0193193	2	-1.39718	0.00228776	2
EIF2A	-0.373432	9.99293	-2.46162	0.0228159	0.16989	-4.13237	0	-0.771086	9.99293	-5.08291	5.31281e-05	0.00130881	1.59782	1	ILMN_1733305	EIF2A	ILMN_28727	83939	83656780	NM_032025.3	NP_114414.2	5820068	S	1536	CAGATTTGGCACCTACTCCTGCCCCACAGAGCACACCACGAAACACTGTC	+	151782117-151782166	0	0	0	EIF2A	eukaryotic translation initiation factor 2A, 65kDa	Cytoplasm	translation regulator	-0.651098	0.0144591	X	-1.04994	0.00102199	2
BIN1	-0.976552	9.63595	-5.85133	9.17576e-06	0.000424451	3.48581	1	-1.44974	9.63595	-8.68659	2.64859e-08	2.58513e-06	9.23361	1	ILMN_1674160	BIN1	ILMN_23880	274	21536406	NM_139346.1	NP_647596.1	5130440	A	2045	GTGTTCCTGAAGCTGCTGTGTCCTCTAGTTGAGTTTCTGGCGCCCCTGCC	-	127522316-127522365	0	0	0	BIN1	bridging integrator 1	Nucleus	other	-0.937428	0.0193193	2	-1.39718	0.00228776	2
BIRC3	0.705917	10.4857	5.11416	4.94118e-05	0.00161074	1.81267	1	-0.119339	10.4857	-0.864576	0.397292	0.784831	-6.68673	0	ILMN_2405684	BIRC3	ILMN_4117	330	33946284	NM_182962.1	NP_892007.1	3060255	A	2400	GTGGTGGTATGTGCCTGTAGTCCCAGGCTGAGGCAAGAGAATTACTTGAG	+	101713406-101713455	0	1	1	BIRC3	baculoviral IAP repeat containing 3	Cytoplasm	enzyme	1.37564	0.0151668	2	-0.0443842	0.950436	X
EIF2S3	-0.428145	10.8856	-3.2545	0.00388393	0.0482384	-2.46371	0	-0.625639	10.8856	-4.75573	0.000114002	0.00246283	0.836354	1	ILMN_1665717	EIF2S3	ILMN_24945	1968	83656782	NM_001415.3	NP_001406.1	2850440	S	2333	TTCTCCCCTTGCTCTTCCTGGCCTGAAACACGGGAAACCAGAGTCAAAAG	+	24005716-24005765	0	0	0	EIF2S3	eukaryotic translation initiation factor 2, subunit 3 gamma, 52kDa	Cytoplasm	translation regulator	-0.762669	0.00226164	X	-0.724915	0.00219873	2
BMP2	0.992059	7.45963	16.6357	2.31382e-13	4.90952e-10	20.4356	1	1.0159	7.45963	17.0355	1.46841e-13	1.62866e-10	21.0945	1	ILMN_1722718	BMP2	ILMN_169022	650	80861484	NM_001200.2	NP_001191.1	4280577	S	1726	TTGTGGCTCCCCCGGGGTATCACGCCTTTTACTGCCACGGAGAATGCCCT	+	6707486-6707535	0	0	0	BMP2	bone morphogenetic protein 2	Extracellular Space	growth factor	2.76071	0.000107308	2	3.39875	2.30198e-05	2
EIF3D	-0.173006	11.2026	-1.69289	0.105646	0.431179	-5.49209	0	-0.868365	11.2026	-8.49705	3.7878e-08	3.42939e-06	8.87468	1	ILMN_1739847	EIF3D	ILMN_29417	8664	83367070	NM_003753.3	NP_003744.1	5050669	S	1689	CCTCAAGGACCCCAACAAGCAGGTCATCCGTGTCTACAGCCTCCCTGATG	-	35237555-35237604	0	0	0	EIF3D	eukaryotic translation initiation factor 3, subunit D	Cytoplasm	translation regulator	-0.440528	0.0217593	X	-0.634971	0.00316328	2
EIF3E	-0.215853	12.3824	-1.11903	0.276089	0.676468	-6.2526	0	-0.643456	12.3824	-3.33582	0.00321793	0.0377867	-2.45014	1	ILMN_1739257	EIF3E	ILMN_24442	3646	83656779	NM_001568.2	NP_001559.1	2510019	S	1316	AGCAGGTCAGAGGCTCCTAACTGGGCAACTCAAGATTCTGGCTTCTACTG	-	109283290-109283328:109284388-109284398	0	0	0	EIF3E	eukaryotic translation initiation factor 3, subunit E	Cytoplasm	translation regulator	-0.32392	0.176388	X	-0.585678	0.0215929	2
BMP6	1.20522	7.35725	12.7279	3.48215e-11	2.69739e-08	15.7573	1	0.221215	7.35725	2.33618	0.0297512	0.198539	-4.55206	0	ILMN_1747650	BMP6	ILMN_175517	654	133930782	NM_001718.4	NP_001709.1	6980064	S	2604	AATGAGGGTGCCCAGCTTATAAGAATGGTGTTAGGGGGATGAGCATGCTG	+	7826459-7826508	0	0	0	BMP6	bone morphogenetic protein 6	Extracellular Space	growth factor	3.00363	7.16035e-05	2	0.401097	0.295471	X
EIF3M	-0.185844	10.2339	-1.13757	0.268442	0.668243	-6.23216	0	-0.593069	10.2339	-3.63026	0.0016188	0.0216145	-1.78265	1	ILMN_2192693	EIF3M	ILMN_19862	10480	52851442	NM_006360.3	NP_006351.2	1980564	S	426	TTAAAGTGGCAGCATCTTGTGGGGCCATCCAGTACATCCCAACTGAGCTG	+	32567202-32567251	0	0	0	EIF3M	eukaryotic translation initiation factor 3, subunit M	unknown	other	-0.417441	0.0617413	X	-0.403192	0.0696795	d
BNIP3L	1.3057	10.1783	7.67294	1.89577e-07	2.04685e-05	7.34636	1	0.407647	10.1783	2.39554	0.026256	0.18188	-4.43743	0	ILMN_1718961	BNIP3L	ILMN_13842	665	47078259	NM_004331.2	NP_004322.1	2640192	S	2795	GTGCATTGTGCTCTTTCCAAGTTCAGCAGCAGTTCTATCAGTGGTGCCAC	+	26325856-26325905	0	0	1	BNIP3L	BCL2/adenovirus E1B 19kDa interacting protein 3-like	Cytoplasm	other	1.09476	0.00202694	2	0.242796	0.384038	X
EIF4E3	-0.360686	9.01009	-3.7668	0.00117437	0.0194152	-1.30683	0	-0.616229	9.01009	-6.43555	2.52326e-06	0.000106523	4.65354	1	ILMN_2225144	EIF4E3	ILMN_21239	317649	60685217	NM_173359.3	NP_775495.1	3390221	S	2306	TCTGCTTATGGAAGTTGTGCCCTTCACTTGGTTAGTAACCACCTCAGCCA	-	71814976-71815025	0	0	0	EIF4E3	eukaryotic translation initiation factor 4E family member 3	Cytoplasm	translation regulator	-0.677155	0.0114354	X	-0.948523	0.00170125	2
BRI3	-0.707042	12.2101	-4.06773	0.0005773	0.0111669	-0.613051	1	-0.733455	12.2101	-4.21969	0.000403113	0.0069712	-0.416802	1	ILMN_1781580	BRI3	ILMN_27636	25798	48928020	NM_015379.3	NP_056194.1	6270095	S	426	TCCCCTTTGGGTTCATTTGCTGTTTTGCCTTGAGGAAGCGACGATGCCCC	+	97758418-97758467	0	0	0	BRI3	brain protein I3	unknown	other	-0.669414	0.0110161	2	-0.987196	0.00120715	2
BTBD11	1.63868	8.40727	5.99585	6.64159e-06	0.000331753	3.8075	1	3.68753	8.40727	13.4925	1.19168e-11	4.76693e-09	16.8738	1	ILMN_1705066	BTBD11	ILMN_506	121551	65786574	NM_152322.2	NP_689535.2	6510608	A	2536	CTGTCACCTTCCTCCTCCCACTTCTGTATCCTCAGAGATGCTGCGTGGAT	+	106577350-106577399	0	0	0	BTBD11	BTB (POZ) domain containing 11	Nucleus	transcription regulator	2.44188	0.00524546	2	4.51028	0.000151323	2
ELMO1	-0.349745	9.02752	-2.27615	0.033718	0.219987	-4.48922	0	-0.666161	9.02752	-4.33538	0.000306704	0.00558004	-0.14642	1	ILMN_1784320	ELMO1	ILMN_33356	9844	86787650	NM_014800.9	NP_055615.8	2750154	A	3352	AGCGTTTGGTGTTACCTTCTCCTGGGAGGTCCTGCTGCAACTCAAGTTCC	-	36860770-36860819	0	0	0	ELMO1	engulfment and cell motility 1	Cytoplasm	other	-0.0553659	0.866048	X	-0.379426	0.149589	d
BTG2	1.1755	10.1349	6.24513	3.82563e-06	0.000219882	4.35669	1	0.829828	10.1349	4.40866	0.000257984	0.00483691	0.024951	1	ILMN_1770085	BTG2	ILMN_9681	7832	28872718	NM_006763.2	NP_006754.1	1010487	S	2218	CCAAACACTCTCCCTACCCATTCCTGCCAGCTCTGCCTCCTTTTCAACTC	+	201544859-201544908	0	1	0	BTG2	BTG family, member 2	Nucleus	transcription regulator	1.00862	0.00133813	2	1.12089	0.00049133	2
EML4	0.0103418	9.53786	0.0616387	0.951449	0.989702	-6.88127	0	1.2719	9.53786	7.5807	2.28305e-07	1.49755e-05	7.06993	1	ILMN_1718297	EML4	ILMN_21821	27436	19923496	NM_019063.2	NP_061936.2	110139	S	5166	GTGATCAGCAGGGAGTTTATTTGAGGACATCAGTCACCTTTGGGGTTGCC	+	42412835-42412884	0	0	0	EML4	echinoderm microtubule associated protein like 4	Cytoplasm	other	0.0821028	0.871437	X	1.15839	0.00988322	2
BTG3	1.22075	9.58449	6.61864	1.69851e-06	0.000115126	5.1652	1	1.71584	9.58449	9.3029	8.54202e-09	1.02425e-06	10.3674	1	ILMN_1707339	BTG3	ILMN_27215	10950	28872721	NM_006806.3	NP_006797.3	4920053	S	833	CAGTGACATGGGTACCTCCTCCTGGAATGCATTGTGACCGGAATCACTGG	-	17888312-17888361	0	0	0	BTG3	BTG family, member 3	Nucleus	other	1.09742	0.000646638	2	1.86156	2.60457e-05	2
FREQ	0.522196	8.39133	3.77871	0.0011419	0.0189999	-1.27952	0	0.689048	8.39133	4.98608	6.65434e-05	0.00157109	1.37303	1	ILMN_1756784	FREQ	ILMN_163950	23413	17738307	NM_014286.2	NP_055101.2	7160142	S	4133	ACCACATTTCTGGCAGCGTTTCCCAGACACCCCTCTGCTAGGCCATCCCT	+	132038546-132038595	0	0	0	NCS1	neuronal calcium sensor 1	Cytoplasm	other	-	-	-	-	-	-
BTK	-1.0938	10.0856	-9.44916	6.57576e-09	1.46534e-06	10.6707	1	-0.27196	10.0856	-2.34941	0.0289369	0.194488	-4.52666	0	ILMN_1662026	BTK	ILMN_28021	695	4557376	NM_000061.1	NP_000052.1	6380161	S	2401	TTAGGAGGGAGGATGTAAATAGCCGCACAAAGGGGTCCAACAGCTCTTTG	-	100491221-100491270	0	0	1	BTK	Bruton agammaglobulinemia tyrosine kinase	Cytoplasm	kinase	-1.3274	0.000162605	2	-0.450288	0.0277649	X
EMR3	-0.045125	7.23035	-0.707817	0.487042	0.826163	-6.62637	0	1.94817	7.23035	30.5584	1.48094e-18	1.78434e-14	31.1566	1	ILMN_2348487	EMR3	ILMN_171293	84658	23397637	NM_032571.2	NP_115960.1	1030209	A	2313	TACTTCCCAAGCTGTTTGTTCTCCACAATAGGCTCTCAACAAATGTGTGG	-	14591069-14591118	0	0	0	EMR3	egf-like module containing, mucin-like, hormone receptor-like 3	Plasma Membrane	G-protein coupled receptor	-0.00549089	0.990451	X	4.84635	1.97015e-06	2
ENAH	0.329723	7.10489	6.22293	4.01707e-06	0.000226637	4.30807	0	0.58585	7.10489	11.0569	4.37165e-10	9.44696e-08	13.3297	1	ILMN_1716552	ENAH	ILMN_13056	55740	56549692	NM_018212.4	NP_060682.2	3170132	A	12874	CTGGCCCTGTCACTGTGGTGGATCAGTGGACCTGCTGAAGTCACTGGACT	-	223741342-223741391	0	0	0	ENAH	enabled homolog (Drosophila)	Plasma Membrane	other	4.3983	1.52673e-05	X	5.10586	4.05405e-06	2
FTHL11	0.250318	11.5568	1.23028	0.232548	0.6296	-6.12562	0	0.763433	11.5568	3.75216	0.00121555	0.0171736	-1.50267	1	ILMN_1706013	FTHL11	ILMN_16343	2503	56912195	NR_002204.1		6180070	S	777	GGGTGCCTTCCTTGGTCACCAAGGCAGTGCGTGCACGTTAGGGTTTCCTT	-	82596391-82596440	0	0	0	FTHL11	ferritin, heavy polypeptide 1 pseudogene 11	unknown	other	-	-	-	-	-	-
FTHL12	0.563693	11.3816	2.31279	0.0312422	0.209444	-4.41998	0	0.960591	11.3816	3.94124	0.000778344	0.0119689	-1.06537	1	ILMN_1750278	FTHL12	ILMN_16447	2504	56912200	NR_002205.1		3190133	S	624	GAGCAGGTGAAGCCATCAAAGAATGGGGTGACCACGTGACCAACTTGTGC	-	15517211-15517260	0	0	0	FTHL12	ferritin, heavy polypeptide 1 pseudogene 12	unknown	other	-	-	-	-	-	-
FTHL12	0.282075	12.7333	0.905087	0.375951	0.759438	-6.46643	0	1.02915	12.7333	3.30222	0.0034784	0.0401023	-2.52536	1	ILMN_2073235	FTHL12	ILMN_16447	2504	56912200	NR_002205.1		4730181	S	407	GAAACTGTTGAAGCTGCAGAACCAACGAGGTGGCCGAATCCTTCTTCAGG	-	15517428-15517477	0	0	0	FTHL12	ferritin, heavy polypeptide 1 pseudogene 12	unknown	other	-	-	-	-	-	-
FTHL2	0.636201	10.5501	3.41807	0.00265827	0.0361462	-2.09888	1	0.765001	10.5501	4.11006	0.000522336	0.00862349	-0.672607	1	ILMN_1746525	FTHL2	ILMN_15867	2497	56912194	NR_002200.1		4120039	S	446	CGCCCGAATCTGGCTCGGCGGAATACCTCTTAGACAAGCACACCCTGGGG	+	226890127-226890176	0	0	0	FTHL2	ferritin, heavy polypeptide 1 pseudogene 2	unknown	other	-	-	-	-	-	-
FTHL3P	0.542246	10.2557	2.92581	0.00822355	0.0845608	-3.17883	0	0.942538	10.2557	5.08567	5.27882e-05	0.00130307	1.60423	1	ILMN_2173835	FTHL3P	ILMN_27691	2498	56912190	NR_002201.1		6450139	S	664	ACAAGTGAAGGCCATCAAAGAATTGGGTGACCACGTGACCAACATGCACG	-	27469234-27469283	0	0	0	FTHL3	ferritin, heavy polypeptide 1 pseudogene 3	unknown	other	-	-	-	-	-	-
FTHL8	0.49538	11.8481	1.46791	0.157329	0.524851	-5.82045	0	1.27633	11.8481	3.78204	0.00113299	0.016229	-1.4338	1	ILMN_1696911	FTHL8	ILMN_16227	2501	56912199	NR_002203.1		1980594	S	465	CCAGACTGTGATGACTGGGAGCGGGCTGAATGAGATGGAGTGTGCATTAC	+	146941688-146941737	0	0	0	FTHL8	ferritin, heavy polypeptide 1 pseudogene 8	unknown	other	-	-	-	-	-	-
ENOSF1	-0.305136	8.99067	-2.48578	0.0216668	0.16406	-4.08476	0	-0.766063	8.99067	-6.2407	3.86305e-06	0.000150579	4.22545	1	ILMN_1803676	ENOSF1	ILMN_12398	55556	42544118	NM_017512.2	NP_059982.2	2710358	S	1476	CCTACCGATCAAGATGAGTTCAGCTAGAAGTCATACCACCCTCAGGAATC	-	664166-664215	0	0	0	ENOSF1	enolase superfamily member 1	unknown	other	-0.510669	0.133908	X	-1.11347	0.00513752	2
FVT1	0.0340244	9.44485	0.312675	0.757692	0.937804	-6.83262	0	-1.01448	9.44485	-9.32281	8.24195e-09	1.00305e-06	10.4032	1	ILMN_2154052	FVT1	ILMN_5671	2531	4503816	NM_002035.1	NP_002026.1	1740242	S	1670	GACAGCCCTGTGTTGTGCTCAGGACTCACTCTGCTGCTGGTGGAAACTCA	-	59149381-59149430	0	0	0	KDSR	3-ketodihydrosphingosine reductase	Plasma Membrane	enzyme	-	-	-	-	-	-
ENPP2	0.787286	8.95115	2.2876	0.0329252	0.216661	-4.46764	0	2.24882	8.95115	6.53436	2.03685e-06	8.89906e-05	4.86885	1	ILMN_1780799	ENPP2	ILMN_177018	5168	91823601	NM_001040092.1	NP_001035181.1	840678	S	2603	CCGAAAGACCAGCCGCAGCTACCCAGAAATCCTGACACTCAAGACATACC	-	120638967-120639016	0	0	0	ENPP2	ectonucleotide pyrophosphatase/phosphodiesterase 2	Plasma Membrane	enzyme	1.11154	0.198149	X	3.15974	0.00280065	2
ENPP2	0.641726	8.60189	2.5041	0.0208315	0.160002	-4.04849	0	2.06204	8.60189	8.04635	9.03707e-08	7.04625e-06	8.00149	1	ILMN_2373791	ENPP2	ILMN_177018	5168	91823601	NM_001040092.1	NP_001035181.1	2490152	A	2543	CATGAAGATGCACACAGCTAGGGTGCGTGACATTGAACATCTCACCAGCC	-	120639027-120639076	0	0	0	ENPP2	ectonucleotide pyrophosphatase/phosphodiesterase 2	Plasma Membrane	enzyme	1.11154	0.198149	X	3.15974	0.00280065	2
BTN3A1	-1.03631	8.44195	-5.54639	1.8289e-05	0.000737026	2.79973	1	-1.38297	8.44195	-7.40172	3.2853e-07	1.99415e-05	6.70393	1	ILMN_1802708	BTN3A1	ILMN_2561	11119	85861236	NM_007048.4	NP_008979.3	3130600	I	3202	TAATCCCGTTATGGACTCTGTCTCCAGGAGAGGGGTCTATCCACCCCTGC	+	26523207-26523256	0	0	0	BTN3A1	butyrophilin, subfamily 3, member A1	unknown	other	-0.338483	0.0318018	2	-0.739811	0.000517626	2
ENTPD6	-0.57106	9.57907	-4.08551	0.000553546	0.0108186	-0.571873	0	-1.1031	9.57907	-7.89187	1.22505e-07	8.9902e-06	7.69577	1	ILMN_2091792	ENTPD6	ILMN_17684	955	4557422	NM_001247.1	NP_001238.1	7200215	S	2292	CCGGGCATGAGCTGCTGTAAACTATTTGTGGCTGTGCTGCTTGAGTGACG	+	25154923-25154972	0	0	0	ENTPD6	ectonucleoside triphosphate diphosphohydrolase 6 (putative)	Cytoplasm	enzyme	-0.235527	0.276397	X	-0.317578	0.14215	d
EPAS1	0.0930973	9.9942	0.579033	0.568886	0.867606	-6.71065	0	-0.942867	9.9942	-5.86431	8.91234e-06	0.000300997	3.38584	1	ILMN_1704753	EPAS1	ILMN_26360	2034	41327154	NM_001430.3	NP_001421.2	7610131	S	4595	CCCAGAGCACTTTGCAACTCCCTGGGTAAGAGGGACGACACCTCTGGTTT	+	46466797-46466846	0	0	0	EPAS1	endothelial PAS domain protein 1	Nucleus	transcription regulator	0.178496	0.564086	X	-1.06063	0.00256169	2
EPB41L3	0.535591	12.1238	2.93228	0.00810457	0.0834781	-3.16503	0	1.55	12.1238	8.48603	3.86796e-08	3.46993e-06	8.85366	1	ILMN_2109197	EPB41L3	ILMN_14465	23136	32490571	NM_012307.2	NP_036439.2	1510538	S	3798	GCTGTCTAGGTCCGTCCGGTGTGTCAGATTTTCCTCAGATTAGATGTGCC	-	5382986-5383035	0	0	0	EPB41L3	erythrocyte membrane protein band 4.1-like 3	Plasma Membrane	other	0.361611	0.112037	X	1.46854	0.000129356	2
BTN3A2	-0.963972	8.34469	-5.82534	9.72742e-06	0.000445744	3.42771	1	-1.26107	8.34469	-7.62073	2.1058e-07	1.40201e-05	7.1512	1	ILMN_1676528	BTN3A2	ILMN_29654	11118	76781490	NM_007047.3	NP_008978.2	4610674	S	3377	CAGTTCCCACAGGGCATGTGACTTTGAAAGAGACTAGAGGCCACACTCAG	+	26486092-26486141	0	0	0	BTN3A2	butyrophilin, subfamily 3, member A2	unknown	other	-1.69256	0.000317064	2	-2.52737	2.55775e-05	2
BTN3A3	-0.71821	7.89363	-6.66499	1.53764e-06	0.000107507	5.26428	1	-0.855211	7.89363	-7.93637	1.1219e-07	8.29561e-06	7.78416	1	ILMN_2373831	BTN3A3	ILMN_20851	10384	37574627	NM_197974.1	NP_932078.1	1430717	A	2276	CCCAGGACAGCTGCAGGGTAGAGATCATTTTAAGTGCTTGTGGAGTTGAC	+	26561049-26561098	0	0	0	BTN3A3	butyrophilin, subfamily 3, member A3	unknown	other	-1.82747	0.000511998	2	-2.22456	0.000110391	2
C10orf54	-0.758495	8.91449	-4.38087	0.00027547	0.00623828	0.113798	1	-0.102934	8.91449	-0.594522	0.558679	0.867859	-6.8865	0	ILMN_2205963	C10orf54	ILMN_174163	64115	62339431	NM_022153.1	NP_071436.1	6620292	S	4647	TGTTTGATCCACCCCCTTCCCTGAAAATCCTGGGAGGTTTTATTGCTGCC	-	73177396-73177445	0	0	0	C10orf54	chromosome 10 open reading frame 54	unknown	other	-1.13579	0.0192973	2	-0.0738444	0.899653	X
EPHX1	0.769958	8.65679	2.71446	0.0131751	0.117674	-3.62252	0	-1.08795	8.65679	-3.83553	0.000998806	0.0146027	-1.31025	1	ILMN_1701025	EPHX1	ILMN_5212	2052	4557560	NM_000120.2	NP_000111.1	6900563	S	1538	CTCCTATTCCTACATGGTTCGTGGGGGCCACTTTGCGGCCTTTGAGGAGC	+	224099566-224099615	0	0	0	EPHX1	epoxide hydrolase 1, microsomal (xenobiotic)	Cytoplasm	peptidase	0.701028	0.108693	X	-0.885794	0.0476585	2
C11orf45	-0.672142	8.1428	-5.53778	1.86514e-05	0.000746086	2.78023	1	-0.995951	8.1428	-8.20564	6.62574e-08	5.42532e-06	8.31327	1	ILMN_1680102	C11orf45	ILMN_17734	219833	21450728	NM_145013.1	NP_659450.1	7570025	S	3214	GCCCGTGAGCTTGTGACTGAGTTTCCCAACCTGCCAGGCTCCCATTTGCT	-	128275030-128275079	0	0	0	C11orf45	chromosome 11 open reading frame 45	unknown	other	-1.35947	0.00777732	2	-1.88316	0.00111847	2
C15orf39	0.793914	8.53316	3.86611	0.00092932	0.0161397	-1.07866	1	0.522235	8.53316	2.54312	0.019152	0.146063	-4.14569	0	ILMN_1793729	C15orf39	ILMN_18382	56905	153251858	NM_015492.4	NP_056307.2	870110	S	3585	CTTGCCTAGAGAACACACATGGGCTTTGGAGCCCGACAGACCTGGGCTTG	+	73290721-73290770	0	0	0	C15orf39	chromosome 15 open reading frame 39	unknown	other	0.738728	0.00887252	2	0.51332	0.0408757	X
ERCC1	-0.244476	9.21227	-2.69893	0.0136338	0.120513	-3.65453	0	-0.691777	9.21227	-7.63697	2.03801e-07	1.36245e-05	7.1841	1	ILMN_2377496	ERCC1	ILMN_9100	2067	42544170	NM_001983.2	NP_001974.1	1450356	A	893	CAGTCAGACCCTCCTGACCACATTTGGATCTCTGGAACAGCTCATCGCCG	-	50608821-50608843:50609061-50609087	0	0	0	ERCC1	excision repair cross-complementing rodent repair deficiency, complementation group 1 (includes overlapping antisense sequence)	Nucleus	enzyme	-0.384297	0.0572922	X	-0.871889	0.00100867	2
ERCC1	-0.252339	9.3275	-1.85953	0.077389	0.363912	-5.22635	0	-0.605277	9.3275	-4.4604	0.000228342	0.00438033	0.145978	1	ILMN_2277676	ERCC1	ILMN_9100	2067	42544170	NM_001983.2	NP_001974.1	3840056	I	991	CCCGGAGGCTGTTTGATGTCCTGCACGAGCCCTTCTTGAAAGTACCCTGA	-	50604772-50604772:50604773-50604821	0	1	0	ERCC1	excision repair cross-complementing rodent repair deficiency, complementation group 1 (includes overlapping antisense sequence)	Nucleus	enzyme	-0.384297	0.0572922	X	-0.871889	0.00100867	2
C17orf58	1.37024	8.91906	7.47487	2.82976e-07	2.78424e-05	6.94836	1	0.259288	8.91906	1.41446	0.172261	0.553143	-6.07535	0	ILMN_2398926	C17orf58	ILMN_18190	284018	31795556	NM_181656.1	NP_858042.1	650168	A	1356	GCCTCCCTGCTCCTAGTAATGTATGTTTTGTGCTGAACTGGCAGCTATCC	-	63417774-63417823	0	0	0	C17orf58	chromosome 17 open reading frame 58	unknown	other	1.55678	0.000808799	2	0.741276	0.0247228	X
C17orf58	1.1295	8.54993	7.84428	1.34629e-07	1.58068e-05	7.6862	1	0.376485	8.54993	2.61466	0.0163984	0.130529	-4.00103	0	ILMN_1700515	C17orf58	ILMN_18190	284018	149944658	NM_181656.3	NP_858042.2	3440703	A	939	GGGCTGCTCCTGAGCTCAGTGTCAAGGTGATTCAACTGTAGTGCCAGACA	-	63418254-63418303	0	0	0	C17orf58	chromosome 17 open reading frame 58	unknown	other	1.55678	0.000808799	2	0.741276	0.0247228	X
C17orf58	1.11112	8.65238	7.76627	1.57255e-07	1.78021e-05	7.53199	1	0.480331	8.65238	3.35732	0.00306143	0.0364045	-2.40191	0	ILMN_1712985	C17orf58	ILMN_18190	284018	149944658	NM_181656.3	NP_858042.2	3450176	A	938	TGGGCTGCTCCTGAGCTCAGTGTCAAGGTGATTCAACTGTAGTGCCAGAC	-	63418255-63418304	0	0	0	C17orf58	chromosome 17 open reading frame 58	unknown	other	1.55678	0.000808799	2	0.741276	0.0247228	X
C1orf115	2.50903	7.75489	22.5412	6.30217e-16	2.56299e-12	25.571	1	2.96797	7.75489	26.6643	2.25761e-17	1.3772e-13	28.9482	1	ILMN_1674817	C1orf115	ILMN_30321	79762	121582459	NM_024709.4	NP_078985.3	770564	S	2741	GGGCTGCCCTGGGTTTCTCTTACTCAATCCCTGGAGTGTAAGCATTTGGA	+	218938891-218938940	0	0	0	C1orf115	chromosome 1 open reading frame 115	unknown	other	4.06893	5.73442e-06	2	5.18273	1.97015e-06	2
ERP29	-0.449584	12.4757	-4.03977	0.000616724	0.0117187	-0.677764	0	-1.6889	12.4757	-15.1758	1.32473e-12	8.61991e-10	19.0001	1	ILMN_2323048	ERP29	ILMN_8686	10961	77628150	NM_001034025.1	NP_001029197.1	4120333	A	946	GCTGGTCTGGGGATAGCTGGAGCACTTACTCAGGTGGCTGGTGAAATGAC	+	110945020-110945069	0	0	0	ERP29	endoplasmic reticulum protein 29	Cytoplasm	transporter	-0.388108	0.0777123	X	-1.77636	3.72468e-05	2
GADD45B	1.5393	8.72595	10.6894	7.91849e-10	2.9928e-07	12.7431	1	0.255317	8.72595	1.77301	0.0911128	0.399926	-5.54707	0	ILMN_1718977	GADD45B	ILMN_34297	4616	86991435	NM_015675.2	NP_056490.2	4920110	S	1169	GACCACACTTTGGGACTTGGGAGCTGGGGCTGAAGTTGCTCTGTACCCAT	+	2429063-2429112	0	0	1	GADD45B	growth arrest and DNA-damage-inducible, beta	Cytoplasm	other	-	-	-	-	-	-
C1orf122	0.857329	9.59387	4.04636	0.000607193	0.0115868	-0.662508	1	1.89649	9.59387	8.95092	1.62065e-08	1.70823e-06	9.72606	1	ILMN_1786273	C1orf122	ILMN_26311	127687	38348207	NM_198446.1	NP_940848.1	620433	S	434	AGCCCTGACCATCCCCGAGCAGAATACCCTGACTTCTCTCCCTCCCCAGG	+	38047325-38047374	0	0	0	C1orf122	chromosome 1 open reading frame 122	unknown	other	0.753278	0.0365486	2	2.56	6.00718e-05	2
C1orf162	-1.3173	11.5313	-4.9688	6.92777e-05	0.00209733	1.47764	1	-0.261756	11.5313	-0.987333	0.335009	0.736713	-6.57316	0	ILMN_1754894	C1orf162	ILMN_19455	128346	31341350	NM_174896.2	NP_777556.1	7050719	S	761	CCCTTGGGGGCATAGACTGCCTTCCTTGGACCCTTCCAAAGTGTGTGGTA	+	111822501-111822550	0	0	0	C1orf162	chromosome 1 open reading frame 162	unknown	transporter	-1.31078	0.00853419	2	-0.392995	0.380407	X
C1orf85	-1.06569	11.7849	-7.17084	5.28735e-07	4.54241e-05	6.32675	1	-1.54036	11.7849	-10.3648	1.35484e-09	2.35298e-07	12.2056	1	ILMN_1698243	C1orf85	ILMN_23607	112770	24307870	NM_144580.1	NP_653181.1	2640086	S	1439	GGGACAGGGCTATTGATAAGGTCCCCTTGGTGTTGCCTTCTTGCATCTCC	-	154529204-154529253	0	0	0	C1orf85	chromosome 1 open reading frame 85	Cytoplasm	transcription regulator	-0.89809	0.00101294	2	-1.67529	2.55775e-05	2
GALNAC4S-6ST	1.83297	9.94475	6.34794	3.05399e-06	0.000184001	4.58101	1	1.79406	9.94475	6.2132	4.10395e-06	0.000157454	4.16466	1	ILMN_1670926	GALNAC4S-6ST	ILMN_8597	51363	45505172	NM_015892.2	NP_056976.2	7320041	S	4412	TCTTGCTGACAGAATAGGTTCCGTTCTGGGCGGTGGTTCTCGAGCCTGCC	-	125757392-125757441	0	0	0	CHST15	carbohydrate (N-acetylgalactosamine 4-sulfate 6-O) sulfotransferase 15	Plasma Membrane	enzyme	-	-	-	-	-	-
C1QBP	0.688476	10.1008	4.92378	7.69472e-05	0.00226129	1.37363	1	0.899121	10.1008	6.43025	2.5525e-06	0.000107385	4.64196	1	ILMN_1668996	C1QBP	ILMN_7884	708	28872801	NM_001212.3	NP_001203.1	7200392	S	806	TTGCCGACCGAGGGGTGGACAACACTTTTGCAGATGAGCTGGTGGAGCTC	-	5277130-5277179	0	0	0	C1QBP	complement component 1, q subcomponent binding protein	Cytoplasm	other	0.697093	0.00582236	2	1.24791	0.000198351	2
ETV5	-0.214873	9.03924	-1.06169	0.300747	0.698926	-6.3139	0	1.05045	9.03924	5.19024	4.14293e-05	0.00107171	1.84637	1	ILMN_1739222	ETV5	ILMN_12676	2119	4758315	NM_004454.1	NP_004445.1	770746	I	3817	GGGCATAGGACAGCGGCATCACGGTTGCATTCCCATTGGACTCATGCACC	-	187247011-187247060	0	0	0	ETV5	ets variant 5	Nucleus	transcription regulator	-0.365813	0.391414	X	1.31608	0.00580483	2
GALR1	0.0562809	7.12545	0.403563	0.69072	0.914298	-6.79905	0	0.735113	7.12545	5.27114	3.4371e-05	0.000914599	2.03315	1	ILMN_2151012	GALR1	ILMN_165234	2587	6031165	NM_001480.2	NP_001471.1	1770441	S	2822	ATCATGGGACTGAATATACCTGGGGTATCCTATCTTGTACAAATGCATGC	+	73110846-73110895	0	0	0	GALR1	galanin receptor 1	Plasma Membrane	G-protein coupled receptor	-	-	-	-	-	-
GALR1	0.14503	7.18445	0.668129	0.511517	0.83844	-6.65406	0	1.14293	7.18445	5.26528	3.48381e-05	0.000925514	2.01965	1	ILMN_1763309	GALR1	ILMN_165234	2587	6031165	NM_001480.2	NP_001471.1	4180424	S	2366	GGTGGCATTTGCTTCCAATTGTAGCTAGCGCACAGAGCTTTGGAAGCCTG	+	73110390-73110439	0	0	0	GALR1	galanin receptor 1	Plasma Membrane	G-protein coupled receptor	-	-	-	-	-	-
C1QTNF1	1.99327	8.31496	10.7526	7.14233e-10	2.78848e-07	12.8436	1	2.83029	8.31496	15.2678	1.18184e-12	8.01056e-10	19.1096	1	ILMN_2380237	C1QTNF1	ILMN_17571	114897	38372912	NM_198594.1	NP_940996.1	5090079	A	2568	CCCTAAGTCCCTCTCTTTAAAGAACTTCTGCGGGTCAGACTCTGAAGCCG	+	74557316-74557365	0	0	0	C1QTNF1	C1q and tumor necrosis factor related protein 1	Extracellular Space	other	0.901503	0.00229657	2	0.401039	0.0772892	d
C1QTNF1	0.614539	7.17191	3.50427	0.00217423	0.030845	-1.90471	1	0.194506	7.17191	1.10912	0.280241	0.688448	-6.44706	0	ILMN_1694608	C1QTNF1	ILMN_15620	114897	38372916	NM_198593.1	NP_940995.1	6180719	A	2396	ATAGCCCCTCTCCACCTCACCCCATGTTGATGCCCAGGGTCACTCTTGCT	+	74557157-74557206	0	0	1	C1QTNF1	C1q and tumor necrosis factor related protein 1	Extracellular Space	other	0.901503	0.00229657	2	0.401039	0.0772892	X
EXOSC5	-0.497756	7.98473	-5.00843	6.31695e-05	0.00196607	1.56911	0	-0.664475	7.98473	-6.68597	1.47007e-06	6.89832e-05	5.19677	1	ILMN_1659725	EXOSC5	ILMN_6934	56915	47174863	NM_020158.3	NP_064543.3	2810241	S	692	CTACCGGGAATCGCTGCAGAGGCGTTACTCCAAGAGCTGAGGCAAGCTGG	-	46584367-46584377:46584378-46584416	0	0	0	EXOSC5	exosome component 5	Nucleus	enzyme	-0.717331	0.0883415	X	-0.192878	0.693004	d
C20orf111	0.733238	10.0112	5.53938	1.85836e-05	0.0007451	2.78384	1	0.548294	10.0112	4.14218	0.00048415	0.00811071	-0.597708	0	ILMN_2049727	C20orf111	ILMN_18574	51526	23346408	NM_016470.6	NP_057554.4	2810082	S	910	GAGTCTTCGTGGATGATGTGACCATTGAGGACCTGTCAGGCTACATGGAG	-	42259162-42259211	0	0	0	C20orf111	chromosome 20 open reading frame 111	unknown	kinase	0.826604	0.00500516	2	0.553185	0.0282385	X
C20orf3	-0.709083	10.6026	-6.54344	1.99731e-06	0.000131542	5.00385	1	-0.32286	10.6026	-2.97936	0.00728686	0.0716102	-3.23514	0	ILMN_1674394	C20orf3	ILMN_175446	57136	41327713	NM_020531.2	NP_065392.1	4040204	S	1864	CCAAGACATGGAACTGTGTTCTCAAGGGTTATGTGGGGCGTGGGCTCTCC	-	24891887-24891936	0	0	0	C20orf3	chromosome 20 open reading frame 3	Plasma Membrane	enzyme	-0.927328	0.00834799	2	-0.246227	0.442779	X
GARNL1	0.683552	8.36567	4.39519	0.000266315	0.00607891	0.147083	1	-0.105185	8.36567	-0.676331	0.506403	0.844759	-6.83342	0	ILMN_1741391	GARNL1	ILMN_12338	253959	51226123	NM_014990.1	NP_055805.1	6940465	A	7233	CTTCTTCCCAAAGCAATGTCTCATTTCTTGGCTGTGCAGGTGATGCCATG	-	35077890-35077939	0	0	0	RALGAPA1	Ral GTPase activating protein, alpha subunit 1 (catalytic)	Cytoplasm	other	-	-	-	-	-	-
C20orf72	-0.846824	9.38702	-4.49959	0.00020819	0.00498288	0.389755	1	-0.193624	9.38702	-1.02882	0.315571	0.720445	-6.53169	0	ILMN_2176251	C20orf72	ILMN_24256	92667	19923657	NM_052865.2	NP_443097.1	5960736	S	1752	CGTAACACCAAATAACCCCCCAGAAGTAGCCAGAGGCCAGTTTGAACATC	+	17919387-17919436	0	0	0	C20orf72	chromosome 20 open reading frame 72	Cytoplasm	other	-1.10529	0.0277557	2	-0.45436	0.351636	X
C21orf33	-0.805023	10.5798	-11.0418	4.47776e-10	1.88382e-07	13.2975	1	-0.997957	10.5798	-13.6882	9.12809e-12	3.87364e-09	17.1335	1	ILMN_1737588	C21orf33	ILMN_29537	8209	134142816	NM_198155.2	NP_937798.2	5050376	A	1336	CAGCCACATTTCAGACCTGCTGAGACTGCTGAGTGAGGAATGGCAGTGAG	+	44389795-44389844	0	0	0	C21orf33	chromosome 21 open reading frame 33	Cytoplasm	other	-0.84701	0.0026521	2	-0.99836	0.000798104	2
F13A1	-0.476903	10.6831	-1.19147	0.247103	0.646083	-6.1711	0	-1.54538	10.6831	-3.8609	0.000940803	0.0139046	-1.25156	1	ILMN_1717163	F13A1	ILMN_9687	2162	119395708	NM_000129.3	NP_000120.2	2230241	S	3243	GCTGGCGGATCTAGTGACCAGATATATAGAAGGACTGCAGCCACTGATTC	-	6089880-6089929	0	0	0	F13A1	coagulation factor XIII, A1 polypeptide	Extracellular Space	enzyme	-0.814813	0.308045	X	-1.87322	0.0244864	2
C21orf7	1.18572	7.77179	9.24747	9.4387e-09	1.88782e-06	10.315	1	1.51406	7.77179	11.8082	1.35536e-10	3.4997e-08	14.4884	1	ILMN_1699071	C21orf7	ILMN_9078	56911	31542267	NM_020152.2	NP_064537.1	150315	S	1688	GTGACCTCACAGTAAACATCTCTGCCTTTGCCTGTGTGTGTTCTGGGGGA	+	29469766-29469815	0	0	0	C21orf7	chromosome 21 open reading frame 7	unknown	other	1.76345	0.00543727	2	2.60116	0.00050776	2
C6orf108	-0.802385	10.304	-4.89238	8.27998e-05	0.00240238	1.30103	1	-1.70124	10.304	-10.373	1.33643e-09	2.3293e-07	12.2192	1	ILMN_2380588	C6orf108	ILMN_5240	10591	40354200	NM_199184.1	NP_954653.1	7210484	A	565	GGAGCAGCAGATGGCTCTCGGTTCCAGGTGTGGGACTATGAGGAGGGAGA	-	43301527-43301576	0	0	0	C6orf108	chromosome 6 open reading frame 108	Nucleus	other	-0.865385	0.00940519	2	-1.96097	9.99087e-05	2
C7orf43	-0.595342	8.61456	-4.16372	0.000460122	0.00936009	-0.390563	1	-0.287038	8.61456	-2.00749	0.0580842	0.306709	-5.15475	0	ILMN_1770030	C7orf43	ILMN_1100	55262	34222158	NM_018275.3	NP_060745.3	510255	S	2230	CAAAGTCTCTTCCTCATTCCCGTTGAGTTCTTTCCCACCTCTGACATTCC	-	99590213-99590262	0	0	0	C7orf43	chromosome 7 open reading frame 43	unknown	other	-0.576725	0.0227603	2	-0.108002	0.692878	X
C9orf91	-1.2123	8.9138	-7.02463	7.17339e-07	5.93349e-05	6.02323	1	-1.21774	8.9138	-7.05617	6.71493e-07	3.59322e-05	5.98489	1	ILMN_1803652	C9orf91	ILMN_21211	203197	33356141	NM_153045.2	NP_694590.2	5720131	S	3246	CCCTTGGACAGAAGACTGGCCTACCTAGCAGACCTGGATTTTTCTTCCTG	+	116447348-116447397	0	0	0	C9orf91	chromosome 9 open reading frame 91	Cytoplasm	other	-1.1396	0.000866425	2	-1.13803	0.000557995	2
CABIN1	0.751863	8.12688	6.013	6.39278e-06	0.000322627	3.84551	1	0.159958	8.12688	1.27926	0.215121	0.614692	-6.24941	0	ILMN_1814044	CABIN1	ILMN_11059	23523	22027497	NM_012295.2	NP_036427.1	240424	S	7068	TGACTTTGTAAATCTGCCCACACCCAGCTGGCCATATCCACCCCTCGACG	+	22904442-22904491	0	0	0	CABIN1	calcineurin binding protein 1	Nucleus	other	0.722762	0.0181706	2	0.610074	0.0350532	X
CACNA2D4	0.680989	8.92349	5.70074	1.2883e-05	0.000555894	3.14818	1	1.34224	8.92349	11.2363	3.28805e-10	7.39462e-08	13.612	1	ILMN_1696317	CACNA2D4	ILMN_15285	93589	132566535	NM_172364.4	NP_758952.4	5810221	A	5043	GCCCCCTTACAGCAGAAGACACTGCAGCTCGAAGACAGCTTAAGTGGCAG	-	1771634-1771683	0	0	0	CACNA2D4	calcium channel, voltage-dependent, alpha 2/delta subunit 4	unknown	other	0.871885	0.00106011	2	1.49337	3.89222e-05	2
FAM118A	-0.360958	7.65696	-2.83936	0.00998418	0.096657	-3.36205	0	-0.591533	7.65696	-4.6531	0.000145058	0.00299835	0.596626	1	ILMN_1809147	FAM118A	ILMN_29127	55007	8923587	NM_017911.1	NP_060381.1	6960661	S	1576	TACCTCAGGGACCAGAATCCGTGGGAAGGGATGGACCTGGTGTTCCCGTT	+	44115193-44115242	0	0	0	FAM118A	family with sequence similarity 118, member A	unknown	other	-0.962485	0.0345264	X	-1.08657	0.0190211	2
CALHM2	-1.36823	8.82429	-13.2484	1.66911e-11	1.48101e-08	16.4572	1	-0.421347	8.82429	-4.07986	0.000560991	0.00914411	-0.743006	0	ILMN_1766200	CALHM2	ILMN_19907	51063	39725697	NM_015916.3	NP_057000.2	1440241	S	1602	CTTCTTGGCCAGGGGAAAGGACCACAAGGCAATCTGGGGTGTGGACAGAC	-	105196743-105196792	0	0	0	CALHM2	calcium homeostasis modulator 2	unknown	other	-1.92823	0.000167441	2	-0.464528	0.105944	X
CALM2	-1.05173	11.843	-6.05557	5.81548e-06	0.000297278	3.93973	1	-0.539704	11.843	-3.10747	0.00544465	0.0569081	-2.95654	0	ILMN_1687858	CALM2	ILMN_7659	805	20428653	NM_001743.3	NP_001734.1	7100711	S	857	GTTGTTGAAGTGTGGAGTTGTAACTCTGCGTGGACTATGGACAGTCAACA	-	47241030-47241079	0	0	0	CALM1 (includes others)	calmodulin 1 (phosphorylase kinase, delta)	unknown	other	-1.19072	0.000330514	2	-0.600524	0.00821881	X
FAM127A	0.516182	10.1853	5.45158	2.27091e-05	0.000874015	2.58457	0	0.956553	10.1853	10.1025	2.10901e-09	3.34168e-07	11.7647	1	ILMN_1708143	FAM127A	ILMN_178711	8933	118200334	NM_001078171.1	NP_001071639.1	6040376	S	1002	CCAGAAACCTCTTGTGTTCTTGCCTAGGCCCAGGTGTTCCTGGCAGCCAA	+	133995000-133995049	0	0	0	FAM127A	family with sequence similarity 127, member A	Plasma Membrane	other	0.472328	0.0226682	X	1.11935	0.000213057	2
CAMKK2	-0.644369	7.71439	-4.86938	8.73703e-05	0.0025052	1.24783	1	-0.371412	7.71439	-2.80669	0.010739	0.0958108	-3.60324	0	ILMN_1743021	CAMKK2	ILMN_12935	10645	27437018	NM_153500.1	NP_705720.1	6550382	A	2168	ATGATACGTAAACGCTCCTTTGGGAACCCATTCGAGGGCAGCCGGCGGGA	-	120167361-120167410	0	0	0	CAMKK2	calcium/calmodulin-dependent protein kinase kinase 2, beta	Cytoplasm	kinase	-1.19164	0.0089831	2	-1.48849	0.00237391	X
FAM129B	0.557165	12.2108	2.96636	0.00750429	0.0791213	-3.09212	0	1.94403	12.2108	10.3501	1.38856e-09	2.403e-07	12.1811	1	ILMN_1661755	FAM129B	ILMN_183377	64855	51093862	NM_022833.2	NP_073744.2	3180053	S	3814	CTTCCCTCTTGTCCCGAAGATCTGCGCCTCTAGTGCCTTTTGAGGGGTTC	-	129307524-129307573	0	0	0	FAM129B	family with sequence similarity 129, member B	unknown	other	0.480524	0.0120064	X	1.53457	2.40854e-05	2
CASP5	0.787237	7.5684	5.46423	2.20617e-05	0.000852941	2.61331	1	0.517862	7.5684	3.59449	0.00176044	0.0231322	-1.86445	0	ILMN_1722158	CASP5	ILMN_8232	838	4757913	NM_004347.1	NP_004338.1	3390121	S	1211	GTTCCACAGGCTAAAGCCCAGATGCCCACCATAGAACGAGCAACCTTGAC	-	104371710-104371759	0	0	0	CASP5	caspase 5, apoptosis-related cysteine peptidase	Cytoplasm	peptidase	1.65921	0.000107308	2	1.26742	0.000249669	X
CAT	-0.742163	9.8288	-3.76452	0.00118068	0.0194909	-1.31205	1	-0.957587	9.8288	-4.85723	8.98883e-05	0.00202247	1.0731	1	ILMN_1651705	CAT	ILMN_13962	847	60302919	NM_001752.2	NP_001743.1	4040364	S	1601	GAATGCGATTCACACCTTTGTGCAGTCCGGATCTCACTTGGCGGCAAGGG	+	34449164-34449164:34449491-34449539	0	1	0	CAT	catalase	Cytoplasm	enzyme	-1.18444	0.00294467	2	-0.854448	0.0123052	2
FAM176B	0.123023	8.36806	0.756058	0.458229	0.811645	-6.59066	0	-0.941902	8.36806	-5.78859	1.05658e-05	0.000344906	3.21506	1	ILMN_1769092	FAM176B	ILMN_3804	55194	8922566	NM_018166.1	NP_060636.1	7100561	S	836	ACATGAGCTCAGAGCTACCCCACACCTTCGGACTGCCTCGGCCCCCACAG	-	36560387-36560436	0	0	0	FAM176B	family with sequence similarity 176, member B	unknown	other	0.0484445	0.927524	X	-1.28686	0.00593032	2
FAM20C	-0.275429	8.09777	-0.755622	0.458485	0.811645	-6.59099	0	1.40022	8.09777	3.84141	0.000985066	0.0144321	-1.29666	1	ILMN_1703009	FAM20C	ILMN_5460	56975	116174741	NM_020223.2	NP_064608.2	4830059	A	928	ATCAACCGGTACGAGCTGTACTCCAGACACAACCCGGCCATCGAGGCCCT	+	290728-290777	0	0	0	FAM20C	family with sequence similarity 20, member C	Extracellular Space	other	-1.00188	0.00134575	X	1.04971	0.000685975	2
CCDC134	0.871359	7.53151	10.067	2.24045e-09	6.5472e-07	11.7274	1	0.663217	7.53151	7.66231	1.93671e-07	1.31454e-05	7.23536	1	ILMN_1809883	CCDC134	ILMN_2687	79879	50881951	NM_024821.2	NP_079097.1	2640132	S	842	TCGGGAGGAAGAAGAGGTGGAGGTGTGGTTGTGGTGGAGAGCACCAGCTA	+	40551816-40551865	0	0	0	CCDC134	coiled-coil domain containing 134	unknown	other	1.41619	0.00239379	2	1.37309	0.00211744	2
FAM20C	-0.145287	8.05529	-0.598017	0.556389	0.861577	-6.69924	0	0.811522	8.05529	3.34031	0.00318459	0.0374403	-2.44007	1	ILMN_1683165	FAM20C	ILMN_5460	56975	116174741	NM_020223.2	NP_064608.2	5960376	A	879	GGAGGCGGCCGTGGACTCCTATCCCAACTGGCTCAAGTTCCACATTGGTA	+	290679-290728	0	0	0	FAM20C	family with sequence similarity 20, member C	Extracellular Space	other	-1.00188	0.00134575	X	1.04971	0.000685975	2
FAM46A	-0.475891	11.2592	-2.48529	0.0216893	0.164086	-4.08572	0	-1.28025	11.2592	-6.68597	1.47006e-06	6.89832e-05	5.19678	1	ILMN_1740466	FAM46A	ILMN_12554	55603	117414142	NM_017633.2	NP_060103.2	3940133	S	1591	CAGCCAGTATTCACGTGCCAGCAACAGACCTACTCCACTTGGCTACCCTG	-	82516137-82516186	0	0	0	FAM46A	family with sequence similarity 46, member A	unknown	other	-0.669283	0.0219747	X	-1.50735	0.000268128	2
CCDC50	0.935559	9.67625	8.28298	5.7057e-08	7.9785e-06	8.53748	1	0.643858	9.67625	5.7004	1.28927e-05	0.000407243	3.01539	1	ILMN_2302118	CCDC50	ILMN_12155	152137	33186926	NM_174908.2	NP_777568.1	70603	A	1597	CTCCTGTGTTTGCATTCCTGGGATTTATCCTCAAGTGCATTTCTGACCAT	+	192592329-192592378	0	0	0	CCDC50	coiled-coil domain containing 50	Cytoplasm	other	0.78869	0.013711	2	0.545704	0.0608438	d
FAM65A	-0.159536	10.6681	-0.874922	0.391769	0.770621	-6.49325	0	-1.02731	10.6681	-5.63394	1.49879e-05	0.000461185	2.8644	1	ILMN_1680037	FAM65A	ILMN_17641	79567	39995079	NM_024519.2	NP_078795.2	6480092	S	3975	GGCTTGGCCACCCTGCCGCTGCCCAGCCACATCCCTTGGTTTTGTATTTT	+	66138095-66138144	0	0	0	FAM65A	family with sequence similarity 65, member A	Cytoplasm	other	-0.0192688	0.96141	X	-1.18427	0.0014535	2
CCDC86	-0.760754	8.0993	-5.6415	1.47329e-05	0.000614002	3.01473	1	-0.428971	8.0993	-3.18111	0.00459914	0.0498218	-2.79451	0	ILMN_1792681	CCDC86	ILMN_27103	79080	13129103	NM_024098.1	NP_077003.1	650300	S	1668	GGGAGCAGAGCTTTTCCCTAGCACCCACTTTCCCAAACCAGTCTCTGCAG	+	60374905-60374954	0	0	0	CCDC86	coiled-coil domain containing 86	Nucleus	other	-1.02729	0.00998687	2	-0.383079	0.283571	X
CCL1	1.02287	7.3495	4.81968	9.81411e-05	0.00272905	1.13276	1	1.26635	7.3495	5.96695	7.08373e-06	0.000246929	3.61637	1	ILMN_2086965	CCL1	ILMN_8339	6346	4506832	NM_002981.1	NP_002972.1	1030204	S	122	GGCCGGAAGATGTGGACAGCAAGAGCATGCAGGTACCCTTCTCCAGATGT	-	29713005-29713028:29714218-29714243	0	0	0	CCL1	chemokine (C-C motif) ligand 1	Extracellular Space	cytokine	2.65796	0.00143406	2	3.72164	0.000157805	2
FARP1	-0.152125	8.91978	-0.811633	0.426342	0.792441	-6.54677	0	-0.657119	8.91978	-3.50593	0.00216578	0.0274185	-2.06618	1	ILMN_1678353	FARP1	ILMN_15608	10160	48928036	NM_005766.2	NP_005757.1	7210196	I	4738	AACGCACCCTCTCTGTGGAGCTCTGACTGGTGTAGCTGGAAACAAACAGC	+	97899836-97899885	0	0	0	FARP1	FERM, RhoGEF (ARHGEF) and pleckstrin domain protein 1 (chondrocyte-derived)	unknown	other	-0.0563701	0.854072	X	-0.409782	0.0989591	d
CCL19	0.654357	7.37284	7.71739	1.73402e-07	1.91457e-05	7.43493	1	0.028849	7.37284	0.340241	0.737143	0.933642	-7.00886	0	ILMN_1769129	CCL19	ILMN_10372	6363	22165424	NM_006274.2	NP_006265.1	7100646	S	401	GGACCTCAGCCAAGATGAAGCGCCGCAGCAGTTAACCTATGACCGTGCAG	-	34679800-34679815:34679816-34679836:34679927-34679939	0	0	0	CCL19	chemokine (C-C motif) ligand 19	Extracellular Space	cytokine	1.27142	0.00717158	2	0.148956	0.757643	X
FASN	0.0385654	9.01196	0.185823	0.854413	0.965422	-6.86534	0	-0.724231	9.01196	-3.48962	0.00224987	0.0282985	-2.10321	1	ILMN_1784871	FASN	ILMN_16128	2194	41872630	NM_004104.4	NP_004095.4	5310634	S	8408	GGTAAAAATGCTGCTCTCAGCCTCCCACAATTAAACCGCATGTGATCTCC	-	77629503-77629552	0	1	0	FASN	fatty acid synthase	Cytoplasm	enzyme	0.0901986	0.799504	X	-0.116107	0.740443	d
FAU	-0.386139	12.4952	-4.75088	0.000115306	0.0031141	0.973307	0	-0.762986	12.4952	-9.38745	7.34081e-09	9.06952e-07	10.519	1	ILMN_1664614	FAU	ILMN_3073	2197	71565157	NM_001997.3	NP_001988.1	6770025	S	285	GAGGCCCTGACTACCCTGGAAGTAGCAGGCCGCATGCTTGGAGGTAAAGT	-	64645077-64645084:64645548-64645589	0	0	0	FAU	Finkel-Biskis-Reilly murine sarcoma virus (FBR-MuSV) ubiquitously expressed	Cytoplasm	other	-0.269714	0.0976159	X	-0.459346	0.0107167	2
FBL	-0.584457	9.48039	-3.92723	0.000804513	0.0145092	-0.937814	0	-0.802818	9.48039	-5.39449	2.58823e-05	0.000726628	2.31703	1	ILMN_1719205	FBL	ILMN_14351	2091	12056464	NM_001436.2	NP_001427.2	4880360	S	980	CGTGGTCGTGGGAGTGTACAGGCCACCCCCCAAGGTGAAGAACTGAAGTT	-	45016987-45017017:45017018-45017036	0	0	0	FBL	fibrillarin	Nucleus	other	-0.721381	0.0107772	X	-1.27496	0.000436329	2
FBP1	-0.398618	9.50954	-2.21745	0.0380612	0.238259	-4.59876	0	-0.640729	9.50954	-3.56426	0.00188959	0.0245646	-1.93343	1	ILMN_1728799	FBP1	ILMN_16804	2203	16579887	NM_000507.2	NP_000498.2	6020224	S	1176	CCGACGACGTGCTCGAGTTCCTGAAGGTGTATGAGAAGCACTCTGCCCAG	-	96405486-96405535	0	0	0	FBP1	fructose-1,6-bisphosphatase 1	Cytoplasm	phosphatase	-0.637823	0.106419	X	-0.729127	0.0684324	1
CCL20	5.2959	8.30241	14.3591	3.74446e-12	4.2497e-09	17.8664	1	0.800397	8.30241	2.17017	0.041924	0.249895	-4.86355	0	ILMN_1657234	CCL20	ILMN_1789	6364	4759075	NM_004591.1	NP_004582.1	4220246	S	402	CCTTGCTGGGGTTGGAGGTTTCACTTGCACATCATGGAGGGTTTAGTGCT	+	228390096-228390145	0	0	0	CCL20	chemokine (C-C motif) ligand 20	Extracellular Space	cytokine	6.30622	0.000139256	2	2.57679	0.0102251	X
CCL23	0.831829	7.85745	4.31078	0.000325056	0.00712321	-0.0491072	1	1.54589	7.85745	8.01122	9.6818e-08	7.45254e-06	7.93225	1	ILMN_1764030	CCL23	ILMN_11921	6368	22538805	NM_005064.3	NP_005055.2	5360048	I	209	GCTCTGGAGGAGAAAGATTGGTCCTCAGATGACCCTTTCTCATGCTGCAG	-	31365011-31365060	0	0	0	CCL23	chemokine (C-C motif) ligand 23	Extracellular Space	cytokine	1.31719	0.0202128	2	2.63841	0.000465468	2
CCL23	0.975769	9.13777	3.60261	0.00172722	0.0260241	-1.68178	1	2.52842	9.13777	9.33511	8.06204e-09	9.88551e-07	10.4252	1	ILMN_1686109	CCL23	ILMN_12029	6368	22538807	NM_145898.1	NP_665905.1	6110343	A	436	CTTGTCAAGGTGAAGGGACACAAGTTGCCAGCCACCAACTTTCTTGCCTC	-	31364298-31364347	0	0	0	CCL23	chemokine (C-C motif) ligand 23	Extracellular Space	cytokine	1.31719	0.0202128	2	2.63841	0.000465468	2
FBXO33	0.119477	9.46994	0.937729	0.359319	0.746827	-6.43647	0	0.736274	9.46994	5.77873	1.08033e-05	0.000351482	3.19276	1	ILMN_1664826	FBXO33	ILMN_3703	254170	42558257	NM_203301.1	NP_976046.1	5870202	S	3422	CCTTTTGACAGGTGTGCACTGTTTTGTCTCCAGTGAGCACATACCATGCG	-	38936921-38936970	0	0	0	FBXO33	F-box protein 33	unknown	other	0.15716	0.472776	X	0.570176	0.0124171	2
CCL3	2.07357	11.5815	5.81785	9.89257e-06	0.000452462	3.41096	1	2.22052	11.5815	6.23016	3.95367e-06	0.000153254	4.20215	1	ILMN_1671509	CCL3	ILMN_1999	6348	4506842	NM_002983.1	NP_002974.1	6590682	S	116	CCTCTGCACCATGGCTCTCTGCAACCAGTTCTCTGCATCACTTGCTGCTG	-	31440747-31440756:31441445-31441484	0	0	0	CCL3	chemokine (C-C motif) ligand 3	Extracellular Space	cytokine	1.84635	0.00945709	2	2.2471	0.00291834	2
CCNA1	0.750561	7.42079	7.43087	3.09535e-07	2.96777e-05	6.85919	1	0.954738	7.42079	9.45231	6.53909e-09	8.31044e-07	10.6347	1	ILMN_2157099	CCNA1	ILMN_11325	8900	16306528	NM_003914.2	NP_003905.1	7400279	S	1182	CTTGAGGCGACAAGGAGTGTGCGTCAGGACTGAGAACCTGGCTAAGTACG	+	35912278-35912320:35913255-35913261	0	0	0	CCNA1	cyclin A1	Nucleus	other	1.65053	0.00907664	2	2.45292	0.000908423	2
CCNE1	0.899325	7.70467	10.1423	1.97116e-09	5.87081e-07	11.8527	1	0.720334	7.70467	8.12366	7.77001e-08	6.20609e-06	8.15325	1	ILMN_2384785	CCNE1	ILMN_16108	898	17318560	NM_057182.1	NP_476530.1	870497	A	847	GCAGAGCTGTTGGATCTCTGTGTCCTGGATGTTGACTGCCTTGAATTTCC	+	35004872-35004877:35004987-35005030	1	0	0	CCNE1	cyclin E1	Nucleus	transcription regulator	1.78446	0.000181933	2	1.55353	0.000227969	2
CCNE1	0.95931	7.69916	8.08083	8.44758e-08	1.08489e-05	8.14857	1	0.543828	7.69916	4.58098	0.000171874	0.00346747	0.428008	0	ILMN_1795852	CCNE1	ILMN_16108	898	17318560	NM_057182.1	NP_476530.1	2070131	A	1281	CCTGCTCCACGTTCTCTTCTGTCTGTTGCAGCGGAGGCGTGCGTTTGCTT	+	35006560-35006609	0	0	0	CCNE1	cyclin E1	Nucleus	transcription regulator	1.78446	0.000181933	2	1.55353	0.000227969	X
FCER1G	0.15685	13.6031	0.858096	0.400778	0.777206	-6.50785	0	0.633714	13.6031	3.46694	0.00237218	0.0295776	-2.15464	1	ILMN_2123743	FCER1G	ILMN_26951	2207	4758343	NM_004106.1	NP_004097.1	3850440	S	214	TGTTTACACGGGCCTGAGCACCAGGAACCAGGAGACTTACGAGACTCTGA	+	159455128-159455137:159455295-159455334	0	0	0	FCER1G	Fc fragment of IgE, high affinity I, receptor for; gamma polypeptide	Plasma Membrane	transmembrane receptor	0.164543	0.422271	X	0.749524	0.0022713	2
CCNE1	1.19932	8.0025	7.30802	3.98174e-07	3.60911e-05	6.60882	1	0.879736	8.0025	5.36065	2.79728e-05	0.000770822	2.23927	1	ILMN_2374425	CCNE1	ILMN_6049	898	17318558	NM_001238.1	NP_001229.1	3990026	A	1773	TTGTACCAAGTGGAGCAGGTGGTTGCGGGCAAGCGTTGTGCAGAGCCCAT	+	35006881-35006930	0	0	0	CCNE1	cyclin E1	Nucleus	transcription regulator	1.78446	0.000181933	2	1.55353	0.000227969	2
FCGRT	-0.18661	12.9197	-1.08669	0.289806	0.687976	-6.28752	0	-0.616778	12.9197	-3.59171	0.00177195	0.0232419	-1.87081	1	ILMN_1705302	FCGRT	ILMN_17135	2217	34222296	NM_004107.3	NP_004098.1	4200176	S	1243	TGTGATTCCAGCCACCGCCTGACCATCCGCCATTCCGACTGCTAAAAGCG	+	54721167-54721188:54721189-54721216	0	0	0	FCGRT	Fc fragment of IgG, receptor, transporter, alpha	Plasma Membrane	transmembrane receptor	-0.109465	0.551519	X	-0.508345	0.00804342	2
FCN1	0.0185462	12.8592	0.0687649	0.945844	0.988821	-6.88079	0	-1.26937	12.8592	-4.70652	0.000127954	0.00271134	0.721431	1	ILMN_1668063	FCN1	ILMN_11290	2219	8051583	NM_002003.2	NP_001994.2	6660398	S	1202	CCAGCTCAGTCAAGCCGCCACATGCCCACAACCTCACCAGAGGGAGAATT	-	136941286-136941335	0	0	0	FCN1	ficolin (collagen/fibrinogen domain containing) 1	Extracellular Space	other	0.262856	0.706108	X	-1.62816	0.0135445	2
FCRLB	0.0546905	8.17741	0.542445	0.59337	0.878022	-6.73162	0	1.03599	8.17741	10.2754	1.57395e-09	2.63055e-07	12.0563	1	ILMN_1782015	FCRLB	ILMN_24322	127943	74096444	NM_001002901.2	NP_001002901.1	4730204	S	1556	CACCCTTAGCCCTTCAGATAAGCCTAGCCAGTACATATTTCAGCACAGGC	+	159964345-159964394	0	0	0	FCRLB	Fc receptor-like B	Cytoplasm	other	0.114935	0.80299	X	0.875923	0.0285939	2
CD274	0.826399	7.34896	8.95142	1.61915e-08	2.92659e-06	9.78292	1	0.171803	7.34896	1.86094	0.0771808	0.36371	-5.40395	0	ILMN_1701914	CD274	ILMN_22493	29126	20070268	NM_014143.2	NP_054862.1	4900239	S	1169	GACGCCTGTGACAGGGAGAAAGGATACTTCTGAACAAGGAGCCTCCAAGC	+	5458106-5458155	0	0	0	CD274	CD274 molecule	Plasma Membrane	enzyme	1.48079	0.003755	2	0.258951	0.567029	X
CD36	-0.988825	10.8925	-4.88047	8.51356e-05	0.0024541	1.27348	1	-0.903765	10.8925	-4.46065	0.000228209	0.0043795	0.146556	1	ILMN_1784863	CD36	ILMN_22014	948	48375179	NM_001001548.1	NP_001001548.1	1010592	I	1843	CACCATCATCCCAGTAGCTGCCCTATTCAACTGCAACAGTCTCCAGGACC	+	80143770-80143819	0	0	0	CD36	CD36 molecule (thrombospondin receptor)	Plasma Membrane	transmembrane receptor	-1.72721	0.00161292	2	-0.971029	0.0223134	2
CD36	-0.882251	10.3471	-4.48005	0.000218006	0.00518728	0.344326	1	-0.451117	10.3471	-2.29076	0.03271	0.21132	-4.63864	0	ILMN_1796094	CD36	ILMN_22242	948	48375177	NM_000072.2	NP_000063.2	3310538	A	1520	GTGCCTATTCTTTGGCTTAATGAGACTGGGACCATTGGTGATGAGAAGGC	+	80140638-80140661:80141235-80141260	0	0	0	CD36	CD36 molecule (thrombospondin receptor)	Plasma Membrane	transmembrane receptor	-1.72721	0.00161292	2	-0.971029	0.0223134	X
CD40	0.965727	8.69588	4.46623	0.000225223	0.00532858	0.312216	1	0.963162	8.69588	4.45437	0.00023161	0.00443083	0.131883	1	ILMN_1779257	CD40	ILMN_22820	958	91105420	NM_001250.4	NP_001241.1	6420520	A	843	CATGGATGCCAACCGGTCACCCAGGAGGATGGCAAAGAGAGTCGCATCTC	+	44191018-44191067	0	0	0	CD40	CD40 molecule, TNF receptor superfamily member 5	Plasma Membrane	transmembrane receptor	1.16624	0.00645582	2	1.85132	0.000423209	2
CD44	0.885466	7.97578	7.04148	6.92455e-07	5.76676e-05	6.05836	1	0.9256	7.97578	7.36063	3.57377e-07	2.15317e-05	6.61929	1	ILMN_1778625	CD44	ILMN_6000	960	48255934	NM_000610.3	NP_000601.3	360719	I	1114	CTAGTGCTACAGCAACTGAGACAGCAACCAAGAGGCAAGAAACCTGGGAT	+	35174881-35174930	0	0	0	CD44 (includes EG:100330801)	CD44 molecule (Indian blood group)	Plasma Membrane	other	0.746274	0.00704472	2	1.37319	0.000211355	2
CD44	0.97759	11.127	3.86293	0.000936326	0.0162383	-1.08599	1	1.74817	11.127	6.90787	9.17092e-07	4.68648e-05	5.67136	1	ILMN_2348788	CD44	ILMN_24089	960	48255942	NM_001001392.1	NP_001001392.1	4560193	A	2897	GCCACTCCAGGACAAGGTTCAAAATGGTTACAACAGCCTCTACCTGTCGC	+	35209453-35209502	0	0	0	CD44 (includes EG:100330801)	CD44 molecule (Indian blood group)	Plasma Membrane	other	0.746274	0.00704472	2	1.37319	0.000211355	2
FILIP1L	0.343573	8.59711	1.90655	0.0707181	0.345949	-5.14816	0	1.97375	8.59711	10.9527	5.16583e-10	1.06372e-07	13.1641	1	ILMN_1738578	FILIP1L	ILMN_28977	11259	109659848	NM_014890.2	NP_055705.2	110307	I	2925	CTGACCACGCTCACCCTCATCCAGTCCATACTGATATTTTTGCAAGGAAC	-	101049761-101049807:101049808-101049810	0	0	0	FILIP1L	filamin A interacting protein 1-like	Nucleus	other	0.265872	0.270415	X	2.78309	5.87103e-06	2
FILIP1L	0.286894	8.37231	2.002	0.0587155	0.310116	-4.98529	0	1.61468	8.37231	11.2675	3.12977e-10	7.13733e-08	13.6609	1	ILMN_1730906	FILIP1L	ILMN_171751	11259	109659844	NM_182909.2	NP_878913.2	650458	A	3551	GCGATATTCAGAGTCTCCCCAGACCGGCAGTCATCATGGCAGTTTCAGCG	-	101050072-101050121	0	0	0	FILIP1L	filamin A interacting protein 1-like	Nucleus	other	0.265872	0.270415	X	2.78309	5.87103e-06	2
FILIP1L	0.576751	8.32713	3.51522	0.0021193	0.0302151	-1.87996	0	1.42298	8.32713	8.67288	2.7176e-08	2.63667e-06	9.20781	1	ILMN_2391150	FILIP1L	ILMN_170763	11259	109659846	NM_001042459.1	NP_001035924.1	4490709	A	3674	ATGCAAGCTGTAGCCAGCCCTGTGAGACCTGCCAGCCCTTCAGCACCACT	-	101049949-101049998	0	0	0	FILIP1L	filamin A interacting protein 1-like	Nucleus	other	0.265872	0.270415	X	2.78309	5.87103e-06	2
CD47	-0.796433	9.34593	-5.74517	1.16525e-05	0.000513237	3.24804	1	0.534462	9.34593	3.85541	0.000953082	0.0140521	-1.26428	0	ILMN_1771333	CD47	ILMN_23203	961	68223313	NM_198793.2	NP_942088.1	4150193	A	4793	CTCCAGTGTTGCTATGTGCAAGATCCTCTCTTGGAGCTTTTTTGCATAGC	-	109245076-109245125	0	1	0	CD47	CD47 molecule	Plasma Membrane	other	-0.989573	0.0146079	2	0.625367	0.0887366	X
CD48	0.662418	9.13406	3.25019	0.00392275	0.048613	-2.47325	1	1.16244	9.13406	5.70356	1.28011e-05	0.000404611	3.02255	1	ILMN_2061043	CD48	ILMN_12920	962	21361570	NM_001778.2	NP_001769.2	2030767	S	838	GGACAGAGACTGTATAGGCTGACCAGAAGCATGCTGCTGAATTATCAACG	-	158915342-158915391	0	0	0	CD48	CD48 molecule	Plasma Membrane	other	0.825931	0.00640234	2	0.859919	0.00426979	2
CD80	0.808279	7.63315	5.78032	1.07646e-05	0.000481518	3.3269	1	0.946239	7.63315	6.76693	1.23665e-06	5.95838e-05	5.37067	1	ILMN_1716736	CD80	ILMN_2131	941	113722122	NM_005191.3	NP_005182.1	5390239	S	2481	GCCCATGGCTTTAGCTACCTCACTATGCTGCTTCACAAACCTTGCTCCTG	-	120726056-120726105	0	0	0	CD80 (includes EG:12519)	CD80 molecule	Plasma Membrane	transmembrane receptor	1.18921	0.0146718	2	1.65221	0.00239683	2
FKBP5	0.106221	9.65808	0.612549	0.546921	0.857454	-6.69027	0	1.14582	9.65808	6.60767	1.73905e-06	7.90218e-05	5.02779	1	ILMN_1778444	FKBP5	ILMN_16562	2289	17149847	NM_004117.2	NP_004108.1	2640341	S	3433	CTCAGATGATGCCAGCTGTCTCCCACGTGTGTATTATGGTTCACCAGGGG	-	35649634-35649683	0	0	1	FKBP5	FK506 binding protein 5	Nucleus	enzyme	0.0738549	0.84233	X	0.975031	0.00545947	2
CD82	0.960196	9.53512	6.09578	5.31908e-06	0.000276151	4.02855	1	1.97696	9.53512	12.5507	4.49724e-11	1.40186e-08	15.5744	1	ILMN_2392274	CD82	ILMN_24367	3732	67782353	NM_001024844.1	NP_001020015.1	2340768	A	1248	GGCGCAGGTGGGCTGGACTTCTACCTGCCCTCAAGGGTGTGTATATTGTA	+	44597523-44597572	0	0	0	CD82	CD82 molecule	Plasma Membrane	other	1.14677	0.0056425	2	2.57467	5.60085e-05	2
FLT3	0.268093	7.3241	2.33557	0.0297891	0.203045	-4.37662	0	1.77877	7.3241	15.4963	8.92467e-13	6.70064e-10	19.3789	1	ILMN_1766363	FLT3	ILMN_8780	2322	121114303	NM_004119.2	NP_004110.2	2850451	S	3019	GGATTTGGGGCTACTCTCTCCGCAGGCTCAGGTCGAAGATTCGTAGAGGA	-	27476184-27476188:27476189-27476233	0	0	0	FLT3	fms-related tyrosine kinase 3	Plasma Membrane	kinase	1.87097	0.00980826	X	5.46878	2.82513e-05	2
GPR109A	1.704	7.27055	24.0744	1.71776e-16	1.19757e-12	26.6291	1	0.116792	7.27055	1.65005	0.114197	0.450637	-5.73855	0	ILMN_1750497	GPR109A	ILMN_26372	338442	41152145	NM_177551.3	NP_808219.1	3830228	S	1122	GGTGAGCCATGGAGCCCCTCTTATCTGGGCCCAACCTCTCCTTAAATAAC	-	121752686-121752691:121752692-121752735	0	0	0	HCAR2	hydroxycarboxylic acid receptor 2	Plasma Membrane	G-protein coupled receptor	-	-	-	-	-	-
GPR109B	1.63032	7.31252	22.3134	7.69818e-16	2.8899e-12	25.4055	1	0.0434408	7.31252	0.594552	0.55866	0.867856	-6.88648	0	ILMN_1677693	GPR109B	ILMN_22584	8843	5174460	NM_006018.1	NP_006009.1	5050041	A	1104	CTCCGGTGAGCCATGGAGCCCCTCTTATCTGGGCCCAACCTCAAATAACC	-	121766144-121766193	0	0	0	HCAR3	hydroxycarboxylic acid receptor 3	Plasma Membrane	G-protein coupled receptor	-	-	-	-	-	-
FLVCR2	-0.391369	9.87575	-2.4224	0.0248033	0.179878	-4.20912	0	1.10333	9.87575	6.82911	1.08347e-06	5.36264e-05	5.50367	1	ILMN_2204876	FLVCR2	ILMN_15043	55640	8923349	NM_017791.1	NP_060261.1	1510026	S	3391	GTCCACGTTTTCGGCAGAAGTAGTGAGTCAGTGTGGAAGAGAGGTGAGGG	+	75184054-75184103	0	0	0	FLVCR2	feline leukemia virus subgroup C cellular receptor family, member 2	Plasma Membrane	transporter	-0.48688	0.0361745	X	1.03252	0.000731217	2
CD82	1.26093	8.32334	5.59442	1.63951e-05	0.000674065	2.90842	1	1.53415	8.32334	6.80666	1.13638e-06	5.54577e-05	5.45571	1	ILMN_1662973	CD82	ILMN_162780	3732	67782352	NM_002231.3	NP_002222.1	5130136	I	510	TACTTTGCTTTCCTGCTCCTGATCCTCATTGCCCAGGTGACGGCCGGGGC	+	44583481-44583530	0	0	0	CD82	CD82 molecule	Plasma Membrane	other	1.14677	0.0056425	2	2.57467	5.60085e-05	2
CD84	-1.09576	11.2098	-6.23421	3.91855e-06	0.000223403	4.3328	1	-0.532181	11.2098	-3.02779	0.00652898	0.0656287	-3.13034	0	ILMN_1698367	CD84	ILMN_16790	8832	4502686	NM_003874.1	NP_003865.1	4060095	S	2718	TCACAGTCCCTTGCCTATGTGTGGCAGAGTGTCCCAGCCAGATGTGTGCC	-	158782927-158782976	0	0	0	CD84	CD84 molecule	Plasma Membrane	other	-0.874379	0.00866236	2	-0.00500426	0.990938	X
FOLR2	-0.203366	10.4648	-0.685972	0.500429	0.832819	-6.6418	0	-2.56627	10.4648	-8.65624	2.8039e-08	2.69894e-06	9.17645	1	ILMN_1745963	FOLR2	ILMN_11875	2350	148277006	NM_000803.3	NP_000794.2	4480364	S	841	GAATGCTGGTGAGATGCTTCATGGGACTGGGGGTCTCCTGCTCAGTCTGG	+	71610373-71610422	0	0	0	FOLR2	folate receptor 2 (fetal)	Plasma Membrane	transporter	-0.163377	0.797913	X	-3.20665	0.000180385	2
GPR177	0.499562	8.79741	2.48706	0.0216074	0.163765	-4.08223	0	-0.786434	8.79741	-3.91525	0.00082759	0.0125702	-1.12566	1	ILMN_2283325	GPR177	ILMN_3521	79971	50541968	NM_024911.4	NP_079187.3	4250711	I	2305	CCTTTGCGGTCCCAGTCCAAGGTAGGCTGGTGTCATAGTCTTCTCACTCC	-	68364039-68364088	0	0	0	WLS	wntless homolog (Drosophila)	Cytoplasm	other	-	-	-	-	-	-
CDAN1	1.18483	8.70454	7.41334	3.20818e-07	3.04011e-05	6.8236	1	1.44899	8.70454	9.06617	1.31184e-08	1.46836e-06	9.93785	1	ILMN_1659727	CDAN1	ILMN_168771	146059	113425594	XM_001129302.1	XP_001129302.1	3940309	I	4028	GGTAGGACTCAACCAACTGAAACCTGACTTTCCCCCTGTACCTTCAGCCC			0	0	0	CDAN1	congenital dyserythropoietic anemia, type I	Nucleus	other	1.85113	0.000237762	2	2.35777	3.89222e-05	2
CDC16	-0.714449	10.5967	-6.74994	1.28224e-06	9.41457e-05	5.44512	1	-0.502483	10.5967	-4.74734	0.000116267	0.00250511	0.816766	0	ILMN_2256765	CDC16	ILMN_175130	8881	118402577	NM_001078645.1	NP_001072113.1	5360619	I	2118	CCTCTCCATGGCTTAAGAATGTCCCACTTCCTAACGTGACTCCAAACTGC	+	114056077-114056126	0	0	0	CDC16	cell division cycle 16 homolog (S. cerevisiae)	Nucleus	other	-0.640297	0.00815192	2	-0.63533	0.00713345	X
FOXO1	-0.508052	8.46381	-2.90794	0.00856112	0.0869407	-3.21689	0	-0.653385	8.46381	-3.73978	0.00125148	0.0175402	-1.53118	1	ILMN_1738816	FOXO1	ILMN_164765	2308	133930787	NM_002015.3	NP_002006.2	6770719	S	5387	CAACCTGGCATTACAGTTGGCCTCTCCTTGAGGTGGGCACAGCCTGGCAG	-	40028102-40028151	0	1	1	FOXO1 (includes EG:2308)	forkhead box O1	Nucleus	transcription regulator	-0.483999	0.114129	X	-0.66104	0.0369137	2
CDC25B	-0.878008	10.3736	-4.22637	0.000396796	0.00834675	-0.245163	1	-0.646911	10.3736	-3.11396	0.00536439	0.0561667	-2.9423	0	ILMN_2338323	CDC25B	ILMN_5916	994	47078250	NM_004358.3	NP_004349.1	4760338	A	3361	GCGCAGTGCCTTGCATACCCAAACCAGGTGGGAGCGTTTTGTTGAGCATG	+	3734490-3734539	0	0	0	CDC25B	cell division cycle 25 homolog B (S. pombe)	Nucleus	phosphatase	-0.470191	0.0375178	2	-0.130818	0.588949	X
GPSN2	0.0828587	10.8936	0.735211	0.470553	0.817786	-6.60637	0	-0.646539	10.8936	-5.73678	1.18752e-05	0.000380227	3.09785	1	ILMN_1720799	GPSN2	ILMN_6454	9524	50726974	NM_138501.4	NP_612510.1	2370259	S	904	CATCATGACGCAGTGTCTCCCAGTGGCCCTGTTCTCCCTGGTGGGCTTCA	+	14537453-14537475:14537556-14537582	0	0	0	TECR	trans-2,3-enoyl-CoA reductase	Plasma Membrane	enzyme	-	-	-	-	-	-
CDC42EP2	0.870669	7.44379	7.42442	3.13637e-07	2.98972e-05	6.8461	1	0.669009	7.44379	5.70481	1.27648e-05	0.000403727	3.02539	1	ILMN_1652777	CDC42EP2	ILMN_3335	10435	30089963	NM_006779.2	NP_006770.1	6180253	S	1771	ACGTCGTACCTGACGCTGAGCCTGTCATGAGAATGCAACAGGAGCAAACC	+	64846266-64846315	0	0	0	CDC42EP2	CDC42 effector protein (Rho GTPase binding) 2	Plasma Membrane	other	1.11569	0.00477979	2	0.248253	0.470824	d
FOXRED2	-0.087612	7.99503	-0.645726	0.525632	0.846764	-6.66902	0	-0.619255	7.99503	-4.56409	0.000178846	0.00357854	0.388505	1	ILMN_2130635	FOXRED2	ILMN_165686	80020	34303916	NM_024955.4	NP_079231.3	160181	S	3870	GCCTAGGTGACAAAGCAAGACCCACAGTAAAGCCCCCACACCCCATCTCA	-	35214248-35214297	0	0	0	FOXRED2	FAD-dependent oxidoreductase domain containing 2	Cytoplasm	other	-0.509982	0.106034	X	-1.346	0.00119527	2
CDC42EP4	2.13153	9.30977	15.2076	1.27339e-12	1.72622e-09	18.871	1	2.49169	9.30977	17.7771	6.47144e-14	8.09793e-11	21.8644	1	ILMN_1745223	CDC42EP4	ILMN_7144	23580	48375181	NM_012121.4	NP_036253.2	1070047	S	2908	TCCAGGTTCGGTGCCCTGTTGGTGCTCCTGTTTCCAATAGCTTAGGTCCC	-	68791501-68791550	0	0	0	CDC42EP4	CDC42 effector protein (Rho GTPase binding) 4	Cytoplasm	other	1.13905	0.00687373	2	1.03461	0.00934487	2
CDC42SE1	0.945777	8.76884	4.02352	0.000640866	0.0120692	-0.715364	1	1.05987	8.76884	4.50889	0.000203678	0.00398712	0.259403	1	ILMN_2349138	CDC42SE1	ILMN_2548	56882	84798619	NM_001038707.1	NP_001033796.1	4480192	A	2645	GGGGTCAGGAATGTAGGAACTGGTATCCATTCTGCCAATTCCACCACCCA	-	149290559-149290608	0	0	0	CDC42SE1	CDC42 small effector 1	Plasma Membrane	other	0.575929	0.0254154	2	0.66984	0.0115386	2
CDC42SE1	0.594401	7.86125	4.23505	0.00038874	0.00821623	-0.225008	1	0.67899	7.86125	4.83774	9.40798e-05	0.00210224	1.02768	1	ILMN_1769027	CDC42SE1	ILMN_2548	56882	84798619	NM_001038707.1	NP_001033796.1	4540288	S	2573	CTGCCTGCTCTGAGACAAGAAGGGTGGGGTCTCATTAGCTTTGCAACAGG	-	149290631-149290680	0	0	0	CDC42SE1	CDC42 small effector 1	Plasma Membrane	other	0.575929	0.0254154	2	0.66984	0.0115386	2
CDCA4	0.611826	8.03816	5.27666	3.39358e-05	0.00120097	2.18553	1	0.0313091	8.03816	0.270024	0.789846	0.948914	-7.03107	0	ILMN_1684045	CDCA4	ILMN_5601	55038	22027510	NM_145701.1	NP_663747.1	290333	A	1467	TTCCACTCCTGCCCCGCCTCACCCCACATGCTCCCTGTTTCTCATGCTTT	-	104547433-104547482	0	0	0	CDCA4	cell division cycle associated 4	Nucleus	other	0.701832	0.0074069	2	0.105538	0.683293	X
CDCA7L	0.811489	7.85874	5.83633	9.49018e-06	0.000436924	3.45228	1	1.24395	7.85874	8.94661	1.63355e-08	1.71811e-06	9.71811	1	ILMN_2230683	CDCA7L	ILMN_14646	55536	31542536	NM_018719.2	NP_061189.2	3800753	S	1817	CACTCCAGGCCAAGTGTGCCTTAGCACGAGTGACCACAGTTTAATAGACC	-	21908047-21908096	0	0	0	CDCA7L	cell division cycle associated 7-like	Nucleus	other	2.20006	4.1034e-05	2	2.04847	3.2341e-05	2
CDK5RAP1	-0.612882	9.51295	-6.84545	1.04658e-06	8.06877e-05	5.64728	1	-0.297134	9.51295	-3.31878	0.00334758	0.0389436	-2.48832	0	ILMN_1711023	CDK5RAP1	ILMN_177869	51654	28872781	NM_016408.2	NP_057492.2	1260025	A	1854	GGACCACTCTGAGGGACTCTTCTGCATATTGCTGACCTGAGAGGATGGCC	-	31410494-31410509:31410510-31410543	0	0	0	CDK5RAP1	CDK5 regulatory subunit associated protein 1	Extracellular Space	other	-0.735447	0.00119067	2	-0.140504	0.40221	X
FTH1	0.268683	11.8998	1.55523	0.135221	0.48833	-5.69736	0	1.0475	11.8998	6.06328	5.71669e-06	0.00020727	3.83169	1	ILMN_1683146	FTH1	ILMN_11546	2495	56682958	NM_002032.2	NP_002023.2	5220240	S	956	GTCTTTGAGGTCTTGGGATGAATCAGAAATCTATCCAGGCTATCTTCCAG	-	61488556-61488605	0	0	0	FTH1 (includes EG:14319)	ferritin, heavy polypeptide 1	Cytoplasm	enzyme	0.154497	0.372329	X	0.318459	0.0624839	d
CDK5RAP2	0.701695	8.05824	3.26047	0.00383081	0.0478136	-2.4505	1	1.00284	8.05824	4.65974	0.000142812	0.00296072	0.612141	1	ILMN_2415529	CDK5RAP2	ILMN_3896	55755	58535452	NM_001011649.1	NP_001011649.1	4260017	A	5240	CTGGGAACAAAGGGTCCACACCCAGCACCACTGAGCAAGTTTGTGAGCAG	-	122202946-122202984:122204905-122204915	0	0	0	CDK5RAP2	CDK5 regulatory subunit associated protein 2	Cytoplasm	other	1.11535	0.0186005	2	1.12705	0.0160501	2
FXYD5	-0.204058	11.1862	-1.73137	0.0984346	0.415016	-5.43235	0	-1.0663	11.1862	-9.0472	1.35812e-08	1.50098e-06	9.90312	1	ILMN_1704286	FXYD5	ILMN_10835	53827	47778937	NM_144779.1	NP_659003.1	1470332	A	1463	TGGCCAGAGAGGGAAGACACAGATGATGAAGCTGGAGCCAGGGCTGCCGG	+	40352457-40352506	0	0	0	FXYD5	FXYD domain containing ion transport regulator 5	Plasma Membrane	ion channel	-0.061875	0.77741	X	-0.967084	0.000374123	2
FXYD5	-0.279425	12.1237	-2.54936	0.0188956	0.150741	-3.95829	0	-1.07208	12.1237	-9.78126	3.66573e-09	5.17037e-07	11.2131	1	ILMN_2309848	FXYD5	ILMN_9982	53827	47778936	NM_014164.4	NP_054883.3	7380546	A	810	AAGGCTACCTGGCGCCTTGGGGGCTGTCCCTCAAGTTATCTCCTCTGCTA	+	40352545-40352594	0	0	0	FXYD5	FXYD domain containing ion transport regulator 5	Plasma Membrane	ion channel	-0.061875	0.77741	X	-0.967084	0.000374123	2
CDKN1A	1.17346	12.4813	5.69231	1.31309e-05	0.00056261	3.12923	1	0.82251	12.4813	3.98991	0.000693821	0.0109014	-0.952309	1	ILMN_1784602	CDKN1A	ILMN_16780	1026	17978496	NM_000389.2	NP_000380.1	4230201	A	1981	GTCCTGGTTCCCGTTTCTCCACCTAGACTGTAAACCTCTCGAGGGCAGGG	+	36762947-36762996	1	1	1	CDKN1A	cyclin-dependent kinase inhibitor 1A (p21, Cip1)	Nucleus	kinase	1.03659	0.0143134	2	0.95165	0.0191297	2
FYN	0.681859	8.60476	2.7439	0.0123454	0.112592	-3.56159	0	1.90354	8.60476	7.66014	1.94516e-07	1.31844e-05	7.23098	1	ILMN_1686555	FYN	ILMN_25662	2534	23510361	NM_153047.1	NP_694592.1	610164	A	1705	CAGCGGAACCGCCCAGGATCAGATTGCATGTGACTCTGAAGCTGACGAAC	-	112089496-112089545	0	0	0	FYN	FYN oncogene related to SRC, FGR, YES	Plasma Membrane	kinase	0.66509	0.371176	X	2.8412	0.00189368	2
FYN	0.298417	7.83467	1.59042	0.12707	0.474318	-5.64616	0	1.15164	7.83467	6.13771	4.84771e-06	0.000181008	3.99732	1	ILMN_2380801	FYN	ILMN_28270	2534	23510363	NM_153048.1	NP_694593.1	840025	A	1394	GCTGGAAAAAGGACCCTGAAGAACGCCCCACTTTTGAGTACTTGCAGAGC	-	112089694-112089743	0	1	0	FYN	FYN oncogene related to SRC, FGR, YES	Plasma Membrane	kinase	0.66509	0.371176	X	2.8412	0.00189368	2
FYN	0.666672	8.11036	2.81733	0.0104874	0.100197	-3.40837	0	1.54227	8.11036	6.51757	2.11215e-06	9.16242e-05	4.83235	1	ILMN_1781207	FYN	ILMN_25662	2534	23510361	NM_153047.1	NP_694592.1	4860050	I	812	GTTGTGTCTGGAGAAGAAGCTGGGTCAGGGGTGTTTCGCTGAAGTGTGGC	-	112127413-112127462	0	0	0	FYN	FYN oncogene related to SRC, FGR, YES	Plasma Membrane	kinase	0.66509	0.371176	X	2.8412	0.00189368	2
FYN	0.671235	8.32586	2.40006	0.0260062	0.185645	-4.25254	0	1.45582	8.32586	5.2054	4.00026e-05	0.00103837	1.88141	1	ILMN_2249920	FYN	ILMN_5919	2534	23510344	NM_002037.3	NP_002028.1	6290725	I	1298	GCCGCCTAGTAGTTCCCTGTCACAAAGGGATGCCAAGGCTTACCGATCTG	-	112128093-112128142	0	0	0	FYN	FYN oncogene related to SRC, FGR, YES	Plasma Membrane	kinase	0.66509	0.371176	X	2.8412	0.00189368	2
[truncated: 2,158 more rows]

## Sheet: Jurkat
Table S4. The differentially expressed genes in Jurkat cells after 10µg/ml ZnO-1 exposure
[truncated: 1,104 more rows]
