# Supplementary material
Source: publisher figshare collection journal article supplement (https://plos.figshare.com/articles/dataset/_/750110)
Supplement: Supplementary file 1 [file 1 › Table_S5.xlsx]

## Sheet: Illumina data
Table S5. Normalized expression of SLC30A and SLC39A family members in Illumina data
		MDDC samples																														HMDM samples
Probe ID	Gene	MDDC_rep1_ctr_6h_0	MDDC_rep1_ctr_24h_0	MDDC_rep1_TiO2_6h_1	MDDC_rep1_TiO2_6h_10	MDDC_rep1_TiO2_24h_1	MDDC_rep1_TiO2_24h_10	MDDC_rep1_ZnO_6h_1	MDDC_rep1_ZnO_6h_10	MDDC_rep1_ZnO_24h_1	MDDC_rep1_ZnO_24h_10	MDDC_rep2_ctr_6h_0	MDDC_rep2_ctr_24h_0	MDDC_rep2_TiO2_6h_1	MDDC_rep2_TiO2_6h_10	MDDC_rep2_TiO2_24h_1	MDDC_rep2_TiO2_24h_10	MDDC_rep2_ZnO_6h_1	MDDC_rep2_ZnO_6h_10	MDDC_rep2_ZnO_24h_1	MDDC_rep2_ZnO_24h_10	MDDC_rep3_ctr_6h_0	MDDC_rep3_ctr_24h_0	MDDC_rep3_TiO2_6h_1	MDDC_rep3_TiO2_6h_10	MDDC_rep3_TiO2_24h_1	MDDC_rep3_TiO2_24h_10	MDDC_rep3_ZnO_6h_1	MDDC_rep3_ZnO_6h_10	MDDC_rep3_ZnO_24h_1	MDDC_rep3_ZnO_24h_10	HMDC_rep1_ctr_6h_0	HMDC_rep1_ctr_24h_0	HMDC_rep1_TiO2_6h_1	HMDC_rep1_TiO2_6h_10	HMDC_rep1_TiO2_24h_1	HMDC_rep1_TiO2_24h_10	HMDC_rep1_ZnO_6h_1	HMDC_rep1_ZnO_6h_10	HMDC_rep1_ZnO_24h_1	HMDC_rep1_ZnO_24h_10	HMDC_rep2_ctr_6h_0	HMDC_rep2_ctr_24h_0	HMDC_rep2_TiO2_6h_1	HMDC_rep2_TiO2_6h_10	HMDC_rep2_TiO2_24h_1	HMDC_rep2_TiO2_24h_10	HMDC_rep2_ZnO_6h_1	HMDC_rep2_ZnO_6h_10
ILMN_1745021	SLC30A1	8.20592	8.19213	8.27042	8.22596	8.13574	8.11401	8.36441	10.7593	8.13866	10.2914	8.07226	8.03226	7.91917	8.00974	7.91883	7.95712	7.93096	8.7193	7.95698	8.55213	8.17199	8.07539	8.28577	8.18003	8.25428	8.1637	8.30641	8.92806	8.46189	8.73496	8.93229	8.51208	8.89016	9.0318	8.45381	8.4299	9.2667	10.5415	8.54132	9.85033	9.19722	8.4178	8.99647	9.19722	8.40483	8.59805	9.29191	10.4567
ILMN_2067852	SLC30A1	7.64318	7.70355	7.58289	7.66522	7.70976	7.67514	7.65421	9.45229	7.94848	9.38499	7.43686	7.4939	7.42283	7.49173	7.6611	7.52946	7.60084	7.88694	7.52757	7.76585	7.74117	7.60332	7.66804	7.74804	7.9024	7.59509	7.67709	8.24599	7.818	8.29418	8.16414	7.59995	8.17856	8.20642	7.86185	7.88151	8.51855	9.34837	7.9327	8.8647	8.24467	7.76842	8.35959	8.18712	7.83452	7.63496	8.31983	9.184
ILMN_1805807	SLC30A3	7.4686	7.56672	7.65079	7.5933	7.51566	7.60064	7.48321	8.08619	7.61775	8.61449	7.72525	7.8495	7.90907	7.9024	7.71094	7.82897	7.85768	8.22474	7.81631	7.87124	8.27976	8.29533	8.26304	8.16837	8.28733	8.39954	8.21177	8.34493	8.43506	8.37353	7.61206	7.60458	7.54561	7.67074	7.65604	7.53188	7.52655	8.62318	7.54984	9.9464	7.44697	7.50293	7.32301	7.3696	7.55358	7.64373	7.31727	7.73253
ILMN_1709728	SLC30A5	9.44744	9.4527	9.29264	9.3553	9.72577	9.6239	9.58659	9.95708	9.4072	9.5647	9.37654	9.52858	9.29456	9.17639	9.28101	9.48544	9.30427	9.34875	9.25582	9.20207	9.45944	9.81238	9.66671	9.8433	9.67881	9.82185	9.61703	9.2833	9.70824	9.99292	8.57646	8.52134	8.60784	8.5897	8.7193	8.71207	8.96469	9.02537	8.82319	8.77611	8.78756	8.52209	9.07225	8.99352	8.70162	8.8102	8.963	8.86177
ILMN_2258471	SLC30A5	7.25059	7.2124	7.21618	7.215	7.259	7.2172	7.18488	7.25353	7.22316	7.29628	7.26553	7.22842	7.28449	7.26874	7.222	7.23553	7.13651	7.18274	7.22675	7.2383	7.30706	7.25704	7.24527	7.23238	7.19773	7.29438	7.23871	7.26676	7.18799	7.2129	7.24857	7.29539	7.19719	7.2414	7.19062	7.25839	7.2482	7.23476	7.22108	7.24268	7.34927	7.2416	7.21359	7.18541	7.25876	7.13535	7.30437	7.20013
ILMN_1664153	SLC30A5	9.27631	9.24308	9.27735	9.40834	9.31287	9.04814	9.27029	9.39799	9.19188	9.60909	8.94828	9.18162	8.83629	9.21773	9.13685	9.06489	8.98929	8.87273	9.12457	9.00857	9.39442	9.22829	9.1523	9.26368	9.51528	9.27952	9.37191	9.14982	9.4057	9.34371	8.48929	8.46855	8.6299	8.67681	8.73356	8.73496	8.75789	9.08253	8.66946	8.77145	8.83924	8.82767	8.77496	8.64783	8.53494	8.69806	8.95685	9.7858
ILMN_1732079	SLC30A5	7.2111	7.24454	7.33065	7.15159	7.20666	7.184	7.22236	7.20465	7.23411	7.21271	7.15906	7.21116	7.25109	7.1794	7.19862	7.17121	7.21086	7.17121	7.18071	7.22695	7.20679	7.27065	7.20709	7.24355	7.21865	7.31625	7.24912	7.23145	7.17627	7.25672	7.31103	7.29586	7.2363	7.17168	7.24881	7.18474	7.30293	7.3284	7.39074	7.23272	7.21904	7.16268	7.26874	7.27288	7.25479	7.26848	7.21221	7.26841
ILMN_1789999	SLC30A7	10.5975	10.32	10.0705	10.7341	10.1858	10.4526	10.2448	10.511	10.4363	10.3658	10.0914	10.1774	10.1226	10.0146	10.4404	10.1238	10.1822	10.175	10.2165	10.0693	10.0945	9.92219	9.99801	10.0851	10.3489	10.1212	10.1828	10.248	10.1774	10.0435	10.3482	10.1762	10.2066	10.2566	10.3695	10.3858	10.4116	10.4141	10.4561	10.3214	10.3866	10.3858	10.2264	10.3708	10.367	10.1403	10.2024	10.7454
ILMN_2116714	SLC39A1	10.6573	10.6331	10.2006	10.35	10.434	10.585	10.6331	10.3677	10.3944	10.4306	10.3937	10.3286	10.2289	10.417	10.3689	10.3735	10.268	10.3878	10.2178	10.2718	10.563	10.5393	10.528	10.5249	10.3771	10.5811	10.5961	10.5272	10.7204	10.5001	11.0011	10.8599	11.0613	10.9982	10.948	11.0645	10.8863	11.0276	10.8645	10.9499	10.7136	10.9567	10.9182	10.8852	10.894	10.8691	11.125	11.2697
ILMN_1742705	SLC39A11	10.11	9.76881	9.85294	10.2189	9.69072	9.85142	9.7358	9.51065	9.86953	9.57158	9.5904	9.59745	9.42708	9.6048	9.77174	9.56216	9.52735	9.63957	9.6404	9.70181	9.71306	9.46462	9.58871	9.75142	9.7682	9.69635	9.48158	9.43237	9.859	9.4527	8.85699	8.75172	8.67082	8.93295	9.12004	9.18362	8.53911	8.42042	9.1586	9.10129	8.25611	9.02697	8.47879	8.47928	9.21232	9.3111	8.46978	8.18651
ILMN_1764629	SLC39A14	7.42722	7.29462	7.26297	7.34772	7.2392	7.35575	7.30795	7.67894	7.2918	7.26849	7.36154	7.40814	7.30968	7.30279	7.43772	7.36109	7.40386	7.39093	7.33127	7.3373	7.35021	7.33021	7.35949	7.31249	7.43034	7.4115	7.42557	7.34284	7.30419	7.36941	7.57574	7.36635	7.55044	7.51787	7.37015	7.25014	7.52919	8.09086	7.3748	7.36696	7.65957	7.48603	7.53215	7.63886	7.38471	7.40015	7.58342	8.51908
ILMN_1710543	SLC39A3	8.08546	8.59174	7.35569	8.80194	8.62134	8.4209	8.64703	8.15871	8.3513	8.36623	8.66887	8.93572	8.78991	8.64959	8.44869	8.59077	8.76465	8.67305	8.62959	8.50641	8.40392	8.67848	8.58223	8.54005	8.24996	8.7853	8.13885	7.91736	8.32359	8.55692	7.23979	7.35675	7.21508	7.1979	7.96852	8.11737	7.99034	7.56893	8.05508	8.25636	7.82471	7.33802	7.92716	7.57736	8.17215	8.30971	8.12479	7.84804
ILMN_2234970	SLC39A3	10.1528	10.7033	10.8194	10.3314	10.9315	10.831	10.9334	10.4782	10.6291	10.297	11.0268	11.0709	11.1512	10.7162	10.3783	10.7537	11.0799	10.9991	10.7315	10.9789	10.3802	11.0483	10.948	10.8823	10.1705	10.9448	10.7242	10.5067	10.6709	10.6564	9.65098	10.0851	9.79536	9.58072	9.8772	10.1858	9.88411	9.32765	9.96081	9.87317	9.88737	10.0249	10.261	9.99239	10.1864	10.3121	9.9281	9.28511
ILMN_1746986	SLC39A3	7.71471	7.58484	7.88328	8.14152	7.49447	7.57253	7.74256	7.65366	7.8647	7.75073	7.61608	7.44807	7.44682	7.55617	7.57516	7.46922	7.62551	7.44349	7.47514	7.49324	7.71156	7.5986	7.69068	7.46617	7.68969	7.65913	7.76728	7.62561	7.53454	7.70809	8.0237	7.69033	7.98252	8.1226	7.39932	7.70342	7.69033	7.63793	7.67221	7.74354	7.78036	7.83183	7.83081	7.77534	7.6497	7.56541	7.68689	7.91151
ILMN_2143566	SLC39A6	7.79558	7.95606	7.92993	7.81058	7.8022	7.84101	7.69174	7.766	7.93073	7.79515	7.77858	7.73469	7.54582	7.86304	7.99546	7.94881	7.98676	7.71491	7.81726	7.97349	7.80042	7.83831	7.87081	7.90682	7.91708	7.69615	7.64194	7.83328	7.8294	7.99811	7.65336	7.61587	7.49629	7.64453	7.72451	7.71361	7.60867	7.73556	7.62824	7.5137	7.62721	7.5842	7.58753	7.65728	7.56764	7.59784	7.71419	7.58968
ILMN_1750394	SLC39A6	8.11268	8.25108	8.09998	8.03738	8.39981	8.20768	8.32242	8.13904	8.14188	8.5836	8.51512	8.4291	8.16933	8.67738	8.95327	8.60145	8.26855	8.50083	8.72199	8.35378	8.29377	8.2409	8.25365	8.27135	8.19643	8.22322	8.48929	8.24749	8.37509	8.33762	7.81755	7.83405	8.07383	7.62792	8.09421	8.20214	8.33039	8.56262	7.98234	8.23691	7.94132	7.96108	8.24622	8.01693	8.04753	8.28904	8.48362	8.26095
ILMN_2233539	SLC39A8	7.26274	7.28796	7.32576	7.23616	7.19352	7.34645	7.17445	7.3553	7.22558	7.44105	7.32573	7.37478	7.21721	7.20973	7.38541	7.37873	7.23573	7.31931	7.45896	7.33587	7.27793	7.34282	7.31129	7.31141	7.52463	7.23085	7.29301	7.40234	7.32981	7.36761	7.58726	7.22358	7.67514	7.63803	7.32452	7.29264	7.75409	7.92239	7.36822	7.29577	7.31843	7.09855	7.35552	7.48636	7.18968	7.10997	7.72168	7.98371
ILMN_1695316	SLC39A8	8.58677	8.41729	8.23983	8.30779	8.22576	8.10174	8.41848	9.1586	8.2862	10.3148	9.46369	9.2181	8.58803	9.67789	10.1089	9.81544	9.78686	9.54908	9.46321	9.43498	8.99962	8.81909	9.3796	8.78198	9.714	8.5978	9.28893	8.95267	9.03342	9.29375	11.1972	8.08425	11.263	11.2466	8.74404	8.62343	11.5815	11.497	8.45431	10.5132	10.2712	8.01763	10.1621	10.4955	7.93073	7.93328	11.0177	11.8736
ILMN_1756878	SLC39A9	7.5052	7.42005	7.23222	7.58779	7.49954	7.45427	7.52911	7.41959	7.38283	7.77534	7.77763	7.73457	7.69689	7.84333	7.83468	7.85364	7.78412	7.85351	7.85626	7.63131	7.79059	7.62445	7.76276	7.76054	7.89032	7.94653	7.6393	7.60602	7.77817	7.63556	7.40745	7.21422	7.36593	7.36567	7.68322	7.59804	7.64838	7.66497	7.71009	7.74229	7.47967	7.33277	7.52229	7.47134	7.44275	7.69174	7.69907	7.78802
[truncated: 42 more columns]

## Sheet: Affymetrix data
Table S5. Normalized expression of SLC30A and SLC39A family members in Affymetrix data
	HMDM samples												MDDC samples																				Jurkat samples
Probe Set ID	HMDM_rep1_ZnO-1_24h_10	HMDM_rep1_ctr_6h_0	HMDM_rep1_ctr_24h_0	HMDM_rep1_ZnO-1_6h_10	HMDM_rep2_ZnO-1_24h_10	HMDM_rep2_ctr_6h_0	HMDM_rep2_ctr_24h_0	HMDM_rep2_ZnO-1_6h_10	HMDM_rep3_ZnO-1_24h_10	HMDM_rep3_ctr_6h_0	HMDM_rep3_ctr_24h_0	HMDM_rep3_ZnO-1_6h_10	MDDC_rep4_ctr_24h_0	MDDC_rep4_ZnO-1_24h_10	MDDC_rep5_ctr_24h_0	MDDC_rep5_ZnO-1_24h_10	MDDC_rep6_ctr_24h_0	MDDC_rep6_ZnO-1_24h_10	MDDC_rep7_ctr_24h_0	MDDC_rep7_ZnO-1_24h_10	MDDC_rep1_ZnO-1_24h_10	MDDC_rep1_ctr_6h_0	MDDC_rep1_ctr_24h_0	MDDC_rep1_ZnO-1_6h_10	MDDC_rep2_ZnO-1_24h_10	MDDC_rep2_ctr_6h_0	MDDC_rep2_ctr_24h_0	MDDC_rep2_ZnO-1_6h_10	MDDC_rep3_ZnO-1_24h_10	MDDC_rep3_ctr_6h_0	MDDC_rep3_ctr_24h_0	MDDC_rep3_ZnO-1_6h_10	Jurkat_rep4_ZnO-5_24h_10	Jurkat_rep5_ZnO-5_24h_10	Jurkat_rep6_ZnO-5_24h_10	Jurkat_rep4_ZnO-3_24h_10	Jurkat_rep5_ZnO-3_24h_10	Jurkat_rep6_ZnO-3_24h_10	Jurkat_rep4_ZnO-9_24h_10	Jurkat_rep5_ZnO-9_24h_10	Jurkat_rep6_ZnO-9_24h_10	Jurkat_rep4_ZnO-2_24h_10	Jurkat_rep5_ZnO-2_24h_10	Jurkat_rep6_ZnO-2_24h_10	Jurkat_rep4_ZnO-4_24h_100	Jurkat_rep5_ZnO-4_24h_100	Jurkat_rep6_ZnO-4_24h_100	Jurkat_rep4_ZnO-4_24h_10	Jurkat_rep5_ZnO-4_24h_10
11716430_a_at	7.95457	9.24707	6.73736	8.67366	7.73697	8.31567	6.49727	8.75642	8.18922	8.75183	6.04995	8.71793	6.28534	6.42902	6.66678	6.89531	6.69943	6.1448	6.90312	7.30603	7.42323	6.99592	6.68812	7.26096	6.13962	6.51305	6.36804	6.57408	6.6535	5.31175	6.28347	6.30265	6.10461	5.84332	5.62934	6.19538	5.58157	6.12526	5.90017	6.1783	6.0262	5.59594	5.93159	5.55572	5.88103	5.73502	6.03238	5.85653	5.94395
11716431_x_at	8.42245	9.51886	7.53536	9.14453	8.05591	8.74803	7.39622	9.08894	8.30412	9.16455	7.22233	8.96358	6.91154	6.90705	7.18253	7.48312	7.54681	7.27163	7.61039	7.65253	7.98378	7.03787	7.1951	7.49513	7.02764	7.10736	7.20709	7.49131	7.1931	6.92208	7.28612	7.14999	6.43281	6.30654	6.4653	6.5692	6.05561	6.61667	6.56629	6.40222	6.71243	6.38072	6.29284	6.55129	6.67212	6.67113	6.77592	6.5125	6.61866
11716678_a_at	3.27989	4.15943	3.8051	3.96265	3.72521	3.72706	3.99561	4.01236	3.46191	4.01709	3.39439	3.71807	3.94123	3.36726	4.20402	3.75051	3.5663	3.82156	3.72521	3.3424	3.88783	3.90786	3.70074	3.58519	4.16833	3.50581	3.92072	4.19822	3.98609	4.55705	3.89042	3.90259	3.89146	3.99439	4.02661	3.38679	3.71533	3.39959	3.92371	3.7438	3.9491	4.16012	4.06836	3.7012	3.65007	3.61226	4.35041	3.53389	3.49438
11716679_s_at	5.02095	5.27619	5.09497	4.74511	4.64001	4.90597	4.33411	4.77733	4.96731	4.88733	4.82168	4.63172	4.76075	5.01315	5.13775	5.38697	5.0383	4.7417	4.896	4.9932	4.77991	4.75621	5.31625	5.20817	5.40518	4.78879	4.92873	4.96221	5.20669	4.19207	5.25583	4.78976	5.11075	4.97914	5.00035	5.02548	4.60656	5.19831	4.9932	4.90492	4.88087	4.73458	5.13715	5.05623	5.27104	4.97616	4.97422	5.26631	4.99943
11716680_x_at	3.77871	4.85941	4.37559	4.3545	4.35983	4.53739	4.26233	4.18269	4.6288	4.35586	4.37729	5.29989	4.07175	4.57852	5.07004	4.96748	4.80606	4.54089	4.91942	4.81533	4.5633	4.6207	4.45995	4.75168	4.60822	4.12869	4.67065	4.94859	4.64742	4.57803	4.71125	4.91664	5.2456	4.90411	4.7532	4.70753	4.60142	4.68306	4.82823	4.64028	4.19623	4.88302	4.74628	4.68713	5.12445	5.02152	5.31309	4.83763	4.39705
11716681_at	4.08415	4.02418	4.39075	3.89954	4.82829	3.66868	3.87713	4.27736	4.03246	3.72205	4.31563	3.59966	3.82809	4.52267	4.9627	3.89505	4.68975	4.42431	4.30409	4.4234	3.59705	4.00188	4.20634	4.01466	4.69894	4.60114	4.65664	4.80674	4.31952	4.85973	4.2502	3.91929	3.938	4.53359	4.23005	4.33832	4.12994	4.3317	4.40994	4.439	4.6414	4.84213	4.8043	4.71232	4.11209	4.71663	4.1363	4.53091	4.1828
11716682_s_at	9.90878	9.68891	9.7829	9.33933	9.70327	9.25587	9.20278	9.38099	9.72125	9.53284	9.60959	9.49949	9.71811	9.83354	10.1204	10.2844	10.4558	10.1288	10.4608	10.3062	9.62918	9.54522	9.45783	9.35867	9.95875	10.1134	10.0983	10.1596	9.77788	10.0287	10.0413	9.94717	9.75552	9.64399	9.86646	9.6896	9.6585	9.72726	9.72822	9.77026	9.77788	9.69011	9.87961	9.78187	9.54198	9.93949	9.79377	9.86131	9.70701
11716683_x_at	10.7529	10.4576	10.4205	10.0788	10.3439	9.90216	9.91249	9.90877	10.5252	10.074	10.2936	10.1704	10.3974	10.5081	10.4895	10.8298	11.0175	10.8484	10.997	10.8917	10.2096	10.0984	10.0106	9.99318	10.6681	10.7819	10.6786	10.8678	10.5463	10.503	10.5771	10.661	10.4	10.3567	10.5155	10.4642	10.3881	10.4639	10.4948	10.4836	10.5083	10.4559	10.4781	10.3129	10.4509	10.4744	10.4836	10.4305	10.5211
11717675_x_at	5.56563	5.82076	6.00499	5.45281	5.5174	5.74651	5.35054	5.08747	4.9859	5.58366	6.09295	5.60096	6.28594	6.58927	5.93193	6.37265	6.47691	6.36495	6.96842	6.94466	6.33331	6.63134	6.64771	6.39852	6.36553	6.59122	6.52624	6.6102	6.35266	4.9985	6.26395	6.32061	7.1186	7.03038	6.72709	7.30596	7.31617	7.46392	7.20321	7.01658	7.15109	7.31393	7.16679	6.91813	6.8782	7.07364	6.645	7.35501	7.37487
11718459_a_at	4.73557	5.61418	5.03186	5.58682	5.95665	5.14188	4.94129	5.50334	5.60463	5.70071	5.40331	5.79727	4.78689	4.66798	5.40879	4.76671	5.77716	5.48928	5.32832	5.86036	6.28657	6.05852	6.33957	6.29234	6.921	6.57268	6.96248	7.00542	6.71439	6.42759	6.68793	6.4058	5.2351	4.92152	5.29997	4.78482	4.74229	5.01638	4.573	5.44099	4.39649	5.35312	5.38943	5.20583	4.94959	4.69747	5.55291	4.8296	5.06707
11718460_at	5.54446	5.67502	6.14497	6.81996	6.12191	6.01387	6.39688	5.50654	6.21936	6.06076	6.9429	6.39831	6.05128	6.01122	5.79858	5.77685	6.03282	6.44069	6.7229	6.52773	6.57248	6.75372	6.6757	6.90939	7.31318	7.136	7.30046	7.21673	6.84749	5.85442	7.21281	7.14899	5.55657	5.20096	5.29336	4.76128	5.44677	5.36616	5.36814	5.34387	5.17675	5.42019	5.34707	5.66566	5.69505	5.59582	5.72905	5.55852	5.72716
11718461_at	8.66472	8.28391	8.96439	7.71849	9.14176	7.5189	8.65754	6.54455	8.75024	7.70675	9.15009	7.31628	8.55933	8.72149	8.68946	8.44973	9.11255	8.87505	9.54409	9.68106	9.62891	9.90779	9.80439	9.30491	9.57487	9.6402	9.57669	9.69135	9.75776	9.40173	9.7378	9.66425	7.46962	7.46679	7.4709	7.45246	7.46732	7.28202	7.67003	7.65114	7.5504	7.60702	7.6494	7.7048	7.56839	7.47967	7.52934	7.63304	7.26125
11719452_s_at	9.04592	8.90509	8.88016	8.99695	9.16488	8.88205	8.73972	8.93347	9.20767	8.82396	9.00231	8.8179	8.89267	8.90728	9.05265	9.12045	9.10025	9.07921	8.87486	8.65615	9.56627	9.27494	9.33159	9.10195	9.139	9.15309	9.25171	9.20749	9.24519	9.31924	9.43634	9.4771	9.62148	9.53563	9.51189	9.3747	9.3894	9.23556	9.4271	9.40498	9.62146	9.4555	9.46543	9.52142	9.52927	9.58584	9.52722	9.61805	9.44867
11720391_a_at	8.24859	6.67049	8.1266	7.02617	6.88654	8.03977	8.19882	5.15688	7.99016	8.33657	8.41293	6.99668	9.13811	8.56806	8.90352	7.24427	9.61115	8.30093	9.5326	8.50151	8.47185	8.84236	9.1859	7.66573	8.66569	9.31714	9.47706	8.84647	9.02784	9.64077	9.72748	9.61729	6.38295	6.16278	6.74937	6.83346	7.27326	7.06469	6.10077	6.33054	6.16451	6.81276	6.83462	7.14131	6.3867	6.93142	7.03965	6.29566	6.53734
11721094_a_at	6.96115	6.91702	6.62231	6.7852	6.81938	6.81524	6.49741	6.84199	7.06453	6.98079	6.55678	6.90057	6.92434	6.99606	7.0069	6.87223	6.87852	6.86519	6.85643	6.68279	6.68964	7.01137	6.43341	6.4034	6.80228	6.4955	6.75227	6.85302	6.85534	4.95196	7.23048	6.76429	7.24335	7.15742	7.02097	7.14322	6.88841	7.47229	6.9334	6.85579	6.78127	7.01237	6.87646	6.92571	6.85227	7.37254	6.9731	7.02994	6.77595
11721095_x_at	7.06819	7.26756	7.1263	7.20163	6.93166	7.67086	7.15232	7.09915	7.05082	7.62925	7.02206	7.40262	7.11403	7.24544	7.30113	7.35061	7.24921	7.24456	7.49683	7.28589	6.96815	7.0744	6.97865	7.21197	7.03812	6.87153	6.79821	6.91504	7.15984	7.07297	7.44419	7.34504	7.41549	7.1429	7.33573	7.19518	7.12637	7.59687	7.22745	7.27413	6.72287	7.38242	7.16359	7.17901	7.00065	7.37251	7.32423	7.02772	7.05948
11722285_a_at	5.21801	6.38257	5.80342	6.4733	6.19292	6.45539	5.52211	6.11794	6.17691	5.62858	6.04761	6.73747	6.13927	6.00347	6.78365	6.99058	6.16105	6.20727	5.68517	5.4325	5.67186	5.42616	6.44505	5.50499	6.29612	5.78804	6.14508	5.89382	5.90141	4.80438	5.95251	5.51808	6.03213	5.89771	6.21706	5.6514	5.91304	5.99688	5.94491	5.95435	5.86664	6.1892	5.60035	5.89273	6.05741	6.60302	6.63565	6.04654	6.05569
11722286_a_at	8.96695	9.38219	9.3191	9.15117	9.04543	9.43335	9.28425	9.28537	9.11222	9.46554	9.33587	9.33229	9.38333	9.44775	9.37972	9.77727	9.26344	9.42539	9.24435	9.29279	9.05068	9.25578	9.17384	9.11041	9.00158	8.9479	9.01097	8.983	8.71942	8.71781	8.9511	8.72032	8.29585	8.42345	8.40674	8.36153	8.27177	8.36252	8.19832	8.36197	8.37993	8.21061	8.17713	8.14656	8.55152	8.37747	8.45195	8.19013	8.31545
11722287_a_at	9.30636	9.2668	9.36834	9.23625	9.18034	9.49978	9.18982	9.50942	9.29505	9.69354	9.38639	9.34195	9.64718	9.47205	9.85105	9.70891	9.54718	9.42553	9.28323	9.2668	9.45605	9.52954	9.43838	9.5144	9.25216	9.17238	9.31308	9.21287	9.01277	8.97319	9.22719	8.81638	8.71192	8.65669	8.64638	8.62017	8.47846	8.56536	8.56737	8.73346	8.64213	8.53838	8.73493	8.55944	8.82532	8.72094	8.64026	8.52792	8.50959
11724249_a_at	9.29627	10.1366	6.16657	10.974	9.98498	9.00032	4.16146	10.9111	9.78125	9.60551	5.78415	11.2094	7.32975	6.81019	7.91265	8.69321	6.81839	6.99242	5.37495	6.56615	8.6681	6.51056	6.55551	7.95213	8.03547	8.62298	8.04274	8.43521	7.54681	7.49731	7.12308	7.32822	7.83841	8.0831	7.99838	8.17655	8.2215	7.86261	8.10468	8.11572	8.05097	8.29306	8.15134	8.27672	8.02257	7.99224	7.94382	8.03932	8.08192
11724250_a_at	3.85186	4.79446	3.67224	5.51379	4.30745	3.66058	3.10172	4.99818	3.97033	4.03611	3.0298	5.20408	3.35012	3.56447	3.65111	3.53726	3.72346	3.31295	3.20623	3.49243	4.03325	3.19535	3.57053	3.79117	3.84953	3.75106	3.68184	3.43811	3.32276	3.26052	3.31	3.64216	3.5688	3.32901	3.52224	3.42742	3.59411	3.61353	3.7024	3.71612	3.58594	4.01829	3.65763	3.67303	3.5922	3.36081	3.70927	3.85389	3.58056
11724251_x_at	4.34641	4.60769	4.09461	5.8537	4.05082	3.51349	4.07493	5.6779	3.91125	4.91259	3.36028	6.03449	3.51261	3.61531	3.6597	3.83339	3.80534	3.84495	3.83901	3.61825	4.41261	3.37683	3.60558	4.04445	3.83177	4.37508	3.83494	4.20005	3.57498	4.04727	3.51276	3.69062	3.63692	3.69935	3.31941	3.30707	3.80155	3.55613	3.77059	3.35751	3.77217	3.83093	3.45553	3.49531	3.92259	3.50708	3.49979	3.69388	3.44037
11724252_s_at	12.1693	12.9433	9.10077	12.969	12.5215	11.9953	8.46901	13.2359	12.68	12.3273	8.84551	13.1826	10.2557	9.25589	10.5561	11.347	9.3168	9.80689	8.70425	9.66725	11.7735	9.42095	9.27417	11.0965	10.9276	11.0849	10.793	11.1382	10.4187	10.6215	10.0093	9.89339	10.63	10.6031	10.6654	10.7701	10.6615	10.6738	10.6265	10.5583	10.6088	10.6081	10.6412	10.6736	10.6026	10.5419	10.4945	10.5704	10.5923
11725814_a_at	3.2583	3.62046	3.60423	3.69928	3.54904	4.04396	3.56859	3.71057	3.46003	3.48311	3.48566	3.59473	3.75302	3.49023	3.84173	3.79801	3.78838	3.91125	3.64041	3.33134	3.33951	3.84116	3.85942	3.48495	3.66678	3.3925	3.34643	3.38104	3.49375	3.57353	3.52253	3.38727	3.65075	3.67435	3.45574	3.29375	3.59512	3.44166	3.44932	3.58625	3.43121	3.645	3.49021	3.31027	3.52253	3.39744	3.71331	3.46946	3.52253
11725815_a_at	3.62086	3.2818	3.41944	3.26845	3.51464	3.21229	4.0792	3.85696	3.89062	3.37429	3.53777	3.55249	4.26443	3.28508	3.40068	3.40116	3.11944	3.29443	3.41492	3.44867	3.67787	3.37033	3.35702	3.51979	3.60102	3.79718	3.47463	3.44716	3.27686	4.67767	3.64788	3.12447	3.39407	3.69255	3.28216	3.44533	3.6683	3.63827	3.39849	3.51118	3.50938	3.14653	3.25462	3.44449	2.9603	3.393	3.17668	3.34157	3.37389
11726006_at	10.0719	8.91644	7.95486	10.6113	10.5511	9.12336	7.97472	10.7252	10.9214	8.92112	8.10808	10.7569	7.62746	8.03383	7.83355	8.77385	7.1088	9.06466	7.02255	8.30486	10.581	7.35147	7.23879	11.0698	8.40539	7.57915	7.41244	8.70246	8.73012	7.18008	7.69842	8.51739	10.3238	10.0104	10.9839	7.78772	7.56953	7.59938	8.59606	8.71498	8.87316	8.18476	8.1088	8.06494	10.9612	11.3656	11.7144	8.68207	8.3112
11726767_at	3.97738	4.0842	3.77013	4.11695	4.14664	3.86682	3.93565	3.47105	3.92539	3.75431	3.77816	4.35093	3.80956	4.72033	4.70263	4.68591	3.76314	4.19971	4.22905	4.62306	4.11387	4.64452	3.83203	4.55604	3.90001	3.95685	4.25962	4.49855	4.03787	3.68178	4.57506	4.21143	4.95668	5.0976	4.83325	5.34719	4.56771	5.22483	4.89719	5.2854	4.94613	5.17599	4.91857	4.85741	4.66829	5.14998	5.20378	5.61245	4.80537
11728506_at	3.58438	3.90196	3.45396	3.66685	3.49932	3.63998	3.20758	3.46734	3.47276	3.7255	3.58778	3.24191	3.28379	3.65904	4.10147	3.4913	3.64961	3.69868	3.73314	3.54631	3.44955	3.58992	3.57566	3.40687	3.58588	3.66044	3.70257	3.68149	3.50224	3.84676	3.42425	3.45114	3.56013	3.53298	3.64599	3.19463	3.45296	3.47645	3.83228	3.43534	3.50281	3.70192	4.18817	3.52169	3.48906	3.6773	3.66183	3.53166	3.8271
11729403_a_at	8.24354	5.89236	5.87403	6.54262	8.66518	5.92177	5.22917	5.9607	8.91713	5.91716	5.98138	6.19188	6.04819	6.27467	5.90547	5.79175	6.53556	6.29237	6.77338	6.40166	7.00801	5.82987	5.95071	6.09743	6.62548	6.07445	5.9443	6.44925	6.90844	4.88576	6.67757	7.02436	6.69689	6.99759	6.75378	6.32811	6.0398	7.01236	6.84219	6.71433	6.83294	6.82599	6.69002	6.38211	7.00345	6.77972	6.80547	6.8721	6.59875
11729744_a_at	4.35951	4.90261	4.37319	4.79732	4.92309	4.59575	4.33253	5.05425	4.75296	4.76301	4.51586	5.39592	4.44243	5.39656	5.23222	5.32834	4.97793	5.03903	4.6824	5.12572	4.8756	4.65671	4.38669	4.65363	4.85388	4.77224	4.76159	4.64606	5.13811	4.92997	4.66716	5.15819	4.96929	4.60801	4.52308	4.97921	4.79056	5.11831	4.99951	5.29311	4.66345	4.8747	4.95018	4.80074	4.75887	4.67277	4.56924	4.85626	4.96708
11733136_a_at	4.1194	3.76941	3.5414	3.77325	3.4464	3.87198	3.43587	3.67528	3.61552	3.84871	3.40152	3.94037	3.55364	3.28688	3.54012	3.71195	4.57506	3.94037	4.54472	3.75623	3.47784	3.76586	3.96629	4.1234	3.59545	4.14103	4.33426	4.12858	4.10114	3.45557	4.61175	4.33356	3.42179	3.08529	3.1417	3.33267	3.07657	3.13372	3.6265	3.1948	3.20284	3.69235	3.32778	3.46817	3.46602	3.56653	3.8624	3.30685	3.2496
11734800_at	3.45494	3.46363	3.42539	3.65898	3.32031	3.3058	3.14991	3.31461	3.77121	3.45547	3.53655	3.52665	3.22309	3.33871	3.9981	4.29144	3.77289	3.38367	4.14127	3.77121	3.50177	3.17427	3.55215	3.34452	3.15796	3.24282	3.27343	3.49873	3.45191	3.22029	3.23562	3.74606	3.74859	3.19859	3.36123	3.76016	3.09008	3.82007	3.56353	3.60277	3.71226	3.67548	3.71702	3.544	3.51935	3.67315	3.78046	3.80606	3.81259
11740764_at	6.44795	6.23013	4.92235	7.14275	6.72784	5.47333	4.80077	8.07595	5.37403	6.22474	5.24183	7.31366	4.52029	4.29727	5.40239	6.2806	4.56642	4.93899	4.62931	4.71867	5.78143	5.15123	4.95269	5.61575	5.36514	5.39464	5.37947	4.8956	4.54854	5.16491	4.7993	4.88996	5.78998	6.02612	6.2191	6.01815	5.49948	5.8925	5.87015	5.753	6.14243	5.9857	5.53266	5.88763	6.30442	5.82108	6.1407	6.01118	5.85291
11747988_a_at	3.92228	3.26236	3.54402	3.92879	3.42418	4.29955	3.54479	3.94009	3.45993	4.13127	3.4617	4.27699	3.82206	3.93236	3.58814	3.18985	4.20458	4.32538	4.63376	4.37039	3.64996	4.19454	3.55612	3.82799	3.71352	4.32776	3.86435	4.04025	3.6886	3.56389	4.16394	4.15534	3.35997	3.20517	3.11011	2.85325	3.16361	3.27135	3.21789	3.23034	3.24683	3.29585	3.4096	3.1736	3.33441	4.34263	4.05442	3.09828	3.40259
11748195_a_at	4.79173	4.52432	4.11918	4.33853	4.30595	4.32783	3.86156	3.94064	4.02245	4.68067	4.15901	4.28134	4.04883	4.60396	4.6288	4.17782	4.63616	4.34916	4.3017	3.97872	4.29519	4.19253	4.40433	4.45943	4.81692	4.50481	4.66755	4.81771	4.23533	4.23331	4.27138	4.29336	4.54971	4.22477	5.08128	4.85423	4.30822	4.25075	4.41836	4.72026	4.5398	4.70402	4.33895	4.57312	4.36876	4.81745	4.77112	4.18622	4.60744
11748617_a_at	5.81939	5.97597	6.28623	6.42967	5.78671	5.7458	6.35819	6.45803	5.96367	6.05521	5.89675	5.9542	6.60746	6.03625	6.41505	6.10149	6.27293	6.09498	5.58404	5.7558	6.10439	6.35044	6.30025	5.74469	6.1486	6.08709	6.29923	6.42611	6.2932	7.65992	6.1213	5.42832	6.96414	7.36501	7.23045	6.96046	7.56359	6.75151	6.94842	6.97649	6.82967	7.07958	7.32916	7.20971	7.07722	7.18829	6.79816	7.12805	6.94772
11748812_s_at	3.74828	3.6698	3.49726	4.00425	3.23184	3.32704	3.84889	3.09801	3.69976	3.56776	3.67306	4.48561	3.97338	3.73804	3.38633	3.76502	3.09863	3.51885	3.58284	3.99864	3.94993	3.70968	3.85447	3.59144	3.41042	3.63351	3.48892	3.39836	3.24608	3.95323	3.39138	3.41476	3.61685	3.36087	3.4812	3.73539	3.64404	3.504	3.73355	3.43443	3.56776	3.43722	3.56776	3.63419	3.48697	3.40652	3.47111	3.41878	3.16317
11748833_a_at	4.66901	3.82795	3.99644	4.19661	4.28894	3.64477	4.07693	3.84254	4.72074	3.87961	4.3427	4.34483	3.70657	4.34782	4.16962	3.87833	4.42491	4.10286	4.62284	4.50329	3.75204	3.9624	4.43392	4.03679	3.62833	3.98321	3.76892	4.43685	4.09921	4.10023	3.80837	4.0706	4.07085	3.96104	4.22265	4.00546	4.02968	4.68429	4.60375	4.49919	4.04606	4.54933	3.98665	3.86796	4.17718	4.23605	4.10023	4.10635	4.12191
11750939_a_at	7.18664	7.5001	7.06547	7.11049	7.25745	7.77023	6.63086	7.14408	7.14389	7.39527	7.09734	7.18598	6.88424	7.04561	7.4376	7.35072	7.48453	6.95332	7.39011	7.07839	7.01665	7.19803	7.52937	7.4323	6.8001	7.26085	6.88304	7.33279	7.54237	6.42084	7.51874	7.806	7.58748	7.48924	7.77277	7.59929	7.06759	7.30059	7.46097	7.41933	7.36485	7.88748	7.44242	7.52686	7.38528	7.70557	7.62347	7.47708	7.29852
11751174_a_at	3.47535	3.73891	3.61015	4.328	3.27811	4.06258	3.1572	3.78274	3.34266	3.50687	3.2184	3.56502	3.34658	4.19614	3.68431	3.78477	4.05263	3.8351	3.93558	3.58081	3.54961	3.47962	3.7177	3.46003	4.20369	3.73255	4.32037	3.70315	4.46162	3.53376	3.95397	3.95435	3.95658	3.74389	3.8912	4.01398	3.3785	3.61252	3.6907	3.48386	3.85593	3.88124	3.5736	4.01634	4.42549	4.20824	4.10438	3.74389	3.54038
11752953_a_at	3.3132	3.08372	3.1745	3.46461	3.55605	3.41821	4.00817	3.27868	3.3309	3.32561	4.21384	3.36342	4.07637	3.19647	3.33396	3.27448	3.37077	3.32074	3.50861	3.15618	3.44334	3.3498	3.47586	3.3705	3.25153	3.23148	3.31556	3.19355	3.51042	4.03535	3.1938	3.3418	3.28129	3.31315	3.80448	3.40733	3.8876	3.585	3.69871	3.53172	3.56107	3.54077	3.44334	3.39329	3.60722	3.41403	3.42597	3.34403	3.4946
11753462_a_at	3.58376	4.09175	3.9434	4.58939	4.10385	3.99866	3.98192	3.97581	4.44971	3.90179	4.78405	4.15379	3.92016	3.73693	4.57877	4.0277	4.45225	4.3545	4.40532	4.05202	4.30659	4.20975	4.70383	3.55192	4.43267	4.34898	4.56211	4.66099	4.45225	4.02012	4.48984	4.21191	4.3837	4.89109	4.63662	4.54918	4.27972	4.2068	4.89375	4.42574	4.83546	4.91039	4.81801	4.65541	4.97918	4.65974	4.5717	4.1982	4.59847
11758948_s_at	12.3146	11.262	10.7164	12.224	12.4505	11.2153	10.2395	12.2228	12.618	11.0542	10.7619	12.1237	9.83258	10.3983	9.47353	10.369	10.3004	11.5562	10.1873	11.1179	12.565	10.4451	10.3434	12.4019	11.1653	10.2457	10.0021	11.4793	11.4185	10.4691	10.6136	11.5786	11.7324	11.7133	12.0505	10.3618	10.1118	10.3459	11.3139	11.2552	11.4599	10.6494	10.6704	10.5541	12.3156	12.4836	12.4885	11.2602	11.0674
11762186_x_at	3.41981	4.01722	4.04212	3.82655	3.86926	3.92151	3.50189	3.3489	4.42982	4.16651	4.34381	4.59099	4.18129	3.94607	4.33296	4.54672	4.79385	4.63852	4.82015	4.97785	4.29725	3.98776	4.05495	4.70583	4.48875	4.08444	4.61602	4.50955	4.39969	3.81212	4.18811	4.73211	4.89317	4.69328	4.79138	4.61836	4.56354	4.64763	4.70459	4.42915	4.76224	4.58411	4.6094	4.86903	4.39747	4.86195	4.4296	4.92246	4.69627
[truncated: 29 more columns]
