# Supplementary material
Source: publisher figshare collection journal article supplement (https://plos.figshare.com/articles/dataset/_/750110)
Supplement: Supplementary file 1 [file 1 › Table_S6.xls]

## Sheet: 6h_BP_Jurkat
Table S6. GO term enrichment
Term	Count	%	PValue	Genes	List Total	Pop Hits	Pop Total	Fold Enrichment	Bonferroni	Benjamini	FDR
GO:0051789~response to protein stimulus	24	3.04956	1.46173e-10	HSP90AB1,HSPA1A,HSPA1B,SERPINH1,FOS,HSPH1,HSPA6,DNAJA1,HSPE1,HSPA4,CYR61,EGR1,HERPUD1,HSP90AA1,AARS,DDIT3,MSX1,ID2,HSPA4L,HSPB1,DNAJB2,HSPD1,DNAJB1,PPP1R15A,DNAJB6	572	107	13123	5.14594	3.49791e-07	3.49791e-07	2.56581e-07
GO:0006986~response to unfolded protein	19	2.41423	8.64904e-10	HSP90AB1,HERPUD1,HSP90AA1,AARS,HSPA1A,HSPA1B,SERPINH1,DDIT3,HSPH1,DNAJA1,HSPA4L,HSPA6,HSPB1,DNAJB2,HSPA4,HSPE1,DNAJB1,HSPD1,PPP1R15A,DNAJB6	572	71	13123	6.13949	2.06971e-06	1.03486e-06	1.51819e-06
GO:0034660~ncRNA metabolic process	28	3.55781	2.01903e-06	ELAC2,PUS1,MKI67IP,PUS7,IARS,IMP3,WDR36,RRP1B,METTL1,TFB2M,MARS2,TSEN2,NSUN2,GEMIN4,DEDD2,MARS,CARS,YARS,SARS,EXOSC4,AARS,GARS,EARS2,EIF4A3,TARS,C1ORF66,TRMT12,YARS2	572	227	13123	2.82989	0.00481988	0.00160922	0.00354399
GO:0010941~regulation of cell death	63	8.00508	9.65574e-06	CBX4,PMAIP1,FOXO3,CASP9,CDKN2C,BAG3,POU4F1,MYC,DEDD2,LTA,CD3G,SOCS2,AARS,ARHGEF16,HRK,DDIT3,MAPK1,MSX1,NME3,TNFRSF10B,BTG2,BTG1,JUN,VEGFA,UBC,HSPB1,UBB,PRNP,DCUN1D3,TRAF2,MCL1,STK17B,SOX4,TNFRSF8,ASNS,HSPA1A,HSPA1B,GCLM,SCRIB,BCL11B,PPP2CB,MTCH1,CD2,HSPE1,BCL6,RUNX3,FGD3,HSPA9,BMP4,TXNIP,MSH6,HERPUD1,GIMAP5,CEBPB,CEBPG,SMAD6,BIRC3,TAX1BP1,NOTCH1,CDKN1A,CDKN1B,DUSP1,HSPD1,DNAJB6	572	812	13123	1.78001	0.0228414	0.00575992	0.0169476
GO:0006399~tRNA metabolic process	18	2.28717	1.0493e-05	CARS,YARS,ELAC2,PUS1,SARS,AARS,GARS,PUS7,EARS2,IARS,TARS,METTL1,TRMT12,MARS2,YARS2,TSEN2,NSUN2,MARS	572	116	13123	3.56001	0.0247972	0.00500937	0.018417
GO:0042981~regulation of apoptosis	62	7.87802	1.24509e-05	CBX4,PMAIP1,FOXO3,CASP9,CDKN2C,BAG3,POU4F1,MYC,DEDD2,LTA,CD3G,SOCS2,AARS,ARHGEF16,HRK,DDIT3,MAPK1,MSX1,NME3,TNFRSF10B,BTG2,BTG1,JUN,VEGFA,UBC,HSPB1,UBB,PRNP,DCUN1D3,TRAF2,MCL1,STK17B,SOX4,TNFRSF8,ASNS,HSPA1A,HSPA1B,GCLM,SCRIB,BCL11B,PPP2CB,MTCH1,CD2,HSPE1,BCL6,RUNX3,FGD3,HSPA9,TXNIP,MSH6,HERPUD1,GIMAP5,CEBPB,CEBPG,SMAD6,BIRC3,TAX1BP1,NOTCH1,CDKN1A,CDKN1B,DUSP1,HSPD1,DNAJB6	572	801	13123	1.77581	0.0293557	0.00495355	0.0218531
GO:0043067~regulation of programmed cell death	62	7.87802	1.66913e-05	CBX4,PMAIP1,FOXO3,CASP9,CDKN2C,BAG3,POU4F1,MYC,DEDD2,LTA,CD3G,SOCS2,AARS,ARHGEF16,HRK,DDIT3,MAPK1,MSX1,NME3,TNFRSF10B,BTG2,BTG1,JUN,VEGFA,UBC,HSPB1,UBB,PRNP,DCUN1D3,TRAF2,MCL1,STK17B,SOX4,TNFRSF8,ASNS,HSPA1A,HSPA1B,GCLM,SCRIB,BCL11B,PPP2CB,MTCH1,CD2,HSPE1,BCL6,RUNX3,FGD3,HSPA9,TXNIP,MSH6,HERPUD1,GIMAP5,CEBPB,CEBPG,SMAD6,BIRC3,TAX1BP1,NOTCH1,CDKN1A,CDKN1B,DUSP1,HSPD1,DNAJB6	572	809	13123	1.75825	0.0391555	0.00568985	0.0292947
GO:0043039~tRNA aminoacylation	11	1.39771	1.80707e-05	IARS,TARS,YARS,CARS,SARS,AARS,GARS,MARS2,YARS2,MARS,EARS2	572	45	13123	5.60812	0.0423219	0.00539087	0.0317153
GO:0043038~amino acid activation	11	1.39771	1.80707e-05	IARS,TARS,YARS,CARS,SARS,AARS,GARS,MARS2,YARS2,MARS,EARS2	572	45	13123	5.60812	0.0423219	0.00539087	0.0317153
GO:0006418~tRNA aminoacylation for protein translation	11	1.39771	1.80707e-05	IARS,TARS,YARS,CARS,SARS,AARS,GARS,MARS2,YARS2,MARS,EARS2	572	45	13123	5.60812	0.0423219	0.00539087	0.0317153
GO:0046649~lymphocyte activation	23	2.92249	5.11859e-05	EGR1,KLF6,MSH6,MICB,CD3G,GIMAP5,CEBPG,RELB,SOX4,ITGA4,TPD52,IL7R,CD1D,CBLB,CXCR4,FYN,ULBP1,BCL11B,CD2,BCL6,TREML2,HSPD1,PIK3R1	572	198	13123	2.66502	0.115286	0.0135179	0.08981
GO:0010942~positive regulation of cell death	38	4.82846	6.88977e-05	TRAF2,STK17B,SOX4,TNFRSF8,PMAIP1,FOXO3,SCRIB,CASP9,CDKN2C,MTCH1,CD2,POU4F1,BCL6,MYC,RUNX3,DEDD2,LTA,FGD3,TXNIP,BMP4,MSH6,CEBPB,CEBPG,ARHGEF16,HRK,DDIT3,MAPK1,CDKN1A,NOTCH1,NME3,CDKN1B,TNFRSF10B,DUSP1,JUN,UBC,HSPD1,UBB,DCUN1D3	572	433	13123	2.01341	0.152003	0.0163526	0.120869
GO:0043065~positive regulation of apoptosis	37	4.7014	0.000117637	TRAF2,STK17B,SOX4,TNFRSF8,PMAIP1,FOXO3,SCRIB,CASP9,CDKN2C,MTCH1,CD2,POU4F1,BCL6,MYC,RUNX3,DEDD2,LTA,FGD3,TXNIP,MSH6,CEBPB,CEBPG,ARHGEF16,HRK,DDIT3,MAPK1,CDKN1A,NOTCH1,NME3,CDKN1B,TNFRSF10B,DUSP1,JUN,UBC,HSPD1,UBB,DCUN1D3	572	428	13123	1.98333	0.245365	0.0252682	0.20629
GO:0043068~positive regulation of programmed cell death	37	4.7014	0.000135516	TRAF2,STK17B,SOX4,TNFRSF8,PMAIP1,FOXO3,SCRIB,CASP9,CDKN2C,MTCH1,CD2,POU4F1,BCL6,MYC,RUNX3,DEDD2,LTA,FGD3,TXNIP,MSH6,CEBPB,CEBPG,ARHGEF16,HRK,DDIT3,MAPK1,CDKN1A,NOTCH1,NME3,CDKN1B,TNFRSF10B,DUSP1,JUN,UBC,HSPD1,UBB,DCUN1D3	572	431	13123	1.96953	0.276975	0.0266641	0.237608
GO:0010033~response to organic substance	52	6.60737	0.000365393	HSP90AB1,LDLR,PMAIP1,FOS,HSPH1,CHRNA5,SHC1,SUPT5H,MYC,CHRNA3,LTA,CYR61,EGR1,HSP90AA1,ACTA1,SOCS2,AARS,DDIT3,MAPK1,MSX1,BTG2,JUN,HSPB1,COL1A1,PPP1R15A,MCL1,HMGCS1,FHL2,ASNS,HSPA1A,HSPA1B,SERPINH1,TNFRSF1A,HSPA6,DNAJA1,HSPA4,HSPE1,NUDC,PIK3R1,BMP4,TXNIP,HERPUD1,CDKN1A,ID2,DUSP1,FYN,HSPA4L,DNAJB2,DNAJB1,HSPD1,DNAJB6,VLDLR,SLC9A1	572	718	13123	1.66156	0.582948	0.0650597	0.639448
GO:0006350~transcription	120	15.2478	0.000421515	LMO4,MORF4L2,CBX4,BBX,RORA,FOXO3,NONO,ZNF182,ZNF187,TFB2M,ZNF394,SUPT5H,ZNF576,TBPL1,RELB,DDIT3,MSX1,MTF1,TRIM33,TCFL5,ABT1,ZNF197,JUN,NFE2L3,ZNF436,CNBP,TSHZ1,SOX4,MYT1,ZNF616,PELP1,HOXA6,JUND,NKX3-1,LEO1,RUNX1,THAP11,RUNX3,NKRF,MAFG,KLF6,MAFF,SMAD6,TAF7,RYBP,SUV39H1,ZNF627,ZBTB43,ATF7IP2,POLRMT,NOTCH1,ATF3,PPRC1,ZNF410,SNORA25,ZBTB34,E2F5,GPBP1,ARID4B,ZNF295,PAX6,MKI67IP,ZNF16,ZKSCAN4,ACTR5,POU…	572	2049	13123	1.34362	0.635379	0.0695287	0.73732
GO:0012501~programmed cell death	45	5.71792	0.000507576	TRAF2,TNFRSF21,FASTKD2,MCL1,STK17B,TRIB3,PMAIP1,FOXO3,PTRH2,GRAMD4,SCRIB,TNFRSF1A,TSC22D3,CASP9,CXCR4,BAG3,CASP7,MTCH1,ZC3H12A,HSPE1,MYC,DEDD2,LTA,FGD3,CKAP2,PTPN6,RNF144B,YARS,DFFB,ARHGEF16,RYBP,HRK,TBRG4,BIRC3,TAX1BP1,DDIT4,FXR1,DNASE2,NME3,CDKN1B,TNFRSF10B,JUN,UBC,HSPD1,UBB,PPP1R15A	572	602	13123	1.71496	0.703271	0.0778024	0.887228
GO:0009612~response to mechanical stimulus	10	1.27065	0.000637953	TXNIP,BMP4,FOS,ACTA1,BTG2,FYN,JUN,COL1A1,MYC,LTA	572	56	13123	4.09684	0.782837	0.091031	1.11392
GO:0045449~regulation of transcription	142	18.0432	0.000646015	LMO4,SNIP1,MORF4L2,BBX,CBX4,RORA,FOXO3,NONO,ZNF182,ZNF187,TFB2M,ZNF394,TIGD5,SUPT5H,ZNF576,TBPL1,PCBD1,RELB,SIX6,DDIT3,MAPK1,MSX1,MTF1,TRIM33,TCFL5,ZNF197,ABT1,JUN,VEGFA,NFE2L3,ZNF436,CNBP,TSHZ1,SOX4,MYT1,ZNF616,HOXA6,JUND,LEO1,NKX3-1,RUNX1,THAP11,RUNX3,RHEBL1,HNRNPAB,NKRF,MAFG,BMP4,KLF6,MAFF,SMAD6,TAF7,SUV39H1,RYBP,ZNF627,ZBTB43,ATF7IP2,NOTCH1,CDKN1B,ATF3,ETS2,PPRC1,DNAJB6,ZNF410,SNORA25,ZBTB34,…	572	2528	13123	1.28869	0.78699	0.0869508	1.12793
GO:0006915~apoptosis	44	5.59085	0.000684821	TRAF2,TNFRSF21,FASTKD2,MCL1,STK17B,TRIB3,PMAIP1,FOXO3,PTRH2,GRAMD4,SCRIB,TNFRSF1A,TSC22D3,CASP9,CXCR4,BAG3,CASP7,MTCH1,ZC3H12A,HSPE1,MYC,DEDD2,LTA,FGD3,CKAP2,PTPN6,RNF144B,YARS,DFFB,ARHGEF16,RYBP,HRK,TBRG4,BIRC3,TAX1BP1,DDIT4,FXR1,DNASE2,NME3,TNFRSF10B,JUN,UBC,HSPD1,UBB,PPP1R15A	572	593	13123	1.7023	0.805891	0.0870501	1.1953
GO:0009069~serine family amino acid metabolic process	7	0.889454	0.000721947	CTH,SHMT2,DHFRL1,PSAT1,PSPH,GCLM,CBS	572	26	13123	6.17678	0.822404	0.0869459	1.25971
GO:0043066~negative regulation of apoptosis	30	3.81194	0.000776466	MCL1,CBX4,SOX4,HSPA1A,ASNS,HSPA1B,GCLM,BCL11B,BAG3,PPP2CB,BCL6,MYC,HSPA9,GIMAP5,CEBPB,SOCS2,SMAD6,AARS,HRK,BIRC3,TAX1BP1,CDKN1A,NOTCH1,MSX1,BTG2,VEGFA,UBC,HSPB1,HSPD1,UBB,PRNP	572	353	13123	1.94977	0.844141	0.0887521	1.35423
GO:0022613~ribonucleoprotein complex biogenesis	19	2.41423	0.000809464	GTPBP4,TSR1,SURF6,EXOSC4,BYSL,MBNL1,SFRS1,EIF4A3,RCL1,IMP3,C1ORF66,WDR36,RRP1B,DDX23,RRS1,TFB2M,SLU7,GEMIN6,GEMIN4	572	179	13123	2.43522	0.855984	0.0881481	1.4114
GO:0045321~leukocyte activation	23	2.92249	0.000843246	EGR1,KLF6,MSH6,MICB,CD3G,GIMAP5,CEBPG,RELB,SOX4,ITGA4,TPD52,IL7R,CD1D,CBLB,CXCR4,FYN,ULBP1,BCL11B,CD2,BCL6,TREML2,HSPD1,PIK3R1	572	241	13123	2.18951	0.867177	0.0876767	1.46989
GO:0009070~serine family amino acid biosynthetic process	5	0.635324	0.00091633	CTH,DHFRL1,PSAT1,PSPH,CBS	572	11	13123	10.4283	0.888506	0.0909743	1.59632
GO:0043069~negative regulation of programmed cell death	30	3.81194	0.000968548	MCL1,CBX4,SOX4,HSPA1A,ASNS,HSPA1B,GCLM,BCL11B,BAG3,PPP2CB,BCL6,MYC,HSPA9,GIMAP5,CEBPB,SOCS2,SMAD6,AARS,HRK,BIRC3,TAX1BP1,CDKN1A,NOTCH1,MSX1,BTG2,VEGFA,UBC,HSPB1,HSPD1,UBB,PRNP	572	358	13123	1.92254	0.901614	0.0920982	1.68656
GO:0009451~RNA modification	9	1.14358	0.000989907	C1ORF66,METTL3,PUS1,RPUSD2,METTL1,RPUSD1,TFB2M,NSUN2,PUS7	572	48	13123	4.30168	0.906521	0.0904459	1.72345
GO:0060548~negative regulation of cell death	30	3.81194	0.00101274	MCL1,CBX4,SOX4,HSPA1A,ASNS,HSPA1B,GCLM,BCL11B,BAG3,PPP2CB,BCL6,MYC,HSPA9,GIMAP5,CEBPB,SOCS2,SMAD6,AARS,HRK,BIRC3,TAX1BP1,CDKN1A,NOTCH1,MSX1,BTG2,VEGFA,UBC,HSPB1,HSPD1,UBB,PRNP	572	359	13123	1.91718	0.911497	0.0890421	1.76287
GO:0042110~T cell activation	15	1.90597	0.00115258	EGR1,MICB,CD3G,GIMAP5,RELB,SOX4,IL7R,CD1D,CBLB,CXCR4,FYN,BCL11B,CD2,HSPD1,TREML2	572	126	13123	2.73123	0.936691	0.0971619	2.00398
GO:0006457~protein folding	18	2.28717	0.0012697	HSP90AB1,GRPEL2,GRPEL1,HSP90AA1,FKBP4,AARS,NKTR,DNAJB9,BAG3,DNAJA1,HSPA4L,DNAJB2,HSPE1,DNAJB1,HSPD1,AHSA1,DNAJB6,HSPA9	572	171	13123	2.41498	0.95218	0.102895	2.20547
GO:0044265~cellular macromolecule catabolic process	49	6.22618	0.00168748	USPL1,LDLR,UBE2G2,CBX4,MYLIP,MAP1LC3B,WIBG,PSMD5,MYC,DEDD2,ZFP36,PAN2,ABCE1,SOCS2,FBXL20,DFFB,UBR4,HERC4,UBR2,UBE2H,EIF4A3,TRIM33,UBC,CAND2,KLHL12,UBB,CHFR,FBXO11,USP30,UBA7,HSPA1A,HSPA1B,ASB13,FEM1A,CYLD,CACYBP,PPP2CB,USP36,FBXO8,FBXO46,CCNB1IP1,RNF144B,SPSB2,SUGT1,UBE2Q1,DNASE2,CBLB,FBXO32,TBL1X,USP44	572	713	13123	1.57668	0.98243	0.130089	2.92107
GO:0030098~lymphocyte differentiation	13	1.65184	0.00169201	EGR1,KLF6,GIMAP5,CEBPG,RELB,SOX4,ITGA4,IL7R,TPD52,CD1D,BCL11B,BCL6,PIK3R1	572	103	13123	2.89563	0.98262	0.126354	2.9288
GO:0002520~immune system development	24	3.04956	0.0021897	EGR1,BMP4,KLF6,MSH6,GIMAP5,CEBPG,RELB,TIPARP,SOX4,ITGA4,TPD52,IL7R,CD1D,DNASE2,SNRK,ID2,BCL11B,VEGFA,SH2B3,BCL6,HSPD1,RUNX1,LTA,PIK3R1	572	276	13123	1.99498	0.99473	0.155673	3.77476
GO:0042254~ribosome biogenesis	14	1.77891	0.00231309	GTPBP4,TSR1,SURF6,EXOSC4,BYSL,RCL1,EIF4A3,C1ORF66,IMP3,WDR36,RRP1B,RRS1,TFB2M,GEMIN4	572	121	13123	2.65448	0.99608	0.15901	3.98342
GO:0008219~cell death	48	6.09911	0.00257494	MICB,FASTKD2,FOXO3,PMAIP1,CASP9,CXCR4,CASP7,BAG3,MYC,LTA,DEDD2,YARS,DFFB,HRK,ARHGEF16,TBRG4,DDIT4,TNFRSF10B,NME3,JUN,UBC,HSPB1,UBB,PPP1R15A,TNFRSF21,TRAF2,MCL1,STK17B,TRIB3,PTRH2,GRAMD4,SCRIB,TNFRSF1A,TSC22D3,MTCH1,ZC3H12A,HSPE1,FGD3,CKAP2,RNF144B,PTPN6,GARS,RYBP,BIRC3,TAX1BP1,FXR1,DNASE2,CDKN1B,HSPD1	572	709	13123	1.55322	0.997908	0.170525	4.42481
GO:0016265~death	48	6.09911	0.00291576	MICB,FASTKD2,FOXO3,PMAIP1,CASP9,CXCR4,CASP7,BAG3,MYC,LTA,DEDD2,YARS,DFFB,HRK,ARHGEF16,TBRG4,DDIT4,TNFRSF10B,NME3,JUN,UBC,HSPB1,UBB,PPP1R15A,TNFRSF21,TRAF2,MCL1,STK17B,TRIB3,PTRH2,GRAMD4,SCRIB,TNFRSF1A,TSC22D3,MTCH1,ZC3H12A,HSPE1,FGD3,CKAP2,RNF144B,PTPN6,GARS,RYBP,BIRC3,TAX1BP1,FXR1,DNASE2,CDKN1B,HSPD1	572	714	13123	1.54234	0.999077	0.185775	4.99645
GO:0001775~cell activation	24	3.04956	0.00313926	EGR1,KLF6,MSH6,MICB,CD3G,GIMAP5,CEBPG,RELB,SOX4,ITGA4,TPD52,IL7R,CD1D,CBLB,CXCR4,FYN,ULBP1,BCL11B,CD2,BCL6,TREML2,HSPD1,LTA,PIK3R1	572	284	13123	1.93879	0.99946	0.193437	5.36956
GO:0030097~hemopoiesis	21	2.66836	0.00341484	BMP4,EGR1,KLF6,GIMAP5,CEBPG,RELB,TIPARP,SOX4,ITGA4,TPD52,IL7R,CD1D,DNASE2,SNRK,ID2,BCL11B,VEGFA,SH2B3,BCL6,RUNX1,PIK3R1	572	236	13123	2.04148	0.999721	0.203382	5.82771
GO:0006563~L-serine metabolic process	4	0.508259	0.00389452	SHMT2,PSAT1,PSPH,CBS	572	8	13123	11.4712	0.999912	0.223045	6.62019
GO:0009057~macromolecule catabolic process	50	6.35324	0.00449163	USPL1,LDLR,UBE2G2,CBX4,MYLIP,MAP1LC3B,WIBG,PSMD5,MYC,DEDD2,ZFP36,PAN2,ABCE1,HYAL2,SOCS2,FBXL20,DFFB,UBR4,HERC4,UBR2,UBE2H,EIF4A3,TRIM33,UBC,CAND2,KLHL12,UBB,CHFR,FBXO11,USP30,UBA7,HSPA1A,HSPA1B,ASB13,FEM1A,CYLD,CACYBP,PPP2CB,USP36,FBXO8,FBXO46,CCNB1IP1,RNF144B,SPSB2,SUGT1,UBE2Q1,DNASE2,CBLB,FBXO32,TBL1X,USP44	572	768	13123	1.49364	0.999979	0.24685	7.59789
GO:0043632~modification-dependent macromolecule catabolic process	39	4.95553	0.00466245	USP30,USPL1,UBE2G2,CBX4,UBA7,ASB13,MYLIP,FEM1A,CYLD,MAP1LC3B,PPP2CB,CACYBP,USP36,PSMD5,FBXO8,FBXO46,CCNB1IP1,PAN2,RNF144B,SOCS2,FBXL20,SPSB2,UBR4,HERC4,UBR2,UBE2H,SUGT1,UBE2Q1,CBLB,TRIM33,UBC,KLHL12,CAND2,FBXO32,UBB,CHFR,TBL1X,USP44,FBXO11	572	562	13123	1.59208	0.999986	0.249302	7.8758
GO:0019941~modification-dependent protein catabolic process	39	4.95553	0.00466245	USP30,USPL1,UBE2G2,CBX4,UBA7,ASB13,MYLIP,FEM1A,CYLD,MAP1LC3B,PPP2CB,CACYBP,USP36,PSMD5,FBXO8,FBXO46,CCNB1IP1,PAN2,RNF144B,SOCS2,FBXL20,SPSB2,UBR4,HERC4,UBR2,UBE2H,SUGT1,UBE2Q1,CBLB,TRIM33,UBC,KLHL12,CAND2,FBXO32,UBB,CHFR,TBL1X,USP44,FBXO11	572	562	13123	1.59208	0.999986	0.249302	7.8758
GO:0048534~hemopoietic or lymphoid organ development	22	2.79543	0.00474046	EGR1,BMP4,KLF6,GIMAP5,CEBPG,RELB,TIPARP,SOX4,ITGA4,TPD52,IL7R,CD1D,DNASE2,SNRK,ID2,BCL11B,VEGFA,SH2B3,BCL6,RUNX1,LTA,PIK3R1	572	260	13123	1.94127	0.999988	0.247438	8.00247
GO:0001558~regulation of cell growth	18	2.28717	0.00478876	TMEM97,IL9R,SOCS2,MORF4L2,OSGIN1,CTH,CDKN1A,TSPYL2,CDKN1B,ULK1,CDKN2C,BTG1,RASGRP2,BCL6,OGFR,DCUN1D3,SERTAD1,CYR61	572	194	13123	2.12867	0.99999	0.244346	8.08081
GO:0007050~cell cycle arrest	12	1.52478	0.00511209	CDKN1A,CDKN1B,CDKN2C,SGSM3,WDR6,TBRG4,HBP1,CDKN3,SESN2,PPP1R15A,MYC,DDIT3	572	103	13123	2.67289	0.999995	0.253242	8.60359
GO:0008652~cellular amino acid biosynthetic process	8	1.01652	0.00624552	CTH,PLOD1,DHFRL1,ASNS,THNSL1,PSAT1,PSPH,CBS	572	51	13123	3.59879	1	0.294367	10.4142
GO:0007005~mitochondrion organization	14	1.77891	0.00632549	GRPEL2,GRPEL1,GIMAP5,HSP90AA1,TMEM70,PMAIP1,TIMM44,POLRMT,CASP7,GFM1,JUN,TFB2M,HSPA4,MYC	572	136	13123	2.36171	1	0.29186	10.5406
GO:0034470~ncRNA processing	17	2.1601	0.00656156	ELAC2,PUS1,EXOSC4,SARS,AARS,PUS7,EIF4A3,C1ORF66,IMP3,WDR36,RRP1B,METTL1,TRMT12,TFB2M,TSEN2,NSUN2,GEMIN4	572	184	13123	2.11967	1	0.295368	10.913
GO:0007049~cell cycle	49	6.22618	0.00656597	PKMYT1,FAM83D,NDE1,MC1R,RNF103,DDX12,CDKN2C,H2AFX,PSMD5,SUPT5H,MYC,TUBB3,CEP110,TBRG4,BANP,UBR2,DDIT3,MAPK1,CHMP1B,SGSM3,UBC,PELO,UBB,CHFR,PPP1R15A,RCC1,SESN2,CYLD,TSPYL2,SAC3D1,CENPA,CLASP1,HBP1,LFNG,NUDC,CKAP2,TXNIP,MSH6,WDR6,SUV39H1,CENPF,ILF3,SUGT1,CDKN3,CDKN1A,CDKN1B,RGS2,DUSP1,CKS2,RRS1	572	766	13123	1.46759	1	0.290149	10.9199
GO:0030308~negative regulation of cell growth	11	1.39771	0.00657015	CDKN1A,CTH,CDKN1B,TSPYL2,ULK1,BTG1,CDKN2C,BCL6,OSGIN1,DCUN1D3,SERTAD1	572	92	13123	2.7431	1	0.285107	10.9265
GO:0043281~regulation of caspase activity	10	1.27065	0.00660283	HERPUD1,TNFRSF10B,CASP9,SMAD6,MTCH1,HSPE1,PMAIP1,HSPD1,MYC,DNAJB6	572	78	13123	2.94132	1	0.281271	10.9779
GO:0042127~regulation of cell proliferation	50	6.35324	0.00681399	PAX6,CDKN2C,SHC1,ASPH,MYC,SERTAD1,LTA,GNL3,GTPBP4,TBRG4,MYCN,MXD4,CIAO1,MAPK1,CTH,MSX1,TCFL5,BTG2,BTG1,JUN,ZMIZ1,VEGFA,BTG3,CNBP,FGFR3,SOX4,TNFRSF8,FTH1,RAC2,BCL11B,NKX3-1,POU3F2,BCL6,RUNX3,BMP4,MAFG,TXNIP,PTPN6,WDR6,TPD52L2,GAS8,CDKN3,NOTCH1,CBLB,CDKN1A,ATF3,CDKN1B,ID2,DBP,TOB1	572	786	13123	1.45943	1	0.283883	11.3095
GO:0008285~negative regulation of cell proliferation	27	3.43075	0.008162	PAX6,TNFRSF8,FTH1,CDKN2C,BCL11B,NKX3-1,BCL6,ASPH,LTA,RUNX3,BMP4,PTPN6,GTPBP4,WDR6,CDKN3,GAS8,MXD4,CDKN1A,CBLB,CTH,CDKN1B,MSX1,BTG2,BTG1,JUN,BTG3,TOB1	572	361	13123	1.71591	1	0.324455	13.3989
GO:0045926~negative regulation of growth	12	1.52478	0.00833173	CDKN1A,CTH,CDKN1B,TSPYL2,ULK1,BTG1,CDKN2C,LGMN,BCL6,OSGIN1,DCUN1D3,SERTAD1	572	110	13123	2.5028	1	0.324685	13.6587
GO:0009309~amine biosynthetic process	10	1.27065	0.00842568	CTH,PLOD1,DHFRL1,ETNK1,ASNS,THNSL1,PSAT1,PSPH,AMD1,CBS	572	81	13123	2.83238	1	0.322527	13.8021
GO:0052548~regulation of endopeptidase activity	10	1.27065	0.00842568	HERPUD1,TNFRSF10B,CASP9,SMAD6,MTCH1,HSPE1,PMAIP1,HSPD1,MYC,DNAJB6	572	81	13123	2.83238	1	0.322527	13.8021
GO:0045786~negative regulation of cell cycle	10	1.27065	0.00842568	BMP4,CDKN1A,CDKN1B,TSPYL2,BTG3,CENPF,BCL6,DCUN1D3,SCRIB,RUNX3	572	81	13123	2.83238	1	0.322527	13.8021
GO:0000079~regulation of cyclin-dependent protein kinase activity	8	1.01652	0.00854508	CDKN1A,GTPBP4,CDKN1B,CDKN2C,CKS2,PKMYT1,CDKN3,SERTAD1	572	54	13123	3.39886	1	0.321232	13.9841
GO:0008361~regulation of cell size	18	2.28717	0.00860739	IL9R,FGFR3,ACTA1,SLC3A2,OSGIN1,CSRP2,IL7R,CTH,CDKN1A,TSPYL2,CDKN1B,ULK1,CDKN2C,BTG1,BCL6,DCUN1D3,SERTAD1,SLC9A1	572	206	13123	2.00467	1	0.318246	14.079
GO:0051603~proteolysis involved in cellular protein catabolic process	39	4.95553	0.00954459	USP30,USPL1,UBE2G2,CBX4,UBA7,ASB13,MYLIP,FEM1A,CYLD,MAP1LC3B,PPP2CB,CACYBP,USP36,PSMD5,FBXO8,FBXO46,CCNB1IP1,PAN2,RNF144B,SOCS2,FBXL20,SPSB2,UBR4,HERC4,UBR2,UBE2H,SUGT1,UBE2Q1,CBLB,TRIM33,UBC,KLHL12,CAND2,FBXO32,UBB,CHFR,TBL1X,USP44,FBXO11	572	588	13123	1.52168	1	0.341158	15.4936
GO:0051726~regulation of cell cycle	25	3.17662	0.00969451	PKMYT1,ASNS,RCC1,SCRIB,TSPYL2,CDKN2C,BCL6,H2AFX,MYC,LTA,SERTAD1,RUNX3,BMP4,GTPBP4,SMAD6,CENPF,CDKN3,CDKN1A,CDKN1B,ID2,JUN,BTG3,CKS2,DCUN1D3,CHFR	572	330	13123	1.73805	1	0.34051	15.7179
GO:0000041~transition metal ion transport	9	1.14358	0.00990171	ATP2C1,SLC30A1,FKBP4,SLC30A2,SLC31A2,SLC40A1,FTH1,SCO2,FTL	572	69	13123	2.99247	1	0.341486	16.0269
GO:0044257~cellular protein catabolic process	39	4.95553	0.0104006	USP30,USPL1,UBE2G2,CBX4,UBA7,ASB13,MYLIP,FEM1A,CYLD,MAP1LC3B,PPP2CB,CACYBP,USP36,PSMD5,FBXO8,FBXO46,CCNB1IP1,PAN2,RNF144B,SOCS2,FBXL20,SPSB2,UBR4,HERC4,UBR2,UBE2H,SUGT1,UBE2Q1,CBLB,TRIM33,UBC,KLHL12,CAND2,FBXO32,UBB,CHFR,TBL1X,USP44,FBXO11	572	591	13123	1.51396	1	0.350375	16.7665
GO:0060323~head morphogenesis	4	0.508259	0.010407	TIPARP,ANKRD11,ASPH,COL1A1	572	11	13123	8.34266	1	0.345781	16.776
GO:0045792~negative regulation of cell size	11	1.39771	0.0108498	CDKN1A,CTH,CDKN1B,TSPYL2,ULK1,BTG1,CDKN2C,BCL6,OSGIN1,DCUN1D3,SERTAD1	572	99	13123	2.54915	1	0.352793	17.4272
GO:0052547~regulation of peptidase activity	10	1.27065	0.0114214	HERPUD1,TNFRSF10B,CASP9,SMAD6,MTCH1,HSPE1,PMAIP1,HSPD1,MYC,DNAJB6	572	85	13123	2.6991	1	0.362776	18.2608
GO:0051153~regulation of striated muscle cell differentiation	6	0.762389	0.011653	BMP4,NOTCH1,BTG1,MORF4L2,UBC,UBB	572	32	13123	4.30168	1	0.363907	18.5963
GO:0015804~neutral amino acid transport	5	0.635324	0.0117614	SLC1A4,SLC1A5,SLC6A9,SLC3A2,SLC7A5	572	21	13123	5.46245	1	0.361986	18.7529
GO:0002521~leukocyte differentiation	13	1.65184	0.0117658	EGR1,KLF6,GIMAP5,CEBPG,RELB,SOX4,ITGA4,IL7R,TPD52,CD1D,BCL11B,BCL6,PIK3R1	572	131	13123	2.27672	1	0.357596	18.7592
GO:0006412~translation	24	3.04956	0.0122884	CARS,YARS,SARS,EIF5,AARS,GARS,MRPS6,LRRC47,PTRH2,RPL28,EARS2,RPL10L,IARS,TARS,CYLD,GFM1,UBC,MARS2,MRPL18,PELO,UBB,YARS2,MRP63,MARS	572	319	13123	1.72607	1	0.365681	19.51
GO:0006396~RNA processing	36	4.57433	0.0125219	ELAC2,PUS1,SYNCRIP,DGCR14,PUS7,NONO,PPAN,RBM4B,IMP3,WDR36,DDX46,RRP1B,DDX23,METTL1,TFB2M,TSEN2,GEMIN6,NSUN2,GEMIN4,DEDD2,ZCCHC8,ZFP36,SARS,EXOSC4,AARS,MBNL1,SFRS1,PRPF4,SFRS2,HNRPDL,EIF4A3,C1ORF66,TRMT12,SYF2,SLU7,RBM17	572	541	13123	1.52666	1	0.366744	19.8434
GO:0040008~regulation of growth	25	3.17662	0.0140983	IL9R,LGMN,MORF4L2,OSGIN1,AGPAT6,TSPYL2,CDKN2C,RASGRP2,BCL6,SHC1,POU3F2,SERTAD1,CYR61,TMEM97,SOCS2,C20ORF20,CDKN1A,CTH,CDKN1B,BTG1,ULK1,UBC,OGFR,UBB,DCUN1D3	572	341	13123	1.68199	1	0.397775	22.0601
GO:0051173~positive regulation of nitrogen compound metabolic process	41	5.20966	0.0143809	HSP90AB1,CNBP,MORF4L2,PAX6,FHL2,SOX4,FOXO3,RORA,TNFRSF1A,FOS,BCL11B,POU3F2,H2AFX,SHC1,RUNX1,SUPT5H,MYC,SERTAD1,HNRNPAB,BMP4,EGR1,KLF6,HSP90AA1,CEBPB,PCBD1,SOX11,CEBPG,TAF7,ILF3,NPAS4,DDIT3,MAPK1,NOTCH1,MTF1,ZMIZ1,JUN,ETS2,VEGFA,UBC,UBB,TBL1X	572	643	13123	1.46288	1	0.399357	22.4513
GO:0008033~tRNA processing	9	1.14358	0.0147932	ELAC2,PUS1,SARS,METTL1,TRMT12,AARS,TSEN2,NSUN2,PUS7	572	74	13123	2.79028	1	0.403621	23.0189
GO:0031328~positive regulation of cellular biosynthetic process	43	5.46379	0.015113	HSP90AB1,CNBP,MORF4L2,PAX6,FHL2,SOX4,TNFRSF8,FOXO3,RORA,TNFRSF1A,FOS,WIBG,BCL11B,POU3F2,SHC1,RUNX1,SUPT5H,FAM129A,MYC,SERTAD1,HNRNPAB,BMP4,EGR1,KLF6,HSP90AA1,CEBPB,PCBD1,SOX11,CEBPG,TAF7,ILF3,NPAS4,DDIT3,MAPK1,NOTCH1,MTF1,ZMIZ1,JUN,ETS2,VEGFA,UBC,UBB,TBL1X	572	684	13123	1.44228	1	0.405831	23.4562
GO:0006357~regulation of transcription from RNA polymerase II promoter	45	5.71792	0.0152972	CNBP,MORF4L2,CBX4,PAX6,FHL2,RORA,FOXO3,BUD31,TNFRSF1A,FOS,BCL11B,JUND,CHD2,CHD1,POU3F2,BCL6,POU4F1,RUNX1,SUPT5H,MYC,BMP4,EGR1,KLF6,CEBPB,SOX11,CEBPG,TAF7,RYBP,FOSB,NPAS4,STAT2,MYCN,MXD4,CIAO1,NOTCH1,MSX1,MTF1,ID2,DBP,ZMIZ1,JUN,VEGFA,TCEB3,TBL1X,ZFP161	572	724	13123	1.42597	1	0.40522	23.7071
GO:0030163~protein catabolic process	39	4.95553	0.0160267	USP30,USPL1,UBE2G2,CBX4,UBA7,ASB13,MYLIP,FEM1A,CYLD,MAP1LC3B,PPP2CB,CACYBP,USP36,PSMD5,FBXO8,FBXO46,CCNB1IP1,PAN2,RNF144B,SOCS2,FBXL20,SPSB2,UBR4,HERC4,UBR2,UBE2H,SUGT1,UBE2Q1,CBLB,TRIM33,UBC,KLHL12,CAND2,FBXO32,UBB,CHFR,TBL1X,USP44,FBXO11	572	610	13123	1.4668	1	0.415489	24.6932
GO:0042113~B cell activation	9	1.14358	0.0171723	KLF6,MSH6,CEBPG,BCL6,ITGA4,HSPD1,TPD52,IL7R,PIK3R1	572	76	13123	2.71685	1	0.433236	26.2175
GO:0010557~positive regulation of macromolecule biosynthetic process	41	5.20966	0.0178564	CNBP,MORF4L2,PAX6,FHL2,SOX4,TNFRSF8,FOXO3,RORA,TNFRSF1A,FOS,WIBG,BCL11B,POU3F2,SHC1,RUNX1,SUPT5H,FAM129A,MYC,SERTAD1,HNRNPAB,BMP4,EGR1,KLF6,CEBPB,PCBD1,SOX11,CEBPG,TAF7,ILF3,NPAS4,DDIT3,MAPK1,NOTCH1,MTF1,ZMIZ1,JUN,ETS2,VEGFA,UBC,UBB,TBL1X	572	652	13123	1.44269	1	0.441587	27.1138
GO:0051252~regulation of RNA metabolic process	95	12.0712	0.018071	E2F5,MORF4L2,SNIP1,PAX6,CBX4,SYNCRIP,RORA,FOXO3,BUD31,ZKSCAN4,FOS,ZNF182,ZNF187,TFB2M,POU4F1,ZNF394,SUPT5H,MYB,MYC,TBPL1,EGR1,ZFP36,ZNF548,SOX11,RELB,FOSB,NPAS4,MBNL1,SIX6,DDIT3,MYCN,MXD4,CIAO1,MSX1,MTF1,TCFL5,POGK,ZNF197,JUN,ZMIZ1,VEGFA,JMJD1C,NFE2L3,ZFP161,ZNF436,ZNF275,IRX3,CNBP,TSHZ1,IRX5,SOX4,FHL2,MYT1,GRAMD4,C5ORF41,ZNF616,TNFRSF1A,TSC22D3,XBP1,HOXA6,BCL11B,JUND,CHD2,NKX3-1,CHD1,BCL6,POU3F2…	572	1757	13123	1.24048	1	0.441141	27.3928
GO:0009891~positive regulation of biosynthetic process	43	5.46379	0.0182732	HSP90AB1,CNBP,MORF4L2,PAX6,FHL2,SOX4,TNFRSF8,FOXO3,RORA,TNFRSF1A,FOS,WIBG,BCL11B,POU3F2,SHC1,RUNX1,SUPT5H,FAM129A,MYC,SERTAD1,HNRNPAB,BMP4,EGR1,KLF6,HSP90AA1,CEBPB,PCBD1,SOX11,CEBPG,TAF7,ILF3,NPAS4,DDIT3,MAPK1,NOTCH1,MTF1,ZMIZ1,JUN,ETS2,VEGFA,UBC,UBB,TBL1X	572	693	13123	1.42355	1	0.440486	27.6548
GO:0034622~cellular macromolecular complex assembly	23	2.92249	0.018445	HIST2H2AA3,HSP90AA1,TSR1,FKBP4,CENPF,TMEM70,MBNL1,TSPYL4,SFRS1,TTLL3,TSPYL2,DDX23,HIST1H2BK,MC1R,CENPA,SLU7,HSPA4,H2AFX,HSPD1,GEMIN6,CHRNA3,SCO2,GEMIN4,TUBB3	572	313	13123	1.68586	1	0.439309	27.8768
GO:0030099~myeloid cell differentiation	10	1.27065	0.0197064	DNASE2,BMP4,GIMAP5,ID2,SNRK,CEBPG,RELB,VEGFA,BCL6,RUNX1	572	93	13123	2.46691	1	0.456985	29.4865
GO:0010171~body morphogenesis	4	0.508259	0.0208363	TIPARP,ANKRD11,ASPH,COL1A1	572	14	13123	6.55495	1	0.471559	30.8996
GO:0060322~head development	4	0.508259	0.0208363	TIPARP,ANKRD11,ASPH,COL1A1	572	14	13123	6.55495	1	0.471559	30.8996
GO:0001522~pseudouridine synthesis	4	0.508259	0.0208363	PUS1,RPUSD2,RPUSD1,PUS7	572	14	13123	6.55495	1	0.471559	30.8996
GO:0045941~positive regulation of transcription	36	4.57433	0.0213082	CNBP,MORF4L2,PAX6,FHL2,SOX4,FOXO3,RORA,TNFRSF1A,FOS,BCL11B,POU3F2,RUNX1,SUPT5H,MYC,SERTAD1,HNRNPAB,BMP4,EGR1,KLF6,CEBPB,PCBD1,SOX11,TAF7,ILF3,NPAS4,DDIT3,MAPK1,NOTCH1,MTF1,ZMIZ1,JUN,ETS2,VEGFA,UBC,UBB,TBL1X	572	563	13123	1.467	1	0.474954	31.4818
GO:0048742~regulation of skeletal muscle fiber development	5	0.635324	0.0216833	BMP4,NOTCH1,BTG1,UBC,UBB	572	25	13123	4.58846	1	0.476721	31.9413
GO:0045935~positive regulation of nucleobase, nucleoside, nucleotide and nucleic acid metabolic process	39	4.95553	0.0219717	CNBP,MORF4L2,PAX6,FHL2,SOX4,FOXO3,RORA,TNFRSF1A,FOS,BCL11B,POU3F2,SHC1,H2AFX,RUNX1,SUPT5H,MYC,SERTAD1,HNRNPAB,BMP4,EGR1,KLF6,CEBPB,PCBD1,SOX11,CEBPG,TAF7,ILF3,NPAS4,DDIT3,MAPK1,NOTCH1,MTF1,ZMIZ1,JUN,ETS2,VEGFA,UBC,UBB,TBL1X	572	623	13123	1.4362	1	0.477091	32.2927
GO:0016072~rRNA metabolic process	10	1.27065	0.0223227	EIF4A3,IMP3,C1ORF66,WDR36,RRP1B,EXOSC4,TFB2M,MKI67IP,DEDD2,GEMIN4	572	95	13123	2.41498	1	0.478417	32.718
GO:0019882~antigen processing and presentation	8	1.01652	0.0223664	MICB,RAET1G,ULBP1,RELB,HLA-A,CD1A,CD1E,CD1D	572	65	13123	2.82367	1	0.475028	32.7707
GO:0006355~regulation of transcription, DNA-dependent	92	11.69	0.0249129	E2F5,MORF4L2,SNIP1,PAX6,CBX4,RORA,FOXO3,BUD31,ZKSCAN4,FOS,ZNF182,ZNF187,TFB2M,POU4F1,ZNF394,SUPT5H,MYB,MYC,TBPL1,EGR1,ZNF548,SOX11,RELB,FOSB,NPAS4,SIX6,DDIT3,MYCN,MXD4,CIAO1,MSX1,MTF1,TCFL5,POGK,ZNF197,JUN,ZMIZ1,VEGFA,JMJD1C,NFE2L3,ZFP161,ZNF436,ZNF275,IRX3,CNBP,IRX5,TSHZ1,SOX4,FHL2,MYT1,GRAMD4,C5ORF41,ZNF616,TNFRSF1A,TSC22D3,XBP1,HOXA6,BCL11B,JUND,CHD2,NKX3-1,CHD1,BCL6,POU3F2,RUNX1,ETV5,RUNX3,HN…	572	1717	13123	1.22929	1	0.508481	35.7791
GO:0006534~cysteine metabolic process	3	0.381194	0.0252285	CTH,GCLM,CBS	572	6	13123	11.4712	1	0.50885	36.1431
GO:0051147~regulation of muscle cell differentiation	6	0.762389	0.0260125	BMP4,NOTCH1,BTG1,MORF4L2,UBC,UBB	572	39	13123	3.52959	1	0.515658	37.0386
GO:0006919~activation of caspase activity	7	0.889454	0.0268291	TNFRSF10B,CASP9,MTCH1,HSPE1,PMAIP1,HSPD1,MYC	572	53	13123	3.03012	1	0.522664	37.9588
GO:0006351~transcription, DNA-dependent	21	2.66836	0.0294009	MAFF,POLR3H,CEBPB,LMO4,TAF7,POLR1C,MKI67IP,DDIT3,CD3EAP,POLRMT,TCFL5,ABT1,TCEB3,TFB2M,SUPT5H,NFE2L3,GTF3C2,MYC,TBPL1,RUNX3,GTF3C3	572	291	13123	1.65563	1	0.551737	40.7747
GO:0006511~ubiquitin-dependent protein catabolic process	18	2.28717	0.0299322	PAN2,RNF144B,USP30,USPL1,UBE2G2,UBR2,UBE2H,CYLD,PPP2CB,UBC,USP36,UBB,PSMD5,CHFR,TBL1X,FBXO8,FBXO11,USP44	572	237	13123	1.74245	1	0.554259	41.3411
GO:0007090~regulation of S phase of mitotic cell cycle	4	0.508259	0.0300605	SMAD6,BCL6,DCUN1D3,RCC1	572	16	13123	5.73558	1	0.551846	41.4772
GO:0010628~positive regulation of gene expression	36	4.57433	0.0310411	CNBP,MORF4L2,PAX6,FHL2,SOX4,FOXO3,RORA,TNFRSF1A,FOS,BCL11B,POU3F2,RUNX1,SUPT5H,MYC,SERTAD1,HNRNPAB,BMP4,EGR1,KLF6,CEBPB,PCBD1,SOX11,TAF7,ILF3,NPAS4,DDIT3,MAPK1,NOTCH1,MTF1,ZMIZ1,JUN,ETS2,VEGFA,UBC,UBB,TBL1X	572	580	13123	1.42401	1	0.559658	42.5071
GO:0032774~RNA biosynthetic process	21	2.66836	0.033325	MAFF,POLR3H,CEBPB,LMO4,TAF7,POLR1C,MKI67IP,DDIT3,CD3EAP,POLRMT,TCFL5,ABT1,TCEB3,TFB2M,SUPT5H,NFE2L3,GTF3C2,MYC,TBPL1,RUNX3,GTF3C3	572	295	13123	1.63318	1	0.581929	44.84
GO:0045944~positive regulation of transcription from RNA polymerase II promoter	25	3.17662	0.0333402	CNBP,MORF4L2,PAX6,FOXO3,RORA,FOS,TNFRSF1A,BCL11B,POU3F2,SUPT5H,RUNX1,MYC,EGR1,BMP4,KLF6,CEBPB,SOX11,TAF7,NPAS4,NOTCH1,MTF1,JUN,ZMIZ1,VEGFA,TBL1X	572	370	13123	1.55016	1	0.578201	44.8552
GO:0051131~chaperone-mediated protein complex assembly	3	0.381194	0.0343139	HSP90AA1,HSPA4,HSPD1	572	7	13123	9.83242	1	0.585021	45.8222
GO:0006916~anti-apoptosis	16	2.03304	0.0343183	CEBPB,SOCS2,MCL1,HRK,CBX4,HSPA1A,HSPA1B,BIRC3,TAX1BP1,BAG3,VEGFA,UBC,HSPB1,UBB,PRNP,MYC,HSPA9	572	205	13123	1.79062	1	0.581249	45.8265
GO:0048641~regulation of skeletal muscle tissue development	5	0.635324	0.0355444	BMP4,NOTCH1,BTG1,UBC,UBB	572	29	13123	3.95557	1	0.590512	47.0213
GO:0030218~erythrocyte differentiation	6	0.762389	0.0377942	DNASE2,BMP4,ID2,CEBPG,VEGFA,BCL6	572	43	13123	3.20125	1	0.609671	49.1492
GO:0006917~induction of apoptosis	22	2.79543	0.0378027	MSH6,CEBPB,CEBPG,ARHGEF16,HRK,STK17B,FOXO3,PMAIP1,MAPK1,CDKN1A,TNFRSF10B,CDKN1B,NME3,CDKN2C,UBC,CD2,UBB,MYC,RUNX3,LTA,FGD3,DEDD2	572	318	13123	1.5872	1	0.606028	49.1571
GO:0012502~induction of programmed cell death	22	2.79543	0.0388294	MSH6,CEBPB,CEBPG,ARHGEF16,HRK,STK17B,FOXO3,PMAIP1,MAPK1,CDKN1A,TNFRSF10B,CDKN1B,NME3,CDKN2C,UBC,CD2,UBB,MYC,RUNX3,LTA,FGD3,DEDD2	572	319	13123	1.58223	1	0.612371	50.1009
GO:0043280~positive regulation of caspase activity	7	0.889454	0.0395194	TNFRSF10B,CASP9,MTCH1,HSPE1,PMAIP1,HSPD1,MYC	572	58	13123	2.7689	1	0.615319	50.726
GO:0010952~positive regulation of peptidase activity	7	0.889454	0.0395194	TNFRSF10B,CASP9,MTCH1,HSPE1,PMAIP1,HSPD1,MYC	572	58	13123	2.7689	1	0.615319	50.726
GO:0006865~amino acid transport	9	1.14358	0.0396412	SLC25A12,SLC1A4,SLC1A5,SLC6A9,SLC38A2,SLC7A1,SLC3A2,SLC7A5,SLC7A11	572	89	13123	2.32001	1	0.612853	50.8356
GO:0006333~chromatin assembly or disassembly	11	1.39771	0.039981	HIST2H2AA3,TSPYL2,HIST1H2BK,CENPA,ARID4B,CHD2,SUV39H1,CBX4,CHD1,H2AFX,TSPYL4	572	122	13123	2.06857	1	0.612468	51.14
GO:0009303~rRNA transcription	4	0.508259	0.0410891	CD3EAP,MKI67IP,GTF3C2,GTF3C3	572	18	13123	5.09829	1	0.619176	52.1206
GO:0045893~positive regulation of transcription, DNA-dependent	30	3.81194	0.0420141	CNBP,MORF4L2,PAX6,FHL2,SOX4,FOXO3,RORA,FOS,TNFRSF1A,BCL11B,POU3F2,RUNX1,SUPT5H,MYC,HNRNPAB,BMP4,EGR1,KLF6,CEBPB,SOX11,TAF7,ILF3,NPAS4,NOTCH1,MTF1,ZMIZ1,JUN,ETS2,VEGFA,TBL1X	572	476	13123	1.44594	1	0.624019	52.9248
GO:0042326~negative regulation of phosphorylation	6	0.762389	0.0447315	CDKN1A,CDKN1B,CDKN2C,JUN,SMAD6,FAM129A	572	45	13123	3.05897	1	0.644104	55.2146
GO:0051254~positive regulation of RNA metabolic process	30	3.81194	0.0459579	CNBP,MORF4L2,PAX6,FHL2,SOX4,FOXO3,RORA,FOS,TNFRSF1A,BCL11B,POU3F2,RUNX1,SUPT5H,MYC,HNRNPAB,BMP4,EGR1,KLF6,CEBPB,SOX11,TAF7,ILF3,NPAS4,NOTCH1,MTF1,ZMIZ1,JUN,ETS2,VEGFA,TBL1X	572	480	13123	1.43389	1	0.650829	56.2132
GO:0022402~cell cycle process	34	4.3202	0.0465271	PKMYT1,SESN2,RCC1,FAM83D,NDE1,MC1R,SAC3D1,CENPA,CDKN2C,CLASP1,H2AFX,HBP1,PSMD5,MYC,LFNG,NUDC,TUBB3,MSH6,WDR6,CENPF,TBRG4,UBR2,ILF3,CDKN3,SUGT1,DDIT3,CDKN1A,CDKN1B,SGSM3,UBC,CKS2,RRS1,UBB,CHFR,PPP1R15A	572	559	13123	1.39542	1	0.652042	56.6694
GO:0000245~spliceosome assembly	5	0.635324	0.0486386	DDX23,SLU7,MBNL1,SFRS1,GEMIN6	572	32	13123	3.58474	1	0.665347	58.3233
GO:0016049~cell growth	7	0.889454	0.0486955	FGFR3,ACTA1,ULK1,SLC3A2,IL7R,CSRP2,SLC9A1	572	61	13123	2.63272	1	0.66244	58.3671
GO:0016071~mRNA metabolic process	24	3.04956	0.0524486	SYNCRIP,HSPA1A,HSPA1B,DGCR14,NONO,RBM4B,DDX46,DDX23,WIBG,GEMIN6,TSEN2,GEMIN4,ZCCHC8,ZFP36,PAN2,CEBPG,MBNL1,SFRS1,PRPF4,SFRS2,EIF4A3,VEGFA,SYF2,SLU7,RBM17	572	368	13123	1.49624	1	0.686967	61.1579
GO:0033261~regulation of S phase	4	0.508259	0.0538653	SMAD6,BCL6,DCUN1D3,RCC1	572	20	13123	4.58846	1	0.693656	62.1648
GO:0030858~positive regulation of epithelial cell differentiation	3	0.381194	0.0555393	NOTCH1,BTG1,PAX6	572	9	13123	7.64744	1	0.701826	63.3228
GO:0060325~face morphogenesis	3	0.381194	0.0555393	TIPARP,ASPH,COL1A1	572	9	13123	7.64744	1	0.701826	63.3228
GO:0034621~cellular macromolecular complex subunit organization	23	2.92249	0.0561854	HIST2H2AA3,HSP90AA1,TSR1,FKBP4,CENPF,TMEM70,MBNL1,TSPYL4,SFRS1,TTLL3,TSPYL2,DDX23,HIST1H2BK,MC1R,CENPA,SLU7,HSPA4,H2AFX,HSPD1,GEMIN6,CHRNA3,SCO2,GEMIN4,TUBB3	572	352	13123	1.49907	1	0.702942	63.7607
GO:0010563~negative regulation of phosphorus metabolic process	6	0.762389	0.0564736	CDKN1A,CDKN1B,CDKN2C,JUN,SMAD6,FAM129A	572	48	13123	2.86779	1	0.701692	63.9545
GO:0030183~B cell differentiation	6	0.762389	0.0564736	KLF6,CEBPG,BCL6,ITGA4,TPD52,PIK3R1	572	48	13123	2.86779	1	0.701692	63.9545
GO:0045936~negative regulation of phosphate metabolic process	6	0.762389	0.0564736	CDKN1A,CDKN1B,CDKN2C,JUN,SMAD6,FAM129A	572	48	13123	2.86779	1	0.701692	63.9545
GO:0009991~response to extracellular stimulus	16	2.03304	0.0572699	BMP4,MICB,ACTA1,STC2,HRK,ASNS,ENSA,DDIT3,FOS,CDKN1A,DUSP1,JUN,COL1A1,OGT,LTA,VLDLR	572	220	13123	1.66853	1	0.70377	64.4848
GO:0034976~response to endoplasmic reticulum stress	5	0.635324	0.0586552	HERPUD1,AARS,FAM129A,PPP1R15A,DDIT3	572	34	13123	3.37387	1	0.709542	65.3898
GO:0051052~regulation of DNA metabolic process	10	1.27065	0.0604136	MSH6,GTPBP4,TSPYL2,JUN,CEBPG,H2AFX,BCL6,SHC1,IL7R,MYC	572	114	13123	2.01248	1	0.717404	66.5073
GO:0034101~erythrocyte homeostasis	6	0.762389	0.0607452	DNASE2,BMP4,ID2,CEBPG,VEGFA,BCL6	572	49	13123	2.80926	1	0.716407	66.7141
GO:0030514~negative regulation of BMP signaling pathway	4	0.508259	0.0608826	TRIM33,SOSTDC1,SMAD6,TOB1	572	21	13123	4.36996	1	0.714248	66.7995
GO:0030968~endoplasmic reticulum unfolded protein response	4	0.508259	0.0608826	HERPUD1,AARS,PPP1R15A,DDIT3	572	21	13123	4.36996	1	0.714248	66.7995
GO:0001836~release of cytochrome c from mitochondria	4	0.508259	0.0608826	JUN,CASP7,PMAIP1,MYC	572	21	13123	4.36996	1	0.714248	66.7995
GO:0006024~glycosaminoglycan biosynthetic process	4	0.508259	0.0608826	XYLT2,B3GALT6,CHST7,CHST12	572	21	13123	4.36996	1	0.714248	66.7995
GO:0034620~cellular response to unfolded protein	4	0.508259	0.0608826	HERPUD1,AARS,PPP1R15A,DDIT3	572	21	13123	4.36996	1	0.714248	66.7995
GO:0048754~branching morphogenesis of a tube	7	0.889454	0.0628157	BMP4,NOTCH1,CXCR4,VEGFA,NKX3-1,CYR61,MYCN	572	65	13123	2.47071	1	0.722804	67.9789
GO:0006401~RNA catabolic process	7	0.889454	0.0628157	ZFP36,PAN2,EIF4A3,ABCE1,WIBG,HSPA1A,HSPA1B,DEDD2	572	65	13123	2.47071	1	0.722804	67.9789
GO:0030217~T cell differentiation	7	0.889454	0.0628157	EGR1,GIMAP5,BCL11B,RELB,SOX4,IL7R,CD1D	572	65	13123	2.47071	1	0.722804	67.9789
GO:0006984~ER-nuclear signaling pathway	5	0.635324	0.0640442	HERPUD1,INSIG1,AARS,PPP1R15A,DDIT3	572	35	13123	3.27747	1	0.726989	68.7077
GO:0030005~cellular di-, tri-valent inorganic cation homeostasis	16	2.03304	0.0647058	HERPUD1,OPRL1,CXCR3,BUD31,FTH1,CCR7,CXCR4,ATP2C1,SLC30A1,MT2A,PRNP,MT1H,MYC,SLC40A1,SCO2,FTL	572	224	13123	1.63874	1	0.727861	69.0937
GO:0008380~RNA splicing	19	2.41423	0.0651823	SYNCRIP,MBNL1,SFRS1,PRPF4,DGCR14,SFRS2,NONO,EIF4A3,PPAN,RBM4B,DDX46,DDX23,SYF2,SLU7,GEMIN6,TSEN2,GEMIN4,ZCCHC8,RBM17	572	281	13123	1.55126	1	0.727682	69.369
GO:0016202~regulation of striated muscle tissue development	6	0.762389	0.0651952	BMP4,NOTCH1,BTG1,UBC,CENPF,UBB	572	50	13123	2.75308	1	0.724906	69.3764
GO:0006839~mitochondrial transport	7	0.889454	0.0666857	SLC25A12,GRPEL2,GRPEL1,HSP90AA1,GIMAP5,UCP1,TIMM44	572	66	13123	2.43328	1	0.73037	70.2222
GO:0042088~T-helper 1 type immune response	3	0.381194	0.0674694	IL18BP,RELB,VEGFA	572	10	13123	6.88269	1	0.731851	70.6581
GO:0006878~cellular copper ion homeostasis	3	0.381194	0.0674694	MT2A,PRNP,SCO2	572	10	13123	6.88269	1	0.731851	70.6581
GO:0001510~RNA methylation	3	0.381194	0.0674694	METTL3,TFB2M,NSUN2	572	10	13123	6.88269	1	0.731851	70.6581
GO:0007346~regulation of mitotic cell cycle	12	1.52478	0.0677851	SMAD6,BTG3,CENPF,PKMYT1,BCL6,ASNS,DCUN1D3,CHFR,RCC1,MYC,SCRIB,LTA	572	152	13123	1.81123	1	0.730789	70.832
GO:0008633~activation of pro-apoptotic gene products	4	0.508259	0.0683024	TRAF2,TNFRSF10B,MYC,DEDD2	572	22	13123	4.17133	1	0.730822	71.1148
GO:0045930~negative regulation of mitotic cell cycle	4	0.508259	0.0683024	BTG3,BCL6,DCUN1D3,SCRIB	572	22	13123	4.17133	1	0.730822	71.1148
GO:0043525~positive regulation of neuron apoptosis	4	0.508259	0.0683024	CASP9,JUN,HRK,LTA	572	22	13123	4.17133	1	0.730822	71.1148
GO:0015837~amine transport	10	1.27065	0.0688537	SLC25A12,SLC1A4,SLC1A5,SLC6A9,SLC38A2,SLC7A1,TAF7,SLC3A2,SLC7A5,SLC7A11	572	117	13123	1.96088	1	0.731038	71.4134
GO:0048634~regulation of muscle development	6	0.762389	0.0698227	BMP4,NOTCH1,BTG1,UBC,CENPF,UBB	572	51	13123	2.6991	1	0.733446	71.9311
GO:0019725~cellular homeostasis	28	3.55781	0.0701154	MCL1,CXCR3,GCLM,BUD31,FTH1,MBP,CXCR4,SLC30A1,POU3F2,MT1H,MYC,SCO2,CHRNA3,DEDD2,FTL,MAFG,HERPUD1,GIMAP5,OPRL1,PFKM,DDIT3,CCR7,ATP2C1,JUN,MT2A,CLCN6,PRNP,SLC40A1	572	460	13123	1.39649	1	0.732295	72.0857
GO:0010608~posttranscriptional regulation of gene expression	15	1.90597	0.0725169	ZFP36,GTPBP4,EIF5,MKNK2,SOX4,SYNCRIP,EIF4A3,MAPK1,WIBG,VEGFA,HSPB1,HSPD1,FAM129A,TNRC6B,PPP1R15A	572	209	13123	1.64658	1	0.74192	73.3245
GO:0045859~regulation of protein kinase activity	22	2.79543	0.0760299	TRAF2,GTPBP4,TAF7,TRIB3,PKMYT1,CDKN3,SPRY4,SPRY1,CDKN1A,TSPYL2,TNFRSF10B,CDKN1B,CXCR4,CDKN2C,SPRED2,CKS2,SHC1,DUSP8,CHRNA3,SERTAD1,CBS,VLDLR	572	345	13123	1.46299	1	0.756381	75.0435
GO:0006023~aminoglycan biosynthetic process	4	0.508259	0.0761102	XYLT2,B3GALT6,CHST7,CHST12	572	23	13123	3.98997	1	0.754198	75.0815
GO:0009628~response to abiotic stimulus	23	2.92249	0.0782595	BMP4,TXNIP,MSH6,MICB,ACTA1,FOS,CDKN1A,DUSP1,BTG2,MC1R,CASP9,FYN,JUN,CASP7,SLC2A1,HSPB1,HSPA4,H2AFX,COL1A1,DCUN1D3,MYC,LTA,TUBB3,SLC9A1	572	366	13123	1.44173	1	0.761621	76.0797
GO:0043414~biopolymer methylation	7	0.889454	0.0791102	FOS,METTL3,BTG2,BTG1,SUV39H1,TFB2M,NSUN2	572	69	13123	2.32748	1	0.762966	76.4643
GO:0022618~ribonucleoprotein complex assembly	7	0.889454	0.0791102	TSR1,DDX23,SLU7,MBNL1,SFRS1,GEMIN6,GEMIN4	572	69	13123	2.32748	1	0.762966	76.4643
GO:0045661~regulation of myoblast differentiation	3	0.381194	0.08015	BMP4,NOTCH1,BTG1	572	11	13123	6.25699	1	0.765128	76.9264
GO:0055070~copper ion homeostasis	3	0.381194	0.08015	MT2A,PRNP,SCO2	572	11	13123	6.25699	1	0.765128	76.9264
GO:0060324~face development	3	0.381194	0.08015	TIPARP,ASPH,COL1A1	572	11	13123	6.25699	1	0.765128	76.9264
GO:0010812~negative regulation of cell-substrate adhesion	3	0.381194	0.08015	BCL6,COL1A1,PIK3R1	572	11	13123	6.25699	1	0.765128	76.9264
GO:0032535~regulation of cellular component size	18	2.28717	0.080929	IL9R,FGFR3,ACTA1,SLC3A2,OSGIN1,CSRP2,IL7R,CTH,CDKN1A,TSPYL2,CDKN1B,ULK1,CDKN2C,BTG1,BCL6,DCUN1D3,SERTAD1,SLC9A1	572	270	13123	1.52949	1	0.766103	77.267
GO:0030003~cellular cation homeostasis	17	2.1601	0.0813272	MAFG,HERPUD1,OPRL1,CXCR3,BUD31,FTH1,CCR7,CXCR4,ATP2C1,SLC30A1,MT2A,PRNP,MT1H,MYC,SLC40A1,SCO2,FTL	572	251	13123	1.55386	1	0.765408	77.4393
GO:0006873~cellular ion homeostasis	23	2.92249	0.0838593	MAFG,HERPUD1,GIMAP5,OPRL1,CXCR3,BUD31,GCLM,FTH1,MBP,CCR7,CXCR4,ATP2C1,SLC30A1,JUN,MT2A,POU3F2,PRNP,SLC40A1,MT1H,MYC,CHRNA3,SCO2,FTL	572	369	13123	1.43001	1	0.77383	78.5063
GO:0006469~negative regulation of protein kinase activity	8	1.01652	0.0842713	CDKN1A,SPRY1,CDKN1B,TAF7,SPRED2,TRIB3,DUSP8,SPRY4	572	87	13123	2.10964	1	0.773175	78.6753
GO:0006437~tyrosyl-tRNA aminoacylation	2	0.25413	0.0851327	YARS,YARS2	572	2	13123	22.9423	1	0.774391	79.0247
GO:0051365~cellular response to potassium ion starvation	2	0.25413	0.0851327	JUN,HRK	572	2	13123	22.9423	1	0.774391	79.0247
GO:0006431~methionyl-tRNA aminoacylation	2	0.25413	0.0851327	MARS2,MARS	572	2	13123	22.9423	1	0.774391	79.0247
GO:0034619~cellular chaperone-mediated protein complex assembly	2	0.25413	0.0851327	HSP90AA1,HSPA4	572	2	13123	22.9423	1	0.774391	79.0247
GO:0070814~hydrogen sulfide biosynthetic process	2	0.25413	0.0851327	CTH,CBS	572	2	13123	22.9423	1	0.774391	79.0247
GO:0019344~cysteine biosynthetic process	2	0.25413	0.0851327	CTH,CBS	572	2	13123	22.9423	1	0.774391	79.0247
GO:0070813~hydrogen sulfide metabolic process	2	0.25413	0.0851327	CTH,CBS	572	2	13123	22.9423	1	0.774391	79.0247
GO:0055066~di-, tri-valent inorganic cation homeostasis	16	2.03304	0.0888355	HERPUD1,OPRL1,CXCR3,BUD31,FTH1,CCR7,CXCR4,ATP2C1,SLC30A1,MT2A,PRNP,MT1H,MYC,SLC40A1,SCO2,FTL	572	235	13123	1.56203	1	0.786903	80.466
GO:0042542~response to hydrogen peroxide	6	0.762389	0.0900811	TXNIP,DUSP1,JUN,PPP2CB,COL1A1,DDIT3	572	55	13123	2.5028	1	0.789427	80.9294
GO:0008283~cell proliferation	26	3.30368	0.092031	IL9R,CLK1,TXLNA,IL7R,PSPH,SCRIB,FTH1,NDE1,CXCR4,INSIG1,POU3F2,MYC,NUDC,RUNX3,CYR61,BMP4,SOX11,CENPF,MXD1,CSRP2,LAMP3,FYN,VEGFA,CKS2,PELO,HSPD1	572	433	13123	1.3776	1	0.794521	81.6342
GO:0050680~negative regulation of epithelial cell proliferation	4	0.508259	0.0928283	CDKN1B,PAX6,NKX3-1,RUNX3	572	25	13123	3.67077	1	0.795247	81.9153
GO:0016051~carbohydrate biosynthetic process	9	1.14358	0.0944199	GLT25D2,ATF3,XYLT2,B3GALT6,CHST7,CHST12,PCK2,PMM2,ACN9	572	107	13123	1.92973	1	0.798834	82.4642
GO:0055082~cellular chemical homeostasis	23	2.92249	0.0952768	MAFG,HERPUD1,GIMAP5,OPRL1,CXCR3,BUD31,GCLM,FTH1,MBP,CCR7,CXCR4,ATP2C1,SLC30A1,JUN,MT2A,POU3F2,PRNP,SLC40A1,MT1H,MYC,CHRNA3,SCO2,FTL	572	375	13123	1.40713	1	0.799726	82.7532
GO:0006979~response to oxidative stress	12	1.52478	0.0959295	TXNIP,FOS,MICB,DUSP1,MTF1,JUN,PPP2CB,COL1A1,PRNP,ETV5,GCLM,DDIT3	572	162	13123	1.69943	1	0.799885	82.9703
GO:0033673~negative regulation of kinase activity	8	1.01652	0.0967367	CDKN1A,SPRY1,CDKN1B,TAF7,SPRED2,TRIB3,DUSP8,SPRY4	572	90	13123	2.03932	1	0.800584	83.2352
GO:0042592~homeostatic process	41	5.20966	0.0968667	PTGES3,LDLR,MCL1,CXCR3,FOXO3,IL7R,BUD31,GCLM,FTH1,MBP,RAC2,CXCR4,SLC30A1,ANKRD11,POU3F2,BCL6,MT1H,MYC,DEDD2,SCO2,CHRNA3,FTL,MAFG,BMP4,HERPUD1,GIMAP5,OPRL1,CEBPG,PFKM,DDIT3,DNASE2,CCR7,ID2,ATP2C1,JUN,VEGFA,MT2A,PRNP,CLCN6,SLC40A1,SLC9A1	572	744	13123	1.26429	1	0.798914	83.2775
GO:0043549~regulation of kinase activity	22	2.79543	0.0980291	TRAF2,GTPBP4,TAF7,TRIB3,PKMYT1,CDKN3,SPRY4,SPRY1,CDKN1A,TSPYL2,TNFRSF10B,CDKN1B,CXCR4,CDKN2C,SPRED2,CKS2,SHC1,DUSP8,CHRNA3,SERTAD1,CBS,VLDLR	572	357	13123	1.41381	1	0.800847	83.6513

## Sheet: 24h_BP_Jurkat
Table S6. GO term enrichment
Term	Count	%	PValue	Genes	List Total	Pop Hits	Pop Total	Fold Enrichment	Bonferroni	Benjamini	FDR
GO:0051789~response to protein stimulus	13	7.06522	1.19385e-09	EGR1,HSPA1A,HSPA1B,SERPINH1,DDIT3,FOS,ID2,HSPA6,DNAJB2,HSPD1,DNAJB1,DNAJC3,PPP1R15A,CYR61	139	107	13123	11.4704	1.52574e-06	1.52574e-06	1.94518e-06
GO:0006986~response to unfolded protein	9	4.8913	7.43108e-07	HSPA6,DNAJB2,HSPA1A,DNAJB1,HSPD1,HSPA1B,DNAJC3,SERPINH1,PPP1R15A,DDIT3	139	71	13123	11.9675	0.000949241	0.000474733	0.00121077
GO:0010033~response to organic substance	24	13.0435	1.55169e-06	HMGCS1,PRKDC,ASNS,HSPA1A,HSPA1B,SERPINH1,FOS,HSPA6,GNG4,DNAJC3,SUPT5H,PIK3R1,CYR61,EGR1,SOCS2,ACTA1,DDIT3,MAPK1,CDKN1A,ID2,JUN,DNAJB2,HSPD1,DNAJB1,PPP1R15A	139	718	13123	3.15577	0.00198109	0.0006608	0.00252819
GO:0009991~response to extracellular stimulus	10	5.43478	0.000524845	FOS,CDKN1A,ACTA1,STC2,JUN,CTSD,ASNS,ENSA,HSPA5,DDIT3	139	220	13123	4.29137	0.488766	0.15442	0.851726
GO:0031668~cellular response to extracellular stimulus	6	3.26087	0.000554285	FOS,CDKN1A,JUN,CTSD,ASNS,HSPA5	139	64	13123	8.85094	0.507653	0.132131	0.899298
GO:0042981~regulation of apoptosis	20	10.8696	0.00071254	PTPRC,YWHAZ,SOCS2,AIFM1,LGALS1,PRKDC,HSPA1A,ASNS,HSPA1B,DDIT3,MAPK1,SON,CDKN1A,CDKN2C,JUN,BAG3,FOXC1,HSPA5,HSPD1,LTB,DEDD2	139	801	13123	2.35731	0.597858	0.140861	1.15466
GO:0043067~regulation of programmed cell death	20	10.8696	0.000802933	PTPRC,YWHAZ,SOCS2,AIFM1,LGALS1,PRKDC,HSPA1A,ASNS,HSPA1B,DDIT3,MAPK1,SON,CDKN1A,CDKN2C,JUN,BAG3,FOXC1,HSPA5,HSPD1,LTB,DEDD2	139	809	13123	2.33399	0.641763	0.136405	1.30025
GO:0010941~regulation of cell death	20	10.8696	0.000839296	PTPRC,YWHAZ,SOCS2,AIFM1,LGALS1,PRKDC,HSPA1A,ASNS,HSPA1B,DDIT3,MAPK1,SON,CDKN1A,CDKN2C,JUN,BAG3,FOXC1,HSPA5,HSPD1,LTB,DEDD2	139	812	13123	2.32537	0.658043	0.125527	1.35875
GO:0008219~cell death	18	9.78261	0.00122907	AIFM1,LGALS1,PRKDC,TRIB3,SETX,TMEM173,PAK2,JUN,BAG3,CTSD,ZC3H12A,SPG21,HSPD1,PPP2R2B,GADD45B,LTB,PPP1R15A,DEDD2	139	709	13123	2.39687	0.792312	0.160237	1.98386
GO:0016265~death	18	9.78261	0.00132621	AIFM1,LGALS1,PRKDC,TRIB3,SETX,TMEM173,PAK2,JUN,BAG3,CTSD,ZC3H12A,SPG21,HSPD1,PPP2R2B,GADD45B,LTB,PPP1R15A,DEDD2	139	714	13123	2.38009	0.816588	0.155999	2.13906
GO:0051726~regulation of cell cycle	11	5.97826	0.00254382	PTPRC,CDKN1A,ID2,CDKN2C,JUN,PKMYT1,FOXC1,ASNS,ZBTB17,GADD45B,LTB	139	330	13123	3.147	0.961425	0.256155	4.06508
GO:0009267~cellular response to starvation	4	2.17391	0.00451532	JUN,CTSD,ASNS,HSPA5	139	32	13123	11.8013	0.996923	0.382435	7.10834
GO:0034637~cellular carbohydrate biosynthetic process	5	2.71739	0.00596873	ATF3,MAT2B,PCK2,NANP,ACN9	139	69	13123	6.84131	0.999524	0.444857	9.29358
GO:0008361~regulation of cell size	8	4.34783	0.00608946	CDKN1A,ACTA1,ULK1,CDKN2C,HBEGF,CYFIP1,EMP3,GNG4	139	206	13123	3.66641	0.999593	0.427407	9.47292
GO:0046364~monosaccharide biosynthetic process	4	2.17391	0.00680853	ATF3,PCK2,NANP,ACN9	139	37	13123	10.2065	0.999839	0.44126	10.5341
GO:0042493~response to drug	8	4.34783	0.00745121	FOS,CDKN1A,DGCR2,YWHAZ,JUN,HMGCS1,DDIT3,MVP	139	214	13123	3.52935	0.999929	0.449756	11.4727
GO:0042594~response to starvation	4	2.17391	0.00968369	JUN,CTSD,ASNS,HSPA5	139	42	13123	8.99144	0.999996	0.518829	14.6619
GO:0040008~regulation of growth	10	5.43478	0.00993514	CDKN1A,AGPAT6,SOCS2,PAK2,ULK1,CDKN2C,HBEGF,FOXC1,GNG4,CYR61	139	341	13123	2.76862	0.999997	0.507826	15.0142
GO:0009719~response to endogenous stimulus	11	5.97826	0.0102758	MAPK1,FOS,CDKN1A,SOCS2,ACTA1,HMGCS1,PRKDC,ASNS,GNG4,DDIT3,PIK3R1	139	404	13123	2.57057	0.999998	0.500806	15.4895
GO:0012501~programmed cell death	14	7.6087	0.0108404	AIFM1,LGALS1,TRIB3,PRKDC,TMEM173,PAK2,JUN,BAG3,ZC3H12A,HSPD1,GADD45B,PPP1R15A,LTB,DEDD2	139	602	13123	2.19558	0.999999	0.501664	16.2714
GO:0046165~alcohol biosynthetic process	4	2.17391	0.0110031	ATF3,PCK2,NANP,ACN9	139	44	13123	8.58273	0.999999	0.489993	16.4957
GO:0031669~cellular response to nutrient levels	4	2.17391	0.0110031	JUN,CTSD,ASNS,HSPA5	139	44	13123	8.58273	0.999999	0.489993	16.4957
GO:0042326~negative regulation of phosphorylation	4	2.17391	0.0116999	PTPRC,CDKN1A,CDKN2C,JUN	139	45	13123	8.39201	1	0.495236	17.449
GO:0043066~negative regulation of apoptosis	10	5.43478	0.0122575	CDKN1A,SON,YWHAZ,SOCS2,BAG3,FOXC1,ASNS,HSPA1A,HSPA5,HSPD1,HSPA1B	139	353	13123	2.67451	1	0.496062	18.2047
GO:0046777~protein amino acid autophosphorylation	5	2.71739	0.0122957	PAK2,ULK1,DYRK1A,TRIM28,CLK1	139	85	13123	5.55353	1	0.48253	18.2561
GO:0006469~negative regulation of protein kinase activity	5	2.71739	0.0133025	PTPRC,CDKN1A,PAK2,TRIB3,GADD45B	139	87	13123	5.42587	1	0.4957	19.6032
GO:0043069~negative regulation of programmed cell death	10	5.43478	0.0133367	CDKN1A,SON,YWHAZ,SOCS2,BAG3,FOXC1,ASNS,HSPA1A,HSPA5,HSPD1,HSPA1B	139	358	13123	2.63715	1	0.483128	19.6486
GO:0060548~negative regulation of cell death	10	5.43478	0.0135607	CDKN1A,SON,YWHAZ,SOCS2,BAG3,FOXC1,ASNS,HSPA1A,HSPA5,HSPD1,HSPA1B	139	359	13123	2.62981	1	0.476001	19.9454
GO:0045936~negative regulation of phosphate metabolic process	4	2.17391	0.0139399	PTPRC,CDKN1A,CDKN2C,JUN	139	48	13123	7.86751	1	0.473094	20.4453
GO:0010563~negative regulation of phosphorus metabolic process	4	2.17391	0.0139399	PTPRC,CDKN1A,CDKN2C,JUN	139	48	13123	7.86751	1	0.473094	20.4453
GO:0045935~positive regulation of nucleobase, nucleoside, nucleotide and nucleic acid metabolic process	14	7.6087	0.0141065	EGR1,PTPRC,TRIM28,TTF1,PRKDC,ILF3,DDIT3,FOS,MAPK1,JUN,FOXC1,KLF2,SUPT5H,HNRNPAB	139	623	13123	2.12157	1	0.465319	20.664
GO:0033673~negative regulation of kinase activity	5	2.71739	0.0149087	PTPRC,CDKN1A,PAK2,TRIB3,GADD45B	139	90	13123	5.245	1	0.472651	21.7093
GO:0043065~positive regulation of apoptosis	11	5.97826	0.0149138	MAPK1,PTPRC,CDKN1A,AIFM1,CDKN2C,JUN,PRKDC,HSPD1,LTB,DEDD2,DDIT3	139	428	13123	2.42643	1	0.461767	21.7159
GO:0009628~response to abiotic stimulus	10	5.43478	0.0152084	FOS,PITPNM1,PTPRC,CDKN1A,STX1A,ACTA1,JUN,PRKDC,LTB,TUBB3	139	366	13123	2.57951	1	0.457762	22.0965
GO:0045941~positive regulation of transcription	13	7.06522	0.0155728	EGR1,TRIM28,TTF1,PRKDC,ILF3,DDIT3,FOS,MAPK1,JUN,FOXC1,SUPT5H,KLF2,HNRNPAB	139	563	13123	2.17998	1	0.455472	22.5648
GO:0043068~positive regulation of programmed cell death	11	5.97826	0.0155886	MAPK1,PTPRC,CDKN1A,AIFM1,CDKN2C,JUN,PRKDC,HSPD1,LTB,DEDD2,DDIT3	139	431	13123	2.40954	1	0.445984	22.5851
GO:0010942~positive regulation of cell death	11	5.97826	0.0160509	MAPK1,PTPRC,CDKN1A,AIFM1,CDKN2C,JUN,PRKDC,HSPD1,LTB,DEDD2,DDIT3	139	433	13123	2.39841	1	0.44614	23.1754
GO:0001558~regulation of cell growth	7	3.80435	0.0166403	CDKN1A,SOCS2,ULK1,CDKN2C,HBEGF,GNG4,CYR61	139	194	13123	3.40655	1	0.448823	23.9217
GO:0002757~immune response-activating signal transduction	4	2.17391	0.0172803	MAPK1,PTPRC,SPG21,HSPD1	139	52	13123	7.26231	1	0.452333	24.7245
GO:0031667~response to nutrient levels	7	3.80435	0.0178117	STC2,JUN,CTSD,ASNS,ENSA,HSPA5,DDIT3	139	197	13123	3.35467	1	0.453617	25.385
GO:0051173~positive regulation of nitrogen compound metabolic process	14	7.6087	0.0178778	EGR1,PTPRC,TRIM28,TTF1,PRKDC,ILF3,DDIT3,FOS,MAPK1,JUN,FOXC1,KLF2,SUPT5H,HNRNPAB	139	643	13123	2.05558	1	0.446305	25.4667
GO:0051348~negative regulation of transferase activity	5	2.71739	0.0184767	PTPRC,CDKN1A,PAK2,TRIB3,GADD45B	139	96	13123	4.91719	1	0.448907	26.2038
GO:0010628~positive regulation of gene expression	13	7.06522	0.0192096	EGR1,TRIM28,TTF1,PRKDC,ILF3,DDIT3,FOS,MAPK1,JUN,FOXC1,SUPT5H,KLF2,HNRNPAB	139	580	13123	2.11609	1	0.453709	27.0965
GO:0010557~positive regulation of macromolecule biosynthetic process	14	7.6087	0.0198061	EGR1,TRIM28,TTF1,PRKDC,ILF3,DDIT3,FOS,MAPK1,JUN,FOXC1,KLF2,SUPT5H,LTB,HNRNPAB	139	652	13123	2.02721	1	0.455953	27.8156
GO:0007242~intracellular signaling cascade	22	11.9565	0.0201036	PTPRC,SOCS2,AIFM1,MKNK2,ASB13,SHANK3,MAPK1,ARL5A,ICK,ULK1,DEF8,RAB23,GADD45B,GNG4,RAPGEFL1,LTB,RASD1,MT1H,PIK3R1,TUBB3,DEDD2,HIST1H4H	139	1245	13123	1.66829	1	0.453152	28.1717
GO:0002764~immune response-regulating signal transduction	4	2.17391	0.0210292	MAPK1,PTPRC,SPG21,HSPD1	139	56	13123	6.74358	1	0.460611	29.2693
GO:0009612~response to mechanical stimulus	4	2.17391	0.0210292	FOS,ACTA1,JUN,LTB	139	56	13123	6.74358	1	0.460611	29.2693
GO:0006916~anti-apoptosis	7	3.80435	0.0212102	SON,YWHAZ,SOCS2,BAG3,FOXC1,HSPA1A,HSPA5,HSPA1B	139	205	13123	3.22376	1	0.456023	29.482
GO:0006468~protein amino acid phosphorylation	14	7.6087	0.0218877	PTPRC,TRIM28,MKNK2,PKMYT1,TRIB3,PRKDC,CLK1,TRIB2,MAPK1,ICK,PAK2,ULK1,DYRK1A,GADD45B	139	661	13123	1.99961	1	0.459279	30.2732
GO:0006915~apoptosis	13	7.06522	0.0223958	AIFM1,LGALS1,TRIB3,TMEM173,PAK2,BAG3,JUN,ZC3H12A,HSPD1,GADD45B,PPP1R15A,LTB,DEDD2	139	593	13123	2.0697	1	0.459844	30.861
GO:0032535~regulation of cellular component size	8	4.34783	0.0239758	CDKN1A,ACTA1,ULK1,CDKN2C,HBEGF,CYFIP1,EMP3,GNG4	139	270	13123	2.79734	1	0.475932	32.6593
GO:0017156~calcium ion-dependent exocytosis	3	1.63043	0.0240419	STX1A,TRIM36,RIMS3	139	23	13123	12.3144	1	0.469912	32.7336
GO:0016049~cell growth	4	2.17391	0.0262931	ACTA1,ULK1,CYFIP1,EMP3	139	61	13123	6.19082	1	0.493911	35.2175
GO:0009636~response to toxin	4	2.17391	0.0262931	FOS,CDKN1A,MT1H,SLC7A11	139	61	13123	6.19082	1	0.493911	35.2175
GO:0016051~carbohydrate biosynthetic process	5	2.71739	0.0262989	ATF3,MAT2B,PCK2,NANP,ACN9	139	107	13123	4.41169	1	0.487185	35.2238
GO:0002520~immune system development	8	4.34783	0.0266163	EGR1,PTPRC,ID2,CRIP2,PRKDC,HSPD1,LTB,PIK3R1	139	276	13123	2.73652	1	0.484702	35.567
GO:0031328~positive regulation of cellular biosynthetic process	14	7.6087	0.0279514	EGR1,TRIM28,TTF1,PRKDC,ILF3,DDIT3,FOS,MAPK1,JUN,FOXC1,KLF2,SUPT5H,LTB,HNRNPAB	139	684	13123	1.93237	1	0.495201	36.9919
GO:0006094~gluconeogenesis	3	1.63043	0.0281225	ATF3,PCK2,ACN9	139	25	13123	11.3292	1	0.490897	37.1725
GO:0010243~response to organic nitrogen	4	2.17391	0.0285781	CDKN1A,HMGCS1,ASNS,DDIT3	139	63	13123	5.99429	1	0.490194	37.6506
GO:0045859~regulation of protein kinase activity	9	4.8913	0.0293062	PTPRC,CDKN1A,PAK2,CDKN2C,PKMYT1,TRIB3,GADD45B,TRIB2,CDC25B	139	345	13123	2.46287	1	0.492777	38.4077
GO:0009891~positive regulation of biosynthetic process	14	7.6087	0.0306332	EGR1,TRIM28,TTF1,PRKDC,ILF3,DDIT3,FOS,MAPK1,JUN,FOXC1,KLF2,SUPT5H,LTB,HNRNPAB	139	693	13123	1.90727	1	0.502205	39.7653
GO:0033554~cellular response to stress	12	6.52174	0.0340314	MAPK1,FOS,CDKN1A,AIFM1,JUN,PRKDC,CTSD,ASNS,HSPA5,PPP1R15A,DDIT3,SETX	139	560	13123	2.02307	1	0.533697	43.1151
GO:0016310~phosphorylation	15	8.15217	0.0346381	PTPRC,TRIM28,MKNK2,PKMYT1,TRIB3,PRKDC,CLK1,TRIB2,MAPK1,ICK,PAK2,ULK1,DYRK1A,GADD45B,PIK3R1	139	779	13123	1.81791	1	0.534014	43.6945
GO:0030199~collagen fibril organization	3	1.63043	0.0347193	FOXC1,SERPINH1,ANXA2	139	28	13123	10.1154	1	0.52889	43.7716
GO:0043549~regulation of kinase activity	9	4.8913	0.0348457	PTPRC,CDKN1A,PAK2,CDKN2C,PKMYT1,TRIB3,GADD45B,TRIB2,CDC25B	139	357	13123	2.38009	1	0.524348	43.8914
GO:0002377~immunoglobulin production	3	1.63043	0.0394166	PTPRC,PRKDC,HSPD1	139	30	13123	9.44101	1	0.563487	48.0676
GO:0042149~cellular response to glucose starvation	2	1.08696	0.0414093	ASNS,HSPA5	139	4	13123	47.205	1	0.575951	49.7955
GO:0002440~production of molecular mediator of immune response	3	1.63043	0.0418506	PTPRC,PRKDC,HSPD1	139	31	13123	9.13646	1	0.574161	50.1706
GO:0019319~hexose biosynthetic process	3	1.63043	0.0418506	ATF3,PCK2,ACN9	139	31	13123	9.13646	1	0.574161	50.1706
GO:0051338~regulation of transferase activity	9	4.8913	0.0427208	PTPRC,CDKN1A,PAK2,CDKN2C,PKMYT1,TRIB3,GADD45B,TRIB2,CDC25B	139	372	13123	2.28411	1	0.576172	50.903
GO:0010605~negative regulation of macromolecule metabolic process	14	7.6087	0.0436535	EGR1,PTPRC,TRIM28,TTF1,ILF3,FOSB,ID2,JUN,RAB23,HBEGF,SUPT5H,RASD1,DEDD2,HNRNPAB	139	730	13123	1.8106	1	0.578652	51.6766
GO:0042113~B cell activation	4	2.17391	0.0458949	PTPRC,PRKDC,HSPD1,PIK3R1	139	76	13123	4.96895	1	0.591864	53.4892
GO:0050851~antigen receptor-mediated signaling pathway	3	1.63043	0.0468822	MAPK1,PTPRC,SPG21	139	33	13123	8.58273	1	0.594418	54.2672
GO:0034976~response to endoplasmic reticulum stress	3	1.63043	0.049477	HSPA5,PPP1R15A,DDIT3	139	34	13123	8.3303	1	0.609313	56.2541
GO:0031953~negative regulation of protein amino acid autophosphorylation	2	1.08696	0.0514929	PTPRC,JUN	139	5	13123	37.764	1	0.619086	57.7415
GO:0032870~cellular response to hormone stimulus	5	2.71739	0.0516993	FOS,SOCS2,PRKDC,GNG4,PIK3R1	139	133	13123	3.54925	1	0.615382	57.8911
GO:0006984~ER-nuclear signaling pathway	3	1.63043	0.0521227	HSPA5,PPP1R15A,DDIT3	139	35	13123	8.09229	1	0.613321	58.1964
GO:0042325~regulation of phosphorylation	10	5.43478	0.0549175	PTPRC,CDKN1A,PAK2,CDKN2C,JUN,PKMYT1,TRIB3,GADD45B,TRIB2,CDC25B	139	462	13123	2.04351	1	0.627992	60.16
GO:0048534~hemopoietic or lymphoid organ development	7	3.80435	0.0566589	EGR1,PTPRC,ID2,CRIP2,PRKDC,LTB,PIK3R1	139	260	13123	2.54181	1	0.634807	61.3394
GO:0009314~response to radiation	6	3.26087	0.0589735	FOS,PITPNM1,PTPRC,CDKN1A,PRKDC,TUBB3	139	199	13123	2.84653	1	0.645043	62.8563
GO:0010558~negative regulation of macromolecule biosynthetic process	11	5.97826	0.0603333	EGR1,ID2,TRIM28,HBEGF,TTF1,ILF3,FOSB,SUPT5H,RASD1,DEDD2,HNRNPAB	139	543	13123	1.91254	1	0.648817	63.7212
GO:0060395~SMAD protein signal transduction	2	1.08696	0.061471	FOS,JUN	139	6	13123	31.47	1	0.651098	64.4303
GO:0009629~response to gravity	2	1.08696	0.061471	FOS,STX1A	139	6	13123	31.47	1	0.651098	64.4303
GO:0044092~negative regulation of molecular function	8	4.34783	0.0619407	PTPRC,CDKN1A,ID2,PAK2,TRIB3,HSPA5,GADD45B,DDIT3	139	333	13123	2.26811	1	0.649245	64.7192
GO:0010035~response to inorganic substance	6	3.26087	0.0620759	FOS,CDKN1A,JUN,MT1H,DDIT3,MT1X	139	202	13123	2.80426	1	0.64539	64.8019
GO:0002429~immune response-activating cell surface receptor signaling pathway	3	1.63043	0.0631875	MAPK1,PTPRC,SPG21	139	39	13123	7.26231	1	0.647506	65.4755
GO:0045893~positive regulation of transcription, DNA-dependent	10	5.43478	0.063823	EGR1,FOS,JUN,TRIM28,PRKDC,TTF1,FOXC1,ILF3,SUPT5H,HNRNPAB	139	476	13123	1.9834	1	0.646742	65.8551
GO:0010604~positive regulation of macromolecule metabolic process	15	8.15217	0.0651462	EGR1,PTPRC,TRIM28,TTF1,PRKDC,ILF3,DDIT3,FOS,MAPK1,JUN,FOXC1,KLF2,SUPT5H,LTB,HNRNPAB	139	854	13123	1.65826	1	0.650031	66.633
GO:0019220~regulation of phosphate metabolic process	10	5.43478	0.0665275	PTPRC,CDKN1A,PAK2,CDKN2C,JUN,PKMYT1,TRIB3,GADD45B,TRIB2,CDC25B	139	480	13123	1.96688	1	0.653554	67.4273
GO:0051174~regulation of phosphorus metabolic process	10	5.43478	0.0665275	PTPRC,CDKN1A,PAK2,CDKN2C,JUN,PKMYT1,TRIB3,GADD45B,TRIB2,CDC25B	139	480	13123	1.96688	1	0.653554	67.4273
GO:0051254~positive regulation of RNA metabolic process	10	5.43478	0.0665275	EGR1,FOS,JUN,TRIM28,PRKDC,TTF1,FOXC1,ILF3,SUPT5H,HNRNPAB	139	480	13123	1.96688	1	0.653554	67.4273
GO:0006090~pyruvate metabolic process	3	1.63043	0.0689913	ATF3,PCK2,ACN9	139	41	13123	6.90805	1	0.662982	68.8001
GO:0031327~negative regulation of cellular biosynthetic process	11	5.97826	0.0690615	EGR1,ID2,TRIM28,HBEGF,TTF1,ILF3,FOSB,SUPT5H,RASD1,DEDD2,HNRNPAB	139	557	13123	1.86447	1	0.659029	68.8385
GO:0008284~positive regulation of cell proliferation	9	4.8913	0.0699881	MAPK1,PTPRC,CDKN1A,ATF3,ID2,CRIP2,JUN,HBEGF,CDC25B	139	413	13123	2.05736	1	0.659808	69.34
GO:0031952~regulation of protein amino acid autophosphorylation	2	1.08696	0.071345	PTPRC,JUN	139	7	13123	26.9743	1	0.662874	70.0608
GO:0006882~cellular zinc ion homeostasis	2	1.08696	0.071345	SLC30A1,MT1H	139	7	13123	26.9743	1	0.662874	70.0608
GO:0002768~immune response-regulating cell surface receptor signaling pathway	3	1.63043	0.0719566	MAPK1,PTPRC,SPG21	139	42	13123	6.74358	1	0.661933	70.3805
GO:0030308~negative regulation of cell growth	4	2.17391	0.0727898	CDKN1A,ULK1,CDKN2C,GNG4	139	92	13123	4.10479	1	0.662173	70.8107
GO:0002253~activation of immune response	4	2.17391	0.0727898	MAPK1,PTPRC,SPG21,HSPD1	139	92	13123	4.10479	1	0.662173	70.8107
GO:0006796~phosphate metabolic process	16	8.69565	0.0740997	PTPRC,TRIM28,MKNK2,PRKDC,PKMYT1,TRIB3,CLK1,TRIB2,CDC25B,MAPK1,ICK,PAK2,ULK1,DYRK1A,GADD45B,PIK3R1	139	950	13123	1.59006	1	0.664871	71.4754
GO:0006793~phosphorus metabolic process	16	8.69565	0.0740997	PTPRC,TRIM28,MKNK2,PRKDC,PKMYT1,TRIB3,CLK1,TRIB2,CDC25B,MAPK1,ICK,PAK2,ULK1,DYRK1A,GADD45B,PIK3R1	139	950	13123	1.59006	1	0.664871	71.4754
GO:0009890~negative regulation of biosynthetic process	11	5.97826	0.0771565	EGR1,ID2,TRIM28,HBEGF,TTF1,ILF3,FOSB,SUPT5H,RASD1,DEDD2,HNRNPAB	139	569	13123	1.82515	1	0.676213	72.9717
GO:0045892~negative regulation of transcription, DNA-dependent	8	4.34783	0.0790357	EGR1,ID2,TRIM28,ILF3,FOSB,SUPT5H,RASD1,HNRNPAB	139	353	13123	2.13961	1	0.681371	73.8546
GO:0001775~cell activation	7	3.80435	0.0792955	EGR1,PTPRC,YWHAZ,PRKDC,HSPD1,LTB,PIK3R1	139	284	13123	2.32701	1	0.678676	73.9745
GO:0055069~zinc ion homeostasis	2	1.08696	0.0811159	SLC30A1,MT1H	139	8	13123	23.6025	1	0.683406	74.8004
GO:0060396~growth hormone receptor signaling pathway	2	1.08696	0.0811159	SOCS2,PIK3R1	139	8	13123	23.6025	1	0.683406	74.8004
GO:0048675~axon extension	2	1.08696	0.0811159	ULK1,CYFIP1	139	8	13123	23.6025	1	0.683406	74.8004
GO:0051253~negative regulation of RNA metabolic process	8	4.34783	0.0846534	EGR1,ID2,TRIM28,ILF3,FOSB,SUPT5H,RASD1,HNRNPAB	139	359	13123	2.10385	1	0.695754	76.3353
GO:0045792~negative regulation of cell size	4	2.17391	0.0863335	CDKN1A,ULK1,CDKN2C,GNG4	139	99	13123	3.81455	1	0.699402	77.0332
GO:0045934~negative regulation of nucleobase, nucleoside, nucleotide and nucleic acid metabolic process	10	5.43478	0.088296	EGR1,ID2,TRIM28,TTF1,ILF3,FOSB,SUPT5H,RASD1,DEDD2,HNRNPAB	139	509	13123	1.85481	1	0.704155	77.8239
GO:0048610~reproductive cellular process	5	2.71739	0.0899139	TRIM36,PRKDC,FOXC1,PPP2R2B,CDC25B	139	161	13123	2.93199	1	0.707314	78.4565
GO:0060416~response to growth hormone stimulus	2	1.08696	0.0907847	SOCS2,PIK3R1	139	9	13123	20.98	1	0.707298	78.7899
GO:0050853~B cell receptor signaling pathway	2	1.08696	0.0907847	MAPK1,PTPRC	139	9	13123	20.98	1	0.707298	78.7899
GO:0009725~response to hormone stimulus	8	4.34783	0.0914913	MAPK1,FOS,CDKN1A,SOCS2,ACTA1,PRKDC,GNG4,PIK3R1	139	366	13123	2.06361	1	0.70661	79.0569
GO:0007243~protein kinase cascade	8	4.34783	0.092493	MAPK1,PTPRC,ICK,SOCS2,MKNK2,GADD45B,SHANK3,PIK3R1	139	367	13123	2.05799	1	0.707143	79.43
GO:0051172~negative regulation of nitrogen compound metabolic process	10	5.43478	0.0941222	EGR1,ID2,TRIM28,TTF1,ILF3,FOSB,SUPT5H,RASD1,DEDD2,HNRNPAB	139	516	13123	1.82965	1	0.710194	80.0235
GO:0030098~lymphocyte differentiation	4	2.17391	0.0945185	EGR1,PTPRC,PRKDC,PIK3R1	139	103	13123	3.66641	1	0.708276	80.1654
GO:0030198~extracellular matrix organization	4	2.17391	0.0945185	FOXC1,SERPINH1,CYR61,ANXA2	139	103	13123	3.66641	1	0.708276	80.1654
GO:0007050~cell cycle arrest	4	2.17391	0.0945185	CDKN1A,CDKN2C,PPP1R15A,DDIT3	139	103	13123	3.66641	1	0.708276	80.1654

## Sheet: 6h_MF_Jurkat
Table S6. GO term enrichment
Term	Count	%	PValue	Genes	List Total	Pop Hits	Pop Total	Fold Enrichment	Bonferroni	Benjamini	FDR
GO:0004812~aminoacyl-tRNA ligase activity	12	1.52478	3.2273e-06	IARS,TARS,YARS,CARS,SARS,AARS,GARS,MARS2,YARS2,LRRC47,MARS,EARS2	550	46	12602	5.97723	0.00246584	0.00246584	0.00492468
GO:0016875~ligase activity, forming carbon-oxygen bonds	12	1.52478	3.2273e-06	IARS,TARS,YARS,CARS,SARS,AARS,GARS,MARS2,YARS2,LRRC47,MARS,EARS2	550	46	12602	5.97723	0.00246584	0.00246584	0.00492468
GO:0016876~ligase activity, forming aminoacyl-tRNA and related compounds	12	1.52478	3.2273e-06	IARS,TARS,YARS,CARS,SARS,AARS,GARS,MARS2,YARS2,LRRC47,MARS,EARS2	550	46	12602	5.97723	0.00246584	0.00246584	0.00492468
GO:0046870~cadmium ion binding	6	0.762389	3.23634e-05	MT1A,MT1E,MT1JP,MT1H,MT1G,MT1X,MT1F	550	10	12602	13.7476	0.0244544	0.0123029	0.0493745
GO:0003723~RNA binding	53	6.73443	0.000119077	ZC3HAV1,SURF6,CPEB3,SYNCRIP,MKI67IP,NONO,RBM4B,IMP3,DDX12,WIBG,RBM12,NOL6,ZFP36,YARS,CARS,RPUSD2,EXOSC4,SARS,AARS,RPUSD1,MBNL2,MRPS6,MBNL1,SFRS1,DIS3L,EARS2,SFRS2,HNRPDL,EIF4A3,ABT1,SLU7,DDX31,CNBP,PUS1,PUS7,DDX47,DDX46,METTL3,METTL1,TNRC6B,NSUN2,HNRNPAB,MARS,NKRF,PNO1,PPP1R10,ILF3,LRRC47,RPL28,FXR1,DDX55,PPRC1,RBM17	550	703	12602	1.72742	0.087073	0.02991	0.181555
GO:0003677~DNA binding	131	16.6455	0.000246533	HIST2H2AA3,SURF6,LMO4,BBX,RORA,FOXO3,HMGN4,NONO,ZNF182,ZNF187,HIST1H2BK,DDX12,H2AFX,ZNF394,TIGD5,ZNF576,TBPL1,DFFB,RELB,SIX6,DDIT3,MSX1,MTF1,TRIM33,TCFL5,ABT1,ZNF197,JUN,NFE2L3,EP400,ZNF436,CNBP,ZFAND3,TSHZ1,SOX4,MYT1,ZNF616,HOXA6,JUND,NKX3-1,POLQ,RUNX1,THAP11,RUNX3,HNRNPAB,NKRF,MAFG,KLF6,MAFF,SMAD6,TAF7,RYBP,ZNF627,ZBTB43,DNASE2,POLRMT,NOTCH1,ATF3,ETS2,HSPD1,DNAJB6,ZNF410,SNORA25,ZBTB34,E2F5,GPB…	550	2248	12602	1.33522	0.1719	0.0460607	0.375544
GO:0051087~chaperone binding	7	0.889454	0.000355837	GRPEL2,GRPEL1,HSPE1,HSPD1,AHSA2,AHSA1,DNAJB6	550	23	12602	6.97344	0.238347	0.0529968	0.541626
GO:0060590~ATPase regulator activity	5	0.635324	0.000376785	GRPEL2,GRPEL1,AHSA2,AHSA1,DNAJB6	550	9	12602	12.7293	0.250459	0.046913	0.573424
GO:0051082~unfolded protein binding	14	1.77891	0.00105945	HSP90AB1,PTGES3,GRPEL2,GRPEL1,HSP90AA1,HSPA1A,HSPA1B,SERPINH1,DNAJB9,DNAJA1,DNAJB2,HSPE1,HSPD1,DNAJB1,HSPA9	550	111	12602	2.88989	0.555546	0.109386	1.60455
GO:0000049~tRNA binding	6	0.762389	0.00138524	YARS,CARS,METTL1,AARS,NSUN2,MARS	550	20	12602	6.87382	0.653696	0.124145	2.09309
GO:0015175~neutral amino acid transmembrane transporter activity	6	0.762389	0.00175373	SLC1A4,SLC1A5,SLC6A9,SLC3A2,SLC7A5,SLC7A11	550	21	12602	6.54649	0.738882	0.138601	2.64295
GO:0070035~purine NTP-dependent helicase activity	12	1.52478	0.00324355	EIF4A3,DDX47,C9ORF102,DDX46,DDX55,DDX23,DDX12,CHD2,DDX31,CHD1,DHX33,POLQ	550	97	12602	2.83456	0.916703	0.220057	4.83675
GO:0008026~ATP-dependent helicase activity	12	1.52478	0.00324355	EIF4A3,DDX47,C9ORF102,DDX46,DDX55,DDX23,DDX12,CHD2,DDX31,CHD1,DHX33,POLQ	550	97	12602	2.83456	0.916703	0.220057	4.83675
GO:0030528~transcription regulator activity	87	11.0546	0.00324825	E2F5,LMO4,PAX6,CBX4,RORA,FOXO3,BUD31,ZKSCAN4,FOS,ZNF187,TFB2M,POU4F1,ZNF394,SUPT5H,MYB,MYC,SERTAD1,TBPL1,EGR1,PCBD1,SOX11,RELB,FOSB,NPAS4,MXD1,SIX6,DDIT3,MYCN,MXD4,SFRS2,MSX1,MTF1,TCFL5,ABT1,BTG1,ZNF197,JUN,UBC,CAND2,UBB,NFE2L3,IRX3,CNBP,IRX5,TSHZ1,SCML1,SOX4,TRIB3,FHL2,MYT1,GRAMD4,C5ORF41,TSC22D3,XBP1,HOXA6,JUND,NKX3-1,BCL6,HBP1,POU3F2,GTF3C2,RUNX1,ETV5,RUNX3,GTF3C3,HNRNPAB,NKRF,MAFG,KLF6,MAFF,C…	550	1484	12602	1.34327	0.917004	0.202496	4.84361
GO:0015171~amino acid transmembrane transporter activity	9	1.14358	0.00385447	SLC25A12,SLC1A4,SLC1A5,SLC6A9,SLC38A2,SLC7A1,SLC3A2,SLC7A5,SLC7A11	550	59	12602	3.49516	0.947888	0.218232	5.72292
GO:0000166~nucleotide binding	120	15.2478	0.00654511	GRPEL2,GRPEL1,DYNC1LI2,FASTKD2,EIF5,SYNCRIP,PKMYT1,CLK1,PI4K2B,NONO,ACTG2,DDX23,CLK3,MC1R,DDX12,ABCB10,DHX33,SPR,RBM12,GNL3,GTPBP4,CARS,YARS,PNCK,AARS,TBRG4,SFRS1,SFRS2,EARS2,MAPK1,NME3,ATP2C1,SCYL2,DDX31,YARS2,EP400,GPN1,ADSS,FGFR3,DHFRL1,STK17B,UBA7,HSPA1A,HSPA1B,DDX47,DDX46,VRK3,RAC2,GFM1,HSPE1,POLQ,RUNX1,RUNX3,RHEBL1,HNRNPAB,GARS,AK2,HYOU1,DDX55,ULK1,PPRC1,HSPD1,THNSL1,CLCN6,HSP90AB1,CPEB3,UB…	550	2213	12602	1.24244	0.993418	0.320515	9.53484
GO:0046983~protein dimerization activity	37	4.7014	0.00666556	GRPEL2,GRPEL1,MCL1,ASNS,TPD52,GCLM,PDSS1,FOS,TRIM8,PLOD1,XBP1,PPP2CB,JUND,CD2,RUNX1,SUPT5H,BMP4,CARS,HSP90AA1,CEBPB,PTPRE,CD3G,CEBPG,SMAD6,CENPF,POLR1C,FOSB,TPD52L2,NPAS4,DDIT3,TARS,ATF3,DBP,JUN,VEGFA,NFE2L3,CBS	550	537	12602	1.57872	0.994001	0.306112	9.70207
GO:0005507~copper ion binding	9	1.14358	0.00699231	MT1A,MT1E,SLC31A2,PRNP,MT1JP,MT1H,MT1G,MT1X,SCO2,MT1F	550	65	12602	3.17253	0.995336	0.300829	10.1543
GO:0070412~R-SMAD binding	4	0.508259	0.00784388	FOS,TRIM33,JUN,SMAD6	550	10	12602	9.16509	0.997581	0.31375	11.3228
GO:0005524~ATP binding	83	10.5464	0.00889727	HSP90AB1,DYNC1LI2,FASTKD2,UBE2G2,PKMYT1,CLK1,PI4K2B,HSPH1,ACTG2,CLK3,DDX23,DDX12,ACTR5,ABCB10,DHX33,MASTL,NSF,ABCE1,CARS,YARS,HSP90AA1,ACTA1,SARS,PNCK,AARS,TBRG4,UBE2H,PFKM,TIMM44,EARS2,MAST3,MAPK1,TARS,EIF4A3,NME3,ATP2C1,SCYL2,DDX31,YARS2,RAGE,EP400,GPN1,FGFR3,FKBP4,STK17B,MKNK2,UBA7,TRIB3,HSPA1A,ASNS,HSPA1B,PFAS,IARS,DDX47,DDX46,VRK3,SNRK,STK40,CHD2,HSPA6,MARS2,CHD1,ETNK1,HSPA4,HSPE1,RUNX1,POLQ…	550	1462	12602	1.30079	0.998927	0.331132	12.7487
GO:0032553~ribonucleotide binding	100	12.7065	0.00900123	DYNC1LI2,FASTKD2,EIF5,PKMYT1,PI4K2B,CLK1,ACTG2,CLK3,MC1R,DDX23,DDX12,DHX33,ABCB10,GNL3,CARS,GTPBP4,YARS,PNCK,AARS,TBRG4,EARS2,MAPK1,NME3,ATP2C1,SCYL2,DDX31,YARS2,EP400,GPN1,ADSS,FGFR3,UBA7,STK17B,HSPA1A,HSPA1B,DDX47,DDX46,VRK3,RAC2,GFM1,HSPE1,POLQ,RUNX1,RUNX3,RHEBL1,GARS,AK2,HYOU1,DDX55,ULK1,HSPD1,THNSL1,CLCN6,HSP90AB1,UBE2G2,HSPH1,ACTR5,MASTL,ARL5B,NSF,TUBB3,ABCE1,HSP90AA1,ACTA1,SARS,UBE2H,PFKM,…	550	1813	12602	1.2638	0.999009	0.319062	12.8883
GO:0032555~purine ribonucleotide binding	100	12.7065	0.00900123	DYNC1LI2,FASTKD2,EIF5,PKMYT1,PI4K2B,CLK1,ACTG2,CLK3,MC1R,DDX23,DDX12,DHX33,ABCB10,GNL3,CARS,GTPBP4,YARS,PNCK,AARS,TBRG4,EARS2,MAPK1,NME3,ATP2C1,SCYL2,DDX31,YARS2,EP400,GPN1,ADSS,FGFR3,UBA7,STK17B,HSPA1A,HSPA1B,DDX47,DDX46,VRK3,RAC2,GFM1,HSPE1,POLQ,RUNX1,RUNX3,RHEBL1,GARS,AK2,HYOU1,DDX55,ULK1,HSPD1,THNSL1,CLCN6,HSP90AB1,UBE2G2,HSPH1,ACTR5,MASTL,ARL5B,NSF,TUBB3,ABCE1,HSP90AA1,ACTA1,SARS,UBE2H,PFKM,…	550	1813	12602	1.2638	0.999009	0.319062	12.8883
GO:0008138~protein tyrosine/serine/threonine phosphatase activity	7	0.889454	0.00918287	DUSP5,DUSP1,SSH3,DUSP10,CDKN3,DUSP8,PTPDC1	550	42	12602	3.81879	0.999139	0.310259	13.1316
GO:0003700~transcription factor activity	58	7.36976	0.00982629	E2F5,LMO4,PAX6,RORA,FOXO3,BUD31,ZKSCAN4,FOS,ZNF187,POU4F1,ZNF394,MYC,EGR1,SOX11,RELB,FOSB,MXD1,SIX6,DDIT3,MYCN,MSX1,TCFL5,MTF1,ZNF197,JUN,NFE2L3,IRX3,CNBP,IRX5,TSHZ1,SCML1,SOX4,MYT1,GRAMD4,C5ORF41,TSC22D3,XBP1,HOXA6,JUND,NKX3-1,POU3F2,BCL6,RUNX1,ETV5,RUNX3,HNRNPAB,MAFG,MAFF,KLF6,CEBPB,CEBPG,SMAD6,TAF7,ZNF24,STAT2,NOTCH1,ATF3,DBP,ETS2	550	959	12602	1.38575	0.999476	0.314574	13.9885
GO:0017076~purine nucleotide binding	103	13.0877	0.0116723	GRPEL2,GRPEL1,DYNC1LI2,FASTKD2,EIF5,PKMYT1,PI4K2B,CLK1,ACTG2,CLK3,MC1R,DDX23,DDX12,DHX33,ABCB10,GNL3,CARS,GTPBP4,YARS,PNCK,AARS,TBRG4,EARS2,MAPK1,NME3,ATP2C1,SCYL2,DDX31,YARS2,EP400,GPN1,ADSS,FGFR3,UBA7,STK17B,HSPA1A,HSPA1B,DDX47,DDX46,VRK3,RAC2,GFM1,HSPE1,POLQ,RUNX1,RUNX3,RHEBL1,GARS,AK2,HYOU1,DDX55,ULK1,HSPD1,THNSL1,CLCN6,HSP90AB1,UBE2G2,HSPH1,ACTR5,CHST12,MASTL,ARL5B,NSF,TUBB3,ABCE1,HSP90AA1,A…	550	1894	12602	1.24605	0.999874	0.347997	16.4032
GO:0032559~adenyl ribonucleotide binding	83	10.5464	0.0130037	HSP90AB1,DYNC1LI2,FASTKD2,UBE2G2,PKMYT1,CLK1,PI4K2B,HSPH1,ACTG2,CLK3,DDX23,DDX12,ACTR5,ABCB10,DHX33,MASTL,NSF,ABCE1,CARS,YARS,HSP90AA1,ACTA1,SARS,PNCK,AARS,TBRG4,UBE2H,PFKM,TIMM44,EARS2,MAST3,MAPK1,TARS,EIF4A3,NME3,ATP2C1,SCYL2,DDX31,YARS2,RAGE,EP400,GPN1,FGFR3,FKBP4,STK17B,MKNK2,UBA7,TRIB3,HSPA1A,ASNS,HSPA1B,PFAS,IARS,DDX47,DDX46,VRK3,SNRK,STK40,CHD2,HSPA6,MARS2,CHD1,ETNK1,HSPA4,HSPE1,RUNX1,POLQ…	550	1482	12602	1.28324	0.999955	0.36564	18.1052
GO:0009982~pseudouridine synthase activity	4	0.508259	0.013476	PUS1,RPUSD2,RPUSD1,PUS7	550	12	12602	7.63758	0.999969	0.363181	18.7012
GO:0008173~RNA methyltransferase activity	5	0.635324	0.0139448	C1ORF66,METTL3,METTL1,TFB2M,NSUN2	550	22	12602	5.20744	0.999978	0.360851	19.2887
GO:0005275~amine transmembrane transporter activity	9	1.14358	0.0148814	SLC25A12,SLC1A4,SLC1A5,SLC6A9,SLC38A2,SLC7A1,SLC3A2,SLC7A5,SLC7A11	550	74	12602	2.78668	0.99999	0.367954	20.4508
GO:0046914~transition metal ion binding	139	17.662	0.0157248	B3GALT6,ZC3HAV1,LMO4,MYLIP,RORA,MOBKL2A,ZNF182,BRPF3,ZNF187,PLOD1,PLOD3,RNF38,ZNF394,ASPH,ANKZF1,ZNF576,FTL,CARS,UBR4,CYP26A1,UBR2,TRIM38,MTF1,TRIM33,ZNF197,ATP2C1,SLU7,CHORDC1,ANKFY1,SLC40A1,ZNF436,FBXO11,TRAF2,CNBP,ZFAND3,ELAC2,TSHZ1,MYT1,FTH1,ZNF616,TRIM68,RNF165,SLC30A1,DNAJA1,SLC30A2,SLC31A2,THAP11,FGD3,B4GALT5,KLF6,RYBP,SUV39H1,CSRP1,CSRP2,ZNF627,TAX1BP1,ZBTB43,CDKN1A,CBLB,CYP2R1,ZNF410,ZBT…	550	2685	12602	1.18617	0.999995	0.372712	21.4837
GO:0030554~adenyl nucleotide binding	86	10.9276	0.016437	HSP90AB1,GRPEL2,GRPEL1,DYNC1LI2,FASTKD2,UBE2G2,PKMYT1,CLK1,PI4K2B,HSPH1,ACTG2,CLK3,DDX23,DDX12,ACTR5,CHST12,ABCB10,DHX33,MASTL,NSF,ABCE1,CARS,YARS,HSP90AA1,ACTA1,SARS,PNCK,AARS,TBRG4,UBE2H,PFKM,TIMM44,EARS2,MAST3,MAPK1,TARS,EIF4A3,NME3,ATP2C1,SCYL2,DDX31,YARS2,RAGE,EP400,GPN1,FGFR3,FKBP4,STK17B,MKNK2,UBA7,TRIB3,HSPA1A,ASNS,HSPA1B,PFAS,IARS,DDX47,DDX46,VRK3,SNRK,STK40,HSPA6,CHD2,MARS2,CHD1,ETNK1,H…	550	1561	12602	1.26233	0.999997	0.374738	22.3462
GO:0017017~MAP kinase tyrosine/serine/threonine phosphatase activity	4	0.508259	0.0169609	DUSP5,DUSP1,DUSP10,DUSP8	550	13	12602	7.05007	0.999998	0.373352	22.975
GO:0033549~MAP kinase phosphatase activity	4	0.508259	0.0169609	DUSP5,DUSP1,DUSP10,DUSP8	550	13	12602	7.05007	0.999998	0.373352	22.975
GO:0004386~helicase activity	13	1.65184	0.0173386	C9ORF102,EIF4A3,DDX47,DDX46,DDX55,DDX23,DDX12,CHD2,DHX33,CHD1,DDX31,POLQ,EP400	550	138	12602	2.15845	0.999998	0.369595	23.4254
GO:0001671~ATPase activator activity	3	0.381194	0.0173535	AHSA2,AHSA1,DNAJB6	550	5	12602	13.7476	0.999998	0.360071	23.4431
GO:0042802~identical protein binding	40	5.08259	0.0193359	GRPEL2,GRPEL1,FGFR3,FHL2,ASNS,TPD52,CLDN12,NONO,NDE1,TRIM8,PLOD1,CD2,POU3F2,ZNF408,RUNX1,THAP11,PHC2,FTL,BMP4,CARS,HSP90AA1,CEBPB,PTPRE,PCBD1,SMAD6,CENPF,TPD52L2,PFKM,ITGA4,CBY1,TAX1BP1,TARS,DOK2,ATF3,FYN,VEGFA,HSPB1,COL1A1,PRNP,CBS	550	636	12602	1.44105	1	0.38235	25.7663
GO:0001882~nucleoside binding	87	11.0546	0.0200304	HSP90AB1,GRPEL2,GRPEL1,DYNC1LI2,FASTKD2,UBE2G2,PKMYT1,CLK1,PI4K2B,HSPH1,ACTG2,CLK3,DDX23,DDX12,ACTR5,CHST12,ABCB10,DHX33,MASTL,NSF,ABCE1,CARS,YARS,HSP90AA1,ACTA1,SARS,PNCK,AARS,TBRG4,POLR1B,UBE2H,PFKM,TIMM44,EARS2,MAST3,MAPK1,TARS,EIF4A3,NME3,ATP2C1,SCYL2,DDX31,YARS2,RAGE,EP400,GPN1,FGFR3,FKBP4,STK17B,MKNK2,UBA7,TRIB3,HSPA1A,ASNS,HSPA1B,PFAS,IARS,DDX47,DDX46,VRK3,SNRK,STK40,HSPA6,CHD2,MARS2,CHD1,…	550	1596	12602	1.249	1	0.383509	26.5645
GO:0016866~intramolecular transferase activity	5	0.635324	0.0217651	PUS1,RPUSD2,RPUSD1,PMM2,PUS7	550	25	12602	4.58255	1	0.399581	28.5233
GO:0016879~ligase activity, forming carbon-nitrogen bonds	18	2.28717	0.0218028	RNF144B,ADSS,UBE2G2,UBR4,HERC4,ASNS,UBR2,UBE2H,MYLIP,BIRC3,FEM1A,UBE2Q1,GCLM,PFAS,TTLL3,UBL4A,CHFR,FBXO11	550	228	12602	1.8089	1	0.391032	28.5653
GO:0001883~purine nucleoside binding	86	10.9276	0.0228905	HSP90AB1,GRPEL2,GRPEL1,DYNC1LI2,FASTKD2,UBE2G2,PKMYT1,CLK1,PI4K2B,HSPH1,ACTG2,CLK3,DDX23,DDX12,ACTR5,CHST12,ABCB10,DHX33,MASTL,NSF,ABCE1,CARS,YARS,HSP90AA1,ACTA1,SARS,PNCK,AARS,TBRG4,UBE2H,PFKM,TIMM44,EARS2,MAST3,MAPK1,TARS,EIF4A3,NME3,ATP2C1,SCYL2,DDX31,YARS2,RAGE,EP400,GPN1,FGFR3,FKBP4,STK17B,MKNK2,UBA7,TRIB3,HSPA1A,ASNS,HSPA1B,PFAS,IARS,DDX47,DDX46,VRK3,SNRK,STK40,HSPA6,CHD2,MARS2,CHD1,ETNK1,H…	550	1585	12602	1.24321	1	0.397179	29.7679
GO:0003727~single-stranded RNA binding	5	0.635324	0.0282094	ZFP36,HNRPDL,EIF4A3,CNBP,SYNCRIP	550	27	12602	4.2431	1	0.455598	35.3807
GO:0046915~transition metal ion transmembrane transporter activity	5	0.635324	0.0282094	ATP2C1,SLC30A1,SLC30A2,SLC31A2,SLC40A1	550	27	12602	4.2431	1	0.455598	35.3807
GO:0016538~cyclin-dependent protein kinase regulator activity	4	0.508259	0.0301515	CDKN1A,CDKN1B,CDKN2C,CKS2	550	16	12602	5.72818	1	0.469	37.3236
GO:0008270~zinc ion binding	115	14.6125	0.0303239	ZC3HAV1,LMO4,MYLIP,RORA,MOBKL2A,ZNF182,ZNF187,BRPF3,RNF38,ZNF394,ANKZF1,ZNF576,CARS,UBR4,UBR2,TRIM38,MTF1,TRIM33,ZNF197,SLU7,CHORDC1,ANKFY1,FBXO11,ZNF436,TRAF2,CNBP,ZFAND3,ELAC2,TSHZ1,MYT1,ZNF616,TRIM68,SLC30A1,RNF165,DNAJA1,SLC30A2,THAP11,FGD3,KLF6,RYBP,SUV39H1,CSRP1,CSRP2,ZNF627,TAX1BP1,ZBTB43,CBLB,CDKN1A,ZNF410,ZBTB34,LYAR,ZNF295,PHF23,BUD31,ZNF16,ZFYVE21,ZKSCAN4,PHC3,RBM4B,TRIM8,RNF103,ZYX,ZN…	550	2224	12602	1.18479	1	0.46201	37.4934
GO:0043565~sequence-specific DNA binding	37	4.7014	0.0320208	IRX3,TSHZ1,IRX5,PAX6,FOXO3,RORA,C5ORF41,FOS,TSPYL2,XBP1,HOXA6,JUND,NKX3-1,POU3F2,BCL6,POU4F1,MYC,ETV5,HNRNPAB,MAFG,EGR1,MAFF,CEBPB,CEBPG,TAF7,FOSB,SIX6,DDIT3,NOTCH1,MSX1,ATF3,DBP,JUN,ETS2,HSPD1,NFE2L3,TBL1X	550	599	12602	1.41531	1	0.471851	39.142
GO:0004725~protein tyrosine phosphatase activity	10	1.27065	0.0354953	DUSP5,PTPN6,PTPRE,DUSP1,SSH3,PTP4A2,DUSP10,CDKN3,DUSP8,PTPDC1	550	103	12602	2.22454	1	0.49902	42.3914
GO:0008143~poly(A) RNA binding	3	0.381194	0.0445508	HNRPDL,EIF4A3,SYNCRIP	550	8	12602	8.59227	1	0.57273	50.1148
GO:0043566~structure-specific DNA binding	12	1.52478	0.0459125	EGR1,HNRPDL,KLF6,FOS,MSH6,CNBP,NOTCH1,JUN,CEBPG,BCL6,HSPD1,MYC	550	142	12602	1.93629	1	0.575171	51.1887
GO:0016881~acid-amino acid ligase activity	15	1.90597	0.0510671	RNF144B,UBE2G2,UBR4,HERC4,UBR2,UBE2H,MYLIP,BIRC3,UBE2Q1,GCLM,FEM1A,TTLL3,UBL4A,CHFR,FBXO11	550	198	12602	1.73581	1	0.606446	55.0615
GO:0070717~poly-purine tract binding	3	0.381194	0.0556589	HNRPDL,EIF4A3,SYNCRIP	550	9	12602	7.63758	1	0.630527	58.2677
GO:0008134~transcription factor binding	31	3.93901	0.0564269	E2F5,LMO4,CBX4,FHL2,TRIB3,NKX3-1,TFB2M,RUNX1,TBPL1,PCBD1,CEBPG,RELB,TAF7,RYBP,CENPF,DRG1,FOSB,MXD1,DDIT3,MXD4,SFRS2,ATF3,MTF1,ABT1,BTG1,JUN,JMJD1C,TBL1X,NFE2L3,SLC9A1,TOB1	550	509	12602	1.39547	1	0.62745	58.7827
GO:0004861~cyclin-dependent protein kinase inhibitor activity	3	0.381194	0.0676126	CDKN1A,CDKN1B,CDKN2C	550	10	12602	6.87382	1	0.687842	65.6405
GO:0008375~acetylglucosaminyltransferase activity	5	0.635324	0.0699206	XYLT2,B3GNT6,OGT,LFNG,PIGA	550	36	12602	3.18232	1	0.692664	66.9157
GO:0015179~L-amino acid transmembrane transporter activity	5	0.635324	0.081968	SLC25A12,SLC1A4,SLC7A1,SLC7A5,SLC7A11	550	38	12602	3.01483	1	0.744114	72.8845
GO:0030170~pyridoxal phosphate binding	6	0.762389	0.0850811	CTH,SHMT2,THNSL1,PSAT1,GPT2,CBS	550	54	12602	2.54586	1	0.750486	74.2542
GO:0070279~vitamin B6 binding	6	0.762389	0.0850811	CTH,SHMT2,THNSL1,PSAT1,GPT2,CBS	550	54	12602	2.54586	1	0.750486	74.2542
GO:0000774~adenyl-nucleotide exchange factor activity	2	0.25413	0.0852345	GRPEL2,GRPEL1	550	2	12602	22.9127	1	0.744118	74.32
GO:0004825~methionine-tRNA ligase activity	2	0.25413	0.0852345	MARS2,MARS	550	2	12602	22.9127	1	0.744118	74.32
GO:0004831~tyrosine-tRNA ligase activity	2	0.25413	0.0852345	YARS,YARS2	550	2	12602	22.9127	1	0.744118	74.32
GO:0003899~DNA-directed RNA polymerase activity	5	0.635324	0.0883501	CD3EAP,POLRMT,POLR3H,POLR1C,POLR1B	550	39	12602	2.93753	1	0.750298	75.6228
GO:0034062~RNA polymerase activity	5	0.635324	0.0883501	CD3EAP,POLRMT,POLR3H,POLR1C,POLR1B	550	39	12602	2.93753	1	0.750298	75.6228
GO:0015082~di-, tri-valent inorganic cation transmembrane transporter activity	5	0.635324	0.0883501	ATP2C1,SLC30A1,SLC30A2,SLC31A2,SLC40A1	550	39	12602	2.93753	1	0.750298	75.6228
GO:0005159~insulin-like growth factor receptor binding	3	0.381194	0.0936859	SOCS2,SHC1,PIK3R1	550	12	12602	5.72818	1	0.764764	77.7114
GO:0004721~phosphoprotein phosphatase activity	12	1.52478	0.096488	DUSP5,PTPN6,PTPRE,DUSP1,PPM1H,SSH3,PTP4A2,PPP2CB,DUSP10,CDKN3,DUSP8,PTPDC1	550	162	12602	1.69724	1	0.768819	78.7402
GO:0003714~transcription corepressor activity	11	1.39771	0.0980282	ATF3,RELB,RYBP,CBX4,TRIB3,MXD1,TBL1X,DDIT3,TOB1,MXD4,SFRS2	550	144	12602	1.75028	1	0.768136	79.2865

## Sheet: 24h_MF_Jurkat
Table S6. GO term enrichment
Term	Count	%	PValue	Genes	List Total	Pop Hits	Pop Total	Fold Enrichment	Bonferroni	Benjamini	FDR
GO:0046870~cadmium ion binding	6	3.26087	3.04571e-08	MT1A,MT1E,MT1JP,MT1H,MT1G,MT1X,MT1F	135	10	12602	56.0089	1.05077e-05	1.05077e-05	4.15665e-05
GO:0004860~protein kinase inhibitor activity	5	2.71739	0.000552989	CDKN1A,CDKN2C,TRIB3,DNAJC3,TRIB2	135	36	12602	12.965	0.17373	0.0910061	0.752059
GO:0019210~kinase inhibitor activity	5	2.71739	0.000614947	CDKN1A,CDKN2C,TRIB3,DNAJC3,TRIB2	135	37	12602	12.6146	0.191215	0.0682965	0.835995
GO:0005507~copper ion binding	6	3.26087	0.000624864	MT1A,MT1E,MT1JP,MT1H,MT1G,MT1X,MT1F	135	65	12602	8.61675	0.193979	0.0524839	0.849423
GO:0051082~unfolded protein binding	7	3.80435	0.00117446	DNAJB2,HSPA1A,DNAJB1,CCT6A,HSPA5,HSPD1,HSPA1B,SERPINH1	135	111	12602	5.88682	0.333308	0.0778851	1.591
GO:0019207~kinase regulator activity	6	3.26087	0.00296162	CDKN1A,CDKN2C,TRIB3,DNAJC3,TRIB2,PIK3R1	135	92	12602	6.08792	0.640584	0.156796	3.96705
GO:0017076~purine nucleotide binding	32	17.3913	0.00821756	MKNK2,PRKDC,TRIB3,PKMYT1,HSPA1A,ASNS,CLK1,HSPA1B,RIOK1,TRIB2,SETX,ACTG2,ARL5A,PAK2,RAB23,HSPA6,HSPA5,TUBB3,ACTA1,KIF5B,AIFM1,MYO1G,CCT6A,PCK2,ACADVL,MAPK1,ICK,NOLC1,ULK1,ATP2A3,DYRK1A,HSPD1,RASD1	135	1894	12602	1.57716	0.941969	0.334144	10.6503
GO:0019887~protein kinase regulator activity	5	2.71739	0.0103709	CDKN1A,CDKN2C,TRIB3,DNAJC3,TRIB2	135	80	12602	5.83426	0.972584	0.362104	13.2618
GO:0030554~adenyl nucleotide binding	27	14.6739	0.0128552	MKNK2,TRIB3,PKMYT1,PRKDC,HSPA1A,ASNS,HSPA1B,CLK1,RIOK1,TRIB2,SETX,ACTG2,PAK2,HSPA6,HSPA5,ACTA1,KIF5B,AIFM1,MYO1G,CCT6A,ACADVL,MAPK1,ICK,NOLC1,ULK1,ATP2A3,DYRK1A,HSPD1	135	1561	12602	1.61461	0.988482	0.391026	16.1868
GO:0000166~nucleotide binding	35	19.0217	0.0141784	MKNK2,PRKDC,TRIB3,PKMYT1,HSPA1A,ASNS,CLK1,HSPA1B,RIOK1,TRIB2,SETX,ACTG2,ARL5A,PAK2,RAB23,HSPA6,HSPA5,TUBB3,HNRNPAB,ACTA1,KIF5B,AIFM1,MYO1G,CCT6A,PCK2,HNRNPA1,ACADVL,MAPK1,ICK,NOLC1,ULK1,ATP2A3,DYRK1A,HSPD1,RASD1,MATR3	135	2213	12602	1.47636	0.992749	0.388998	17.7071
GO:0032555~purine ribonucleotide binding	30	16.3043	0.0144799	MKNK2,PRKDC,TRIB3,PKMYT1,HSPA1A,ASNS,HSPA1B,CLK1,RIOK1,TRIB2,SETX,ACTG2,ARL5A,PAK2,RAB23,HSPA6,HSPA5,TUBB3,ACTA1,KIF5B,MYO1G,CCT6A,PCK2,MAPK1,ICK,NOLC1,ULK1,ATP2A3,DYRK1A,HSPD1,RASD1	135	1813	12602	1.54465	0.993475	0.367113	18.0499
GO:0032553~ribonucleotide binding	30	16.3043	0.0144799	MKNK2,PRKDC,TRIB3,PKMYT1,HSPA1A,ASNS,HSPA1B,CLK1,RIOK1,TRIB2,SETX,ACTG2,ARL5A,PAK2,RAB23,HSPA6,HSPA5,TUBB3,ACTA1,KIF5B,MYO1G,CCT6A,PCK2,MAPK1,ICK,NOLC1,ULK1,ATP2A3,DYRK1A,HSPD1,RASD1	135	1813	12602	1.54465	0.993475	0.367113	18.0499
GO:0001883~purine nucleoside binding	27	14.6739	0.0154346	MKNK2,TRIB3,PKMYT1,PRKDC,HSPA1A,ASNS,HSPA1B,CLK1,RIOK1,TRIB2,SETX,ACTG2,PAK2,HSPA6,HSPA5,ACTA1,KIF5B,AIFM1,MYO1G,CCT6A,ACADVL,MAPK1,ICK,NOLC1,ULK1,ATP2A3,DYRK1A,HSPD1	135	1585	12602	1.59016	0.995329	0.360588	19.1268
GO:0001882~nucleoside binding	27	14.6739	0.016749	MKNK2,TRIB3,PKMYT1,PRKDC,HSPA1A,ASNS,HSPA1B,CLK1,RIOK1,TRIB2,SETX,ACTG2,PAK2,HSPA6,HSPA5,ACTA1,KIF5B,AIFM1,MYO1G,CCT6A,ACADVL,MAPK1,ICK,NOLC1,ULK1,ATP2A3,DYRK1A,HSPD1	135	1596	12602	1.5792	0.997054	0.361259	20.5878
GO:0005524~ATP binding	25	13.587	0.0198029	MKNK2,TRIB3,PKMYT1,PRKDC,ASNS,HSPA1A,HSPA1B,CLK1,RIOK1,TRIB2,SETX,ACTG2,PAK2,HSPA6,HSPA5,ACTA1,KIF5B,MYO1G,CCT6A,MAPK1,ICK,NOLC1,ATP2A3,ULK1,DYRK1A,HSPD1	135	1462	12602	1.59624	0.998993	0.389146	23.8887
GO:0004857~enzyme inhibitor activity	8	4.34783	0.0214429	CDKN1A,CDKN2C,TRIB3,HSPA5,DNAJC3,SERPINH1,TRIB2,ANXA2	135	261	12602	2.86125	0.999435	0.39259	25.6083
GO:0032559~adenyl ribonucleotide binding	25	13.587	0.0229479	MKNK2,TRIB3,PKMYT1,PRKDC,ASNS,HSPA1A,HSPA1B,CLK1,RIOK1,TRIB2,SETX,ACTG2,PAK2,HSPA6,HSPA5,ACTA1,KIF5B,MYO1G,CCT6A,MAPK1,ICK,NOLC1,ATP2A3,ULK1,DYRK1A,HSPD1	135	1482	12602	1.5747	0.999668	0.393821	27.1547
GO:0004672~protein kinase activity	13	7.06522	0.0260585	TRIM28,MKNK2,PKMYT1,TRIB3,PRKDC,CLK1,RIOK1,TRIB2,MAPK1,ICK,PAK2,ULK1,DYRK1A	135	600	12602	2.02254	0.999889	0.414827	30.2568
GO:0004674~protein serine/threonine kinase activity	10	5.43478	0.0375268	MAPK1,ICK,PAK2,ULK1,DYRK1A,MKNK2,PKMYT1,PRKDC,CLK1,RIOK1	135	425	12602	2.19643	0.999998	0.519586	40.6671
GO:0047115~trans-1,2-dihydrobenzene-1,2-diol dehydrogenase activity	2	1.08696	0.0418642	AKR1C3,DHDH	135	4	12602	46.6741	1	0.540004	44.214
GO:0043565~sequence-specific DNA binding	12	6.52174	0.0542776	EGR1,FOS,ATF3,TSHZ1,JUN,TRIM28,JUND,FOXC1,HSPD1,FOSB,DDIT3,HNRNPAB	135	599	12602	1.87008	1	0.618123	53.3089
GO:0032403~protein complex binding	6	3.26087	0.0580948	CDKN1A,YWHAZ,ULK1,ICAM3,FCGRT,PIK3R1	135	196	12602	2.8576	1	0.625911	55.8163
GO:0001948~glycoprotein binding	3	1.63043	0.058691	PTPRC,STX1A,LGALS1	135	37	12602	7.56877	1	0.612677	56.1964
GO:0015082~di-, tri-valent inorganic cation transmembrane transporter activity	3	1.63043	0.0644186	ATP2A3,SLC30A1,SLC30A2	135	39	12602	7.18063	1	0.631681	59.6972
GO:0043566~structure-specific DNA binding	5	2.71739	0.0648107	EGR1,FOS,JUN,HSPD1,HNRNPA1	135	142	12602	3.28691	1	0.618337	59.9272
GO:0019901~protein kinase binding	5	2.71739	0.070257	MAPK1,PTPRC,CDKN2C,VIM,TRIB3	135	146	12602	3.19685	1	0.634061	62.9974
GO:0003688~DNA replication origin binding	2	1.08696	0.0721165	HSPD1,HNRNPAB	135	7	12602	26.6709	1	0.629607	63.9948
GO:0008201~heparin binding	4	2.17391	0.094774	PTPRC,HBEGF,MDK,CYR61	135	102	12602	3.66071	1	0.719811	74.3055

## Sheet: 6h_BP_HMDM
Table S6. GO term enrichment
Term	Count	%	PValue	Genes	List Total	Pop Hits	Pop Total	Fold Enrichment	Bonferroni	Benjamini	FDR
GO:0012501~programmed cell death	104	7.40741	2.11738e-13	TSPO,IL19,FOXO3,TNFSF12,ITSN1,CRADD,CTNNB1,APP,TIAM2,IL1B,IL1A,FAM82A2,IL24,PIM2,STK4,AHR,DDIT4,F3,TNFAIP8,RIPK2,MAPK7,TNFAIP3,EIF2AK2,TNFRSF6B,TRAF1,FGD2,LITAF,MCL1,ADORA2A,TNFRSF12A,BCL2L2,GREM1,HSPE1,DYRK2,DDX41,BMF,TRAF5,FGD3,DNAJA3,SRGN,HIP1,PTPN6,VAV3,RYBP,TAX1BP1,ATM,TRAF3IP2,DNASE2,TNFSF10,RHOT1,HSPD1,PUF60,STEAP3,IER3,GPR109B,ZMAT3,GPR109A,BNIP3,ARHGAP4,CASP5,GPX1,NISCH,CASP7,BAG3,PAK1,E…	1073	602	13123	2.11286	7.86115e-10	7.86115e-10	3.90288e-10
GO:0006915~apoptosis	102	7.26496	4.94647e-13	TSPO,IL19,FOXO3,TNFSF12,ITSN1,CRADD,CTNNB1,APP,TIAM2,IL1B,IL1A,FAM82A2,IL24,PIM2,STK4,AHR,DDIT4,F3,TNFAIP8,RIPK2,MAPK7,TNFAIP3,EIF2AK2,TNFRSF6B,TRAF1,FGD2,LITAF,MCL1,ADORA2A,TNFRSF12A,BCL2L2,GREM1,HSPE1,DYRK2,DDX41,BMF,TRAF5,FGD3,DNAJA3,SRGN,HIP1,PTPN6,VAV3,RYBP,TAX1BP1,ATM,TRAF3IP2,DNASE2,TNFSF10,RHOT1,HSPD1,PUF60,STEAP3,IER3,ZMAT3,GPR109B,GPR109A,BNIP3,ARHGAP4,CASP5,GPX1,NISCH,CASP7,BAG3,PAK1,E…	1073	593	13123	2.10368	1.83647e-09	9.18233e-10	9.1176e-10
GO:0042981~regulation of apoptosis	124	8.83191	2.33266e-12	PTGS2,WFS1,ARNT2,IL19,TLR2,TNFSF12,FOXO3,ITSN1,CRADD,BTK,APP,TIAM2,CD44,VNN1,IL1B,NQO1,IL1A,SOCS2,PTPRF,SOCS3,SKP2,PIM1,PIM3,POLB,PIM2,CSDA,STK4,MAPK1,F3,VEGFA,TNFAIP8,RIPK2,HSPB1,DCUN1D3,TNFAIP3,FGD2,TNFRSF6B,TRAF1,MCL1,ADORA2A,BCL2L2,HSPA1A,HSPA1B,GCLM,PLAGL1,TUBB,HSPE1,DYRK2,BMF,TRAF5,FGD3,DNAJA3,PLAGL2,HIP1,ANGPTL4,CARD9,VAV3,SPHK2,SMAD6,PHB,NR4A2,TAX1BP1,ATM,CDKN1A,TNFSF10,ETS1,HSPD1,DNAJB6,…	1073	801	13123	1.89331	8.66128e-09	2.88709e-09	4.30014e-09
GO:0043067~regulation of programmed cell death	124	8.83191	4.71076e-12	PTGS2,WFS1,ARNT2,IL19,TLR2,TNFSF12,FOXO3,ITSN1,CRADD,BTK,APP,TIAM2,CD44,VNN1,IL1B,NQO1,IL1A,SOCS2,PTPRF,SOCS3,SKP2,PIM1,PIM3,POLB,PIM2,CSDA,STK4,MAPK1,F3,VEGFA,TNFAIP8,RIPK2,HSPB1,DCUN1D3,TNFAIP3,FGD2,TNFRSF6B,TRAF1,MCL1,ADORA2A,BCL2L2,HSPA1A,HSPA1B,GCLM,PLAGL1,TUBB,HSPE1,DYRK2,BMF,TRAF5,FGD3,DNAJA3,PLAGL2,HIP1,ANGPTL4,CARD9,VAV3,SPHK2,SMAD6,PHB,NR4A2,TAX1BP1,ATM,CDKN1A,TNFSF10,ETS1,HSPD1,DNAJB6,…	1073	809	13123	1.87459	1.74912e-08	4.37279e-09	8.68398e-09
GO:0010941~regulation of cell death	124	8.83191	6.11732e-12	PTGS2,WFS1,ARNT2,IL19,TLR2,TNFSF12,FOXO3,ITSN1,CRADD,BTK,APP,TIAM2,CD44,VNN1,IL1B,NQO1,IL1A,SOCS2,PTPRF,SOCS3,SKP2,PIM1,PIM3,POLB,PIM2,CSDA,STK4,MAPK1,F3,VEGFA,TNFAIP8,RIPK2,HSPB1,DCUN1D3,TNFAIP3,FGD2,TNFRSF6B,TRAF1,MCL1,ADORA2A,BCL2L2,HSPA1A,HSPA1B,GCLM,PLAGL1,TUBB,HSPE1,DYRK2,BMF,TRAF5,FGD3,DNAJA3,PLAGL2,HIP1,ANGPTL4,CARD9,VAV3,SPHK2,SMAD6,PHB,NR4A2,TAX1BP1,ATM,CDKN1A,TNFSF10,ETS1,HSPD1,DNAJB6,…	1073	812	13123	1.86767	2.27136e-08	4.54273e-09	1.12768e-08
GO:0016265~death	113	8.04843	6.34107e-12	TSPO,ATP6AP1,IL19,TNFSF12,FOXO3,ITSN1,CRADD,CTNNB1,APP,TIAM2,IL1B,IL1A,FAM82A2,POLB,PIM2,IL24,STK4,AHR,DDIT4,F3,TNFAIP8,RIPK2,HSPB1,MAPK7,TNFAIP3,EIF2AK2,TNFRSF6B,TRAF1,FGD2,LITAF,MCL1,ADORA2A,TNFRSF12A,MMD,BCL2L2,GREM1,ATN1,HSPE1,DYRK2,DDX41,BMF,TRAF5,FGD3,DNAJA3,SRGN,HIP1,PTPN6,VAV3,NR4A2,RYBP,TAX1BP1,ATM,TRAF3IP2,DNASE2,TNFSF10,RHOT1,HSPD1,PUF60,STEAP3,IER3,GPR109B,ZMAT3,GPR109A,BNIP3,ARHGAP4,…	1073	714	13123	1.93559	2.35443e-08	3.92405e-09	1.16892e-08
GO:0008219~cell death	112	7.97721	9.01244e-12	TSPO,ATP6AP1,IL19,TNFSF12,FOXO3,ITSN1,CRADD,CTNNB1,APP,TIAM2,IL1B,IL1A,FAM82A2,POLB,PIM2,IL24,STK4,AHR,DDIT4,F3,TNFAIP8,RIPK2,HSPB1,MAPK7,TNFAIP3,EIF2AK2,TNFRSF6B,TRAF1,FGD2,LITAF,MCL1,ADORA2A,TNFRSF12A,MMD,BCL2L2,GREM1,ATN1,HSPE1,DYRK2,DDX41,BMF,TRAF5,FGD3,DNAJA3,SRGN,HIP1,PTPN6,VAV3,RYBP,TAX1BP1,ATM,TRAF3IP2,DNASE2,TNFSF10,RHOT1,HSPD1,PUF60,STEAP3,IER3,GPR109B,ZMAT3,GPR109A,BNIP3,ARHGAP4,CASP5,…	1073	709	13123	1.93199	3.34633e-08	4.78046e-09	1.66138e-08
GO:0043066~negative regulation of apoptosis	67	4.77208	1.18701e-10	IER3,WFS1,ARNT2,BNIP3,ITSN1,GPX1,CLCF1,BAG3,HMOX1,VNN1,IL1B,CAT,IL1A,IRAK1,NOL3,SOCS2,SOCS3,PIM1,SKP2,PIM3,POLB,PIM2,CSDA,SERPINB9,PROK2,BTG2,F3,HIPK2,TNFAIP8,VEGFA,SERPINB2,HSPB1,RIPK2,ADAM17,SEMA4D,PRNP,TNFAIP3,TNFRSF6B,CSF2,MCL1,ADORA2A,BCL2L2,HSPA1A,HSPA1B,GCLM,SH3GLB1,BCL2,RB1CC1,BCL3,BCL6,DNAJA3,ANGPTL4,ERCC2,IL6,GIMAP5,SPHK2,SMAD6,ANXA1,NR4A2,ANXA5,SOD1,BIRC3,ATM,TAX1BP1,SOD2,CDKN1A,BNIP3L…	1073	353	13123	2.32131	4.40737e-07	5.50922e-08	2.18816e-07
GO:0043069~negative regulation of programmed cell death	67	4.77208	2.21561e-10	IER3,WFS1,ARNT2,BNIP3,ITSN1,GPX1,CLCF1,BAG3,HMOX1,VNN1,IL1B,CAT,IL1A,IRAK1,NOL3,SOCS2,SOCS3,PIM1,SKP2,PIM3,POLB,PIM2,CSDA,SERPINB9,PROK2,BTG2,F3,HIPK2,TNFAIP8,VEGFA,SERPINB2,HSPB1,RIPK2,ADAM17,SEMA4D,PRNP,TNFAIP3,TNFRSF6B,CSF2,MCL1,ADORA2A,BCL2L2,HSPA1A,HSPA1B,GCLM,SH3GLB1,BCL2,RB1CC1,BCL3,BCL6,DNAJA3,ANGPTL4,ERCC2,IL6,GIMAP5,SPHK2,SMAD6,ANXA1,NR4A2,ANXA5,SOD1,BIRC3,ATM,TAX1BP1,SOD2,CDKN1A,BNIP3L…	1073	358	13123	2.28889	8.22654e-07	9.1406e-08	4.0843e-07
GO:0060548~negative regulation of cell death	67	4.77208	2.50282e-10	IER3,WFS1,ARNT2,BNIP3,ITSN1,GPX1,CLCF1,BAG3,HMOX1,VNN1,IL1B,CAT,IL1A,IRAK1,NOL3,SOCS2,SOCS3,PIM1,SKP2,PIM3,POLB,PIM2,CSDA,SERPINB9,PROK2,BTG2,F3,HIPK2,TNFAIP8,VEGFA,SERPINB2,HSPB1,RIPK2,ADAM17,SEMA4D,PRNP,TNFAIP3,TNFRSF6B,CSF2,MCL1,ADORA2A,BCL2L2,HSPA1A,HSPA1B,GCLM,SH3GLB1,BCL2,RB1CC1,BCL3,BCL6,DNAJA3,ANGPTL4,ERCC2,IL6,GIMAP5,SPHK2,SMAD6,ANXA1,NR4A2,ANXA5,SOD1,BIRC3,ATM,TAX1BP1,SOD2,CDKN1A,BNIP3L…	1073	359	13123	2.28252	9.29296e-07	9.29297e-08	4.61375e-07
GO:0006916~anti-apoptosis	42	2.99145	5.93831e-08	TNFRSF6B,CSF2,IER3,MCL1,BNIP3,BCL2L2,HSPA1A,HSPA1B,GPX1,SH3GLB1,HMOX1,BAG3,BCL2,VNN1,IL1B,IL1A,IRAK1,NOL3,SPHK2,SOCS2,SOCS3,ANXA1,SKP2,POLB,PIM2,ANXA5,BIRC3,SOD1,TAX1BP1,SOD2,PROK2,SERPINB9,F3,VEGFA,BNIP3L,TNFAIP8,SERPINB2,HSPB1,ADAM17,RIPK2,SEMA4D,TNFAIP3,PRNP	1073	205	13123	2.5057	0.000220465	2.00443e-05	0.000109468
GO:0006955~immune response	90	6.41026	4.10408e-07	KYNU,AQP9,IL16,IL19,TLR2,BNIP3,TLR5,TNFSF12,HLA-DMB,HLA-DMA,TLR7,CXCL10,MBP,CLEC4E,LILRA3,CCL3L1,HAMP,CCL3L3,IL1B,VNN1,ERAP2,CLEC4D,IL1A,PAG1,EBI3,CIITA,CMKLR1,NCF4,CCL4L1,CCL4L2,GEM,NLRP3,FCAMR,HLA-F,OSM,CD83,C1QBP,LILRB5,ULBP1,VEGFA,ADAM17,TREM1,SEMA4D,PTAFR,PSMB10,CCL1,CXCL1,CSF2,IL1F9,SBNO2,CCL3,CXCL5,CXCL2,GPR65,ACP5,PRKDC,CXCL6,GCH1,TNFRSF1B,TUBB,CCL23,CYP27B1,CCL20,BCL2,BCL3,HLA-DPB1,INPP5…	1073	642	13123	1.71451	0.00152268	0.000126979	0.000756552
GO:0042127~regulation of cell proliferation	105	7.47863	4.19895e-07	PTGS2,PDGFB,ATP6AP1,ARNT2,EDN1,FGFRL1,TNFSF12,CXCL10,CTNNB1,CD47,CDKN2B,SERPINE1,IL1B,ASPH,IL1A,EBI3,SYK,IRS2,PTPRF,SIX5,CD40,PPP1CB,VASH1,VEGFB,HES1,MAPK1,HHEX,HIF1A,F3,VEGFA,TGIF1,RIPK2,PMP22,EIF2AK2,ADORA2A,IFI30,TIMP2,SESN1,TIMP1,PIN1,TRAF5,DNAJA3,MAFG,PTPN6,ODC1,BMP2,TESC,SPHK2,PHB,WDR6,SLAMF1,CDKN1A,ATF3,ETS1,LAMA5,CD274,PLAU,NAMPT,E2F3,IGFBP7,E2F7,GPX1,CCL3L1,HMOX1,HLX,CCL3L3,TGFA,CDK10,CS…	1073	786	13123	1.6338	0.00155786	0.000119921	0.000774042
GO:0043065~positive regulation of apoptosis	66	4.70085	6.92422e-07	PTGS2,GPR109B,ZMAT3,GPR109A,IL19,TLR2,BNIP3,FOXO3,TNFSF12,ITSN1,CRADD,BTK,ARHGAP4,ACVR1B,GPX1,APP,CD44,TIAM2,PCBP4,HMOX1,IL1B,NDUFS3,NQO1,FOSL1,ARHGEF3,PTPRF,ARHGEF18,ARHGEF6,SKP2,IFI16,NLRP3,STK4,MAPK1,HIPK2,RIPK2,DCUN1D3,FGD2,ADORA2A,PRKDC,GCH1,PLAGL1,TUBB,SH3GLB1,BCL2,PYCARD,BCL3,PPP3CC,BCL6,DYRK2,INPP5D,FGD3,DNAJA3,PLAGL2,HIP1,ERCC2,PHLDA1,IL2RA,VAV3,SOD1,ATM,TNFSF10,CDKN1A,DUSP1,ETS1,BNIP3L,…	1073	428	13123	1.88596	0.00256766	0.000183623	0.00127642
GO:0010033~response to organic substance	97	6.90883	7.53263e-07	ADCY3,EIF2C2,ADCY7,AQP9,PTGS2,PDGFB,ARNT2,TLR2,CTNNB1,CD48,CD44,CDKN2B,IL1B,RARA,SUPT5H,DNAJC3,EIF2B4,CIITA,IRS2,SOCS2,SOCS3,STRN3,SOCS1,MAPK1,RIPK2,HSPB1,EIF2AK2,PANX1,MCL1,ADORA2A,ACP5,ACP2,HSPA1A,HSPA1B,SERPINH1,TTC3,HSPE1,SCARB1,ERO1L,DNAJA3,CARD9,MAP2K1,CFB,PTPN2,IL1RN,NR4A2,GART,CDKN1A,ALDH2,HSPD1,PTPN1,DNAJB1,PARP1,DNAJB6,DNAJB5,KYNU,IGFBP7,VGF,HSPH1,CCNE1,HMOX1,SERPINA1,FOSL1,IRAK2,EGR1,I…	1073	718	13123	1.65227	0.00279296	0.00018644	0.00138857
GO:0009611~response to wounding	76	5.41311	8.83709e-07	ADORA3,PDGFB,TLR2,TLR5,TLR7,CXCL10,GPX1,SLC1A3,CD44,CCL3L1,HMOX1,SERPINE1,CCL3L3,VNN1,IL1B,SERPINA1,IL1A,CIITA,IRAK2,NFKBIZ,PDPN,CCL4L1,CCL4L2,CD40,NLRP3,PLAUR,PROK2,TNFAIP6,PRKCQ,HIF1A,CD36,ADM,EREG,F3,KIAA1715,TFPI,SERPINB2,RIPK2,ADAM17,VCAN,PTAFR,TPST1,CXCL1,CCL3,ADORA2A,TNC,CXCL2,FPR2,CXCL6,TNFRSF1B,CCL23,CCL20,BCL2,SCARB1,PAPSS2,PTPN6,BMP2,IL6,IL2RA,MAP2K1,IL8,CFB,EFEMP2,MAP2K3,IL1RN,ANXA1,C…	1073	522	13123	1.78064	0.00327584	0.000205055	0.00162904
GO:0043068~positive regulation of programmed cell death	66	4.70085	8.86875e-07	PTGS2,GPR109B,ZMAT3,GPR109A,IL19,TLR2,BNIP3,FOXO3,TNFSF12,ITSN1,CRADD,BTK,ARHGAP4,ACVR1B,GPX1,APP,CD44,TIAM2,PCBP4,HMOX1,IL1B,NDUFS3,NQO1,FOSL1,ARHGEF3,PTPRF,ARHGEF18,ARHGEF6,SKP2,IFI16,NLRP3,STK4,MAPK1,HIPK2,RIPK2,DCUN1D3,FGD2,ADORA2A,PRKDC,GCH1,PLAGL1,TUBB,SH3GLB1,BCL2,PYCARD,BCL3,PPP3CC,BCL6,DYRK2,INPP5D,FGD3,DNAJA3,PLAGL2,HIP1,ERCC2,PHLDA1,IL2RA,VAV3,SOD1,ATM,TNFSF10,CDKN1A,DUSP1,ETS1,BNIP3L,…	1073	431	13123	1.87284	0.00328755	0.000193685	0.00163487
GO:0010942~positive regulation of cell death	66	4.70085	1.04026e-06	PTGS2,GPR109B,ZMAT3,GPR109A,IL19,TLR2,BNIP3,FOXO3,TNFSF12,ITSN1,CRADD,BTK,ARHGAP4,ACVR1B,GPX1,APP,CD44,TIAM2,PCBP4,HMOX1,IL1B,NDUFS3,NQO1,FOSL1,ARHGEF3,PTPRF,ARHGEF18,ARHGEF6,SKP2,IFI16,NLRP3,STK4,MAPK1,HIPK2,RIPK2,DCUN1D3,FGD2,ADORA2A,PRKDC,GCH1,PLAGL1,TUBB,SH3GLB1,BCL2,PYCARD,BCL3,PPP3CC,BCL6,DYRK2,INPP5D,FGD3,DNAJA3,PLAGL2,HIP1,ERCC2,PHLDA1,IL2RA,VAV3,SOD1,ATM,TNFSF10,CDKN1A,DUSP1,ETS1,BNIP3L,…	1073	433	13123	1.86419	0.00385502	0.000214559	0.00191761
GO:0008283~cell proliferation	65	4.62963	2.1597e-06	TSPO,PDGFB,UCHL1,CLK1,CDC16,CTNNB1,GPX1,DKC1,HMOX1,INSIG1,TGFA,FRAT2,IL15RA,IL1A,IMPDH2,SYK,MT3,IRS2,PDXK,PDPN,PIM1,SKP2,IFI16,CD40,PIM2,MXD1,OSM,VEGFB,PROK2,HHEX,EREG,NAB2,TXN,VEGFA,RIPK2,TXNRD1,BIN1,C6ORF108,BCAT1,CXCL1,ZMYND11,NDP,SIPA1,BCL2L2,FKBP1A,BOP1,HPRT1,NR2C2,ZFP36L2,DOCK2,STAT4,BCL2,WDR12,SCARB1,CSF1R,ERCC2,IL2RA,MAP2K1,SPHK2,CSRP2,TNFSF9,APPL2,LAMA5,CD274,HSPD1	1073	433	13123	1.83594	0.00798691	0.000421962	0.00398117
GO:0042330~taxis	32	2.2792	3.66138e-06	CXCL1,CCL1,CCL3,CXCL5,IL16,PDGFB,CXCL2,FPR1,FPR3,CXCL6,FPR2,CXCL10,DOCK2,CCL23,CCL20,CCL3L1,CCL3L3,IL1B,FOSL1,SYK,IL6,MAP2K1,IL8,CMKLR1,CCL19,CCL4L1,CCL4L2,PLAUR,MAPK1,PROK2,CMTM8,CMTM7,PLAU,PTAFR	1073	158	13123	2.477	0.0135027	0.000679505	0.00674925
GO:0006935~chemotaxis	32	2.2792	3.66138e-06	CXCL1,CCL1,CCL3,CXCL5,IL16,PDGFB,CXCL2,FPR1,FPR3,CXCL6,FPR2,CXCL10,DOCK2,CCL23,CCL20,CCL3L1,CCL3L3,IL1B,FOSL1,SYK,IL6,MAP2K1,IL8,CMKLR1,CCL19,CCL4L1,CCL4L2,PLAUR,MAPK1,PROK2,CMTM8,CMTM7,PLAU,PTAFR	1073	158	13123	2.477	0.0135027	0.000679505	0.00674925
GO:0050867~positive regulation of cell activation	25	1.78063	8.13927e-06	TNFSF12,HLA-DMA,CD47,HLX,PVRL2,VNN1,IL1B,BCL6,RARA,INPP5D,IL13RA1,DNAJA3,EBI3,SYK,IL6,IL2RA,GIMAP5,PDPN,CD40,CD83,PRKCQ,CDKN1A,CD80,RIPK2,HSPD1	1073	111	13123	2.75455	0.0297691	0.00143807	0.015003
GO:0051251~positive regulation of lymphocyte activation	23	1.63818	8.55645e-06	IL6,IL2RA,GIMAP5,TNFSF12,CD40,HLA-DMA,CD47,CD83,PRKCQ,CDKN1A,CD80,HLX,RIPK2,IL1B,VNN1,RARA,BCL6,HSPD1,INPP5D,IL13RA1,DNAJA3,EBI3,SYK	1073	97	13123	2.89994	0.0312709	0.00144306	0.015772
GO:0008285~negative regulation of cell proliferation	55	3.91738	9.54413e-06	PTGS2,IGFBP7,E2F7,FGFRL1,CDKN2B,CCL3L1,HMOX1,CCL3L3,IL1B,CDK10,ASPH,CSK,FOSL1,IL1A,PTPRF,SIX5,VASH1,OSM,BTG2,ADM,EREG,BTG1,BTG3,TGIF1,EIF2AK2,PMP22,CXCL1,ING5,ADORA2A,IFI30,TIMP2,SESN1,TRIB1,CYP27B1,CCL23,BCL2,BCL6,INPP5D,PPAP2A,DNAJA3,CEBPA,PTPN6,IL6,TESC,BMP2,IL2RA,IL8,JARID2,PHB,WDR6,SOD2,CDKN1A,ETS1,CD274,ATP5A1,TOB1	1073	361	13123	1.86333	0.034817	0.00153958	0.0175924
GO:0002696~positive regulation of leukocyte activation	24	1.7094	1.17487e-05	IL6,IL2RA,GIMAP5,TNFSF12,CD40,HLA-DMA,CD47,CD83,PRKCQ,CDKN1A,CD80,HLX,PVRL2,RIPK2,IL1B,VNN1,RARA,BCL6,HSPD1,INPP5D,IL13RA1,DNAJA3,EBI3,SYK	1073	106	13123	2.7691	0.0426854	0.00181598	0.0216556
GO:0051789~response to protein stimulus	24	1.7094	1.38287e-05	HSPA1A,HSPA1B,VARS,SERPINH1,TTC3,CD48,HSPH1,HSPA2,BCL2,HSPA6,HSPE1,ERO1L,DNAJC3,EGR1,HSP90AA1,CFB,NR4A2,ID1,HSPB1,HSPD1,DNAJB1,EIF2AK2,PPP1R15A,DNAJB6,DNAJB5	1073	107	13123	2.74322	0.0500503	0.00205174	0.025489
GO:0002237~response to molecule of bacterial origin	21	1.49573	1.4651e-05	IRAK1,IL6,CARD9,PTGS2,SOCS3,SOCS1,TLR2,TRIB1,GCH1,MAPK1,CYP27B1,ADM,ADAM17,RIPK2,IL1B,SERPINA1,SCARB1,PTAFR,MGST1,ABCC5,VLDLR	1073	86	13123	2.98644	0.0529464	0.00209011	0.0270046
GO:0050865~regulation of cell activation	32	2.2792	3.11469e-05	PDGFB,ADORA2A,TNFSF12,HLA-DMA,CD47,HMOX1,HLX,PVRL2,VNN1,IL1B,RARA,BCL6,INPP5D,IL13RA1,HLA-DOA,EBI3,PAG1,DNAJA3,SYK,IL6,GIMAP5,IL2RA,PDPN,CD40,SOD1,CD83,PRKCQ,CDKN1A,CD80,CD274,RIPK2,HSPD1	1073	175	13123	2.23638	0.109213	0.00427418	0.0574013
GO:0006986~response to unfolded protein	18	1.28205	4.24849e-05	HSP90AA1,CFB,HSPA1A,HSPA1B,VARS,SERPINH1,HSPH1,HSPA2,HSPA6,HSPB1,HSPE1,DNAJB1,HSPD1,ERO1L,DNAJC3,EIF2AK2,PPP1R15A,DNAJB6,DNAJB5	1073	71	13123	3.10061	0.145937	0.00561808	0.0782887
GO:0034097~response to cytokine stimulus	19	1.35328	5.18594e-05	IRAK2,CIITA,IRAK1,KYNU,PTGS2,MCL1,SOCS3,SOCS1,ACP5,CTNNB1,GCH1,CCNE1,CYP27B1,CDKN2B,BCL2,RIPK2,SERPINA1,FOSL1,DNAJA3	1073	79	13123	2.94144	0.175154	0.00661797	0.0955557
GO:0006954~inflammatory response	48	3.4188	5.67289e-05	ADORA3,TLR2,TLR5,TLR7,CXCL10,CD44,CCL3L1,HMOX1,CCL3L3,VNN1,IL1B,SERPINA1,IL1A,CIITA,IRAK2,NFKBIZ,PDPN,CCL4L1,CCL4L2,CD40,NLRP3,PROK2,TNFAIP6,HIF1A,F3,RIPK2,PTAFR,CXCL1,TPST1,CCL3,ADORA2A,CXCL2,FPR2,CXCL6,TNFRSF1B,CCL23,CCL20,IL6,BMP2,IL2RA,IL8,CFB,MAP2K3,IL1RN,ANXA1,CCL19,CD55,LTA4H,ALOX5,BMP6	1073	320	13123	1.83453	0.189935	0.00699675	0.104524
GO:0070482~response to oxygen levels	27	1.92308	5.85155e-05	PDGFB,EDN1,ARNT2,BNIP3,EGLN1,PLOD2,HMOX1,BCL2,SERPINA1,MT3,ANGPTL4,NOL3,PDPN,SOCS3,NR4A2,BIRC2,SOD2,DDIT4,PRKCQ,CDKN1A,HIF1A,ADM,VEGFA,ALDH2,ADAM17,PLAU,VLDLR	1073	140	13123	2.35868	0.195291	0.00698434	0.107814
GO:0051249~regulation of lymphocyte activation	28	1.9943	5.86646e-05	ADORA2A,TNFSF12,HLA-DMA,CD47,HLX,VNN1,IL1B,RARA,BCL6,INPP5D,IL13RA1,HLA-DOA,PAG1,DNAJA3,EBI3,SYK,IL6,IL2RA,GIMAP5,CD40,SOD1,CD83,PRKCQ,CDKN1A,CD80,CD274,RIPK2,HSPD1	1073	148	13123	2.31382	0.195736	0.00678401	0.108088
GO:0002694~regulation of leukocyte activation	30	2.13675	7.19546e-05	ADORA2A,TNFSF12,HLA-DMA,CD47,HMOX1,HLX,PVRL2,VNN1,IL1B,RARA,BCL6,INPP5D,IL13RA1,HLA-DOA,PAG1,DNAJA3,EBI3,SYK,IL6,GIMAP5,IL2RA,CD40,SOD1,CD83,PRKCQ,CDKN1A,CD80,CD274,RIPK2,HSPD1	1073	166	13123	2.21028	0.234462	0.00806358	0.13256
GO:0019318~hexose metabolic process	33	2.35043	7.20983e-05	LDHA,PFKFB3,SLC37A4,PGD,PGAM1,UGDH,HIBADH,GALK1,GALM,TPI1,NISCH,PGAM4,GYS1,GAPDH,IRS2,PDK3,PFKP,GALT,PPP1CC,FUCA1,PPP1CB,PMM2,PGM3,GPI,RENBP,PPP1CA,GBE1,ATF3,SDS,PKM2,GFPT2,PGM1,PGK1	1073	191	13123	2.11307	0.234871	0.00784293	0.132824
GO:0045597~positive regulation of cell differentiation	37	2.63533	7.79245e-05	CSF2,PDLIM7,TNFRSF12A,FOXO3,HLA-DMA,EPHB2,CTNNB1,CCNE1,ACVR1B,CYP27B1,CDKN2B,BCL2,HLX,JUND,VNN1,RARA,INPP5D,RUNX1,SYK,SH3PXD2B,BMP2,IL6,TESC,IL2RA,GIMAP5,MAP2K1,PTPRF,SOCS3,CD83,HIF1A,CD36,CD80,BTG1,ETS1,TGIF1,SEMA4D,BMP6	1073	226	13123	2.00229	0.251246	0.00823292	0.14355
GO:0001819~positive regulation of cytokine production	20	1.4245	9.8046e-05	IL6,CARD9,GIMAP5,PANX1,TLR2,CD40,SOD1,NLRP3,TLR7,CD83,HIF1A,EREG,PYCARD,RIPK2,BCL3,IL1B,ADAM17,RARA,HSPD1,IL1A	1073	90	13123	2.71782	0.305152	0.0100619	0.180586
GO:0051094~positive regulation of developmental process	42	2.99145	0.00011817	CSF2,PDLIM7,TNFRSF12A,FOXO3,TNFSF12,HLA-DMA,EPHB2,CTNNB1,CCNE1,ACVR1B,CYP27B1,CDKN2B,BCL2,HLX,JUND,IL1B,VNN1,RARA,INPP5D,RUNX1,IL1A,ANGPTL4,SYK,SH3PXD2B,BMP2,IL6,TESC,IL2RA,GIMAP5,MAP2K1,PTPRF,SOCS3,CD83,HIF1A,CD36,CD80,ETS1,BTG1,F3,TGIF1,SEMA4D,BMP6	1073	275	13123	1.86788	0.355185	0.0117892	0.217613
GO:0032496~response to lipopolysaccharide	18	1.28205	0.000126082	IRAK1,PTGS2,SOCS3,SOCS1,TRIB1,GCH1,MAPK1,CYP27B1,ADM,ADAM17,RIPK2,IL1B,SERPINA1,SCARB1,PTAFR,MGST1,ABCC5,VLDLR	1073	77	13123	2.85901	0.373854	0.0122447	0.232167
GO:0006091~generation of precursor metabolites and energy	44	3.1339	0.00013826	ATP5D,LDHA,ECH1,GNPDA1,NDUFB7,COX10,ATP6AP1,CYC1,PGAM1,VGF,NDUFS7,TPI1,SLC1A3,PGAM4,NDUFS8,IDH2,GYS1,CAT,ERO1L,NDUFS3,GAPDH,GLRX,CEBPA,NDUFB10,PFKP,IDH3B,PPP1CC,CYB561,PPP1CB,SOD2,GPI,PPP1CA,GBE1,ATP6V0E2,NDUFV1,PKM2,TXN,PGM1,GFPT2,ATP6V0A1,TXNRD1,ATP5A1,PGK1,STEAP1	1073	295	13123	1.82416	0.40154	0.0130777	0.254565
GO:0007626~locomotory behavior	41	2.92023	0.000163467	CXCL1,CCL1,CCL3,CXCL5,IL16,PDGFB,ADORA2A,CXCL2,UCHL1,FPR1,FPR3,CXCL6,FPR2,CXCL10,DOCK2,APP,CCL23,CCL20,CCL3L1,CCL3L3,IL1B,SEPP1,FOSL1,SYK,IL6,MAP2K1,IL8,CMKLR1,TBCE,NR4A2,CCL4L1,CCL19,CCL4L2,SOD1,PLAUR,SOD2,MAPK1,PROK2,HIPK2,CMTM8,CMTM7,PLAU,PTAFR	1073	270	13123	1.85718	0.455019	0.0150605	0.300911
GO:0050863~regulation of T cell activation	23	1.63818	0.000175523	IL6,GIMAP5,IL2RA,ADORA2A,SOD1,HLA-DMA,CD47,CD83,PRKCQ,CD80,HLX,CD274,RIPK2,IL1B,VNN1,RARA,BCL6,HSPD1,HLA-DOA,DNAJA3,PAG1,EBI3,SYK	1073	117	13123	2.40423	0.478879	0.0157712	0.323068
GO:0005996~monosaccharide metabolic process	35	2.49288	0.000241069	LDHA,GNPDA1,PFKFB3,SLC37A4,PGD,PGAM1,UGDH,NAGK,HIBADH,GALK1,GALM,TPI1,NISCH,PGAM4,GYS1,GAPDH,IRS2,PDK3,PFKP,GALT,PPP1CC,FUCA1,PPP1CB,PMM2,PGM3,GPI,RENBP,PPP1CA,GBE1,ATF3,SDS,PKM2,PGM1,GFPT2,PGK1	1073	221	13123	1.93691	0.591473	0.0210887	0.443459
GO:0001817~regulation of cytokine production	30	2.13675	0.000338352	PANX1,TLR2,IGF2BP2,TLR7,HMOX1,PYCARD,IL1B,BCL3,RARA,BCL6,INPP5D,EBI3,SRGN,IL1A,SYK,IL6,CARD9,GIMAP5,MAP2K3,CD40,SOD1,NLRP3,CD83,PRKCQ,HIF1A,EREG,CD80,ADAM17,RIPK2,HSPD1	1073	181	13123	2.0271	0.715355	0.0287984	0.621889
GO:0051174~regulation of phosphorus metabolic process	62	4.41595	0.00034107	ADCY3,C13ORF18,ADCY7,PDGFB,EDN1,SDC4,CAMKK2,SPRY2,APP,CDKN2B,CLCF1,SPRED2,TGFA,IL1B,PAK1,FAM129A,CDK5RAP1,SERTAD1,SYK,IRAK1,LIMK2,SOCS3,SOCS1,PICK1,PIM1,PPP1CB,OSM,SPAG9,PROK2,CD80,EREG,ADAM17,GADD45B,GADD45A,CSF2,ADORA2A,FPR1,FKBP1A,PIN1,TRIB1,TSPYL2,BCL2,RB1CC1,PPAP2A,DNAJA3,GPS1,IL6,BMP2,VAV3,SPHK2,MAP2K1,SMAD6,MAP2K3,RCAN1,SOD1,CDC25B,CDKN1A,DUSP2,LRP8,TNK2,DUSP6,VLDLR	1073	480	13123	1.57973	0.718215	0.0283762	0.626871
GO:0019220~regulation of phosphate metabolic process	62	4.41595	0.00034107	ADCY3,C13ORF18,ADCY7,PDGFB,EDN1,SDC4,CAMKK2,SPRY2,APP,CDKN2B,CLCF1,SPRED2,TGFA,IL1B,PAK1,FAM129A,CDK5RAP1,SERTAD1,SYK,IRAK1,LIMK2,SOCS3,SOCS1,PICK1,PIM1,PPP1CB,OSM,SPAG9,PROK2,CD80,EREG,ADAM17,GADD45B,GADD45A,CSF2,ADORA2A,FPR1,FKBP1A,PIN1,TRIB1,TSPYL2,BCL2,RB1CC1,PPAP2A,DNAJA3,GPS1,IL6,BMP2,VAV3,SPHK2,MAP2K1,SMAD6,MAP2K3,RCAN1,SOD1,CDC25B,CDKN1A,DUSP2,LRP8,TNK2,DUSP6,VLDLR	1073	480	13123	1.57973	0.718215	0.0283762	0.626871
GO:0050870~positive regulation of T cell activation	17	1.21083	0.000351878	IL6,GIMAP5,IL2RA,HLA-DMA,CD47,CD83,PRKCQ,CD80,HLX,RIPK2,IL1B,VNN1,RARA,HSPD1,DNAJA3,EBI3,SYK	1073	76	13123	2.7357	0.729302	0.0286214	0.646674
GO:0042325~regulation of phosphorylation	60	4.2735	0.000373234	ADCY3,ADCY7,PDGFB,EDN1,SDC4,CAMKK2,SPRY2,APP,CDKN2B,CLCF1,SPRED2,TGFA,IL1B,PAK1,CDK5RAP1,FAM129A,SERTAD1,SYK,IRAK1,LIMK2,SOCS3,SOCS1,PICK1,PIM1,PPP1CB,OSM,SPAG9,PROK2,CD80,EREG,ADAM17,GADD45B,GADD45A,CSF2,ADORA2A,FPR1,FKBP1A,PIN1,TRIB1,TSPYL2,BCL2,RB1CC1,PPAP2A,DNAJA3,GPS1,IL6,BMP2,VAV3,MAP2K1,SPHK2,SMAD6,MAP2K3,SOD1,CDC25B,CDKN1A,DUSP2,LRP8,TNK2,DUSP6,VLDLR	1073	462	13123	1.58834	0.749946	0.0296827	0.685795
GO:0006917~induction of apoptosis	45	3.20513	0.000377803	FGD2,ADORA2A,ZMAT3,IL19,TLR2,BNIP3,FOXO3,TNFSF12,ITSN1,CRADD,GCH1,BTK,PLAGL1,ARHGAP4,GPX1,ACVR1B,APP,TUBB,TIAM2,SH3GLB1,PCBP4,HMOX1,PYCARD,BCL3,DYRK2,NDUFS3,FGD3,HIP1,ERCC2,PLAGL2,PHLDA1,ARHGEF3,VAV3,ARHGEF6,ARHGEF18,IFI16,NLRP3,ATM,MAPK1,TNFSF10,CDKN1A,ETS1,HIPK2,BNIP3L,PPP1R13B	1073	318	13123	1.73069	0.754153	0.0294109	0.694161
GO:0051186~cofactor metabolic process	31	2.20798	0.000382137	NAMPT,KYNU,TSPO,COX10,PGD,UROS,GCLM,HIBADH,GCH1,GPX1,AGPAT6,TPI1,HMOX1,MCEE,GSTK1,IDH2,VNN1,VNN2,VNN3,NAPRT1,MTHFD2L,PDXK,HMBS,IDH3B,NADK,SOD1,SOD2,CIAO1,ISCU,CTNS,MGST1	1073	191	13123	1.98501	0.758079	0.0291328	0.702098
GO:0002684~positive regulation of immune system process	36	2.5641	0.000400806	TLR2,CACNB3,TNFSF12,HLA-DMA,TLR7,CD47,HLX,PVRL2,VNN1,IL1B,RARA,BCL6,INPP5D,IL13RA1,EBI3,DNAJA3,SYK,IRAK2,IRAK1,IL6,CARD9,IL2RA,GIMAP5,CFB,CD40,MAPK1,CD83,PRKCQ,CD55,CDKN1A,EREG,CD80,VEGFA,ADAM17,RIPK2,HSPD1	1073	236	13123	1.86562	0.774287	0.0299206	0.736278
GO:0012502~induction of programmed cell death	45	3.20513	0.0004041	FGD2,ADORA2A,ZMAT3,IL19,TLR2,BNIP3,FOXO3,TNFSF12,ITSN1,CRADD,GCH1,BTK,PLAGL1,ARHGAP4,GPX1,ACVR1B,APP,TUBB,TIAM2,SH3GLB1,PCBP4,HMOX1,PYCARD,BCL3,DYRK2,NDUFS3,FGD3,HIP1,ERCC2,PLAGL2,PHLDA1,ARHGEF3,VAV3,ARHGEF6,ARHGEF18,IFI16,NLRP3,ATM,MAPK1,TNFSF10,CDKN1A,ETS1,HIPK2,BNIP3L,PPP1R13B	1073	319	13123	1.72526	0.777032	0.0295685	0.742308
GO:0007242~intracellular signaling cascade	135	9.61538	0.000427879	ADCY3,GNA15,RAB9A,ADCY7,EDN1,TLR2,RRAD,TLR5,ITSN1,TLR7,BTK,CTNNB1,PTGIR,TIAM2,SPRED2,IL1B,RARA,RAB20,PAG1,SYK,SOCS2,SOCS3,SOCS1,CYP26A1,GEM,STK4,TANK,SPAG9,MAPK1,RND3,CD36,RAB13,MAPK7,NEURL2,WNT5A,RAB7B,GRAP,ADORA2A,SIPA1,MAPKAPK3,ASB13,AKAP11,MAPKAPK2,ABCA1,RAB40B,RASAL1,DYRK2,CDC42EP4,DNAJA3,ARHGDIB,VAV3,MAP2K1,MAP2K3,RAB7L1,SHANK3,ATM,TRAF3IP2,PLCG1,ARF4,RHOT1,RIT1,TNK2,PLCXD1,WASF2,CAMKK2,ARH…	1073	1245	13123	1.32617	0.795881	0.0306775	0.785826
GO:0051726~regulation of cell cycle	46	3.27635	0.000449672	XPO1,PTGS2,AURKAIP1,SIPA1,EDN1,BRSK1,INTS3,BOP1,CDC16,ZBTB17,PIN1,APP,TSPYL2,CDKN2B,PCBP4,BCL2,TGFA,IL1B,RANBP1,BCL6,CDK10,CDK5RAP1,FOSL1,SERTAD1,IL1A,ERCC2,BMP2,DDB1,SMAD6,PIM1,SKP2,PIM3,PPP1CB,ATM,OSM,PRKCQ,CDKN1A,EREG,ETS1,BTG3,ADAM17,PPP1R13B,DCUN1D3,MAD2L2,GADD45B,GADD45A	1073	330	13123	1.70482	0.811754	0.0316053	0.825694
GO:0045765~regulation of angiogenesis	15	1.06838	0.000454017	IL6,TNFSF12,VASH1,HHEX,HIF1A,ID1,BTG1,HMOX1,F3,SERPINE1,IL1B,MAPK7,RUNX1,IL1A,ANGPTL4	1073	63	13123	2.91195	0.814769	0.0313134	0.833642
GO:0001666~response to hypoxia	24	1.7094	0.000503589	NOL3,PDGFB,SOCS3,EDN1,ARNT2,NR4A2,BNIP3,EGLN1,BIRC2,SOD2,DDIT4,PRKCQ,HIF1A,ADM,PLOD2,HMOX1,BCL2,VEGFA,ADAM17,SERPINA1,PLAU,MT3,ANGPTL4,VLDLR	1073	134	13123	2.19048	0.845922	0.0340422	0.924263
GO:0006006~glucose metabolic process	26	1.85185	0.000568829	LDHA,PGD,SLC37A4,PGAM1,UGDH,HIBADH,TPI1,NISCH,PGAM4,GYS1,GAPDH,IRS2,PDK3,PFKP,GALT,PPP1CC,PPP1CB,PGM3,GPI,PPP1CA,ATF3,GBE1,SDS,PKM2,PGM1,PGK1	1073	152	13123	2.09201	0.879084	0.0376837	1.04341
GO:0008284~positive regulation of cell proliferation	54	3.84615	0.000648928	NAMPT,E2F3,PTGS2,PDGFB,ATP6AP1,EDN1,ARNT2,TNFSF12,CXCL10,CD47,HLX,IL1B,TGFA,IL13RA1,FOSL1,SERTAD1,EBI3,SYK,IRS2,CD40,PPP1CB,HES1,VEGFB,CIAO1,OSM,MAPK1,PRKCQ,HIF1A,ADM,CD80,EREG,F3,HIPK2,VEGFA,TGIF1,RIPK2,ADAM17,CSF2,CXCL5,TIMP1,BCL2,BCL6,TRAF5,DNAJA3,ODC1,IL6,IL2RA,SPHK2,SLAMF1,CDC25B,CAPN1,CDKN1A,ATF3,HBEGF	1073	413	13123	1.59911	0.910207	0.0421272	1.18951
GO:0014070~response to organic cyclic substance	22	1.56695	0.000667718	PTGS2,ADORA2A,SOCS3,IGFBP7,FKBP1A,AK3L1,BIRC2,CTNNB1,CD83,CCNE1,PRKCQ,CDKN1A,ACSL1,CDKN2B,BTG2,CD44,HMOX1,BCL2,ALDH2,IL1B,SERPINA1,FOSL1	1073	120	13123	2.2422	0.916262	0.0425769	1.22375
GO:0007243~protein kinase cascade	49	3.49003	0.000757619	EDN1,TLR2,TLR5,TLR7,CAMKK2,BTK,CLCF1,HMOX1,SPRED2,IL1B,TGFA,PAK1,TNIP2,SYK,IRAK2,IRAK1,SOCS2,SOCS3,ARHGEF6,SOCS1,STK4,TANK,OSM,SH2D3C,PROK2,SPAG9,MAPK1,MAPK7,GADD45B,WNT5A,FPR1,AKAP11,MAPKAPK2,TRIB1,STAT4,RASGRP3,RB1CC1,BCL3,GPS1,FYB,MAP2K1,MAP2K3,SOD1,SHANK3,STAT2,RPS6KA3,DUSP2,RPS6KA2,DUSP6	1073	367	13123	1.63291	0.940042	0.0473608	1.38743
GO:0001525~angiogenesis	25	1.78063	0.000809177	TNFRSF12A,EDN1,WASF2,TNFSF12,CTNNB1,GPX1,ARHGAP22,PTK2,HMOX1,IL1B,ZC3H12A,TGFA,ANGPTL4,IL8,MMP19,ARHGAP24,NCL,PROK2,GPI,HIF1A,EREG,LAMA5,ID1,VEGFA,PLAU	1073	147	13123	2.07997	0.950496	0.0496681	1.48118
GO:0051272~positive regulation of cell motion	19	1.35328	0.000882319	IRS2,IL6,MAP2K1,PDGFB,PDPN,EDN1,CXCL10,MAPK1,SPAG9,PRR5,HIF1A,ETS1,F3,BCL2,VEGFA,HBEGF,ADAM17,SCARB1,BCL6	1073	98	13123	2.37116	0.962277	0.0531598	1.61404
GO:0040017~positive regulation of locomotion	19	1.35328	0.000882319	IRS2,IL6,MAP2K1,PDGFB,IL16,IL8,PDPN,EDN1,CXCL10,MAPK1,SPAG9,PRR5,HIF1A,F3,BCL2,VEGFA,HBEGF,ADAM17,SCARB1	1073	98	13123	2.37116	0.962277	0.0531598	1.61404
GO:0040012~regulation of locomotion	30	2.13675	0.000905515	PDGFB,IL16,ADORA2A,EDN1,ABI3,GREM1,VCL,TRIB1,CXCL10,PRR5,NISCH,SERPINE2,HMOX1,BCL2,SCARB1,IRS2,IL6,MAP2K1,IL8,PDPN,VASH1,SPAG9,MAPK1,HIF1A,LAMA5,CLIC4,F3,VEGFA,ADAM17,HBEGF	1073	192	13123	1.91097	0.965393	0.0536498	1.65614
GO:0010740~positive regulation of protein kinase cascade	27	1.92308	0.00094961	CSF2,LITAF,SLC20A1,FKBP1A,ITSN1,CTNNB1,GPX1,CLCF1,HMOX1,IL1B,RHOC,CAT,TRAF5,IL6,LTBR,CARD9,PIM2,CD40,BIRC2,TRAF3IP2,OSM,TNFSF10,ATP2C1,F3,HIPK2,RIPK2,HTR2B	1073	166	13123	1.98925	0.970624	0.0553081	1.73612
GO:0006796~phosphate metabolic process	105	7.47863	0.00107261	ATP6AP1,CLK1,PRKX,BTK,APP,MAP3K8,IL1B,SYK,PTPRF,PICK1,PIM1,PIM3,PIM2,PPP1CC,PPP1CB,STK4,PTPRO,SPAG9,MAPK1,PPP1CA,MAPK6,RIOK3,RIPK2,MAPK7,EIF2AK2,SSH3,SSH2,MAPKAPK3,ACP5,MAPKAPK2,EPHB2,GPD1L,PTK2,PTPLA,DYRK2,CSF1R,PTPN6,BMP2,MAP2K1,PTPN2,MAP2K3,DUSP23,PTPN12,ATM,ATP6V0E2,NDUFV1,PTPN1,GK,TNK2,MERTK,ABL2,ATP5D,SLC20A1,COX10,CAMKK2,NDUFS7,ACVR1B,NDUFS8,EEF2K,TGFA,CDK10,PAK1,CSK,NDUFS3,IRAK2,IRAK1,NDU…	1073	950	13123	1.35176	0.981403	0.0612913	1.9589
GO:0006793~phosphorus metabolic process	105	7.47863	0.00107261	ATP6AP1,CLK1,PRKX,BTK,APP,MAP3K8,IL1B,SYK,PTPRF,PICK1,PIM1,PIM3,PIM2,PPP1CC,PPP1CB,STK4,PTPRO,SPAG9,MAPK1,PPP1CA,MAPK6,RIOK3,RIPK2,MAPK7,EIF2AK2,SSH3,SSH2,MAPKAPK3,ACP5,MAPKAPK2,EPHB2,GPD1L,PTK2,PTPLA,DYRK2,CSF1R,PTPN6,BMP2,MAP2K1,PTPN2,MAP2K3,DUSP23,PTPN12,ATM,ATP6V0E2,NDUFV1,PTPN1,GK,TNK2,MERTK,ABL2,ATP5D,SLC20A1,COX10,CAMKK2,NDUFS7,ACVR1B,NDUFS8,EEF2K,TGFA,CDK10,PAK1,CSK,NDUFS3,IRAK2,IRAK1,NDU…	1073	950	13123	1.35176	0.981403	0.0612913	1.9589
GO:0006458~'de novo' protein folding	7	0.498575	0.00114709	TOR3A,SH3GLB1,FKBP1A,DNAJB1,ERO1L,HSPD1,HLA-DMA	1073	16	13123	5.35071	0.9859	0.0644189	2.09356
GO:0031099~regeneration	15	1.06838	0.00118529	SOCS3,SOCS1,AXL,PLAUR,NOTCH3,CCNE1,GPX1,PRKCQ,CDKN1A,ADM,ATIC,BCL2,SERPINE1,VCAN,PLAU	1073	69	13123	2.65874	0.987767	0.0655039	2.16257
GO:0009615~response to virus	20	1.4245	0.00123957	XPO1,ABCE1,IL6,CARD9,BNIP3,CCL19,CCL4L1,CCL4L2,IFI16,NLRP3,TLR7,STAT2,PLSCR1,BCL2,BNIP3L,C19ORF2,BCL3,EIF2AK2,DNAJC3,FOSL1,IFNGR1	1073	109	13123	2.24407	0.990002	0.0673998	2.26053
GO:0030334~regulation of cell migration	27	1.92308	0.00124189	PDGFB,EDN1,ABI3,GREM1,VCL,TRIB1,CXCL10,PRR5,NISCH,SERPINE2,HMOX1,BCL2,SCARB1,IL6,IRS2,MAP2K1,PDPN,VASH1,SPAG9,MAPK1,HIF1A,LAMA5,CLIC4,F3,VEGFA,ADAM17,HBEGF	1073	169	13123	1.95394	0.990088	0.066548	2.26471
GO:0006575~cellular amino acid derivative metabolic process	26	1.85185	0.00133591	KYNU,SRM,HPRT1,GCLM,CKB,GCH1,GPX1,AGPAT6,SLC1A3,P4HA2,P4HA1,ASMTL,GSTK1,VNN1,SMOX,VNN2,VNN3,ODC1,PLA2G15,MAT2A,NR4A2,SOD1,SOD2,CTNS,SMS,MGST1	1073	161	13123	1.97506	0.993012	0.0703929	2.43417
GO:0050671~positive regulation of lymphocyte proliferation	13	0.925926	0.00135026	IL6,IL2RA,CD40,PRKCQ,CDKN1A,CD80,RIPK2,IL1B,BCL6,IL13RA1,EBI3,DNAJA3,SYK	1073	55	13123	2.89077	0.993375	0.0701286	2.46003
GO:0007005~mitochondrion organization	23	1.63818	0.00148215	CEBPA,TSPO,GRPEL1,HSP90AA1,GIMAP5,SAMM50,COX10,TOMM40,BNIP3,BCS1L,PIM2,TIMM44,SOD2,NDUFS7,GPX1,POLRMT,MRPL12,SH3GLB1,CASP7,BCL2,GFM1,NDUFS8,DNAJA3	1073	136	13123	2.06834	0.995943	0.0756606	2.69722
GO:0045621~positive regulation of lymphocyte differentiation	10	0.712251	0.00157941	CD83,GIMAP5,IL2RA,CD80,HLX,VNN1,RARA,INPP5D,HLA-DMA,SYK	1073	35	13123	3.49434	0.997174	0.0793377	2.87179
GO:0070665~positive regulation of leukocyte proliferation	13	0.925926	0.0015932	IL6,IL2RA,CD40,PRKCQ,CDKN1A,CD80,RIPK2,IL1B,BCL6,IL13RA1,EBI3,DNAJA3,SYK	1073	56	13123	2.83915	0.997316	0.0789363	2.89651
GO:0032946~positive regulation of mononuclear cell proliferation	13	0.925926	0.0015932	IL6,IL2RA,CD40,PRKCQ,CDKN1A,CD80,RIPK2,IL1B,BCL6,IL13RA1,EBI3,DNAJA3,SYK	1073	56	13123	2.83915	0.997316	0.0789363	2.89651
GO:0009967~positive regulation of signal transduction	40	2.849	0.0017662	CSF2,TWSG1,SLC20A1,LITAF,FKBP1A,ITSN1,CTNNB1,GPX1,ACVR1B,CYP27B1,CDKN2B,CLCF1,HMOX1,TGFA,IL1B,RHOC,CAT,TRAF5,SYK,BMP2,IL6,CARD9,LTBR,PIM2,CD40,BIRC2,OSM,TRAF3IP2,HHEX,TNFSF10,HIF1A,EREG,CD80,ATP2C1,F3,HIPK2,VEGFA,ADAM17,RIPK2,HTR2B	1073	294	13123	1.66397	0.998589	0.0859898	3.2062
GO:0051101~regulation of DNA binding	21	1.49573	0.00182863	IRAK2,IRAK1,IL6,PIM1,TLR2,EGLN1,NLRP3,TRIB1,PRKCQ,ID1,HMOX1,HIPK2,PYCARD,CALM3,RIPK2,BCL3,IL1B,CAT,APEX1,CALM2,DNAJA3,ERCC2	1073	121	13123	2.1226	0.998882	0.0877458	3.31773
GO:0044093~positive regulation of molecular function	69	4.91453	0.00184913	ADCY3,GNA15,ADORA3,ADCY7,PDGFB,EDN1,TLR2,CDC16,SDC4,TGFA,IL1B,CAT,PAK1,PLCB2,SYK,ANAPC1,IRAK2,IRAK1,ANAPC5,ANAPC4,PICK1,PIM1,NLRP3,PPP1CB,SPAG9,PRKCQ,PROK2,HIF1A,PSMA6,EREG,F3,HIPK2,RIPK2,ADAM17,GADD45B,PSMB10,ADORA2A,FPR1,FKBP1A,GCLM,GCH1,PIN1,CYP27B1,BCL2,PYCARD,HSPE1,SCARB1,PPAP2A,DNAJA3,HIP1,NR1H3,ERCC2,IL6,VAV3,SPHK2,MAP2K1,MAP2K3,NR4A2,SOD1,PSMB8,CDC25B,P2RY11,GSPT1,CALM3,LRP8,HSPD1,HTR2B,A…	1073	585	13123	1.44254	0.998964	0.0875566	3.35434
GO:0009991~response to extracellular stimulus	32	2.2792	0.00194372	KYNU,LDHA,PTGS2,IGFBP7,VARS,ASGR1,CCNE1,CYP27B1,ACSL1,CDKN2B,CD44,MAP1LC3A,HMOX1,BCL2,IL1B,RARA,FOSL1,MUC1,BMP2,SCAMP3,SOCS3,CFB,AXL,NR4A2,SOD1,SOD2,CDKN1A,DUSP1,ADM,ATG4C,ALOX5,VLDLR	1073	220	13123	1.77894	0.999271	0.0906755	3.52302
GO:0046634~regulation of alpha-beta T cell activation	10	0.712251	0.00195568	CD83,GIMAP5,CD80,ADORA2A,HLX,RIPK2,RARA,BCL6,EBI3,SYK	1073	36	13123	3.39728	0.999303	0.0900785	3.54435
GO:0051270~regulation of cell motion	29	2.06553	0.00203932	PDGFB,EDN1,ABI3,GREM1,VCL,TRIB1,CXCL10,PRR5,NISCH,SERPINE2,HMOX1,BCL2,SCARB1,BCL6,IL6,IRS2,MAP2K1,PDPN,VASH1,SPAG9,MAPK1,HIF1A,LAMA5,CLIC4,ETS1,F3,VEGFA,ADAM17,HBEGF	1073	193	13123	1.8377	0.999489	0.0926035	3.69323
GO:0030335~positive regulation of cell migration	17	1.21083	0.00210325	IRS2,IL6,MAP2K1,PDGFB,PDPN,EDN1,CXCL10,SPAG9,MAPK1,PRR5,HIF1A,F3,BCL2,VEGFA,HBEGF,ADAM17,SCARB1	1073	89	13123	2.3361	0.999597	0.0942183	3.80691
GO:0043122~regulation of I-kappaB kinase/NF-kappaB cascade	19	1.35328	0.00222715	CARD9,LTBR,LITAF,SLC20A1,FKBP1A,PIM2,CD40,BIRC2,TRAF3IP2,TNFSF10,ATP2C1,HMOX1,RIPK2,IL1B,RHOC,TNFAIP3,HTR2B,TRAF5,DNAJA3	1073	106	13123	2.1922	0.999746	0.0983084	4.02683
GO:0045580~regulation of T cell differentiation	12	0.854701	0.00233277	CD83,GIMAP5,IL2RA,CD80,HLX,VNN1,RARA,BCL6,HLA-DOA,SOD1,HLA-DMA,SYK	1073	51	13123	2.87769	0.999829	0.101526	4.21395
GO:0010647~positive regulation of cell communication	43	3.06268	0.00237043	CSF2,TWSG1,SLC20A1,PTGS2,LITAF,ADORA2A,FKBP1A,ITSN1,CTNNB1,GPX1,ACVR1B,CYP27B1,SLC1A3,CDKN2B,CLCF1,HMOX1,TGFA,IL1B,RHOC,CAT,TRAF5,SYK,BMP2,IL6,CARD9,LTBR,PIM2,CD40,BIRC2,OSM,TRAF3IP2,HHEX,TNFSF10,HIF1A,EREG,CD80,ATP2C1,F3,HIPK2,VEGFA,ADAM17,RIPK2,HTR2B	1073	328	13123	1.60335	0.999851	0.101889	4.28058
GO:0042035~regulation of cytokine biosynthetic process	15	1.06838	0.00238589	IL6,CARD9,MAP2K3,IGF2BP2,TLR7,PRKCQ,CD80,EREG,HMOX1,BCL3,IL1B,INPP5D,IL1A,EBI3,SYK	1073	74	13123	2.47909	0.999859	0.101349	4.30792
GO:0006732~coenzyme metabolic process	24	1.7094	0.00241199	NAMPT,KYNU,MTHFD2L,PDXK,PGD,IDH3B,NADK,SOD1,GCLM,HIBADH,SOD2,GCH1,GPX1,TPI1,AGPAT6,MCEE,GSTK1,IDH2,VNN1,CTNS,VNN2,MGST1,NAPRT1,VNN3	1073	150	13123	1.95683	0.999872	0.101245	4.35406
GO:0007264~small GTPase mediated signal transduction	40	2.849	0.00254114	RAB7B,RAB9A,GRAP,WASF2,MAPKAPK3,RRAD,MAPKAPK2,ABCA1,ITSN1,RAB40B,ARHGAP4,ARL5A,NISCH,RASGRP3,HMOX1,RASL10A,RHOC,CDC42EP4,RAB20,DNAJA3,ARHGDIB,ARL2,ARHGEF3,VAV3,MAP2K1,RGS19,GEM,RAB7L1,MAPK1,SH2D3C,RND3,RASL11A,ARF4,RHOT1,RIT1,RAB38,RAB13,TNK2,RASD1,RAPGEFL1	1073	300	13123	1.63069	0.999921	0.10519	4.58206
GO:0048469~cell maturation	15	1.06838	0.00271805	CEBPA,PICK1,NR4A2,FOXO3,CDC25B,BTK,TIMP1,CTNNB1,HES1,APP,AGPAT6,EREG,VEGFA,AGRN,ERCC2	1073	75	13123	2.44604	0.999959	0.110868	4.89355
GO:0042060~wound healing	28	1.9943	0.00280771	PDGFB,ADORA2A,GPX1,CD44,HMOX1,SERPINE1,IL1B,SCARB1,SERPINA1,PAPSS2,IL6,EFEMP2,CD40,ANXA5,PLAUR,NOTCH3,PLSCR1,PRKCQ,HIF1A,CD36,EREG,F3,KIAA1715,SERPINB2,TFPI,ADAM17,HBEGF,PLAU	1073	188	13123	1.82152	0.999971	0.113076	5.05104
GO:0007049~cell cycle	85	6.05413	0.00304818	ADCY3,STEAP3,E2F3,E2F7,OSGIN2,CDC16,WTAP,CTNNB1,ACVR1B,CCNE1,APP,CDKN2B,PCBP4,MAP3K8,CDK10,RANBP1,SUPT5H,CCNA1,TUBB3,ARL2,ANAPC1,ANAPC5,PDPN,ANAPC4,PIM1,SKP2,GPR132,BANP,PIM2,PPP1CC,MCM3,PPP1CB,AHR,VASH1,MCM6,MAPK1,HHEX,PPM1G,PPP1CA,CHMP1B,PSMA6,EREG,MAPK6,NSL1,TOP3A,ADAM17,G0S2,MAPK7,MAD2L2,PPP1R15A,GADD45A,MAPRE3,PSMB10,BCAT1,ZMYND11,CAMK2G,SESN1,SESN3,PIN1,PLAGL1,PRR5,TUBB,CYP27B1,TSPYL2,HSPA2…	1073	766	13123	1.35714	0.999988	0.120858	5.47224
GO:0006979~response to oxidative stress	25	1.78063	0.00312137	PTGS2,GCLM,GPX1,SLC23A2,BCL2,HMOX1,SERPINE1,NDUFS8,VNN1,SEPP1,CAT,NQO1,FOSL1,ERCC2,MT3,NAPRT1,MAP2K1,SOD1,SOD2,HIF1A,DUSP1,MTF1,TXNRD2,PRNP,SRXN1	1073	162	13123	1.88738	0.999991	0.122277	5.60008
GO:0032755~positive regulation of interleukin-6 production	7	0.498575	0.00314201	IL6,CARD9,TLR2,IL1B,RIPK2,HSPD1,TLR7	1073	19	13123	4.50586	0.999992	0.121755	5.63611
GO:0051329~interphase of mitotic cell cycle	18	1.28205	0.00320462	BCAT1,ANAPC5,CAMK2G,ANAPC4,PIM1,SKP2,GPR132,PPP1CB,CCNE1,ACVR1B,CDKN1A,APP,CDKN2B,GSPT1,BCL2,ADAM17,CDK10,GADD45A	1073	101	13123	2.17964	0.999993	0.122752	5.7453
GO:0010608~posttranscriptional regulation of gene expression	30	2.13675	0.00335607	NANOS3,METAP1,EIF2C2,EIF5,PRKDC,IFI30,IGF2BP2,MAPKAPK2,ZFP36L2,TNFRSF1B,APP,EIF3B,BCL2,BCL3,FAM129A,DNAJA3,EIF2B4,IL6,DDX1,EIF1B,RPS5,EIF4G1,EIF4B,MAPK1,SERBP1,VEGFA,HSPB1,HSPD1,PPP1R15A,MIF4GD	1073	209	13123	1.75553	0.999996	0.126873	6.00894
GO:0010627~regulation of protein kinase cascade	34	2.42165	0.00338744	CSF2,LITAF,SLC20A1,EDN1,FKBP1A,TIMP2,ITSN1,CTNNB1,GPX1,CLCF1,HMOX1,IL1B,RHOC,CAT,PAK1,TRAF5,DNAJA3,SYK,IL6,CARD9,LTBR,SOCS1,PIM2,CD40,BIRC2,TRAF3IP2,OSM,TNFSF10,ATP2C1,F3,HIPK2,RIPK2,TNFAIP3,HTR2B	1073	247	13123	1.68351	0.999997	0.126697	6.06347
GO:0045582~positive regulation of T cell differentiation	9	0.641026	0.00345123	CD83,GIMAP5,IL2RA,CD80,HLX,VNN1,RARA,HLA-DMA,SYK	1073	32	13123	3.43974	0.999997	0.127645	6.17424
GO:0034637~cellular carbohydrate biosynthetic process	14	0.997151	0.00349291	GLT25D1,PGD,PMM2,GPI,PGM3,TPI1,GBE1,ATF3,SDS,PGM1,CSGALNACT2,GYS1,EXT1,PTAFR	1073	69	13123	2.48149	0.999998	0.127818	6.24656
GO:0006952~defense response	69	4.91453	0.00358222	KYNU,ADORA3,TLR2,BNIP3,TLR5,TLR7,CXCL10,CD48,CD44,LILRA3,HAMP,CCL3L1,HMOX1,CCL3L3,HCP5,VNN1,IL1B,SERPINA1,FOSL1,IL1A,IRAK2,CIITA,NFKBIZ,PDPN,CCL4L1,CCL4L2,CD40,NLRP3,CD84,PROK2,TNFAIP6,CD83,HIF1A,LILRB5,F3,RIPK2,PTAFR,TPST1,CXCL1,CCL3,ADORA2A,CXCL2,FPR2,CXCL6,VARS,GCH1,TUBB,TNFRSF1B,CYP27B1,CCL23,CCL20,BCL2,BCL3,DNAJA3,BMP2,IL6,IL2RA,CARD9,IL8,CFB,MAP2K3,IL1RN,ANXA1,CCL19,KCNN4,CD55,P2RY11,BNIP3L…	1073	601	13123	1.40413	0.999998	0.129597	6.40134
GO:0032355~response to estradiol stimulus	12	0.854701	0.003744	CCNE1,SOCS2,PTGS2,DUSP1,PDGFB,SOCS3,STRN3,SOCS1,ARNT2,IL1B,RARA,SERPINA1	1073	54	13123	2.71782	0.999999	0.133751	6.68108
GO:0010324~membrane invagination	31	2.20798	0.00374438	PDLIM7,AP1B1,ADORA2A,SORL1,WASF2,SNX2,CDC42SE1,RABEPK,ABCA1,ITSN1,ASGR1,APP,ITGAV,SCARB1,TRIP10,EHD1,HIP1,SCAMP1,LRSAM1,ARC,ICAM5,CORO1C,AP2A2,CD36,LRP10,LRP12,LRP8,MERTK,BIN1,LRP3,VLDLR	1073	220	13123	1.72335	0.999999	0.132493	6.68172
GO:0006897~endocytosis	31	2.20798	0.00374438	PDLIM7,AP1B1,ADORA2A,SORL1,WASF2,SNX2,CDC42SE1,RABEPK,ABCA1,ITSN1,ASGR1,APP,ITGAV,SCARB1,TRIP10,EHD1,HIP1,SCAMP1,LRSAM1,ARC,ICAM5,CORO1C,AP2A2,CD36,LRP10,LRP12,LRP8,MERTK,BIN1,LRP3,VLDLR	1073	220	13123	1.72335	0.999999	0.132493	6.68172
GO:0002224~toll-like receptor signaling pathway	6	0.42735	0.00385987	IRAK2,IRAK1,TLR2,RIPK2,HSPD1,TLR7	1073	14	13123	5.24151	0.999999	0.135016	6.88094
GO:0046635~positive regulation of alpha-beta T cell activation	8	0.569801	0.00392935	CD83,GIMAP5,CD80,HLX,RIPK2,RARA,EBI3,SYK	1073	26	13123	3.76314	1	0.136001	7.0006
GO:0045766~positive regulation of angiogenesis	8	0.569801	0.00392935	HIF1A,BTG1,F3,IL1B,TNFSF12,RUNX1,IL1A,ANGPTL4	1073	26	13123	3.76314	1	0.136001	7.0006
GO:0055114~oxidation reduction	70	4.98575	0.00395157	STEAP3,LDHA,PTGS2,COX10,PGD,CYC1,HIBADH,ACOX3,NDUFS7,AKR1C3,AKR1C2,GPX1,AKR1C4,SLC1A3,P4HA2,P4HA1,PLOD2,HMOX1,NDUFS8,AKR7A2,MICAL1,SMOX,CAT,ASPH,NDUFS3,NQO1,HADH,GFOD1,IMPDH2,NDUFB10,NCF4,CYP26A1,DHRS9,POR,DHDH,ALDH3B1,DHRS1,TXN,TXNRD2,TXNRD1,LEPREL1,STEAP1,DUS2L,SRXN1,NDUFB7,UGDH,IFI30,EGLN1,GCLM,ALDH3A2,GPD1L,CYP27B1,NMRAL1,IDH2,PNPO,ERO1L,QSOX2,GAPDH,GLRX,DUS3L,PTGR1,MTHFD2L,IDH3B,SOD1,CRYZ,CY…	1073	614	13123	1.39432	1	0.135459	7.03884
GO:0051607~defense response to virus	7	0.498575	0.00418255	IL6,CARD9,BCL2,BNIP3L,BNIP3,NLRP3,TLR7	1073	20	13123	4.28057	1	0.141503	7.43543
GO:0016044~membrane organization	47	3.34758	0.00431635	PDLIM7,SAMM50,AP1B1,ADORA2A,WASF2,SORL1,SNX2,CDC42SE1,RABEPK,BNIP3,ABCA1,ITSN1,ASGR1,APP,DOCK2,SH3GLB1,ITGAV,BCL2,SCARB1,AGRN,EHD1,TRIP10,HIP1,SCAMP1,LRSAM1,ARC,HSP90AA1,GIMAP5,A4GALT,VAV3,ICAM5,PICK1,LMNA,SOD1,CORO1C,KCNN4,PLSCR1,AP2A2,CD36,LRP10,VAMP8,LRP12,LRP8,MERTK,BIN1,LRP3,VLDLR	1073	379	13123	1.51667	1	0.144385	7.66444
GO:0000082~G1/S transition of mitotic cell cycle	12	0.854701	0.00434244	BCAT1,CCNE1,ACVR1B,CDKN1A,GSPT1,CAMK2G,BCL2,PIM1,SKP2,ADAM17,GPR132,PPP1CB	1073	55	13123	2.66841	1	0.143903	7.70902
GO:0051325~interphase	18	1.28205	0.00437058	BCAT1,ANAPC5,CAMK2G,ANAPC4,PIM1,SKP2,GPR132,PPP1CB,CCNE1,ACVR1B,CDKN1A,APP,CDKN2B,GSPT1,BCL2,ADAM17,CDK10,GADD45A	1073	104	13123	2.11676	1	0.143491	7.75709
GO:0045619~regulation of lymphocyte differentiation	13	0.925926	0.00448843	GIMAP5,IL2RA,SOD1,HLA-DMA,CD83,CD80,HLX,VNN1,BCL6,RARA,INPP5D,HLA-DOA,SYK	1073	63	13123	2.52369	1	0.145788	7.95817
GO:0006470~protein amino acid dephosphorylation	21	1.49573	0.0047076	PTPN6,PTPRF,PTPN2,SSH3,SSH2,DUSP23,PPP1CC,PPP1CB,PTPRO,PTPN12,CDC25B,DUSP5,PPM1F,PPM1G,PPP1CA,DUSP2,DUSP1,BCL2,PTPLA,PTPN1,DUSP6	1073	131	13123	1.96057	1	0.15104	8.33099
GO:0044271~nitrogen compound biosynthetic process	41	2.92023	0.00478296	ATP5D,BCAT1,ADCY3,NAMPT,KYNU,TSPO,ATP1B3,SRM,ADCY7,ADORA2A,COX10,ATP6AP1,UROS,HPRT1,PPAT,PFAS,GCH1,SLC1A3,ATIC,ASMTL,PAPSS1,NQO1,GCHFR,IMPDH2,NAPRT1,CEBPA,ODC1,MTHFD2L,SPHK2,MAT2A,HMBS,NR4A2,ATP13A3,AMPD3,GART,ATP6V0E2,ADM,ATP2C1,ATP6V0A1,ATP5A1,SMS	1073	321	13123	1.56211	1	0.151963	8.45885
GO:0040008~regulation of growth	43	3.06268	0.0048063	ING5,TNFRSF12A,LGMN,IGFBP7,ZMAT3,ABTB2,SIPA1,FGFRL1,OSGIN1,VGF,GREM1,ACVR1B,AGPAT6,APP,PTK2,TSPYL2,CYP27B1,CD44,BCL2,HLX,BCL6,AGRN,NDUFS3,SERTAD1,CRIM1,SERTAD2,EBAG9,SOCS2,SOCS3,SOCS1,CSDA,SOD1,OSM,VEGFB,PRKCQ,CDKN1A,BTG1,LRP12,ADAM17,HBEGF,DCUN1D3,PARP1,C6ORF108	1073	341	13123	1.54222	1	0.151358	8.49843
GO:0043627~response to estrogen stimulus	18	1.28205	0.00482897	PDGFB,PTGS2,SOCS2,SOCS3,STRN3,SOCS1,ARNT2,RCAN1,CTNNB1,MAPK1,CCNE1,CYP27B1,DUSP1,HMOX1,BCL2,IL1B,RARA,SERPINA1	1073	105	13123	2.0966	1	0.150744	8.53685
GO:0043123~positive regulation of I-kappaB kinase/NF-kappaB cascade	17	1.21083	0.00511408	CARD9,LTBR,LITAF,SLC20A1,FKBP1A,PIM2,CD40,BIRC2,TRAF3IP2,TNFSF10,ATP2C1,HMOX1,RIPK2,IL1B,RHOC,HTR2B,TRAF5	1073	97	13123	2.14344	1	0.157606	9.01867
GO:0044092~negative regulation of molecular function	42	2.99145	0.00532581	PSMB10,ADCY3,ADCY7,ADORA2A,FKBP1A,EGLN1,CDC16,TRIB1,SPRY2,GPX1,CYP27B1,HMOX1,SPRED2,IL1B,CAT,NQO1,CDK5RAP1,GCHFR,DNAJA3,ANGPTL4,IRAK2,ANAPC1,GPS1,IRAK1,ANAPC5,OPRL1,PIF1,SMAD6,ANAPC4,PIM1,NLRP3,PSMB8,CDKN1A,DUSP2,PSMA6,GLA,ID1,CALM3,GADD45B,GADD45A,CALM2,DNAJB6,DUSP6	1073	333	13123	1.54255	1	0.162247	9.37495
GO:0032642~regulation of chemokine production	6	0.42735	0.0054049	IL6,HIF1A,HMOX1,ADAM17,IL1B,RIPK2	1073	15	13123	4.89208	1	0.163123	9.5077
GO:0043370~regulation of CD4-positive, alpha beta T cell differentiation	6	0.42735	0.0054049	CD83,GIMAP5,CD80,HLX,RARA,BCL6	1073	15	13123	4.89208	1	0.163123	9.5077
GO:0045786~negative regulation of cell cycle	15	1.06838	0.00559893	BMP2,AURKAIP1,SIPA1,ZBTB17,ATM,CDKN1A,TSPYL2,ETS1,BCL2,BTG3,PPP1R13B,BCL6,MAD2L2,DCUN1D3,CDK5RAP1	1073	81	13123	2.26485	1	0.167124	9.83258
GO:0045859~regulation of protein kinase activity	43	3.06268	0.00589169	ADCY3,PDGFB,ADCY7,ADORA2A,EDN1,FPR1,SDC4,CAMKK2,TRIB1,SPRY2,APP,TSPYL2,CDKN2B,SPRED2,TGFA,IL1B,PAK1,PPAP2A,CDK5RAP1,SERTAD1,DNAJA3,SYK,GPS1,IRAK1,MAP2K1,SPHK2,MAP2K3,PICK1,PIM1,SOD1,PPP1CB,CDC25B,SPAG9,PROK2,CDKN1A,DUSP2,EREG,ADAM17,LRP8,GADD45B,GADD45A,DUSP6,VLDLR	1073	345	13123	1.52434	1	0.173692	10.3207
GO:0016311~dephosphorylation	23	1.63818	0.00600298	PTPN6,PTPRF,PTPN2,SSH3,SSH2,DUSP23,ACP5,PPP1CC,PPP1CB,PTPRO,PTPN12,CDC25B,DUSP5,PPM1F,PPM1G,PPP1CA,DUSP2,DUSP1,BCL2,PTPLA,PTPN1,PPAP2A,DUSP6	1073	152	13123	1.85062	1	0.175292	10.5056
GO:0034341~response to interferon-gamma	5	0.356125	0.00622962	CIITA,KYNU,CYP27B1,DNAJA3,GCH1	1073	10	13123	6.1151	1	0.179889	10.881
GO:0006457~protein folding	25	1.78063	0.00624674	GRPEL1,WFS1,FKBP4,FKBP1A,DNAJB12,HLA-DMA,PIN1,TOR3A,SH3GLB1,BAG3,HSPE1,ERO1L,DNAJA4,DNAJA3,HSP90AA1,TBCE,NKTR,TRAP1,DNAJB9,C19ORF2,FKBP15,HSPD1,DNAJB1,DNAJB6,DNAJB5	1073	171	13123	1.78804	1	0.178955	10.9093
GO:0042592~homeostatic process	81	5.76923	0.00635562	SLC9A9,GNA15,AQP9,WFS1,GPR109B,GPR109A,EDN1,SLC7A8,BNIP3,TERF2IP,FOXO3,VGF,MBP,CTNNB1,CKB,GPX1,APP,DKC1,HAMP,HMOX1,SERPINE1,IL1B,IL1A,EIF2B4,MT3,IRS2,PROK2,HIF1A,ADM,ATP2C1,NAB2,TXN,VEGFA,TXNRD2,TXNRD1,PRNP,PMP22,CCL1,TNFRSF6B,KCNMB3,CCL3,GLRX5,MCL1,ADORA2A,SLC37A4,ACP5,PRKDC,EGLN1,FKBP1A,ABCA1,GCLM,TIMP1,GCKR,CCL23,CYP27B1,SLC30A1,BCL2,BCL6,SCARB1,QSOX2,MT1H,APEX1,DNAJA3,ERCC2,GLRX,MAFG,SEPW1,IL…	1073	744	13123	1.33151	1	0.1804	11.0891
GO:0043549~regulation of kinase activity	44	3.1339	0.00639101	ADCY3,PDGFB,ADCY7,ADORA2A,EDN1,FPR1,SDC4,CAMKK2,TRIB1,SPRY2,APP,TSPYL2,CDKN2B,SPRED2,TGFA,IL1B,PAK1,PPAP2A,CDK5RAP1,SERTAD1,DNAJA3,SYK,GPS1,IRAK1,VAV3,MAP2K1,SPHK2,MAP2K3,PICK1,PIM1,SOD1,PPP1CB,CDC25B,SPAG9,PROK2,CDKN1A,DUSP2,EREG,ADAM17,LRP8,GADD45B,GADD45A,DUSP6,VLDLR	1073	357	13123	1.50736	1	0.179944	11.1474
GO:0051098~regulation of binding	23	1.63818	0.0064869	IRAK2,IRAK1,IL6,PIM1,TLR2,FKBP1A,EGLN1,NLRP3,TRIB1,PRKCQ,ID1,HMOX1,BCL2,HIPK2,PYCARD,CALM3,RIPK2,BCL3,IL1B,CAT,APEX1,CALM2,DNAJA3,ERCC2	1073	153	13123	1.83853	1	0.181028	11.3053
GO:0006007~glucose catabolic process	12	0.854701	0.00660379	GPI,LDHA,TPI1,PGAM4,PKM2,PGM1,PGD,PGAM1,PFKP,PGK1,GAPDH,HIBADH	1073	58	13123	2.53039	1	0.182618	11.4975
GO:0033273~response to vitamin	13	0.925926	0.00660825	MUC1,SCAMP3,BMP2,KYNU,PTGS2,IGFBP7,CCNE1,CYP27B1,CD44,DUSP1,BCL2,IL1B,RARA	1073	66	13123	2.40898	1	0.181388	11.5048
GO:0050670~regulation of lymphocyte proliferation	15	1.06838	0.00697766	IL6,IL2RA,CD40,PRKCQ,CDKN1A,CD80,CD274,RIPK2,IL1B,BCL6,INPP5D,IL13RA1,DNAJA3,EBI3,SYK	1073	83	13123	2.21028	1	0.189147	12.1095
GO:0001944~vasculature development	33	2.35043	0.0073357	LMO2,TNFRSF12A,EDN1,TIPARP,WASF2,TNFSF12,CTNNB1,GPX1,ARHGAP22,PTK2,CD44,HEY1,HMOX1,ITGAV,IL1B,ZC3H12A,TGFA,PPAP2B,ANGPTL4,SPHK2,IL8,PDPN,MMP19,ARHGAP24,NCL,GPI,PROK2,HIF1A,EREG,ID1,LAMA5,VEGFA,PLAU	1073	250	13123	1.61439	1	0.19644	12.6919
GO:0032675~regulation of interleukin-6 production	9	0.641026	0.00742271	IL6,CARD9,EREG,TLR2,IL1B,RIPK2,HSPD1,INPP5D,TLR7	1073	36	13123	3.05755	1	0.19712	12.8328
GO:0010035~response to inorganic substance	28	1.9943	0.00750919	KCNMB3,ATP5D,AQP9,PTGS2,UROS,CTNNB1,GPX1,SLC1A3,HMOX1,BCL2,SERPINE1,NDRG1,SERPINA1,CAT,MT1H,FOSL1,MT3,NR4A2,SOD1,MT1X,GART,SOD2,CDKN1A,DUSP1,MTF1,CALM3,TXNRD2,PRNP,CALM2	1073	202	13123	1.69527	1	0.197777	12.9727
GO:0000165~MAPKKK cascade	26	1.85185	0.00751454	WNT5A,FPR1,MAPKAPK2,TRIB1,CAMKK2,RASGRP3,RB1CC1,SPRED2,IL1B,TGFA,PAK1,SYK,GPS1,MAP2K1,ARHGEF6,MAP2K3,SOD1,SHANK3,PROK2,SH2D3C,SPAG9,MAPK1,DUSP2,MAPK7,GADD45B,DUSP6	1073	183	13123	1.73762	1	0.196521	12.9814
GO:0021700~developmental maturation	17	1.21083	0.00759377	CEBPA,PTGS2,PICK1,NR4A2,FOXO3,CTNNB1,CDC25B,BTK,TIMP1,HES1,APP,AGPAT6,EREG,CD44,VEGFA,AGRN,ERCC2	1073	101	13123	2.05855	1	0.197004	13.1093
GO:0032944~regulation of mononuclear cell proliferation	15	1.06838	0.00776176	IL6,IL2RA,CD40,PRKCQ,CDKN1A,CD80,CD274,RIPK2,IL1B,BCL6,INPP5D,IL13RA1,DNAJA3,EBI3,SYK	1073	84	13123	2.18396	1	0.199527	13.3801
GO:0070663~regulation of leukocyte proliferation	15	1.06838	0.00776176	IL6,IL2RA,CD40,PRKCQ,CDKN1A,CD80,CD274,RIPK2,IL1B,BCL6,INPP5D,IL13RA1,DNAJA3,EBI3,SYK	1073	84	13123	2.18396	1	0.199527	13.3801
GO:0006928~cell motion	55	3.91738	0.0080727	CTHRC1,MTSS1,TLN1,PTGS2,IL16,PDGFB,WASF2,TNFSF12,VCL,GPX1,APP,GAB2,CD44,VNN1,IL1B,VNN2,SYK,ARID5B,CCL4L1,CCL4L2,VASP,PLAUR,HIF1A,TNS1,BTG1,TXN,HSPB1,ADAM17,VCAN,CCL3,TNFRSF12A,FPR1,ABI3,PRKDC,FPR3,FPR2,EPHB2,TUBB,PTK2,DOCK2,SCARB1,PPAP2A,PPAP2B,ARHGDIB,IL6,VAV3,MAP2K1,IL8,ANXA1,NR4A2,ETS1,ID1,LAMA5,HBEGF,LRP8,PLAU	1073	475	13123	1.41613	1	0.205258	13.8791
GO:0051338~regulation of transferase activity	45	3.20513	0.00815243	ADCY3,PDGFB,ADCY7,ADORA2A,EDN1,FPR1,SDC4,CAMKK2,TRIB1,SPRY2,APP,TSPYL2,CDKN2B,SPRED2,TGFA,IL1B,PAK1,PPAP2A,CDK5RAP1,SERTAD1,DNAJA3,SYK,GPS1,IRAK1,VAV3,MAP2K1,SPHK2,PIF1,MAP2K3,PICK1,PIM1,SOD1,PPP1CB,CDC25B,SPAG9,PROK2,CDKN1A,DUSP2,EREG,ADAM17,LRP8,GADD45B,GADD45A,DUSP6,VLDLR	1073	372	13123	1.47946	1	0.205671	14.0066
GO:0046165~alcohol biosynthetic process	10	0.712251	0.00817171	PGM3,GPI,TPI1,ATF3,SPHK2,SDS,PGM1,PGD,PMM2,PTAFR	1073	44	13123	2.77959	1	0.204726	14.0374
GO:0001558~regulation of cell growth	27	1.92308	0.0083082	TNFRSF12A,ABTB2,IGFBP7,SIPA1,FGFRL1,OSGIN1,GREM1,ACVR1B,CYP27B1,TSPYL2,CD44,BCL2,BCL6,NDUFS3,CRIM1,SERTAD1,EBAG9,SERTAD2,SOCS2,VEGFB,PRKCQ,CDKN1A,BTG1,ADAM17,HBEGF,DCUN1D3,C6ORF108	1073	194	13123	1.70214	1	0.206398	14.2552
GO:0051240~positive regulation of multicellular organismal process	32	2.2792	0.0086196	PANX1,PTGS2,ADORA2A,EDN1,TLR2,TLR7,SLC1A3,HMOX1,BCL2,PYCARD,IL1B,BCL3,RARA,IL1A,IL6,BMP2,CARD9,GIMAP5,CD40,SOD1,NLRP3,PROK2,CD83,HIF1A,EREG,ADM,F3,ADAM17,RIPK2,ALOX5,HSPD1,BMP6	1073	243	13123	1.61056	1	0.211875	14.7502
GO:0009719~response to endogenous stimulus	48	3.4188	0.0086377	ADCY3,PTGS2,ADCY7,PDGFB,ADORA2A,IGFBP7,ARNT2,UROS,PRKDC,HPRT1,VGF,AK3L1,CTNNB1,CCNE1,CYP27B1,HMOX1,BCL2,IL1B,RARA,SERPINA1,FOSL1,EIF2B4,IRS2,IL6,MAP2K1,SOCS2,MAT2A,PTPN2,SOCS3,STRN3,IL1RN,SOCS1,NR4A2,RCAN1,BIRC2,MAPK1,PRKCQ,CDKN1A,BTG2,DUSP1,ADM,ALDH2,ADAM17,PTPN1,PARP1,ABCC5,MGST1,VLDLR	1073	404	13123	1.45309	1	0.210887	14.7789
GO:0043085~positive regulation of catalytic activity	59	4.20228	0.00883524	ADCY3,GNA15,ADORA3,ADCY7,PDGFB,EDN1,CDC16,SDC4,TGFA,IL1B,PAK1,PLCB2,SYK,ANAPC1,IRAK1,ANAPC5,ANAPC4,PICK1,PIM1,NLRP3,PPP1CB,SPAG9,PROK2,HIF1A,PSMA6,EREG,F3,ADAM17,GADD45B,PSMB10,ADORA2A,FPR1,GCLM,GCH1,PIN1,CYP27B1,BCL2,PYCARD,SCARB1,HSPE1,PPAP2A,DNAJA3,HIP1,NR1H3,VAV3,SPHK2,MAP2K1,MAP2K3,NR4A2,SOD1,PSMB8,CDC25B,P2RY11,GSPT1,LRP8,HSPD1,HTR2B,ABL2,VLDLR	1073	519	13123	1.39033	1	0.21378	15.0914
GO:0006189~'de novo' IMP biosynthetic process	4	0.2849	0.00900758	ATIC,PPAT,PFAS,GART	1073	6	13123	8.15346	1	0.216085	15.3631
GO:0002755~MyD88-dependent toll-like receptor signaling pathway	4	0.2849	0.00900758	IRAK2,IRAK1,TLR2,HSPD1	1073	6	13123	8.15346	1	0.216085	15.3631
GO:0006188~IMP biosynthetic process	4	0.2849	0.00900758	ATIC,PPAT,PFAS,GART	1073	6	13123	8.15346	1	0.216085	15.3631
GO:0046040~IMP metabolic process	4	0.2849	0.00900758	ATIC,PPAT,PFAS,GART	1073	6	13123	8.15346	1	0.216085	15.3631
GO:0001568~blood vessel development	32	2.2792	0.00912774	LMO2,TNFRSF12A,EDN1,TIPARP,WASF2,TNFSF12,CTNNB1,GPX1,ARHGAP22,PTK2,CD44,HEY1,HMOX1,ITGAV,IL1B,ZC3H12A,TGFA,PPAP2B,ANGPTL4,SPHK2,IL8,MMP19,ARHGAP24,NCL,GPI,PROK2,HIF1A,EREG,ID1,LAMA5,VEGFA,PLAU	1073	244	13123	1.60396	1	0.21725	15.5521
GO:0007566~embryo implantation	8	0.569801	0.00913107	PTGS2,IGFBP7,FKBP4,IL1B,SOD1,PCSK5,IL11RA,PLAU	1073	30	13123	3.26139	1	0.215949	15.5573
GO:0045648~positive regulation of erythrocyte differentiation	5	0.356125	0.00916314	ACVR1B,HIF1A,ETS1,FOXO3,INPP5D	1073	11	13123	5.55918	1	0.215264	15.6077
GO:0043372~positive regulation of CD4-positive, alpha beta T cell differentiation	5	0.356125	0.00916314	CD83,GIMAP5,CD80,HLX,RARA	1073	11	13123	5.55918	1	0.215264	15.6077
GO:0019221~cytokine-mediated signaling pathway	13	0.925926	0.00944853	IRAK2,CEBPA,IRAK1,IL6,SOCS1,FKBP1A,STAT4,EREG,CLCF1,PYCARD,IL1B,LRP8,IL1A	1073	69	13123	2.30424	1	0.219822	16.0547
GO:0043433~negative regulation of transcription factor activity	10	0.712251	0.00949327	IRAK2,IRAK1,ID1,HMOX1,PIM1,EGLN1,CAT,NLRP3,DNAJA3,TRIB1	1073	45	13123	2.71782	1	0.219383	16.1245
GO:0002221~pattern recognition receptor signaling pathway	6	0.42735	0.00971069	IRAK2,IRAK1,TLR2,RIPK2,HSPD1,TLR7	1073	17	13123	4.31654	1	0.222453	16.4633
GO:0032844~regulation of homeostatic process	18	1.28205	0.0100889	GIMAP5,IL2RA,LMO2,GPR109B,PIF1,GPR109A,FKBP1A,TERF2IP,FOXO3,GCLM,ACVR1B,HIF1A,CD44,ETS1,BCL2,VEGFA,CALM3,ADAM17,INPP5D,CALM2	1073	113	13123	1.94817	1	0.228685	17.0495
GO:0006790~sulfur metabolic process	18	1.28205	0.0100889	TPST1,MTHFD2L,GAL3ST4,MAT2A,SOD1,GCLM,SOD2,GPX1,GSTK1,CSGALNACT2,CHST13,SEPP1,CTNS,PAPSS1,EXT1,SMS,PAPSS2,MGST1	1073	113	13123	1.94817	1	0.228685	17.0495
GO:0045767~regulation of anti-apoptosis	9	0.641026	0.0103781	CDKN1A,IL6,DUSP1,BTG2,ADM,HMOX1,SERBP1,TNFAIP8,RARA	1073	38	13123	2.89663	1	0.233032	17.4951
GO:0045089~positive regulation of innate immune response	10	0.712251	0.0109699	IRAK2,IRAK1,CARD9,GIMAP5,EREG,PVRL2,TLR2,RIPK2,HSPD1,TLR7	1073	46	13123	2.65874	1	0.243169	18.3999
GO:0050920~regulation of chemotaxis	8	0.569801	0.0109822	IL6,IL8,IL16,PDGFB,F3,VEGFA,ADAM17,GREM1	1073	31	13123	3.15618	1	0.241978	18.4185
GO:0010564~regulation of cell cycle process	18	1.28205	0.0109837	XPO1,AURKAIP1,SMAD6,EDN1,CDC16,ATM,PIN1,OSM,PRKCQ,EREG,PCBP4,IL1B,TGFA,BCL6,RANBP1,MAD2L2,DCUN1D3,IL1A	1073	114	13123	1.93108	1	0.240596	18.4208
GO:0046365~monosaccharide catabolic process	13	0.925926	0.0118148	LDHA,GNPDA1,PGD,PFKP,PGAM1,HIBADH,GPI,TPI1,PKM2,PGAM4,PGM1,PGK1,GAPDH	1073	71	13123	2.23933	1	0.254871	19.6754
GO:0007346~regulation of mitotic cell cycle	22	1.56695	0.0119753	AURKAIP1,SMAD6,EDN1,PIM3,CDC16,ATM,PIN1,PRKCQ,APP,CDKN2B,EREG,PCBP4,BCL2,BTG3,IL1B,TGFA,CDK10,BCL6,RANBP1,MAD2L2,DCUN1D3,IL1A	1073	152	13123	1.77016	1	0.256393	19.9155
GO:0007610~behavior	53	3.77493	0.0120333	IL16,PTGS2,PDGFB,WFS1,UCHL1,CXCL10,APP,SLC1A3,CCL3L1,CCL3L3,IL1B,SEPP1,FOSL1,SYK,EGR1,CMKLR1,TBCE,CCL4L1,CCL4L2,FOSB,PLAUR,OSM,MAPK1,PROK2,HIPK2,PTAFR,CXCL1,CCL1,CCL3,CXCL5,ADORA2A,CXCL2,FPR1,FPR3,CXCL6,FPR2,HPRT1,EPHB2,DOCK2,CCL23,CCL20,BCL2,ACSL4,MAFG,IL6,MAP2K1,IL8,NR4A2,CCL19,SOD1,SOD2,CMTM8,CMTM7,PLAU,VLDLR	1073	464	13123	1.39698	1	0.256009	20.0021
GO:0042102~positive regulation of T cell proliferation	9	0.641026	0.012146	PRKCQ,IL6,IL2RA,CD80,IL1B,RIPK2,DNAJA3,EBI3,SYK	1073	39	13123	2.82235	1	0.256632	20.1702
GO:0051781~positive regulation of cell division	9	0.641026	0.012146	OSM,VEGFB,PDGFB,EREG,VEGFA,TGFA,IL1B,CAT,IL1A	1073	39	13123	2.82235	1	0.256632	20.1702
GO:0043623~cellular protein complex assembly	23	1.63818	0.0124486	ARL2,XPO1,HSP90AA1,SAMM50,COX10,FKBP4,IPO11,PICK1,FKBP1A,BCS1L,GAS7,NDUFS7,TUBB,PTK2,NDUFS8,MYH11,TUBB6,AGRN,HSPD1,TNPO1,TUBA1B,TUBB3,HIP1	1073	162	13123	1.73639	1	0.260679	20.6197
GO:0009127~purine nucleoside monophosphate biosynthetic process	6	0.42735	0.0125581	ATIC,AMPD3,PPAT,PFAS,IMPDH2,GART	1073	18	13123	4.07673	1	0.261203	20.7819
GO:0009168~purine ribonucleoside monophosphate biosynthetic process	6	0.42735	0.0125581	ATIC,AMPD3,PPAT,PFAS,IMPDH2,GART	1073	18	13123	4.07673	1	0.261203	20.7819
GO:0045646~regulation of erythrocyte differentiation	6	0.42735	0.0125581	ACVR1B,HIF1A,LMO2,ETS1,FOXO3,INPP5D	1073	18	13123	4.07673	1	0.261203	20.7819
GO:0006096~glycolysis	10	0.712251	0.0126122	GPI,LDHA,TPI1,PGAM4,PKM2,PGM1,PGAM1,PFKP,PGK1,GAPDH	1073	47	13123	2.60217	1	0.260732	20.8618
GO:0051302~regulation of cell division	10	0.712251	0.0126122	OSM,VEGFB,PDGFB,EREG,VEGFA,CALM3,TGFA,IL1B,CAT,CALM2,IL1A	1073	47	13123	2.60217	1	0.260732	20.8618
GO:0010604~positive regulation of macromolecule metabolic process	89	6.33903	0.0126285	E2F3,AURKAIP1,PDGFB,WFS1,ARNT2,CDC16,TNFSF12,FOXO3,TLR7,CTNNB1,CAMKK2,CCNE1,APP,CLCF1,HMOX1,IL1B,FAM129A,SUPT5H,FOSL1,IL1A,SERTAD1,EBI3,SERTAD2,SYK,EGR1,CIITA,ANAPC1,IRAK1,IRS2,ANAPC5,STRN3,ANAPC4,CD40,AHR,SCAP,OSM,HES1,MAPK1,HHEX,PRKCQ,NCOA1,HIF1A,PSMA6,MTF1,CD80,EREG,ZMIZ2,HIPK2,VEGFA,ADAM17,MAPRE3,PSMB10,ING5,CSF2,GLIS3,PRKDC,FKBP1A,PIN1,PLAGL1,MRPL12,RB1CC1,BCL2,NFAT5,BCL3,AGRN,DYRK2,RUNX1,DN…	1073	854	13123	1.27458	1	0.259598	20.8859
GO:0046688~response to copper ion	5	0.356125	0.0128682	ATP5D,BCL2,SOD1,PRNP,MT1H	1073	12	13123	5.09591	1	0.262408	21.2392
GO:0022900~electron transport chain	16	1.1396	0.0129794	NDUFB10,NDUFB7,COX10,CYC1,CYB561,SOD2,NDUFS7,SLC1A3,NDUFV1,TXN,NDUFS8,TXNRD1,ERO1L,NDUFS3,STEAP1,GLRX	1073	98	13123	1.99677	1	0.262938	21.4027
GO:0016051~carbohydrate biosynthetic process	17	1.21083	0.0130276	GLT25D1,PGD,UGDH,PMM2,GPI,PGM3,TPI1,ATF3,GBE1,SDS,GFPT2,PGM1,CSGALNACT2,GYS1,CHST13,EXT1,PTAFR	1073	107	13123	1.94312	1	0.262366	21.4733
GO:0045321~leukocyte activation	31	2.20798	0.0133826	CSF2,SBNO2,EDN1,IL21R,TLR2,PRKDC,FKBP1A,HPRT1,HLA-DMA,TLR7,CTNNB1,CD48,DOCK2,CLCF1,BCL2,BCL3,BCL6,NDRG1,IMPDH2,DNAJA3,SYK,EGR1,GIMAP5,IL8,CD40,SLAMF1,CD80,ULBP1,ADAM17,RIPK2,HSPD1	1073	241	13123	1.57318	1	0.267078	21.9924
GO:0046637~regulation of alpha-beta T cell differentiation	7	0.498575	0.0134532	CD83,GIMAP5,CD80,HLX,RARA,BCL6,SYK	1073	25	13123	3.42445	1	0.266873	22.0952
GO:0048545~response to steroid hormone stimulus	26	1.85185	0.0134629	PDGFB,PTGS2,IGFBP7,ARNT2,CTNNB1,CCNE1,CYP27B1,HMOX1,BCL2,IL1B,SERPINA1,RARA,FOSL1,IL6,SOCS2,MAP2K1,SOCS3,STRN3,SOCS1,IL1RN,RCAN1,MAPK1,CDKN1A,ADM,DUSP1,ALDH2	1073	192	13123	1.65617	1	0.265641	22.1094
GO:0046164~alcohol catabolic process	14	0.997151	0.0137154	LDHA,GNPDA1,PGD,PFKP,PGAM1,HIBADH,GPD1L,GPI,TPI1,PKM2,PGAM4,PGM1,PGK1,GAPDH	1073	81	13123	2.11386	1	0.268508	22.476
GO:0030036~actin cytoskeleton organization	29	2.06553	0.0139857	FGD2,CXCL1,MTSS1,TLN1,PDLIM7,PDGFB,SSH2,FERMT2,WASF2,PFN1,PRR5,CDC42EP2,DOCK2,NISCH,BCL2,CNN2,BCL6,TRIP10,FGD3,ARHGDIB,EVL,GAS7,VASP,RND3,ATP2C1,MYH11,NEURL2,ABL2,TMOD1	1073	222	13123	1.59764	1	0.271627	22.8667
GO:0009617~response to bacterium	25	1.78063	0.0140427	PTGS2,TLR2,TRIB1,GCH1,GPX1,CYP27B1,CCL20,HAMP,IL1B,BCL3,SCARB1,SERPINA1,IRAK1,IL6,CARD9,SOCS3,SOCS1,MAPK1,ADM,ADAM17,RIPK2,PTAFR,MGST1,ABCC5,VLDLR	1073	183	13123	1.67079	1	0.271178	22.9489
GO:0006446~regulation of translational initiation	9	0.641026	0.0141254	EIF4B,EIF4G1,EIF2C2,EIF3B,EIF5,DDX1,HSPB1,EIF1B,EIF2B4	1073	40	13123	2.75179	1	0.271157	23.0679
GO:0042108~positive regulation of cytokine biosynthetic process	10	0.712251	0.0144304	PRKCQ,CD80,EREG,HMOX1,IL1B,BCL3,TLR7,EBI3,IL1A,SYK	1073	48	13123	2.54796	1	0.27476	23.5055
GO:0006417~regulation of translation	20	1.4245	0.0145907	NANOS3,METAP1,IL6,EIF2C2,EIF5,DDX1,IGF2BP2,EIF1B,RPS5,EIF4G1,EIF4B,MAPK1,APP,EIF3B,HSPB1,BCL3,FAM129A,MIF4GD,PPP1R15A,EIF2B4	1073	136	13123	1.79856	1	0.275972	23.7345
GO:0032722~positive regulation of chemokine production	4	0.2849	0.0148125	IL6,HIF1A,ADAM17,RIPK2	1073	7	13123	6.98868	1	0.278154	24.0504
GO:0055093~response to hyperoxia	4	0.2849	0.0148125	CDKN1A,PDPN,ALDH2,SOD2	1073	7	13123	6.98868	1	0.278154	24.0504
GO:0031328~positive regulation of cellular biosynthetic process	73	5.19943	0.0149042	E2F3,PDGFB,EDN1,ARNT2,FOXO3,TLR7,CTNNB1,CAMKK2,CCNE1,APP,HMOX1,IL1B,FAM129A,SUPT5H,FOSL1,IL1A,SERTAD1,EBI3,SERTAD2,SYK,EGR1,CIITA,IRAK1,IRS2,HSP90AA1,STRN3,AHR,SCAP,OSM,HES1,MAPK1,HHEX,PRKCQ,NCOA1,HIF1A,MTF1,CD80,EREG,ZMIZ2,HIPK2,VEGFA,MAPRE3,ING5,CSF2,GLIS3,ADORA2A,PRKDC,ABCA1,PLAGL1,MRPL12,NFAT5,BCL3,AGRN,DYRK2,RUNX1,ERCC2,PLAGL2,NR1H3,HNRNPAB,MAF,CEBPA,BMP2,TESC,IL6,MAP2K3,NR4A2,AFF1,SOD2,YWHA…	1073	684	13123	1.30527	1	0.278236	24.1805
GO:0006163~purine nucleotide metabolic process	25	1.78063	0.0149426	ADCY3,ATP5D,ADCY7,ATP1B3,ADORA2A,ATP6AP1,HPRT1,PFAS,PPAT,GCH1,ATIC,PAPSS1,IMPDH2,MTHFD2L,NADK,PDE4D,ATP13A3,AMPD3,GART,ATP6V0E2,ADM,ATP2C1,ATP6V0A1,ATP5A1,CTNS	1073	184	13123	1.66171	1	0.277475	24.235
GO:0009266~response to temperature stimulus	14	0.997151	0.0151204	SOCS3,IGFBP7,CSDA,VGF,SOD1,OSM,PRKCQ,ADM,BCL2,NR2F6,IL1B,HSPB1,ERO1L,EIF2B4	1073	82	13123	2.08808	1	0.278916	24.4867
GO:0032268~regulation of cellular protein metabolic process	53	3.77493	0.0151704	METAP1,EIF2C2,PDGFB,AURKAIP1,EDN1,IDE,EIF5,CDC16,APP,CLCF1,IL1B,PAK1,FAM129A,EIF2B4,SYK,ANAPC1,ANAPC5,SOCS3,ANAPC4,SOCS1,EIF1B,EIF4G1,OSM,MAPK1,PSMA6,CD80,HSPB1,ADAM17,PPP1R15A,PSMB10,CSF2,NANOS3,IGF2BP2,FKBP1A,TIMP1,PIN1,EIF3B,ITGAV,BCL2,RB1CC1,BCL3,DNAJA3,NR1H3,IL6,BMP2,SMAD6,DDX1,RPS5,PSMB8,EIF4B,DNMT1,TNK2,MIF4GD	1073	470	13123	1.37915	1	0.278342	24.5574
GO:0019725~cellular homeostasis	52	3.7037	0.0153778	GNA15,WFS1,EDN1,BNIP3,CKB,MBP,GPX1,APP,HAMP,IL1B,EIF2B4,MT3,PROK2,HIF1A,ADM,ATP2C1,NAB2,TXN,TXNRD2,TXNRD1,PMP22,PRNP,KCNMB3,CCL1,CCL3,GLRX5,MCL1,ADORA2A,FKBP1A,GCLM,GCKR,CCL23,SLC30A1,BCL2,QSOX2,APEX1,MT1H,GLRX,ERCC2,MAFG,SEPW1,GIMAP5,OPRL1,CCL19,FZD2,SOD1,SOD2,KCNN4,CD55,ATP6V0E2,MT2A,RHOT1	1073	460	13123	1.38254	1	0.280219	24.8497
GO:0050871~positive regulation of B cell activation	8	0.569801	0.015475	CDKN1A,IL6,BCL6,TNFSF12,CD40,INPP5D,IL13RA1,SYK	1073	33	13123	2.9649	1	0.280373	24.9863
GO:0002218~activation of innate immune response	6	0.42735	0.015921	IRAK2,IRAK1,TLR2,RIPK2,HSPD1,TLR7	1073	19	13123	3.86217	1	0.285855	25.6103
GO:0002758~innate immune response-activating signal transduction	6	0.42735	0.015921	IRAK2,IRAK1,TLR2,RIPK2,HSPD1,TLR7	1073	19	13123	3.86217	1	0.285855	25.6103
GO:0045787~positive regulation of cell cycle	11	0.783476	0.0160715	APP,EREG,SMAD6,EDN1,PIM1,ADAM17,TGFA,IL1B,PPP1CB,FOSL1,IL1A	1073	57	13123	2.36021	1	0.286781	25.8197
GO:0051353~positive regulation of oxidoreductase activity	7	0.498575	0.0163103	CYP27B1,HIF1A,EDN1,IL1B,SCARB1,ABL2,GCH1	1073	26	13123	3.29274	1	0.289023	26.151
GO:0031100~organ regeneration	7	0.498575	0.0163103	CCNE1,CDKN1A,ADM,SOCS3,ATIC,SOCS1,AXL	1073	26	13123	3.29274	1	0.289023	26.151
GO:0051092~positive regulation of NF-kappaB transcription factor activity	9	0.641026	0.0163296	IRAK2,IRAK1,PRKCQ,IL6,PYCARD,TLR2,IL1B,RIPK2,CAT	1073	41	13123	2.68468	1	0.287961	26.1776
GO:0045926~negative regulation of growth	17	1.21083	0.0166955	ING5,LGMN,SIPA1,OSGIN1,GREM1,ACVR1B,PTK2,CDKN1A,TSPYL2,CYP27B1,BTG1,BCL2,BCL6,NDUFS3,DCUN1D3,SERTAD1,SERTAD2	1073	110	13123	1.89012	1	0.292048	26.6822
GO:0006839~mitochondrial transport	12	0.854701	0.0171866	ATP5D,TSPO,GRPEL1,KIAA1279,HSP90AA1,SLC1A3,GIMAP5,BCL2,TOMM40,SLC25A37,BNIP3,TIMM44	1073	66	13123	2.22367	1	0.297895	27.3542
GO:0009123~nucleoside monophosphate metabolic process	12	0.854701	0.0171866	ADCY3,ADCY7,ADM,ADORA2A,ATIC,PDE4D,AMPD3,C6ORF108,PPAT,PFAS,IMPDH2,GART	1073	66	13123	2.22367	1	0.297895	27.3542
GO:0051084~'de novo' posttranslational protein folding	5	0.356125	0.0174058	TOR3A,SH3GLB1,DNAJB1,ERO1L,HLA-DMA	1073	13	13123	4.70392	1	0.299714	27.6524
GO:0031667~response to nutrient levels	26	1.85185	0.0181246	KYNU,PTGS2,IGFBP7,VARS,CCNE1,CYP27B1,ACSL1,MAP1LC3A,CD44,CDKN2B,HMOX1,BCL2,IL1B,RARA,MUC1,BMP2,SCAMP3,CFB,SOCS3,SOD1,SOD2,DUSP1,ADM,ATG4C,ALOX5,VLDLR	1073	197	13123	1.61414	1	0.308642	28.6218
GO:0009968~negative regulation of signal transduction	28	1.9943	0.0183562	TWSG1,EZH2,GREM1,TRIB1,PIN1,RGS10,RGS12,IL1B,BCL6,INPP5D,DNAJA3,SOCS2,PTPRF,SOCS3,SMAD6,STRN3,SOCS1,CYP26A1,RGS19,RGS16,DDIT4,HHEX,RGS2,HIPK2,TGIF1,PTPN1,TNFAIP3,TOB1	1073	217	13123	1.57809	1	0.310533	28.9315
GO:0022604~regulation of cell morphogenesis	19	1.35328	0.0186324	FGD2,PTPRF,PDPN,TNFRSF12A,FERMT2,CDC42SE1,GAS7,TTC3,MBP,EPHB2,PTK2,CDC42EP2,YWHAH,VEGFA,CYFIP1,SEMA4D,CDC42EP4,NEFM,FGD3	1073	130	13123	1.78749	1	0.313023	29.2992
GO:0009124~nucleoside monophosphate biosynthetic process	10	0.712251	0.0186357	ADCY3,ADCY7,ADM,ADORA2A,ATIC,AMPD3,PPAT,PFAS,IMPDH2,GART	1073	50	13123	2.44604	1	0.311688	29.3036
GO:0015939~pantothenate metabolic process	3	0.213675	0.0189145	VNN1,VNN2,VNN3	1073	3	13123	12.2302	1	0.31418	29.673
GO:0030967~ER-nuclear sterol response pathway	3	0.213675	0.0189145	INSIG2,INSIG1,SCAP	1073	3	13123	12.2302	1	0.31418	29.673
GO:0007584~response to nutrient	20	1.4245	0.0193709	MUC1,KYNU,SCAMP3,BMP2,PTGS2,CFB,IGFBP7,VARS,CCNE1,ACSL1,CYP27B1,DUSP1,CDKN2B,CD44,HMOX1,BCL2,IL1B,RARA,ALOX5,VLDLR	1073	140	13123	1.74717	1	0.319063	30.2736
GO:0033077~T cell differentiation in the thymus	7	0.498575	0.0195598	DOCK2,BCL2,ADAM17,PRKDC,HLA-DMA,DNAJA3,CTNNB1	1073	27	13123	3.17079	1	0.320249	30.5209
GO:0006749~glutathione metabolic process	7	0.498575	0.0195598	GPX1,GSTK1,CTNS,SOD1,GCLM,MGST1,SOD2	1073	27	13123	3.17079	1	0.320249	30.5209
GO:0007010~cytoskeleton organization	48	3.4188	0.0196045	CXCL1,FGD2,MTSS1,TLN1,CCL3,PDLIM7,PDGFB,SIPA1,SSH2,WASF2,FERMT2,CTNNB1,ARHGAP4,PFN1,TUBB,PRR5,CDC42EP2,PTK2,DOCK2,NISCH,BCL2,CNN2,RANBP1,BCL6,MICAL1,PAK1,TRIP10,TUBA1B,FGD3,NEFM,ARHGDIB,TBCE,EVL,MID1,PALLD,SOD1,GAS7,VASP,RND3,LAMA5,ATP2C1,SVIL,MYH11,NEURL2,ABL2,GADD45A,DNAJB6,TMOD1	1073	424	13123	1.38455	1	0.319476	30.5791
GO:0009891~positive regulation of biosynthetic process	73	5.19943	0.0197072	E2F3,PDGFB,EDN1,ARNT2,FOXO3,TLR7,CTNNB1,CAMKK2,CCNE1,APP,HMOX1,IL1B,FAM129A,SUPT5H,FOSL1,IL1A,SERTAD1,EBI3,SERTAD2,SYK,EGR1,CIITA,IRAK1,IRS2,HSP90AA1,STRN3,AHR,SCAP,OSM,HES1,MAPK1,HHEX,PRKCQ,NCOA1,HIF1A,MTF1,CD80,EREG,ZMIZ2,HIPK2,VEGFA,MAPRE3,ING5,CSF2,GLIS3,ADORA2A,PRKDC,ABCA1,PLAGL1,MRPL12,NFAT5,BCL3,AGRN,DYRK2,RUNX1,ERCC2,PLAGL2,NR1H3,HNRNPAB,MAF,CEBPA,BMP2,TESC,IL6,MAP2K3,NR4A2,AFF1,SOD2,YWHA…	1073	693	13123	1.28832	1	0.31949	30.7131
GO:0009126~purine nucleoside monophosphate metabolic process	6	0.42735	0.0198338	ATIC,AMPD3,PPAT,PFAS,IMPDH2,GART	1073	20	13123	3.66906	1	0.319825	30.8779
GO:0046638~positive regulation of alpha-beta T cell differentiation	6	0.42735	0.0198338	CD83,GIMAP5,CD80,HLX,RARA,SYK	1073	20	13123	3.66906	1	0.319825	30.8779
GO:0009167~purine ribonucleoside monophosphate metabolic process	6	0.42735	0.0198338	ATIC,AMPD3,PPAT,PFAS,IMPDH2,GART	1073	20	13123	3.66906	1	0.319825	30.8779
GO:0051090~regulation of transcription factor activity	16	1.1396	0.0198623	IRAK2,IRAK1,IL6,PIM1,TLR2,EGLN1,NLRP3,TRIB1,PRKCQ,ID1,HMOX1,PYCARD,RIPK2,IL1B,CAT,DNAJA3	1073	103	13123	1.89984	1	0.31885	30.9149
GO:0044275~cellular carbohydrate catabolic process	14	0.997151	0.0199979	LDHA,GNPDA1,PGD,PFKP,PGAM1,HIBADH,GPD1L,GPI,TPI1,PKM2,PGAM4,PGM1,PGK1,GAPDH	1073	85	13123	2.01439	1	0.319304	31.0909
GO:0043392~negative regulation of DNA binding	10	0.712251	0.0210426	IRAK2,IRAK1,ID1,HMOX1,PIM1,EGLN1,CAT,NLRP3,DNAJA3,TRIB1	1073	51	13123	2.39808	1	0.33161	32.4326
GO:0006984~ER-nuclear signaling pathway	8	0.569801	0.0211379	INSIG2,WFS1,INSIG1,ERO1L,PAK1,EIF2AK2,PPP1R15A,SCAP	1073	35	13123	2.79547	1	0.331469	32.5537
GO:0048514~blood vessel morphogenesis	27	1.92308	0.0215511	TNFRSF12A,EDN1,TIPARP,WASF2,TNFSF12,CTNNB1,GPX1,ARHGAP22,PTK2,HEY1,HMOX1,IL1B,ZC3H12A,TGFA,ANGPTL4,IL8,MMP19,ARHGAP24,NCL,PROK2,GPI,HIF1A,EREG,LAMA5,ID1,VEGFA,PLAU	1073	210	13123	1.57245	1	0.335391	33.0766
GO:0033032~regulation of myeloid cell apoptosis	4	0.2849	0.0222771	CD44,BCL2,GPR109B,GPR109A,ADAM17	1073	8	13123	6.1151	1	0.343184	33.9861
GO:0051173~positive regulation of nitrogen compound metabolic process	68	4.8433	0.02241	E2F3,PDGFB,EDN1,ARNT2,TNFSF12,FOXO3,CTNNB1,CAMKK2,CCNE1,APP,IL1B,SUPT5H,FOSL1,SERTAD1,SERTAD2,EGR1,CIITA,IRAK1,HSP90AA1,STRN3,CD40,AHR,SCAP,OSM,HES1,MAPK1,HHEX,NCOA1,HIF1A,MTF1,CD80,EREG,ZMIZ2,HIPK2,VEGFA,MAPRE3,ING5,CSF2,GLIS3,ADORA2A,PRKDC,ABCA1,HPRT1,PLAGL1,MRPL12,NFAT5,BCL3,AGRN,RUNX1,PLAGL2,NR1H3,HNRNPAB,ERCC2,MAF,CEBPA,TESC,IL6,BMP2,MAP2K1,MAP2K3,NR4A2,AFF1,SOD2,YWHAH,ETS1,ETS2,EBF1,BMP6	1073	643	13123	1.2934	1	0.343461	34.1512
GO:0033674~positive regulation of kinase activity	29	2.06553	0.0226627	ADCY3,ADCY7,PDGFB,ADORA2A,EDN1,FPR1,SDC4,IL1B,TGFA,PAK1,PPAP2A,SYK,IRAK1,VAV3,MAP2K1,SPHK2,MAP2K3,PICK1,PIM1,SOD1,PPP1CB,CDC25B,PROK2,SPAG9,EREG,ADAM17,LRP8,GADD45B,VLDLR	1073	231	13123	1.53539	1	0.34522	34.4643
GO:0009110~vitamin biosynthetic process	7	0.498575	0.0232233	NAMPT,KYNU,PDXK,CYP27B1,DHRS9,PNPO,NAPRT1	1073	28	13123	3.05755	1	0.350729	35.1538
GO:0019320~hexose catabolic process	12	0.854701	0.0233778	GPI,LDHA,TPI1,PGAM4,PKM2,PGM1,PGD,PGAM1,PFKP,PGK1,GAPDH,HIBADH	1073	69	13123	2.12699	1	0.351227	35.3427
GO:0006518~peptide metabolic process	10	0.712251	0.0236653	MRPS35,GPX1,GSTK1,IDE,CTNS,SOD1,PCSK5,GCLM,MGST1,SOD2	1073	52	13123	2.35196	1	0.353324	35.6926
GO:0051099~positive regulation of binding	13	0.925926	0.0237845	IRAK2,IRAK1,IL6,TLR2,FKBP1A,PRKCQ,HIPK2,PYCARD,RIPK2,IL1B,CALM3,CAT,CALM2,ERCC2	1073	78	13123	2.03837	1	0.353379	35.8373
GO:0048589~developmental growth	14	0.997151	0.0238493	PTGS2,TBCE,FOXO3,PLAUR,NOTCH3,GPX1,PRKCQ,CCNE1,APP,EREG,BCL2,SERPINE1,CYFIP1,PLAU	1073	87	13123	1.96808	1	0.352784	35.9157
GO:0042440~pigment metabolic process	9	0.641026	0.0244167	TSPO,COX10,HMOX1,BCL2,HMBS,UROS,HPRT1,PPAT,GART	1073	44	13123	2.50163	1	0.358152	36.599
GO:0001775~cell activation	34	2.42165	0.0250851	CSF2,SBNO2,ADORA2A,IL21R,EDN1,TLR2,PRKDC,FKBP1A,HPRT1,TLR7,HLA-DMA,CTNNB1,CD48,DOCK2,CLCF1,BCL2,BCL3,BCL6,NDRG1,IMPDH2,DNAJA3,SYK,EGR1,IL6,GIMAP5,IL8,CD40,SLAMF1,PLSCR1,CD80,ULBP1,ADAM17,RIPK2,HSPD1	1073	284	13123	1.46418	1	0.364602	37.3948
GO:0007599~hemostasis	16	1.1396	0.0251484	IL6,ADORA2A,EFEMP2,CD40,ANXA5,PLAUR,GPI,PLSCR1,CD36,F3,KIAA1715,SERPINE1,TFPI,SERPINA1,PAPSS2,PLAU	1073	106	13123	1.84607	1	0.363957	37.4698
GO:0045860~positive regulation of protein kinase activity	28	1.9943	0.0251977	ADCY3,ADCY7,PDGFB,ADORA2A,EDN1,FPR1,SDC4,IL1B,TGFA,PAK1,PPAP2A,SYK,IRAK1,SPHK2,MAP2K1,MAP2K3,PICK1,PIM1,SOD1,PPP1CB,CDC25B,PROK2,SPAG9,EREG,ADAM17,LRP8,GADD45B,VLDLR	1073	223	13123	1.53563	1	0.363155	37.5281
GO:0043388~positive regulation of DNA binding	12	0.854701	0.0257637	IRAK2,IRAK1,IL6,TLR2,PRKCQ,HIPK2,PYCARD,RIPK2,IL1B,CALM3,CAT,CALM2,ERCC2	1073	70	13123	2.0966	1	0.368281	38.1934
GO:0008360~regulation of cell shape	10	0.712251	0.0265127	FGD2,CDC42EP2,PDPN,VEGFA,FERMT2,CDC42SE1,CYFIP1,CDC42EP4,GAS7,FGD3	1073	53	13123	2.30758	1	0.375381	39.0634
GO:0001889~liver development	10	0.712251	0.0265127	CEBPA,HES1,CCNE1,HHEX,JARID2,HLX,RB1CC1,ALDH2,SOD2,CTNNB1	1073	53	13123	2.30758	1	0.375381	39.0634
GO:0009165~nucleotide biosynthetic process	24	1.7094	0.026601	ATP5D,ADCY3,NAMPT,KYNU,MTHFD2L,ADCY7,ATP1B3,ADORA2A,ATP6AP1,ATP13A3,HPRT1,AMPD3,PPAT,PFAS,GART,ATP6V0E2,ADM,ATP2C1,ATIC,ATP6V0A1,ATP5A1,PAPSS1,IMPDH2,NAPRT1	1073	184	13123	1.59524	1	0.374989	39.1652
GO:0050921~positive regulation of chemotaxis	7	0.498575	0.02732	IL6,IL8,IL16,PDGFB,F3,VEGFA,ADAM17	1073	29	13123	2.95212	1	0.381594	39.9883
GO:0032101~regulation of response to external stimulus	21	1.49573	0.0274255	SBNO2,IL6,IL2RA,PDGFB,IL16,IL8,PTGS2,ADORA2A,PDPN,EDN1,GREM1,OSM,GPX1,TNFRSF1B,CYP27B1,F3,VEGFA,SERPINE1,ADAM17,BCL6,PLAU	1073	155	13123	1.65699	1	0.38137	40.1082
GO:0043086~negative regulation of catalytic activity	33	2.35043	0.0277037	PSMB10,ADCY3,ADCY7,ADORA2A,FKBP1A,CDC16,TRIB1,GPX1,SPRY2,CYP27B1,SPRED2,IL1B,CDK5RAP1,NQO1,GCHFR,DNAJA3,ANGPTL4,ANAPC1,GPS1,ANAPC5,OPRL1,PIF1,SMAD6,ANAPC4,PSMB8,CDKN1A,DUSP2,PSMA6,GLA,GADD45B,GADD45A,DNAJB6,DUSP6	1073	276	13123	1.46231	1	0.383035	40.4232
GO:0046364~monosaccharide biosynthetic process	8	0.569801	0.0280979	PGM3,GPI,TPI1,ATF3,SDS,PGM1,PGD,PMM2	1073	37	13123	2.64437	1	0.385935	40.8668
GO:0031401~positive regulation of protein modification process	24	1.7094	0.028122	PSMB10,ANAPC1,CSF2,IL6,BMP2,ANAPC5,ANAPC4,FKBP1A,CDC16,PSMB8,PIN1,OSM,PSMA6,CD80,CLCF1,RB1CC1,BCL2,DNMT1,IL1B,ADAM17,TNK2,FAM129A,DNAJA3,SYK	1073	185	13123	1.58662	1	0.38482	40.8939
GO:0015837~amine transport	17	1.21083	0.0283152	ARL2,SLC36A1,SLC44A1,AQP9,PDPN,SLC16A10,PICK1,SLC7A8,SLC7A5,SLC7A6,SLC7A11,NISCH,SLC1A3,SLC6A6,SERPINB7,CTNS,SYK	1073	117	13123	1.77704	1	0.385529	41.1102
GO:0006164~purine nucleotide biosynthetic process	20	1.4245	0.0287034	ATP5D,ADCY3,MTHFD2L,ADCY7,ATP1B3,ADORA2A,ATP6AP1,ATP13A3,HPRT1,AMPD3,PFAS,PPAT,GART,ATP6V0E2,ADM,ATP2C1,ATIC,ATP6V0A1,ATP5A1,IMPDH2	1073	146	13123	1.67537	1	0.388306	41.5424
GO:0046627~negative regulation of insulin receptor signaling pathway	5	0.356125	0.0291585	PTPRF,SOCS3,SOCS1,IL1B,PTPN1	1073	15	13123	4.07673	1	0.391752	42.0452
GO:0001938~positive regulation of endothelial cell proliferation	5	0.356125	0.0291585	HIF1A,PDGFB,F3,VEGFA,TNFSF12	1073	15	13123	4.07673	1	0.391752	42.0452
GO:0016052~carbohydrate catabolic process	16	1.1396	0.0292137	LDHA,GNPDA1,PGD,PGAM1,PFKP,CHI3L2,FUCA1,HIBADH,GPD1L,GPI,TPI1,PGAM4,PKM2,PGM1,PGK1,GAPDH	1073	108	13123	1.81188	1	0.390968	42.1059
GO:0010557~positive regulation of macromolecule biosynthetic process	68	4.8433	0.0292564	E2F3,PDGFB,ARNT2,FOXO3,TLR7,CTNNB1,CAMKK2,CCNE1,APP,HMOX1,IL1B,FAM129A,SUPT5H,FOSL1,IL1A,SERTAD1,EBI3,SERTAD2,SYK,EGR1,CIITA,IRAK1,IRS2,STRN3,AHR,SCAP,OSM,HES1,MAPK1,PRKCQ,HHEX,NCOA1,HIF1A,MTF1,CD80,EREG,ZMIZ2,HIPK2,VEGFA,MAPRE3,ING5,CSF2,GLIS3,PRKDC,PLAGL1,MRPL12,NFAT5,BCL3,AGRN,DYRK2,RUNX1,ERCC2,PLAGL2,NR1H3,HNRNPAB,MAF,CEBPA,TESC,IL6,BMP2,MAP2K3,NR4A2,AFF1,YWHAH,ETS1,ETS2,EBF1,BMP6	1073	652	13123	1.27554	1	0.390059	42.1528
GO:0045088~regulation of innate immune response	10	0.712251	0.0295935	IRAK2,IRAK1,CARD9,GIMAP5,EREG,PVRL2,TLR2,RIPK2,HSPD1,TLR7	1073	54	13123	2.26485	1	0.392221	42.5221
GO:0030029~actin filament-based process	29	2.06553	0.0304675	FGD2,CXCL1,MTSS1,TLN1,PDLIM7,PDGFB,SSH2,FERMT2,WASF2,PFN1,PRR5,CDC42EP2,DOCK2,NISCH,BCL2,CNN2,BCL6,TRIP10,FGD3,ARHGDIB,EVL,GAS7,VASP,RND3,ATP2C1,MYH11,NEURL2,ABL2,TMOD1	1073	237	13123	1.49652	1	0.399865	43.4689
GO:0010243~response to organic nitrogen	11	0.783476	0.0306466	CCNE1,CDKN1A,PTGS2,BTG2,ADORA2A,NR4A2,UROS,HPRT1,BIRC2,AK3L1,MGST1	1073	63	13123	2.13543	1	0.40033	43.661
GO:0046641~positive regulation of alpha-beta T cell proliferation	4	0.2849	0.0314186	CD80,RIPK2,EBI3,SYK	1073	9	13123	5.43564	1	0.406759	44.4824
GO:0030858~positive regulation of epithelial cell differentiation	4	0.2849	0.0314186	CYP27B1,CDKN2B,BTG1,CTNNB1	1073	9	13123	5.43564	1	0.406759	44.4824
GO:0010574~regulation of vascular endothelial growth factor production	4	0.2849	0.0314186	IL6,HIF1A,IL1B,IL1A	1073	9	13123	5.43564	1	0.406759	44.4824
GO:0032663~regulation of interleukin-2 production	7	0.498575	0.0318672	CD83,PRKCQ,CARD9,CD80,IL1B,RIPK2,IL1A	1073	30	13123	2.85371	1	0.409868	44.9546
GO:0032649~regulation of interferon-gamma production	7	0.498575	0.0318672	GIMAP5,BCL3,RIPK2,RARA,HSPD1,TLR7,EBI3	1073	30	13123	2.85371	1	0.409868	44.9546
GO:0050878~regulation of body fluid levels	19	1.35328	0.0319632	IL6,ADORA2A,WFS1,EFEMP2,EDN1,CD40,ANXA5,PLAUR,KCNN4,GPI,PLSCR1,CD36,F3,KIAA1715,SERPINE1,TFPI,SERPINA1,PAPSS2,PLAU	1073	138	13123	1.68387	1	0.409458	45.0551
GO:0007596~blood coagulation	15	1.06838	0.0323646	IL6,ADORA2A,EFEMP2,CD40,ANXA5,PLAUR,PLSCR1,CD36,F3,KIAA1715,SERPINE1,TFPI,SERPINA1,PAPSS2,PLAU	1073	100	13123	1.83453	1	0.412053	45.4736
GO:0050817~coagulation	15	1.06838	0.0323646	IL6,ADORA2A,EFEMP2,CD40,ANXA5,PLAUR,PLSCR1,CD36,F3,KIAA1715,SERPINE1,TFPI,SERPINA1,PAPSS2,PLAU	1073	100	13123	1.83453	1	0.412053	45.4736
GO:0002822~regulation of adaptive immune response based on somatic recombination of immune receptors built from immunoglobulin superfamily domains	10	0.712251	0.032916	GIMAP5,CD80,HLX,PVRL2,IL1B,RARA,BCL6,TNFSF12,HSPD1,CD40	1073	55	13123	2.22367	1	0.416075	46.0435
GO:0015980~energy derivation by oxidation of organic compounds	18	1.28205	0.033393	NDUFB10,NDUFB7,COX10,IDH3B,PPP1CC,PPP1CB,SOD2,NDUFS7,PPP1CA,GBE1,SLC1A3,NDUFV1,NDUFS8,GFPT2,GYS1,IDH2,CAT,NDUFS3	1073	129	13123	1.70654	1	0.419322	46.532
GO:0031668~cellular response to extracellular stimulus	11	0.783476	0.0337664	ASGR1,CCNE1,CDKN1A,LDHA,ATG4C,CDKN2B,MAP1LC3A,HMOX1,NR4A2,AXL,FOSL1	1073	64	13123	2.10206	1	0.421538	46.9114
GO:0031349~positive regulation of defense response	12	0.854701	0.0339731	OSM,IRAK2,IRAK1,IL6,CARD9,GIMAP5,EREG,PVRL2,TLR2,RIPK2,HSPD1,TLR7	1073	73	13123	2.01044	1	0.422148	47.1204
GO:0006690~icosanoid metabolic process	9	0.641026	0.034957	AKR1C3,AKR1C2,PTGR1,PTGS2,PDPN,EDN1,LTA4H,ALOX5,SYK	1073	47	13123	2.34195	1	0.43005	48.1045
GO:0051347~positive regulation of transferase activity	29	2.06553	0.0350696	ADCY3,ADCY7,PDGFB,ADORA2A,EDN1,FPR1,SDC4,IL1B,TGFA,PAK1,PPAP2A,SYK,IRAK1,VAV3,MAP2K1,SPHK2,MAP2K3,PICK1,PIM1,SOD1,PPP1CB,CDC25B,PROK2,SPAG9,EREG,ADAM17,LRP8,GADD45B,VLDLR	1073	240	13123	1.47782	1	0.429738	48.216
GO:0010332~response to gamma radiation	6	0.42735	0.0351478	GPX1,SOCS3,BCL2,PRKDC,DCUN1D3,SOD2	1073	23	13123	3.19049	1	0.42911	48.2933
GO:0009156~ribonucleoside monophosphate biosynthetic process	6	0.42735	0.0351478	ATIC,AMPD3,PPAT,PFAS,IMPDH2,GART	1073	23	13123	3.19049	1	0.42911	48.2933
GO:0048878~chemical homeostasis	54	3.84615	0.035476	SLC9A9,GNA15,AQP9,WFS1,EDN1,SLC7A8,BNIP3,FOXO3,VGF,CKB,MBP,APP,HAMP,HMOX1,SERPINE1,IL1B,EIF2B4,MT3,IRS2,PROK2,HIF1A,ADM,ATP2C1,NAB2,VEGFA,PMP22,PRNP,KCNMB3,CCL1,CCL3,ADORA2A,SLC37A4,FKBP1A,EGLN1,ABCA1,GCLM,GCKR,CCL23,CYP27B1,SLC30A1,BCL2,SCARB1,MT1H,ERCC2,MAFG,GIMAP5,OPRL1,CCL19,FZD2,SOD1,SOD2,CD55,ATP6V0E2,MT2A	1073	506	13123	1.3052	1	0.430793	48.6166
GO:0032933~SREBP-mediated signaling pathway	3	0.213675	0.0357871	INSIG2,INSIG1,SCAP	1073	4	13123	9.17265	1	0.432302	48.9213
GO:0001547~antral ovarian follicle growth	3	0.213675	0.0357871	CCNE1,EREG,FOXO3	1073	4	13123	9.17265	1	0.432302	48.9213
GO:0006991~response to sterol depletion	3	0.213675	0.0357871	INSIG2,INSIG1,SCAP	1073	4	13123	9.17265	1	0.432302	48.9213
GO:0030308~negative regulation of cell growth	14	0.997151	0.0358431	SIPA1,OSGIN1,GREM1,ACVR1B,CDKN1A,CYP27B1,TSPYL2,BTG1,BCL2,BCL6,NDUFS3,DCUN1D3,SERTAD1,SERTAD2	1073	92	13123	1.86112	1	0.431472	48.9759
GO:0032088~negative regulation of NF-kappaB transcription factor activity	5	0.356125	0.0364312	IRAK2,IRAK1,CAT,NLRP3,DNAJA3	1073	16	13123	3.82194	1	0.43547	49.5466
GO:0002819~regulation of adaptive immune response	10	0.712251	0.0364878	GIMAP5,CD80,HLX,PVRL2,IL1B,RARA,BCL6,TNFSF12,HSPD1,CD40	1073	56	13123	2.18396	1	0.434644	49.6012
GO:0007088~regulation of mitosis	10	0.712251	0.0364878	AURKAIP1,EREG,EDN1,TGFA,IL1B,CDC16,MAD2L2,ATM,IL1A,PIN1	1073	56	13123	2.18396	1	0.434644	49.6012
GO:0051783~regulation of nuclear division	10	0.712251	0.0364878	AURKAIP1,EREG,EDN1,TGFA,IL1B,CDC16,MAD2L2,ATM,IL1A,PIN1	1073	56	13123	2.18396	1	0.434644	49.6012
GO:0002764~immune response-regulating signal transduction	10	0.712251	0.0364878	IRAK2,IRAK1,MAPK1,TLR2,RIPK2,CACNB3,HSPD1,CD40,TLR7,SYK	1073	56	13123	2.18396	1	0.434644	49.6012
GO:0051247~positive regulation of protein metabolic process	29	2.06553	0.0367148	PSMB10,CSF2,AURKAIP1,WFS1,FKBP1A,CDC16,PIN1,CLCF1,BCL2,RB1CC1,IL1B,BCL3,FAM129A,DNAJA3,SYK,NR1H3,ANAPC1,IL6,BMP2,ANAPC5,ANAPC4,PSMB8,OSM,MAPK1,PSMA6,CD80,ADAM17,DNMT1,TNK2	1073	241	13123	1.47168	1	0.435352	49.8196
GO:0048661~positive regulation of smooth muscle cell proliferation	7	0.498575	0.0368796	IL6,PTGS2,PDGFB,EREG,VEGFA,EDN1,HBEGF	1073	31	13123	2.76166	1	0.4355	49.9777
GO:0030217~T cell differentiation	11	0.783476	0.0371014	EGR1,DOCK2,GIMAP5,BCL2,ADAM17,PRKDC,BCL3,HLA-DMA,DNAJA3,CTNNB1,SYK	1073	65	13123	2.06973	1	0.436153	50.1896
GO:0032270~positive regulation of cellular protein metabolic process	28	1.9943	0.0372065	PSMB10,CSF2,AURKAIP1,FKBP1A,CDC16,PIN1,CLCF1,BCL2,RB1CC1,IL1B,BCL3,FAM129A,DNAJA3,SYK,NR1H3,ANAPC1,IL6,BMP2,ANAPC5,ANAPC4,PSMB8,OSM,MAPK1,PSMA6,CD80,ADAM17,DNMT1,TNK2	1073	231	13123	1.48245	1	0.435768	50.2897
GO:0034654~nucleobase, nucleoside, nucleotide and nucleic acid biosynthetic process	24	1.7094	0.0386749	ATP5D,ADCY3,NAMPT,KYNU,MTHFD2L,ADCY7,ATP1B3,ADORA2A,ATP6AP1,ATP13A3,HPRT1,AMPD3,PPAT,PFAS,GART,ATP6V0E2,ADM,ATP2C1,ATIC,ATP6V0A1,ATP5A1,PAPSS1,IMPDH2,NAPRT1	1073	191	13123	1.53678	1	0.447287	51.6689
GO:0034404~nucleobase, nucleoside and nucleotide biosynthetic process	24	1.7094	0.0386749	ATP5D,ADCY3,NAMPT,KYNU,MTHFD2L,ADCY7,ATP1B3,ADORA2A,ATP6AP1,ATP13A3,HPRT1,AMPD3,PPAT,PFAS,GART,ATP6V0E2,ADM,ATP2C1,ATIC,ATP6V0A1,ATP5A1,PAPSS1,IMPDH2,NAPRT1	1073	191	13123	1.53678	1	0.447287	51.6689
GO:0006909~phagocytosis	9	0.641026	0.0390624	CORO1C,CD36,ICAM5,ADORA2A,ITGAV,CDC42SE1,SCARB1,ABCA1,MERTK	1073	48	13123	2.29316	1	0.449298	52.0267
GO:0007050~cell cycle arrest	15	1.06838	0.0402719	IL8,WDR6,SESN1,GAS7,VASH1,SESN3,PLAGL1,PPM1G,CDKN1A,CYP27B1,CDKN2B,PCBP4,HBP1,GADD45A,PPP1R15A	1073	103	13123	1.7811	1	0.458248	53.1277
GO:0051341~regulation of oxidoreductase activity	8	0.569801	0.0412023	CYP27B1,HIF1A,GLA,EDN1,IL1B,SCARB1,ABL2,GCH1	1073	40	13123	2.44604	1	0.464685	53.9583
GO:0006769~nicotinamide metabolic process	8	0.569801	0.0412023	NAMPT,TPI1,KYNU,PGD,IDH3B,NADK,HIBADH,NAPRT1	1073	40	13123	2.44604	1	0.464685	53.9583
GO:0046496~nicotinamide nucleotide metabolic process	8	0.569801	0.0412023	NAMPT,TPI1,KYNU,PGD,IDH3B,NADK,HIBADH,NAPRT1	1073	40	13123	2.44604	1	0.464685	53.9583
GO:0001541~ovarian follicle development	8	0.569801	0.0412023	CCNE1,EREG,BCL2,VEGFA,FOXO3,SOD1,VGF,EIF2B4	1073	40	13123	2.44604	1	0.464685	53.9583
GO:0050873~brown fat cell differentiation	6	0.42735	0.0415116	CEBPA,LAMB3,RGS2,LRG1,BNIP3,ERO1L	1073	24	13123	3.05755	1	0.465907	54.2314
GO:0010648~negative regulation of cell communication	29	2.06553	0.0419992	TWSG1,PTGS2,EZH2,GREM1,TRIB1,PIN1,RGS10,RGS12,IL1B,BCL6,INPP5D,DNAJA3,SOCS2,PTPRF,SOCS3,STRN3,SMAD6,SOCS1,CYP26A1,RGS19,RGS16,DDIT4,HHEX,RGS2,HIPK2,TGIF1,PTPN1,TNFAIP3,TOB1	1073	244	13123	1.45359	1	0.468574	54.6587
GO:0045622~regulation of T-helper cell differentiation	4	0.2849	0.0422139	CD80,HLX,RARA,BCL6	1073	10	13123	4.89208	1	0.468994	54.8456
GO:0006595~polyamine metabolic process	4	0.2849	0.0422139	ODC1,SRM,SMOX,SMS	1073	10	13123	4.89208	1	0.468994	54.8456
GO:0051085~chaperone mediated protein folding requiring cofactor	4	0.2849	0.0422139	TOR3A,DNAJB1,ERO1L,HLA-DMA	1073	10	13123	4.89208	1	0.468994	54.8456
GO:0014074~response to purine	4	0.2849	0.0422139	CCNE1,ADORA2A,BCL2,FKBP1A	1073	10	13123	4.89208	1	0.468994	54.8456
GO:0051881~regulation of mitochondrial membrane potential	4	0.2849	0.0422139	ADORA2A,BCL2,SOD1,SOD2	1073	10	13123	4.89208	1	0.468994	54.8456
GO:0001936~regulation of endothelial cell proliferation	7	0.498575	0.0423694	HIF1A,PDGFB,F3,VEGFA,TNFSF12,ATP5A1,VASH1	1073	32	13123	2.67536	1	0.468931	54.9805
GO:0016477~cell migration	32	2.2792	0.0432828	CTHRC1,PDGFB,IL16,TNFRSF12A,WASF2,PRKDC,TNFSF12,GPX1,DOCK2,PTK2,GAB2,CD44,IL1B,SCARB1,PPAP2A,PPAP2B,SYK,IL6,VAV3,IL8,ARID5B,NR4A2,HIF1A,TNS1,ID1,LAMA5,BTG1,ADAM17,HBEGF,LRP8,VCAN,PLAU	1073	276	13123	1.41799	1	0.474958	55.7656
GO:0033365~protein localization in organelle	19	1.35328	0.043283	FYB,XPO1,GRPEL1,TSPO,ATP6AP1,IPO11,TOMM40,TIMM44,RAB3IP,MAPK1,GCKR,BCL3,BCL6,TNPO1,SEC61A1,SRGN,RERE,SEC61G,TOB1	1073	143	13123	1.62499	1	0.473637	55.7657
GO:0016310~phosphorylation	78	5.55556	0.0440681	ATP5D,COX10,ATP6AP1,CLK1,PRKX,BTK,CAMKK2,NDUFS7,ACVR1B,APP,MAP3K8,NDUFS8,EEF2K,TGFA,IL1B,CDK10,PAK1,NDUFS3,CSK,SYK,IRAK2,IRAK1,NDUFB10,LIMK2,PICK1,PIM1,PRKCH,PIM3,PIM2,STK4,OSM,MAST3,MAPK1,SPAG9,PROK2,PRKCQ,MAPK6,RIOK3,HIPK2,RIPK2,MAPK7,EIF2AK2,GADD45B,NDUFB7,CAMK2G,ABI3,MAPKAPK3,FPR1,PRKDC,MAPKAPK2,BRSK1,TRIB1,EPHB2,GALK1,PTK2,STAT4,BCL2,DYRK2,CSF1R,FYB,BMP2,MAP2K1,PDK3,MAP2K3,AXL,NADK,SOD1,ATM,…	1073	779	13123	1.22459	1	0.478542	56.4301
GO:0050708~regulation of protein secretion	10	0.712251	0.0444066	KCNN4,PRKCQ,IL6,PANX1,ADORA2A,PYCARD,CD40,NLRP3,SRGN,IL1A	1073	58	13123	2.10865	1	0.479883	56.7137
GO:0042327~positive regulation of phosphorylation	14	0.997151	0.0448283	CSF2,BMP2,IL6,OSM,CD80,EREG,CLCF1,RB1CC1,BCL2,IL1B,ADAM17,TNK2,FAM129A,SYK	1073	95	13123	1.80234	1	0.481857	57.0645
GO:0009820~alkaloid metabolic process	8	0.569801	0.0463231	NAMPT,TPI1,KYNU,PGD,IDH3B,NADK,HIBADH,NAPRT1	1073	41	13123	2.38638	1	0.492035	58.2864
GO:0050714~positive regulation of protein secretion	8	0.569801	0.0463231	KCNN4,PRKCQ,IL6,PANX1,ADORA2A,PYCARD,NLRP3,IL1A	1073	41	13123	2.38638	1	0.492035	58.2864
GO:0030097~hemopoiesis	28	1.9943	0.0466335	CSF2,TWSG1,TM7SF4,LMO2,TIPARP,PRKDC,HLA-DMA,CTNNB1,TIMP1,DOCK2,CLCF1,BCL2,BCL3,BCL6,RUNX1,DNAJA3,ERCC2,SYK,EGR1,CEBPA,GIMAP5,IFI16,SOD2,DNASE2,PGM3,VEGFA,IRF8,ADAM17	1073	236	13123	1.45104	1	0.493067	58.5359
GO:0051348~negative regulation of transferase activity	14	0.997151	0.0481439	GPS1,ADORA2A,PIF1,TRIB1,SPRY2,CDKN1A,DUSP2,SPRED2,IL1B,GADD45B,CDK5RAP1,GADD45A,DNAJA3,DUSP6	1073	96	13123	1.78357	1	0.503044	59.7303
GO:0022904~respiratory electron transport chain	9	0.641026	0.0482093	NDUFS7,SLC1A3,NDUFB10,NDUFB7,COX10,NDUFV1,NDUFS8,NDUFS3,SOD2	1073	50	13123	2.20144	1	0.502204	59.7813
GO:0043524~negative regulation of neuron apoptosis	9	0.641026	0.0482093	ADORA2A,WFS1,BCL2,HIPK2,NR4A2,ITSN1,SOD1,GCLM,SOD2	1073	50	13123	2.20144	1	0.502204	59.7813
GO:0008630~DNA damage response, signal transduction resulting in induction of apoptosis	7	0.498575	0.0483459	PCBP4,HMOX1,HIPK2,BCL3,DYRK2,IFI16,ATM	1073	33	13123	2.59428	1	0.501894	59.8875
GO:0000060~protein import into nucleus, translocation	7	0.498575	0.0483459	MAPK1,GCKR,ATP6AP1,BCL3,BCL6,TNPO1,TOB1	1073	33	13123	2.59428	1	0.501894	59.8875
GO:0045639~positive regulation of myeloid cell differentiation	7	0.498575	0.0483459	ACVR1B,TESC,HIF1A,ETS1,FOXO3,INPP5D,RUNX1	1073	33	13123	2.59428	1	0.501894	59.8875
GO:0045669~positive regulation of osteoblast differentiation	6	0.42735	0.0485263	IL6,BMP2,PDLIM7,JUND,CTNNB1,BMP6	1073	25	13123	2.93525	1	0.501907	60.0275
GO:0010948~negative regulation of cell cycle process	6	0.42735	0.0485263	OSM,AURKAIP1,BCL6,DCUN1D3,MAD2L2,ATM	1073	25	13123	2.93525	1	0.501907	60.0275
GO:0032768~regulation of monooxygenase activity	6	0.42735	0.0485263	CYP27B1,HIF1A,GLA,IL1B,SCARB1,GCH1	1073	25	13123	2.93525	1	0.501907	60.0275
GO:0009161~ribonucleoside monophosphate metabolic process	6	0.42735	0.0485263	ATIC,AMPD3,PPAT,PFAS,IMPDH2,GART	1073	25	13123	2.93525	1	0.501907	60.0275
GO:0051100~negative regulation of binding	10	0.712251	0.0487658	IRAK2,IRAK1,ID1,HMOX1,PIM1,EGLN1,CAT,NLRP3,DNAJA3,TRIB1	1073	59	13123	2.07291	1	0.502352	60.2126
GO:0009411~response to UV	10	0.712251	0.0487658	GPX1,CDKN1A,BCL2,CASP7,BCL3,BRSK1,CAT,DCUN1D3,TUBB3,ERCC2	1073	59	13123	2.07291	1	0.502352	60.2126
GO:0008361~regulation of cell size	25	1.78063	0.0488603	PDGFB,TNFRSF12A,EDN1,SIPA1,OSGIN1,GREM1,ACVR1B,APP,CYP27B1,TSPYL2,BCL2,RB1CC1,BCL6,NDUFS3,SERTAD1,SERTAD2,CSRP2,CDKN1A,ATP6V0E2,BTG1,ADAM17,CYFIP1,HBEGF,DCUN1D3,C6ORF108	1073	206	13123	1.48425	1	0.501739	60.2854
GO:0001934~positive regulation of protein amino acid phosphorylation	13	0.925926	0.0499162	CSF2,BMP2,IL6,OSM,CD80,CLCF1,RB1CC1,BCL2,IL1B,ADAM17,TNK2,FAM129A,SYK	1073	87	13123	1.8275	1	0.508071	61.0903
GO:0043193~positive regulation of gene-specific transcription	13	0.925926	0.0499162	CEBPA,IL6,TESC,PRKDC,SCAP,CTNNB1,HES1,HHEX,HIF1A,ETS1,MAPRE3,NR1H3,HNRNPAB	1073	87	13123	1.8275	1	0.508071	61.0903
GO:0006469~negative regulation of protein kinase activity	13	0.925926	0.0499162	GPS1,ADORA2A,TRIB1,SPRY2,CDKN1A,DUSP2,SPRED2,IL1B,GADD45B,CDK5RAP1,GADD45A,DNAJA3,DUSP6	1073	87	13123	1.8275	1	0.508071	61.0903
GO:0043281~regulation of caspase activity	12	0.854701	0.0514799	GPX1,GSPT1,ADORA2A,F3,SMAD6,PYCARD,HSPE1,HSPD1,NLRP3,DNAJA3,DNAJB6,HIP1	1073	78	13123	1.88157	1	0.517859	62.254
GO:0051384~response to glucocorticoid stimulus	12	0.854701	0.0514799	CCNE1,CDKN1A,IL6,PTGS2,DUSP1,MAP2K1,ADM,IGFBP7,BCL2,IL1RN,IL1B,FOSL1	1073	78	13123	1.88157	1	0.517859	62.254
GO:0019362~pyridine nucleotide metabolic process	8	0.569801	0.0518335	NAMPT,TPI1,KYNU,PGD,IDH3B,NADK,HIBADH,NAPRT1	1073	42	13123	2.32956	1	0.519027	62.5126
GO:0046651~lymphocyte proliferation	8	0.569801	0.0518335	DOCK2,BCL2,RIPK2,FKBP1A,HSPD1,CD40,HPRT1,IMPDH2	1073	42	13123	2.32956	1	0.519027	62.5126
GO:0048534~hemopoietic or lymphoid organ development	30	2.13675	0.0531	CSF2,TWSG1,TM7SF4,LMO2,TIPARP,PRKDC,HLA-DMA,TIMP1,CTNNB1,DOCK2,CLCF1,BCL2,BCL3,BCL6,RUNX1,DNAJA3,ERCC2,SYK,CEBPA,EGR1,GIMAP5,JARID2,IFI16,SOD1,SOD2,DNASE2,PGM3,VEGFA,IRF8,ADAM17	1073	260	13123	1.41118	1	0.526478	63.425
GO:0033559~unsaturated fatty acid metabolic process	9	0.641026	0.0532635	AKR1C3,AKR1C2,PTGR1,PTGS2,PDPN,EDN1,LTA4H,ALOX5,SYK	1073	51	13123	2.15827	1	0.526293	63.5412
GO:0009725~response to hormone stimulus	40	2.849	0.0534573	ADCY3,PTGS2,ADCY7,PDGFB,IGFBP7,ARNT2,PRKDC,VGF,CTNNB1,CCNE1,CYP27B1,HMOX1,BCL2,IL1B,RARA,SERPINA1,FOSL1,EIF2B4,IRS2,IL6,MAP2K1,SOCS2,MAT2A,PTPN2,SOCS3,STRN3,IL1RN,SOCS1,RCAN1,MAPK1,PRKCQ,CDKN1A,BTG2,DUSP1,ADM,ALDH2,PTPN1,PARP1,ABCC5,VLDLR	1073	366	13123	1.33663	1	0.526316	63.6786
GO:0034622~cellular macromolecular complex assembly	35	2.49288	0.0536975	XPO1,HIST2H2AA3,SAMM50,COX10,FKBP4,SNRPD2,FKBP1A,NAP1L4,NDUFS7,PTK2,TUBB,TSPYL2,HIST2H2AC,NDUFS8,TUBB6,H2AFY,AGRN,GEMIN6,TNPO1,TUBA1B,GEMIN4,TUBB3,HIP1,ARL2,HSP90AA1,IPO11,PICK1,DDX1,BCS1L,GAS7,SF3A3,H2AFY2,RPS15,MYH11,HSPD1	1073	313	13123	1.36759	1	0.526653	63.8481
GO:0002504~antigen processing and presentation of peptide or polysaccharide antigen via MHC class II	5	0.356125	0.0538228	IFI30,HLA-DPB1,HLA-DMB,HLA-DOA,HLA-DMA	1073	18	13123	3.39728	1	0.526212	63.9363
GO:0043154~negative regulation of caspase activity	5	0.356125	0.0538228	GPX1,ADORA2A,SMAD6,DNAJA3,DNAJB6	1073	18	13123	3.39728	1	0.526212	63.9363
GO:0010038~response to metal ion	17	1.21083	0.0540719	ATP5D,KCNMB3,AQP9,PTGS2,SOD1,MT1X,CTNNB1,GPX1,DUSP1,MTF1,BCL2,CALM3,TXNRD2,SERPINA1,NDRG1,PRNP,MT1H,CALM2	1073	127	13123	1.63711	1	0.526607	64.1108
GO:0046649~lymphocyte activation	24	1.7094	0.0543957	EGR1,GIMAP5,IL21R,PRKDC,FKBP1A,CD40,HPRT1,HLA-DMA,SLAMF1,CTNNB1,CD48,DOCK2,CD80,CLCF1,ULBP1,BCL2,ADAM17,RIPK2,BCL3,BCL6,HSPD1,DNAJA3,IMPDH2,SYK	1073	198	13123	1.48245	1	0.527501	64.3366
GO:0031663~lipopolysaccharide-mediated signaling pathway	4	0.2849	0.0546079	IRAK2,IRAK1,MAPK1,RIPK2	1073	11	13123	4.44734	1	0.527643	64.4839
GO:0010885~regulation of cholesterol storage	4	0.2849	0.0546079	CD36,SCARB1,ABCA1,NR1H3	1073	11	13123	4.44734	1	0.527643	64.4839
GO:0000305~response to oxygen radical	4	0.2849	0.0546079	TXNRD2,SOD1,SOD2,MT3	1073	11	13123	4.44734	1	0.527643	64.4839
GO:0009650~UV protection	4	0.2849	0.0546079	GPX1,CAT,TUBB3,ERCC2	1073	11	13123	4.44734	1	0.527643	64.4839
GO:0048520~positive regulation of behavior	7	0.498575	0.054816	IL6,IL8,IL16,PDGFB,F3,VEGFA,ADAM17	1073	34	13123	2.51798	1	0.527757	64.6277
GO:0010562~positive regulation of phosphorus metabolic process	14	0.997151	0.0552748	CSF2,BMP2,IL6,OSM,CD80,EREG,CLCF1,RB1CC1,BCL2,IL1B,ADAM17,TNK2,FAM129A,SYK	1073	98	13123	1.74717	1	0.529529	64.9429
GO:0045937~positive regulation of phosphate metabolic process	14	0.997151	0.0552748	CSF2,BMP2,IL6,OSM,CD80,EREG,CLCF1,RB1CC1,BCL2,IL1B,ADAM17,TNK2,FAM129A,SYK	1073	98	13123	1.74717	1	0.529529	64.9429
GO:0019748~secondary metabolic process	12	0.854701	0.0555956	NAMPT,TPI1,KYNU,ATN1,BCL2,PGD,DHRS9,IDH3B,CYP26A1,NADK,HIBADH,NAPRT1	1073	79	13123	1.85775	1	0.530377	65.1617
GO:0032364~oxygen homeostasis	3	0.213675	0.056449	HIF1A,EGLN1,SOD2	1073	5	13123	7.33812	1	0.534688	65.7375
GO:0045741~positive regulation of epidermal growth factor receptor activity	3	0.213675	0.056449	EREG,ADAM17,TGFA	1073	5	13123	7.33812	1	0.534688	65.7375
GO:0042026~protein refolding	3	0.213675	0.056449	HSP90AA1,FKBP1A,HSPD1	1073	5	13123	7.33812	1	0.534688	65.7375
GO:0002246~healing during inflammatory response	3	0.213675	0.056449	HIF1A,CD44,HMOX1	1073	5	13123	7.33812	1	0.534688	65.7375
GO:0043523~regulation of neuron apoptosis	13	0.925926	0.0576673	PTPRF,WFS1,ADORA2A,NR4A2,SOD1,ITSN1,GCLM,ATM,SOD2,GPX1,BCL2,HIPK2,NQO1	1073	89	13123	1.78643	1	0.541271	66.5439
GO:0045667~regulation of osteoblast differentiation	8	0.569801	0.0577388	TWSG1,IL6,BMP2,PDLIM7,JUND,TOB1,CTNNB1,BMP6	1073	43	13123	2.27539	1	0.540467	66.5907
GO:0040013~negative regulation of locomotion	10	0.712251	0.0583089	NISCH,PDGFB,ADORA2A,CLIC4,HMOX1,BCL2,GREM1,VASH1,TRIB1,VCL	1073	61	13123	2.00495	1	0.54283	66.9613
GO:0009636~response to toxin	10	0.712251	0.0583089	GPX1,CDKN1A,PTGR1,CES1,BCL2,NR4A2,SLC7A8,NQO1,MT1H,SLC7A11	1073	61	13123	2.00495	1	0.54283	66.9613
GO:0050866~negative regulation of cell activation	10	0.712251	0.0583089	GIMAP5,IL2RA,PDGFB,ADORA2A,HMOX1,HLX,CD274,BCL6,INPP5D,PAG1	1073	61	13123	2.00495	1	0.54283	66.9613
GO:0002757~immune response-activating signal transduction	9	0.641026	0.058645	IRAK2,IRAK1,MAPK1,TLR2,RIPK2,CACNB3,HSPD1,TLR7,SYK	1073	52	13123	2.11676	1	0.543697	67.178
GO:0045792~negative regulation of cell size	14	0.997151	0.0590956	SIPA1,OSGIN1,GREM1,ACVR1B,CDKN1A,CYP27B1,TSPYL2,BTG1,BCL2,BCL6,NDUFS3,DCUN1D3,SERTAD1,SERTAD2	1073	99	13123	1.72952	1	0.545273	67.4665
GO:0045935~positive regulation of nucleobase, nucleoside, nucleotide and nucleic acid metabolic process	63	4.48718	0.0593916	E2F3,PDGFB,ARNT2,TNFSF12,FOXO3,CTNNB1,CAMKK2,CCNE1,APP,SUPT5H,FOSL1,SERTAD1,SERTAD2,CIITA,EGR1,IRAK1,STRN3,CD40,AHR,SCAP,OSM,HES1,MAPK1,HHEX,NCOA1,HIF1A,MTF1,CD80,EREG,ZMIZ2,HIPK2,VEGFA,MAPRE3,ING5,CSF2,GLIS3,ADORA2A,PRKDC,ABCA1,PLAGL1,MRPL12,NFAT5,BCL3,AGRN,RUNX1,PLAGL2,NR1H3,HNRNPAB,ERCC2,CEBPA,MAF,TESC,IL6,BMP2,MAP2K1,MAP2K3,NR4A2,AFF1,YWHAH,ETS1,ETS2,EBF1,BMP6	1073	623	13123	1.23676	1	0.545873	67.6546
GO:0033673~negative regulation of kinase activity	13	0.925926	0.0618287	GPS1,ADORA2A,TRIB1,SPRY2,CDKN1A,DUSP2,SPRED2,IL1B,GADD45B,CDK5RAP1,GADD45A,DNAJA3,DUSP6	1073	90	13123	1.76658	1	0.559559	69.1651
GO:0001932~regulation of protein amino acid phosphorylation	21	1.49573	0.0623097	CSF2,IL6,BMP2,PDGFB,SOCS3,SMAD6,EDN1,SOCS1,FKBP1A,PIN1,OSM,CD80,CLCF1,RB1CC1,BCL2,IL1B,ADAM17,PAK1,TNK2,FAM129A,SYK	1073	170	13123	1.51079	1	0.561202	69.4552
GO:0006461~protein complex assembly	52	3.7037	0.0633875	XPO1,E2F3,COX10,IDE,ATL3,HLA-DMA,SLC7A6,CTNNB1,NDUFS7,NDUFS8,TUBB6,CAT,TUBA1B,TUBB3,SYK,ARL2,IRAK1,HSP90AA1,PICK1,PFKP,CD40,NLRP3,SPAG9,PTRF,VAMP8,PRNP,TRAF1,SAMM50,FKBP4,FKBP1A,HPRT1,GCH1,PTK2,TUBB,C1QTNF1,AGRN,TNPO1,GCHFR,HIP1,ANGPTL4,ERCC2,MAP2K1,IPO11,CNKSR3,BCS1L,BIRC3,ANXA5,GAS7,BIRC2,SOD2,MYH11,HSPD1	1073	503	13123	1.26435	1	0.566369	70.096
GO:0070271~protein complex biogenesis	52	3.7037	0.0633875	XPO1,E2F3,COX10,IDE,ATL3,HLA-DMA,SLC7A6,CTNNB1,NDUFS7,NDUFS8,TUBB6,CAT,TUBA1B,TUBB3,SYK,ARL2,IRAK1,HSP90AA1,PICK1,PFKP,CD40,NLRP3,SPAG9,PTRF,VAMP8,PRNP,TRAF1,SAMM50,FKBP4,FKBP1A,HPRT1,GCH1,PTK2,TUBB,C1QTNF1,AGRN,TNPO1,GCHFR,HIP1,ANGPTL4,ERCC2,MAP2K1,IPO11,CNKSR3,BCS1L,BIRC3,ANXA5,GAS7,BIRC2,SOD2,MYH11,HSPD1	1073	503	13123	1.26435	1	0.566369	70.096
GO:0042129~regulation of T cell proliferation	10	0.712251	0.0635005	PRKCQ,IL6,IL2RA,CD80,CD274,IL1B,RIPK2,DNAJA3,EBI3,SYK	1073	62	13123	1.97261	1	0.565793	70.1624
GO:0006693~prostaglandin metabolic process	5	0.356125	0.06393	AKR1C3,AKR1C2,PTGS2,PDPN,EDN1	1073	19	13123	3.21847	1	0.567079	70.4137
GO:0046626~regulation of insulin receptor signaling pathway	5	0.356125	0.06393	PTPRF,SOCS3,SOCS1,IL1B,PTPN1	1073	19	13123	3.21847	1	0.567079	70.4137
GO:0006692~prostanoid metabolic process	5	0.356125	0.06393	AKR1C3,AKR1C2,PTGS2,PDPN,EDN1	1073	19	13123	3.21847	1	0.567079	70.4137
GO:0045076~regulation of interleukin-2 biosynthetic process	5	0.356125	0.06393	PRKCQ,CARD9,CD80,IL1B,IL1A	1073	19	13123	3.21847	1	0.567079	70.4137
GO:0032943~mononuclear cell proliferation	8	0.569801	0.064043	DOCK2,BCL2,RIPK2,FKBP1A,HSPD1,CD40,HPRT1,IMPDH2	1073	44	13123	2.22367	1	0.566506	70.4794
GO:0070661~leukocyte proliferation	8	0.569801	0.064043	DOCK2,BCL2,RIPK2,FKBP1A,HSPD1,CD40,HPRT1,IMPDH2	1073	44	13123	2.22367	1	0.566506	70.4794
GO:0052548~regulation of endopeptidase activity	12	0.854701	0.0644695	GPX1,GSPT1,ADORA2A,F3,SMAD6,PYCARD,HSPE1,HSPD1,NLRP3,DNAJA3,DNAJB6,HIP1	1073	81	13123	1.81188	1	0.567762	70.7264
GO:0045428~regulation of nitric oxide biosynthetic process	6	0.42735	0.0645233	HSP90AA1,GIMAP5,GLA,EDN1,IL1B,SOD2	1073	27	13123	2.71782	1	0.566848	70.7574
GO:0002520~immune system development	31	2.20798	0.0655264	CSF2,TWSG1,TM7SF4,LMO2,TIPARP,PRKDC,HLA-DMA,TIMP1,CTNNB1,DOCK2,CLCF1,BCL2,BCL3,BCL6,RUNX1,DNAJA3,ERCC2,SYK,CEBPA,EGR1,GIMAP5,JARID2,IFI16,SOD1,SOD2,DNASE2,PGM3,VEGFA,IRF8,ADAM17,HSPD1	1073	276	13123	1.37368	1	0.571414	71.3301
GO:0051241~negative regulation of multicellular organismal process	20	1.4245	0.0662463	CIITA,IL6,GIMAP5,PDGFB,PTGS2,LGMN,EDN1,SOD1,ANXA5,CD83,ADM,HMOX1,VEGFA,SERPINE1,ADAM17,RARA,BCL6,INPP5D,SRGN,PLAU	1073	161	13123	1.51928	1	0.574301	71.7346
GO:0048584~positive regulation of response to stimulus	27	1.92308	0.066676	PDGFB,IL16,TLR2,CACNB3,HLA-DMA,TLR7,CYP27B1,PVRL2,IL1B,SYK,IRAK2,IRAK1,IL6,GIMAP5,CARD9,IL8,CFB,OSM,MAPK1,CD55,EREG,F3,HIPK2,VEGFA,ADAM17,RIPK2,HSPD1	1073	234	13123	1.41118	1	0.575517	71.9734
GO:0043405~regulation of MAP kinase activity	18	1.28205	0.067531	GPS1,MAP2K1,PDGFB,MAP2K3,EDN1,FPR1,SOD1,TRIB1,SPAG9,SPRY2,PROK2,DUSP2,SPRED2,IL1B,TGFA,PAK1,SYK,DUSP6	1073	141	13123	1.5613	1	0.579104	72.4429
GO:0034621~cellular macromolecular complex subunit organization	38	2.70655	0.0678319	XPO1,HIST2H2AA3,SAMM50,COX10,FKBP4,SNRPD2,FKBP1A,NAP1L4,NDUFS7,PTK2,TUBB,TSPYL2,HIST2H2AC,NDUFS8,TUBB6,H2AFY,AGRN,GEMIN6,TNPO1,TUBA1B,GEMIN4,TUBB3,HIP1,ARL2,HSP90AA1,IPO11,PICK1,DDX1,BCS1L,EVL,GAS7,TTF2,SF3A3,PTRF,H2AFY2,RPS15,MYH11,HSPD1	1073	352	13123	1.32031	1	0.579569	72.6064
GO:0002521~leukocyte differentiation	17	1.21083	0.0679001	CEBPA,EGR1,CSF2,TM7SF4,GIMAP5,PRKDC,IFI16,HLA-DMA,CTNNB1,DOCK2,CLCF1,BCL2,BCL3,ADAM17,BCL6,DNAJA3,SYK	1073	131	13123	1.58712	1	0.57874	72.6433
GO:0001776~leukocyte homeostasis	7	0.498575	0.069251	IL6,GIMAP5,IL2RA,BCL2,GPR109B,GPR109A,SOD1,DNAJA3	1073	36	13123	2.37809	1	0.584979	73.365
GO:0007422~peripheral nervous system development	7	0.498575	0.069251	OSM,ASCL2,NAB2,TBCE,PMP22,SOD1,ALDH3A2	1073	36	13123	2.37809	1	0.584979	73.365
GO:0008629~induction of apoptosis by intracellular signals	9	0.641026	0.0704034	GPX1,CDKN1A,PCBP4,HMOX1,HIPK2,BCL3,DYRK2,IFI16,ATM	1073	54	13123	2.03837	1	0.590027	73.9664
GO:0042398~cellular amino acid derivative biosynthetic process	9	0.641026	0.0704034	ODC1,SLC1A3,SRM,MAT2A,ASMTL,NR4A2,SMS,GCLM,GCH1	1073	54	13123	2.03837	1	0.590027	73.9664
GO:0040007~growth	22	1.56695	0.0706949	BMP2,PDGFB,PTGS2,ARID5B,TBCE,FOXO3,CSRP2,PLAUR,NOTCH3,CCNE1,GPX1,PRKCQ,APP,ATP6V0E2,EREG,BCL2,SERPINE1,CYFIP1,SEPP1,PLAU,BMP6,ERCC2	1073	183	13123	1.4703	1	0.590393	74.1165
GO:0002252~immune effector process	17	1.21083	0.0716966	IL6,CARD9,CFB,PRKDC,BNIP3,NLRP3,HLA-DMA,TLR7,TRAF3IP2,CD55,TUBB,BCL2,BNIP3L,BCL3,ADAM17,HSPD1,INPP5D	1073	132	13123	1.5751	1	0.594538	74.626
GO:0010970~microtubule-based transport	6	0.42735	0.0735015	APP,KIF1B,MAP2K1,UCHL1,RHOT1,NEFM	1073	28	13123	2.62076	1	0.602804	75.5202
GO:0045833~negative regulation of lipid metabolic process	6	0.42735	0.0735015	GIMAP5,PDGFB,GPR109B,GPR109A,IL1B,SOD1,SCAP	1073	28	13123	2.62076	1	0.602804	75.5202
GO:0045333~cellular respiration	12	0.854701	0.0742161	NDUFS7,SLC1A3,NDUFB10,NDUFB7,COX10,NDUFV1,NDUFS8,IDH2,IDH3B,CAT,NDUFS3,SOD2	1073	83	13123	1.76822	1	0.6053	75.8659
GO:0006119~oxidative phosphorylation	12	0.854701	0.0742161	ATP5D,NDUFS7,ATP6V0E2,NDUFB10,NDUFB7,COX10,ATP6AP1,NDUFV1,NDUFS8,ATP6V0A1,ATP5A1,NDUFS3	1073	83	13123	1.76822	1	0.6053	75.8659
GO:0048678~response to axon injury	5	0.356125	0.074954	MAP2K1,BCL2,VCAN,SOD1,SOD2	1073	20	13123	3.05755	1	0.607886	76.2181
GO:0032570~response to progesterone stimulus	5	0.356125	0.074954	CCNE1,SOCS3,SOCS1,ALDH2,FOSL1	1073	20	13123	3.05755	1	0.607886	76.2181
GO:0002685~regulation of leukocyte migration	5	0.356125	0.074954	IL6,HMOX1,VEGFA,ADAM17,GREM1	1073	20	13123	3.05755	1	0.607886	76.2181
GO:0045664~regulation of neuron differentiation	17	1.21083	0.0756317	PTPRF,TNFRSF12A,TIMP2,TTC3,MBP,EPHB2,NOTCH3,HES1,PTK2,YWHAH,ATN1,BCL2,TGIF1,CDK5RAP2,SEMA4D,CDK5RAP1,NEFM	1073	133	13123	1.56326	1	0.610137	76.5372
GO:0009408~response to heat	9	0.641026	0.0767842	OSM,PRKCQ,SOCS3,IGFBP7,BCL2,HSPB1,IL1B,SOD1,EIF2B4	1073	55	13123	2.0013	1	0.614736	77.0706
GO:0043603~cellular amide metabolic process	9	0.641026	0.0767842	CEBPA,NAMPT,TPI1,KYNU,PGD,IDH3B,NADK,HIBADH,NAPRT1	1073	55	13123	2.0013	1	0.614736	77.0706
GO:0030595~leukocyte chemotaxis	7	0.498575	0.0772161	DOCK2,IL6,IL8,IL16,PDGFB,IL1B,SYK	1073	37	13123	2.31382	1	0.615703	77.2676
GO:0007259~JAK-STAT cascade	7	0.498575	0.0772161	OSM,STAT4,SOCS2,SOCS3,CLCF1,SOCS1,STAT2	1073	37	13123	2.31382	1	0.615703	77.2676
GO:0000302~response to reactive oxygen species	11	0.783476	0.0776141	GPX1,DUSP1,HMOX1,BCL2,SERPINE1,TXNRD2,CAT,SOD1,FOSL1,SOD2,MT3	1073	74	13123	1.818	1	0.616494	77.4476
GO:0050795~regulation of behavior	8	0.569801	0.0778549	IL6,IL8,IL16,PDGFB,F3,VEGFA,ADAM17,GREM1	1073	46	13123	2.12699	1	0.616508	77.5559
GO:0002274~myeloid leukocyte activation	8	0.569801	0.0778549	CD48,CSF2,SBNO2,GIMAP5,IL8,TLR2,NDRG1,TLR7	1073	46	13123	2.12699	1	0.616508	77.5559
GO:0048660~regulation of smooth muscle cell proliferation	8	0.569801	0.0778549	IL6,PTGS2,PDGFB,EREG,VEGFA,EDN1,HBEGF,TRIB1	1073	46	13123	2.12699	1	0.616508	77.5559
GO:0001816~cytokine production	8	0.569801	0.0778549	MAF,IL19,NFAT5,ABCA1,HSPD1,NLRP3,PCSK5,PTAFR	1073	46	13123	2.12699	1	0.616508	77.5559
GO:0032583~regulation of gene-specific transcription	17	1.21083	0.0797065	CIITA,CEBPA,TESC,BMP2,IL6,PRKDC,CTNNB1,SCAP,HES1,HHEX,HIF1A,HEY1,ETS1,BCOR,MAPRE3,NR1H3,HNRNPAB	1073	134	13123	1.55159	1	0.624345	78.3723
GO:0033483~gas homeostasis	3	0.213675	0.0801698	HIF1A,EGLN1,SOD2	1073	6	13123	6.1151	1	0.625402	78.5721
GO:0006072~glycerol-3-phosphate metabolic process	3	0.213675	0.0801698	GPD1L,GK,GK5	1073	6	13123	6.1151	1	0.625402	78.5721
GO:0045624~positive regulation of T-helper cell differentiation	3	0.213675	0.0801698	CD80,HLX,RARA	1073	6	13123	6.1151	1	0.625402	78.5721
GO:0043277~apoptotic cell clearance	3	0.213675	0.0801698	CD36,ITGAV,SCARB1	1073	6	13123	6.1151	1	0.625402	78.5721
GO:0045628~regulation of T-helper 2 cell differentiation	3	0.213675	0.0801698	HLX,RARA,BCL6	1073	6	13123	6.1151	1	0.625402	78.5721
GO:0051188~cofactor biosynthetic process	13	0.925926	0.0804314	NAMPT,MTHFD2L,TSPO,KYNU,PDXK,COX10,HMBS,UROS,GCLM,GCH1,CIAO1,ISCU,NAPRT1	1073	94	13123	1.69141	1	0.62549	78.6842
GO:0048754~branching morphogenesis of a tube	10	0.712251	0.0807865	SPRY2,PPP1CA,BMP2,CD44,LAMA5,BCL2,VEGFA,EDN1,GREM1,CTNNB1	1073	65	13123	1.88157	1	0.626022	78.8354
GO:0065003~macromolecular complex assembly	65	4.62963	0.0812541	HIST2H2AA3,XPO1,E2F3,COX10,ATL3,IDE,SNRPD2,HLA-DMA,NAP1L4,SLC7A6,CTNNB1,NDUFS7,HIST2H2AC,NDUFS8,TUBB6,H2AFY,CAT,TUBA1B,TUBB3,SYK,ARL2,IRAK1,HSP90AA1,PICK1,PFKP,CD40,NLRP3,SPAG9,PTRF,VAMP8,RPS15,PRNP,TRAF1,SAMM50,FKBP4,FKBP1A,ABCA1,HPRT1,GCH1,TUBB,PTK2,TSPYL2,C1QTNF1,AGRN,GEMIN6,TNPO1,GEMIN4,GCHFR,HIP1,ANGPTL4,ERCC2,MAP2K1,CNKSR3,IPO11,DDX1,BCS1L,ANXA5,BIRC3,GAS7,BIRC2,SF3A3,SOD2,H2AFY2,MYH11,HSPD1	1073	658	13123	1.20815	1	0.627082	79.033
GO:0055080~cation homeostasis	31	2.20798	0.0823441	CCL1,SLC9A9,CCL3,GNA15,WFS1,EDN1,SLC7A8,FKBP1A,APP,CYP27B1,CCL23,HAMP,SLC30A1,HMOX1,BCL2,IL1B,MT1H,MT3,MAFG,OPRL1,CCL19,FZD2,SOD1,SOD2,PROK2,CD55,ATP6V0E2,ADM,ATP2C1,MT2A,PRNP	1073	282	13123	1.34445	1	0.631048	79.4869
GO:0009259~ribonucleotide metabolic process	18	1.28205	0.0828393	ATP5D,ATP1B3,ATP6AP1,NADK,ATP13A3,AMPD3,PFAS,PPAT,GART,GCH1,ATP6V0E2,ATP2C1,ATIC,ATP6V0A1,ENTPD4,ATP5A1,CTNS,IMPDH2	1073	145	13123	1.51823	1	0.632204	79.69
GO:0010595~positive regulation of endothelial cell migration	4	0.2849	0.0838557	PDGFB,VEGFA,EDN1,SCARB1	1073	13	13123	3.76314	1	0.635747	80.1009
GO:0032770~positive regulation of monooxygenase activity	4	0.2849	0.0838557	HIF1A,IL1B,SCARB1,GCH1	1073	13	13123	3.76314	1	0.635747	80.1009
GO:0046640~regulation of alpha-beta T cell proliferation	4	0.2849	0.0838557	CD80,RIPK2,EBI3,SYK	1073	13	13123	3.76314	1	0.635747	80.1009
GO:0045086~positive regulation of interleukin-2 biosynthetic process	4	0.2849	0.0838557	PRKCQ,CD80,IL1B,IL1A	1073	13	13123	3.76314	1	0.635747	80.1009
GO:0046777~protein amino acid autophosphorylation	12	0.854701	0.0848489	IRAK1,ACVR1B,PTK2,CAMK2G,PIM1,MAPK7,CLK1,PAK1,EIF2AK2,STK4,CAMKK2,SYK	1073	85	13123	1.72662	1	0.639134	80.4948
GO:0031960~response to corticosteroid stimulus	12	0.854701	0.0848489	CCNE1,CDKN1A,IL6,PTGS2,DUSP1,MAP2K1,ADM,IGFBP7,BCL2,IL1RN,IL1B,FOSL1	1073	85	13123	1.72662	1	0.639134	80.4948
GO:0052547~regulation of peptidase activity	12	0.854701	0.0848489	GPX1,GSPT1,ADORA2A,F3,SMAD6,PYCARD,HSPE1,HSPD1,NLRP3,DNAJA3,DNAJB6,HIP1	1073	85	13123	1.72662	1	0.639134	80.4948
GO:0018212~peptidyl-tyrosine modification	8	0.569801	0.085362	OSM,TPST1,ABI3,CLK1,ABL2,EPHB2,BTK,SYK	1073	47	13123	2.08174	1	0.640316	80.6955
GO:0046148~pigment biosynthetic process	7	0.498575	0.0856756	TSPO,COX10,HMBS,UROS,HPRT1,PPAT,GART	1073	38	13123	2.25293	1	0.640593	80.8171
GO:0050818~regulation of coagulation	7	0.498575	0.0856756	PDGFB,PDPN,F3,EDN1,SERPINE1,ANXA5,PLAU	1073	38	13123	2.25293	1	0.640593	80.8171
GO:0030514~negative regulation of BMP signaling pathway	5	0.356125	0.0868664	TWSG1,SMAD6,HIPK2,GREM1,TOB1	1073	21	13123	2.91195	1	0.644775	81.2725
GO:0042168~heme metabolic process	5	0.356125	0.0868664	TSPO,COX10,HMOX1,HMBS,UROS	1073	21	13123	2.91195	1	0.644775	81.2725
GO:0010466~negative regulation of peptidase activity	5	0.356125	0.0868664	GPX1,ADORA2A,SMAD6,DNAJA3,DNAJB6	1073	21	13123	2.91195	1	0.644775	81.2725
GO:0000086~G2/M transition of mitotic cell cycle	5	0.356125	0.0868664	CDKN1A,CDKN2B,ANAPC5,ANAPC4,GADD45A	1073	21	13123	2.91195	1	0.644775	81.2725
GO:0010883~regulation of lipid storage	5	0.356125	0.0868664	CD36,ITGAV,SCARB1,ABCA1,NR1H3	1073	21	13123	2.91195	1	0.644775	81.2725
GO:0046058~cAMP metabolic process	5	0.356125	0.0868664	ADCY3,ADCY7,ADM,ADORA2A,PDE4D	1073	21	13123	2.91195	1	0.644775	81.2725
GO:0033554~cellular response to stress	56	3.9886	0.087017	MRPS35,WFS1,ZMAT3,INTS3,FOXO3,TERF2IP,GPX1,MAP1LC3A,INSIG2,PCBP4,HMOX1,INSIG1,CAT,FAM129A,EIF2B4,SYK,MT3,DDB1,ARHGEF6,POLB,IFI16,PPP1CB,EEPD1,SCAP,MAPK1,SH2D3C,HIF1A,BTG2,ATG4C,ADM,HIPK2,VCAN,EIF2AK2,GADD45A,PPP1R15A,TNFRSF6B,WNT5A,C17ORF70,PRKDC,BRSK1,SESN1,TRIB1,BCL2,RB1CC1,BCL3,BCL6,DYRK2,ERO1L,APEX1,ERCC2,GPS1,SOD1,ATM,SOD2,CDKN1A,PARP1	1073	560	13123	1.22302	1	0.644316	81.3293
GO:0050801~ion homeostasis	42	2.99145	0.0873028	SLC9A9,KCNMB3,CCL1,GNA15,CCL3,ADORA2A,WFS1,EDN1,SLC7A8,BNIP3,FKBP1A,GCLM,CKB,MBP,APP,CYP27B1,CCL23,SLC30A1,HAMP,HMOX1,BCL2,IL1B,MT1H,EIF2B4,MT3,ERCC2,MAFG,GIMAP5,OPRL1,CCL19,FZD2,SOD1,SOD2,PROK2,CD55,ATP6V0E2,ADM,ATP2C1,NAB2,MT2A,PRNP,PMP22	1073	404	13123	1.27146	1	0.644456	81.4368
GO:0009150~purine ribonucleotide metabolic process	17	1.21083	0.0882784	ATP5D,ATP1B3,ATP6AP1,NADK,ATP13A3,AMPD3,PFAS,PPAT,GART,GCH1,ATP6V0E2,ATIC,ATP2C1,ATP6V0A1,ATP5A1,CTNS,IMPDH2	1073	136	13123	1.52877	1	0.647616	81.7992
GO:0042110~T cell activation	16	1.1396	0.0893829	EGR1,GIMAP5,PRKDC,FKBP1A,HLA-DMA,CTNNB1,CD48,DOCK2,CD80,BCL2,RIPK2,BCL3,ADAM17,HSPD1,DNAJA3,SYK	1073	126	13123	1.55304	1	0.651288	82.2013
GO:0030336~negative regulation of cell migration	9	0.641026	0.0905508	NISCH,PDGFB,CLIC4,HMOX1,BCL2,GREM1,VASH1,TRIB1,VCL	1073	57	13123	1.93108	1	0.655177	82.6175
GO:0002695~negative regulation of leukocyte activation	9	0.641026	0.0905508	GIMAP5,IL2RA,ADORA2A,HMOX1,HLX,CD274,BCL6,INPP5D,PAG1	1073	57	13123	1.93108	1	0.655177	82.6175
GO:0048870~cell motility	33	2.35043	0.0920907	CTHRC1,IL16,PDGFB,TNFRSF12A,WASF2,PRKDC,TNFSF12,GPX1,DOCK2,PTK2,GAB2,CD44,IL1B,SCARB1,PPAP2A,PPAP2B,SYK,IL6,VAV3,IL8,ARID5B,NR4A2,HIF1A,TNS1,ID1,LAMA5,BTG1,ETS1,ADAM17,HBEGF,LRP8,VCAN,PLAU	1073	307	13123	1.31465	1	0.660564	83.1521
GO:0051674~localization of cell	33	2.35043	0.0920907	CTHRC1,IL16,PDGFB,TNFRSF12A,WASF2,PRKDC,TNFSF12,GPX1,DOCK2,PTK2,GAB2,CD44,IL1B,SCARB1,PPAP2A,PPAP2B,SYK,IL6,VAV3,IL8,ARID5B,NR4A2,HIF1A,TNS1,ID1,LAMA5,BTG1,ETS1,ADAM17,HBEGF,LRP8,VCAN,PLAU	1073	307	13123	1.31465	1	0.660564	83.1521
GO:0051346~negative regulation of hydrolase activity	8	0.569801	0.0932669	GPX1,ADORA2A,SMAD6,FKBP1A,DNAJA3,GCHFR,DNAJB6,ANGPTL4	1073	48	13123	2.03837	1	0.664347	83.5499
GO:0042401~biogenic amine biosynthetic process	6	0.42735	0.0933738	ODC1,SRM,ASMTL,NR4A2,SMS,GCH1	1073	30	13123	2.44604	1	0.66369	83.5857
GO:0045768~positive regulation of anti-apoptosis	6	0.42735	0.0933738	CDKN1A,IL6,DUSP1,BTG2,ADM,HMOX1	1073	30	13123	2.44604	1	0.66369	83.5857
GO:0009306~protein secretion	6	0.42735	0.0933738	TRAF3IP2,ARFGAP3,ABCA1,NLRP3,PCSK5,CXCL10	1073	30	13123	2.44604	1	0.66369	83.5857
GO:0006479~protein amino acid methylation	7	0.498575	0.0946232	PRMT1,BTG2,GSPT1,BTG1,EZH2,PCMT1,CARM1	1073	39	13123	2.19516	1	0.667712	83.9977
GO:0060326~cell chemotaxis	7	0.498575	0.0946232	DOCK2,IL6,IL8,IL16,PDGFB,IL1B,SYK	1073	39	13123	2.19516	1	0.667712	83.9977
GO:0051147~regulation of muscle cell differentiation	7	0.498575	0.0946232	EREG,BTG1,BCL2,EZH2,EDN1,RCAN1,AGRN	1073	39	13123	2.19516	1	0.667712	83.9977
GO:0008213~protein amino acid alkylation	7	0.498575	0.0946232	PRMT1,BTG2,GSPT1,BTG1,EZH2,PCMT1,CARM1	1073	39	13123	2.19516	1	0.667712	83.9977
GO:0006959~humoral immune response	11	0.783476	0.0955539	TRAF3IP2,PSMB10,CD83,GPI,CD55,IL6,CFB,BCL2,BCL3,TREM1,EBI3	1073	77	13123	1.74717	1	0.670388	84.2982
GO:0007167~enzyme linked receptor protein signaling pathway	36	2.5641	0.0956046	MTSS1,TWSG1,MPZL1,PDGFB,ADORA2A,ATP6AP1,TIPARP,FKBP1A,EPHB2,ACVR1B,PTK2,AGRN,SYK,CSF1R,IRAK1,BMP2,IRS2,SOCS2,PTPRF,PTPN2,ARID5B,SMAD6,PICK1,AXL,EREG,ID1,HIPK2,VEGFA,ARF4,ADAM17,HBEGF,TGFBRAP1,PTPN1,BAMBI,BMP6,TOB1	1073	341	13123	1.29116	1	0.669505	84.3145
GO:0055082~cellular chemical homeostasis	39	2.77778	0.0983144	KCNMB3,CCL1,GNA15,CCL3,ADORA2A,WFS1,EDN1,BNIP3,FKBP1A,GCLM,CKB,MBP,APP,GCKR,CCL23,SLC30A1,HAMP,BCL2,IL1B,MT1H,EIF2B4,ERCC2,MT3,MAFG,GIMAP5,OPRL1,CCL19,FZD2,SOD1,SOD2,PROK2,CD55,ATP6V0E2,ADM,ATP2C1,NAB2,MT2A,PRNP,PMP22	1073	375	13123	1.27194	1	0.679173	85.1585
GO:0043542~endothelial cell migration	5	0.356125	0.0996313	GPX1,PTK2,ID1,SCARB1,TNFSF12	1073	22	13123	2.77959	1	0.683207	85.5531
GO:0015807~L-amino acid transport	5	0.356125	0.0996313	SLC36A1,SLC1A3,SLC7A8,CTNS,SLC7A5	1073	22	13123	2.77959	1	0.683207	85.5531
GO:0060675~ureteric bud morphogenesis	5	0.356125	0.0996313	BMP2,CD44,LAMA5,BCL2,GREM1	1073	22	13123	2.77959	1	0.683207	85.5531
GO:0001658~branching involved in ureteric bud morphogenesis	5	0.356125	0.0996313	BMP2,CD44,LAMA5,BCL2,GREM1	1073	22	13123	2.77959	1	0.683207	85.5531

## Sheet: 24h_BP_HMDM
Table S6. GO term enrichment
Term	Count	%	PValue	Genes	List Total	Pop Hits	Pop Total	Fold Enrichment	Bonferroni	Benjamini	FDR
GO:0006955~immune response	139	8.24926	2.48941e-19	IL16,AQP9,TBK1,SNCA,TLR2,TNFSF12,TLR5,IL15,TLR6,CXCL12,C1QC,TLR7,CLEC4E,LILRA3,CLEC4A,CFH,IL1B,VNN1,ERAP2,CLEC4D,CFD,PAG1,EBI3,IL1A,HLA-H,F12,BST2,NCF1,NCF4,HLA-A,CCL4L1,CCL4L2,SERPING1,TNFRSF14,HLA-B,HLA-E,HLA-DQA1,HLA-F,C1QA,LILRB1,LILRB2,C1QB,PPBP,LILRB5,VEGFA,CD300LF,HLA-DPA1,CLEC5A,HLA-DRA,CCL1,ORAI1,CCL3,CCL2,IFITM2,ENPP2,IFITM3,HLA-DRB3,ACP5,FCGRT,FTH1,ADA,CD74,SLC11A1,HLA-DRB4,FCER1G,HLA-…	1307	642	13123	2.17389	9.99497e-16	9.99497e-16	4.62804e-16
GO:0006414~translational elongation	38	2.25519	2.42377e-13	RPL18,RPL17,EEF1B2,RPL19,RPL15,RPL27A,RPL35,RPL36,RPS3,RPL32,RPL6,RPLP1,RPL3,FAU,RPL5,RPL12,RPL4,RPL10A,RPS23,RPSA,RPL26,RPS9,RPL27,EEF2,RPS6,RPS4X,RPS5,RPS18,RPL18A,RPL13A,RPL22,RPS17,RPS14,TSFM,RPS15,RPS13,EEF1G,RPS11	1307	99	13123	3.85395	9.73082e-10	4.86541e-10	4.50573e-10
GO:0009611~response to wounding	104	6.17211	4.88207e-12	ADORA3,S100A8,PDGFB,F13A1,S100A9,GNA12,TLR2,TLR5,IL15,TLR6,C1QC,TLR7,FNTB,NLRC4,DYSF,CD44,CFH,VNN1,IL1B,CFD,IL1A,F12,GATM,PDPN,CCL4L1,SERPING1,CCL4L2,CD40,PLAUR,C1QA,TNFAIP6,C1QB,HIF1A,CD36,TFPI,TPST1,CCL3,CCL2,ADORA2A,PABPC4,MST1,SRF,SLC11A1,LAMB2,SCARB1,PTPN6,BMP2,IL1RN,NOTCH3,P2RX7,P2RX1,ITGA5,NRP1,NDST1,LY86,PRDX5,NFKB1,MMP25,CD97,CXCR4,CCL3L1,AOAH,CCL3L3,MGLL,SERPINA1,IRAK2,NFKBIZ,LYN,LY96,E…	1307	522	13123	2.00042	1.96016e-08	6.53387e-09	9.07628e-09
GO:0006954~inflammatory response	74	4.39169	6.74546e-12	ADORA3,S100A8,NDST1,LY86,S100A9,TLR2,PRDX5,NFKB1,TLR5,IL15,TLR6,TLR7,C1QC,MMP25,CD97,NLRC4,CD44,CXCR4,CCL3L1,AOAH,CCL3L3,CFH,MGLL,VNN1,IL1B,SERPINA1,CFD,IL1A,IRAK2,F12,NFKBIZ,LYN,LY96,PDPN,CCL4L1,SERPING1,CCL4L2,CD40,C1QA,TNFAIP6,C1QB,HIF1A,ACVR1,TPST1,CXCL1,CCL3,CCL2,ADORA2A,CXCL2,FPR2,CXCL6,GPR68,MIF,SLC11A1,CCL23,IL10RB,C2,THBS1,BMP2,IL2RA,CEBPB,LIPA,OLR1,IL8,IL1RN,CCL13,CYBB,P2RX7,P2RX1,NUPR1…	1307	320	13123	2.32188	2.70832e-08	6.77079e-09	1.25405e-08
GO:0019882~antigen processing and presentation	26	1.54303	9.1012e-10	HLA-DQB1,HLA-DRB3,FCGRT,HLA-DMB,HLA-DMA,CD74,SLC11A1,HLA-DRB4,FCER1G,ERAP2,HLA-DPB1,HLA-DOA,HLA-H,HLA-A,CD1C,CD1B,CD1A,HLA-B,HLA-E,CD1E,PSMB8,HLA-DQA1,HLA-F,PSMB9,HLA-DPA1,HLA-DRA	1307	65	13123	4.01622	3.65413e-06	7.30826e-07	1.692e-06
GO:0006952~defense response	108	6.4095	1.07612e-09	ADORA3,S100A8,TBK1,S100A9,SNCA,TLR2,TLR5,IL15,TLR6,C1QC,TLR7,CD48,NLRC4,CD44,HIST1H2BK,LILRA3,CFH,VNN1,CSF3R,IL1B,CFD,IL1A,GNG7,F12,PDPN,NCF1,CCL4L1,SERPING1,CCL4L2,CD40,HLA-B,C1QA,TNFAIP6,LILRB2,C1QB,HIF1A,PPBP,LILRB5,MNDA,CLEC5A,HLA-DRA,TPST1,CCL3,CCL2,ADORA2A,CD74,SLC11A1,LGALS3BP,BMP2,IL1RN,CD300C,SLAMF7,VDAC3,P2RX7,PENK,P2RX1,CXCL16,KYNU,NDST1,LY86,PPARG,PRDX5,NFKB1,PRDX1,MMP25,CD97,CXCR4,CC…	1307	601	13123	1.80429	4.32062e-06	7.20105e-07	2.00061e-06
GO:0002684~positive regulation of immune system process	55	3.26409	3.44539e-09	STAT5A,TLR2,ITPKB,IL15,TNFSF12,TLR6,TLR7,HLA-DMA,C1QC,CXCL12,HLX,CFH,VNN1,IL1B,CFD,EBI3,SYK,IRAK2,IRAK1,ADAM10,LYN,SERPING1,CD40,C1QA,MAPK1,C1QB,CD38,CD37,CD80,EREG,TNFSF13B,VEGFA,CD226,HLA-DRA,NFKBIA,CACNB3,IL7R,CD74,ADA,SLC11A1,PVRL2,FCER1G,CD4,BCL6,C2,INPP5D,THBS1,GIMAP5,IL2RA,CBLB,P2RX7,CDKN1A,FYN,C1RL,HSPD1	1307	236	13123	2.33996	1.38332e-05	1.97618e-06	6.40531e-06
GO:0042981~regulation of apoptosis	127	7.53709	8.23921e-08	MEF2C,MAEA,PTGS2,WFS1,STAT5A,SNCA,TLR2,FOXO1,TNFSF12,ITSN1,CITED2,PECR,NLRC4,APP,HTRA2,CD44,CDKN2D,IL1B,VNN1,NGFRAP1,NQO1,IL1A,SOCS2,SOCS3,AARS,ACTN1,PIM2,CSDA,CD38,MAPK1,TXNDC5,VEGFA,RIPK3,DCUN1D3,TNFAIP3,FGD2,CCL2,MCL1,GSDMA,ADORA2A,ADAMTSL4,NFKBIA,PPT1,HSPA1A,HSPA1B,ADA,CD74,DYRK2,BMF,RUNX3,PLAGL2,HERPUD1,PHB,SPHK1,SLAMF7,RPS6,ATM,P2RX4,ATF5,CDKN1A,P2RX7,P2RX1,NUP62,HSPD1,ABL1,DNAJB6,DAP3,IER3…	1307	801	13123	1.59195	0.00033075	4.13497e-05	0.000153175
GO:0043067~regulation of programmed cell death	128	7.59644	8.28968e-08	MEF2C,MAEA,PTGS2,WFS1,STAT5A,SNCA,TLR2,FOXO1,TNFSF12,ITSN1,CITED2,PECR,NLRC4,APP,HTRA2,CD44,CDKN2D,IL1B,VNN1,NGFRAP1,NQO1,IL1A,SOCS2,SOCS3,AARS,ACTN1,PIM2,CSDA,CD38,MAPK1,TXNDC5,VEGFA,RIPK3,DCUN1D3,TNFAIP3,LRRK2,FGD2,CCL2,MCL1,GSDMA,ADORA2A,ADAMTSL4,NFKBIA,HSPA1A,PPT1,HSPA1B,ADA,CD74,DYRK2,BMF,RUNX3,PLAGL2,HERPUD1,PHB,SPHK1,SLAMF7,RPS6,ATM,P2RX4,ATF5,CDKN1A,P2RX7,P2RX1,NUP62,HSPD1,ABL1,DNAJB6,DAP…	1307	809	13123	1.58862	0.000332775	3.69805e-05	0.000154113
GO:0010941~regulation of cell death	128	7.59644	1.02979e-07	MEF2C,MAEA,PTGS2,WFS1,STAT5A,SNCA,TLR2,FOXO1,TNFSF12,ITSN1,CITED2,PECR,NLRC4,APP,HTRA2,CD44,CDKN2D,IL1B,VNN1,NGFRAP1,NQO1,IL1A,SOCS2,SOCS3,AARS,ACTN1,PIM2,CSDA,CD38,MAPK1,TXNDC5,VEGFA,RIPK3,DCUN1D3,TNFAIP3,LRRK2,FGD2,CCL2,MCL1,GSDMA,ADORA2A,ADAMTSL4,NFKBIA,HSPA1A,PPT1,HSPA1B,ADA,CD74,DYRK2,BMF,RUNX3,PLAGL2,HERPUD1,PHB,SPHK1,SLAMF7,RPS6,ATM,P2RX4,ATF5,CDKN1A,P2RX7,P2RX1,NUP62,HSPD1,ABL1,DNAJB6,DAP…	1307	812	13123	1.58275	0.000413377	4.13454e-05	0.000191448
GO:0010324~membrane invagination	49	2.90801	1.22066e-07	MSR1,AP1B1,PDLIM7,MYO7A,WASF2,SNCA,SORL1,ITSN1,ASGR1,APP,PICALM,PACSIN2,AP3B2,SCAMP1,CLN3,ATP6V1H,ELMO1,ADRB2,CD36,LRP10,RAB5A,TOM1,SORT1,BIN1,ABCA7,ADORA2A,CDC42SE1,PPT1,CLEC10A,SLC11A1,DNER,FCN1,FCER1G,SCARB1,EHD1,THBS1,LRSAM1,HCK,AP2A2,P2RX7,NME1-NME2,STAB1,CDC42SE2,CXCL16,LRP8,MERTK,CD302,LRP3,CD14	1307	220	13123	2.2363	0.000489976	4.45532e-05	0.000226933
GO:0006897~endocytosis	49	2.90801	1.22066e-07	MSR1,AP1B1,PDLIM7,MYO7A,WASF2,SNCA,SORL1,ITSN1,ASGR1,APP,PICALM,PACSIN2,AP3B2,SCAMP1,CLN3,ATP6V1H,ELMO1,ADRB2,CD36,LRP10,RAB5A,TOM1,SORT1,BIN1,ABCA7,ADORA2A,CDC42SE1,PPT1,CLEC10A,SLC11A1,DNER,FCN1,FCER1G,SCARB1,EHD1,THBS1,LRSAM1,HCK,AP2A2,P2RX7,NME1-NME2,STAB1,CDC42SE2,CXCL16,LRP8,MERTK,CD302,LRP3,CD14	1307	220	13123	2.2363	0.000489976	4.45532e-05	0.000226933
GO:0002504~antigen processing and presentation of peptide or polysaccharide antigen via MHC class II	12	0.712166	1.49739e-07	HLA-DQB1,HLA-DRB3,HLA-DRB4,FCER1G,HLA-DPA1,HLA-DPB1,HLA-DMB,HLA-DOA,HLA-DMA,CD74,HLA-DQA1,HLA-DRA	1307	18	13123	6.6937	0.000601021	5.00989e-05	0.000278379
GO:0043066~negative regulation of apoptosis	67	3.97626	3.03073e-07	MEF2C,IER3,MAEA,WFS1,STAT5A,SNCA,PRDX5,FOXO1,NFKB1,ITSN1,PTEN,CITED2,CLCF1,CDKN2D,BAG3,VNN1,IL1B,CAT,IL1A,IRAK1,CLN3,SOCS2,SOCS3,AARS,PIM2,CSDA,BTG2,TNFSF13B,TXNDC5,HIPK2,VEGFA,SERPINB2,SORT1,PRNP,TNFAIP3,CLN8,ACVR1,CCL2,MCL1,ADORA2A,NFKBIA,COL2A1,PPT1,HSPA1A,HSPA1B,CD74,ADA,MIF,COMP,RB1CC1,TGM2,BCL3,BCL6,THBS1,ERCC1,ERCC2,GIMAP5,CEBPB,SPHK1,IGF1,ATM,SOD2,ATF5,HSP90B1,CDKN1A,NUP62,NME1-NME2,HSPD1	1307	353	13123	1.90571	0.0012161	9.35985e-05	0.00056344
GO:0006412~translation	62	3.67953	3.82712e-07	RPL18,RPL17,MRPL41,RPL19,ZNFX1,RPL15,EIF2A,QARS,RPS3,DMXL2,RPLP1,FAU,RPL12,TNIP1,AARS,EIF2S3,EEF2,MRPS6,RPS4X,SARS2,EIF4G1,EIF4G2,TARS,RPS18,MRPS18B,MRPS9,RPS17,RPS14,RPS15,EEF1G,RPS13,RPS11,EIF4E3,EEF1B2,PABPC4,RPL27A,RPL35,RPL36,EIF3D,RPL32,RPL6,MRPL17,EIF3E,RPL3,RPL5,RPL10A,RPL4,RPS23,EIF3M,RPSA,RPL26,RPL27,RPS9,RPS6,RPS5,MRPL24,EIF4B,MRPL23,RPL18A,RPL13A,RPL22,TSFM	1307	319	13123	1.95146	0.00153541	0.00010975	0.000711496
GO:0043069~negative regulation of programmed cell death	67	3.97626	5.1539e-07	MEF2C,IER3,MAEA,WFS1,STAT5A,SNCA,PRDX5,FOXO1,NFKB1,ITSN1,PTEN,CITED2,CLCF1,CDKN2D,BAG3,VNN1,IL1B,CAT,IL1A,IRAK1,CLN3,SOCS2,SOCS3,AARS,PIM2,CSDA,BTG2,TNFSF13B,TXNDC5,HIPK2,VEGFA,SERPINB2,SORT1,PRNP,TNFAIP3,CLN8,ACVR1,CCL2,MCL1,ADORA2A,NFKBIA,COL2A1,PPT1,HSPA1A,HSPA1B,CD74,ADA,MIF,COMP,RB1CC1,TGM2,BCL3,BCL6,THBS1,ERCC1,ERCC2,GIMAP5,CEBPB,SPHK1,IGF1,ATM,SOD2,ATF5,HSP90B1,CDKN1A,NUP62,NME1-NME2,HSPD1	1307	358	13123	1.8791	0.00206715	0.000137943	0.000958155
GO:0060548~negative regulation of cell death	67	3.97626	5.70725e-07	MEF2C,IER3,MAEA,WFS1,STAT5A,SNCA,PRDX5,FOXO1,NFKB1,ITSN1,PTEN,CITED2,CLCF1,CDKN2D,BAG3,VNN1,IL1B,CAT,IL1A,IRAK1,CLN3,SOCS2,SOCS3,AARS,PIM2,CSDA,BTG2,TNFSF13B,TXNDC5,HIPK2,VEGFA,SERPINB2,SORT1,PRNP,TNFAIP3,CLN8,ACVR1,CCL2,MCL1,ADORA2A,NFKBIA,COL2A1,PPT1,HSPA1A,HSPA1B,CD74,ADA,MIF,COMP,RB1CC1,TGM2,BCL3,BCL6,THBS1,ERCC1,ERCC2,GIMAP5,CEBPB,SPHK1,IGF1,ATM,SOD2,ATF5,HSP90B1,CDKN1A,NUP62,NME1-NME2,HSPD1	1307	359	13123	1.87386	0.00228884	0.000143206	0.00106103
GO:0050778~positive regulation of immune response	34	2.0178	3.10807e-06	STAT5A,TLR2,NFKBIA,CACNB3,IL15,TLR6,C1QC,HLA-DMA,TLR7,ADA,SLC11A1,PVRL2,CFH,FCER1G,IL1B,C2,CFD,SYK,IRAK2,IRAK1,GIMAP5,LYN,SERPING1,C1QA,MAPK1,C1QB,P2RX7,TNFSF13B,EREG,FYN,C1RL,HSPD1,CD226,HLA-DRA	1307	143	13123	2.38726	0.0124014	0.000733784	0.00577803
GO:0048584~positive regulation of response to stimulus	47	2.78932	4.78159e-06	IL16,PDGFB,STAT5A,TLR2,NFKBIA,CACNB3,IL15,TLR6,TLR7,C1QC,CXCL12,HLA-DMA,ADA,SLC11A1,CYP27B1,PVRL2,TGM2,CFH,FCER1G,IL1B,C2,CFD,THBS1,SYK,IRAK2,PRKCA,IRAK1,ADAM10,GIMAP5,LYN,IL8,SERPING1,OSM,C1QA,MAPK1,C1QB,P2RX7,NDEL1,TNFSF13B,EREG,FYN,HIPK2,VEGFA,C1RL,HSPD1,CD226,HLA-DRA	1307	234	13123	2.01669	0.019015	0.00106599	0.00888906
GO:0016044~membrane organization	66	3.91691	7.96642e-06	OXA1L,MSR1,PDLIM7,AP1B1,MYO7A,WASF2,SNCA,SORL1,ITSN1,ASGR1,APP,PICALM,DYSF,PACSIN2,ATG7,AP3B2,SCAMP1,CLN3,TAZ,ATP6V1H,ELMO1,ADRB2,CD36,NDEL1,LRP10,TXNDC5,RAB5A,LRMP,SORT1,TOM1,BIN1,CLN8,ABCA7,SAMM50,ADORA2A,CDC42SE1,PPT1,CLEC10A,FTH1,CD9,SLC11A1,DOCK2,DNER,FCN1,FCER1G,SCARB1,STX11,EHD1,THBS1,LRSAM1,GIMAP5,A4GALT,HCK,PLSCR1,P2RX7,AP2A2,NME1-NME2,CDC42SE2,STAB1,CXCL16,PLSCR3,LRP8,MERTK,CD302,LRP3,C…	1307	379	13123	1.74849	0.0314792	0.00168202	0.0148093
GO:0050867~positive regulation of cell activation	28	1.66172	8.56153e-06	STAT5A,ITPKB,IL15,TNFSF12,IL7R,HLA-DMA,ADA,CD74,HLX,PVRL2,VNN1,IL1B,BCL6,CD4,INPP5D,THBS1,EBI3,SYK,IL2RA,GIMAP5,PDPN,CD40,CD38,CDKN1A,TNFSF13B,CD80,HSPD1,CD226	1307	111	13123	2.53275	0.0337906	0.00171726	0.0159155
GO:0002696~positive regulation of leukocyte activation	27	1.60237	1.06443e-05	STAT5A,ITPKB,IL15,TNFSF12,IL7R,HLA-DMA,ADA,CD74,HLX,PVRL2,VNN1,IL1B,BCL6,CD4,INPP5D,THBS1,EBI3,SYK,IL2RA,GIMAP5,CD40,CD38,CDKN1A,TNFSF13B,CD80,HSPD1,CD226	1307	106	13123	2.5575	0.0418367	0.00203303	0.0197869
GO:0010033~response to organic substance	107	6.35015	1.71428e-05	ADCY3,ADCY7,AQP9,PTGS2,PDGFB,STAT5A,PTGS1,SNCA,TLR2,FOXO1,TLR6,CITED1,CD48,CD44,CREB3L2,IL1B,GNG7,F12,GATM,SOCS2,SOCS3,BAIAP2,AARS,FBP1,MAPK1,C1QB,CD38,NFE2L2,CYP1B1,CCL2,MCL1,ADORA2A,NFKBIA,ACP5,ACP2,HSPA1A,HSPA1B,SRF,TTC3,SLC11A1,PEMT,DNAJA1,SCARB1,ERO1L,HERPUD1,IL1RN,EPHX1,P2RX4,P2RX7,CDKN1A,P2RX1,NUP62,CXCL16,PRKAR1A,ALDH2,DNAJB1,HSPD1,PTPN1,PARP1,DNAJB6,ATP7B,HSP90AB1,KYNU,IGFBP7,PPARG,PTEN,…	1307	718	13123	1.49629	0.0665137	0.0031237	0.0318653
GO:0050865~regulation of cell activation	37	2.19585	1.80549e-05	PDGFB,ADORA2A,STAT5A,SNCA,ITPKB,IL15,TNFSF12,IL7R,HLA-DMA,CD74,ADA,MIF,HLX,PVRL2,VNN1,IL1B,CD4,BCL6,INPP5D,THBS1,HLA-DOA,EBI3,PAG1,SYK,IL2RA,GIMAP5,PDPN,FLT3,TNFRSF14,CD40,CD38,CDKN1A,CBLB,TNFSF13B,CD80,HSPD1,CD226	1307	175	13123	2.12286	0.0699261	0.00314683	0.0335605
GO:0045321~leukocyte activation	46	2.72997	2.3769e-05	STAT5A,SNCA,TLR2,ITPKB,IL15,TLR6,IL7R,TPD52,TLR7,CXCL12,HLA-DMA,CD74,ADA,CD48,SLC11A1,DOCK2,CXCR5,CXCR4,CLCF1,BCL3,CD4,BCL6,NDRG1,ERCC1,IMPDH2,KIF13B,SYK,ADAM10,GIMAP5,BST2,LYN,IL8,FLT3,CD40,SLAMF7,MYH9,SLAMF1,IFNAR1,CBLB,P2RX7,CCND3,CD80,FYN,RPL22,HSPD1,LCP1	1307	241	13123	1.91645	0.0910213	0.00396851	0.0441796
GO:0008285~negative regulation of cell proliferation	62	3.67953	2.39407e-05	RARRES3,RARRES1,PTGS2,IGFBP7,E2F7,PPARG,FGFRL1,IL15,MXI1,PTEN,FNTB,ANG,CCL3L1,CDKN2D,CCL3L3,IL1B,CDK10,IL1A,PRKCA,PTPRM,TNFRSF14,OSM,BTG2,ADM,EREG,BTG1,BTG3,PMP22,SMARCA2,CXCL1,ADORA2A,TIMP2,SESN1,FTH1,CD9,CYP27B1,CCL23,PEMT,BCL6,INPP5D,PPAP2A,THBS1,GPNMB,QSOX1,RUNX3,CEBPA,PTPN6,TESC,BMP2,IL2RA,IL8,FLT3,PHB,KLF11,WDR6,TRIM24,SOD2,CBLB,CDKN1A,NUP62,NME1-NME2,NUPR1,TOB1	1307	361	13123	1.72442	0.0916476	0.00383753	0.0444986
GO:0042592~homeostatic process	109	6.46884	3.03185e-05	GNA15,MAEA,AQP9,WFS1,ATOX1,STAT5A,SNCA,SLC7A8,MPV17,LPAR1,CXCL12,APP,IL1B,IL1A,IDUA,CLNS1A,TTC7A,CD38,HIF1A,ATP2C1,RPS17,TXNDC5,RPS14,VEGFA,PMP22,SLC40A1,KCNMB3,CCL1,BBS4,CCL3,CCL2,MCL1,ADORA2A,ACP5,PPT1,SRF,FTH1,TIMP1,SLC11A1,RAC2,SLC30A1,SCARB1,SEPW1,HERPUD1,EPAS1,AFG3L2,RPS6,DNASE2,P2RX4,TXNDC11,P2RX7,ATP6V0E2,P2RX1,PARP1,CLCN6,ATP7B,PPARG,DNAJC10,PRDX5,PDIA6,TERF2IP,PRDX1,MBP,NUBP1,TPP1,ANG,C…	1307	744	13123	1.47099	0.114613	0.00467101	0.05635
GO:0002694~regulation of leukocyte activation	35	2.07715	3.3576e-05	ADORA2A,STAT5A,SNCA,ITPKB,IL15,TNFSF12,IL7R,HLA-DMA,ADA,CD74,MIF,HLX,PVRL2,VNN1,IL1B,CD4,BCL6,INPP5D,THBS1,HLA-DOA,EBI3,PAG1,SYK,GIMAP5,IL2RA,FLT3,TNFRSF14,CD40,CD38,CDKN1A,CBLB,TNFSF13B,CD80,HSPD1,CD226	1307	166	13123	2.11698	0.126118	0.00498052	0.0624026
GO:0048002~antigen processing and presentation of peptide antigen	12	0.712166	3.94226e-05	HLA-H,SLC11A1,HLA-A,FCER1G,ERAP2,HLA-B,HLA-E,HLA-DOA,HLA-DMA,CD74,HLA-DRA,HLA-F	1307	28	13123	4.30309	0.146393	0.00563708	0.0732649
GO:0006909~phagocytosis	16	0.949555	3.9461e-05	ABCA7,ADORA2A,MYO7A,HCK,CDC42SE1,ELMO1,SLC11A1,P2RX7,CD36,CDC42SE2,FCN1,FCER1G,SCARB1,MERTK,THBS1,CD14	1307	48	13123	3.34685	0.146525	0.00544852	0.0733364
GO:0001775~cell activation	51	3.02671	4.37243e-05	STAT5A,SNCA,TLR2,ITPKB,IL15,TLR6,TPD52,TLR7,HLA-DMA,CXCL12,CD48,CXCR5,CXCR4,CLCF1,IMPDH2,SYK,KIF13B,ADAM10,LYN,BST2,CD40,MYH9,IFNAR1,CCND3,CD80,LCP1,ADORA2A,IL7R,CD74,ADA,CD9,SLC11A1,DOCK2,BCL3,CD4,NDRG1,BCL6,ERCC1,GIMAP5,IL8,FLT3,SLAMF7,SLAMF1,P2RX4,PLSCR1,CBLB,P2RX7,P2RX1,FYN,RPL22,HSPD1	1307	284	13123	1.80306	0.16101	0.0058348	0.0812564
GO:0051251~positive regulation of lymphocyte activation	24	1.42433	5.99063e-05	IL2RA,GIMAP5,STAT5A,ITPKB,TNFSF12,CD40,IL15,IL7R,HLA-DMA,ADA,CD74,CD38,CDKN1A,TNFSF13B,CD80,HLX,IL1B,VNN1,CD4,BCL6,HSPD1,INPP5D,EBI3,SYK	1307	97	13123	2.48426	0.21379	0.00772904	0.111313
GO:0015837~amine transport	27	1.60237	6.66172e-05	SLC44A1,SLC38A2,AQP9,SLC16A10,NFKBIE,SLC38A7,CHKB,SLC38A6,SLC7A8,SLC7A5,SLC11A1,SLC1A5,FOLR2,SERINC1,SLC22A5,ARL6IP5,SLC43A2,SYK,ARL2,CLN3,LYN,PDPN,SLC3A2,SLC7A11,P2RX1,SLC38A1,CLN8	1307	117	13123	2.31705	0.234692	0.00832382	0.123775
GO:0042330~taxis	33	1.95846	7.09704e-05	CXCL1,CCL1,CCL3,CCL2,CXCL5,IL16,PDGFB,ENPP2,CXCL2,S100A9,FPR1,CXCL6,FPR2,CXCL12,DOCK2,CCL23,RAC2,CXCR4,CCL3L1,CCL3L3,RALA,IL1B,SEMA3A,SYK,PRKCA,PLP2,IL8,CCL4L1,CCL4L2,PLAUR,MAPK1,CCL13,PPBP,CXCL16,CMTM7	1307	158	13123	2.09708	0.247953	0.00859786	0.131858
GO:0006935~chemotaxis	33	1.95846	7.09704e-05	CXCL1,CCL1,CCL3,CCL2,CXCL5,IL16,PDGFB,ENPP2,CXCL2,S100A9,FPR1,CXCL6,FPR2,CXCL12,DOCK2,CCL23,RAC2,CXCR4,CCL3L1,CCL3L3,RALA,IL1B,SEMA3A,SYK,PRKCA,PLP2,IL8,CCL4L1,CCL4L2,PLAUR,MAPK1,CCL13,PPBP,CXCL16,CMTM7	1307	158	13123	2.09708	0.247953	0.00859786	0.131858
GO:0007243~protein kinase cascade	61	3.62018	7.53103e-05	NDST1,TBK1,STAT5A,GNA12,TLR2,ITPKB,TLR5,LPAR1,TLR6,TLR7,MAP3K6,CXCR4,CLCF1,SPRED2,TGFA,IL1B,SPRED1,SYK,PRKCA,IRAK2,IRAK1,RET,TNIK,SOCS2,LY96,SOCS3,ARHGEF6,G3BP2,TANK,IFNAR1,MARK2,OSM,MAPK1,SH2D3C,SS18,RIPK3,LRRK2,WNT5A,CCL2,PTPLAD1,FPR1,NFKBIA,MAP4K1,AKAP11,CD74,PPP2CA,RB1CC1,BCL3,PRKAA1,THBS1,CCM2,MAP2K4,SHANK3,STAT2,ICK,P2RX7,RPS6KA3,RPS6KA2,FYN,TRIP6,DUSP6	1307	367	13123	1.66887	0.260945	0.00885416	0.139916
GO:0042127~regulation of cell proliferation	112	6.64688	7.59089e-05	RARRES3,RARRES1,PTGS2,PDGFB,STAT5A,PTGS1,FGFRL1,MMP7,FOXO1,IL15,TNFSF12,MXI1,FNTB,CDKN2D,IL1B,IL1A,EBI3,MATK,SYK,PTPRM,TNFRSF14,CD40,VEGFB,MAPK1,CD38,HIF1A,VEGFA,LAMC1,PMP22,SMARCA2,CCL2,ADORA2A,NFKBIA,TIMP2,SESN1,FTH1,ADA,TIMP1,RAC2,PEMT,RUNX3,PTPN6,ODC1,BMP2,TESC,PHB,KLF11,SPHK1,WDR6,ROGDI,RPS9,SLAMF1,CBLB,C19ORF10,CDKN1A,ATF3,NUP62,NAMPT,NRP1,MARCKSL1,IGFBP7,E2F7,PPARG,PTEN,ANG,CCL3L1,HLX,CCL3…	1307	786	13123	1.43071	0.262719	0.00867035	0.141028
GO:0045621~positive regulation of lymphocyte differentiation	13	0.771513	8.48675e-05	IL2RA,GIMAP5,STAT5A,ITPKB,IL7R,HLA-DMA,CD74,ADA,CD80,HLX,VNN1,INPP5D,SYK	1307	35	13123	3.72935	0.288769	0.00942083	0.157659
GO:0042110~T cell activation	28	1.66172	9.43465e-05	STAT5A,ITPKB,IL15,IL7R,HLA-DMA,CXCL12,ADA,CD74,CD48,SLC11A1,DOCK2,CXCR4,BCL3,CD4,SYK,KIF13B,GIMAP5,FLT3,MYH9,IFNAR1,P2RX7,CBLB,CD80,CCND3,RPL22,FYN,HSPD1,LCP1	1307	126	13123	2.23123	0.315331	0.0101861	0.175254
GO:0006575~cellular amino acid derivative metabolic process	33	1.95846	0.000103277	KYNU,CHKB,STAT5A,SNCA,KMO,AZIN1,GCH1,AGPAT6,P4HA2,P4HA1,SULT1A1,ASMTL,GSTK1,SULT1A3,PEMT,VNN1,SMOX,SULT1A4,VNN2,VNN3,ODC1,PLA2G15,EPAS1,MAT2A,GATM,MAOA,GSTT1,TPMT,CHPT1,PNPLA6,SOD2,GAMT,PCYOX1,MGST1	1307	161	13123	2.058	0.339448	0.0108533	0.191828
GO:0046649~lymphocyte activation	38	2.25519	0.000120263	STAT5A,ITPKB,IL15,IL7R,TPD52,HLA-DMA,CXCL12,CD74,ADA,CD48,SLC11A1,DOCK2,CXCR5,CXCR4,CLCF1,BCL3,CD4,BCL6,ERCC1,IMPDH2,KIF13B,SYK,GIMAP5,BST2,FLT3,SLAMF7,CD40,MYH9,SLAMF1,IFNAR1,P2RX7,CBLB,CCND3,CD80,FYN,RPL22,HSPD1,LCP1	1307	198	13123	1.92697	0.382999	0.0123053	0.223344
GO:0002250~adaptive immune response	20	1.18694	0.000146176	SERPING1,LY9,TLR6,C1QC,HLA-DMA,CD74,C1QA,SLC11A1,C1QB,IL18BP,VEGFA,C1RL,BCL3,FCER1G,INPP5D,C2,HSPD1,EBI3,ERCC1,HLA-DRA	1307	77	13123	2.60794	0.443974	0.0145664	0.271406
GO:0002460~adaptive immune response based on somatic recombination of immune receptors built from immunoglobulin superfamily domains	20	1.18694	0.000146176	SERPING1,LY9,TLR6,C1QC,HLA-DMA,CD74,C1QA,SLC11A1,C1QB,IL18BP,VEGFA,C1RL,BCL3,FCER1G,INPP5D,C2,HSPD1,EBI3,ERCC1,HLA-DRA	1307	77	13123	2.60794	0.443974	0.0145664	0.271406
GO:0045582~positive regulation of T cell differentiation	12	0.712166	0.000162903	IL2RA,GIMAP5,CD80,STAT5A,HLX,VNN1,ITPKB,IL7R,HLA-DMA,CD74,ADA,SYK	1307	32	13123	3.76521	0.480096	0.0158273	0.30242
GO:0019725~cellular homeostasis	71	4.21365	0.000189583	GNA15,ATOX1,WFS1,SNCA,DNAJC10,PRDX5,PDIA6,LPAR1,CXCL12,PRDX1,MBP,APP,NUBP1,CXCR4,IL1B,KCNMA1,PRKCA,CLNS1A,CLN3,EGR2,TTC7A,ACO1,ATP6V1H,CD38,HIF1A,ADM,ATP2C1,PRDX6,NAB2,TXNDC5,NAB1,GAA,PRNP,PMP22,SLC40A1,CCL1,KCNMB3,CCL3,CCL2,MCL1,ADORA2A,PPT1,SRF,FTH1,CD9,SLC11A1,CCL23,SLC30A1,TGM2,APEX1,QSOX1,MT1H,SCO2,ERCC2,SEPW1,HERPUD1,GIMAP5,FZD2,ITPR3,AFG3L2,SOD2,P2RX4,P2RX7,HSP90B1,TXNDC11,CCL13,ATP6V0E2,P…	1307	460	13123	1.54974	0.532917	0.0179617	0.351866
GO:0002822~regulation of adaptive immune response based on somatic recombination of immune receptors built from immunoglobulin superfamily domains	16	0.949555	0.000220347	GIMAP5,TNFSF12,CD40,IL7R,ADA,SLC11A1,P2RX7,TNFSF13B,CD80,HLX,PVRL2,IL1B,FCER1G,BCL6,HSPD1,CD226	1307	55	13123	2.92089	0.5872	0.0203663	0.408854
GO:0002237~response to molecule of bacterial origin	21	1.24629	0.000235069	IRAK1,CCL2,PTGS2,LY96,SOCS3,SNCA,TLR2,NFKBIA,TLR6,GCH1,MAPK1,SLC11A1,P2RX7,CYP27B1,ADM,IL1B,SERPINA1,SCARB1,CD14,MGST1,ABCC5	1307	86	13123	2.45176	0.610898	0.0212241	0.436114
GO:0034654~nucleobase, nucleoside, nucleotide and nucleic acid biosynthetic process	36	2.1365	0.000268511	ATP5D,ADCY3,NAMPT,KYNU,ATP1B3,ADCY7,ADORA2A,ATP5G2,KMO,CAD,ATP5G1,ADA,ATIC,C16ORF7,PAPSS1,ATP5I,ATP5H,IMPDH2,NAPRT1,DCTD,SHMT1,CECR1,ATP6V1H,PRPSAP1,AMPD3,APRT,NME4,ATP6V0E2,NME1-NME2,ADM,ATP2C1,ATP2A3,ATP6V0A1,PAICS,ATP6V0A2,ATP7B	1307	191	13123	1.89246	0.659799	0.0236756	0.498011
GO:0034404~nucleobase, nucleoside and nucleotide biosynthetic process	36	2.1365	0.000268511	ATP5D,ADCY3,NAMPT,KYNU,ATP1B3,ADCY7,ADORA2A,ATP5G2,KMO,CAD,ATP5G1,ADA,ATIC,C16ORF7,PAPSS1,ATP5I,ATP5H,IMPDH2,NAPRT1,DCTD,SHMT1,CECR1,ATP6V1H,PRPSAP1,AMPD3,APRT,NME4,ATP6V0E2,NME1-NME2,ADM,ATP2C1,ATP2A3,ATP6V0A1,PAICS,ATP6V0A2,ATP7B	1307	191	13123	1.89246	0.659799	0.0236756	0.498011
GO:0002819~regulation of adaptive immune response	16	0.949555	0.00027365	GIMAP5,TNFSF12,CD40,IL7R,ADA,SLC11A1,P2RX7,TNFSF13B,CD80,HLX,PVRL2,IL1B,FCER1G,BCL6,HSPD1,CD226	1307	56	13123	2.86873	0.666748	0.0236051	0.50752
GO:0051249~regulation of lymphocyte activation	30	1.78042	0.000275718	ADORA2A,STAT5A,ITPKB,IL15,TNFSF12,IL7R,HLA-DMA,ADA,CD74,HLX,VNN1,IL1B,BCL6,CD4,INPP5D,HLA-DOA,EBI3,PAG1,SYK,GIMAP5,IL2RA,FLT3,TNFRSF14,CD40,CD38,CDKN1A,CBLB,TNFSF13B,CD80,HSPD1	1307	148	13123	2.03525	0.669504	0.0232813	0.511345
GO:0000041~transition metal ion transport	18	1.06825	0.000327825	ATOX1,FKBP4,SFXN4,TCN2,SFXN5,FTH1,SLC11A1,ATP2C1,SLC30A1,SLC39A8,SLC30A2,SLC30A3,SLC31A2,COX17,SLC39A3,SLC40A1,SCO2,ATP7B	1307	69	13123	2.61927	0.73191	0.027053	0.607703
GO:0045580~regulation of T cell differentiation	15	0.890208	0.000329187	IL2RA,GIMAP5,STAT5A,ITPKB,IL15,IL7R,HLA-DMA,ADA,CD74,CD80,HLX,VNN1,BCL6,HLA-DOA,SYK	1307	51	13123	2.9531	0.733373	0.026617	0.610221
GO:0045619~regulation of lymphocyte differentiation	17	1.0089	0.000336438	GIMAP5,IL2RA,FLT3,STAT5A,ITPKB,IL15,IL7R,HLA-DMA,ADA,CD74,CD80,HLX,VNN1,BCL6,INPP5D,HLA-DOA,SYK	1307	63	13123	2.70935	0.741025	0.0266587	0.623622
GO:0007033~vacuole organization	13	0.771513	0.000355217	CLN3,CHMP5,MYO7A,NDP,HPS4,PPT1,ACP2,MAP1LC3A,ATG4C,TPP1,GAA,CLN8,IDUA	1307	40	13123	3.26318	0.75984	0.0275821	0.658323
GO:0006865~amino acid transport	21	1.24629	0.000381566	CLN3,SLC38A2,PDPN,NFKBIE,SLC16A10,CHKB,SLC38A7,SLC38A6,SLC3A2,SLC7A8,SLC7A5,SLC7A11,SLC11A1,SLC1A5,FOLR2,SERINC1,SLC38A1,SLC22A5,CLN8,ARL6IP5,SLC43A2	1307	89	13123	2.36912	0.783957	0.029037	0.706992
GO:0009967~positive regulation of signal transduction	49	2.90801	0.000392308	TBK1,ITPKB,LPAR1,TLR6,ITSN1,CITED1,CITED2,ACVR1B,CLCF1,IL1B,TGFA,CAT,CASP1,AGPAT2,SYK,LTBR,LYN,BST2,CD40,PIM2,TMEM189,OSM,ADRB2,HIF1A,CD80,EREG,ATP2C1,VEGFA,HIPK2,PEBP1,CD226,TWSG1,LITAF,ADA,SORBS3,CYP27B1,SHISA5,TGM2,CD4,THBS1,BMP2,IGF1,LGALS9,TRAF3IP2,P2RX4,IKBKE,P2RX7,NUP62,HTR2B	1307	294	13123	1.67343	0.793081	0.0292876	0.726827
GO:0002449~lymphocyte mediated immunity	18	1.06825	0.000393483	SERPING1,SLAMF7,LY9,PRDX1,C1QC,HLA-DMA,CD74,C1QA,C1QB,SLC11A1,C1RL,BCL3,FCER1G,INPP5D,C2,HSPD1,ERCC1,HLA-DRA	1307	70	13123	2.58186	0.794055	0.028838	0.728996
GO:0043068~positive regulation of programmed cell death	66	3.91691	0.000410529	PTGS2,ZMAT3,TLR2,TNFSF12,ITSN1,PTEN,PRDX1,RPS3,ARHGAP4,ACVR1B,NLRC4,TP53I3,APP,HTRA2,CD44,BOK,PCBP4,IL1B,NGFRAP1,NQO1,CASP1,KCNMA1,PRKCA,ARHGEF6,IFI16,MAPK1,CD38,ADRB2,HIPK2,RIPK3,SORT1,LRRK2,DCUN1D3,FGD2,GSDMA,ADORA2A,ADAMTSL4,GCH1,PLEKHG2,PPP2CA,ALDH1A3,PYCARD,TGM2,BCL3,PPP3CC,BCL6,DYRK2,INPP5D,RUNX3,PHLDA1,PLAGL2,ERCC2,IL2RA,CEBPB,SLAMF7,RPS6,ATM,P2RX7,CDKN1A,NUPR1,SMPD1,PPP1R13B,HSPD1,ID3,ABL…	1307	431	13123	1.53753	0.807683	0.02953	0.760462
GO:0007040~lysosome organization	10	0.593472	0.0004344	CLN3,TPP1,CHMP5,MYO7A,HPS4,GAA,ACP2,PPT1,CLN8,IDUA	1307	25	13123	4.01622	0.825267	0.0306715	0.804512
GO:0032496~response to lipopolysaccharide	19	1.1276	0.000443229	IRAK1,CCL2,PTGS2,LY96,SOCS3,SNCA,NFKBIA,GCH1,MAPK1,SLC11A1,P2RX7,CYP27B1,ADM,IL1B,SERPINA1,SCARB1,CD14,MGST1,ABCC5	1307	77	13123	2.47754	0.831355	0.0307448	0.8208
GO:0010942~positive regulation of cell death	66	3.91691	0.00046586	PTGS2,ZMAT3,TLR2,TNFSF12,ITSN1,PTEN,PRDX1,RPS3,ARHGAP4,ACVR1B,NLRC4,TP53I3,APP,HTRA2,CD44,BOK,PCBP4,IL1B,NGFRAP1,NQO1,CASP1,KCNMA1,PRKCA,ARHGEF6,IFI16,MAPK1,CD38,ADRB2,HIPK2,RIPK3,SORT1,LRRK2,DCUN1D3,FGD2,GSDMA,ADORA2A,ADAMTSL4,GCH1,PLEKHG2,PPP2CA,ALDH1A3,PYCARD,TGM2,BCL3,PPP3CC,BCL6,DYRK2,INPP5D,RUNX3,PHLDA1,PLAGL2,ERCC2,IL2RA,CEBPB,SLAMF7,RPS6,ATM,P2RX7,CDKN1A,NUPR1,SMPD1,PPP1R13B,HSPD1,ID3,ABL…	1307	433	13123	1.53043	0.846009	0.0317416	0.862538
GO:0010647~positive regulation of cell communication	53	3.1454	0.000467885	PTGS2,TBK1,SNCA,ITPKB,LPAR1,TLR6,ITSN1,CITED1,CITED2,ACVR1B,CLCF1,IL1B,TGFA,CAT,CASP1,AGPAT2,SYK,LTBR,BST2,LYN,CD40,PIM2,TMEM189,OSM,ADRB2,HIF1A,CD80,EREG,ATP2C1,HIPK2,VEGFA,PEBP1,CD226,TWSG1,CCL2,LITAF,ADORA2A,ADA,SORBS3,CYP27B1,SHISA5,TGM2,CD4,THBS1,BMP2,IGF1,LGALS9,TRAF3IP2,P2RX4,IKBKE,P2RX7,NUP62,HTR2B	1307	328	13123	1.62241	0.847257	0.0313457	0.866273
GO:0006928~cell motion	71	4.21365	0.000487131	MTSS1,NRP1,PTGS2,PDGFB,IL16,S100A9,WASF2,TNFSF12,CXCL12,PTEN,DSTN,CD97,APP,CXCR5,CD44,ANG,SPINT2,CXCR4,VNN1,IL1B,SEMA3A,VNN2,SYK,PRKCA,RET,EGR2,PTPRM,ARID5B,CCL4L1,CCL4L2,MYH9,MMP14,VASP,ELMO1,PLAUR,NDEL1,HIF1A,TNS1,BTG1,VCAN,LAMC1,ACVR1,ZFAND5,CCL3,CCL2,ENPP2,CALD1,VIM,ABI3,FPR1,FPR2,SRF,EPHB2,ALCAM,CD9,DOCK2,DNER,LHX2,PRSS3,DNAJA1,SCARB1,PPAP2A,THBS1,RUNX3,IL8,IGF1,PARP9,ITGA5,FYN,CXCL16,HBEGF,…	1307	475	13123	1.5008	0.85862	0.0320793	0.901753
GO:0046942~carboxylic acid transport	29	1.72107	0.000501538	SLC38A2,AQP9,SLC16A10,NFKBIE,CHKB,SLC38A7,PPARG,SLC38A6,SLC7A8,SLC7A5,SLC11A1,SLC1A5,FOLR2,SLC23A2,SERINC1,SLC22A5,ARL6IP5,SLC43A2,CLN3,PDPN,SLC3A2,SLC7A11,SLC16A3,SLC16A5,CD36,SLC16A6,SLC5A6,SLC38A1,CLN8	1307	146	13123	1.99436	0.86657	0.0324801	0.928305
GO:0051094~positive regulation of developmental process	46	2.72997	0.000559135	MSR1,PDLIM7,STAT5A,HPS4,PPARG,NFKB1,ITPKB,TNFSF12,IL7R,SRF,HLA-DMA,CD74,ADA,EPHB2,CCNE1,ACVR1B,CYP27B1,HLX,IL1B,VNN1,INPP5D,RUNX1,THBS1,IL1A,SYK,SH3PXD2B,PRKCA,BMP2,TESC,IL2RA,GIMAP5,LYN,SOCS3,SPHK1,ADRB2,P2RX7,NDEL1,HIF1A,CD36,NME1-NME2,SERPINF1,CD80,BTG1,NPTN,CA2,ACVR1	1307	275	13123	1.67951	0.894131	0.0355706	1.03439
GO:0015849~organic acid transport	29	1.72107	0.000562032	SLC38A2,AQP9,SLC16A10,NFKBIE,CHKB,SLC38A7,PPARG,SLC38A6,SLC7A8,SLC7A5,SLC11A1,SLC1A5,FOLR2,SLC23A2,SERINC1,SLC22A5,ARL6IP5,SLC43A2,CLN3,PDPN,SLC3A2,SLC7A11,SLC16A3,SLC16A5,CD36,SLC16A6,SLC5A6,SLC38A1,CLN8	1307	147	13123	1.98079	0.895356	0.0351942	1.03972
GO:0043065~positive regulation of apoptosis	65	3.85757	0.000570966	PTGS2,ZMAT3,TLR2,TNFSF12,ITSN1,PTEN,PRDX1,RPS3,ARHGAP4,ACVR1B,NLRC4,TP53I3,APP,HTRA2,CD44,BOK,PCBP4,IL1B,NGFRAP1,NQO1,CASP1,KCNMA1,PRKCA,ARHGEF6,IFI16,MAPK1,CD38,ADRB2,HIPK2,RIPK3,SORT1,DCUN1D3,FGD2,GSDMA,ADORA2A,ADAMTSL4,GCH1,PLEKHG2,PPP2CA,ALDH1A3,PYCARD,TGM2,BCL3,PPP3CC,BCL6,DYRK2,INPP5D,RUNX3,PHLDA1,PLAGL2,ERCC2,IL2RA,CEBPB,SLAMF7,RPS6,ATM,P2RX7,CDKN1A,NUPR1,SMPD1,PPP1R13B,HSPD1,ID3,ABL1,DAP3	1307	428	13123	1.52485	0.899045	0.0351952	1.05617
GO:0009165~nucleotide biosynthetic process	34	2.0178	0.0005901	ATP5D,ADCY3,NAMPT,KYNU,ADCY7,ATP1B3,ADORA2A,ATP5G2,KMO,CAD,ATP5G1,ADA,ATIC,C16ORF7,PAPSS1,ATP5I,ATP5H,IMPDH2,NAPRT1,DCTD,CECR1,ATP6V1H,PRPSAP1,AMPD3,NME4,ATP6V0E2,NME1-NME2,ADM,ATP2C1,ATP2A3,ATP6V0A1,PAICS,ATP6V0A2,ATP7B	1307	184	13123	1.85532	0.906515	0.0358041	1.09138
GO:0034097~response to cytokine stimulus	19	1.1276	0.000616108	PRKCA,IRAK2,IRAK1,KYNU,ADAM10,PTGS2,MCL1,SOCS3,SNCA,ACP5,SRF,GCH1,CCNE1,CD38,SLC11A1,AES,CYP27B1,CXCL16,SERPINA1	1307	79	13123	2.41482	0.915789	0.0367973	1.13922
GO:0016064~immunoglobulin mediated immune response	15	0.890208	0.000622249	SERPING1,LY9,C1QC,HLA-DMA,CD74,C1QA,C1QB,C1RL,BCL3,FCER1G,INPP5D,C2,HSPD1,ERCC1,HLA-DRA	1307	54	13123	2.78904	0.917842	0.036613	1.15051
GO:0055114~oxidation reduction	87	5.1632	0.000627755	CYB5R3,TM7SF2,LDHB,D2HGDH,LDHA,OXA1L,PTGS2,KCNAB1,CYP2S1,PTGS1,PGD,SNCA,IL4I1,PRDX5,OGDH,PRDX1,HIBADH,PECR,MTHFD2,TP53I3,IDH3G,P4HA2,P4HA1,VKORC1,AKR7A3,MICAL1,SMOX,CAT,NQO1,IMPDH2,SUOX,NCF4,TAZ,QDPR,CYP26A1,DHRS9,VAT1,SCCPDH,ADO,DHRS3,ALDH7A1,C5ORF4,UQCRH,PRDX6,CYBRD1,PCYOX1,SC5DL,SRXN1,CYP1B1,NDUFB7,ADHFE1,HSD17B14,KMO,FTH1,ALDH3A2,ALDH1A1,GPD1L,MTHFR,CYP27B1,AKR1A1,ALDH1A3,NMRAL1,IDH2,FASN,ERO…	1307	614	13123	1.42268	0.919639	0.0363979	1.16063
GO:0007626~locomotory behavior	45	2.67062	0.000699626	CXCL1,CCL1,CCL3,CCL2,CXCL5,IL16,PDGFB,ADORA2A,ENPP2,CXCL2,SNCA,S100A9,FPR1,NTAN1,CXCL6,FPR2,CXCL12,DOCK2,APP,CCL23,HTRA2,RAC2,CXCR4,CCL3L1,CCL3L3,IL1B,RALA,SEPP1,SEMA3A,GNG7,SYK,KCNMA1,PRKCA,PLP2,IL8,CCL4L1,CCL4L2,PLAUR,SOD2,MAPK1,CCL13,PPBP,CXCL16,HIPK2,GAA,CMTM7,CLN8	1307	270	13123	1.67343	0.939794	0.0399062	1.2927
GO:0044271~nitrogen compound biosynthetic process	51	3.02671	0.000892645	ATP5D,ADCY3,NAMPT,KYNU,TSPO,ATP1B3,ADCY7,SNCA,CAD,ASMTL,ATP5I,NQO1,ATP5H,IMPDH2,NAPRT1,PCBD1,CECR1,QDPR,ATP6V1H,NME4,ADM,ATP2C1,BCAT1,ADORA2A,KMO,ATP5G2,AZIN1,ATP5G1,ADA,GCH1,GPHN,ATIC,C16ORF7,PAPSS1,GCHFR,CEBPA,DCTD,ODC1,SHMT1,MAT2A,PRPSAP1,AMPD3,APRT,P2RX4,ATP6V0E2,NME1-NME2,ATP2A3,ATP6V0A1,PAICS,ATP6V0A2,ATP7B	1307	321	13123	1.59523	0.972279	0.0499327	1.64655
GO:0019724~B cell mediated immunity	15	0.890208	0.000921429	SERPING1,LY9,C1QC,HLA-DMA,CD74,C1QA,C1QB,C1RL,BCL3,FCER1G,INPP5D,C2,HSPD1,ERCC1,HLA-DRA	1307	56	13123	2.68943	0.975307	0.0507947	1.69921
GO:0045087~innate immune response	27	1.60237	0.00102965	KYNU,TBK1,PPARG,SNCA,NCF1C,TLR2,TLR5,TLR6,PRDX1,C1QC,TLR7,MIF,GCH1,SLC11A1,CYP27B1,CFH,VNN1,C2,CFD,F12,NCF1,SERPING1,SLAMF7,C1QA,C1QB,CYBB,CXCL16,C1RL	1307	138	13123	1.96446	0.984016	0.0558278	1.89697
GO:0050870~positive regulation of T cell activation	18	1.06825	0.00107665	IL2RA,GIMAP5,STAT5A,ITPKB,IL15,IL7R,HLA-DMA,ADA,CD74,TNFSF13B,CD80,HLX,IL1B,VNN1,CD4,HSPD1,EBI3,SYK	1307	76	13123	2.37803	0.986768	0.0575269	1.98276
GO:0050863~regulation of T cell activation	24	1.42433	0.00108261	IL2RA,GIMAP5,ADORA2A,STAT5A,TNFRSF14,ITPKB,IL15,IL7R,HLA-DMA,ADA,CD74,CBLB,TNFSF13B,CD80,HLX,IL1B,VNN1,CD4,BCL6,HSPD1,HLA-DOA,PAG1,EBI3,SYK	1307	117	13123	2.0596	0.98708	0.0570768	1.99362
GO:0046519~sphingoid metabolic process	13	0.771513	0.00114536	CLN3,PLA2G15,GM2A,SPHK1,LASS5,LASS6,P2RX7,P2RX1,ITGB8,PPP2CA,SMPD1,NSMAF,CLN8	1307	45	13123	2.9006	0.989961	0.0595062	2.10802
GO:0002252~immune effector process	26	1.54303	0.00117927	LY9,IL7R,C1QC,PRDX1,HLA-DMA,TLR7,CD74,SLC11A1,FCN1,CFH,FCER1G,BCL3,C2,INPP5D,CFD,ERCC1,LYN,SERPING1,SLAMF7,C1QA,TRAF3IP2,C1QB,TNFSF13B,C1RL,HSPD1,HLA-DRA	1307	132	13123	1.97768	0.99124	0.0604333	2.16979
GO:0006979~response to oxidative stress	30	1.78042	0.00126958	PTGS2,ATOX1,PTGS1,SNCA,PRDX5,PRDX1,ADA,SLC23A2,VNN1,CAT,SEPP1,NQO1,ETV5,ERCC1,ERCC2,NAPRT1,PRKCA,EPAS1,OLR1,GATM,MMP14,SOD2,CD38,HIF1A,MTF1,PRDX6,PEBP1,PRNP,CLN8,SRXN1	1307	162	13123	1.85936	0.993907	0.0640951	2.33409
GO:0032101~regulation of response to external stimulus	29	1.72107	0.0013238	PDGFB,IL16,PTGS2,ADORA2A,STAT5A,PPARG,CXCL12,ADA,CYP27B1,AOAH,VKORC1,TGM2,FCER1G,BCL6,THBS1,PRKCA,CLN3,F12,ADAM10,IL2RA,IL8,PDPN,SERPING1,TRIM24,OSM,ADRB2,NDEL1,SERPINF1,VEGFA	1307	155	13123	1.87855	0.9951	0.0659142	2.43263
GO:0002224~toll-like receptor signaling pathway	7	0.41543	0.00142647	IRAK2,IRAK1,TLR2,NFKBIA,HSPD1,TLR6,TLR7	1307	14	13123	5.02028	0.996757	0.0699796	2.61893
GO:0016192~vesicle-mediated transport	80	4.74777	0.00147102	NPEPL1,MSR1,PDLIM7,AP1G2,AP1B1,MARCKSL1,CHMP5,MYO7A,ATL3,SNCA,SORL1,WASF2,TRAPPC2L,ITSN1,RAB3IP,ASGR1,TRAPPC6A,APP,PICALM,PACSIN2,AP3B2,SCAMP1,CLN3,STX1A,LYN,ATP6V1H,ELMO1,LRPAP1,ADRB2,CD36,TRIM36,LRP10,STXBP5,TXNDC5,RAB5A,LRMP,SORT1,TOM1,RAB13,BIN1,ABCA7,CCL3,ARFGAP3,ADORA2A,CDC42SE1,PPT1,CLEC10A,FTH1,LLGL1,RIMS3,SLC11A1,DNER,OSBPL1A,FCN1,FCER1G,DOPEY2,SCARB1,STX11,EHD1,THBS1,RHOBTB3,OSBPL5,LRSA…	1307	571	13123	1.40673	0.997289	0.0712181	2.69968
GO:0010038~response to metal ion	25	1.48368	0.00151089	KCNMB3,ATP5D,D2HGDH,PTGS2,AQP9,SNCA,PTEN,SERPINA1,NDRG1,THBS1,MT1H,KCNMA1,CUTA,GATM,ITPR3,CAPN3,MT1X,P2RX7,MTF1,CYBRD1,PEBP1,CALM3,CA2,PRNP,ATP7B	1307	127	13123	1.97649	0.997691	0.0722083	2.77186
GO:0002253~activation of immune response	20	1.18694	0.00155951	IRAK2,IRAK1,LYN,TLR2,NFKBIA,CACNB3,SERPING1,TLR6,TLR7,C1QC,C1QA,MAPK1,C1QB,FYN,C1RL,CFH,C2,HSPD1,CFD,SYK	1307	92	13123	2.18273	0.998101	0.0735716	2.85985
GO:0006790~sulfur metabolic process	23	1.36499	0.00156722	TPST1,TPST2,GAL3ST4,NDST1,MAT2A,NDST2,STAT5A,IGF1,GSTT1,TPMT,DSE,SOD2,C4ORF31,MTHFR,SULF2,GSTK1,MCCC1,PEMT,CHST13,SEPP1,PAPSS1,PAPSS2,MGST1	1307	113	13123	2.04365	0.998159	0.0730644	2.87379
GO:0034341~response to interferon-gamma	6	0.356083	0.00159087	SLC11A1,KYNU,CYP27B1,CXCL16,SNCA,GCH1	1307	10	13123	6.02433	0.998326	0.0732767	2.91655
GO:0006878~cellular copper ion homeostasis	6	0.356083	0.00159087	APP,ATOX1,MT2A,PRNP,SCO2,ATP7B	1307	10	13123	6.02433	0.998326	0.0732767	2.91655
GO:0002443~leukocyte mediated immunity	19	1.1276	0.00174896	LYN,SERPING1,SLAMF7,LY9,PRDX1,C1QC,HLA-DMA,CD74,C1QA,C1QB,SLC11A1,C1RL,BCL3,FCER1G,INPP5D,C2,HSPD1,ERCC1,HLA-DRA	1307	86	13123	2.21826	0.999114	0.0793589	3.20195
GO:0055066~di-, tri-valent inorganic cation homeostasis	39	2.31454	0.00180643	CCL1,GNA15,CCL3,CCL2,WFS1,ATOX1,LPAR1,CXCL12,FTH1,SLC11A1,APP,CYP27B1,CCL23,NUBP1,CXCR4,SLC30A1,TGM2,IL1B,MT1H,SCO2,PRKCA,CLN3,HERPUD1,TTC7A,ACO1,FZD2,TRIM24,ITPR3,SOD2,CD38,HSP90B1,P2RX7,CCL13,ADM,ATP2C1,MT2A,PRNP,SLC40A1,ATP7B	1307	235	13123	1.6663	0.999296	0.0809469	3.3055
GO:0002824~positive regulation of adaptive immune response based on somatic recombination of immune receptors built from immunoglobulin superfamily domains	10	0.593472	0.00192648	SLC11A1,P2RX7,GIMAP5,TNFSF13B,PVRL2,FCER1G,IL1B,HSPD1,CD226,ADA	1307	30	13123	3.34685	0.999566	0.0851469	3.52147
GO:0030097~hemopoiesis	39	2.31454	0.00195219	TWSG1,MAEA,STAT5A,PPARG,ITPKB,IL15,IL7R,TPD52,HLA-DMA,CD74,ADA,TIMP1,DOCK2,CLCF1,BCL3,SH2B3,CD4,BCL6,RUNX1,ERCC1,ERCC2,SYK,CEBPA,GIMAP5,EPAS1,LYN,TTC7A,FLT3,TAZ,ROGDI,IFI16,OSTM1,MYH9,SOD2,DNASE2,RPL22,RPS14,VEGFA,IRF8	1307	236	13123	1.65924	0.999609	0.0852968	3.56766
GO:0006916~anti-apoptosis	35	2.07715	0.00199648	MEF2C,IER3,CCL2,MCL1,STAT5A,SNCA,NFKBIA,FOXO1,HSPA1A,NFKB1,HSPA1B,CITED2,CDKN2D,BAG3,COMP,TGM2,VNN1,IL1B,THBS1,IL1A,IRAK1,CEBPB,SOCS2,SOCS3,SPHK1,IGF1,PIM2,SOD2,ATF5,HSP90B1,TNFSF13B,TXNDC5,VEGFA,SERPINB2,TNFAIP3,PRNP	1307	205	13123	1.71424	0.999672	0.0862114	3.64719
GO:0008283~cell proliferation	63	3.73887	0.00204226	TSPO,PDGFB,LY86,IL15,CDC16,FES,PRDX1,PTEN,CXCL12,CITED1,CXCR4,CREG1,TGFA,IMPDH2,IL1A,MATK,SYK,BST2,PDPN,CD40,IFI16,PIM2,MXD1,MMP14,LRPAP1,OSM,VEGFB,NDEL1,SERPINF1,CCND3,EREG,TNFSF13B,TACSTD2,NAB2,VEGFA,BIN1,C6ORF108,CXCL1,BCAT1,ZMYND11,NDP,IL7R,FTH1,CD74,MIF,ZFP36L2,SLC11A1,DOCK2,PEMT,SCARB1,RUNX3,ERCC1,ERCC2,CRIP1,IL2RA,LIPA,SRA1,IGF1,APPL2,GAS6,P2RX7,FYN,HSPD1	1307	433	13123	1.46087	0.999728	0.0871655	3.72932
GO:0046634~regulation of alpha-beta T cell activation	11	0.652819	0.00208733	CBLB,GIMAP5,CD80,ADORA2A,HLX,ITPKB,BCL6,TNFRSF14,ADA,EBI3,SYK	1307	36	13123	3.06795	0.999773	0.0880691	3.81012
GO:0006672~ceramide metabolic process	12	0.712166	0.0021328	CLN3,P2RX7,PLA2G15,P2RX1,GM2A,ITGB8,PPP2CA,SMPD1,NSMAF,LASS5,LASS6,CLN8	1307	42	13123	2.86873	0.999811	0.0889685	3.89158
GO:0046651~lymphocyte proliferation	12	0.712166	0.0021328	SLC11A1,P2RX7,DOCK2,CCND3,CXCR4,FYN,IL15,HSPD1,CD40,IL7R,CXCL12,IMPDH2	1307	42	13123	2.86873	0.999811	0.0889685	3.89158
GO:0006665~sphingolipid metabolic process	17	1.0089	0.00217042	CLN3,PLA2G15,A4GALT,GM2A,SPHK1,PPT1,LASS5,LASS6,P2RX7,P2RX1,SMPDL3A,ITGB8,PPP2CA,SERINC1,SMPD1,NSMAF,CLN8	1307	74	13123	2.30661	0.999837	0.0895383	3.95891
GO:0006873~cellular ion homeostasis	55	3.26409	0.00239853	GNA15,WFS1,ATOX1,SNCA,LPAR1,CXCL12,MBP,APP,NUBP1,CXCR4,IL1B,KCNMA1,PRKCA,CLN3,EGR2,TTC7A,ACO1,ATP6V1H,CD38,ADM,ATP2C1,NAB2,NAB1,PRNP,PMP22,SLC40A1,KCNMB3,CCL1,CCL3,CCL2,ADORA2A,PPT1,FTH1,CD9,SLC11A1,CCL23,SLC30A1,TGM2,MT1H,SCO2,ERCC2,HERPUD1,GIMAP5,FZD2,AFG3L2,ITPR3,SOD2,P2RX4,P2RX7,HSP90B1,CCL13,ATP6V0E2,P2RX1,MT2A,ATP7B	1307	369	13123	1.49656	0.999935	0.0974858	4.36626
GO:0002821~positive regulation of adaptive immune response	10	0.593472	0.00247844	SLC11A1,P2RX7,GIMAP5,TNFSF13B,PVRL2,FCER1G,IL1B,HSPD1,CD226,ADA	1307	31	13123	3.23889	0.999953	0.0995643	4.50857
GO:0046456~icosanoid biosynthetic process	10	0.593472	0.00247844	PTGS2,ALOX5AP,PTGS1,LTA4H,LTC4S,CD74,RNPEP,MGST2,MIF,SYK	1307	31	13123	3.23889	0.999953	0.0995643	4.50857
GO:0007242~intracellular signaling cascade	154	9.13947	0.00267613	ADCY3,GNA15,RAB9A,ADCY7,TBK1,STAT5A,GNA12,TLR2,IQGAP2,ITPKB,LPAR1,TLR5,ITSN1,TLR6,TLR7,HMHA1,MAP3K6,GALR1,STAC,SPRED2,RALA,IL1B,SPRED1,MLL3,PAG1,RAB21,GNG7,SYK,RET,TNIK,SOCS2,SOCS3,CYP26A1,TANK,MARK2,MAPK1,RND3,CD36,RIPK3,AKAP7,RAB13,LRRK2,WNT5A,CCL2,GRAP,ADORA2A,PTPLAD1,MRAS,RAB40C,MAP4K1,NFKBIA,RUNDC3A,MYO9B,ASB13,AKAP11,CD74,RAB40B,CORO2A,RAC2,DNAJA1,DYRK2,CDC42EP4,CCM2,RAB8B,KLF9,MAP2K4,SPHK1…	1307	1245	13123	1.24196	0.999979	0.106021	4.85979
GO:0055070~copper ion homeostasis	6	0.356083	0.00267868	APP,ATOX1,MT2A,PRNP,SCO2,ATP7B	1307	11	13123	5.47666	0.999979	0.105083	4.86432
GO:0010035~response to inorganic substance	34	2.0178	0.0029536	ATP5D,KCNMB3,D2HGDH,AQP9,PTGS2,SNCA,PRDX5,PTEN,PRDX1,ADA,NDRG1,SERPINA1,CAT,THBS1,MT1H,CUTA,PRKCA,KCNMA1,GATM,OLR1,ITPR3,CAPN3,MT1X,SOD2,CDKN1A,P2RX7,MTF1,PRDX6,CYBRD1,CALM3,PEBP1,CA2,PRNP,ATP7B	1307	202	13123	1.68999	0.999993	0.114131	5.35069
GO:0001819~positive regulation of cytokine production	19	1.1276	0.00296696	GIMAP5,TLR2,CD40,TLR7,IFNAR1,SLC11A1,P2RX7,HIF1A,EREG,PYCARD,BCL3,IL1B,FCER1G,HSPD1,THBS1,CASP1,AGPAT2,CD14,IL1A	1307	90	13123	2.11967	0.999993	0.113528	5.37425
GO:0055080~cation homeostasis	44	2.61128	0.00300063	CCL1,GNA15,CCL3,CCL2,WFS1,ATOX1,SLC7A8,PPT1,LPAR1,CXCL12,FTH1,SLC11A1,APP,CYP27B1,CCL23,NUBP1,CXCR4,SLC30A1,TGM2,IL1B,MT1H,SCO2,KCNMA1,PRKCA,CLN3,HERPUD1,TTC7A,ACO1,ATP6V1H,FZD2,TRIM24,ITPR3,SOD2,CD38,P2RX7,HSP90B1,CCL13,ATP6V0E2,ADM,ATP2C1,MT2A,PRNP,SLC40A1,ATP7B	1307	282	13123	1.56661	0.999994	0.113662	5.43365
GO:0045597~positive regulation of cell differentiation	37	2.19585	0.00304094	MSR1,PDLIM7,STAT5A,PPARG,ITPKB,NFKB1,IL7R,SRF,HLA-DMA,ADA,CD74,EPHB2,CCNE1,ACVR1B,CYP27B1,HLX,VNN1,INPP5D,RUNX1,SYK,SH3PXD2B,BMP2,TESC,IL2RA,GIMAP5,LYN,SOCS3,NDEL1,HIF1A,CD36,NME1-NME2,SERPINF1,CD80,BTG1,NPTN,CA2,ACVR1	1307	226	13123	1.64381	0.999995	0.114027	5.50471
GO:0007249~I-kappaB kinase/NF-kappaB cascade	15	0.890208	0.00307097	IRAK2,IRAK1,TBK1,LY96,PTPLAD1,TLR2,G3BP2,NFKBIA,TLR5,TLR6,TLR7,TANK,RIPK3,BCL3,TRIP6	1307	63	13123	2.39061	0.999996	0.114026	5.5576
GO:0010883~regulation of lipid storage	8	0.474777	0.00315656	MSR1,CD36,PPARG,NFKBIA,PNPLA2,NFKB1,SCARB1,NR1H3	1307	21	13123	3.82497	0.999997	0.115948	5.70823
GO:0032943~mononuclear cell proliferation	12	0.712166	0.00317637	SLC11A1,P2RX7,DOCK2,CCND3,CXCR4,FYN,IL15,HSPD1,CD40,IL7R,CXCL12,IMPDH2	1307	44	13123	2.73833	0.999997	0.115579	5.74307
GO:0070661~leukocyte proliferation	12	0.712166	0.00317637	SLC11A1,P2RX7,DOCK2,CCND3,CXCR4,FYN,IL15,HSPD1,CD40,IL7R,CXCL12,IMPDH2	1307	44	13123	2.73833	0.999997	0.115579	5.74307
GO:0040008~regulation of growth	51	3.02671	0.00328016	NRP1,STAT5A,LGMN,IGFBP7,ZMAT3,PPARG,FGFRL1,ACVR1B,APP,AGPAT6,IDH3G,CD44,HTRA2,HLX,CDKN2D,CREG1,HTRA4,SEMA3A,SERTAD1,ADAM10,SOCS2,SOCS3,CSDA,CHPT1,VEGFB,OSM,CD38,ADRB2,CD320,BTG1,RUVBL1,DCUN1D3,C6ORF108,ABTB2,PPT1,CYP27B1,PPP2CA,BCL6,CRIM1,TMEM97,SPHK1,IGF1,TKT,AFG3L2,GAS6,CISH,CDKN1A,CXCL16,HBEGF,GAMT,PARP1	1307	341	13123	1.50167	0.999998	0.118062	5.92534
GO:0030003~cellular cation homeostasis	40	2.37389	0.00328338	CCL1,CCL3,GNA15,CCL2,WFS1,ATOX1,PPT1,LPAR1,CXCL12,FTH1,SLC11A1,APP,CCL23,NUBP1,CXCR4,SLC30A1,TGM2,IL1B,MT1H,SCO2,KCNMA1,PRKCA,CLN3,HERPUD1,TTC7A,ACO1,ATP6V1H,FZD2,ITPR3,CD38,HSP90B1,P2RX7,CCL13,ATP6V0E2,ADM,ATP2C1,MT2A,PRNP,SLC40A1,ATP7B	1307	251	13123	1.60009	0.999998	0.117124	5.93099
GO:0006959~humoral immune response	17	1.0089	0.00332085	PSMB10,ST6GAL1,CCL2,BST2,LY86,SERPING1,C1QC,TRAF3IP2,C1QA,C1QB,CFH,C1RL,BCL3,C2,TREM1,CFD,EBI3	1307	77	13123	2.21674	0.999998	0.117341	5.99671
GO:0042060~wound healing	32	1.89911	0.00336495	PDGFB,ADORA2A,F13A1,PABPC4,GNA12,MST1,SRF,FNTB,SLC11A1,CD9,DYSF,CD44,IL1B,SCARB1,SERPINA1,PAPSS2,F12,GATM,IGF1,SERPING1,CD40,PLAUR,NOTCH3,PLSCR1,HIF1A,CD36,P2RX1,EREG,ITGA5,SERPINB2,TFPI,HBEGF	1307	188	13123	1.70903	0.999999	0.117773	6.07402
GO:0055082~cellular chemical homeostasis	55	3.26409	0.00341001	GNA15,WFS1,ATOX1,SNCA,LPAR1,CXCL12,MBP,APP,NUBP1,CXCR4,IL1B,KCNMA1,PRKCA,CLN3,EGR2,TTC7A,ACO1,ATP6V1H,CD38,ADM,ATP2C1,NAB2,NAB1,PRNP,PMP22,SLC40A1,KCNMB3,CCL1,CCL3,CCL2,ADORA2A,PPT1,FTH1,CD9,SLC11A1,CCL23,SLC30A1,TGM2,MT1H,SCO2,ERCC2,HERPUD1,GIMAP5,FZD2,AFG3L2,ITPR3,SOD2,P2RX4,P2RX7,HSP90B1,CCL13,ATP6V0E2,P2RX1,MT2A,ATP7B	1307	375	13123	1.47261	0.999999	0.118228	6.15293
GO:0001817~regulation of cytokine production	31	1.83976	0.00358712	STAT5A,PPARG,TLR2,NFKB1,TLR6,TLR7,SLC11A1,PYCARD,FCER1G,IL1B,BCL3,CD4,BCL6,INPP5D,THBS1,CASP1,EBI3,SRGN,AGPAT2,IL1A,SYK,GIMAP5,CEBPB,CD40,IFNAR1,P2RX7,HIF1A,EREG,CD80,HSPD1,CD14	1307	181	13123	1.71965	0.999999	0.122927	6.46251
GO:0016265~death	94	5.57864	0.00371781	MEF2C,IER3,TSPO,MRPL41,ZMAT3,LY86,BSCL2,NFKB1,TNFSF12,ITSN1,PTEN,RPS3,ARHGAP4,NLRC4,APP,HTRA2,ANG,BOK,TPP1,CXCR4,CDKN2D,BAG3,IL1B,NGFRAP1,SEMA3A,CASP1,IL1A,CLN3,LTBR,ARHGEF6,TNFRSF14,PIM2,IL24,AHR,PNPLA6,ELMO1,DDIT4,OSM,PPM1F,EIF4G2,RNF130,ZDHHC16,ZFYVE26,HIPK2,RIPK3,TNFAIP3,CLN8,FGD2,TNFRSF21,GSDMA,GGCT,MCL1,LITAF,ADORA2A,ADAMTSL4,MMD,NFKBIA,PPT1,GRAMD4,FIS1,PLEKHG2,SHISA5,PYCARD,TGM2,PPP3CC,ZC3…	1307	714	13123	1.32187	1	0.126046	6.69032
GO:0010740~positive regulation of protein kinase cascade	29	1.72107	0.00372678	LITAF,TBK1,LPAR1,ITSN1,TLR6,SORBS3,CLCF1,SHISA5,TGM2,IL1B,CAT,CASP1,LTBR,BST2,LYN,IGF1,PIM2,CD40,TMEM189,LGALS9,TRAF3IP2,OSM,IKBKE,ADRB2,P2RX7,NUP62,ATP2C1,HIPK2,HTR2B	1307	166	13123	1.75407	1	0.125277	6.70594
GO:0050871~positive regulation of B cell activation	10	0.593472	0.00395378	CD38,CDKN1A,TNFSF13B,STAT5A,BCL6,TNFSF12,CD40,INPP5D,ADA,SYK	1307	33	13123	3.04259	1	0.131302	7.10035
GO:0030036~actin cytoskeleton organization	36	2.1365	0.00408145	FGD2,CXCL1,MTSS1,PDLIM7,PDGFB,MRAS,CALD1,S100A9,WASF2,MYO9B,LLGL1,DSTN,CDC42EP2,DOCK2,RAC2,PACSIN2,ANG,RALA,CNN2,BCL6,INF2,ACTN1,EVL,MYH9,CAPN3,VASP,ELMO1,EPB41L2,EPB41L3,RND3,ATP2C1,MYH11,TESK2,ABL1,ABL2,LCP1	1307	222	13123	1.6282	1	0.134147	7.32146
GO:0006091~generation of precursor metabolites and energy	45	2.67062	0.00410871	ATP5D,LDHB,OXA1L,LDHA,ECH1,GNPDA1,NDUFB7,SNCA,PGAM1,HK2,HK1,ATP5G2,ATP5G1,OGDH,IDH3G,IDH2,C16ORF7,CAT,ERO1L,ATP5I,ATP5H,GAPDH,COX17,CEBPA,NDUFA8,PFKL,SUCLG2,ACO1,TAZ,PFKP,ATP6V1H,CYB561,SOD2,SDHB,CYBB,ATP6V0E2,UQCRH,NDUFV1,NDUFV2,PGM1,GAA,CYBRD1,ATP6V0A1,ATP6V0A2,PYGB	1307	295	13123	1.53161	1	0.13389	7.36862
GO:0050801~ion homeostasis	58	3.44214	0.00418134	GNA15,ATOX1,WFS1,SNCA,SLC7A8,LPAR1,CXCL12,MBP,APP,NUBP1,CXCR4,IL1B,KCNMA1,PRKCA,CLN3,EGR2,TTC7A,ACO1,ATP6V1H,CD38,ADM,ATP2C1,NAB2,NAB1,PRNP,PMP22,SLC40A1,KCNMB3,CCL1,CCL3,CCL2,ADORA2A,PPT1,FTH1,CD9,SLC11A1,CYP27B1,CCL23,SLC30A1,TGM2,MT1H,SCO2,ERCC2,HERPUD1,GIMAP5,TRIM24,FZD2,ITPR3,AFG3L2,SOD2,P2RX4,P2RX7,HSP90B1,CCL13,ATP6V0E2,P2RX1,MT2A,ATP7B	1307	404	13123	1.44147	1	0.135002	7.49413
GO:0000165~MAPKKK cascade	31	1.83976	0.00423054	WNT5A,NDST1,PTPLAD1,FPR1,MAP4K1,ITPKB,LPAR1,CD74,MAP3K6,CXCR4,RB1CC1,PPP2CA,SPRED2,IL1B,TGFA,PRKAA1,SPRED1,THBS1,SYK,PRKCA,RET,CCM2,TNIK,ARHGEF6,MAP2K4,SHANK3,MAPK1,SH2D3C,P2RX7,LRRK2,DUSP6	1307	183	13123	1.70086	1	0.135397	7.57907
GO:0051186~cofactor metabolic process	32	1.89911	0.00428947	LDHB,NAMPT,KYNU,TSPO,PGD,PPT1,KMO,HIBADH,GCH1,MTHFD2,GPHN,AGPAT6,ACSS1,TP53I3,IDH3G,NUBP1,GSTK1,MCCC1,IDH2,VKORC1,VNN1,VNN2,VNN3,NAPRT1,SHMT1,SUCLG2,ACO1,GSTT1,SOD2,BLVRA,SDHB,MGST1	1307	191	13123	1.68219	1	0.136071	7.68068
GO:0010627~regulation of protein kinase cascade	39	2.31454	0.00435775	LITAF,TBK1,PTPLAD1,MAP4K1,LPAR1,TLR6,TIMP2,ITSN1,PRDX1,PTEN,MAP3K6,SORBS3,CLCF1,PPP2CA,SHISA5,TGM2,IL1B,CAT,CASP1,SYK,LTBR,BST2,LYN,IGF1,PIM2,CD40,TMEM189,LGALS9,OSM,TRAF3IP2,IKBKE,ADRB2,P2RX7,NUP62,ATP2C1,HIPK2,PEBP1,TNFAIP3,HTR2B	1307	247	13123	1.58535	1	0.137008	7.79831
GO:0008219~cell death	93	5.51929	0.00439754	MEF2C,IER3,TSPO,MRPL41,ZMAT3,LY86,BSCL2,NFKB1,TNFSF12,ITSN1,PTEN,RPS3,ARHGAP4,NLRC4,APP,HTRA2,ANG,BOK,TPP1,CXCR4,CDKN2D,BAG3,IL1B,NGFRAP1,SEMA3A,CASP1,IL1A,CLN3,LTBR,ARHGEF6,TNFRSF14,PIM2,IL24,AHR,PNPLA6,ELMO1,DDIT4,OSM,PPM1F,EIF4G2,RNF130,ZDHHC16,ZFYVE26,HIPK2,RIPK3,TNFAIP3,CLN8,FGD2,TNFRSF21,GSDMA,GGCT,MCL1,LITAF,ADORA2A,ADAMTSL4,MMD,NFKBIA,PPT1,GRAMD4,FIS1,PLEKHG2,SHISA5,PYCARD,TGM2,PPP3CC,ZC3…	1307	709	13123	1.31703	1	0.137102	7.86679
GO:0009152~purine ribonucleotide biosynthetic process	22	1.30564	0.00440404	ATP5D,ATP1B3,CECR1,ATP6V1H,ATP5G2,ATP5G1,AMPD3,ADA,NME4,ATP6V0E2,NME1-NME2,ATP2C1,ATIC,ATP2A3,ATP6V0A1,C16ORF7,ATP5I,PAICS,ATP5H,ATP6V0A2,IMPDH2,ATP7B	1307	115	13123	1.9208	1	0.136237	7.87798
GO:0002221~pattern recognition receptor signaling pathway	7	0.41543	0.00452694	IRAK2,IRAK1,TLR2,NFKBIA,HSPD1,TLR6,TLR7	1307	17	13123	4.13434	1	0.138706	8.08917
GO:0016052~carbohydrate catabolic process	21	1.24629	0.00456458	LDHB,LDHA,GNPDA1,PFKL,GM2A,GUSB,PGD,PGAM1,HK2,PFKP,HK1,CHI3L2,OGDH,HIBADH,GPD1L,AKR1A1,PGM1,GAA,CTBS,GAPDH,PYGB	1307	108	13123	1.95233	1	0.138723	8.15374
GO:0045089~positive regulation of innate immune response	12	0.712166	0.00459464	IRAK2,IRAK1,GIMAP5,EREG,STAT5A,PVRL2,TLR2,NFKBIA,HSPD1,TLR6,CD226,TLR7	1307	46	13123	2.61927	1	0.138528	8.2053
GO:0001890~placenta development	14	0.830861	0.00459995	CEBPA,CEBPB,PTGS2,EPAS1,NDP,PPARG,SPINT1,CITED1,ADA,CITED2,HIF1A,CYP27B1,ANG,PRDM1	1307	59	13123	2.3825	1	0.137648	8.2144
GO:0030005~cellular di-, tri-valent inorganic cation homeostasis	36	2.1365	0.00472111	CCL1,CCL3,GNA15,CCL2,WFS1,ATOX1,LPAR1,CXCL12,FTH1,SLC11A1,APP,CCL23,NUBP1,CXCR4,SLC30A1,TGM2,IL1B,MT1H,SCO2,PRKCA,CLN3,HERPUD1,TTC7A,ACO1,FZD2,ITPR3,CD38,CCL13,HSP90B1,P2RX7,ADM,ATP2C1,MT2A,PRNP,SLC40A1,ATP7B	1307	224	13123	1.61366	1	0.139976	8.42188
GO:0006164~purine nucleotide biosynthetic process	26	1.54303	0.0048538	ADCY3,ATP5D,ADCY7,ATP1B3,ADORA2A,ATP5G2,ATP5G1,ADA,ATIC,C16ORF7,ATP5I,ATP5H,IMPDH2,CECR1,ATP6V1H,AMPD3,NME4,ATP6V0E2,ADM,NME1-NME2,ATP2C1,ATP2A3,ATP6V0A1,PAICS,ATP6V0A2,ATP7B	1307	146	13123	1.78804	1	0.142576	8.64859
GO:0031349~positive regulation of defense response	16	0.949555	0.00490439	PRKCA,IRAK2,IRAK1,GIMAP5,STAT5A,TLR2,NFKBIA,TLR6,TLR7,OSM,EREG,PVRL2,TGM2,FCER1G,HSPD1,CD226	1307	73	13123	2.20067	1	0.142913	8.73488
GO:0006636~unsaturated fatty acid biosynthetic process	10	0.593472	0.00491123	PTGS2,ALOX5AP,PTGS1,LTA4H,LTC4S,CD74,RNPEP,MGST2,MIF,SYK	1307	34	13123	2.9531	1	0.142071	8.74655
GO:0019886~antigen processing and presentation of exogenous peptide antigen via MHC class II	5	0.296736	0.00492078	FCER1G,HLA-DOA,HLA-DMA,CD74,HLA-DRA	1307	8	13123	6.27534	1	0.141314	8.76283
GO:0002495~antigen processing and presentation of peptide antigen via MHC class II	5	0.296736	0.00492078	FCER1G,HLA-DOA,HLA-DMA,CD74,HLA-DRA	1307	8	13123	6.27534	1	0.141314	8.76283
GO:0006643~membrane lipid metabolic process	17	1.0089	0.0049325	CLN3,PLA2G15,A4GALT,GM2A,SPHK1,PPT1,LASS5,LASS6,P2RX7,P2RX1,SMPDL3A,ITGB8,PPP2CA,SERINC1,SMPD1,NSMAF,CLN8	1307	80	13123	2.13362	1	0.140625	8.78281
GO:0034220~ion transmembrane transport	12	0.712166	0.00547094	ATP5D,SLC11A1,ATP6V0E2,ATP6V1H,ATP6V0A1,ATP5G2,C16ORF7,ATP5G1,ATP5I,ATP5H,ATP6V0A2,ATP7B	1307	47	13123	2.56354	1	0.153686	9.69607
GO:0018212~peptidyl-tyrosine modification	12	0.712166	0.00547094	OSM,TPST1,TPST2,LYN,FYN,STAT5A,ABI3,FES,ABL1,ABL2,EPHB2,SYK	1307	47	13123	2.56354	1	0.153686	9.69607
GO:0006690~icosanoid metabolic process	12	0.712166	0.00547094	PTGR1,PTGS2,PDPN,ALOX5AP,PTGS1,LTA4H,LTC4S,CD74,RNPEP,MGST2,MIF,SYK	1307	47	13123	2.56354	1	0.153686	9.69607
GO:0051302~regulation of cell division	12	0.712166	0.00547094	OSM,VEGFB,BBS4,PPBP,PDGFB,EREG,VEGFA,CALM3,TGFA,IL1B,CAT,IL1A	1307	47	13123	2.56354	1	0.153686	9.69607
GO:0006793~phosphorus metabolic process	119	7.06231	0.0058412	STK33,TBK1,STAT5A,SNCA,LPAR1,PRKX,MAP3K6,APP,MAP3K8,IL1B,MLKL,STK39,MATK,SYK,RET,TNIK,PTPRM,TAZ,PIM2,MARK2,MAPK1,RIPK3,TESK2,LRRK2,CCL2,ENPP2,PTPLAD1,MAP4K1,ACP5,CD74,EPHB2,GPD1L,PTPLA,DYRK4,C16ORF7,DYRK2,PTPN6,BMP2,MAP2K4,DUSP23,PTPN13,PPA2,PTPN12,ATM,IKBKE,P2RX7,ATP6V0E2,NDUFV1,ULK3,NDUFV2,PTPN1,GK,MERTK,ABL1,PHPT1,ABL2,ATP5D,IMPA2,CAD,EIF2A,PMVK,FES,PTEN,ACVR1B,ADCK1,CXCR4,ACYP1,TGFA,CDK10,ATP…	1307	950	13123	1.25771	1	0.162095	10.3191
GO:0006796~phosphate metabolic process	119	7.06231	0.0058412	STK33,TBK1,STAT5A,SNCA,LPAR1,PRKX,MAP3K6,APP,MAP3K8,IL1B,MLKL,STK39,MATK,SYK,RET,TNIK,PTPRM,TAZ,PIM2,MARK2,MAPK1,RIPK3,TESK2,LRRK2,CCL2,ENPP2,PTPLAD1,MAP4K1,ACP5,CD74,EPHB2,GPD1L,PTPLA,DYRK4,C16ORF7,DYRK2,PTPN6,BMP2,MAP2K4,DUSP23,PTPN13,PPA2,PTPN12,ATM,IKBKE,P2RX7,ATP6V0E2,NDUFV1,ULK3,NDUFV2,PTPN1,GK,MERTK,ABL1,PHPT1,ABL2,ATP5D,IMPA2,CAD,EIF2A,PMVK,FES,PTEN,ACVR1B,ADCK1,CXCR4,ACYP1,TGFA,CDK10,ATP…	1307	950	13123	1.25771	1	0.162095	10.3191
GO:0019228~regulation of action potential in neuron	13	0.771513	0.00591655	KCNMA1,KCNMB3,EGR2,AFG3L2,MBP,CD9,P2RX4,P2RX7,P2RX1,NAB2,NAB1,PMP22,ERCC2	1307	54	13123	2.41717	1	0.162892	10.4453
GO:0045088~regulation of innate immune response	13	0.771513	0.00591655	IRAK2,IRAK1,GIMAP5,STAT5A,TLR2,NFKBIA,SERPING1,TLR6,TLR7,EREG,PVRL2,HSPD1,CD226	1307	54	13123	2.41717	1	0.162892	10.4453
GO:0048534~hemopoietic or lymphoid organ development	40	2.37389	0.00602768	TWSG1,MAEA,STAT5A,PPARG,ITPKB,IL15,IL7R,TPD52,HLA-DMA,CD74,ADA,TIMP1,DOCK2,CXCR5,CLCF1,BCL3,SH2B3,CD4,BCL6,RUNX1,ERCC1,ERCC2,SYK,CEBPA,GIMAP5,EPAS1,LYN,TTC7A,FLT3,TAZ,ROGDI,OSTM1,IFI16,MYH9,SOD2,DNASE2,RPL22,RPS14,VEGFA,IRF8	1307	260	13123	1.5447	1	0.164571	10.6313
GO:0048878~chemical homeostasis	69	4.09496	0.00608059	GNA15,AQP9,ATOX1,WFS1,PPARG,SNCA,SLC7A8,LPAR1,CXCL12,MBP,APP,NUBP1,CXCR4,IL1B,IDUA,KCNMA1,PRKCA,CLN3,EGR2,TTC7A,ACO1,ATP6V1H,CD38,HIF1A,ADM,ATP2C1,NAB2,NAB1,VEGFA,PRNP,PMP22,SLC40A1,CCL1,KCNMB3,CCL3,CCL2,ADORA2A,SLC37A4,PPT1,FTH1,CD9,SLC11A1,CCL23,CYP27B1,SLC30A1,TGM2,SCARB1,MT1H,SCO2,ERCC2,HERPUD1,GIMAP5,EPAS1,IGF1,TRIM24,FZD2,ITPR3,AFG3L2,RPS6,SOD2,P2RX4,P2RX7,HSP90B1,CCL13,ATP6V0E2,P2RX1,PLSCR…	1307	506	13123	1.36917	1	0.16478	10.7197
GO:0009636~response to toxin	14	0.830861	0.00619442	PRKCA,PTGR1,CES1,LYN,SLC7A8,EPHX1,BPHL,SRF,SLC7A11,CDKN1A,NUPR1,PEBP1,NQO1,MT1H	1307	61	13123	2.30439	1	0.166483	10.9096
GO:0033198~response to ATP	6	0.356083	0.00629901	P2RX4,P2RX7,P2RX1,IL1B,CASP1,PTEN	1307	13	13123	4.6341	1	0.167935	11.0837
GO:0050727~regulation of inflammatory response	16	0.949555	0.00637191	PRKCA,F12,IL2RA,PTGS2,ADORA2A,STAT5A,PPARG,SERPING1,ADA,OSM,ADRB2,SERPINF1,AOAH,TGM2,FCER1G,BCL6	1307	75	13123	2.14198	1	0.168597	11.2049
GO:0006812~cation transport	73	4.33234	0.00638294	ATP5D,KCNJ15,SLC44A1,ATP1B3,KCNAB1,ATOX1,KCNJ12,KCNK12,SHKBP1,SLC23A2,MCOLN1,SLC22A5,ATP5I,KCNQ2,COX17,ATP5H,NSF,KCNMA1,SLC3A2,ATP6V1H,KCTD20,TCN2,PKD2L1,TMEM38B,ATP2C1,SLC41A2,SLC38A1,SLC40A1,KCNMB3,ORAI1,SLC38A2,CHKB,SLC38A7,CAMK2G,FKBP4,SLC38A6,SFXN4,CACNB3,ATP5G2,ATP6V1G2,ATP5G1,KCNJ2,FTH1,TPCN1,SFXN5,TMEM37,SLC11A1,CYP27B1,SLC30A1,SLC39A8,C16ORF7,SLC30A2,SLC30A3,SLC31A2,SLC39A3,SCO2,ITPR3,CA…	1307	542	13123	1.35233	1	0.167765	11.2232
GO:0007610~behavior	64	3.79822	0.00644071	PTGS2,PDGFB,IL16,GM2A,WFS1,SNCA,S100A9,PTEN,CXCL12,APP,HTRA2,CXCR4,CCL3L1,CCL3L3,IL1B,RALA,SEPP1,SEMA3A,GNG7,SYK,KCNMA1,PRKCA,CLN3,EGR2,CCL4L1,CCL4L2,PLAUR,OSM,MAPK1,PPBP,HIPK2,GAA,PEBP1,CLN8,CXCL1,CCL1,BBS4,CCL3,CCL2,CXCL5,ADORA2A,ENPP2,CXCL2,FPR1,NTAN1,FPR2,CXCL6,ADA,EPHB2,PLCL1,DOCK2,CCL23,RAC2,ACSL4,PLP2,IL8,MAOA,VDAC3,APRT,SOD2,CCL13,PENK,FYN,ITGA5,CXCL16,CMTM7	1307	464	13123	1.3849	1	0.168059	11.3191
GO:0051604~protein maturation	22	1.30564	0.00660398	CLN3,F12,WFS1,SERPING1,MMP14,C1QC,C1QA,C1QB,P2RX7,DISP1,DNER,PRSS3,C1RL,CFH,SCG5,C2,HSPD1,CFD,PARP1,CASP1,PCSK5,SRGN	1307	119	13123	1.85624	1	0.170842	11.5897
GO:0008284~positive regulation of cell proliferation	58	3.44214	0.00664404	NAMPT,NRP1,PTGS2,PDGFB,MARCKSL1,STAT5A,IL15,TNFSF12,FNTB,ANG,HLX,IL1B,TGFA,SERTAD1,EBI3,MATK,SYK,PRKCA,ADAM10,LYN,CD40,RPS4X,CDK4,MMP12,VEGFB,OSM,MAPK1,CD38,ADRB2,HIF1A,ADM,CD80,EREG,TNFSF13B,GRN,HIPK2,VEGFA,LAMC1,CCL2,CXCL5,ADA,TIMP1,RAC2,TGM2,BCL6,ODC1,IL2RA,FLT3,SPHK1,RPS9,ROGDI,IGF1,SLAMF1,C19ORF10,CDKN1A,ATF3,NME1-NME2,HBEGF	1307	413	13123	1.41005	1	0.170694	11.6559
GO:0030029~actin filament-based process	37	2.19585	0.00664592	FGD2,CXCL1,MTSS1,PDLIM7,PDGFB,MRAS,CALD1,MYO7A,S100A9,WASF2,MYO9B,LLGL1,DSTN,CDC42EP2,DOCK2,RAC2,PACSIN2,ANG,RALA,CNN2,BCL6,INF2,ACTN1,EVL,MYH9,CAPN3,VASP,ELMO1,EPB41L2,EPB41L3,RND3,ATP2C1,MYH11,TESK2,ABL1,ABL2,LCP1	1307	237	13123	1.56751	1	0.16966	11.6591
GO:0043123~positive regulation of I-kappaB kinase/NF-kappaB cascade	19	1.1276	0.00676164	LTBR,BST2,LITAF,TBK1,PIM2,CD40,LPAR1,TMEM189,TLR6,LGALS9,TRAF3IP2,IKBKE,NUP62,ATP2C1,SHISA5,TGM2,IL1B,CASP1,HTR2B	1307	97	13123	1.96671	1	0.171272	11.8502
GO:0050671~positive regulation of lymphocyte proliferation	13	0.771513	0.00689897	IL2RA,STAT5A,CD40,IL15,ADA,CD38,CDKN1A,CD80,TNFSF13B,IL1B,BCL6,EBI3,SYK	1307	55	13123	2.37322	1	0.173354	12.0765
GO:0006732~coenzyme metabolic process	26	1.54303	0.00690305	LDHB,NAMPT,KYNU,PGD,KMO,HIBADH,GCH1,MTHFD2,GPHN,ACSS1,TP53I3,AGPAT6,IDH3G,GSTK1,IDH2,VNN1,VNN2,VNN3,NAPRT1,SHMT1,SUCLG2,ACO1,GSTT1,SOD2,SDHB,MGST1	1307	150	13123	1.74036	1	0.172376	12.0832
GO:0006119~oxidative phosphorylation	17	1.0089	0.00712999	ATP5D,NDUFA8,NDUFB7,SNCA,TAZ,ATP6V1H,ATP5G2,ATP5G1,ATP6V0E2,UQCRH,NDUFV1,NDUFV2,ATP6V0A1,C16ORF7,ATP5I,ATP5H,ATP6V0A2	1307	83	13123	2.0565	1	0.176439	12.456
GO:0051051~negative regulation of transport	24	1.42433	0.00714536	PRKCA,SERGEF,LRSAM1,PFKL,PTGS2,NFKBIE,SNCA,PTGS1,G3BP2,APOC1,NFKBIA,NFKB1,MXI1,PTEN,ADA,OSM,ADRB2,PACSIN2,CALM3,IL1B,THBS1,ARL6IP5,SRGN,NR1H3	1307	135	13123	1.78499	1	0.17571	12.4811
GO:0001892~embryonic placenta development	8	0.474777	0.00720814	CEBPA,HIF1A,CEBPB,EPAS1,SPINT1,PRDM1,CITED1,CITED2	1307	24	13123	3.34685	1	0.176043	12.584
GO:0009150~purine ribonucleotide metabolic process	24	1.42433	0.00781364	ATP5D,ATP1B3,CECR1,ATP6V1H,MYO9B,ATP5G2,ATP5G1,AMPD3,ADA,GCH1,NME4,ATP6V0E2,NME1-NME2,ATP2C1,ATIC,ATP2A3,ATP6V0A1,C16ORF7,ATP5I,PAICS,ATP5H,ATP6V0A2,IMPDH2,ATP7B	1307	136	13123	1.77186	1	0.188261	13.5698
GO:0032946~positive regulation of mononuclear cell proliferation	13	0.771513	0.00800539	IL2RA,STAT5A,CD40,IL15,ADA,CD38,CDKN1A,CD80,TNFSF13B,IL1B,BCL6,EBI3,SYK	1307	56	13123	2.33084	1	0.191285	13.8799
GO:0070665~positive regulation of leukocyte proliferation	13	0.771513	0.00800539	IL2RA,STAT5A,CD40,IL15,ADA,CD38,CDKN1A,CD80,TNFSF13B,IL1B,BCL6,EBI3,SYK	1307	56	13123	2.33084	1	0.191285	13.8799
GO:0002764~immune response-regulating signal transduction	13	0.771513	0.00800539	IRAK2,IRAK1,LYN,TLR2,NFKBIA,CACNB3,CD40,TLR6,TLR7,MAPK1,FYN,HSPD1,SYK	1307	56	13123	2.33084	1	0.191285	13.8799
GO:0043122~regulation of I-kappaB kinase/NF-kappaB cascade	20	1.18694	0.00802219	LTBR,BST2,LITAF,TBK1,PIM2,CD40,LPAR1,TMEM189,TLR6,LGALS9,TRAF3IP2,IKBKE,NUP62,ATP2C1,SHISA5,TGM2,IL1B,TNFAIP3,CASP1,HTR2B	1307	106	13123	1.89444	1	0.190522	13.907
GO:0051235~maintenance of location	14	0.830861	0.00820015	BBS4,NFKBIE,TLN2,G3BP2,NFKBIA,MXI1,FTH1,SLC17A7,HSP90B1,GAA,BCL3,IL1B,SRGN,ATP7B	1307	63	13123	2.23123	1	0.193193	14.1937
GO:0002758~innate immune response-activating signal transduction	7	0.41543	0.00834637	IRAK2,IRAK1,TLR2,NFKBIA,HSPD1,TLR6,TLR7	1307	19	13123	3.69915	1	0.195155	14.4285
GO:0002218~activation of innate immune response	7	0.41543	0.00834637	IRAK2,IRAK1,TLR2,NFKBIA,HSPD1,TLR6,TLR7	1307	19	13123	3.69915	1	0.195155	14.4285
GO:0045058~T cell selection	7	0.41543	0.00834637	DOCK2,ITPKB,CD4,IL15,HLA-DMA,CD74,SYK	1307	19	13123	3.69915	1	0.195155	14.4285
GO:0006163~purine nucleotide metabolic process	30	1.78042	0.00845351	ATP5D,ADCY3,ADCY7,ATP1B3,ADORA2A,ATP5G2,MYO9B,ATP5G1,ADA,GCH1,ATIC,C16ORF7,PAPSS1,ATP5I,ATP5H,IMPDH2,CECR1,ATP6V1H,PDE4D,AMPD3,NME4,ATP6V0E2,ADM,NME1-NME2,ATP2C1,ATP2A3,ATP6V0A1,PAICS,ATP6V0A2,ATP7B	1307	184	13123	1.63705	1	0.196272	14.6002
GO:0012501~programmed cell death	79	4.68843	0.00852172	MEF2C,IER3,TSPO,MRPL41,ZMAT3,LY86,NFKB1,TNFSF12,ITSN1,PTEN,RPS3,ARHGAP4,NLRC4,APP,HTRA2,BOK,CXCR4,CDKN2D,BAG3,IL1B,NGFRAP1,SEMA3A,CASP1,IL1A,LTBR,ARHGEF6,TNFRSF14,IL24,PIM2,AHR,ELMO1,DDIT4,OSM,PPM1F,RNF130,ZDHHC16,HIPK2,RIPK3,TNFAIP3,FGD2,TNFRSF21,GSDMA,GGCT,LITAF,MCL1,ADORA2A,ADAMTSL4,NFKBIA,PPT1,GRAMD4,FIS1,PLEKHG2,SHISA5,TGM2,PYCARD,PPP3CC,ZC3H12A,DYRK2,INPP5D,THBS1,BMF,SRGN,ERCC2,PHLDA1,PTPN6…	1307	602	13123	1.31761	1	0.196567	14.7094
GO:0009259~ribonucleotide metabolic process	25	1.48368	0.00872237	ATP5D,ATP1B3,MYO9B,ATP5G2,ATP5G1,ADA,GCH1,ATIC,C16ORF7,ENTPD4,ATP5I,ATP5H,IMPDH2,CECR1,ATP6V1H,AMPD3,NME4,ATP6V0E2,NME1-NME2,ATP2C1,ATP2A3,ATP6V0A1,PAICS,ATP6V0A2,ATP7B	1307	145	13123	1.73113	1	0.199581	15.0297
GO:0009260~ribonucleotide biosynthetic process	22	1.30564	0.00878622	ATP5D,ATP1B3,CECR1,ATP6V1H,ATP5G2,ATP5G1,AMPD3,ADA,NME4,ATP6V0E2,NME1-NME2,ATP2C1,ATIC,ATP2A3,ATP6V0A1,C16ORF7,ATP5I,PAICS,ATP5H,ATP6V0A2,IMPDH2,ATP7B	1307	122	13123	1.81059	1	0.199762	15.1314
GO:0051789~response to protein stimulus	20	1.18694	0.00887074	HSP90AB1,F12,HERPUD1,LYN,AARS,HSPA1A,HSPA1B,TTC3,CD48,HSPH1,P2RX7,HSPA2,DNAJA1,CREB3L2,CD4,ID3,DNAJB1,HSPD1,ERO1L,NFE2L2,DNAJB6	1307	107	13123	1.87674	1	0.20036	15.2658
GO:0030595~leukocyte chemotaxis	10	0.593472	0.0088823	PRKCA,DOCK2,CCL2,IL8,IL16,PDGFB,CXCL16,S100A9,IL1B,SYK	1307	37	13123	2.71366	1	0.199481	15.2842
GO:0009968~negative regulation of signal transduction	34	2.0178	0.00893017	TWSG1,SNX6,EZH2,NFKBIA,PTEN,CITED1,ADA,RGS10,RGS12,PPP2CA,IL1B,BCL6,INPP5D,THBS1,PRKCA,SOCS2,SOCS3,CYP26A1,RGS18,RGS16,CISH,DDIT4,ADRB2,P2RX7,CBLB,RGS1,NUP62,RGS2,HIPK2,PEBP1,PTPN1,TNFAIP3,ACVR1,TOB1	1307	217	13123	1.57317	1	0.19934	15.3602
GO:0048872~homeostasis of number of cells	19	1.1276	0.00929226	MAEA,LIPA,GIMAP5,IL2RA,LYN,EPAS1,STAT5A,IL7R,PRDX1,TIMP1,DNASE2,P2RX7,TNFSF13B,RPS17,RPS14,VEGFA,BCL6,SLC22A5,ERCC2	1307	100	13123	1.9077	1	0.205432	15.9333
GO:0032103~positive regulation of response to external stimulus	14	0.830861	0.00937815	PRKCA,ADAM10,PDGFB,IL16,IL8,STAT5A,CXCL12,OSM,CYP27B1,NDEL1,VEGFA,TGM2,FCER1G,THBS1	1307	64	13123	2.19637	1	0.206004	16.0687
GO:0006917~induction of apoptosis	46	2.72997	0.00960169	FGD2,GSDMA,ADORA2A,ZMAT3,TLR2,TNFSF12,ITSN1,PTEN,PRDX1,GCH1,RPS3,ARHGAP4,ACVR1B,PLEKHG2,TP53I3,APP,HTRA2,BOK,PCBP4,PPP2CA,TGM2,PYCARD,BCL3,NGFRAP1,DYRK2,CASP1,RUNX3,PLAGL2,ERCC2,PHLDA1,PRKCA,CEBPB,ARHGEF6,IFI16,SLAMF7,ATM,MAPK1,CD38,CDKN1A,NUPR1,HIPK2,RIPK3,SORT1,PPP1R13B,ABL1,DAP3	1307	318	13123	1.45241	1	0.209247	16.4201
GO:0002520~immune system development	41	2.43323	0.0096995	TWSG1,MAEA,STAT5A,PPARG,ITPKB,IL15,IL7R,TPD52,HLA-DMA,CD74,ADA,TIMP1,DOCK2,CXCR5,CLCF1,BCL3,SH2B3,CD4,BCL6,RUNX1,ERCC1,ERCC2,SYK,CEBPA,GIMAP5,EPAS1,LYN,TTC7A,FLT3,TAZ,ROGDI,OSTM1,IFI16,MYH9,SOD2,DNASE2,RPL22,RPS14,VEGFA,IRF8,HSPD1	1307	276	13123	1.49153	1	0.210017	16.5734
GO:0016477~cell migration	41	2.43323	0.0096995	ZFAND5,NRP1,CCL2,IL16,PDGFB,WASF2,S100A9,TNFSF12,SRF,PTEN,CXCL12,DOCK2,CD44,CXCR4,ANG,DNER,PRSS3,IL1B,SCARB1,PPAP2A,THBS1,SYK,PRKCA,RET,IL8,ARID5B,MYH9,MMP14,NDEL1,TNS1,HIF1A,PARP9,FYN,BTG1,ITGA5,CXCL16,HBEGF,VCAN,LRP8,LAMC1,ACVR1	1307	276	13123	1.49153	1	0.210017	16.5734
GO:0001558~regulation of cell growth	31	1.83976	0.00976015	NRP1,ABTB2,IGFBP7,FGFRL1,PPARG,PPT1,ACVR1B,CYP27B1,CD44,CDKN2D,PPP2CA,BCL6,HTRA4,SEMA3A,CRIM1,SERTAD1,TMEM97,ADAM10,SOCS2,SPHK1,CHPT1,CISH,VEGFB,CD38,CDKN1A,CD320,BTG1,CXCL16,HBEGF,DCUN1D3,C6ORF108	1307	194	13123	1.60442	1	0.210066	16.6684
GO:0051240~positive regulation of multicellular organismal process	37	2.19585	0.00980282	CCL2,PTGS2,ADORA2A,STAT5A,PTGS1,SNCA,TLR2,SRF,TLR7,ADA,SLC11A1,VKORC1,PYCARD,BCL3,FCER1G,IL1B,SLC22A5,CASP1,THBS1,AGPAT2,IL1A,F12,BMP2,GIMAP5,SPHK1,CD40,IFNAR1,CD38,ADRB2,P2RX7,HIF1A,EREG,ADM,CA2,HSPD1,CD14,ACVR1	1307	243	13123	1.52881	1	0.20977	16.7351
GO:0012502~induction of programmed cell death	46	2.72997	0.0101379	FGD2,GSDMA,ADORA2A,ZMAT3,TLR2,TNFSF12,ITSN1,PTEN,PRDX1,GCH1,RPS3,ARHGAP4,ACVR1B,PLEKHG2,TP53I3,APP,HTRA2,BOK,PCBP4,PPP2CA,TGM2,PYCARD,BCL3,NGFRAP1,DYRK2,CASP1,RUNX3,PLAGL2,ERCC2,PHLDA1,PRKCA,CEBPB,ARHGEF6,IFI16,SLAMF7,ATM,MAPK1,CD38,CDKN1A,NUPR1,HIPK2,RIPK3,SORT1,PPP1R13B,ABL1,DAP3	1307	319	13123	1.44785	1	0.215006	17.2574
GO:0001525~angiogenesis	25	1.48368	0.0102975	NRP1,WASF2,TNFSF12,CXCL12,PTEN,SRF,ARHGAP22,ANG,CXCR4,IL1B,ZC3H12A,TGFA,THBS1,IL8,EPAS1,MMP19,MMP14,MYH9,NCL,PNPLA6,HIF1A,EREG,VEGFA,TNFAIP2,ACVR1	1307	147	13123	1.70758	1	0.216875	17.505
GO:0033559~unsaturated fatty acid metabolic process	12	0.712166	0.0103621	PTGR1,PTGS2,PDPN,ALOX5AP,PTGS1,LTA4H,LTC4S,CD74,RNPEP,MGST2,MIF,SYK	1307	51	13123	2.36248	1	0.216956	17.6051
GO:0010648~negative regulation of cell communication	37	2.19585	0.0104333	TWSG1,PTGS2,SNX6,EZH2,NFKBIA,PTEN,CITED1,ADA,RGS10,RGS12,PPP2CA,IL1B,BCL6,INPP5D,THBS1,PRKCA,CLN3,SOCS2,SOCS3,CYP26A1,RGS18,RGS16,CISH,DDIT4,CD38,ADRB2,P2RX7,CBLB,RGS1,NUP62,RGS2,HIPK2,PEBP1,PTPN1,TNFAIP3,ACVR1,TOB1	1307	244	13123	1.52254	1	0.217158	17.7152
GO:0015986~ATP synthesis coupled proton transport	10	0.593472	0.0106361	ATP5D,ATP6V0E2,ATP6V1H,ATP6V0A1,ATP5G2,C16ORF7,ATP5G1,ATP5I,ATP5H,ATP6V0A2	1307	38	13123	2.64225	1	0.219769	18.0281
GO:0015985~energy coupled proton transport, down electrochemical gradient	10	0.593472	0.0106361	ATP5D,ATP6V0E2,ATP6V1H,ATP6V0A1,ATP5G2,C16ORF7,ATP5G1,ATP5I,ATP5H,ATP6V0A2	1307	38	13123	2.64225	1	0.219769	18.0281
GO:0051260~protein homooligomerization	18	1.06825	0.0107664	CUTA,SHMT1,PCBD1,IDE,ATL3,PFKP,ITPR3,SOD2,MIF,RAD51,GCH1,P2RX4,P2RX1,C1QTNF1,ALOX5AP,TGM2,PEBP1,PRNP	1307	94	13123	1.92266	1	0.221026	18.2286
GO:0006576~biogenic amine metabolic process	18	1.06825	0.0107664	ODC1,KYNU,PLA2G15,EPAS1,CHKB,MAOA,SNCA,KMO,AZIN1,CHPT1,PNPLA6,GCH1,AGPAT6,SULT1A1,ASMTL,SULT1A3,PEMT,SMOX,SULT1A4	1307	94	13123	1.92266	1	0.221026	18.2286
GO:0002526~acute inflammatory response	18	1.06825	0.0107664	F12,CEBPB,LYN,SERPING1,C1QC,C1QA,C1QB,NUPR1,P2RX1,CFH,C1RL,IL1B,VNN1,SERPINA1,C2,CFD,IL1A,ACVR1	1307	94	13123	1.92266	1	0.221026	18.2286
GO:0007568~aging	20	1.18694	0.0107841	PRKCA,LIMS1,SOCS2,SOCS3,PTGS1,IL15,SRF,PTEN,ADA,SOD2,C1QB,NUP62,ADM,PEBP1,IL1B,CTSC,INPP5D,CLN8,ERCC1,ERCC2	1307	109	13123	1.8423	1	0.220234	18.2558
GO:0051181~cofactor transport	7	0.41543	0.0109379	P2RX7,FOLR2,PDPN,CHKB,PPT1,SLC5A6,SLC22A5	1307	20	13123	3.51419	1	0.221896	18.4917
GO:0070482~response to oxygen levels	24	1.42433	0.0110159	KCNMA1,CCL2,EPAS1,PDGFB,PDPN,SOCS3,MMP14,ADA,SOD2,DDIT4,CITED2,CD38,HSP90B1,CDKN1A,HIF1A,ADM,CXCR4,ANG,VEGFA,ALDH2,SERPINA1,PRKAA1,CASP1,THBS1	1307	140	13123	1.72124	1	0.222186	18.6112
GO:0045766~positive regulation of angiogenesis	8	0.474777	0.0114913	HIF1A,BTG1,SPHK1,IL1B,TNFSF12,RUNX1,THBS1,IL1A	1307	26	13123	3.0894	1	0.229488	19.3354
GO:0031100~organ regeneration	8	0.474777	0.0114913	CCNE1,CDKN1A,CCL2,ADM,SOCS3,ATIC,PPARG,GAS6	1307	26	13123	3.0894	1	0.229488	19.3354
GO:0006915~apoptosis	77	4.56973	0.0117557	MEF2C,IER3,TSPO,MRPL41,ZMAT3,LY86,NFKB1,TNFSF12,ITSN1,PTEN,RPS3,ARHGAP4,NLRC4,APP,HTRA2,BOK,CXCR4,BAG3,IL1B,NGFRAP1,SEMA3A,CASP1,IL1A,LTBR,ARHGEF6,TNFRSF14,IL24,PIM2,AHR,ELMO1,DDIT4,OSM,PPM1F,RNF130,ZDHHC16,HIPK2,RIPK3,TNFAIP3,FGD2,TNFRSF21,GSDMA,GGCT,LITAF,MCL1,ADORA2A,ADAMTSL4,NFKBIA,PPT1,GRAMD4,FIS1,PLEKHG2,SHISA5,PYCARD,PPP3CC,ZC3H12A,DYRK2,INPP5D,THBS1,BMF,SRGN,ERCC2,PHLDA1,PTPN6,RNF144B,IL2…	1307	593	13123	1.30375	1	0.232982	19.7357
GO:0042327~positive regulation of phosphorylation	18	1.06825	0.011934	PRKCA,BMP2,LYN,IGF1,TNFRSF14,OSM,P2RX7,EREG,CD80,CCND3,ANG,CLCF1,RB1CC1,IL1B,CD4,FAM129A,THBS1,SYK	1307	95	13123	1.90242	1	0.234935	20.0044
GO:0002757~immune response-activating signal transduction	12	0.712166	0.0119926	IRAK2,IRAK1,MAPK1,LYN,FYN,TLR2,NFKBIA,CACNB3,HSPD1,TLR6,TLR7,SYK	1307	52	13123	2.31705	1	0.234811	20.0927
GO:0033273~response to vitamin	14	0.830861	0.0121279	MUC1,BMP2,KYNU,CCL2,PTGS2,IGFBP7,PPARG,CCNE1,CD38,CYP27B1,CD44,CDKN2D,PEMT,IL1B	1307	66	13123	2.12981	1	0.235995	20.2957
GO:0006825~copper ion transport	6	0.356083	0.0124196	ATOX1,FKBP4,SLC31A2,COX17,SCO2,ATP7B	1307	15	13123	4.01622	1	0.239813	20.7322
GO:0046513~ceramide biosynthetic process	6	0.356083	0.0124196	P2RX7,P2RX1,SMPD1,LASS5,LASS6,CLN8	1307	15	13123	4.01622	1	0.239813	20.7322
GO:0001938~positive regulation of endothelial cell proliferation	6	0.356083	0.0124196	HIF1A,CCL2,PDGFB,ANG,VEGFA,TNFSF12	1307	15	13123	4.01622	1	0.239813	20.7322
GO:0042088~T-helper 1 type immune response	5	0.296736	0.0125467	IL18BP,VEGFA,BCL3,TLR6,EBI3	1307	10	13123	5.02028	1	0.240815	20.9216
GO:0050930~induction of positive chemotaxis	5	0.296736	0.0125467	PRKCA,IL8,IL16,VEGFA,CXCL12	1307	10	13123	5.02028	1	0.240815	20.9216
GO:0051085~chaperone mediated protein folding requiring cofactor	5	0.296736	0.0125467	TOR3A,DNAJB1,ERO1L,HLA-DMA,CD74	1307	10	13123	5.02028	1	0.240815	20.9216
GO:0060326~cell chemotaxis	10	0.593472	0.0126373	PRKCA,DOCK2,CCL2,IL8,IL16,PDGFB,CXCL16,S100A9,IL1B,SYK	1307	39	13123	2.5745	1	0.241196	21.0565
GO:0051781~positive regulation of cell division	10	0.593472	0.0126373	OSM,VEGFB,PPBP,PDGFB,EREG,VEGFA,TGFA,IL1B,CAT,IL1A	1307	39	13123	2.5745	1	0.241196	21.0565
GO:0008361~regulation of cell size	32	1.89911	0.012724	NRP1,PDGFB,PPARG,PPT1,IL7R,ACVR1B,APP,LAMB2,CYP27B1,NUBP1,CDKN2D,RB1CC1,PPP2CA,BCL6,SEMA3A,SERTAD1,ADAM10,SPHK1,SLC3A2,CDK4,VAT1,CD38,CDKN1A,ATP6V0E2,NUPR1,BTG1,CXCL16,CYFIP1,HBEGF,DCUN1D3,C6ORF108,CLN8	1307	206	13123	1.5597	1	0.241508	21.1851
GO:0002274~myeloid leukocyte activation	11	0.652819	0.0134367	CD48,SLC11A1,ADAM10,GIMAP5,IL8,LYN,SNCA,TLR2,NDRG1,TLR6,TLR7	1307	46	13123	2.401	1	0.252073	22.2363
GO:0001508~regulation of action potential	14	0.830861	0.0137173	KCNMA1,KCNMB3,CLN3,EGR2,AFG3L2,MBP,CD9,P2RX4,P2RX7,P2RX1,NAB2,NAB1,PMP22,ERCC2	1307	67	13123	2.09803	1	0.255454	22.6464
GO:0006898~receptor-mediated endocytosis	12	0.712166	0.0138114	ASGR1,CLN3,ADRB2,MSR1,PICALM,PDLIM7,STAB1,CXCL16,SORL1,SNCA,PPT1,LRP3	1307	53	13123	2.27333	1	0.2558	22.7835
GO:0015804~neutral amino acid transport	7	0.41543	0.0140504	SLC1A5,NFKBIE,SERINC1,SLC7A8,SLC3A2,SLC38A1,SLC7A5	1307	21	13123	3.34685	1	0.25845	23.1307
GO:0042098~T cell proliferation	8	0.474777	0.0142118	SLC11A1,P2RX7,DOCK2,CCND3,CXCR4,FYN,IL15,CXCL12	1307	27	13123	2.97498	1	0.25984	23.3643
GO:0014070~response to organic cyclic substance	21	1.24629	0.0146201	PRKCA,PTGS2,LYN,ADORA2A,SOCS3,IGFBP7,PPARG,EPHX1,PTEN,CCNE1,P2RX7,CDKN1A,ACSL1,BTG2,CD44,ALDH2,SMPD1,VKORC1,PEBP1,IL1B,SERPINA1	1307	120	13123	1.7571	1	0.265073	23.9522
GO:0051341~regulation of oxidoreductase activity	10	0.593472	0.0149055	OXA1L,CYP27B1,HIF1A,SNCA,IL1B,NFKB1,SCARB1,ABL1,ABL2,GCH1	1307	40	13123	2.51014	1	0.268322	24.3606
GO:0048469~cell maturation	15	0.890208	0.0150143	KCNMA1,CEBPA,RET,MAEA,EPAS1,PPARG,TIMP1,APP,AGPAT6,HES5,EREG,ANG,VEGFA,RUNX3,ERCC2	1307	75	13123	2.00811	1	0.268816	24.5158
GO:0032844~regulation of homeostatic process	20	1.18694	0.0155911	GIMAP5,IL2RA,LYN,STAT5A,PIF1,SPI1,TERF2IP,ADA,P2RX4,CD38,ACVR1B,P2RX7,HIF1A,CD44,VEGFA,CALM3,SLC22A5,CA2,INPP5D,ERCC1	1307	113	13123	1.77709	1	0.276421	25.3334
GO:0002755~MyD88-dependent toll-like receptor signaling pathway	4	0.237389	0.015616	IRAK2,IRAK1,TLR2,HSPD1	1307	6	13123	6.6937	1	0.275601	25.3685
GO:0002703~regulation of leukocyte mediated immunity	13	0.771513	0.0157571	GIMAP5,STAT5A,CD40,TNFSF12,IL7R,P2RX7,PVRL2,IL1B,FCER1G,BCL6,HSPD1,CD226,SYK	1307	61	13123	2.13979	1	0.276531	25.5671
GO:0006818~hydrogen transport	13	0.771513	0.0157571	ATP5D,ADHFE1,ATP6V1H,ATP6V1G2,ATP5G2,ATP5G1,ATP6V0E2,SLC23A2,ATP6V0A1,C16ORF7,ATP5I,ATP5H,ATP6V0A2	1307	61	13123	2.13979	1	0.276531	25.5671
GO:0008629~induction of apoptosis by intracellular signals	12	0.712166	0.015831	PRKCA,CDKN1A,TP53I3,NUPR1,HTRA2,PCBP4,HIPK2,BCL3,DYRK2,IFI16,ABL1,ATM	1307	54	13123	2.23123	1	0.27645	25.6709
GO:0002706~regulation of lymphocyte mediated immunity	12	0.712166	0.015831	P2RX7,GIMAP5,STAT5A,PVRL2,FCER1G,IL1B,BCL6,TNFSF12,HSPD1,CD40,IL7R,CD226	1307	54	13123	2.23123	1	0.27645	25.6709
GO:0010562~positive regulation of phosphorus metabolic process	18	1.06825	0.0160432	PRKCA,BMP2,LYN,IGF1,TNFRSF14,OSM,P2RX7,EREG,CD80,CCND3,ANG,CLCF1,RB1CC1,IL1B,CD4,FAM129A,THBS1,SYK	1307	98	13123	1.84418	1	0.278418	25.9682
GO:0045937~positive regulation of phosphate metabolic process	18	1.06825	0.0160432	PRKCA,BMP2,LYN,IGF1,TNFRSF14,OSM,P2RX7,EREG,CD80,CCND3,ANG,CLCF1,RB1CC1,IL1B,CD4,FAM129A,THBS1,SYK	1307	98	13123	1.84418	1	0.278418	25.9682
GO:0050670~regulation of lymphocyte proliferation	16	0.949555	0.016083	IL2RA,STAT5A,TNFRSF14,CD40,IL15,ADA,CD38,CBLB,CDKN1A,TNFSF13B,CD80,IL1B,BCL6,INPP5D,EBI3,SYK	1307	83	13123	1.93553	1	0.277826	26.0239
GO:0046520~sphingoid biosynthetic process	6	0.356083	0.0166126	P2RX7,P2RX1,SMPD1,LASS5,LASS6,CLN8	1307	16	13123	3.76521	1	0.284394	26.7607
GO:0006458~'de novo' protein folding	6	0.356083	0.0166126	TOR3A,DNAJB1,ERO1L,HSPD1,HLA-DMA,CD74	1307	16	13123	3.76521	1	0.284394	26.7607
GO:0031099~regeneration	14	0.830861	0.0173704	CCL2,GATM,SOCS3,PPARG,IGF1,GAS6,PLAUR,NOTCH3,CCNE1,CDKN1A,LAMB2,ADM,ATIC,VCAN	1307	69	13123	2.03721	1	0.294107	27.8029
GO:0019221~cytokine-mediated signaling pathway	14	0.830861	0.0173704	IRAK2,CEBPA,IRAK1,PLP2,CCL2,STAT5A,EREG,CLCF1,TGM2,PYCARD,CSF2RB,IL1B,LRP8,IL1A	1307	69	13123	2.03721	1	0.294107	27.8029
GO:0006691~leukotriene metabolic process	7	0.41543	0.0177303	PTGR1,ALOX5AP,LTA4H,LTC4S,RNPEP,MGST2,SYK	1307	22	13123	3.19472	1	0.297999	28.2928
GO:0045861~negative regulation of proteolysis	7	0.41543	0.0177303	HSP90AB1,CLN3,IDE,SERPING1,THBS1,CLN8,TIMP1	1307	22	13123	3.19472	1	0.297999	28.2928
GO:0048871~multicellular organismal homeostasis	16	0.949555	0.0178366	BBS4,GIMAP5,LIPA,EPAS1,ACP5,COL2A1,P2RX4,SLC11A1,P2RX7,ADRB2,CTSK,RAC2,TPP1,VEGFA,IL1B,IL1A	1307	84	13123	1.91249	1	0.298277	28.437
GO:0032944~regulation of mononuclear cell proliferation	16	0.949555	0.0178366	IL2RA,STAT5A,TNFRSF14,CD40,IL15,ADA,CD38,CBLB,CDKN1A,TNFSF13B,CD80,IL1B,BCL6,INPP5D,EBI3,SYK	1307	84	13123	1.91249	1	0.298277	28.437
GO:0070663~regulation of leukocyte proliferation	16	0.949555	0.0178366	IL2RA,STAT5A,TNFRSF14,CD40,IL15,ADA,CD38,CBLB,CDKN1A,TNFSF13B,CD80,IL1B,BCL6,INPP5D,EBI3,SYK	1307	84	13123	1.91249	1	0.298277	28.437
GO:0042108~positive regulation of cytokine biosynthetic process	11	0.652819	0.0179885	CD80,EREG,STAT5A,IL1B,BCL3,CD4,TLR6,TLR7,EBI3,IL1A,SYK	1307	48	13123	2.30096	1	0.299191	28.6426
GO:0043603~cellular amide metabolic process	12	0.712166	0.018064	CEBPA,NAMPT,LDHB,TP53I3,KYNU,IDH3G,STAT5A,MCCC1,PGD,KMO,HIBADH,NAPRT1	1307	55	13123	2.19067	1	0.299031	28.7445
GO:0002478~antigen processing and presentation of exogenous peptide antigen	5	0.296736	0.0181856	FCER1G,HLA-DOA,HLA-DMA,CD74,HLA-DRA	1307	11	13123	4.56389	1	0.299511	28.9083
GO:0046636~negative regulation of alpha-beta T cell activation	5	0.296736	0.0181856	CBLB,ADORA2A,HLX,BCL6,TNFRSF14	1307	11	13123	4.56389	1	0.299511	28.9083
GO:0051452~intracellular pH reduction	5	0.296736	0.0181856	CLN3,SLC11A1,ATP6V0E2,ATP6V1H,PPT1	1307	11	13123	4.56389	1	0.299511	28.9083
GO:0043030~regulation of macrophage activation	5	0.296736	0.0181856	SNCA,HSPD1,THBS1,CD74,MIF	1307	11	13123	4.56389	1	0.299511	28.9083
GO:0010885~regulation of cholesterol storage	5	0.296736	0.0181856	MSR1,CD36,PPARG,SCARB1,NR1H3	1307	11	13123	4.56389	1	0.299511	28.9083
GO:0002521~leukocyte differentiation	22	1.30564	0.018999	CEBPA,GIMAP5,FLT3,STAT5A,PPARG,ITPKB,IFI16,OSTM1,IL15,MYH9,TPD52,IL7R,HLA-DMA,ADA,CD74,DOCK2,RPL22,CLCF1,BCL3,CD4,BCL6,SYK	1307	131	13123	1.6862	1	0.309447	29.9953
GO:0048145~regulation of fibroblast proliferation	9	0.534125	0.0193217	FNTB,CDKN1A,NUPR1,PDGFB,EREG,SPHK1,IGF1,CDK4,SOD2	1307	35	13123	2.58186	1	0.312582	30.4222
GO:0050885~neuromuscular process controlling balance	9	0.534125	0.0193217	KCNMA1,CLN3,APP,GM2A,TPP1,MYO7A,AARS,GAA,CLN8	1307	35	13123	2.58186	1	0.312582	30.4222
GO:0048585~negative regulation of response to stimulus	18	1.06825	0.0193409	PRKCA,CLN3,IL2RA,ADORA2A,SOCS3,PPARG,SERPING1,IL7R,ADA,RPS3,ADRB2,AES,SERPINF1,AOAH,IL1B,BCL6,PTPN1,INPP5D	1307	100	13123	1.8073	1	0.311612	30.4476
GO:0044275~cellular carbohydrate catabolic process	16	0.949555	0.0197325	LDHB,LDHA,GNPDA1,PFKL,PGD,PGAM1,PFKP,HK2,HK1,OGDH,HIBADH,GPD1L,PGM1,GAA,GAPDH,PYGB	1307	85	13123	1.88999	1	0.315614	30.9621
GO:0006811~ion transport	93	5.51929	0.0199079	ATP5D,KCNJ15,TSPO,SLC44A1,ATP1B3,KCNAB1,ATOX1,KCNJ12,KCNK12,SHKBP1,SLC23A2,MCOLN1,SLC22A5,MCOLN2,ATP5I,KCNQ2,COX17,ATP5H,NSF,KCNMA1,CLNS1A,SLC3A2,ATP6V1H,KCTD20,TCN2,PKD2L1,TMEM38B,ATP2C1,CLIC4,SLC41A2,AKAP7,SLC38A1,PCYOX1,CLN8,SLC40A1,KCNMB3,ORAI1,SLC38A2,CHKB,SLC38A7,CAMK2G,FKBP4,SLC38A6,SFXN4,CACNB3,ATP5G2,ATP6V1G2,ATP5G1,FXYD5,KCNJ2,FXYD6,FTH1,SFXN5,TPCN1,SLC11A1,TTYH3,TMEM37,CYP27B1,SLC30A1,…	1307	752	13123	1.24172	1	0.316708	31.1913
GO:0010243~response to organic nitrogen	13	0.771513	0.0200894	CCL2,PTGS2,LYN,ADORA2A,PTGS1,AARS,CCNE1,CDKN1A,BTG2,PEMT,VKORC1,PEBP1,MGST1	1307	63	13123	2.07186	1	0.31787	31.4278
GO:0030099~myeloid cell differentiation	17	1.0089	0.0205518	CEBPA,MAEA,GIMAP5,LYN,EPAS1,PPARG,IFI16,OSTM1,MYH9,TIMP1,DNASE2,RPS14,VEGFA,IRF8,BCL6,RUNX1,ERCC2	1307	93	13123	1.83537	1	0.322675	32.027
GO:0034101~erythrocyte homeostasis	11	0.652819	0.0206484	DNASE2,MAEA,EPAS1,LYN,RPS17,RPS14,VEGFA,BCL6,PRDX1,TIMP1,ERCC2	1307	49	13123	2.254	1	0.322695	32.1514
GO:0050921~positive regulation of chemotaxis	8	0.474777	0.0209751	PRKCA,ADAM10,IL8,IL16,PDGFB,VEGFA,THBS1,CXCL12	1307	29	13123	2.76981	1	0.325668	32.571
GO:0002697~regulation of immune effector process	18	1.06825	0.0211733	GIMAP5,STAT5A,ATP6V1H,SERPING1,TNFSF12,CD40,IL15,IL7R,P2RX7,CD37,AP2A2,PVRL2,IL1B,FCER1G,BCL6,HSPD1,CD226,SYK	1307	101	13123	1.78941	1	0.326968	32.8243
GO:0016485~protein processing	19	1.1276	0.0216252	CLN3,F12,SERPING1,MMP14,C1QC,C1QA,C1QB,P2RX7,DNER,PRSS3,CFH,C1RL,SCG5,C2,CFD,PARP1,CASP1,PCSK5,SRGN	1307	109	13123	1.75019	1	0.331454	33.3985
GO:0002474~antigen processing and presentation of peptide antigen via MHC class I	6	0.356083	0.0216483	HLA-H,HLA-A,ERAP2,HLA-B,HLA-E,HLA-F	1307	17	13123	3.54372	1	0.330513	33.4277
GO:0070555~response to interleukin-1	6	0.356083	0.0216483	PRKCA,IRAK2,IRAK1,CD38,AES,SNCA	1307	17	13123	3.54372	1	0.330513	33.4277
GO:0009719~response to endogenous stimulus	54	3.20475	0.0217156	ADCY3,PDGFB,PTGS2,ADCY7,IGFBP7,STAT5A,PPARG,PTGS1,FOXO1,PTEN,CITED1,CCNE1,ANG,VKORC1,IL1B,SERPINA1,GNG7,KCNMA1,PRKCA,EGR2,GATM,SOCS2,LYN,SOCS3,BAIAP2,AARS,FBP1,MMP14,C1QB,CD38,MAPK1,ADM,BTG2,PEBP1,SORT1,GNB4,CA2,CCL2,ADORA2A,SRF,CYP27B1,PEMT,THBS1,MAT2A,IL1RN,RCAN1,CDKN1A,NUP62,PRKAR1A,ALDH2,PTPN1,PARP1,MGST1,ABCC5	1307	404	13123	1.34205	1	0.330133	33.5129
GO:0043449~cellular alkene metabolic process	7	0.41543	0.0220199	PTGR1,ALOX5AP,LTA4H,LTC4S,RNPEP,MGST2,SYK	1307	23	13123	3.05582	1	0.332699	33.8963
GO:0009112~nucleobase metabolic process	7	0.41543	0.0220199	MAPK1,SHMT1,CAD,PAICS,AMPD3,ADA,APRT	1307	23	13123	3.05582	1	0.332699	33.8963
GO:0032675~regulation of interleukin-6 production	9	0.534125	0.0227404	P2RX7,CEBPB,EREG,TLR2,IL1B,HSPD1,INPP5D,TLR6,TLR7	1307	36	13123	2.51014	1	0.340334	34.7958
GO:0006633~fatty acid biosynthetic process	15	0.890208	0.0229948	PTGS2,PTGS1,LTC4S,CD74,MIF,PECR,C5ORF4,ALOX5AP,FASN,LTA4H,PRKAA1,RNPEP,SC5DL,SYK,MGST2	1307	79	13123	1.90643	1	0.342193	35.1106
GO:0019748~secondary metabolic process	15	0.890208	0.0229948	NAMPT,LDHB,KYNU,CYP1B1,PGD,DHRS9,CYP26A1,KMO,HIBADH,TP53I3,DHRS3,IDH3G,ALDH1A3,DDT,NAPRT1	1307	79	13123	1.90643	1	0.342193	35.1106
GO:0045787~positive regulation of cell cycle	12	0.712166	0.0232195	APP,CCND3,EREG,STAT5A,SPHK1,TGFA,PEBP1,IL1B,IGF1,USP22,IL1A,CITED2	1307	57	13123	2.1138	1	0.343673	35.3875
GO:0009617~response to bacterium	28	1.66172	0.0241118	CCL2,PTGS2,SNCA,TLR2,NFKBIA,TLR6,GCH1,SLC11A1,NLRC4,CYP27B1,HIST1H2BK,IL1B,BCL3,SCARB1,SERPINA1,IRAK1,LY96,SOCS3,HCK,MAPK1,P2RX7,ADM,PPBP,STAB1,HIST2H2BE,MGST1,CD14,ABCC5	1307	183	13123	1.53626	1	0.353081	36.4761
GO:0051338~regulation of transferase activity	50	2.96736	0.0247568	ADCY3,ADCY7,PDGFB,PPARG,LPAR1,TLR6,SDC4,PTEN,MAP3K6,APP,CXCR4,ANG,CDKN2D,SPRED2,IL1B,TGFA,CDK5RAP3,SPRED1,SERTAD1,SYK,PRKCA,IRAK1,ADRB2,CCND3,EREG,CLN8,SNX6,ADORA2A,PTPLAD1,FPR1,MAP4K1,CD74,CDC37,SLC11A1,PPP2CA,SERINC1,CD4,PRKAA1,PPAP2A,THBS1,PIF1,SPHK1,CISH,YWHAG,P2RX7,CDKN1A,NUP62,PRKAR1A,LRP8,DUSP6	1307	372	13123	1.34954	1	0.359401	37.2521
GO:0007566~embryo implantation	8	0.474777	0.0250781	PTGS2,KLF9,IGFBP7,FKBP4,GRN,IL1B,PCSK5,IL11RA	1307	30	13123	2.67748	1	0.361873	37.6353
GO:0032368~regulation of lipid transport	8	0.474777	0.0250781	P2RX4,P2RX7,TSPO,APOC1,NFKBIA,NFKB1,THBS1,NR1H3	1307	30	13123	2.67748	1	0.361873	37.6353
GO:0009306~protein secretion	8	0.474777	0.0250781	TRAF3IP2,NLRC4,ARFGAP3,TNFSF13B,LYN,ERP29,CANX,PCSK5	1307	30	13123	2.67748	1	0.361873	37.6353
GO:0045851~pH reduction	5	0.296736	0.0251691	CLN3,SLC11A1,ATP6V0E2,ATP6V1H,PPT1	1307	12	13123	4.18356	1	0.361665	37.7435
GO:0030217~T cell differentiation	13	0.771513	0.0252503	GIMAP5,FLT3,STAT5A,ITPKB,IL15,IL7R,HLA-DMA,CD74,DOCK2,RPL22,BCL3,CD4,SYK	1307	65	13123	2.00811	1	0.361346	37.8398
GO:0001774~microglial cell activation	4	0.237389	0.0253255	SNCA,TLR2,TLR6,TLR7	1307	7	13123	5.73746	1	0.36096	37.9289
GO:0045059~positive thymic T cell selection	4	0.237389	0.0253255	DOCK2,ITPKB,HLA-DMA,CD74	1307	7	13123	5.73746	1	0.36096	37.9289
GO:0055093~response to hyperoxia	4	0.237389	0.0253255	CDKN1A,PDPN,ALDH2,SOD2	1307	7	13123	5.73746	1	0.36096	37.9289
GO:0006007~glucose catabolic process	12	0.712166	0.0261657	LDHB,LDHA,PFKL,PGM1,PGD,PGAM1,HK2,PFKP,HK1,OGDH,GAPDH,HIBADH	1307	58	13123	2.07736	1	0.369247	38.9162
GO:0050864~regulation of B cell activation	11	0.652819	0.0268085	CD38,CDKN1A,TNFSF13B,FLT3,STAT5A,BCL6,TNFSF12,CD40,INPP5D,ADA,SYK	1307	51	13123	2.16561	1	0.375173	39.6613
GO:0002889~regulation of immunoglobulin mediated immune response	7	0.41543	0.0269571	GIMAP5,PVRL2,FCER1G,BCL6,TNFSF12,CD40,CD226	1307	24	13123	2.92849	1	0.375557	39.8325
GO:0002712~regulation of B cell mediated immunity	7	0.41543	0.0269571	GIMAP5,PVRL2,FCER1G,BCL6,TNFSF12,CD40,CD226	1307	24	13123	2.92849	1	0.375557	39.8325
GO:0051180~vitamin transport	7	0.41543	0.0269571	FOLR2,PDPN,SLC23A2,CHKB,SLC5A6,SLC22A5,TCN2	1307	24	13123	2.92849	1	0.375557	39.8325
GO:0002699~positive regulation of immune effector process	10	0.593472	0.0270201	P2RX7,CD37,GIMAP5,STAT5A,PVRL2,FCER1G,IL1B,HSPD1,CD226,SYK	1307	44	13123	2.28194	1	0.374993	39.9048
GO:0009168~purine ribonucleoside monophosphate biosynthetic process	6	0.356083	0.0275797	ATIC,CECR1,PAICS,AMPD3,ADA,IMPDH2	1307	18	13123	3.34685	1	0.379867	40.5441
GO:0009127~purine nucleoside monophosphate biosynthetic process	6	0.356083	0.0275797	ATIC,CECR1,PAICS,AMPD3,ADA,IMPDH2	1307	18	13123	3.34685	1	0.379867	40.5441
GO:0015939~pantothenate metabolic process	3	0.178042	0.0277249	VNN1,VNN2,VNN3	1307	3	13123	10.0406	1	0.380187	40.709
GO:0009725~response to hormone stimulus	49	2.90801	0.0280034	ADCY3,PDGFB,PTGS2,ADCY7,IGFBP7,STAT5A,PPARG,PTGS1,FOXO1,PTEN,CITED1,CCNE1,ANG,IL1B,SERPINA1,GNG7,KCNMA1,PRKCA,EGR2,GATM,SOCS2,LYN,SOCS3,BAIAP2,FBP1,MMP14,C1QB,CD38,MAPK1,ADM,BTG2,PEBP1,SORT1,GNB4,CA2,CCL2,SRF,CYP27B1,THBS1,MAT2A,IL1RN,RCAN1,CDKN1A,NUP62,PRKAR1A,ALDH2,PTPN1,PARP1,ABCC5	1307	366	13123	1.34423	1	0.381941	41.0239
GO:0046164~alcohol catabolic process	15	0.890208	0.0280082	LDHB,LDHA,GNPDA1,PFKL,MAOA,PGD,PGAM1,PFKP,HK2,HK1,OGDH,HIBADH,GPD1L,PGM1,GAPDH	1307	81	13123	1.85936	1	0.380743	41.0294
GO:0048661~positive regulation of smooth muscle cell proliferation	8	0.474777	0.0296979	PRKCA,PTGS2,PDGFB,EREG,VEGFA,TGM2,IGF1,HBEGF	1307	31	13123	2.59111	1	0.397374	42.9063
GO:0050920~regulation of chemotaxis	8	0.474777	0.0296979	PRKCA,ADAM10,IL8,IL16,PDGFB,VEGFA,THBS1,CXCL12	1307	31	13123	2.59111	1	0.397374	42.9063
GO:0043627~response to estrogen stimulus	18	1.06825	0.0298489	PRKCA,KCNMA1,PDGFB,PTGS2,SOCS2,SOCS3,PPARG,RCAN1,MMP14,PTEN,CITED1,CCNE1,MAPK1,CD38,CYP27B1,IL1B,SERPINA1,CA2	1307	105	13123	1.72124	1	0.397671	43.0713
GO:0044092~negative regulation of molecular function	45	2.67062	0.030609	PSMB10,ADCY3,OXA1L,SNX6,ADCY7,ADORA2A,SNCA,PPARG,APOC1,NFKBIA,NFKB1,CDC16,RPS3,CYP27B1,AES,GALR1,CDKN2D,PPP2CA,SPRED2,IL1B,CAT,SPRED1,NQO1,GCHFR,IRAK2,PRKCA,IRAK1,CLN3,HERPUD1,PIF1,PSMB8,PSMB9,LRPAP1,CDKN1A,ADRB2,YWHAG,RGS1,PSMA6,NUP62,CALM3,SORT1,ID3,CLN8,DNAJB6,DUSP6	1307	333	13123	1.35683	1	0.404233	43.8947
GO:0009266~response to temperature stimulus	15	0.890208	0.0307965	CCL2,LYN,SOCS3,IGFBP7,PPARG,CSDA,OSM,ADRB2,ADM,STAC,NR2F6,PEBP1,IL1B,ERO1L,THBS1	1307	82	13123	1.83669	1	0.40487	44.0962
GO:0048870~cell motility	42	2.49258	0.0308827	ZFAND5,NRP1,CCL2,IL16,PDGFB,WASF2,S100A9,TNFSF12,SRF,PTEN,CXCL12,DOCK2,CD44,CXCR4,ANG,DNER,PRSS3,DNAJA1,IL1B,SCARB1,PPAP2A,THBS1,SYK,PRKCA,RET,IL8,ARID5B,MYH9,MMP14,NDEL1,TNS1,HIF1A,PARP9,FYN,BTG1,ITGA5,CXCL16,HBEGF,VCAN,LRP8,LAMC1,ACVR1	1307	307	13123	1.37363	1	0.404473	44.1885
GO:0051674~localization of cell	42	2.49258	0.0308827	ZFAND5,NRP1,CCL2,IL16,PDGFB,WASF2,S100A9,TNFSF12,SRF,PTEN,CXCL12,DOCK2,CD44,CXCR4,ANG,DNER,PRSS3,DNAJA1,IL1B,SCARB1,PPAP2A,THBS1,SYK,PRKCA,RET,IL8,ARID5B,MYH9,MMP14,NDEL1,TNS1,HIF1A,PARP9,FYN,BTG1,ITGA5,CXCL16,HBEGF,VCAN,LRP8,LAMC1,ACVR1	1307	307	13123	1.37363	1	0.404473	44.1885
GO:0018108~peptidyl-tyrosine phosphorylation	10	0.593472	0.0308965	OSM,LYN,FYN,STAT5A,ABI3,FES,ABL1,ABL2,EPHB2,SYK	1307	45	13123	2.23123	1	0.403347	44.2033
GO:0040017~positive regulation of locomotion	17	1.0089	0.0320922	PRKCA,ADAM10,PDGFB,IL16,IL8,PDPN,SPHK1,IGF1,CXCL12,MAPK1,HIF1A,CXCL16,VEGFA,HBEGF,SCARB1,TRIP6,THBS1	1307	98	13123	1.74173	1	0.414063	45.4694
GO:0006457~protein folding	26	1.54303	0.0321464	HSP90AB1,FKBP5,WFS1,FKBP4,DNAJC10,PDIA6,HLA-DMA,CANX,CD74,TOR3A,BAG3,DNAJA1,ERO1L,QSOX1,CLN3,ERP29,AARS,LRPAP1,HSP90B1,PPIH,PPIC,C19ORF2,FKBP15,HSPD1,DNAJB1,DNAJB6	1307	171	13123	1.52663	1	0.413325	45.5261
GO:0032768~regulation of monooxygenase activity	7	0.41543	0.0325747	CYP27B1,HIF1A,SNCA,IL1B,NFKB1,SCARB1,GCH1	1307	25	13123	2.81135	1	0.416272	45.9726
GO:0046637~regulation of alpha-beta T cell differentiation	7	0.41543	0.0325747	GIMAP5,CD80,HLX,ITPKB,BCL6,ADA,SYK	1307	25	13123	2.81135	1	0.416272	45.9726
GO:0006766~vitamin metabolic process	14	0.830861	0.0327575	SHMT1,NAMPT,KYNU,DHRS9,CYP26A1,KMO,DHRS3,CYP27B1,AKR1A1,SLC23A2,ALDH1A3,MCCC1,VKORC1,NAPRT1	1307	75	13123	1.87424	1	0.41679	46.162
GO:0046640~regulation of alpha-beta T cell proliferation	5	0.296736	0.0335558	CBLB,CD80,TNFRSF14,EBI3,SYK	1307	13	13123	3.86175	1	0.423256	46.9821
GO:0051084~'de novo' posttranslational protein folding	5	0.296736	0.0335558	TOR3A,DNAJB1,ERO1L,HLA-DMA,CD74	1307	13	13123	3.86175	1	0.423256	46.9821
GO:0045086~positive regulation of interleukin-2 biosynthetic process	5	0.296736	0.0335558	CD80,STAT5A,IL1B,CD4,IL1A	1307	13	13123	3.86175	1	0.423256	46.9821
GO:0045333~cellular respiration	15	0.890208	0.0337819	OXA1L,NDUFB7,NDUFA8,SUCLG2,ACO1,SNCA,TAZ,SOD2,SDHB,IDH3G,UQCRH,NDUFV1,NDUFV2,IDH2,CAT	1307	83	13123	1.81456	1	0.424153	47.2122
GO:0002683~negative regulation of immune system process	15	0.890208	0.0337819	IL2RA,GIMAP5,ADORA2A,FLT3,TNFRSF14,SERPING1,IL7R,CD74,ADA,CBLB,HLX,BCL6,INPP5D,THBS1,PAG1	1307	83	13123	1.81456	1	0.424153	47.2122
GO:0016310~phosphorylation	94	5.57864	0.0341083	ATP5D,STK33,TBK1,STAT5A,SNCA,CAD,EIF2A,LPAR1,PMVK,FES,PRKX,MAP3K6,ACVR1B,APP,ADCK1,CXCR4,MAP3K8,TGFA,IL1B,CDK10,STK39,MLKL,ATP5I,ATP5H,MATK,SYK,IRAK2,PRKCA,IRAK1,RET,TNIK,ADAM10,LYN,TAZ,ATP6V1H,PIM2,CDK4,MARK2,OSM,MAPK1,UQCRH,HIPK2,RIPK3,TESK2,LRRK2,UGP2,ACVR1,CCL2,NDUFB7,PTPLAD1,CAMK2G,ABI3,HK2,FPR1,MAP4K1,ATP5G2,BRSK1,ATP5G1,CD74,EPHB2,GALK1,STK40,DYRK4,PRKAA1,C16ORF7,DYRK2,THBS1,BMP2,PTPRE,NDU…	1307	779	13123	1.21157	1	0.425996	47.5428
GO:0008360~regulation of cell shape	11	0.652819	0.034179	FGD2,CDC42EP2,PDPN,FYN,CDC42SE2,VEGFA,GNA12,CDC42SE1,CYFIP1,MYH9,CDC42EP4	1307	53	13123	2.08389	1	0.4254	47.6141
GO:0019370~leukotriene biosynthetic process	6	0.356083	0.0344487	ALOX5AP,LTA4H,LTC4S,RNPEP,MGST2,SYK	1307	19	13123	3.1707	1	0.426688	47.8854
GO:0043450~alkene biosynthetic process	6	0.356083	0.0344487	ALOX5AP,LTA4H,LTC4S,RNPEP,MGST2,SYK	1307	19	13123	3.1707	1	0.426688	47.8854
GO:0001936~regulation of endothelial cell proliferation	8	0.474777	0.0348581	PTPRM,HIF1A,CCL2,PDGFB,ANG,VEGFA,TNFSF12,THBS1	1307	32	13123	2.51014	1	0.429269	48.2947
GO:0032268~regulation of cellular protein metabolic process	60	3.56083	0.0350942	HSP90AB1,METAP1,PDGFB,IDE,SNCA,NFKB1,EIF2A,CDC16,TLR6,MAP3K6,APP,ANG,CLCF1,ATG7,IL1B,FAM129A,SYK,PRKCA,F12,CLN3,LYN,SOCS3,ACO1,TNFRSF14,SERPING1,RPS4X,CDK4,OSM,EIF4G1,MAPK1,EIF4G2,PSMA6,CCND3,CD80,PEBP1,LRRK2,CLN8,PSMB10,EIF4E3,PTPLAD1,NFKBIA,MAP4K1,TIMP1,TNRC6C,PPP2CA,RB1CC1,EIF3E,PEMT,BCL3,CD4,THBS1,NR1H3,BMP2,IGF1,RPS5,PSMB8,PSMB9,EIF4B,P2RX7,PRKAR1A	1307	470	13123	1.28177	1	0.430212	48.5293
GO:0048660~regulation of smooth muscle cell proliferation	10	0.593472	0.0351435	PRKCA,PTGS2,PDGFB,EREG,ANG,VEGFA,TGM2,IGF1,HBEGF,IL15	1307	46	13123	2.18273	1	0.429416	48.5782
GO:0045859~regulation of protein kinase activity	46	2.72997	0.0351796	ADCY3,PDGFB,SNX6,ADCY7,ADORA2A,PTPLAD1,FPR1,MAP4K1,LPAR1,TLR6,SDC4,PTEN,CD74,CDC37,MAP3K6,SLC11A1,APP,CXCR4,ANG,CDKN2D,PPP2CA,SPRED2,TGFA,IL1B,CD4,CDK5RAP3,PRKAA1,SPRED1,PPAP2A,THBS1,SERTAD1,SYK,PRKCA,IRAK1,SPHK1,CISH,P2RX7,YWHAG,ADRB2,CDKN1A,NUP62,CCND3,EREG,PRKAR1A,LRP8,DUSP6	1307	345	13123	1.33874	1	0.428503	48.614
GO:0006631~fatty acid metabolic process	29	1.72107	0.0358494	SLC27A1,ECH1,PTGS2,STAT5A,CHKB,PTGS1,SNCA,ECHS1,LTC4S,CD74,MIF,PECR,AGPAT6,ACSL1,ALOX5AP,FASN,PRKAA1,ACSL4,SYK,PTGR1,PLA2G15,LIPA,PDPN,C5ORF4,LTA4H,SLC27A3,SC5DL,RNPEP,MGST2	1307	198	13123	1.47059	1	0.433419	49.2731
GO:0051247~positive regulation of protein metabolic process	34	2.0178	0.0365311	PSMB10,WFS1,NFKBIA,CDC16,CLCF1,RB1CC1,ATG7,PEMT,IL1B,BCL3,CD4,THBS1,FAM129A,SYK,NR1H3,PRKCA,F12,BMP2,LYN,IGF1,TNFRSF14,CDK4,RPS4X,PSMB8,PSMB9,OSM,MAPK1,P2RX7,CBLB,PSMA6,CD80,CCND3,TRIM32,LRRK2	1307	241	13123	1.41651	1	0.438366	49.9358
GO:0050866~negative regulation of cell activation	12	0.712166	0.0366127	CBLB,IL2RA,GIMAP5,PDGFB,ADORA2A,FLT3,HLX,BCL6,TNFRSF14,INPP5D,CD74,PAG1	1307	61	13123	1.97519	1	0.437854	50.0145
GO:0051605~protein maturation by peptide bond cleavage	15	0.890208	0.036971	F12,SERPING1,MMP14,C1QC,C1QA,C1QB,DNER,PRSS3,CFH,C1RL,SCG5,C2,CFD,PCSK5,SRGN	1307	84	13123	1.79296	1	0.439827	50.359
GO:0001944~vasculature development	35	2.07715	0.0372473	ZFAND5,NRP1,WASF2,FOXO1,TNFSF12,SRF,PTEN,CXCL12,CITED1,CITED2,ARHGAP22,CD44,HEY1,CXCR4,ANG,TGM2,IL1B,ZC3H12A,TGFA,THBS1,CCM2,EPAS1,IL8,PDPN,EFNB2,MMP19,MYH9,MMP14,NCL,PNPLA6,HIF1A,EREG,VEGFA,TNFAIP2,ACVR1	1307	250	13123	1.40568	1	0.44105	50.6232
GO:0046851~negative regulation of bone remodeling	4	0.237389	0.0375683	CD38,P2RX7,VEGFA,INPP5D	1307	8	13123	5.02028	1	0.442657	50.9283
GO:0045779~negative regulation of bone resorption	4	0.237389	0.0375683	CD38,P2RX7,VEGFA,INPP5D	1307	8	13123	5.02028	1	0.442657	50.9283
GO:0051250~negative regulation of lymphocyte activation	11	0.652819	0.038349	CBLB,IL2RA,GIMAP5,ADORA2A,FLT3,HLX,BCL6,TNFRSF14,INPP5D,CD74,PAG1	1307	54	13123	2.0453	1	0.448273	51.6631
GO:0048146~positive regulation of fibroblast proliferation	7	0.41543	0.0388998	FNTB,CDKN1A,PDGFB,EREG,SPHK1,IGF1,CDK4	1307	26	13123	2.70323	1	0.451812	52.1752
GO:0046635~positive regulation of alpha-beta T cell activation	7	0.41543	0.0388998	GIMAP5,CD80,HLX,ITPKB,ADA,EBI3,SYK	1307	26	13123	2.70323	1	0.451812	52.1752
GO:0051353~positive regulation of oxidoreductase activity	7	0.41543	0.0388998	CYP27B1,HIF1A,IL1B,SCARB1,ABL1,ABL2,GCH1	1307	26	13123	2.70323	1	0.451812	52.1752
GO:0006096~glycolysis	10	0.593472	0.0397747	LDHB,LDHA,PFKL,PGM1,PGAM1,HK2,PFKP,HK1,OGDH,GAPDH	1307	47	13123	2.13629	1	0.458073	52.9781
GO:0008630~DNA damage response, signal transduction resulting in induction of apoptosis	8	0.474777	0.0405789	NUPR1,PCBP4,HIPK2,BCL3,DYRK2,IFI16,ABL1,ATM	1307	33	13123	2.43407	1	0.463629	53.7049
GO:0046496~nicotinamide nucleotide metabolic process	9	0.534125	0.0406491	NAMPT,LDHB,TP53I3,KYNU,IDH3G,PGD,KMO,HIBADH,NAPRT1	1307	40	13123	2.25912	1	0.46297	53.7678
GO:0006769~nicotinamide metabolic process	9	0.534125	0.0406491	NAMPT,LDHB,TP53I3,KYNU,IDH3G,PGD,KMO,HIBADH,NAPRT1	1307	40	13123	2.25912	1	0.46297	53.7678
GO:0001894~tissue homeostasis	12	0.712166	0.040665	P2RX4,BBS4,ADRB2,P2RX7,CTSK,LIPA,RAC2,EPAS1,TPP1,VEGFA,ACP5,COL2A1	1307	62	13123	1.94333	1	0.46186	53.7821
GO:0021700~developmental maturation	17	1.0089	0.0409765	KCNMA1,CEBPA,RET,MAEA,PTGS2,EPAS1,PPARG,TIMP1,APP,AGPAT6,HES5,EREG,CD44,ANG,VEGFA,RUNX3,ERCC2	1307	101	13123	1.68999	1	0.463223	54.0603
GO:0030001~metal ion transport	58	3.44214	0.041101	KCNJ15,ATP1B3,KCNAB1,ATOX1,KCNJ12,KCNK12,SHKBP1,SLC23A2,MCOLN1,SLC22A5,KCNQ2,COX17,NSF,KCNMA1,SLC3A2,KCTD20,TCN2,TMEM38B,ATP2C1,SLC38A1,SLC40A1,KCNMB3,ORAI1,SLC38A2,FKBP4,CAMK2G,SLC38A7,SLC38A6,SFXN4,CACNB3,KCNJ2,FTH1,TPCN1,SFXN5,TMEM37,SLC11A1,CYP27B1,SLC30A1,SLC39A8,SLC30A2,SLC30A3,SLC31A2,SLC39A3,SCO2,ITPR3,CACNA2D3,KCTD5,CACNA2D4,KCNJ5,SLC17A7,KCNJ4,P2RX4,P2RX7,ATP2A3,FYN,SLC5A6,KCTD15,ATP7B	1307	456	13123	1.27709	1	0.463023	54.1711
GO:0048545~response to steroid hormone stimulus	28	1.66172	0.04117	CCL2,PDGFB,PTGS2,IGFBP7,PPARG,PTGS1,PTEN,CITED1,CCNE1,CYP27B1,IL1B,SERPINA1,THBS1,PRKCA,KCNMA1,SOCS2,SOCS3,IL1RN,RCAN1,MMP14,MAPK1,CD38,C1QB,CDKN1A,ADM,ALDH2,PEBP1,CA2	1307	192	13123	1.46425	1	0.462365	54.2323
GO:0040012~regulation of locomotion	28	1.66172	0.04117	BBS4,PDGFB,IL16,ADORA2A,ENPP2,SNCA,ABI3,PTEN,CXCL12,ADA,CITED2,CXCR4,SCARB1,THBS1,PRKCA,PTPRM,ADAM10,IL8,PDPN,SPHK1,IGF1,MAPK1,HIF1A,CLIC4,CXCL16,VEGFA,HBEGF,TRIP6	1307	192	13123	1.46425	1	0.462365	54.2323
GO:0046638~positive regulation of alpha-beta T cell differentiation	6	0.356083	0.0422857	GIMAP5,CD80,HLX,ITPKB,ADA,SYK	1307	20	13123	3.01217	1	0.47029	55.2123
GO:0009126~purine nucleoside monophosphate metabolic process	6	0.356083	0.0422857	ATIC,CECR1,PAICS,AMPD3,ADA,IMPDH2	1307	20	13123	3.01217	1	0.47029	55.2123
GO:0032570~response to progesterone stimulus	6	0.356083	0.0422857	CCNE1,CD38,CCL2,SOCS3,ALDH2,THBS1	1307	20	13123	3.01217	1	0.47029	55.2123
GO:0030890~positive regulation of B cell proliferation	6	0.356083	0.0422857	CD38,CDKN1A,TNFSF13B,BCL6,CD40,ADA	1307	20	13123	3.01217	1	0.47029	55.2123
GO:0009167~purine ribonucleoside monophosphate metabolic process	6	0.356083	0.0422857	ATIC,CECR1,PAICS,AMPD3,ADA,IMPDH2	1307	20	13123	3.01217	1	0.47029	55.2123
GO:0046470~phosphatidylcholine metabolic process	6	0.356083	0.0422857	AGPAT6,PLA2G15,CHKB,PEMT,CHPT1,PNPLA6	1307	20	13123	3.01217	1	0.47029	55.2123
GO:0001666~response to hypoxia	21	1.24629	0.0426072	KCNMA1,CCL2,EPAS1,PDGFB,SOCS3,MMP14,ADA,SOD2,DDIT4,CITED2,CD38,HSP90B1,HIF1A,ADM,CXCR4,ANG,VEGFA,SERPINA1,PRKAA1,CASP1,THBS1	1307	134	13123	1.57352	1	0.471666	55.491
GO:0048514~blood vessel morphogenesis	30	1.78042	0.0433504	NRP1,WASF2,TNFSF12,SRF,CXCL12,PTEN,CITED1,CITED2,ARHGAP22,HEY1,CXCR4,ANG,TGM2,IL1B,ZC3H12A,TGFA,THBS1,CCM2,IL8,EPAS1,MMP19,MYH9,MMP14,NCL,PNPLA6,HIF1A,EREG,VEGFA,TNFAIP2,ACVR1	1307	210	13123	1.43436	1	0.476409	56.129
GO:0006268~DNA unwinding during replication	5	0.296736	0.0433758	TOP3A,TOP1MT,MCM2,MCM6,RAD51	1307	14	13123	3.58591	1	0.475382	56.1506
GO:0051453~regulation of intracellular pH	5	0.296736	0.0433758	CLN3,SLC11A1,ATP6V0E2,ATP6V1H,PPT1	1307	14	13123	3.58591	1	0.475382	56.1506
GO:0019884~antigen processing and presentation of exogenous antigen	5	0.296736	0.0433758	FCER1G,HLA-DOA,HLA-DMA,CD74,HLA-DRA	1307	14	13123	3.58591	1	0.475382	56.1506
GO:0045408~regulation of interleukin-6 biosynthetic process	5	0.296736	0.0433758	CEBPB,EREG,IL1B,INPP5D,TLR6	1307	14	13123	3.58591	1	0.475382	56.1506
GO:0046112~nucleobase biosynthetic process	5	0.296736	0.0433758	SHMT1,CAD,PAICS,ADA,APRT	1307	14	13123	3.58591	1	0.475382	56.1506
GO:0006144~purine base metabolic process	5	0.296736	0.0433758	SHMT1,PAICS,AMPD3,ADA,APRT	1307	14	13123	3.58591	1	0.475382	56.1506
GO:0051270~regulation of cell motion	28	1.66172	0.0435112	BBS4,NRP1,PDGFB,ENPP2,ABI3,CXCL12,PTEN,ADA,CITED2,CXCR4,SCARB1,BCL6,SEMA3A,THBS1,PTPRM,ADAM10,LYN,PDPN,SPHK1,ACTN1,IGF1,MAPK1,HIF1A,CLIC4,CXCL16,VEGFA,HBEGF,TRIP6	1307	193	13123	1.45666	1	0.475237	56.2659
GO:0003013~circulatory system process	27	1.60237	0.0447238	CYB5R3,PTGS2,ADORA2A,MYBPC3,PPARG,PTGS1,KCNJ12,CXCL12,GCH1,MTHFR,ERAP2,PCSK5,KCNMA1,CLNS1A,OLR1,TAZ,RCAN1,SERPING1,SOD2,P2RX4,ADRB2,RENBP,ADM,P2RX1,VEGFA,GAA,HTR2B	1307	185	13123	1.46538	1	0.483568	57.2852
GO:0008015~blood circulation	27	1.60237	0.0447238	CYB5R3,PTGS2,ADORA2A,MYBPC3,PPARG,PTGS1,KCNJ12,CXCL12,GCH1,MTHFR,ERAP2,PCSK5,KCNMA1,CLNS1A,OLR1,TAZ,RCAN1,SERPING1,SOD2,P2RX4,ADRB2,RENBP,ADM,P2RX1,VEGFA,GAA,HTR2B	1307	185	13123	1.46538	1	0.483568	57.2852
GO:0009820~alkaloid metabolic process	9	0.534125	0.0462708	NAMPT,LDHB,TP53I3,KYNU,IDH3G,PGD,KMO,HIBADH,NAPRT1	1307	41	13123	2.20402	1	0.494277	58.5531
GO:0034329~cell junction assembly	9	0.534125	0.0462708	CD9,TNS1,GJD3,TLN2,ITGA5,TESK2,ACTN1,LAMC1,TRIP6	1307	41	13123	2.20402	1	0.494277	58.5531
GO:0006986~response to unfolded protein	13	0.771513	0.0464657	HSP90AB1,HERPUD1,AARS,HSPA1A,HSPA1B,HSPH1,HSPA2,CREB3L2,DNAJA1,HSPD1,ERO1L,NFE2L2,DNAJB1,DNAJB6	1307	71	13123	1.83841	1	0.494527	58.7102
GO:0046365~monosaccharide catabolic process	13	0.771513	0.0464657	LDHB,LDHA,GNPDA1,PFKL,PGD,PFKP,HK2,PGAM1,HK1,OGDH,HIBADH,PGM1,GAPDH	1307	71	13123	1.83841	1	0.494527	58.7102
GO:0002705~positive regulation of leukocyte mediated immunity	8	0.474777	0.0468771	P2RX7,GIMAP5,STAT5A,PVRL2,FCER1G,IL1B,HSPD1,CD226	1307	34	13123	2.36248	1	0.496414	59.0402
GO:0002708~positive regulation of lymphocyte mediated immunity	8	0.474777	0.0468771	P2RX7,GIMAP5,STAT5A,PVRL2,FCER1G,IL1B,HSPD1,CD226	1307	34	13123	2.36248	1	0.496414	59.0402
GO:0009060~aerobic respiration	8	0.474777	0.0468771	SDHB,OXA1L,IDH3G,SUCLG2,UQCRH,ACO1,IDH2,CAT	1307	34	13123	2.36248	1	0.496414	59.0402
GO:0048520~positive regulation of behavior	8	0.474777	0.0468771	PRKCA,ADAM10,IL8,IL16,PDGFB,VEGFA,THBS1,CXCL12	1307	34	13123	2.36248	1	0.496414	59.0402
GO:0055065~metal ion homeostasis	29	1.72107	0.047068	CCL1,CCL3,GNA15,CCL2,WFS1,SLC7A8,LPAR1,CXCL12,SLC11A1,APP,CCL23,CYP27B1,CXCR4,TGM2,IL1B,PRKCA,KCNMA1,CLN3,HERPUD1,FZD2,TRIM24,ITPR3,CD38,CCL13,HSP90B1,P2RX7,ADM,ATP2C1,ATP7B	1307	203	13123	1.43436	1	0.496625	59.1924
GO:0048771~tissue remodeling	11	0.652819	0.0477119	ADRB2,CTSK,HIF1A,LIPA,RAC2,EPAS1,TPP1,VEGFA,TGM2,ACP5,MMP14	1307	56	13123	1.97225	1	0.500218	59.702
GO:0030098~lymphocyte differentiation	17	1.0089	0.0478019	GIMAP5,FLT3,STAT5A,ITPKB,IL15,TPD52,IL7R,HLA-DMA,ADA,CD74,DOCK2,RPL22,CLCF1,BCL3,BCL6,CD4,SYK	1307	103	13123	1.65718	1	0.499665	59.7728
GO:0001934~positive regulation of protein amino acid phosphorylation	15	0.890208	0.0478222	PRKCA,BMP2,LYN,IGF1,TNFRSF14,OSM,P2RX7,CD80,CCND3,CLCF1,RB1CC1,IL1B,CD4,FAM129A,SYK	1307	87	13123	1.73113	1	0.498598	59.7887
GO:0008610~lipid biosynthetic process	42	2.49258	0.0497772	TM7SF2,CYB5R3,PTGS2,CHKB,PTGS1,LTC4S,LASS5,PMVK,LASS6,CD74,MIF,PECR,AGPAT6,CYP27B1,AGPAT5,LPCAT1,ANG,SERINC1,ALOX5AP,FASN,PEMT,SCARB1,PRKAA1,AGPAT2,HSD17B8,SYK,A4GALT,TAZ,DHRS9,CHPT1,PLAUR,P2RX7,P2RX1,ADM,C5ORF4,SMPD1,MBOAT1,LTA4H,CLN8,RNPEP,SC5DL,MGST2	1307	318	13123	1.32611	1	0.511682	61.2962
GO:0009144~purine nucleoside triphosphate metabolic process	19	1.1276	0.0502953	ATP5D,ATP1B3,ATP6V1H,MYO9B,ATP5G2,ATP5G1,ADA,GCH1,NME4,ATP6V0E2,NME1-NME2,ATP2C1,ATP2A3,ATP6V0A1,C16ORF7,ATP5I,ATP5H,ATP6V0A2,ATP7B	1307	120	13123	1.58975	1	0.514181	61.6866
GO:0019216~regulation of lipid metabolic process	18	1.06825	0.0509754	KCNMA1,BBS4,GIMAP5,PDGFB,CHKB,STAT5A,IGFBP7,PPARG,SNCA,APOC1,NFKB1,PNPLA2,ACSL1,IL1B,PRKAA1,CAB39,PPAP2A,NR1H3	1307	112	13123	1.61366	1	0.517801	62.1935
GO:0032845~negative regulation of homeostatic process	6	0.356083	0.0511092	CD38,P2RX7,VEGFA,TERF2IP,INPP5D,ERCC1	1307	21	13123	2.86873	1	0.517529	62.2925
GO:0007035~vacuolar acidification	3	0.178042	0.0518084	SLC11A1,ATP6V0E2,ATP6V1H	1307	4	13123	7.53041	1	0.521226	62.8057
GO:0032288~myelin assembly	3	0.178042	0.0518084	CD9,PMP22,ERCC2	1307	4	13123	7.53041	1	0.521226	62.8057
GO:0001956~positive regulation of neurotransmitter secretion	3	0.178042	0.0518084	STX1A,ADORA2A,SNCA	1307	4	13123	7.53041	1	0.521226	62.8057
GO:0033089~positive regulation of T cell differentiation in the thymus	3	0.178042	0.0518084	VNN1,IL7R,ADA	1307	4	13123	7.53041	1	0.521226	62.8057
GO:0009206~purine ribonucleoside triphosphate biosynthetic process	16	0.949555	0.0518216	ATP5D,ATP1B3,ATP6V1H,ATP5G2,ATP5G1,NME4,ATP6V0E2,NME1-NME2,ATP2C1,ATP2A3,ATP6V0A1,C16ORF7,ATP5I,ATP5H,ATP6V0A2,ATP7B	1307	96	13123	1.67343	1	0.520105	62.8153
GO:0043368~positive T cell selection	4	0.237389	0.0522702	DOCK2,ITPKB,HLA-DMA,CD74	1307	9	13123	4.46247	1	0.522017	63.141
GO:0010884~positive regulation of lipid storage	4	0.237389	0.0522702	MSR1,CD36,NFKB1,SCARB1	1307	9	13123	4.46247	1	0.522017	63.141
GO:0009113~purine base biosynthetic process	4	0.237389	0.0522702	SHMT1,PAICS,ADA,APRT	1307	9	13123	4.46247	1	0.522017	63.141
GO:0019058~viral infectious cycle	9	0.534125	0.0523773	LRSAM1,CCL2,CXCR4,WWP1,PVRL2,CCL4L1,CCL4L2,CD4,PCSK5,BANF1	1307	42	13123	2.15155	1	0.521553	63.2184
GO:0019362~pyridine nucleotide metabolic process	9	0.534125	0.0523773	NAMPT,LDHB,TP53I3,KYNU,IDH3G,PGD,KMO,HIBADH,NAPRT1	1307	42	13123	2.15155	1	0.521553	63.2184
GO:0050868~negative regulation of T cell activation	9	0.534125	0.0523773	CBLB,IL2RA,GIMAP5,ADORA2A,HLX,BCL6,TNFRSF14,CD74,PAG1	1307	42	13123	2.15155	1	0.521553	63.2184
GO:0050900~leukocyte migration	11	0.652819	0.0529231	PRKCA,DOCK2,CCL2,IL8,IL16,PDGFB,CXCL16,S100A9,IL1B,MYH9,SYK	1307	57	13123	1.93765	1	0.524111	63.6102
GO:0002695~negative regulation of leukocyte activation	11	0.652819	0.0529231	CBLB,IL2RA,GIMAP5,ADORA2A,FLT3,HLX,BCL6,TNFRSF14,INPP5D,CD74,PAG1	1307	57	13123	1.93765	1	0.524111	63.6102
GO:0009110~vitamin biosynthetic process	7	0.41543	0.0537509	NAMPT,KYNU,CYP27B1,AKR1A1,DHRS9,KMO,NAPRT1	1307	28	13123	2.51014	1	0.528556	64.1971
GO:0006081~cellular aldehyde metabolic process	7	0.41543	0.0537509	ALDH1A1,ALDH7A1,AKR1A1,ALDH1A3,IDH2,AKR7A3,ALDH3A2	1307	28	13123	2.51014	1	0.528556	64.1971
GO:0030888~regulation of B cell proliferation	7	0.41543	0.0537509	CD38,CDKN1A,TNFSF13B,BCL6,CD40,INPP5D,ADA	1307	28	13123	2.51014	1	0.528556	64.1971
GO:0045860~positive regulation of protein kinase activity	31	1.83976	0.0540801	ADCY3,ADCY7,PDGFB,ADORA2A,PTPLAD1,FPR1,MAP4K1,LPAR1,TLR6,SDC4,CD74,SLC11A1,MAP3K6,CXCR4,ANG,IL1B,TGFA,PRKAA1,CD4,PPAP2A,THBS1,SYK,IRAK1,SPHK1,CISH,ADRB2,P2RX7,EREG,CCND3,PRKAR1A,LRP8	1307	223	13123	1.39577	1	0.529582	64.4279
GO:0042771~DNA damage response, signal transduction by p53 class mediator resulting in induction of apoptosis	5	0.296736	0.0546325	NUPR1,HIPK2,BCL3,DYRK2,IFI16	1307	15	13123	3.34685	1	0.532096	64.8121
GO:0046850~regulation of bone remodeling	5	0.296736	0.0546325	CD38,P2RX7,VEGFA,CA2,INPP5D	1307	15	13123	3.34685	1	0.532096	64.8121
GO:0045124~regulation of bone resorption	5	0.296736	0.0546325	CD38,P2RX7,VEGFA,CA2,INPP5D	1307	15	13123	3.34685	1	0.532096	64.8121
GO:0042116~macrophage activation	5	0.296736	0.0546325	SLC11A1,SNCA,TLR2,TLR6,TLR7	1307	15	13123	3.34685	1	0.532096	64.8121
GO:0045806~negative regulation of endocytosis	5	0.296736	0.0546325	LRSAM1,PACSIN2,APOC1,PTEN,NR1H3	1307	15	13123	3.34685	1	0.532096	64.8121
GO:0045453~bone resorption	5	0.296736	0.0546325	ADRB2,CTSK,RAC2,TPP1,ACP5	1307	15	13123	3.34685	1	0.532096	64.8121
GO:0060249~anatomical structure homeostasis	17	1.0089	0.0553912	BBS4,LIPA,EPAS1,ACP5,COL2A1,TERF2IP,SRF,P2RX4,P2RX7,ADRB2,CTSK,HIF1A,RAC2,TPP1,VEGFA,GAA,PARP1	1307	105	13123	1.62561	1	0.535949	65.3335
GO:0009201~ribonucleoside triphosphate biosynthetic process	16	0.949555	0.05591	ATP5D,ATP1B3,ATP6V1H,ATP5G2,ATP5G1,NME4,ATP6V0E2,NME1-NME2,ATP2C1,ATP2A3,ATP6V0A1,C16ORF7,ATP5I,ATP5H,ATP6V0A2,ATP7B	1307	97	13123	1.65617	1	0.538175	65.6857
GO:0009145~purine nucleoside triphosphate biosynthetic process	16	0.949555	0.05591	ATP5D,ATP1B3,ATP6V1H,ATP5G2,ATP5G1,NME4,ATP6V0E2,NME1-NME2,ATP2C1,ATP2A3,ATP6V0A1,C16ORF7,ATP5I,ATP5H,ATP6V0A2,ATP7B	1307	97	13123	1.65617	1	0.538175	65.6857
GO:0009124~nucleoside monophosphate biosynthetic process	10	0.593472	0.0560875	ADCY3,ADCY7,ADM,ADORA2A,ATIC,CECR1,PAICS,AMPD3,ADA,IMPDH2	1307	50	13123	2.00811	1	0.538148	65.8055
GO:0043549~regulation of kinase activity	46	2.72997	0.0566656	ADCY3,PDGFB,SNX6,ADCY7,ADORA2A,PTPLAD1,FPR1,MAP4K1,LPAR1,TLR6,SDC4,PTEN,CD74,CDC37,MAP3K6,SLC11A1,APP,CXCR4,ANG,CDKN2D,PPP2CA,SPRED2,TGFA,IL1B,CD4,CDK5RAP3,PRKAA1,SPRED1,PPAP2A,THBS1,SERTAD1,SYK,PRKCA,IRAK1,SPHK1,CISH,P2RX7,YWHAG,ADRB2,CDKN1A,NUP62,CCND3,EREG,PRKAR1A,LRP8,DUSP6	1307	357	13123	1.29374	1	0.540729	66.1927
GO:0051223~regulation of protein transport	18	1.06825	0.0585729	SERGEF,ADORA2A,NFKBIE,G3BP2,NFKBIA,CD40,MXI1,PRDX1,P2RX7,ANG,PYCARD,BCL3,IL1B,TRIP6,CASP1,IL1A,SRGN,LCP1	1307	114	13123	1.58535	1	0.551769	67.4411
GO:0006029~proteoglycan metabolic process	9	0.534125	0.058978	C4ORF31,GAL3ST4,NDST1,SULF2,NDST2,CHST13,IGF1,COL2A1,DSE	1307	43	13123	2.10151	1	0.553136	67.7006
GO:0034599~cellular response to oxidative stress	9	0.534125	0.058978	HIF1A,EPAS1,PRDX6,SNCA,PRDX5,CAT,ETV5,PRDX1,SOD2	1307	43	13123	2.10151	1	0.553136	67.7006
GO:0006413~translational initiation	9	0.534125	0.058978	EIF3D,EIF4E3,DMXL2,RPS17,EIF3E,EIF2S3,RPS5,EIF3M,RPS3	1307	43	13123	2.10151	1	0.553136	67.7006
GO:0030218~erythrocyte differentiation	9	0.534125	0.058978	DNASE2,MAEA,EPAS1,LYN,RPS14,VEGFA,BCL6,TIMP1,ERCC2	1307	43	13123	2.10151	1	0.553136	67.7006
GO:0007599~hemostasis	17	1.0089	0.0594821	F12,ADORA2A,F13A1,GNA12,HPS4,PABPC4,MST1,SERPING1,CD40,PLAUR,CD9,PLSCR1,CD36,P2RX1,TFPI,SERPINA1,PAPSS2	1307	106	13123	1.61028	1	0.55511	68.0208
GO:0009123~nucleoside monophosphate metabolic process	12	0.712166	0.0599519	ADCY3,ADCY7,ADM,ADORA2A,ATIC,CECR1,PDE4D,PAICS,AMPD3,C6ORF108,ADA,IMPDH2	1307	66	13123	1.82555	1	0.556852	68.3164
GO:0051272~positive regulation of cell motion	16	0.949555	0.0602144	ADAM10,PDGFB,LYN,PDPN,SPHK1,IGF1,CXCL12,MAPK1,HIF1A,CXCL16,VEGFA,HBEGF,SCARB1,BCL6,TRIP6,THBS1	1307	98	13123	1.63927	1	0.557296	68.4805
GO:0042035~regulation of cytokine biosynthetic process	13	0.771513	0.0606959	CEBPB,STAT5A,TLR6,TLR7,CD80,EREG,BCL3,IL1B,CD4,INPP5D,IL1A,EBI3,SYK	1307	74	13123	1.76388	1	0.559085	68.7794
GO:0043542~endothelial cell migration	6	0.356083	0.0609265	PRSS3,SCARB1,TNFSF12,MYH9,SRF,PTEN	1307	22	13123	2.73833	1	0.559324	68.9216
GO:0015807~L-amino acid transport	6	0.356083	0.0609265	SLC11A1,SERINC1,SLC7A8,SLC7A5,CLN8,SLC43A2	1307	22	13123	2.73833	1	0.559324	68.9216
GO:0002366~leukocyte activation during immune response	8	0.474777	0.0612549	SLC11A1,LYN,TLR2,BCL3,TLR6,TLR7,ADA,LCP1	1307	36	13123	2.23123	1	0.560157	69.123
GO:0002263~cell activation during immune response	8	0.474777	0.0612549	SLC11A1,LYN,TLR2,BCL3,TLR6,TLR7,ADA,LCP1	1307	36	13123	2.23123	1	0.560157	69.123
GO:0031348~negative regulation of defense response	8	0.474777	0.0612549	ADRB2,IL2RA,SERPINF1,ADORA2A,AOAH,PPARG,SERPING1,ADA	1307	36	13123	2.23123	1	0.560157	69.123
GO:0009166~nucleotide catabolic process	10	0.593472	0.0623616	ATP5D,UPP1,PDE4D,MYO9B,ENTPD4,AMPD3,C6ORF108,ADA,GCH1,NT5C	1307	51	13123	1.96874	1	0.565677	69.7928
GO:0032535~regulation of cellular component size	36	2.1365	0.0624512	NRP1,PDGFB,PPARG,PPT1,IL7R,CXCL12,DSTN,ACVR1B,APP,CDC42EP2,LAMB2,CYP27B1,NUBP1,CDKN2D,RB1CC1,PPP2CA,BCL6,SEMA3A,SERTAD1,ADAM10,SPHK1,SLC3A2,CDK4,VAT1,CD38,CDKN1A,ATP6V0E2,NUPR1,BTG1,CXCL16,CYFIP1,HBEGF,DCUN1D3,C6ORF108,CLN8,SPTAN1	1307	270	13123	1.33874	1	0.565047	69.8464
GO:0009205~purine ribonucleoside triphosphate metabolic process	18	1.06825	0.0626502	ATP5D,ATP1B3,ATP6V1H,MYO9B,ATP5G2,ATP5G1,GCH1,NME4,ATP6V0E2,NME1-NME2,ATP2C1,ATP2A3,ATP6V0A1,C16ORF7,ATP5I,ATP5H,ATP6V0A2,ATP7B	1307	115	13123	1.57156	1	0.565075	69.9651
GO:0032989~cellular component morphogenesis	50	2.96736	0.0630205	NRP1,MYO7A,CXCL12,CITED1,RAB3IP,APP,CXCR4,SEMA3A,IDUA,PRKCA,PTPRM,EGR2,PDPN,BAIAP2,CCL4L1,CCL4L2,MYH9,VASP,MARK2,SS18,SLITRK4,NDEL1,HIF1A,ADM,VCAN,LAMC1,PMP22,BBS4,LIMS1,ADORA2A,BRSK1,IL7R,LLGL1,EPHB2,ALCAM,FIS1,CD9,DOCK2,LAMB2,LHX2,BCL6,RUNX3,ERCC2,BMP2,LIPA,TRIM28,AFG3L2,CAPN3,P2RX7,MYH11,CYFIP1	1307	396	13123	1.26775	1	0.566121	70.185
GO:0010608~posttranscriptional regulation of gene expression	29	1.72107	0.0636945	EIF4E3,METAP1,HPS4,EIF2A,PTEN,YBX1,ZFP36L2,SLC11A1,APP,MOV10,TNRC6C,ANG,EIF3E,SND1,BCL3,FAM129A,THBS1,PRKCA,ZCCHC11,ACO1,CDK4,RPS4X,RPS5,EIF4G1,EIF4B,MAPK1,EIF4G2,VEGFA,HSPD1	1307	209	13123	1.39319	1	0.56895	70.5811
GO:0015992~proton transport	11	0.652819	0.0644413	ATP5D,ATP6V0E2,ATP6V1H,ATP6V0A1,ATP5G2,ATP6V1G2,C16ORF7,ATP5G1,ATP5I,ATP5H,ATP6V0A2	1307	59	13123	1.87197	1	0.572171	71.0144
GO:0043405~regulation of MAP kinase activity	21	1.24629	0.0661663	PRKCA,PDGFB,PTPLAD1,FPR1,MAP4K1,LPAR1,TLR6,CD74,MAP3K6,P2RX7,NUP62,CXCR4,PPP2CA,SPRED2,IL1B,TGFA,PRKAA1,SPRED1,THBS1,DUSP6,SYK	1307	141	13123	1.4954	1	0.580962	71.992
GO:0051174~regulation of phosphorus metabolic process	59	3.50148	0.0664571	ADCY3,C13ORF18,ADCY7,PDGFB,LPAR1,TLR6,SDC4,PTEN,MAP3K6,APP,ANG,CXCR4,CLCF1,CDKN2D,SPRED2,TGFA,IL1B,CDK5RAP3,SPRED1,FAM129A,SERTAD1,SYK,PRKCA,IRAK1,LYN,SOCS3,TNFRSF14,OSM,ADRB2,CCND3,CD80,EREG,PEBP1,SNX6,ADORA2A,PTPLAD1,FPR1,MAP4K1,CD74,CDC37,SLC11A1,PPP2CA,RB1CC1,CD4,PRKAA1,PPAP2A,THBS1,BMP2,SPHK1,IGF1,RCAN1,CISH,YWHAG,P2RX7,CDKN1A,NUP62,PRKAR1A,LRP8,DUSP6	1307	480	13123	1.23415	1	0.581465	72.1537
GO:0019220~regulation of phosphate metabolic process	59	3.50148	0.0664571	ADCY3,C13ORF18,ADCY7,PDGFB,LPAR1,TLR6,SDC4,PTEN,MAP3K6,APP,ANG,CXCR4,CLCF1,CDKN2D,SPRED2,TGFA,IL1B,CDK5RAP3,SPRED1,FAM129A,SERTAD1,SYK,PRKCA,IRAK1,LYN,SOCS3,TNFRSF14,OSM,ADRB2,CCND3,CD80,EREG,PEBP1,SNX6,ADORA2A,PTPLAD1,FPR1,MAP4K1,CD74,CDC37,SLC11A1,PPP2CA,RB1CC1,CD4,PRKAA1,PPAP2A,THBS1,BMP2,SPHK1,IGF1,RCAN1,CISH,YWHAG,P2RX7,CDKN1A,NUP62,PRKAR1A,LRP8,DUSP6	1307	480	13123	1.23415	1	0.581465	72.1537
GO:0009199~ribonucleoside triphosphate metabolic process	18	1.06825	0.0669171	ATP5D,ATP1B3,ATP6V1H,MYO9B,ATP5G2,ATP5G1,GCH1,NME4,ATP6V0E2,NME1-NME2,ATP2C1,ATP2A3,ATP6V0A1,C16ORF7,ATP5I,ATP5H,ATP6V0A2,ATP7B	1307	116	13123	1.55802	1	0.58292	72.4077
GO:0051412~response to corticosterone stimulus	5	0.296736	0.0673058	PRKCA,CCNE1,CDKN1A,PTGS1,PEBP1	1307	16	13123	3.13767	1	0.583963	72.6206
GO:0007009~plasma membrane organization	5	0.296736	0.0673058	PLSCR1,P2RX7,A4GALT,DYSF,PLSCR3	1307	16	13123	3.13767	1	0.583963	72.6206
GO:0032088~negative regulation of NF-kappaB transcription factor activity	5	0.296736	0.0673058	IRAK2,IRAK1,NFKBIA,CAT,RPS3	1307	16	13123	3.13767	1	0.583963	72.6206
GO:0001959~regulation of cytokine-mediated signaling pathway	5	0.296736	0.0673058	IRAK2,HSP90AB1,IRAK1,CDC37,AGPAT2	1307	16	13123	3.13767	1	0.583963	72.6206
GO:0030641~regulation of cellular pH	5	0.296736	0.0673058	CLN3,SLC11A1,ATP6V0E2,ATP6V1H,PPT1	1307	16	13123	3.13767	1	0.583963	72.6206
GO:0042325~regulation of phosphorylation	57	3.38279	0.067931	ADCY3,ADCY7,PDGFB,LPAR1,TLR6,SDC4,PTEN,MAP3K6,APP,ANG,CXCR4,CLCF1,CDKN2D,SPRED2,IL1B,TGFA,CDK5RAP3,SPRED1,FAM129A,SERTAD1,SYK,PRKCA,IRAK1,LYN,SOCS3,TNFRSF14,OSM,ADRB2,CCND3,CD80,EREG,PEBP1,SNX6,ADORA2A,PTPLAD1,FPR1,MAP4K1,CD74,CDC37,SLC11A1,PPP2CA,RB1CC1,CD4,PRKAA1,PPAP2A,THBS1,BMP2,SPHK1,IGF1,CISH,YWHAG,P2RX7,CDKN1A,NUP62,PRKAR1A,LRP8,DUSP6	1307	462	13123	1.23877	1	0.586316	72.9597
GO:0042255~ribosome assembly	4	0.237389	0.0692946	NIP7,RPS14,RPS15,EIF2A	1307	10	13123	4.01622	1	0.592704	73.6858
GO:0034104~negative regulation of tissue remodeling	4	0.237389	0.0692946	CD38,P2RX7,VEGFA,INPP5D	1307	10	13123	4.01622	1	0.592704	73.6858
GO:0001953~negative regulation of cell-matrix adhesion	4	0.237389	0.0692946	BCL6,MMP14,THBS1,PTEN	1307	10	13123	4.01622	1	0.592704	73.6858
GO:0006940~regulation of smooth muscle contraction	8	0.474777	0.0693497	KCNMA1,ADRB2,PTGS2,P2RX1,PTGS1,SPHK1,SRF,ADA	1307	37	13123	2.17093	1	0.591868	73.7148
GO:0001667~ameboidal cell migration	8	0.474777	0.0693497	ZFAND5,RET,HIF1A,CXCR4,ARID5B,WASF2,CXCL12,ACVR1	1307	37	13123	2.17093	1	0.591868	73.7148
GO:0007259~JAK-STAT cascade	8	0.474777	0.0693497	OSM,CCL2,SOCS2,SOCS3,CLCF1,STAT5A,STAT2,IFNAR1	1307	37	13123	2.17093	1	0.591868	73.7148
GO:0007596~blood coagulation	16	0.949555	0.0694854	F12,ADORA2A,F13A1,GNA12,PABPC4,MST1,SERPING1,CD40,PLAUR,CD9,PLSCR1,CD36,P2RX1,TFPI,SERPINA1,PAPSS2	1307	100	13123	1.60649	1	0.591475	73.7859
GO:0009142~nucleoside triphosphate biosynthetic process	16	0.949555	0.0694854	ATP5D,ATP1B3,ATP6V1H,ATP5G2,ATP5G1,NME4,ATP6V0E2,NME1-NME2,ATP2C1,ATP2A3,ATP6V0A1,C16ORF7,ATP5I,ATP5H,ATP6V0A2,ATP7B	1307	100	13123	1.60649	1	0.591475	73.7859
GO:0050817~coagulation	16	0.949555	0.0694854	F12,ADORA2A,F13A1,GNA12,PABPC4,MST1,SERPING1,CD40,PLAUR,CD9,PLSCR1,CD36,P2RX1,TFPI,SERPINA1,PAPSS2	1307	100	13123	1.60649	1	0.591475	73.7859
GO:0009991~response to extracellular stimulus	30	1.78042	0.0708486	KYNU,LDHA,CCL2,PTGS2,IGFBP7,PPARG,PTEN,ASGR1,CCNE1,CYP27B1,AES,ACSL1,CD44,MAP1LC3A,CDKN2D,PEMT,IL1B,MUC1,SUOX,CLN3,BMP2,LYN,GATM,SOCS3,SOD2,CD38,CDKN1A,P2RX7,ADM,ATG4C	1307	220	13123	1.36917	1	0.59772	74.4908
GO:0016032~viral reproduction	12	0.712166	0.0715316	CCL1,LRSAM1,CCL2,CCL4L1,CCL4L2,BANF1,CXCR4,WWP1,PVRL2,HIPK2,THOC6,CD4,PCSK5	1307	68	13123	1.77186	1	0.60024	74.8372
GO:0042990~regulation of transcription factor import into nucleus	7	0.41543	0.0716069	NFKBIE,G3BP2,NFKBIA,BCL3,TRIP6,MXI1,PRDX1	1307	30	13123	2.3428	1	0.599514	74.875
GO:0032649~regulation of interferon-gamma production	7	0.41543	0.0716069	SLC11A1,GIMAP5,BCL3,HSPD1,TLR7,EBI3,IFNAR1	1307	30	13123	2.3428	1	0.599514	74.875
GO:0009156~ribonucleoside monophosphate biosynthetic process	6	0.356083	0.0717339	ATIC,CECR1,PAICS,AMPD3,ADA,IMPDH2	1307	23	13123	2.61927	1	0.599065	74.9389
GO:0045727~positive regulation of translation	6	0.356083	0.0717339	MAPK1,BCL3,RPS4X,CDK4,THBS1,FAM129A	1307	23	13123	2.61927	1	0.599065	74.9389
GO:0030004~cellular monovalent inorganic cation homeostasis	6	0.356083	0.0717339	KCNMA1,CLN3,SLC11A1,ATP6V0E2,ATP6V1H,PPT1	1307	23	13123	2.61927	1	0.599065	74.9389
GO:0007044~cell-substrate junction assembly	6	0.356083	0.0717339	TNS1,ITGA5,TESK2,ACTN1,LAMC1,TRIP6	1307	23	13123	2.61927	1	0.599065	74.9389
GO:0042558~pteridine and derivative metabolic process	6	0.356083	0.0717339	MTHFD2,SHMT1,GPHN,PCBD1,QDPR,GCH1	1307	23	13123	2.61927	1	0.599065	74.9389
GO:0055074~calcium ion homeostasis	26	1.54303	0.0740644	CCL1,CCL3,GNA15,CCL2,WFS1,LPAR1,CXCL12,APP,CCL23,CYP27B1,CXCR4,TGM2,IL1B,PRKCA,CLN3,HERPUD1,FZD2,TRIM24,ITPR3,CD38,CCL13,HSP90B1,P2RX7,ADM,ATP2C1,ATP7B	1307	186	13123	1.40352	1	0.610129	76.0831
GO:0005996~monosaccharide metabolic process	30	1.78042	0.0741465	LDHB,LDHA,GNPDA1,SLC37A4,PGD,PGAM1,HK2,HK1,NAGK,OGDH,HIBADH,GALK1,ST3GAL2,AKR1A1,PRKAA1,GAPDH,PFKL,GMDS,PDK3,PFKP,GALT,FBP1,AMDHD2,MAN2C1,RENBP,ATF3,PGM1,GAA,UGP2,PYGB	1307	221	13123	1.36297	1	0.609435	76.1225
GO:0006006~glucose metabolic process	22	1.30564	0.0761691	LDHB,LDHA,PFKL,PDK3,SLC37A4,PGD,PGAM1,HK2,GALT,FBP1,PFKP,HK1,OGDH,HIBADH,ATF3,AKR1A1,PGM1,GAA,PRKAA1,GAPDH,UGP2,PYGB	1307	152	13123	1.45324	1	0.618605	77.0738
GO:0030162~regulation of proteolysis	10	0.593472	0.0762004	HSP90AB1,CLN3,F12,IDE,IL1B,SERPING1,THBS1,CLN8,PLAUR,TIMP1	1307	53	13123	1.89444	1	0.617649	77.0883
GO:0022415~viral reproductive process	11	0.652819	0.0774546	LRSAM1,CCL2,CXCR4,WWP1,HIPK2,PVRL2,THOC6,CCL4L1,CCL4L2,CD4,PCSK5,BANF1	1307	61	13123	1.81059	1	0.62279	77.6597
GO:0030100~regulation of endocytosis	11	0.652819	0.0774546	PRKCA,SLC11A1,LRSAM1,PACSIN2,SNCA,APOC1,PPT1,SCARB1,BIN1,PTEN,NR1H3	1307	61	13123	1.81059	1	0.62279	77.6597
GO:0019320~hexose catabolic process	12	0.712166	0.0778212	LDHB,LDHA,PFKL,PGM1,PGD,PGAM1,HK2,PFKP,HK1,OGDH,GAPDH,HIBADH	1307	69	13123	1.74618	1	0.623492	77.8242
GO:0051241~negative regulation of multicellular organismal process	23	1.36499	0.0778268	PRKCA,KCNMA1,F12,GIMAP5,PDGFB,PTGS2,LGMN,PPARG,APOC1,NFKB1,ADA,LRPAP1,P2RX4,CD38,SLC11A1,P2RX7,ADRB2,ADM,VEGFA,BCL6,INPP5D,THBS1,SRGN	1307	161	13123	1.43436	1	0.622417	77.8267
GO:0042552~myelination	8	0.474777	0.0780521	CD9,EGR2,NAB2,NAB1,PMP22,AFG3L2,MBP,ERCC2	1307	38	13123	2.1138	1	0.622425	77.9272
GO:0032270~positive regulation of cellular protein metabolic process	31	1.83976	0.07814	PSMB10,NFKBIA,CDC16,CLCF1,RB1CC1,ATG7,PEMT,IL1B,BCL3,CD4,THBS1,FAM129A,SYK,NR1H3,PRKCA,F12,BMP2,LYN,IGF1,TNFRSF14,CDK4,RPS4X,PSMB8,PSMB9,OSM,MAPK1,P2RX7,PSMA6,CD80,CCND3,LRRK2	1307	231	13123	1.34743	1	0.62176	77.9663
GO:0033674~positive regulation of kinase activity	31	1.83976	0.07814	ADCY3,ADCY7,PDGFB,ADORA2A,PTPLAD1,FPR1,MAP4K1,LPAR1,TLR6,SDC4,CD74,SLC11A1,MAP3K6,CXCR4,ANG,IL1B,TGFA,PRKAA1,CD4,PPAP2A,THBS1,SYK,IRAK1,SPHK1,CISH,ADRB2,P2RX7,EREG,CCND3,PRKAR1A,LRP8	1307	231	13123	1.34743	1	0.62176	77.9663
GO:0051347~positive regulation of transferase activity	32	1.89911	0.0786385	ADCY3,ADCY7,PDGFB,ADORA2A,PTPLAD1,FPR1,MAP4K1,LPAR1,TLR6,SDC4,CD74,SLC11A1,MAP3K6,CXCR4,ANG,SERINC1,IL1B,TGFA,PRKAA1,CD4,PPAP2A,THBS1,SYK,IRAK1,SPHK1,CISH,ADRB2,P2RX7,EREG,CCND3,PRKAR1A,LRP8	1307	240	13123	1.33874	1	0.623104	78.1867
GO:0048511~rhythmic process	19	1.1276	0.0786928	KCNMA1,BMP2,EGR2,MAT2A,HS3ST2,STAT5A,CDK4,MMP14,ADA,CCNE1,EREG,DBP,ANG,VEGFA,HEBP1,PER3,NFIL3,LFNG,ATP7B	1307	127	13123	1.50213	1	0.622279	78.2106
GO:0001932~regulation of protein amino acid phosphorylation	24	1.42433	0.0792772	PRKCA,BMP2,LYN,PDGFB,SOCS3,PTPLAD1,MAP4K1,IGF1,TNFRSF14,TLR6,OSM,MAP3K6,P2RX7,CD80,CCND3,CLCF1,RB1CC1,PPP2CA,PRKAR1A,PEBP1,IL1B,CD4,FAM129A,SYK	1307	170	13123	1.41749	1	0.624028	78.4661
GO:0046394~carboxylic acid biosynthetic process	22	1.30564	0.0804048	BCAT1,SHMT1,KYNU,MAT2A,PTGS2,PTGS1,LTC4S,CD74,MIF,PECR,AKR1A1,C5ORF4,ALOX5AP,FASN,LTA4H,PRKAA1,AGPAT2,SC5DL,RNPEP,UGP2,MGST2,SYK	1307	153	13123	1.44374	1	0.628362	78.9512
GO:0051098~regulation of binding	22	1.30564	0.0804048	IRAK2,IRAK1,PCBD1,CALD1,TLR2,NFKBIA,TMEM189,TAF6L,RPS3,LRPAP1,ADRB2,AES,NME1-NME2,HIPK2,PYCARD,CALM3,BCL3,IL1B,ID3,CAT,APEX1,ERCC2	1307	153	13123	1.44374	1	0.628362	78.9512
GO:0016053~organic acid biosynthetic process	22	1.30564	0.0804048	BCAT1,SHMT1,KYNU,MAT2A,PTGS2,PTGS1,LTC4S,CD74,MIF,PECR,AKR1A1,C5ORF4,ALOX5AP,FASN,LTA4H,PRKAA1,AGPAT2,SC5DL,RNPEP,UGP2,MGST2,SYK	1307	153	13123	1.44374	1	0.628362	78.9512
GO:0052166~positive regulation by symbiont of host innate immunity	3	0.178042	0.0807278	TLR2,TLR6,TLR7	1307	5	13123	6.02433	1	0.628821	79.0882
GO:0052305~positive regulation by organism of innate immunity in other organism during symbiotic interaction	3	0.178042	0.0807278	TLR2,TLR6,TLR7	1307	5	13123	6.02433	1	0.628821	79.0882
GO:0030224~monocyte differentiation	3	0.178042	0.0807278	PPARG,IFI16,MYH9	1307	5	13123	6.02433	1	0.628821	79.0882
GO:0052167~modulation by symbiont of host innate immunity	3	0.178042	0.0807278	TLR2,TLR6,TLR7	1307	5	13123	6.02433	1	0.628821	79.0882
GO:0052555~positive regulation by organism of immune response of other organism during symbiotic interaction	3	0.178042	0.0807278	TLR2,TLR6,TLR7	1307	5	13123	6.02433	1	0.628821	79.0882
GO:0010886~positive regulation of cholesterol storage	3	0.178042	0.0807278	MSR1,CD36,SCARB1	1307	5	13123	6.02433	1	0.628821	79.0882
GO:0052553~modulation by symbiont of host immune response	3	0.178042	0.0807278	TLR2,TLR6,TLR7	1307	5	13123	6.02433	1	0.628821	79.0882
GO:0052306~modulation by organism of innate immunity in other organism during symbiotic interaction	3	0.178042	0.0807278	TLR2,TLR6,TLR7	1307	5	13123	6.02433	1	0.628821	79.0882
GO:0002282~microglial cell activation during immune response	3	0.178042	0.0807278	TLR2,TLR6,TLR7	1307	5	13123	6.02433	1	0.628821	79.0882
GO:0052552~modulation by organism of immune response of other organism during symbiotic interaction	3	0.178042	0.0807278	TLR2,TLR6,TLR7	1307	5	13123	6.02433	1	0.628821	79.0882
GO:0002634~regulation of germinal center formation	3	0.178042	0.0807278	TNFSF13B,BCL6,ADA	1307	5	13123	6.02433	1	0.628821	79.0882
GO:0030853~negative regulation of granulocyte differentiation	3	0.178042	0.0807278	INPP5D,RUNX1,C1QC	1307	5	13123	6.02433	1	0.628821	79.0882
GO:0051895~negative regulation of focal adhesion formation	3	0.178042	0.0807278	MMP14,THBS1,PTEN	1307	5	13123	6.02433	1	0.628821	79.0882
GO:0052556~positive regulation by symbiont of host immune response	3	0.178042	0.0807278	TLR2,TLR6,TLR7	1307	5	13123	6.02433	1	0.628821	79.0882
GO:0046466~membrane lipid catabolic process	5	0.296736	0.0813543	GM2A,SMPDL3A,SPHK1,SMPD1,PPT1	1307	17	13123	2.9531	1	0.630711	79.3516
GO:0010043~response to zinc ion	5	0.296736	0.0813543	P2RX7,D2HGDH,CA2,PTEN,ATP7B	1307	17	13123	2.9531	1	0.630711	79.3516
GO:0030149~sphingolipid catabolic process	5	0.296736	0.0813543	GM2A,SMPDL3A,SPHK1,SMPD1,PPT1	1307	17	13123	2.9531	1	0.630711	79.3516
GO:0006084~acetyl-CoA metabolic process	7	0.41543	0.0816651	SDHB,ACSS1,KYNU,IDH3G,SUCLG2,ACO1,IDH2	1307	31	13123	2.26722	1	0.631101	79.481
GO:0050728~negative regulation of inflammatory response	7	0.41543	0.0816651	ADRB2,IL2RA,SERPINF1,ADORA2A,AOAH,PPARG,ADA	1307	31	13123	2.26722	1	0.631101	79.481
GO:0030148~sphingolipid biosynthetic process	7	0.41543	0.0816651	P2RX7,A4GALT,P2RX1,SMPD1,LASS5,LASS6,CLN8	1307	31	13123	2.26722	1	0.631101	79.481
GO:0002455~humoral immune response mediated by circulating immunoglobulin	7	0.41543	0.0816651	C1QA,C1QB,C1RL,BCL3,SERPING1,C2,C1QC	1307	31	13123	2.26722	1	0.631101	79.481
GO:0001816~cytokine production	9	0.534125	0.0818013	SLC11A1,NLRC4,LIPA,LYN,CD4,HSPD1,CD226,PCSK5,IFNAR1	1307	46	13123	1.96446	1	0.63067	79.5376
GO:0009119~ribonucleoside metabolic process	9	0.534125	0.0818013	NME4,MAT2A,NME1-NME2,UPP1,PEMT,ENTPD4,TPMT,ADA,APRT	1307	46	13123	1.96446	1	0.63067	79.5376
GO:0050795~regulation of behavior	9	0.534125	0.0818013	PRKCA,ADAM10,IL8,IL16,PDGFB,VEGFA,THBS1,CXCL12,ADA	1307	46	13123	1.96446	1	0.63067	79.5376
GO:0032355~response to estradiol stimulus	10	0.593472	0.0837706	PRKCA,CCNE1,CD38,SOCS2,PTGS2,PDGFB,SOCS3,IL1B,SERPINA1,PTEN	1307	54	13123	1.85936	1	0.638742	80.3383
GO:0050905~neuromuscular process	11	0.652819	0.0845295	KCNMA1,CLN3,APP,GM2A,TPP1,ADORA2A,MYO7A,AARS,GAA,CLN8,GCH1	1307	62	13123	1.78139	1	0.641145	80.6388
GO:0045454~cell redox homeostasis	11	0.652819	0.0845295	SEPW1,TXNDC11,PRDX6,TXNDC5,DNAJC10,PDIA6,PRDX5,PRDX1,APEX1,QSOX1,SCO2	1307	62	13123	1.78139	1	0.641145	80.6388
GO:0015031~protein transport	87	5.1632	0.0850454	GNPTG,NPEPL1,TSPO,MSR1,RAB9A,AP1G2,AP1B1,XPO6,CHMP5,XPO5,MLPH,ZMAT3,HPS4,PPARG,VPS37C,CANX,HLA-DMA,RAB3IP,NLRC4,HOMER3,ATG7,AP3B2,RAB21,NSF,KIF13B,SCAMP1,MCM3AP,STX1A,RPGR,LYN,ERP29,MYH9,TIMM44,MAPK1,CD36,ATG4C,TNFSF13B,STXBP5,TOMM20,RAB5A,SORT1,TOM1,RAB13,SNX10,MVP,ARFGAP3,SDAD1,SNX6,RAB40C,NFKBIA,PPT1,CTSA,CDC37,RAB40B,CD74,SLC11A1,NUP214,TRAM2,BCL3,BCL6,DOPEY2,SCG5,STX11,PCSK5,FAM125B,SYS1,LRS…	1307	749	13123	1.16626	1	0.642423	80.8407
GO:0042102~positive regulation of T cell proliferation	8	0.474777	0.0873602	IL2RA,TNFSF13B,CD80,STAT5A,IL1B,IL15,EBI3,SYK	1307	39	13123	2.0596	1	0.651695	81.722
GO:0045596~negative regulation of cell differentiation	29	1.72107	0.0878765	TWSG1,NRP1,STAT5A,EZH2,PPARG,NFKBIA,C1QC,TTC3,CD74,MBP,EPHB2,HLX,BCL6,SEMA3A,INPP5D,RUNX1,NR1H3,ZCCHC11,FLT3,IGF1,RCAN1,SOD2,NOTCH3,MAPK1,ATF5,NME1-NME2,EREG,HES5,TOB1	1307	216	13123	1.34804	1	0.652907	81.9133
GO:0009141~nucleoside triphosphate metabolic process	19	1.1276	0.0884344	ATP5D,ATP1B3,ATP6V1H,MYO9B,ATP5G2,ATP5G1,ADA,GCH1,NME4,ATP6V0E2,NME1-NME2,ATP2C1,ATP2A3,ATP6V0A1,C16ORF7,ATP5I,ATP5H,ATP6V0A2,ATP7B	1307	129	13123	1.47884	1	0.654292	82.1179
GO:0032729~positive regulation of interferon-gamma production	4	0.237389	0.0884604	SLC11A1,BCL3,HSPD1,IFNAR1	1307	11	13123	3.65111	1	0.653357	82.1274
GO:0010812~negative regulation of cell-substrate adhesion	4	0.237389	0.0884604	BCL6,MMP14,THBS1,PTEN	1307	11	13123	3.65111	1	0.653357	82.1274
GO:0009650~UV protection	4	0.237389	0.0884604	CAT,ERCC1,TUBB3,ERCC2	1307	11	13123	3.65111	1	0.653357	82.1274
GO:0046457~prostanoid biosynthetic process	4	0.237389	0.0884604	PTGS2,PTGS1,CD74,MIF	1307	11	13123	3.65111	1	0.653357	82.1274
GO:0002714~positive regulation of B cell mediated immunity	4	0.237389	0.0884604	GIMAP5,PVRL2,FCER1G,CD226	1307	11	13123	3.65111	1	0.653357	82.1274
GO:0042274~ribosomal small subunit biogenesis	4	0.237389	0.0884604	RPS17,RPS14,RPS15,RPS6	1307	11	13123	3.65111	1	0.653357	82.1274
GO:0032370~positive regulation of lipid transport	4	0.237389	0.0884604	P2RX4,P2RX7,NFKBIA,NR1H3	1307	11	13123	3.65111	1	0.653357	82.1274
GO:0031663~lipopolysaccharide-mediated signaling pathway	4	0.237389	0.0884604	IRAK2,IRAK1,MAPK1,NFKBIA	1307	11	13123	3.65111	1	0.653357	82.1274
GO:0002891~positive regulation of immunoglobulin mediated immune response	4	0.237389	0.0884604	GIMAP5,PVRL2,FCER1G,CD226	1307	11	13123	3.65111	1	0.653357	82.1274
GO:0042994~cytoplasmic sequestering of transcription factor	4	0.237389	0.0884604	NFKBIE,G3BP2,NFKBIA,MXI1	1307	11	13123	3.65111	1	0.653357	82.1274
GO:0001516~prostaglandin biosynthetic process	4	0.237389	0.0884604	PTGS2,PTGS1,CD74,MIF	1307	11	13123	3.65111	1	0.653357	82.1274
GO:0006754~ATP biosynthetic process	14	0.830861	0.0887944	ATP5D,ATP1B3,ATP6V1H,ATP5G2,ATP5G1,ATP6V0E2,ATP2A3,ATP2C1,ATP6V0A1,C16ORF7,ATP5I,ATP5H,ATP6V0A2,ATP7B	1307	87	13123	1.61572	1	0.653762	82.2487
GO:0043193~positive regulation of gene-specific transcription	14	0.830861	0.0887944	CEBPA,MEF2C,TESC,TRIM28,PPARG,SPI1,IGF1,NFKBIA,SRF,CITED2,HIF1A,HES5,SMARCA2,NR1H3	1307	87	13123	1.61572	1	0.653762	82.2487
GO:0009100~glycoprotein metabolic process	27	1.60237	0.0905342	GNPTG,GALNT1,GAL3ST4,NDST1,NDST2,ALG3,IDE,TSPAN7,COL2A1,DSE,C4ORF31,ST3GAL2,POMT1,CHST13,CD4,TNIP1,PHLDA1,CLN3,ST6GAL1,LIPA,IGF1,MAN1C1,ST6GALNAC2,MGAT1,CD37,HIF1A,SULF2	1307	199	13123	1.36229	1	0.660188	82.8683
GO:0070201~regulation of establishment of protein localization	18	1.06825	0.0911749	SERGEF,ADORA2A,NFKBIE,G3BP2,NFKBIA,CD40,MXI1,PRDX1,P2RX7,ANG,PYCARD,BCL3,IL1B,TRIP6,CASP1,IL1A,SRGN,LCP1	1307	121	13123	1.49364	1	0.661864	83.0913
GO:0006937~regulation of muscle contraction	12	0.712166	0.0914103	PRKCA,KCNMA1,P2RX4,ADRB2,PTGS2,P2RX1,MYBPC3,PTGS1,SPHK1,SDC4,SRF,ADA	1307	71	13123	1.69699	1	0.661822	83.1726
GO:0045765~regulation of angiogenesis	11	0.652819	0.0919846	PTPRM,HIF1A,SERPINF1,BTG1,STAB1,SPHK1,IL1B,TNFSF12,RUNX1,THBS1,IL1A	1307	63	13123	1.75311	1	0.663201	83.3692
GO:0031098~stress-activated protein kinase signaling pathway	11	0.652819	0.0919846	WNT5A,SH2D3C,MAP3K6,CCM2,TNIK,PTPLAD1,ARHGEF6,RB1CC1,MAP2K4,MAP4K1,SYK	1307	63	13123	1.75311	1	0.663201	83.3692
GO:0051259~protein oligomerization	24	1.42433	0.0920181	CUTA,SHMT1,IRAK1,PFKL,PCBD1,IDE,ATL3,PFKP,ITPR3,SOD2,MIF,GCH1,RAD51,P2RX4,P2RX7,P2RX1,UQCRH,C1QTNF1,ALOX5AP,TGM2,PEBP1,CAT,PRNP,GCHFR	1307	173	13123	1.39291	1	0.662312	83.3806
GO:0001568~blood vessel development	32	1.89911	0.0928433	NRP1,WASF2,FOXO1,TNFSF12,SRF,PTEN,CXCL12,CITED1,CITED2,ARHGAP22,CD44,HEY1,CXCR4,ANG,TGM2,IL1B,ZC3H12A,TGFA,THBS1,CCM2,EPAS1,IL8,MMP19,MYH9,MMP14,NCL,PNPLA6,HIF1A,EREG,VEGFA,TNFAIP2,ACVR1	1307	244	13123	1.31679	1	0.664723	83.6592
GO:0019318~hexose metabolic process	26	1.54303	0.0939531	LDHB,LDHA,PGD,SLC37A4,PGAM1,HK2,HK1,OGDH,HIBADH,GALK1,AKR1A1,PRKAA1,GAPDH,PFKL,GMDS,PDK3,PFKP,GALT,FBP1,MAN2C1,RENBP,ATF3,PGM1,GAA,UGP2,PYGB	1307	191	13123	1.36678	1	0.668274	84.0269
GO:0010876~lipid localization	22	1.30564	0.0940412	SLC27A1,OSBPL5,ABCA7,MSR1,OSBPL3,GM2A,CHKB,STAT5A,PPARG,OSBPL7,SORL1,APOC1,GLTP,P2RX7,CD36,LRP10,OSBPL1A,PLEKHA9,IL1B,SCARB1,CLN8,PLTP	1307	156	13123	1.41598	1	0.667616	84.0557
GO:0010743~regulation of foam cell differentiation	6	0.356083	0.0962529	MSR1,CD36,PPARG,NFKBIA,NFKB1,NR1H3	1307	25	13123	2.40973	1	0.675542	84.764
GO:0045840~positive regulation of mitosis	6	0.356083	0.0962529	EREG,TGFA,PEBP1,IL1B,IGF1,IL1A	1307	25	13123	2.40973	1	0.675542	84.764
GO:0001910~regulation of leukocyte mediated cytotoxicity	6	0.356083	0.0962529	P2RX7,GIMAP5,STAT5A,PVRL2,IL7R,CD226	1307	25	13123	2.40973	1	0.675542	84.764
GO:0019674~NAD metabolic process	6	0.356083	0.0962529	NAMPT,LDHB,KYNU,IDH3G,KMO,NAPRT1	1307	25	13123	2.40973	1	0.675542	84.764
GO:0009161~ribonucleoside monophosphate metabolic process	6	0.356083	0.0962529	ATIC,CECR1,PAICS,AMPD3,ADA,IMPDH2	1307	25	13123	2.40973	1	0.675542	84.764
GO:0051785~positive regulation of nuclear division	6	0.356083	0.0962529	EREG,TGFA,PEBP1,IL1B,IGF1,IL1A	1307	25	13123	2.40973	1	0.675542	84.764
GO:0030593~neutrophil chemotaxis	5	0.296736	0.0967185	PRKCA,CCL2,IL8,IL1B,SYK	1307	18	13123	2.78904	1	0.676386	84.9093
GO:0032392~DNA geometric change	5	0.296736	0.0967185	TOP3A,TOP1MT,MCM2,MCM6,RAD51	1307	18	13123	2.78904	1	0.676386	84.9093
GO:0046631~alpha-beta T cell activation	5	0.296736	0.0967185	DOCK2,RPL22,BCL3,IL15,SYK	1307	18	13123	2.78904	1	0.676386	84.9093
GO:0045987~positive regulation of smooth muscle contraction	5	0.296736	0.0967185	PTGS2,PTGS1,SPHK1,SRF,ADA	1307	18	13123	2.78904	1	0.676386	84.9093
GO:0032508~DNA duplex unwinding	5	0.296736	0.0967185	TOP3A,TOP1MT,MCM2,MCM6,RAD51	1307	18	13123	2.78904	1	0.676386	84.9093
GO:0043154~negative regulation of caspase activity	5	0.296736	0.0967185	HERPUD1,ADORA2A,CDKN2D,SNCA,DNAJB6	1307	18	13123	2.78904	1	0.676386	84.9093
GO:0045646~regulation of erythrocyte differentiation	5	0.296736	0.0967185	ACVR1B,HIF1A,STAT5A,SPI1,INPP5D	1307	18	13123	2.78904	1	0.676386	84.9093
GO:0042345~regulation of NF-kappaB import into nucleus	5	0.296736	0.0967185	G3BP2,NFKBIA,BCL3,TRIP6,PRDX1	1307	18	13123	2.78904	1	0.676386	84.9093
GO:0006956~complement activation	8	0.474777	0.0972687	C1QA,C1QB,CFH,C1RL,SERPING1,C2,CFD,C1QC	1307	40	13123	2.00811	1	0.677559	85.0793
GO:0006767~water-soluble vitamin metabolic process	8	0.474777	0.0972687	NAMPT,SHMT1,KYNU,AKR1A1,SLC23A2,MCCC1,KMO,NAPRT1	1307	40	13123	2.00811	1	0.677559	85.0793
GO:0051346~negative regulation of hydrolase activity	9	0.534125	0.0995462	HERPUD1,OXA1L,ADORA2A,CDKN2D,SNCA,APOC1,SORT1,GCHFR,DNAJB6	1307	48	13123	1.8826	1	0.685443	85.7638
GO:0051651~maintenance of location in cell	9	0.534125	0.0995462	BBS4,NFKBIE,TLN2,G3BP2,GAA,NFKBIA,BCL3,MXI1,FTH1	1307	48	13123	1.8826	1	0.685443	85.7638
GO:0032582~negative regulation of gene-specific transcription	9	0.534125	0.0995462	MEF2C,BMP2,AES,HES5,HEY1,PPARG,NFKB1,SMARCA2,NCOR2	1307	48	13123	1.8826	1	0.685443	85.7638
GO:0045184~establishment of protein localization	87	5.1632	0.0996873	GNPTG,NPEPL1,TSPO,MSR1,RAB9A,AP1G2,AP1B1,XPO6,CHMP5,XPO5,MLPH,ZMAT3,HPS4,PPARG,VPS37C,CANX,HLA-DMA,RAB3IP,NLRC4,HOMER3,ATG7,AP3B2,RAB21,NSF,KIF13B,SCAMP1,MCM3AP,STX1A,RPGR,LYN,ERP29,MYH9,TIMM44,MAPK1,CD36,ATG4C,TNFSF13B,STXBP5,TOMM20,RAB5A,SORT1,TOM1,RAB13,SNX10,MVP,ARFGAP3,SDAD1,SNX6,RAB40C,NFKBIA,PPT1,CTSA,CDC37,RAB40B,CD74,SLC11A1,NUP214,TRAM2,BCL3,BCL6,DOPEY2,SCG5,STX11,PCSK5,FAM125B,SYS1,LRS…	1307	756	13123	1.15546	1	0.684988	85.8052
GO:0007264~small GTPase mediated signal transduction	38	2.25519	0.099929	RAB9A,GRAP,PTPLAD1,MRAS,WASF2,GNA12,RAB40C,RUNDC3A,IQGAP2,MYO9B,ITSN1,RAB40B,ARHGAP4,ARL5A,RAC2,RASL10A,RALA,CDC42EP4,RAB21,ARL2,RAB8B,G3BP2,IGF1,RAB7L1,ELMO1,MAPK1,RAB32,RND3,SH2D3C,RAB31,RASSF1,ARF4,RAB5A,RAB13,LRRK2,RASD1,RAPGEFL1,BCAR3	1307	300	13123	1.2718	1	0.684922	85.8759

## Sheet: 6h_MF_HMDM
Table S6. GO term enrichment
Term	Count	%	PValue	Genes	List Total	Pop Hits	Pop Total	Fold Enrichment	Bonferroni	Benjamini	FDR
GO:0046870~cadmium ion binding	8	0.569801	2.33131e-06	MT1L,MT1M,MT1A,MT1E,MT1B,MT1JP,MT1H,MT1G,MT1X,MT1F	1033	10	12602	9.75954	0.00270997	0.00270997	0.0037546
GO:0005125~cytokine activity	36	2.5641	6.7852e-06	CXCL1,CCL1,CSF2,IL1F9,NAMPT,CCL3,CXCL5,IL16,IL19,CXCL2,CXCL6,TNFSF12,GREM1,CXCL10,CCL23,CCL20,CCL3L1,CLCF1,CCL3L3,IL1B,EBI3,IL1A,IL6,BMP2,IL8,IL1RN,CCL19,CCL4L1,CCL4L2,IL24,TNFSF9,OSM,GPI,TNFSF10,VEGFA,CMTM8,CMTM7,BMP6	1033	194	12602	2.26381	0.00786689	0.00394121	0.0109273
GO:0016866~intramolecular transferase activity	10	0.712251	9.79674e-05	PGM3,RPUSD4,DKC1,PUS1,RPUSD2,PGAM4,PGM1,PGAM1,LSS,PMM2	1033	25	12602	4.87977	0.107777	0.0372998	0.157664
GO:0008009~chemokine activity	13	0.925926	0.000242534	CCL1,CXCL1,CCL3,IL8,CXCL5,CXCL2,CCL19,CCL4L1,CCL4L2,CXCL6,CXCL10,CCL23,CCL20,CCL3L1,CCL3L3	1033	46	12602	3.44766	0.245985	0.0681523	0.389896
GO:0042379~chemokine receptor binding	13	0.925926	0.000372771	CCL1,CXCL1,CCL3,IL8,CXCL5,CXCL2,CCL19,CCL4L1,CCL4L2,CXCL6,CXCL10,CCL23,CCL20,CCL3L1,CCL3L3	1033	48	12602	3.30401	0.352079	0.0831371	0.598676
GO:0005507~copper ion binding	15	1.06838	0.000650237	STEAP3,MT1L,MT1M,SOD1,METT11D1,MT1X,APP,MT1A,MT1E,MT1B,PRNP,STEAP1,MT1H,MT1JP,MT1G,MT1F,MT3	1033	65	12602	2.81525	0.530986	0.11855	1.04211
GO:0004857~enzyme inhibitor activity	38	2.70655	0.000698873	C13ORF18,CDC42SE1,TIMP2,SERPINH1,TIMP1,TRIB1,APP,GCKR,CDKN2B,SERPINE2,SERPINE1,SERPINA1,SCG5,DNAJC3,GCHFR,CRIM1,ANGPTL4,ARL2,GPS1,ABCE1,PHACTR1,TESC,SOCS3,SOCS1,ANXA1,ANXA5,SERPINB9,RENBP,CDKN1A,SERPINB8,SERPINB7,TNFAIP8,PI3,SERPINB2,TFPI,CABIN1,SERPINB1,TNK2	1033	261	12602	1.77616	0.556817	0.10975	1.11964
GO:0019899~enzyme binding	64	4.5584	0.00106266	WFS1,PGAM1,FOXO3,CRADD,RAB3IP,CTNNB1,ACVR1B,CDKN2B,HMOX1,SLC2A1,SERPINE1,RANBP1,SERPINA1,PAK1,LSM2,CDK5RAP2,CDK5RAP1,SUPT5H,IRAK1,IRS2,ZP3,STRN3,SOCS1,PICK1,PRKCH,POLB,CD40,PPP1CC,PPP1CB,PLAUR,MAPK1,SPAG9,HIF1A,BTG1,F3,BIN1,NXT1,FGD2,AKAP11,ABCA1,GCLM,TRIB1,PFN1,CDC42EP2,ATN1,RASGRP3,BCL2,BCOR,CDC42EP4,FGD3,DNAJA3,GCHFR,RHOBTB3,KAT2A,SPHK2,MAP2K1,SOD1,YWHAH,DUSP2,CABIN1,ATP6V0A1,CYFIP1,GNB2L1,GGA2	1033	521	12602	1.49859	0.709918	0.143327	1.69779
GO:0017076~purine nucleotide binding	190	13.5328	0.00148933	ADCY3,GNA15,GRPEL1,RAB9A,ADCY7,ATP6AP1,IDE,EIF5,RRAD,CLK1,PRKX,BTK,DHX37,MAP3K8,DDX10,RAB20,MTO1,SYK,CIITA,GTPBP3,PDXK,GTPBP6,PIM1,PIM3,PIM2,GEM,STK4,SARS2,RND3,DDX39,MAPK1,RENBP,MAPK6,RIOK3,ATP2C1,NAV2,RIPK2,RAB13,MAPK7,EIF2AK2,SRXN1,TNFRSF6B,RAB7B,GAL3ST4,PFKFB3,MAPKAPK3,UBA7,HSPA1A,ABCA1,HSPA1B,MAPKAPK2,NAGK,RAB40B,EPHB2,TUBB,PTK2,DDX47,GFM1,NAT10,HSPE1,ERO1L,DYRK2,RUNX1,DDX41,CSF1R,RHOBTB3,MA…	1033	1894	12602	1.22381	0.823577	0.175323	2.37183
GO:0004721~phosphoprotein phosphatase activity	26	1.85185	0.00150713	CTDSPL,SSH3,CAMK2G,SSH2,ACP2,PTPLA,PPP3CC,PPAP2B,PTPN6,PTPRF,MAP2K1,PTPN2,DUSP23,PPP1CC,PPP1CB,PTPRO,PTPN12,CDC25B,DUSP5,PPM1F,PPM1G,PPP1CA,DUSP2,DUSP1,PTPN1,DUSP6	1033	162	12602	1.95793	0.827201	0.161015	2.39986
GO:0060589~nucleoside-triphosphatase regulator activity	51	3.63248	0.00218589	GRPEL1,ARHGAP17,ARHGAP15,ITSN1,RAB3IP,ARHGAP4,RCBTB2,ARHGAP22,ARHGAP20,TIAM2,TBC1D14,RANBP1,ERRFI1,EIF2B4,ARHGAP9,ARL2,ARHGEF3,ARHGEF18,ARHGEF6,RAB3IL1,ARHGAP24,ARHGAP23,ARHGAP25,SH2D3C,MAPRE3,RAPGEFL1,SRGAP1,SRGAP2,FGD2,ARFGAP3,SIPA1,CDC42SE1,RASAL1,CDC42EP2,DOCK2,PRR5,RGS12,RASGRP3,TBC1D7,DNAJA3,FGD3,TBC1D2,ARHGDIB,RHOBTB3,GPS1,VAV3,RGS16,ADAP2,RGS2,TNK2,DNAJB6	1033	405	12602	1.53622	0.921696	0.206705	3.46294
GO:0005096~GTPase activator activity	31	2.20798	0.0029393	ARFGAP3,SIPA1,ARHGAP17,ARHGAP15,ARHGAP4,RASAL1,ARHGAP22,PRR5,CDC42EP2,DOCK2,ARHGAP20,RGS12,TIAM2,RASGRP3,TBC1D14,RANBP1,TBC1D7,ERRFI1,ARHGAP9,TBC1D2,ARHGDIB,VAV3,ARHGEF6,ARHGAP24,RGS16,ARHGAP23,ARHGAP25,ADAP2,RGS2,SRGAP1,SRGAP2	1033	216	12602	1.75084	0.967496	0.248385	4.6302
GO:0030695~GTPase regulator activity	49	3.49003	0.00381353	ARHGAP17,ARHGAP15,ITSN1,RAB3IP,ARHGAP4,RCBTB2,ARHGAP22,ARHGAP20,TIAM2,TBC1D14,RANBP1,ERRFI1,EIF2B4,ARHGAP9,ARL2,ARHGEF3,ARHGEF18,ARHGEF6,RAB3IL1,ARHGAP24,ARHGAP23,ARHGAP25,SH2D3C,MAPRE3,RAPGEFL1,SRGAP1,SRGAP2,FGD2,ARFGAP3,SIPA1,CDC42SE1,RASAL1,DOCK2,CDC42EP2,PRR5,RGS12,RASGRP3,TBC1D7,DNAJA3,FGD3,TBC1D2,ARHGDIB,RHOBTB3,GPS1,VAV3,RGS16,ADAP2,RGS2,TNK2	1033	396	12602	1.50952	0.988291	0.28973	5.96807
GO:0032553~ribonucleotide binding	179	12.7493	0.00428071	ADCY3,GNA15,RAB9A,ADCY7,ATP6AP1,IDE,EIF5,RRAD,CLK1,PRKX,BTK,DHX37,MAP3K8,DDX10,RAB20,SYK,CIITA,GTPBP3,PDXK,GTPBP6,PIM1,PIM3,PIM2,GEM,STK4,SARS2,RND3,DDX39,MAPK1,RENBP,MAPK6,RIOK3,ATP2C1,NAV2,RIPK2,RAB13,MAPK7,EIF2AK2,SRXN1,TNFRSF6B,RAB7B,PFKFB3,MAPKAPK3,UBA7,HSPA1A,ABCA1,HSPA1B,MAPKAPK2,NAGK,RAB40B,EPHB2,TUBB,PTK2,DDX47,GFM1,NAT10,HSPE1,DYRK2,DDX41,RUNX1,CSF1R,RHOBTB3,MAP2K1,SPHK2,PIF1,MAP2K3,CNK…	1033	1813	12602	1.20447	0.993218	0.3	6.67578
GO:0032555~purine ribonucleotide binding	179	12.7493	0.00428071	ADCY3,GNA15,RAB9A,ADCY7,ATP6AP1,IDE,EIF5,RRAD,CLK1,PRKX,BTK,DHX37,MAP3K8,DDX10,RAB20,SYK,CIITA,GTPBP3,PDXK,GTPBP6,PIM1,PIM3,PIM2,GEM,STK4,SARS2,RND3,DDX39,MAPK1,RENBP,MAPK6,RIOK3,ATP2C1,NAV2,RIPK2,RAB13,MAPK7,EIF2AK2,SRXN1,TNFRSF6B,RAB7B,PFKFB3,MAPKAPK3,UBA7,HSPA1A,ABCA1,HSPA1B,MAPKAPK2,NAGK,RAB40B,EPHB2,TUBB,PTK2,DDX47,GFM1,NAT10,HSPE1,DYRK2,DDX41,RUNX1,CSF1R,RHOBTB3,MAP2K1,SPHK2,PIF1,MAP2K3,CNK…	1033	1813	12602	1.20447	0.993218	0.3	6.67578
GO:0000166~nucleotide binding	213	15.1709	0.0053956	ADCY3,ADCY7,PGD,CLK1,PRKX,HIBADH,BTK,SFRS7,DHX37,MAP3K8,DDX10,RAB20,SYK,GTPBP3,GTPBP6,PIM1,PIM3,PIM2,GEM,SARS2,RND3,MAPK1,NAV1,MAPK6,ATP2C1,NAV2,MAPK7,RAB13,EIF2AK2,TNFRSF6B,PFKFB3,UBA7,HSPA1A,IGF2BP2,HSPA1B,NAGK,RAB40B,EPHB2,GPD1L,IDH2,NAT10,HNRNPAB,MAP2K1,SPHK2,MAP2K3,CNKSR3,DDX1,ATP13A3,RAB7L1,ATM,GART,ARF4,RIT1,GK,TNK2,PARP1,STEAP3,ATP5D,SLC27A1,NARS,CPEB4,UBE2G2,QARS,CKB,CAMKK2,HSPH1,ARL5A,A…	1033	2213	12602	1.17419	0.998159	0.342843	8.34453
GO:0030228~lipoprotein receptor activity	6	0.42735	0.00546155	CD36,LRP10,LRP12,LRP8,SCARB1,VLDLR	1033	15	12602	4.87977	0.998296	0.328618	8.44236
GO:0003711~transcription elongation regulator activity	7	0.498575	0.00552227	HMGN1,ELP3,ELL,TSFM,SUPT5H,ELL2,THOC1	1033	21	12602	4.06647	0.998413	0.315565	8.53235
GO:0050662~coenzyme binding	26	1.85185	0.00584285	STEAP3,PGD,UGDH,HIBADH,ACOX3,GCH1,GPD1L,IDH2,PNPO,ERO1L,CAT,HADH,NQO1,PDHX,GAPDH,MTO1,DUS3L,HMBS,IDH3B,POR,NDUFV1,TXNRD2,TXNRD1,PARP1,STEAP1,DUS2L	1033	179	12602	1.77198	0.998909	0.315417	9.00607
GO:0016791~phosphatase activity	33	2.35043	0.00598552	PFKFB3,CTDSPL,SSH3,CAMK2G,SSH2,PGAM1,ACP5,ACP2,PGAM4,PTPLA,PPP3CC,INPP5D,PPAP2A,PPAP2B,PTPN6,MAP2K1,PTPRF,PTPN2,DUSP23,PPP1CC,PTPRO,PPP1CB,PTPN12,CDC25B,DUSP5,PPM1F,PPM1G,ACPL2,PPP1CA,DUSP2,DUSP1,PTPN1,DUSP6	1033	246	12602	1.63651	0.999077	0.30774	9.21615
GO:0048037~cofactor binding	33	2.35043	0.00635434	STEAP3,KYNU,PGD,UROS,UGDH,HIBADH,GCH1,ACOX3,NDUFS7,GPD1L,IDH2,PNPO,CAT,ERO1L,HADH,NQO1,GAPDH,PDHX,MTO1,DUS3L,PDXK,HMBS,SDSL,IDH3B,POR,SDS,NDUFV1,TXNRD2,TXNRD1,PARP1,OAT,STEAP1,DUS2L	1033	247	12602	1.62988	0.999401	0.309958	9.75714
GO:0005506~iron ion binding	38	2.70655	0.00668537	STEAP3,TNFRSF6B,PTGS2,CYC1,ACP5,EGLN1,PPAT,NDUFS7,APP,DOCK2,CYP27B1,P4HA2,PLOD2,P4HA1,HMOX1,PGRMC1,PIR,NDUFS8,PPP3CC,CAT,ASPH,CDK5RAP1,ERCC2,ELP3,GALT,CYP26A1,PPP1CC,CYB561,PPP1CB,POR,ISCU,PPP1CA,NDUFV1,SLC25A37,ALOX5,LEPREL1,STEAP1,CYB5D1	1033	297	12602	1.56087	0.999593	0.310511	10.2401
GO:0005149~interleukin-1 receptor binding	6	0.42735	0.007416	IRAK1,IL1F9,IL1RN,IL1B,TLR5,IL1A	1033	16	12602	4.57478	0.999827	0.325535	11.2976
GO:0005543~phospholipid binding	25	1.78063	0.00795428	SNX5,SNX2,ABCA1,RASAL1,NISCH,MAP1LC3A,OSBPL1A,VNN1,SCARB1,PLCB2,HIP1,SH3PXD2B,SNX29,PLA2G15,NCF4,SNX25,ANXA1,HS1BP3,ANXA5,ADAP2,F3,SNX30,PLEKHA2,PTAFR,SNX11	1033	174	12602	1.75279	0.999908	0.332466	12.0691
GO:0051082~unfolded protein binding	18	1.28205	0.00866529	GRPEL1,HSP90AA1,HSPA1A,DNAJB12,HSPA1B,SERPINH1,NAP1L4,SCAP,TRAP1,DNAJB9,HSPA2,C19ORF2,HSPE1,SCG5,DNAJB1,HSPD1,DNAJA4,DNAJA3,DNAJB5	1033	111	12602	1.97828	0.99996	0.34433	13.0786
GO:0016868~intramolecular transferase activity, phosphotransferases	5	0.356125	0.00924233	PGM3,PGAM4,PGM1,PGAM1,PMM2	1033	11	12602	5.54519	0.99998	0.351001	13.8899
GO:0016209~antioxidant activity	10	0.712251	0.0111345	GPX1,PTGS2,GSTK1,TXNRD2,TXNRD1,CAT,SOD1,SRXN1,SOD2,MT3	1033	46	12602	2.65205	0.999998	0.394243	16.5006
GO:0009055~electron carrier activity	28	1.9943	0.0142481	STEAP3,GLRX5,CYC1,UGDH,ACOX3,DOCK2,CYP27B1,AKR1C4,P4HA2,NDUFS8,AKR7A2,SMOX,ASPH,ERO1L,NDUFS3,NQO1,GFOD1,MTO1,GLRX,ABCE1,CYP26A1,IDH3B,POR,DHDH,ALDH2,TXNRD2,TXNRD1,STEAP1	1033	212	12602	1.61124	1	0.46134	20.6358
GO:0051020~GTPase binding	17	1.21083	0.0144681	NXT1,FGD2,SPHK2,MAP2K1,ABCA1,RAB3IP,PFN1,CDC42EP2,RASGRP3,CYFIP1,RANBP1,PAK1,BIN1,CDC42EP4,GGA2,FGD3,RHOBTB3	1033	108	12602	1.92028	1	0.454392	20.9205
GO:0051536~iron-sulfur cluster binding	10	0.712251	0.014642	TNFRSF6B,NDUFS7,ISCU,ELP3,ABCE1,NDUFV1,NDUFS8,CDK5RAP1,PPAT,ERCC2	1033	48	12602	2.54155	1	0.446804	21.1449
GO:0051540~metal cluster binding	10	0.712251	0.014642	TNFRSF6B,NDUFS7,ISCU,ELP3,ABCE1,NDUFV1,NDUFS8,CDK5RAP1,PPAT,ERCC2	1033	48	12602	2.54155	1	0.446804	21.1449
GO:0016651~oxidoreductase activity, acting on NADH or NADPH	13	0.925926	0.0148677	NDUFB10,NDUFB7,CRYZ,CYB561,POR,DHDH,NDUFS7,NDUFV1,NDUFS8,TXNRD2,TXNRD1,NQO1,NDUFS3	1033	73	12602	2.1725	1	0.440772	21.4354
GO:0030554~adenyl nucleotide binding	151	10.755	0.0185836	ADCY3,GRPEL1,ADCY7,ATP6AP1,IDE,CLK1,PRKX,BTK,DHX37,MAP3K8,DDX10,MTO1,SYK,CIITA,PDXK,PIM1,PIM3,PIM2,STK4,SARS2,MAPK1,DDX39,RENBP,MAPK6,RIOK3,ATP2C1,NAV2,RIPK2,MAPK7,EIF2AK2,SRXN1,TNFRSF6B,GAL3ST4,PFKFB3,MAPKAPK3,UBA7,HSPA1A,ABCA1,HSPA1B,MAPKAPK2,NAGK,EPHB2,PTK2,DDX47,NAT10,HSPE1,ERO1L,DYRK2,DDX41,RUNX1,CSF1R,RHOBTB3,MAP2K1,SPHK2,PIF1,MAP2K3,CNKSR3,DDX1,AK2,ATP13A3,PSMB8,ATM,GART,DDX55,MYH11,TNK2,G…	1033	1561	12602	1.18008	1	0.505569	26.0744
GO:0017159~pantetheine hydrolase activity	3	0.213675	0.0190054	VNN1,VNN2,VNN3	1033	3	12602	12.1994	1	0.502409	26.5846
GO:0070053~thrombospondin receptor activity	3	0.213675	0.0190054	CD47,CD36,SDC4	1033	3	12602	12.1994	1	0.502409	26.5846
GO:0004725~protein tyrosine phosphatase activity	16	1.1396	0.020248	PTPN6,MAP2K1,PTPRF,PTPN2,SSH3,SSH2,DUSP23,PTPRO,PTPN12,CDC25B,DUSP5,DUSP2,DUSP1,PTPLA,PTPN1,DUSP6	1033	103	12602	1.89506	1	0.513993	28.068
GO:0008034~lipoprotein binding	8	0.569801	0.0213928	CD36,LRP10,LRP12,SORL1,TLR2,LRP8,SCARB1,VLDLR	1033	35	12602	2.78844	1	0.523046	29.4097
GO:0001883~purine nucleoside binding	152	10.8262	0.0222314	ADCY3,GRPEL1,ADCY7,ATP6AP1,IDE,CLK1,PRKX,BTK,DHX37,MAP3K8,DDX10,MTO1,SYK,CIITA,PDXK,PIM1,PIM3,PIM2,GEM,STK4,SARS2,MAPK1,DDX39,RENBP,MAPK6,RIOK3,ATP2C1,NAV2,RIPK2,MAPK7,EIF2AK2,SRXN1,TNFRSF6B,GAL3ST4,PFKFB3,MAPKAPK3,UBA7,HSPA1A,ABCA1,HSPA1B,MAPKAPK2,NAGK,EPHB2,PTK2,DDX47,NAT10,HSPE1,ERO1L,DYRK2,DDX41,RUNX1,CSF1R,RHOBTB3,MAP2K1,SPHK2,PIF1,MAP2K3,CNKSR3,DDX1,AK2,ATP13A3,PSMB8,ATM,GART,DDX55,MYH11,TN…	1033	1585	12602	1.16991	1	0.526544	30.3777
GO:0008565~protein transporter activity	14	0.997151	0.0222467	XPO1,ARFGAP3,AP1B1,MCL1,TSNAX,IPO11,SNX2,TOMM40,TIMM44,AP2A2,AP4B1,TNPO1,SEC61A1,SEC61G	1033	86	12602	1.98595	1	0.516851	30.3952
GO:0031543~peptidyl-proline dioxygenase activity	4	0.2849	0.0224243	P4HA2,P4HA1,EGLN1,LEPREL1	1033	8	12602	6.09971	1	0.510067	30.5986
GO:0005525~GTP binding	42	2.99145	0.0226058	RAB7B,GNA15,RAB9A,GPR109B,FKBP4,GPR109A,ATL3,EIF5,RRAD,AK3L1,RAB40B,GCH1,ARL5A,TUBB,GFM1,RASL10A,TUBB6,RHOC,SCG5,EHD1,TUBA1B,RAB20,TUBB3,ARL2,GIMAP4,GTPBP3,GIMAP5,GTPBP6,GIMAP6,GIMAP7,GIMAP8,SRPRB,GEM,RAB7L1,RND3,RASL11A,GSPT1,ARF4,RHOT1,RIT1,RAB38,RAB13,RASD1	1033	364	12602	1.40763	1	0.503612	30.8058
GO:0005154~epidermal growth factor receptor binding	5	0.356125	0.0230106	VAV3,EREG,ARF4,TGFA,HBEGF	1033	14	12602	4.35694	1	0.500828	31.266
GO:0030169~low-density lipoprotein binding	6	0.42735	0.0245579	CD36,LRP10,LRP12,SORL1,SCARB1,VLDLR	1033	21	12602	3.48555	1	0.514975	32.9983
GO:0043498~cell surface binding	7	0.498575	0.0276106	CD48,PDGFB,F3,VEGFA,ATP5A1,HSPD1,ANXA5	1033	29	12602	2.94469	1	0.548373	36.2968
GO:0001882~nucleoside binding	152	10.8262	0.0276539	ADCY3,GRPEL1,ADCY7,ATP6AP1,IDE,CLK1,PRKX,BTK,DHX37,MAP3K8,DDX10,MTO1,SYK,CIITA,PDXK,PIM1,PIM3,PIM2,GEM,STK4,SARS2,MAPK1,DDX39,RENBP,MAPK6,RIOK3,ATP2C1,NAV2,RIPK2,MAPK7,EIF2AK2,SRXN1,TNFRSF6B,GAL3ST4,PFKFB3,MAPKAPK3,UBA7,HSPA1A,ABCA1,HSPA1B,MAPKAPK2,NAGK,EPHB2,PTK2,DDX47,NAT10,HSPE1,ERO1L,DYRK2,DDX41,RUNX1,CSF1R,RHOBTB3,MAP2K1,SPHK2,PIF1,MAP2K3,CNKSR3,DDX1,AK2,ATP13A3,PSMB8,ATM,GART,DDX55,MYH11,TN…	1033	1596	12602	1.16185	1	0.540311	36.3424
GO:0005524~ATP binding	140	9.97151	0.0294361	ADCY3,ADCY7,ATP6AP1,IDE,CLK1,PRKX,BTK,DHX37,MAP3K8,DDX10,SYK,CIITA,PDXK,PIM1,PIM3,PIM2,STK4,SARS2,MAPK1,DDX39,RENBP,MAPK6,RIOK3,ATP2C1,NAV2,RIPK2,MAPK7,EIF2AK2,SRXN1,TNFRSF6B,PFKFB3,MAPKAPK3,UBA7,HSPA1A,HSPA1B,MAPKAPK2,ABCA1,NAGK,EPHB2,PTK2,DDX47,NAT10,HSPE1,DYRK2,DDX41,RUNX1,RHOBTB3,CSF1R,MAP2K1,SPHK2,PIF1,MAP2K3,CNKSR3,DDX1,AK2,ATP13A3,PSMB8,ATM,GART,DDX55,MYH11,TNK2,HSPD1,GK,MERTK,ABL2,ATP5D,N…	1033	1462	12602	1.16821	1	0.554604	38.1957
GO:0035091~phosphoinositide binding	15	1.06838	0.0305328	SH3PXD2B,SNX29,SNX5,NCF4,SNX25,SNX2,HS1BP3,NISCH,ADAP2,VNN1,SCARB1,SNX30,PLEKHA2,SNX11,HIP1	1033	99	12602	1.8484	1	0.559708	39.3109
GO:0016861~intramolecular oxidoreductase activity, interconverting aldoses and ketoses	4	0.2849	0.0316215	GPI,TPI1,RENBP,GNPDA1	1033	9	12602	5.42196	1	0.564454	40.3993
GO:0008047~enzyme activator activity	38	2.70655	0.0322725	CXCL1,ARFGAP3,SIPA1,ARHGAP17,ARHGAP15,TIMP2,ITSN1,ARHGAP4,ARHGAP22,RASAL1,APP,PRR5,CDC42EP2,DOCK2,RGS12,ARHGAP20,TIAM2,RASGRP3,TBC1D14,PYCARD,TBC1D7,RANBP1,ERRFI1,EBAG9,TBC1D2,ARHGAP9,ARHGDIB,VAV3,ARHGEF6,RGS16,ARHGAP24,ARHGAP23,ARHGAP25,ADAP2,RGS2,SRGAP1,DNAJB6,SRGAP2	1033	331	12602	1.40054	1	0.563996	41.0414
GO:0016667~oxidoreductase activity, acting on sulfur group of donors	8	0.569801	0.0324704	GLRX5,GSTK1,TXNRD2,TXNRD1,ERO1L,QSOX2,SRXN1,GLRX	1033	38	12602	2.5683	1	0.558469	41.2353
GO:0031267~small GTPase binding	15	1.06838	0.0329355	NXT1,FGD2,SPHK2,MAP2K1,ABCA1,PFN1,CDC42EP2,RASGRP3,CYFIP1,RANBP1,PAK1,CDC42EP4,GGA2,FGD3,RHOBTB3	1033	100	12602	1.82991	1	0.55609	41.6885
GO:0032561~guanyl ribonucleotide binding	42	2.99145	0.033266	RAB7B,GNA15,RAB9A,GPR109B,FKBP4,GPR109A,ATL3,EIF5,RRAD,AK3L1,RAB40B,GCH1,ARL5A,TUBB,GFM1,RASL10A,TUBB6,RHOC,SCG5,EHD1,TUBA1B,RAB20,TUBB3,ARL2,GIMAP4,GTPBP3,GIMAP5,GTPBP6,GIMAP6,GIMAP7,GIMAP8,SRPRB,GEM,RAB7L1,RND3,RASL11A,GSPT1,ARF4,RHOT1,RIT1,RAB38,RAB13,RASD1	1033	374	12602	1.36999	1	0.552322	42.0087
GO:0019001~guanyl nucleotide binding	42	2.99145	0.033266	RAB7B,GNA15,RAB9A,GPR109B,FKBP4,GPR109A,ATL3,EIF5,RRAD,AK3L1,RAB40B,GCH1,ARL5A,TUBB,GFM1,RASL10A,TUBB6,RHOC,SCG5,EHD1,TUBA1B,RAB20,TUBB3,ARL2,GIMAP4,GTPBP3,GIMAP5,GTPBP6,GIMAP6,GIMAP7,GIMAP8,SRPRB,GEM,RAB7L1,RND3,RASL11A,GSPT1,ARF4,RHOT1,RIT1,RAB38,RAB13,RASD1	1033	374	12602	1.36999	1	0.552322	42.0087
GO:0019900~kinase binding	23	1.63818	0.0338501	IRAK1,IRS2,MAP2K1,PICK1,SOCS1,PGAM1,FOXO3,PPP1CC,PPP1CB,TRIB1,CTNNB1,SPAG9,MAPK1,DUSP2,CDKN2B,RASGRP3,ATN1,BTG1,SLC2A1,CDK5RAP2,LSM2,CDK5RAP1,DNAJA3	1033	178	12602	1.57633	1	0.551424	42.5704
GO:0051087~chaperone binding	6	0.42735	0.0354708	GRPEL1,TBCE,HSPE1,HSPD1,SOD1,DNAJB6	1033	23	12602	3.18246	1	0.561447	44.1024
GO:0047115~trans-1,2-dihydrobenzene-1,2-diol dehydrogenase activity	3	0.213675	0.0359542	AKR1C3,AKR1C2,DHDH	1033	4	12602	9.14956	1	0.559412	44.5519
GO:0042288~MHC class I protein binding	5	0.356125	0.0367175	TUBB,ATP5A1,HLA-DMB,HLA-DMA,PSMB8	1033	16	12602	3.81232	1	0.560262	45.2548
GO:0031072~heat shock protein binding	12	0.854701	0.0376364	HIF1A,DNAJB9,FKBP4,DNAJB12,DNAJB1,BCOR,DNAJC3,DNAJA4,AHR,DNAJA3,DNAJB6,DNAJB5	1033	74	12602	1.97828	1	0.562612	46.0898
GO:0016655~oxidoreductase activity, acting on NADH or NADPH, quinone or similar compound as acceptor	8	0.569801	0.0416657	NDUFS7,NDUFB10,NDUFB7,NDUFV1,NDUFS8,NDUFS3,NQO1,CRYZ	1033	40	12602	2.43988	1	0.593712	49.6123
GO:0005095~GTPase inhibitor activity	4	0.2849	0.0424803	ARL2,GPS1,CDC42SE1,TNK2	1033	10	12602	4.87977	1	0.594359	50.2977
GO:0034185~apolipoprotein binding	4	0.2849	0.0424803	LRP8,SCARB1,ABCA1,VLDLR	1033	10	12602	4.87977	1	0.594359	50.2977
GO:0019904~protein domain specific binding	37	2.63533	0.0429021	MTSS1,TLN1,LITAF,ARHGAP17,CRADD,GPX1,PTK2,WBP5,ATN1,BCL2,PYCARD,IL1B,MICAL1,INPP5D,PAG1,SYK,SCAMP1,SH3PXD2B,KHDRBS3,BMP2,IRS2,CARD9,HSP90AA1,BAIAP2L1,STRN3,PICK1,EVL,SHANK3,PTPN12,VASP,PLSCR1,CCDC6,CHMP1B,YWHAH,CALM3,ADAM17,RIPK2,CALM2	1033	328	12602	1.37615	1	0.591578	50.6491
GO:0008320~protein transmembrane transporter activity	5	0.356125	0.044997	MCL1,TOMM40,TIMM44,SEC61A1,SEC61G	1033	17	12602	3.58806	1	0.603068	52.3603
GO:0008135~translation factor activity, nucleic acid binding	14	0.997151	0.0455538	EIF2C2,ELL,EIF5,EIF1B,ELL2,EIF4G1,EIF4B,EIF3B,EIF3G,GSPT1,GFM1,TSFM,EEF2K,EIF2B4	1033	95	12602	1.79781	1	0.601416	52.8058
GO:0032559~adenyl ribonucleotide binding	140	9.97151	0.0461892	ADCY3,ADCY7,ATP6AP1,IDE,CLK1,PRKX,BTK,DHX37,MAP3K8,DDX10,SYK,CIITA,PDXK,PIM1,PIM3,PIM2,STK4,SARS2,MAPK1,DDX39,RENBP,MAPK6,RIOK3,ATP2C1,NAV2,RIPK2,MAPK7,EIF2AK2,SRXN1,TNFRSF6B,PFKFB3,MAPKAPK3,UBA7,HSPA1A,HSPA1B,MAPKAPK2,ABCA1,NAGK,EPHB2,PTK2,DDX47,NAT10,HSPE1,DYRK2,DDX41,RUNX1,RHOBTB3,CSF1R,MAP2K1,SPHK2,PIF1,MAP2K3,CNKSR3,DDX1,AK2,ATP13A3,PSMB8,ATM,GART,DDX55,MYH11,TNK2,HSPD1,GK,MERTK,ABL2,ATP5D,N…	1033	1482	12602	1.15244	1	0.600453	53.3092
GO:0017124~SH3 domain binding	14	0.997151	0.0489152	MTSS1,KHDRBS3,BAIAP2L1,ARHGAP17,EVL,VASP,PTPN12,SHANK3,CCDC6,GPX1,PLSCR1,ADAM17,MICAL1,INPP5D	1033	96	12602	1.77908	1	0.615957	55.4126
GO:0019901~protein kinase binding	19	1.35328	0.0523038	IRAK1,IRS2,MAP2K1,PICK1,SOCS1,PGAM1,FOXO3,PPP1CC,PPP1CB,TRIB1,SPAG9,MAPK1,DUSP2,ATN1,CDKN2B,CDK5RAP2,LSM2,CDK5RAP1,DNAJA3	1033	146	12602	1.5876	1	0.635261	57.9034
GO:0005041~low-density lipoprotein receptor activity	4	0.2849	0.0549445	CD36,LRP10,LRP12,VLDLR	1033	11	12602	4.43615	1	0.647998	59.7533
GO:0001875~lipopolysaccharide receptor activity	3	0.213675	0.0567049	TLR2,SCARB1,PTAFR	1033	5	12602	7.31965	1	0.654138	60.9439
GO:0002020~protease binding	5	0.356125	0.0644032	F3,BCL2,SERPINE1,SERPINA1,CRADD	1033	19	12602	3.21037	1	0.696425	65.7727
GO:0051219~phosphoprotein binding	6	0.42735	0.0650761	MAPK1,CD44,FKBP4,ACP2,SAMSN1,PIN1	1033	27	12602	2.71098	1	0.694789	66.167
GO:0016706~oxidoreductase activity, acting on paired donors, with incorporation or reduction of molecular oxygen, 2-oxoglutarate as one donor, and incorporation of one atom each of oxygen into both donors	6	0.42735	0.0650761	P4HA2,P4HA1,PLOD2,EGLN1,LEPREL1,ASPH	1033	27	12602	2.71098	1	0.694789	66.167
GO:0005516~calmodulin binding	18	1.28205	0.0651688	ADCY3,SLC8A3,CAMTA1,STRN3,CAMK2G,UBR4,RRAD,GEM,RGS16,CAMKK2,KCNN4,RGS2,EEF2K,MYH11,PPP3CC,CNN2,RIT1,MYO5C	1033	140	12602	1.5685	1	0.68987	66.221
GO:0004867~serine-type endopeptidase inhibitor activity	13	0.925926	0.0671479	SERPINH1,SERPINB9,APP,SERPINE2,SERPINB8,SERPINB7,SERPINE1,PI3,SERPINB2,TFPI,SERPINB1,SERPINA1,CRIM1	1033	91	12602	1.74277	1	0.695725	67.3545
GO:0016854~racemase and epimerase activity	4	0.2849	0.0689336	GALM,RENBP,MCEE,DHRS9	1033	12	12602	4.06647	1	0.700279	68.3465
GO:0009982~pseudouridine synthase activity	4	0.2849	0.0689336	RPUSD4,DKC1,PUS1,RPUSD2	1033	12	12602	4.06647	1	0.700279	68.3465
GO:0001530~lipopolysaccharide binding	4	0.2849	0.0689336	TLR2,SCARB1,HSPD1,PTAFR	1033	12	12602	4.06647	1	0.700279	68.3465
GO:0045309~protein phosphorylated amino acid binding	4	0.2849	0.0689336	MAPK1,ACP2,SAMSN1,PIN1	1033	12	12602	4.06647	1	0.700279	68.3465
GO:0046332~SMAD binding	8	0.569801	0.0714877	ACVR1B,BMP2,SMAD6,HIPK2,FKBP1A,TGFBRAP1,TOB1,CTNNB1	1033	45	12602	2.16879	1	0.708691	69.7164
GO:0005275~amine transmembrane transporter activity	11	0.783476	0.0786038	SLC36A1,SLC44A1,SLC1A3,AQP9,PDPN,SLC6A6,SLC7A8,CTNS,SLC7A5,SLC7A6,SLC7A11	1033	74	12602	1.81343	1	0.738711	73.2456
GO:0004030~aldehyde dehydrogenase [NAD(P)+] activity	3	0.213675	0.0805224	ALDH2,ALDH3A2,ALDH3B1	1033	6	12602	6.09971	1	0.742616	74.1289
GO:0008159~positive transcription elongation factor activity	3	0.213675	0.0805224	HMGN1,ELL,SUPT5H	1033	6	12602	6.09971	1	0.742616	74.1289
GO:0004982~N-formyl peptide receptor activity	3	0.213675	0.0805224	FPR1,FPR3,FPR2	1033	6	12602	6.09971	1	0.742616	74.1289
GO:0030674~protein binding, bridging	13	0.925926	0.0815643	STX1A,VAV3,GRAP,SOCS2,FKBP4,ANXA1,CRADD,ARHGAP4,SH2D3C,ADAP2,BCL3,PAG1,TOB1	1033	94	12602	1.68715	1	0.742484	74.597
GO:0001608~nucleotide receptor activity, G-protein coupled	6	0.42735	0.0838094	P2RY8,P2RY11,ADORA3,LPAR5,ADORA2A,GPR109B,GPR109A	1033	29	12602	2.52402	1	0.747625	75.5788
GO:0045028~purinergic nucleotide receptor activity, G-protein coupled	6	0.42735	0.0838094	P2RY8,P2RY11,ADORA3,LPAR5,ADORA2A,GPR109B,GPR109A	1033	29	12602	2.52402	1	0.747625	75.5788
GO:0017017~MAP kinase tyrosine/serine/threonine phosphatase activity	4	0.2849	0.0843484	DUSP5,DUSP2,DUSP1,DUSP6	1033	13	12602	3.75367	1	0.745286	75.8092
GO:0004708~MAP kinase kinase activity	4	0.2849	0.0843484	MAP2K1,MAP2K3,MAPKAPK3,TGFA	1033	13	12602	3.75367	1	0.745286	75.8092
GO:0015035~protein disulfide oxidoreductase activity	4	0.2849	0.0843484	GLRX5,GSTK1,TXNRD1,GLRX	1033	13	12602	3.75367	1	0.745286	75.8092
GO:0033549~MAP kinase phosphatase activity	4	0.2849	0.0843484	DUSP5,DUSP2,DUSP1,DUSP6	1033	13	12602	3.75367	1	0.745286	75.8092
GO:0003924~GTPase activity	24	1.7094	0.0857357	GNA15,GTPBP3,RAB9A,ATL3,EIF5,RRAD,GEM,RAB7L1,RND3,TUBB,RASL11A,GSPT1,GFM1,RASL10A,ARF4,TUBB6,RIT1,RHOC,RAB13,RAB38,EHD1,TUBA1B,RASD1,TUBB3	1033	208	12602	1.40763	1	0.746614	76.3928
GO:0051287~NAD or NADH binding	8	0.569801	0.0862277	GPD1L,NDUFV1,UGDH,IDH2,IDH3B,PARP1,GAPDH,HIBADH	1033	47	12602	2.0765	1	0.744146	76.5965
GO:0015175~neutral amino acid transmembrane transporter activity	5	0.356125	0.0874834	SLC36A1,SLC6A6,SLC7A8,SLC7A5,SLC7A11	1033	21	12602	2.90462	1	0.744924	77.1092
GO:0031418~L-ascorbic acid binding	5	0.356125	0.0874834	P4HA2,P4HA1,PLOD2,EGLN1,LEPREL1	1033	21	12602	2.90462	1	0.744924	77.1092
GO:0019903~protein phosphatase binding	7	0.498575	0.0954811	IRS2,STRN3,CABIN1,AKAP11,SOD1,GNB2L1,CTNNB1	1033	39	12602	2.18964	1	0.772045	80.135

## Sheet: 24h_MF_HMDM
Table S6. GO term enrichment
Term	Count	%	PValue	Genes	List Total	Pop Hits	Pop Total	Fold Enrichment	Bonferroni	Benjamini	FDR
GO:0003735~structural constituent of ribosome	41	2.43323	2.32393e-08	RPL18,RPL17,MRPL41,RPL19,RPL15,RPL27A,RPL35,RPL36,RPS3,RPL32,RPL6,MRPL17,RPLP1,RPL3,FAU,RPL5,RPL12,RPL4,RPL10A,RPS23,RPSA,RPL26,RPL27,RPS9,MRPS6,RPS6,RPS4X,RPS5,MRPL24,MRPL23,RPS18,MRPS18B,RPL18A,MRPS9,RPL13A,RPL22,RPS17,RPS14,RPS15,RPS13,RPS11	1247	160	12602	2.58963	3.11866e-05	3.11866e-05	3.80929e-05
GO:0032395~MHC class II receptor activity	10	0.593472	1.46661e-07	HLA-DQB1,HLA-DRB3,HLA-DRB4,HLA-DPA1,HLA-B,HLA-DPB1,HLA-DOA,HLA-DMA,HLA-DQA1,HLA-DRA	1247	12	12602	8.42155	0.000196799	9.84045e-05	0.0002404
GO:0008034~lipoprotein binding	13	0.771513	7.95358e-05	MSR1,OLR1,SORL1,TLR2,TLR6,LRPAP1,CD36,LRP10,STAB1,CXCL16,SCARB1,LRP8,THBS1	1247	35	12602	3.7536	0.101242	0.0349549	0.130292
GO:0008009~chemokine activity	15	0.890208	9.13017e-05	CCL1,CXCL1,CCL3,CCL2,IL8,CXCL5,CXCL2,CCL4L1,CCL4L2,CXCL6,CXCL12,CCL13,CCL23,PPBP,CCL3L1,CXCL16,CCL3L3	1247	46	12602	3.29539	0.115323	0.0301687	0.149553
GO:0046870~cadmium ion binding	7	0.41543	0.000136547	MT1L,MT1M,MT1A,MT1E,MT1B,MT1JP,MT1H,MT1X,MT1F	1247	10	12602	7.0741	0.167447	0.0359881	0.223587
GO:0042379~chemokine receptor binding	15	0.890208	0.000152037	CCL1,CXCL1,CCL3,CCL2,IL8,CXCL5,CXCL2,CCL4L1,CCL4L2,CXCL6,CXCL12,CCL13,CCL23,PPBP,CCL3L1,CXCL16,CCL3L3	1247	48	12602	3.15808	0.184577	0.0334364	0.248921
GO:0005507~copper ion binding	17	1.0089	0.000456555	MT1L,MT1M,ATOX1,MT1X,P2RX4,P2RX7,APP,MT1A,ANG,MT1E,MT1B,SLC31A2,PRNP,COX17,MT1H,MT1JP,SCO2,ATP7B,MT1F	1247	65	12602	2.64307	0.458189	0.0838253	0.745744
GO:0030169~low-density lipoprotein binding	9	0.534125	0.000559779	MSR1,CD36,LRP10,OLR1,STAB1,CXCL16,SORL1,SCARB1,THBS1	1247	21	12602	4.33108	0.52831	0.0896527	0.913625
GO:0046915~transition metal ion transmembrane transporter activity	10	0.593472	0.000790762	SLC11A1,ATP2C1,SLC30A1,SNCA,SLC30A2,SLC30A3,SLC31A2,SLC40A1,SLC39A3,ATP7B	1247	27	12602	3.74291	0.654106	0.111267	1.28833
GO:0000287~magnesium ion binding	64	3.79822	0.00205323	ADCY3,IMPA2,ADCY7,SNCA,NT5C3L,CLYBL,PTEN,MAP3K6,ACVR1B,MTHFD2,NLRC4,IDH3G,POMT1,MAP3K8,ITPK1,NSF,NT5C,KCNMA1,IRAK1,PFKL,NUDT14,FBP1,PFKP,CHPT1,MARK2,NME4,PPM1F,ATP2C1,SLC41A2,PGM1,TESK2,SRXN1,ACVR1,BRSK1,GPHN,ACSL1,IDH2,DYRK4,ILVBL,ZC3H12A,ENTPD6,PRKAA1,DYRK2,ENTPD4,ACSL4,APEX1,ENOSF1,ERCC2,TESC,MAT2A,PIF1,SPHK1,PRPSAP1,PPA2,ITPA,ICK,P2RX7,RPS6KA3,NME1-NME2,RPS6KA2,ATP2A3,ABL1,ABL2,ATP7B	1247	444	12602	1.4567	0.936598	0.241055	3.31291
GO:0030228~lipoprotein receptor activity	7	0.41543	0.00210558	CD36,LRP10,OLR1,STAB1,CXCL16,LRP8,SCARB1	1247	15	12602	4.71607	0.940908	0.226749	3.39601
GO:0005125~cytokine activity	33	1.95846	0.00261756	CXCL1,CCL1,IL1F9,NAMPT,CCL3,CCL2,CXCL5,IL16,CXCL2,CXCL6,TNFSF12,IL15,CXCL12,MIF,CCL23,CCL3L1,CLCF1,CCL3L3,IL1B,EBI3,IL1A,BMP2,IL8,IL1RN,CCL4L1,CCL4L2,IL24,OSM,CCL13,TNFSF13B,PPBP,GRN,CXCL16,VEGFA,CMTM7	1247	194	12602	1.71904	0.970323	0.254063	4.20525
GO:0046983~protein dimerization activity	74	4.39169	0.00292465	KYNU,PDGFB,MYO7A,HPS4,IDE,PPARG,NFKB1,TPD52,BATF,ASGR1,NLRC4,TP53I3,BOK,ATG7,CREB3L2,CAT,NFIL3,CUTA,IRAK2,IRAK1,STX1A,ADAM10,POLR1D,NCF4,MYH9,TARS,C1QB,ADRB2,CBLN1,RENBP,HIF1A,VEGFA,CLIP1,TFAP2A,NFE2L2,LRRK2,BIN1,ACVR1,GGCT,SNX6,MCL1,ADORA2A,MYO9B,RRAGD,SRF,GCH1,GPD1L,SLC11A1,PPP2CA,ALDH1A3,PVRL2,PYCARD,CD4,RUNX1,HSD17B8,CEBPA,SHMT1,BMP2,CEBPB,ACY1,PTPRE,EPAS1,CEBPD,ARID3A,ZBED1,P2RX4,ATF5,CYBB,P…	1247	537	12602	1.39261	0.980369	0.260925	4.68758
GO:0005149~interleukin-1 receptor binding	7	0.41543	0.00308974	IRAK1,IL1F9,IL1RN,IL1B,TLR5,TRIP6,IL1A	1247	16	12602	4.42131	0.98428	0.256682	4.94592
GO:0008092~cytoskeletal protein binding	69	4.09496	0.00361728	MTSS1,ENAH,MAEA,MLPH,TLN2,MYO7A,WASF2,SNCA,MYBPC3,IQGAP2,SDC4,SDC2,DSTN,PACSIN2,ANG,CXCR4,CDK5RAP2,PARVG,KCNMA1,KIAA1949,STX1A,RET,KIF5B,INPPL1,BAIAP2,ENC1,ACTN1,SPIRE1,MYH9,PKD2L1,VASP,FARP1,EPB41L2,EPB41L3,NDEL1,KIF1B,TNS1,ATG4C,FRMD4A,TRIM32,CLIP1,PRNP,LRPPRC,LCP1,PARVB,BBS4,ADORA2A,CALD1,MYO9B,FXYD5,TPM2,CORO2A,SORBS3,PSTPIP1,CNN2,INF2,PHACTR1,GABARAPL1,MYO1G,EVL,CORO1B,KIAA1279,NME1-NME2,FYN…	1247	498	12602	1.40021	0.992274	0.276903	5.76707
GO:0015082~di-, tri-valent inorganic cation transmembrane transporter activity	11	0.652819	0.00377999	SLC11A1,ATP2C1,ATP2A3,SLC30A1,SNCA,SLC30A2,SLC30A3,SLC31A2,SLC40A1,SLC39A3,ATP7B	1247	39	12602	2.85037	0.993795	0.27214	6.01899
GO:0001530~lipopolysaccharide binding	6	0.356083	0.00409868	P2RX7,LY96,TLR2,SCARB1,HSPD1,CD14	1247	12	12602	5.05293	0.995961	0.276909	6.5106
GO:0015149~hexose transmembrane transporter activity	7	0.41543	0.00602824	SLC2A9,SLC2A6,PPBP,SLC2A3,SLC2A14,SLC37A4,SLC2A1	1247	18	12602	3.93005	0.999701	0.362881	9.43584
GO:0042802~identical protein binding	83	4.92582	0.00700967	CLDN7,LDHB,KYNU,NRP1,PDGFB,E2F7,HPS4,ATL3,IDE,SNCA,NFKB1,TPD52,ASGR1,NLRC4,TP53I3,APP,ATG7,CAT,IRAK2,IRAK1,ADAM10,PFKL,SNRPN,PCBD1,FBP1,KCTD20,MYH9,MCM6,RAD51,TARS,C1QB,ADRB2,CBLN1,RENBP,VEGFA,CLIP1,CTSC,C9ORF30,PRNP,LRRK2,LCP1,ACVR1,BCAT1,GGCT,SNX6,NFKBIA,COL2A1,MYO9B,SRF,CD74,GCH1,GPD1L,SLC11A1,RILPL2,ALDH1A3,GSTK1,PVRL2,PYCARD,CD4,THBS1,RUNX1,CEBPA,SHMT1,BMP2,CEBPB,PTPRE,ARID3A,PRPSAP1,P2RX4,P…	1247	636	12602	1.31885	0.999921	0.391554	10.8905
GO:0015145~monosaccharide transmembrane transporter activity	7	0.41543	0.00808529	SLC2A9,SLC2A6,PPBP,SLC2A3,SLC2A14,SLC37A4,SLC2A1	1247	19	12602	3.72321	0.999981	0.42	12.4596
GO:0019955~cytokine binding	20	1.18694	0.00914875	PLP2,IL2RA,TNFRSF14,IL7R,IL11RA,CD74,IFNAR1,IL18BP,CD36,CXCR5,CXCR4,IL10RB,CSF2RB,CSF3R,THBS1,IL3RA,IFNGR1,GFRA2,EBI3,ACVR1	1247	108	12602	1.87145	0.999996	0.444196	13.9854
GO:0042803~protein homodimerization activity	47	2.78932	0.011637	KYNU,PDGFB,SNX6,GGCT,HPS4,IDE,NFKB1,MYO9B,TPD52,SRF,GCH1,ASGR1,GPD1L,SLC11A1,NLRC4,TP53I3,ALDH1A3,ATG7,PVRL2,PYCARD,CD4,CAT,RUNX1,CEBPA,IRAK2,IRAK1,SHMT1,BMP2,ADAM10,CEBPB,PTPRE,ARID3A,MYH9,C1QB,TARS,P2RX4,RENBP,CBLN1,ADRB2,P2RX7,P2RX1,VEGFA,CLIP1,SUMF2,LRRK2,MGST1,ACVR1	1247	332	12602	1.43065	1	0.510329	17.4585
GO:0005355~glucose transmembrane transporter activity	6	0.356083	0.0120875	SLC2A9,SLC2A6,PPBP,SLC2A3,SLC2A14,SLC2A1	1247	15	12602	4.04234	1	0.508149	18.073
GO:0017124~SH3 domain binding	18	1.06825	0.0124141	MTSS1,ENAH,ADAM10,NCF1,INPPL1,BAIAP2,NCF1C,PTTG2,EVL,ARHGAP17,SIRPA,VASP,PTPN12,SHANK3,ELMO1,PLSCR1,PLSCR3,MICAL1,INPP5D	1247	96	12602	1.89485	1	0.502668	18.5157
GO:0015175~neutral amino acid transmembrane transporter activity	7	0.41543	0.0136266	SLC1A5,SERINC1,SLC7A8,SLC3A2,SLC38A1,SLC7A5,SLC7A11	1247	21	12602	3.36862	1	0.521217	20.1403
GO:0070008~serine-type exopeptidase activity	4	0.237389	0.0153361	F12,PRCP,CTSA,CPVL	1247	6	12602	6.73724	1	0.549642	22.3789
GO:0005041~low-density lipoprotein receptor activity	5	0.296736	0.0177831	CD36,LRP10,OLR1,STAB1,CXCL16	1247	11	12602	4.59357	1	0.590099	25.4811
GO:0019843~rRNA binding	8	0.474777	0.0202961	RPS18,PTRF,ANG,RPS9,MRPS6,RPL5,RPS11,RPS4X	1247	29	12602	2.78782	1	0.625726	28.5454
GO:0016620~oxidoreductase activity, acting on the aldehyde or oxo group of donors, NAD or NADP as acceptor	7	0.41543	0.0213801	ALDH1A1,ALDH7A1,ALDH1A3,ALDH2,OGDH,GAPDH,ALDH3A2	1247	23	12602	3.07569	1	0.632162	29.8304
GO:0022890~inorganic cation transmembrane transporter activity	23	1.36499	0.0240067	ATP5D,SNCA,ATP6V1H,ATP6V1G2,ATP5G2,ATP5G1,SLC11A1,ATP6V0E2,ATP2C1,SLC30A1,ATP2A3,UQCRH,ATP6V0A1,SLC30A2,SLC30A3,SLC22A5,SLC31A2,ATP5I,ATP5H,SLC40A1,SLC39A3,ATP6V0A2,ATP7B	1247	143	12602	1.62542	1	0.662774	32.8546
GO:0008047~enzyme activator activity	45	2.67062	0.0256582	CXCL1,ARFGAP3,GM2A,TBC1D9,PTPLAD1,MYBPC3,APOC1,ARHGAP19,IQGAP2,RUNDC3A,AZIN1,CTSA,MYO9B,ARHGAP17,LTC4S,ARHGAP15,ITSN1,TIMP2,ALDH1A1,ARHGAP4,HMHA1,ARHGAP22,CDC42EP2,DOCK2,APP,RGS12,ARHGAP20,ALOX5AP,GPSM1,PYCARD,CASP1,TBC1D10C,ARHGEF6,NOXA1,RGS18,RGS16,MMP14,ARHGAP25,ARHGAP30,RGS1,RGS2,SRGAP3,LRRK2,DNAJB6,MGST2	1247	331	12602	1.37391	1	0.675429	34.6929
GO:0017159~pantetheine hydrolase activity	3	0.178042	0.0273776	VNN1,VNN2,VNN3	1247	3	12602	10.1059	1	0.687814	36.5565
GO:0030246~carbohydrate binding	47	2.78932	0.028674	GALNT1,CCL2,ENPP2,TLR2,HK2,CXCL6,CLEC10A,CANX,ASGR1,GALK1,C4ORF31,APP,CCL23,CD44,CLEC4E,ANG,GALNTL4,CRISPLD2,NPTX2,CSAD,COMP,FCN1,CLEC2D,CLEC4A,CLEC4D,GPNMB,THBS1,PFKL,OLR1,COL13A1,FBP1,PFKP,SIGLEC10,LGALS9,LRPAP1,CLEC1A,VEGFB,TNFAIP6,STAB1,RPL22,VEGFA,GAA,HBEGF,VCAN,CLEC5A,CD302,CD14	1247	351	12602	1.35321	1	0.693679	37.9286
GO:0060589~nucleoside-triphosphatase regulator activity	53	3.1454	0.0293259	MLPH,MYBPC3,ARHGAP19,IQGAP2,ARHGAP17,ARHGAP15,ITSN1,RAB3IP,ARHGAP4,ARHGAP22,HMHA1,DMXL2,ARHGAP20,ARL2,RPGR,TNIK,ARHGEF6,PSD3,RAB3IL1,FARP1,ARHGAP25,ARHGAP30,SH2D3C,SRGAP3,LRRK2,RAPGEFL1,FGD2,ARFGAP3,TBC1D9,PTPLAD1,RUNDC3A,CDC42SE1,MAP4K1,MYO9B,ALDH1A1,DOCK2,CDC42EP2,PLEKHG2,RGS12,GPSM1,RHOBTB3,SERGEF,TBC1D10C,RGS18,RGS16,DOCK5,RGS1,RGS2,SYTL2,SYTL3,DNAJB6,BCAR3,RANBP10	1247	405	12602	1.32249	1	0.691126	38.6078
GO:0005539~glycosaminoglycan binding	22	1.30564	0.0322192	CCL2,COL13A1,TLR2,CXCL6,LRPAP1,VEGFB,C4ORF31,TNFAIP6,APP,CCL23,CD44,ANG,RPL22,CRISPLD2,STAB1,COMP,VEGFA,HBEGF,VCAN,GPNMB,THBS1,CD14	1247	139	12602	1.59949	1	0.715128	41.5396
GO:0004029~aldehyde dehydrogenase (NAD) activity	4	0.237389	0.0369324	ALDH1A1,ALDH7A1,ALDH2,ALDH3A2	1247	8	12602	5.05293	1	0.754099	46.0355
GO:0051119~sugar transmembrane transporter activity	7	0.41543	0.0378331	SLC2A9,SLC2A6,PPBP,SLC2A3,SLC2A14,SLC37A4,SLC2A1	1247	26	12602	2.72081	1	0.753119	46.8569
GO:0051287~NAD or NADH binding	10	0.593472	0.0383639	GPD1L,LDHB,IDH3G,NDUFV1,NDUFV2,AOX1,IDH2,PARP1,GAPDH,HIBADH	1247	47	12602	2.15018	1	0.748805	47.3354
GO:0004896~cytokine receptor activity	11	0.652819	0.0412501	IL2RA,IL10RB,CSF2RB,CSF3R,IL7R,IL11RA,IL3RA,IFNGR1,EBI3,GFRA2,IFNAR1	1247	55	12602	2.02117	1	0.76532	49.8674
GO:0004364~glutathione transferase activity	6	0.356083	0.0412687	GSTM1,GSTM2,GSTK1,GSTT1,MGST1,MGST2	1247	20	12602	3.03176	1	0.756819	49.8833
GO:0019200~carbohydrate kinase activity	6	0.356083	0.0412687	GALK1,PFKL,HK2,PFKP,HK1,NAGK	1247	20	12602	3.03176	1	0.756819	49.8833
GO:0030695~GTPase regulator activity	51	3.02671	0.0421481	MLPH,ARHGAP19,IQGAP2,ARHGAP17,ARHGAP15,ITSN1,RAB3IP,ARHGAP4,HMHA1,ARHGAP22,DMXL2,ARHGAP20,ARL2,RPGR,TNIK,ARHGEF6,PSD3,RAB3IL1,FARP1,ARHGAP25,ARHGAP30,SH2D3C,SRGAP3,LRRK2,RAPGEFL1,FGD2,ARFGAP3,TBC1D9,PTPLAD1,RUNDC3A,CDC42SE1,MAP4K1,MYO9B,ALDH1A1,DOCK2,CDC42EP2,PLEKHG2,RGS12,GPSM1,RHOBTB3,SERGEF,TBC1D10C,RGS18,RGS16,DOCK5,RGS1,RGS2,SYTL2,SYTL3,BCAR3,RANBP10	1247	396	12602	1.30151	1	0.755734	50.6315
GO:0030247~polysaccharide binding	23	1.36499	0.0438646	CCL2,ENPP2,COL13A1,TLR2,CXCL6,LRPAP1,VEGFB,C4ORF31,TNFAIP6,APP,CCL23,CD44,ANG,RPL22,CRISPLD2,STAB1,COMP,VEGFA,HBEGF,VCAN,GPNMB,THBS1,CD14	1247	152	12602	1.52918	1	0.761467	52.0618
GO:0001871~pattern binding	23	1.36499	0.0438646	CCL2,ENPP2,COL13A1,TLR2,CXCL6,LRPAP1,VEGFB,C4ORF31,TNFAIP6,APP,CCL23,CD44,ANG,RPL22,CRISPLD2,STAB1,COMP,VEGFA,HBEGF,VCAN,GPNMB,THBS1,CD14	1247	152	12602	1.52918	1	0.761467	52.0618
GO:0051082~unfolded protein binding	18	1.06825	0.0450416	HSP90AB1,CLN3,DNAJC10,HSPA1A,HSPA1B,AFG3L2,CANX,CDC37,LRPAP1,HSP90B1,HSPA2,HTRA2,PPIC,DNAJA1,C19ORF2,TOMM20,SCG5,DNAJB1,HSPD1	1247	111	12602	1.63879	1	0.762683	53.02
GO:0048037~cofactor binding	34	2.0178	0.0453511	LDHB,KYNU,D2HGDH,PGD,GCAT,KMO,OGDH,HIBADH,GCH1,GPD1L,TP53I3,IDH3G,CSAD,FASN,IDH2,ILVBL,CAT,ERO1L,NQO1,GAD1,GAPDH,PDHX,DUS3L,SUOX,SHMT1,SHMT2,GMDS,FOXRED2,CYBB,NDUFV1,NDUFV2,AOX1,PARP1,PYGB	1247	247	12602	1.39109	1	0.757209	53.269
GO:0050662~coenzyme binding	26	1.54303	0.0481687	LDHB,D2HGDH,PGD,KMO,OGDH,HIBADH,GCH1,GPD1L,TP53I3,IDH3G,IDH2,ILVBL,ERO1L,CAT,NQO1,PDHX,GAPDH,DUS3L,SUOX,GMDS,FOXRED2,CYBB,NDUFV1,NDUFV2,AOX1,PARP1	1247	179	12602	1.46789	1	0.77059	55.4791
GO:0008146~sulfotransferase activity	10	0.593472	0.0485106	TPST1,TPST2,GAL3ST4,NDST1,NDST2,HS3ST2,SULT1A1,HS3ST1,SULT1A3,CHST13,SULT1A4	1247	49	12602	2.06242	1	0.7656	55.7406
GO:0008429~phosphatidylethanolamine binding	3	0.178042	0.0511827	MAP1LC3A,PEMT,PEBP1	1247	4	12602	7.57939	1	0.776905	57.7345
GO:0004301~epoxide hydrolase activity	3	0.178042	0.0511827	EPHX1,LTA4H,RNPEP	1247	4	12602	7.57939	1	0.776905	57.7345
GO:0050544~arachidonic acid binding	3	0.178042	0.0511827	ALOX5AP,SNCA,PPARG	1247	4	12602	7.57939	1	0.776905	57.7345
GO:0016801~hydrolase activity, acting on ether bonds	4	0.237389	0.0514111	AHCY,EPHX1,LTA4H,RNPEP	1247	9	12602	4.49149	1	0.771367	57.901
GO:0003779~actin binding	42	2.49258	0.0545778	MTSS1,ENAH,MAEA,TLN2,MLPH,CALD1,MYO7A,MYBPC3,WASF2,IQGAP2,MYO9B,FXYD5,TPM2,DSTN,CORO2A,CXCR4,ANG,PSTPIP1,CNN2,PARVG,KCNMA1,INF2,KIAA1949,PHACTR1,INPPL1,ENC1,MYO1G,ACTN1,SPIRE1,EVL,MYH9,VASP,EPB41L2,EPB41L3,CORO1B,TNS1,MYH11,CYFIP1,LRPPRC,PARVB,LCP1,SPTAN1	1247	322	12602	1.31815	1	0.784996	60.1464
GO:0005275~amine transmembrane transporter activity	13	0.771513	0.0582844	SLC44A1,SLC38A2,AQP9,PDPN,SLC3A2,SLC7A8,SLC7A5,SLC7A11,SLC1A5,SERINC1,SLC22A5,SLC38A1,SLC43A2	1247	74	12602	1.77535	1	0.800471	62.6318
GO:0005543~phospholipid binding	25	1.48368	0.0586091	SNX6,NCF1C,APOC1,NCF1B,PICALM,MAP1LC3A,OSBPL1A,PEMT,VNN1,SCARB1,PLCB2,SH3PXD2B,SNX29,SH3PXD2A,PLA2G15,INPPL1,NCF1,SYT11,NCF4,SNX25,ITPR3,MCTP1,PEBP1,SYTL2,SNX10,PLEKHA2	1247	174	12602	1.45199	1	0.795925	62.8424
GO:0042287~MHC protein binding	6	0.356083	0.059525	CD4,HLA-DMB,HLA-DMA,CD74,PSMB8,HLA-DRA	1247	22	12602	2.75614	1	0.794811	63.4306
GO:0017022~myosin binding	6	0.356083	0.059525	STX1A,CXCR4,MLPH,CALD1,TRIM32,MYBPC3	1247	22	12602	2.75614	1	0.794811	63.4306
GO:0035091~phosphoinositide binding	16	0.949555	0.0618376	SH3PXD2B,SNX29,SH3PXD2A,SNX6,NCF1,INPPL1,NCF4,SNX25,NCF1C,NCF1B,ITPR3,PICALM,VNN1,SCARB1,SYTL2,SNX10,PLEKHA2	1247	99	12602	1.63327	1	0.801364	64.877
GO:0005178~integrin binding	11	0.652819	0.0621681	ADAM10,LYN,ITGA5,ICAM2,ACTN1,GPNMB,TIMP2,THBS1,CD226,ADAMDEC1,SYK	1247	59	12602	1.88414	1	0.797113	65.0792
GO:0048487~beta-tubulin binding	5	0.296736	0.0659896	BBS4,GABARAPL1,NDEL1,LRPPRC,RANBP10	1247	16	12602	3.15808	1	0.810948	67.34
GO:0032393~MHC class I receptor activity	5	0.296736	0.0659896	HLA-H,HLA-A,HLA-B,HLA-E,HLA-F	1247	16	12602	3.15808	1	0.810948	67.34
GO:0019904~protein domain specific binding	42	2.49258	0.0685203	HSP90AB1,MTSS1,ENAH,LITAF,MYO7A,NCF1C,PTTG2,ARHGAP17,LPAR1,KCNJ12,PTEN,WBP5,MRPL17,SHISA5,TGM2,PYCARD,IL1B,MICAL1,INPP5D,SLC22A5,ERCC1,PAG1,SYK,SH3PXD2B,SCAMP1,BMP2,ADAM10,INPPL1,NCF1,BAIAP2,EVL,SIRPA,SHANK3,VASP,PTPN12,ELMO1,LIN7A,PLSCR1,YWHAG,NUP62,PLSCR3,CALM3,ID3	1247	328	12602	1.29404	1	0.8175	68.7606
GO:0004177~aminopeptidase activity	7	0.41543	0.0697956	F12,METAP1,NPEPL1,ERAP2,DPP9,DPP7,RNPEP	1247	30	12602	2.35803	1	0.81794	69.4544
GO:0008201~heparin binding	16	0.949555	0.0762217	CCL2,COL13A1,CXCL6,LRPAP1,VEGFB,C4ORF31,APP,CCL23,RPL22,CRISPLD2,ANG,COMP,VEGFA,HBEGF,GPNMB,THBS1	1247	102	12602	1.58523	1	0.840299	72.7354
GO:0016209~antioxidant activity	9	0.534125	0.0793803	PTGS2,PRDX6,GSTK1,PTGS1,PRDX5,CAT,PRDX1,SRXN1,SOD2	1247	46	12602	1.97723	1	0.847603	74.2239
GO:0016814~hydrolase activity, acting on carbon-nitrogen (but not peptide) bonds, in cyclic amidines	7	0.41543	0.0796419	DCTD,MTHFD2,ADARB1,ATIC,AMPD3,ADA,GCH1	1247	31	12602	2.28197	1	0.843745	74.3437
GO:0004185~serine-type carboxypeptidase activity	3	0.178042	0.0797886	PRCP,CTSA,CPVL	1247	5	12602	6.06351	1	0.839481	74.4106
GO:0001875~lipopolysaccharide receptor activity	3	0.178042	0.0797886	LY96,TLR2,SCARB1	1247	5	12602	6.06351	1	0.839481	74.4106
GO:0004857~enzyme inhibitor activity	34	2.0178	0.0836822	C13ORF18,SNCA,APOC1,CDC42SE1,IQGAP2,PRDX5,PTTG2,AZIN1,TIMP2,TIMP1,APP,COL7A1,SPINT2,CDKN2D,SCG5,SERPINA1,GCHFR,CRIM1,ARL2,PHACTR1,TESC,SOCS3,SPINT1,SERPING1,PRPSAP1,RENBP,CDKN1A,YWHAG,SERPINF1,SERPINB6,CPAMD8,SERPINB2,TFPI,PEBP1	1247	261	12602	1.31647	1	0.849172	76.1288
GO:0005161~platelet-derived growth factor receptor binding	4	0.237389	0.0870914	LYN,PDGFB,VEGFA,PTEN	1247	11	12602	3.67486	1	0.856438	77.5437
GO:0048019~receptor antagonist activity	4	0.237389	0.0870914	IL1F9,IL18BP,IL1RN,LRPAP1	1247	11	12602	3.67486	1	0.856438	77.5437
GO:0004622~lysophospholipase activity	4	0.237389	0.0870914	PLA2G15,MGLL,LYPLAL1,PNPLA6	1247	11	12602	3.67486	1	0.856438	77.5437
GO:0030547~receptor inhibitor activity	4	0.237389	0.0870914	IL1F9,IL18BP,IL1RN,LRPAP1	1247	11	12602	3.67486	1	0.856438	77.5437
GO:0016684~oxidoreductase activity, acting on peroxide as acceptor	7	0.41543	0.0902237	PTGS2,PRDX6,GSTK1,PTGS1,PRDX5,CAT,PRDX1	1247	32	12602	2.21066	1	0.862308	78.7738
GO:0004601~peroxidase activity	7	0.41543	0.0902237	PTGS2,PRDX6,GSTK1,PTGS1,PRDX5,CAT,PRDX1	1247	32	12602	2.21066	1	0.862308	78.7738
GO:0019239~deaminase activity	6	0.356083	0.0941864	DCTD,GNPDA1,ADARB1,CECR1,AMPD3,ADA	1247	25	12602	2.4254	1	0.870277	80.2395
GO:0004715~non-membrane spanning protein tyrosine kinase activity	8	0.474777	0.0946972	LYN,FYN,HCK,FES,ABL1,ABL2,SYK,MATK	1247	40	12602	2.02117	1	0.867726	80.4214
GO:0016765~transferase activity, transferring alkyl or aryl (other than methyl) groups	9	0.534125	0.0967052	GSTM1,FNTB,GSTM2,DHDDS,MAT2A,GSTK1,GSTT1,MGST1,MGST2	1247	48	12602	1.89485	1	0.869602	81.1212
