# Supplementary material
Source: publisher figshare collection journal article supplement (https://plos.figshare.com/articles/dataset/_/750110)
Supplement: Supplementary file 1 [file 1 › Table_S7.xlsx]

## Sheet: MDDC
Table S7. Overlap of our findings with MDDCs with Moos et al. 2011 dataset.
	6h						24h
ID	logFC	AveExpr	t	P	adjP	B	logFC	AveExpr	t	P	adjP	B
ENDOGL1	3.55157	9.31824	12.6918	5.79075e-11	5.652e-07	12.045	3.31513	9.31824	11.8468	1.94561e-10	1.35642e-06	11.3085
MT1A	3.56201	12.0293	9.97182	3.68482e-09	2.24783e-05	9.37726	3.79409	12.0293	10.6215	1.27497e-09	7.77765e-06	10.097
MT1E	4.68466	10.6045	13.9578	1.05673e-11	1.71902e-07	13.0136	4.61452	10.6045	13.7488	1.38694e-11	2.40247e-07	12.8619
MT1F	4.09868	11.2432	12.0979	1.34794e-10	9.39748e-07	11.5365	4.02761	11.2432	11.8882	1.83079e-10	1.35642e-06	11.3463
MT1G	4.67407	11.1429	12.8987	4.34552e-11	5.30175e-07	12.2137	4.96477	11.1429	13.7009	1.47687e-11	2.40247e-07	12.8271
MT1H	2.40366	8.25484	5.14873	5.04585e-05	0.120867	1.93503	2.8352	8.25484	6.07311	6.45774e-06	0.02865	3.66071
MT1M	6.04431	9.05133	14.754	3.86454e-12	9.42986e-08	13.5511	5.10771	9.05133	12.4678	7.93432e-11	7.74421e-07	11.856
MT1X	4.43579	11.2375	12.172	1.21098e-10	9.39748e-07	11.602	4.6816	11.2375	12.8465	4.67002e-11	5.69765e-07	12.1699
MT2A	3.28259	12.4496	9.47541	8.56441e-09	4.644e-05	8.78614	3.44049	12.4496	9.93119	3.94392e-09	2.13857e-05	9.32911

## Sheet: HMDM
Table S7. Overlap of our findings with HMDMs with Moos et al. 2011 dataset.
	6h						24h
ID	logFC	AveExpr	t	P	adjP	B	logFC	AveExpr	t	P	adjP	B
ABL2	0.819899	7.97141	7.38993	3.36554e-07	3.15856e-05	6.77599	0.348185	7.97141	3.13827	0.00507409	0.0536451	-2.88892
ACTR5	-0.792304	8.3284	-9.47544	6.27565e-09	1.41394e-06	10.7167	-0.263125	8.3284	-3.1468	0.00497583	0.0528682	-2.87015
ADM	1.39339	11.9851	5.56306	1.76076e-05	0.000714288	2.83748	1.90894	11.9851	7.62138	2.10302e-07	1.40201e-05	7.15252
AKAP11	-0.777196	9.0655	-5.67302	1.3717e-05	0.000581091	3.08579	-0.58097	9.0655	-4.24071	0.000383581	0.00669271	-0.36771
ANKFY1	-0.587283	9.97306	-8.05738	8.84395e-08	1.1269e-05	8.1031	-0.219026	9.97306	-3.00499	0.00687577	0.0684659	-3.17976
ARC	1.56368	7.33331	9.29442	8.67323e-09	1.77845e-06	10.3983	0.385777	7.33331	2.29303	0.0325554	0.21074	-4.63432
ATF3	1.77242	8.92776	13.0701	2.14167e-11	1.80203e-08	16.2204	0.727625	8.92776	5.36561	2.76558e-05	0.000765112	2.25068
ATP6V0A2	0.101697	8.47733	1.00366	0.327264	0.720402	-6.37299	0.701088	8.47733	6.91911	8.95584e-07	4.591e-05	5.69523
AXUD1	2.46484	9.34934	9.81956	3.42976e-09	8.58356e-07	11.3101	1.9448	9.34934	7.74778	1.63173e-07	1.14578e-05	7.40762
BAG3	2.08002	9.08121	10.2743	1.57684e-09	4.99695e-07	12.071	0.794295	9.08121	3.92345	0.000811728	0.01236	-1.10665
BAIAP2	0.30775	8.41774	1.74465	0.0960457	0.409328	-5.4115	-0.589985	8.41774	-3.34466	0.00315269	0.0371922	-2.43033
BANP	0.790387	9.58842	4.25193	0.00037354	0.00793967	-0.185812	0.198149	9.58842	1.06595	0.298859	0.705609	-6.49326
C12orf47	-0.825457	9.49957	-6.63438	1.64202e-06	0.000112548	5.19888	-0.665576	9.49957	-5.34938	2.87064e-05	0.000789256	2.21336
C16orf53	-0.691963	8.43884	-7.97146	1.04692e-07	1.28695e-05	7.93577	-0.266134	8.43884	-3.06588	0.0059868	0.0611998	-3.04745
C1orf115	2.50903	7.75489	22.5412	6.30217e-16	2.56299e-12	25.571	2.96797	7.75489	26.6643	2.25761e-17	1.3772e-13	28.9482
C1orf128	-0.46294	11.4401	-2.69444	0.0137691	0.121357	-3.66376	-1.71678	11.4401	-9.99215	2.54659e-09	3.87162e-07	11.5767
C20orf111	0.733238	10.0112	5.53938	1.85836e-05	0.0007451	2.78384	0.548294	10.0112	4.14218	0.00048415	0.00811071	-0.597708
C6orf128	0.859376	7.25308	7.00212	7.52015e-07	6.16804e-05	5.97625	-0.01352	7.25308	-0.11016	0.913356	0.9823	-7.06265
C9orf61	0.357337	7.2245	2.98579	0.00718159	0.0765065	-3.05042	1.36907	7.2245	11.4394	2.3909e-10	5.60801e-08	13.9275
CCRN4L	0.663393	7.31016	6.28293	3.52101e-06	0.000205415	4.43931	-0.0661388	7.31016	-0.626394	0.537981	0.857907	-6.8666
CDC42EP4	2.13153	9.30977	15.2076	1.27339e-12	1.72622e-09	18.871	2.49169	9.30977	17.7771	6.47144e-14	8.09793e-11	21.8644
CLCF1	1.96884	8.04408	10.8585	6.01325e-10	2.3666e-07	13.011	0.791889	8.04408	4.36743	0.000284353	0.00524056	-0.071482
CLK1	0.617704	10.3873	3.97199	0.000723826	0.0133349	-0.834488	0.0589584	10.3873	0.379117	0.708506	0.925136	-6.99439
COQ10B	0.42687	10.1363	3.34503	0.00314994	0.0409492	-2.26241	0.604586	10.1363	4.73765	0.00011894	0.00255255	0.794142
DCUN1D3	1.89045	8.54504	9.98734	2.56766e-09	7.20155e-07	11.5939	1.55608	8.54504	8.22085	6.43337e-08	5.29446e-06	8.34287
DNAJA1	0.551629	11.636	2.88044	0.00910659	0.0906424	-3.27526	0.852657	11.636	4.45232	0.000232733	0.00444881	0.127088
DNAJA4	1.64415	9.21045	7.1772	5.21805e-07	4.52312e-05	6.33988	0.233143	9.21045	1.01774	0.320683	0.725336	-6.54292
DNAJB1	2.12402	9.40611	11.2494	3.22052e-10	1.5259e-07	13.6172	0.669389	9.40611	3.54527	0.00197546	0.0254372	-1.9767
DNAJB5	0.791415	7.86147	8.00233	9.8523e-08	1.23285e-05	7.99601	0.282248	7.86147	2.85393	0.00966403	0.0886088	-3.50345
DNAJB6	0.859932	11.3211	7.40325	3.27505e-07	3.09746e-05	6.80309	0.52162	11.3211	4.49069	0.000212605	0.00411891	0.21683
DUSP1	1.97117	10.378	6.86787	9.98025e-07	7.76146e-05	5.69457	-0.790774	10.378	-2.75518	0.0120409	0.104513	-3.71121
EGR1	1.82493	8.74896	5.61343	1.57019e-05	0.000649395	2.95138	-0.618379	8.74896	-1.90211	0.0713252	0.348534	-5.33527
EGR2	0.582462	9.18294	2.46863	0.0224768	0.168161	-4.11858	1.03894	9.18294	4.40331	0.000261264	0.00488139	0.0124308
EID3	0.585658	7.50736	4.39579	0.000265937	0.00607312	0.148482	0.0848576	7.50736	0.636919	0.531238	0.854923	-6.85981
EIF5	0.926365	10.0426	7.88552	1.24057e-07	1.48922e-05	7.76737	0.172525	10.0426	1.46859	0.157148	0.529058	-6.00164
ENDOGL1	4.02647	9.55693	8.51112	3.68794e-08	5.67757e-06	8.96951	3.92614	9.55693	8.29904	5.53182e-08	4.65455e-06	8.49448
ERRFI1	1.32386	7.79793	8.64091	2.88589e-08	4.67898e-06	9.21205	0.120028	7.79793	0.783431	0.442347	0.811221	-6.7541
FAM108C1	1.93057	8.09039	11.1757	3.61834e-10	1.63997e-07	13.5043	1.18795	8.09039	6.87685	9.7924e-07	4.92669e-05	5.60541
FBXO30	1.07032	8.26835	9.26551	9.13668e-09	1.83493e-06	10.347	0.182323	8.26835	1.57832	0.129824	0.482425	-5.84542
FKBP4	1.84727	8.55176	11.1425	3.81396e-10	1.67684e-07	13.4532	1.83801	8.55176	11.0867	4.16814e-10	9.08096e-08	13.377
FLJ21865	0.608132	9.09048	3.91859	0.000821085	0.0147481	-0.957739	-0.839076	9.09048	-5.40671	2.5167e-05	0.000709531	2.34509
FLJ39653	-0.896997	8.11201	-8.46376	4.0354e-08	6.00414e-06	8.88041	-0.559673	8.11201	-5.28088	3.36073e-05	0.000896722	2.05563
FOSB	2.3261	7.84977	5.53908	1.85962e-05	0.0007451	2.78317	0.084363	7.84977	0.200892	0.842766	0.964645	-7.04797
FTH1	0.268683	11.8998	1.55523	0.135221	0.48833	-5.69736	1.0475	11.8998	6.06328	5.71669e-06	0.00020727	3.83169
GABARAPL1	1.00917	9.95974	6.56443	1.90885e-06	0.00012657	5.04896	0.931142	9.95974	6.05689	5.79845e-06	0.000209395	3.81742
GADD45B	1.5393	8.72595	10.6894	7.91849e-10	2.9928e-07	12.7431	0.255317	8.72595	1.77301	0.0911128	0.399926	-5.54707
GCLM	1.45486	8.25621	12.1602	7.98177e-11	5.33597e-08	14.9631	0.0134813	8.25621	0.112681	0.911381	0.981859	-7.06235
GEMIN4	-0.727911	8.94006	-4.66618	0.000140668	0.00364184	0.77678	-0.79594	8.94006	-5.10227	5.07929e-05	0.00126019	1.64273
H1F0	-0.0421659	10.5013	-0.203703	0.840597	0.961805	-6.86173	0.892244	10.5013	4.31042	0.000325327	0.00584105	-0.204774
HBEGF	2.51264	9.26266	9.91224	2.92169e-09	7.70726e-07	11.4673	2.14824	9.26266	8.47469	3.95233e-08	3.53263e-06	8.832
HIG2	1.06786	7.29234	12.3799	5.77012e-11	4.02276e-08	15.2743	0.0581005	7.29234	0.673565	0.508124	0.845586	-6.83532
HMOX1	1.72759	11.4405	7.77939	1.5319e-07	1.74626e-05	7.55799	-0.421452	11.4405	-1.89782	0.0719175	0.350027	-5.34248
HSP90AA1	0.723993	12.5146	4.58928	0.000168547	0.00420524	0.59819	0.263499	12.5146	1.67028	0.110088	0.442184	-5.70776
HSPA1A	3.2791	9.69404	10.7137	7.6107e-10	2.9017e-07	12.7817	1.57968	9.69404	5.1612	4.43093e-05	0.00112683	1.77919
HSPA6	2.24314	8.77847	6.34	3.10744e-06	0.000186531	4.56373	0.821319	8.77847	2.32137	0.0306873	0.202246	-4.58039
HSPD1	1.40737	10.4056	9.42714	6.83882e-09	1.51704e-06	10.6322	0.784749	10.4056	5.25658	3.55444e-05	0.000942737	1.99957
HSPE1	0.9841	10.5014	4.06303	0.000583748	0.0112557	-0.623933	-0.320738	10.5014	-1.32422	0.200029	0.5946	-6.19315
HSPH1	1.14609	10.3082	6.2101	4.13206e-06	0.000230724	4.27997	0.7025	10.3082	3.8065	0.00106953	0.0154652	-1.37732
IER5	0.779573	9.4452	6.3645	2.94554e-06	0.000179237	4.61701	0.50278	9.4452	4.10474	0.000528944	0.00870315	-0.685008
IMP3	-0.990861	10.955	-9.23502	9.6533e-09	1.92286e-06	10.2928	-0.249295	10.955	-2.32348	0.0305524	0.201731	-4.57636
KIAA0999	0.58631	9.41673	4.57353	0.000174916	0.00434414	0.561579	1.27934	9.41673	9.97949	2.60248e-09	3.92073e-07	11.555
KIAA1737	-0.742904	8.88253	-9.30384	8.52763e-09	1.77036e-06	10.415	-0.882041	8.88253	-11.0463	4.44571e-10	9.47421e-08	13.313
KIAA1754	0.88846	9.28106	7.88494	1.24198e-07	1.48922e-05	7.76624	0.735497	9.28106	6.52741	2.06767e-06	9.00148e-05	4.85375
KLF9	0.413718	10.4436	2.18081	0.0410248	0.249987	-4.66623	1.15171	10.4436	6.07096	5.62009e-06	0.000204375	3.8488
LOC400506	-0.351507	7.5639	-4.51839	0.000199168	0.00482015	0.433454	-0.623486	7.5639	-8.01449	9.61976e-08	7.41649e-06	7.93871
LOC401317	0.729241	7.21453	6.44017	2.49804e-06	0.000156094	4.7811	0.308253	7.21453	2.72228	0.0129497	0.110157	-3.77971
MAFG	1.17355	9.02804	4.50663	0.000204764	0.00492234	0.406122	0.122685	9.02804	0.47113	0.642531	0.90187	-6.95401
MAP3K8	1.32915	9.45314	10.2281	1.70464e-09	5.26518e-07	11.9948	1.93	9.45314	14.8517	1.98929e-12	1.22887e-09	18.6089
MCL1	1.78714	8.23689	11.9977	1.01776e-10	6.34351e-08	14.7295	0.713997	8.23689	4.79328	0.000104399	0.00229397	0.923983
METRNL	1.80087	8.70948	8.98956	1.50947e-08	2.79034e-06	9.85214	0.188999	8.70948	0.943442	0.35646	0.753138	-6.61536
MGC4677	1.98287	9.78743	9.28957	8.74929e-09	1.77909e-06	10.3897	-0.157726	9.78743	-0.73893	0.46834	0.825904	-6.7884
MIDN	1.28213	9.7426	9.80234	3.53383e-09	8.79886e-07	11.2808	0.850223	9.7426	6.50027	2.19274e-06	9.46155e-05	4.7947
MLLT10	-0.688255	8.56787	-9.62348	4.83082e-09	1.15932e-06	10.9739	-0.194614	8.56787	-2.72117	0.0129814	0.110369	-3.78201
MRPL18	0.991777	9.54368	7.88818	1.23406e-07	1.48702e-05	7.7726	-0.206605	9.54368	-1.64325	0.115607	0.45338	-5.74885
MT1A	3.17246	12.9725	4.51213	0.000202126	0.00486878	0.418912	2.39951	12.9725	3.41277	0.00269124	0.0327689	-2.27708
MT1B	3.25927	8.31689	6.97242	8.00454e-07	6.45682e-05	5.91413	6.31953	8.31689	13.5191	1.14901e-11	4.67283e-09	16.9093
MT1E	3.97487	8.06629	23.1122	3.84762e-16	1.70701e-12	25.9761	4.29537	8.06629	24.9758	8.28948e-17	4.04543e-13	27.8495
MT1F	4.64742	12.1749	7.08191	6.36317e-07	5.34484e-05	6.14249	2.73638	12.1749	4.16979	0.000453568	0.00768311	-0.533296
MT1G	4.82366	12.1916	5.02524	6.07461e-05	0.00190523	1.60789	2.70429	12.1916	2.8173	0.010488	0.0942434	-3.58089
MT1H	2.35719	7.95447	12.5694	4.37657e-11	3.18784e-08	15.5389	4.6014	7.95447	24.5364	1.17867e-16	4.79344e-13	27.5476
MT1JP	4.49675	8.3198	23.7628	2.22284e-16	1.28178e-12	26.4216	5.72226	8.3198	30.2389	1.82815e-18	1.78434e-14	30.9907
MT1L	2.5741	7.56827	25.3575	6.13403e-17	4.98921e-13	27.4457	2.22206	7.56827	21.8895	1.12284e-15	3.65312e-12	25.5728
MT1M	6.67959	9.81939	7.89483	1.21789e-07	1.47231e-05	7.78568	5.74007	9.81939	6.78438	1.19153e-06	5.78021e-05	5.40805
MT1X	4.01827	12.3781	5.81713	9.9087e-06	0.000452776	3.40934	3.15504	12.3781	4.56744	0.000177437	0.00355613	0.396362
MT2A	2.74185	13.0169	4.28251	0.000347504	0.00748076	-0.114785	2.63631	13.0169	4.11766	0.000513047	0.00851263	-0.654909
MXD1	1.26154	10.4247	8.85199	1.94571e-08	3.40339e-06	9.60156	1.86455	10.4247	13.0832	2.10258e-11	7.71505e-09	16.3195
NKTR	-0.636647	10.6171	-3.61398	0.00168181	0.0256247	-1.65594	-0.389608	10.6171	-2.21164	0.0385175	0.236355	-4.78704
NR4A2	0.800259	7.40991	5.36195	2.78895e-05	0.00103267	2.3804	0.105456	7.40991	0.706582	0.487794	0.836158	-6.81214
NUP62	-0.221577	12.3892	-2.24145	0.0362268	0.230591	-4.55417	0.754621	12.3892	7.63367	2.0516e-07	1.36966e-05	7.17741
OSGIN1	0.709258	7.73316	6.9736	7.98461e-07	6.4514e-05	5.91661	-0.019459	7.73316	-0.191326	0.850156	0.966756	-7.04992
P4HA2	2.40463	8.34141	16.2098	3.79565e-13	6.77157e-10	19.9847	0.898851	8.34141	6.05924	5.76826e-06	0.000208554	3.82267
PH-4	-0.0984335	8.80405	-0.628273	0.536774	0.852408	-6.68034	0.791892	8.80405	5.05442	5.67618e-05	0.0013809	1.53175
PIM1	1.94623	9.82179	4.88301	8.46318e-05	0.00244349	1.27936	0.559465	9.82179	1.40367	0.175408	0.557577	-6.08977
PPP1R13B	0.711248	7.8233	3.35086	0.00310768	0.0405588	-2.24941	1.96524	7.8233	9.25871	9.24926e-09	1.09294e-06	10.2878
PPP1R15A	0.994625	12.1291	4.31649	0.000320703	0.0070373	-0.035845	0.680972	12.1291	2.95529	0.0076944	0.0746971	-3.28699
RASD1	2.62653	7.52493	11.6929	1.61623e-10	8.81048e-08	14.2839	1.22002	7.52493	5.43133	2.37865e-05	0.000677659	2.40158
RERE	-0.634383	8.73218	-4.74721	0.000116304	0.0031341	0.964787	-0.522893	8.73218	-3.91291	0.000832166	0.012624	-1.13108
RGS16	2.56705	7.69791	16.19	3.88517e-13	6.77157e-10	19.9634	1.18429	7.69791	7.46911	2.86312e-07	1.80059e-05	6.84226
RGS2	2.21266	9.22278	7.71857	1.72995e-07	1.9144e-05	7.43726	1.04201	9.22278	3.6349	0.00160125	0.0214388	-1.77202
RND3	0.680804	7.6104	3.38878	0.00284566	0.0380998	-2.16457	0.939758	7.6104	4.67776	0.000136894	0.0028623	0.65424
RPUSD2	-0.776995	9.10191	-8.67783	2.69247e-08	4.42418e-06	9.28063	-0.444328	9.10191	-4.96246	7.03096e-05	0.00164489	1.31809
RRS1	-0.709586	8.07882	-6.82476	1.09353e-06	8.36464e-05	5.6036	-0.379751	8.07882	-3.65243	0.00153673	0.0207393	-1.73187
RSRC2	0.161422	8.80343	1.39321	0.178505	0.557696	-5.9212	0.681075	8.80343	5.87828	8.63748e-06	0.000294362	3.41728
RUNDC2C	-0.37389	8.7923	-1.33991	0.194963	0.581809	-5.99042	-1.07937	8.7923	-3.86815	0.000924862	0.0137364	-1.23479
SERPINH1	0.935614	7.92126	8.28052	5.73287e-08	7.99359e-06	8.53277	-0.0880781	7.92126	-0.779523	0.444594	0.812166	-6.75719
SERTAD1	1.24256	10.5085	7.26125	4.38471e-07	3.95447e-05	6.51295	0.994128	10.5085	5.80945	1.00813e-05	0.0003322	3.26216
SESN1	-0.599488	8.90223	-3.24266	0.0039915	0.0491406	-2.48992	-0.618129	8.90223	-3.34349	0.0031612	0.037255	-2.43294
SETDB2	-1.33185	9.517	-11.4073	2.51377e-10	1.26471e-07	13.8571	-1.96277	9.517	-16.8111	1.8931e-13	2.01348e-10	20.8546
SLC30A1	1.20084	8.11289	8.83372	2.01279e-08	3.49566e-06	9.56809	1.49517	8.11289	10.9989	4.79632e-10	1.0003e-07	13.2377
SLC7A11	1.29878	9.27353	7.44925	2.98138e-07	2.87777e-05	6.89648	2.18187	9.27353	12.5143	4.74161e-11	1.45534e-08	15.5225
SOCS3	0.912983	7.35156	5.69586	1.3026e-05	0.000559097	3.1372	0.272084	7.35156	1.69746	0.104767	0.431109	-5.66595
SRXN1	0.895453	9.95236	3.99052	0.000692836	0.0128781	-0.79168	1.04947	9.95236	4.67686	0.000137184	0.00286594	0.652136
STK40	-0.567815	11.2176	-4.22665	0.000396539	0.00834494	-0.244526	-0.683334	11.2176	-5.08653	5.26827e-05	0.00130112	1.60623
TANK	0.807245	10.0597	4.99222	6.55991e-05	0.00201979	1.53171	0.867556	10.0597	5.3652	2.76818e-05	0.000765398	2.24974
THADA	-0.687501	8.55587	-6.20838	4.14775e-06	0.000231335	4.2762	-0.611682	8.55587	-5.52371	1.92595e-05	0.000568261	2.61306
THAP11	-0.725814	10.2122	-5.51016	1.98638e-05	0.00078445	2.71762	-0.391871	10.2122	-2.97497	0.00735964	0.0720725	-3.24461
TMEM66	0.574177	12.524	4.55648	0.000182077	0.00448322	0.521974	0.836488	12.524	6.63809	1.629e-06	7.51404e-05	5.09353
TNFSF9	0.655429	7.44864	8.12589	7.73636e-08	1.01492e-05	8.23576	-0.11956	7.44864	-1.48228	0.1535	0.52323	-5.98263
TPD52	0.0174461	7.33183	0.211749	0.834397	0.960451	-6.86	0.737748	7.33183	8.95432	1.61053e-08	1.70123e-06	9.73234
TRIB1	1.07904	10.9081	6.19202	4.29999e-06	0.000237294	4.24031	0.0167435	10.9081	0.0960814	0.924391	0.983628	-7.06416
TXNRD1	1.42709	10.1273	3.4706	0.00235201	0.0328232	-1.98069	0.499579	10.1273	1.21495	0.238218	0.643266	-6.32699
WBP5	2.11004	10.5516	9.96047	2.68893e-09	7.2903e-07	11.5487	1.39558	10.5516	6.58782	1.81498e-06	8.19375e-05	4.98482
ZBTB46	0.420069	9.23297	2.75535	0.0120365	0.110498	-3.53782	0.698219	9.23297	4.57981	0.000172346	0.00347268	0.425285
ZFAND2A	1.76313	9.33534	6.50734	2.15942e-06	0.000139582	4.92614	0.338396	9.33534	1.24895	0.225782	0.62906	-6.2864
ZFAND5	-0.0927108	12.52	-0.948813	0.353786	0.742096	-6.42607	0.590532	12.52	6.04357	5.97257e-06	0.000214596	3.78771
ZFYVE26	-0.815806	10.5845	-8.71707	2.50159e-08	4.18091e-06	9.35331	-0.801501	10.5845	-8.56422	3.33499e-08	3.08168e-06	9.00244

## Sheet: Jurkat
Table S7. Overlap of our findings with Jurkat cells with Moos et al. 2011 dataset.
	6h						24h
ID	logFC	AveExpr	t	P	adjP	B	logFC	AveExpr	t	P	adjP	B
ABHD3	0.951984	9.16038	9.86137	1.51331e-09	2.23119e-07	12.0367	-0.0440565	9.16038	-0.456371	0.652585	0.917263	-6.43421
ACTR5	-0.851016	8.71256	-11.7375	5.86447e-11	1.55542e-08	15.2641	-0.0494725	8.71256	-0.682341	0.502126	0.855881	-6.30449
AHSA1	1.1732	11.6067	8.34117	2.86986e-08	2.55575e-06	9.09358	0.259031	11.6067	1.84164	0.0790134	0.441242	-4.92755
AHSA2	1.08252	8.80999	11.0079	1.98177e-10	4.29841e-08	14.0589	0.216557	8.80999	2.20213	0.0384059	0.312902	-4.30091
ANKFY1	-0.691534	9.76062	-6.99352	5.02197e-07	2.82028e-05	6.22171	-0.0960535	9.76062	-0.971395	0.341883	0.766748	-6.06748
ARL5B	0.935698	8.18041	9.05005	7.01469e-09	7.81578e-07	10.5046	0.0143067	8.18041	0.138374	0.8912	0.977561	-6.53054
ASTE1	-0.71564	8.34428	-10.33	6.47271e-10	1.11226e-07	12.8829	-0.172957	8.34428	-2.49656	0.020497	0.225241	-3.73757
ATF3	4.06236	8.2483	13.4798	3.96393e-12	1.68215e-09	17.9102	1.80242	8.2483	5.98083	5.03927e-06	0.0013012	4.19581
BAG3	3.38233	10.3223	14.3347	1.16655e-12	6.46934e-10	19.1002	1.73924	10.3223	7.37115	2.19765e-07	0.000126924	7.21531
BANP	0.916826	9.54711	7.62877	1.26423e-07	9.1403e-06	7.60621	0.436987	9.54711	3.6361	0.00145389	0.0516236	-1.26637
C16orf53	-0.724987	9.87279	-5.40445	1.97224e-05	0.000639954	2.54416	-0.375835	9.87279	-2.80168	0.0103791	0.1559	-3.11405
C20orf111	1.17054	9.99713	12.9201	9.13419e-12	3.32662e-09	17.0937	0.573033	9.99713	6.32495	2.26963e-06	0.000738415	4.96694
CACYBP	0.872954	11.9292	3.50685	0.00198507	0.0289181	-2.00859	-0.529912	11.9292	-2.12878	0.0446808	0.336915	-4.43446
CCDC117	1.28357	11.2136	14.5205	9.0137e-13	5.36447e-10	19.3501	0.0266622	11.2136	0.301618	0.765768	0.949285	-6.49386
CDKN1B	0.592306	9.74729	6.43355	1.76967e-06	8.10924e-05	4.95784	0.13942	9.74729	1.51437	0.14413	0.562426	-5.42447
CENPF	0.928378	10.4192	11.1653	1.51667e-10	3.45872e-08	14.3241	0.425118	10.4192	5.11275	3.9797e-05	0.00536934	2.19561
CHORDC1	1.60673	9.01156	11.6453	6.81879e-11	1.7242e-08	15.1152	0.147778	9.01156	1.07107	0.295716	0.732045	-5.96805
CLIP4	0.800918	8.18487	10.9194	2.30606e-10	4.9135e-08	13.9086	0.20861	8.18487	2.84411	0.0094228	0.147968	-3.02462
CLK1	1.9675	10.4978	12.7554	1.17401e-11	4.09242e-09	16.8476	0.806834	10.4978	5.23072	2.99363e-05	0.00437411	2.47116
CPEB3	1.18237	7.99608	12.0569	3.50155e-11	1.02941e-08	15.773	0.544852	7.99608	5.55597	1.37345e-05	0.00260805	3.22544
DCUN1D3	0.761736	8.4743	8.98962	7.88974e-09	8.69154e-07	10.3869	0.0768819	8.4743	0.907321	0.374042	0.789226	-6.12669
DDIT3	2.91459	8.8554	12.7139	1.25104e-11	4.33002e-09	16.7853	0.919973	8.8554	4.01307	0.000581689	0.0298503	-0.390957
DDX23	-0.606868	10.5163	-7.48026	1.73696e-07	1.19558e-05	7.28739	-0.078443	10.5163	-0.966889	0.344081	0.768481	-6.07176
DEDD2	2.40632	10.7837	11.8997	4.50758e-11	1.26425e-08	15.5239	1.01696	10.7837	5.02904	4.87349e-05	0.00606744	1.99958
DNAJA1	1.13657	13.4196	11.1021	1.68795e-10	3.74433e-08	14.218	0.167801	13.4196	1.63909	0.115378	0.517574	-5.24393
DNAJB1	3.44393	11.0311	15.9332	1.37943e-13	1.20212e-10	21.1568	0.985826	11.0311	4.56088	0.000152381	0.0128437	0.897964
DNAJB6	1.74741	10.87	10.832	2.68081e-10	5.47401e-08	13.7591	0.571986	10.87	3.54568	0.00180814	0.0582551	-1.47373
DUSP1	2.50253	8.41353	11.9632	4.06941e-11	1.16138e-08	15.6248	0.639207	8.41353	3.05569	0.00578232	0.113465	-2.57008
EGR1	2.34675	7.90263	7.08461	4.10727e-07	2.41789e-05	6.42353	1.58735	7.90263	4.79204	8.66853e-05	0.00900088	1.44272
EIF5	0.921644	11.1788	6.88155	6.43972e-07	3.46114e-05	5.97213	-0.110065	11.1788	-0.82181	0.419979	0.815399	-6.19985
ENDOGL1	3.96603	8.90382	38.996	7.60388e-22	5.30121e-18	37.3315	4.14022	8.90382	40.7086	2.983e-22	1.8197e-18	32.6856
FAM53C	0.966589	10.9272	7.09351	4.02762e-07	2.37961e-05	6.44318	0.242312	10.9272	1.77826	0.0891494	0.464914	-5.02952
FASTKD2	-0.603087	8.65643	-10.2414	7.58478e-10	1.24212e-07	12.7251	-0.106063	8.65643	-1.80113	0.0853697	0.456807	-4.99303
FEM1A	-1.13329	10.5883	-14.362	1.12307e-12	6.2998e-10	19.1371	0.0821024	10.5883	1.04047	0.309391	0.742947	-5.99951
FKBP4	1.13898	10.6819	9.44047	3.31917e-09	4.21596e-07	11.2527	0.0794623	10.6819	0.658628	0.516951	0.862091	-6.32044
FLJ21865	1.91918	8.30248	13.5693	3.47788e-12	1.53914e-09	18.0378	0.391278	8.30248	2.76647	0.0112422	0.163278	-3.18782
FOS	2.12462	7.39155	7.56264	1.4558e-07	1.03135e-05	7.46461	1.41374	7.39155	5.03225	4.83572e-05	0.00606744	2.0071
FOSB	3.41363	8.06335	10.2146	7.95915e-10	1.29141e-07	12.6771	1.68083	8.06335	5.02954	4.86758e-05	0.00606744	2.00075
FTH1	0.844531	8.72603	6.73104	9.01838e-07	4.57976e-05	5.63415	0.581343	8.72603	4.63339	0.000127643	0.0116001	1.06894
GABARAPL1	1.53099	8.22835	15.7698	1.70146e-13	1.41172e-10	20.956	0.439401	8.22835	4.526	0.000165945	0.0136412	0.815697
GADD45B	0.509144	7.42927	3.06607	0.00564401	0.0658473	-3.01365	0.672115	7.42927	4.04748	0.000534819	0.0286501	-0.310385
GCLM	0.644735	8.27668	7.55099	1.49253e-07	1.05258e-05	7.4396	-0.0645477	8.27668	-0.755967	0.457666	0.834808	-6.25155
GEMIN4	-1.25021	11.5475	-11.7269	5.9663e-11	1.56888e-08	15.2471	0.0532959	11.5475	0.499916	0.622085	0.906346	-6.41312
HBEGF	-0.445941	9.05133	-4.30494	0.000284977	0.00593573	-0.10885	0.882188	9.05133	8.5163	2.01394e-08	1.89008e-05	9.49482
HSP90AA1	0.771498	13.2421	6.77662	8.14141e-07	4.21333e-05	5.73681	-0.10863	13.2421	-0.954175	0.350335	0.772608	-6.08375
HSPA1A	1.33752	7.13669	10.4443	5.28253e-10	9.47787e-08	13.0851	0.663926	7.13669	5.1844	3.3473e-05	0.00476253	2.36308
HSPA4	0.980341	10.9931	10.2813	7.061e-10	1.17608e-07	12.7963	-0.0297011	10.9931	-0.311491	0.758352	0.948039	-6.49077
HSPA4L	1.92621	9.39789	13.9707	1.94949e-12	9.80815e-10	18.6016	-0.0846474	9.39789	-0.613941	0.545534	0.875414	-6.34902
HSPA6	2.66035	7.49475	19.528	2.06536e-15	5.02639e-12	25.109	2.0083	7.49475	14.7417	6.65305e-13	1.9099e-09	18.8356
HSPD1	0.58867	13.3065	5.29349	2.57396e-05	0.000798417	2.27837	-0.0618216	13.3065	-0.555917	0.583863	0.892016	-6.38323
HSPE1	0.970989	9.7301	5.325	2.38624e-05	0.000750826	2.35394	-0.13947	9.7301	-0.764868	0.452456	0.832712	-6.2448
HSPH1	1.72954	12.5203	13.1906	6.08073e-12	2.35517e-09	17.4921	0.216286	12.5203	1.64953	0.113207	0.514505	-5.22831
IER5	1.63869	8.5316	10.5691	4.23816e-10	7.89429e-08	13.3041	0.374781	8.5316	2.41724	0.0243488	0.248384	-3.89337
IMP3	-1.19854	12.3763	-18.422	6.96028e-15	1.21313e-11	23.981	-0.206734	12.3763	-3.17756	0.00434617	0.0959945	-2.30248
ISCA1	0.692462	8.59914	11.1712	1.50149e-10	3.44017e-08	14.3341	0.124863	8.59914	2.01437	0.0563225	0.378343	-4.6368
JMJD1C	0.720764	8.74725	5.76868	8.29457e-06	0.00030853	3.41001	0.406951	8.74725	3.25705	0.00360247	0.0861248	-2.12592
KIAA0895	1.02834	8.15019	10.6315	3.79933e-10	7.20838e-08	13.4128	0.249575	8.15019	2.58022	0.0170549	0.204122	-3.57028
KIAA1666	-0.0616887	7.42681	-0.289068	0.775229	0.954409	-7.02861	0.869712	7.42681	4.07539	0.000499568	0.0274713	-0.24496
KIAA1737	-0.620862	9.08533	-5.79047	7.87895e-06	0.000296232	3.46146	-0.443764	9.08533	-4.13877	0.000427888	0.024922	-0.0962457
KIAA1754	0.882933	9.01311	11.5481	8.00125e-11	1.9666e-08	14.9571	0.0822759	9.01311	1.07611	0.293508	0.730645	-5.9628
KLF6	0.816907	9.10389	4.57687	0.000146542	0.0033974	0.548695	0.340064	9.10389	1.90527	0.0698619	0.419	-4.82258
KLHL25	0.728214	7.4126	9.08093	6.60688e-09	7.51583e-07	10.5645	0.271809	7.4126	3.38949	0.0026293	0.071748	-1.82866
LDLR	1.54022	11.0668	9.42572	3.41317e-09	4.30412e-07	11.2248	0.461427	11.0668	2.8238	0.00986962	0.151655	-3.06751
LEO1	-0.855236	9.90823	-8.0503	5.21474e-08	4.32805e-06	8.49472	-0.24335	9.90823	-2.29065	0.0319051	0.286641	-4.13598
LOC201164	-0.848181	8.23539	-9.77138	1.78675e-09	2.54962e-07	11.871	-0.182296	8.23539	-2.10012	0.0473736	0.346459	-4.48584
LRFN3	-0.635358	9.24548	-6.38681	1.96939e-06	8.83366e-05	4.8506	-0.302127	9.24548	-3.03707	0.00603858	0.116618	-2.61061
LTV1	-0.906242	10.5999	-7.47864	1.74301e-07	1.19806e-05	7.28389	-0.370513	10.5999	-3.0576	0.00575657	0.113232	-2.56591
MAFG	0.666674	8.15744	4.12571	0.00044177	0.0084513	-0.540703	0.420572	8.15744	2.60271	0.0162266	0.199118	-3.52482
MAP1LC3B	0.798686	9.38789	8.23644	3.55374e-08	3.07499e-06	8.8793	0.290448	9.38789	2.99524	0.00665471	0.122923	-2.70131
MAP6D1	-0.896464	9.60481	-13.6189	3.23527e-12	1.46192e-09	18.1084	-0.188224	9.60481	-2.85945	0.00909815	0.145325	-2.99213
MCL1	1.54557	7.973	14.7019	7.02424e-13	4.51049e-10	19.5914	-0.0409549	7.973	-0.389575	0.700586	0.931709	-6.4629
MGC4677	0.718498	11.2308	5.45521	1.7467e-05	0.000576743	2.66544	0.914049	11.2308	6.93994	5.65542e-07	0.000273263	6.30706
MICB	1.22423	9.94639	10.0205	1.13092e-09	1.74105e-07	12.3271	0.236872	9.94639	1.93882	0.0654213	0.40573	-4.76622
MIDN	-0.657473	9.85435	-8.79184	1.163e-08	1.19841e-06	9.99853	0.372295	9.85435	4.9784	5.51023e-05	0.00659093	1.88079
MIZF	0.63192	8.75418	10.1167	9.49679e-10	1.50475e-07	12.5012	0.324991	8.75418	5.20291	3.20114e-05	0.00460831	2.40629
MMACHC	-0.6508	9.24806	-11.0519	1.83836e-10	4.04125e-08	14.1334	-0.255107	9.24806	-4.33225	0.000266558	0.0185043	0.358928
MRP63	-0.810949	8.87872	-8.62426	1.62216e-08	1.57969e-06	9.66528	-0.391483	8.87872	-4.16333	0.000402947	0.0239812	-0.0385471
MRPL18	1.32824	11.2656	8.56709	1.8187e-08	1.74374e-06	9.55071	0.131797	11.2656	0.850083	0.404411	0.806928	-6.17641
MT1A	3.4031	11.7639	40.405	3.51139e-22	3.42725e-18	37.8643	3.74891	11.7639	44.5108	4.25669e-23	3.46225e-19	33.4297
MT1E	2.55683	7.86838	24.8192	1.30172e-17	5.29388e-14	29.6486	4.74214	7.86838	46.032	2.04364e-23	2.49334e-19	33.6888
MT1F	4.03867	10.7409	58.9671	9.0435e-26	4.41341e-21	42.7223	4.80543	10.7409	70.1623	1.99266e-27	4.86229e-23	36.0823
MT1G	3.25346	7.76143	22.6189	9.36756e-17	3.2654e-13	27.9152	4.04422	7.76143	28.1164	9.00851e-19	3.99667e-15	28.7069
MT1H	3.19015	7.84258	28.9876	4.6739e-19	2.28096e-15	32.4506	4.40367	7.84258	40.0145	4.33829e-22	2.35241e-18	32.5328
MT1JP	3.43773	8.17403	45.806	2.27551e-23	3.70165e-19	39.6468	5.97633	8.17403	79.6314	1.23349e-28	6.01969e-24	36.5442
MT1X	3.33516	12.0084	37.082	2.27119e-21	1.38548e-17	36.5555	3.53993	12.0084	39.3587	6.21627e-22	3.03366e-18	32.3831
MT2A	3.72411	11.8385	42.796	1.00307e-22	1.2238e-18	38.7011	3.91245	11.8385	44.9604	3.41813e-23	3.33623e-19	33.5083
MUM1	1.0672	9.86215	9.59309	2.49029e-09	3.37766e-07	11.5397	-0.122152	9.86215	-1.09804	0.28403	0.723189	-5.93966
MXD1	1.37572	7.65748	18.2442	8.51256e-15	1.43252e-11	23.7929	0.254664	7.65748	3.37724	0.00270735	0.0728058	-1.85633
NANP	-0.497078	8.01621	-4.19382	0.000373999	0.00738346	-0.376805	-0.654844	8.01621	-5.52488	1.47906e-05	0.00271527	3.15372
NKTR	-0.610054	10.8198	-4.79505	8.60517e-05	0.00219524	1.07675	0.143057	10.8198	1.12443	0.272916	0.714501	-5.91125
NOC3L	-0.588031	9.1998	-3.49737	0.00203077	0.0293908	-2.03064	-0.4084	9.1998	-2.429	0.0237384	0.245026	-3.87046
NOL11	-0.880754	11.0169	-8.15267	4.22073e-08	3.58227e-06	8.70682	-0.273452	11.0169	-2.5312	0.019	0.215411	-3.66867
NOTCH1	0.641522	11.0212	3.9849	0.000623076	0.0112163	-0.878459	0.504936	11.0212	3.13648	0.00478671	0.101522	-2.39311
OSGIN1	0.733802	7.27398	9.50628	2.93139e-09	3.85036e-07	11.3768	0.202918	7.27398	2.62876	0.0153142	0.193771	-3.47189
PHF15	-0.609306	8.87688	-7.33313	2.38629e-07	1.53231e-05	6.9686	0.189693	8.87688	2.28299	0.0324246	0.289501	-4.1504
PMAIP1	0.837823	7.32974	10.5135	4.67408e-10	8.54325e-08	13.2068	0.158452	7.32974	1.98835	0.0593201	0.387142	-4.68175
PNLDC1	2.55412	7.53337	10.3567	6.17199e-10	1.0681e-07	12.9303	1.48712	7.53337	6.03009	4.49172e-06	0.00120679	4.30707
POLR1B	-0.680392	8.43147	-7.63448	1.24896e-07	9.04328e-06	7.61841	-0.291051	8.43147	-3.2658	0.00352864	0.0851233	-2.10642
PPP1R15A	3.83263	9.67613	11.9761	3.98583e-11	1.15099e-08	15.6452	2.37185	9.67613	7.41149	2.0142e-07	0.000121354	7.2989
PPP2CB	0.738454	10.2593	7.27024	2.73565e-07	1.72934e-05	6.83145	0.391158	10.2593	3.85104	0.000863338	0.0375849	-0.769068
PSMD5	-0.586596	9.24166	-5.84682	6.89977e-06	0.000263889	3.59428	-0.38011	9.24166	-3.7887	0.00100458	0.0412327	-0.913869
RASD1	0.293788	7.17447	2.19403	0.0390572	0.266994	-4.8138	0.614701	7.17447	4.59064	0.000141696	0.0123419	0.968123
RGS16	1.61517	7.4176	17.0365	3.50339e-14	3.88574e-11	22.4612	0.603186	7.4176	6.36228	2.08327e-06	0.000691616	5.0497
RGS2	1.36818	7.64262	11.8745	4.69514e-11	1.30933e-08	15.4837	0.632655	7.64262	5.49083	1.60421e-05	0.00284687	3.07508
RHEBL1	0.704858	7.48776	9.07858	6.63703e-09	7.53257e-07	10.5599	-0.0414521	7.48776	-0.533904	0.598748	0.898171	-6.39535
RIOK1	-0.545023	9.05337	-3.81747	0.000936777	0.0157209	-1.27768	-0.651397	9.05337	-4.56253	0.000151768	0.0128437	0.901855
RPUSD2	-0.715911	11.0471	-7.61754	1.29483e-07	9.30635e-06	7.58222	-0.221303	11.0471	-2.35475	0.0278444	0.266496	-4.0141
RRS1	-1.10678	10.1954	-14.3171	1.19565e-12	6.5562e-10	19.0764	-0.17179	10.1954	-2.22224	0.0368308	0.306309	-4.26378
SAC3D1	-0.755892	10.8312	-5.54174	1.42082e-05	0.000487958	2.87176	-0.482354	10.8312	-3.53632	0.00184931	0.0591549	-1.49512
SERPINH1	4.14354	8.34815	13.7517	2.66874e-12	1.22868e-09	18.296	1.82055	8.34815	6.04211	4.36761e-06	0.00119077	4.33417
SERTAD1	0.730942	8.45812	3.87494	0.000814561	0.0140318	-1.14099	0.47428	8.45812	2.5143	0.0197171	0.219529	-3.70235
SFRS1	-0.673344	12.1316	-7.78712	9.0394e-08	6.96905e-06	7.94284	-0.190255	12.1316	-2.20026	0.038555	0.313275	-4.30434
SLC25A12	-0.606323	8.48454	-7.35162	2.29255e-07	1.49374e-05	7.00882	-0.202482	8.48454	-2.45507	0.0224347	0.237497	-3.81941
SLC30A1	3.08501	7.75028	17.8169	1.39075e-14	2.12098e-11	23.3327	1.86124	7.75028	10.7493	3.09385e-10	5.03286e-07	13.3945
SLC7A11	2.0586	7.53124	10.1	9.78808e-10	1.53594e-07	12.4711	1.32123	7.53124	6.48227	1.5835e-06	0.000589081	5.31456
SPTY2D1	0.703908	9.11839	7.76892	9.39306e-08	7.19624e-06	7.90433	0.0684797	9.11839	0.755799	0.457765	0.834884	-6.25167
STIP1	1.31461	11.875	6.66335	1.05032e-06	5.20962e-05	5.48121	0.623199	11.875	3.1588	0.00454231	0.0983611	-2.34393
STK40	0.640351	10.8212	5.57427	1.31492e-05	0.000458364	2.94918	0.0956256	10.8212	0.832422	0.414092	0.811681	-6.19114
SURF6	-0.993364	11.1532	-11.5468	8.0192e-11	1.9666e-08	14.9549	-0.13303	11.1532	-1.54632	0.136253	0.549422	-5.3793
TADA1L	-0.623385	7.75648	-6.32297	2.28e-06	0.000100605	4.70374	-0.174329	7.75648	-1.76821	0.0908547	0.468947	-5.04544
TBRG4	-0.753013	10.4255	-8.27578	3.279e-08	2.85244e-06	8.95997	-0.0692012	10.4255	-0.760537	0.454987	0.833655	-6.24809
THAP11	-0.884295	11.6224	-8.53234	1.95003e-08	1.83363e-06	9.48085	-0.577133	11.6224	-5.56862	1.33271e-05	0.00255401	3.25459
TIGD5	-0.938571	9.40334	-10.917	2.31569e-10	4.9135e-08	13.9044	-0.0666637	9.40334	-0.775399	0.446337	0.82888	-6.23671
TMEM177	-0.996203	9.65841	-12.6277	1.42852e-11	4.67884e-09	16.655	-0.196821	9.65841	-2.49488	0.0205726	0.225665	-3.74091
TMEM66	0.91484	11.7085	10.8729	2.49825e-10	5.23259e-08	13.8291	0.160721	11.7085	1.91017	0.0691974	0.416925	-4.8144
TPD52	0.595753	9.14229	7.33383	2.38266e-07	1.532e-05	6.97012	0.177246	9.14229	2.18194	0.0400484	0.319381	-4.33796
TPD52L2	0.906189	11.7302	7.37575	2.17588e-07	1.42725e-05	7.06125	0.384866	11.7302	3.13254	0.00483118	0.101913	-2.40178
TRMT12	-0.702481	9.01886	-10.7646	3.01243e-10	6.02511e-08	13.6433	-0.232198	9.01886	-3.55814	0.00175467	0.057421	-1.44522
TUBGCP5	-1.10553	9.11808	-10.0315	1.10849e-09	1.71736e-07	12.3471	-0.0474669	9.11808	-0.430709	0.670859	0.92335	-6.44576
UBB	0.657888	13.3937	6.48989	1.55625e-06	7.28168e-05	5.08675	0.156635	13.3937	1.54516	0.136533	0.549446	-5.38095
UBC	1.13659	7.35905	7.44948	1.85581e-07	1.25614e-05	7.22095	0.0475423	7.35905	0.311603	0.758268	0.948039	-6.49074
WBP5	1.567	10.5574	13.7705	2.59766e-12	1.20734e-09	18.3223	0.818499	10.5574	7.19278	3.23944e-07	0.000173727	6.84285
ZBED5	-0.736517	9.96706	-5.42435	1.88049e-05	0.000613856	2.59173	0.0330917	9.96706	0.243716	0.809703	0.959384	-6.50997
ZFAND2A	2.62606	10.5503	11.486	8.86694e-11	2.15286e-08	14.8555	1.31751	10.5503	5.7626	8.4144e-06	0.00180898	3.69973
ZFP36	0.630528	9.32607	6.41176	1.86009e-06	8.42077e-05	4.90787	0.33891	9.32607	3.44633	0.00229519	0.0665544	-1.70001
ZNF16	0.98619	7.68565	11.0177	1.94878e-10	4.26477e-08	14.0756	0.51348	7.68565	5.7366	8.94742e-06	0.00189849	3.64028
ZNF24	0.607202	7.95858	7.44536	1.87236e-07	1.26208e-05	7.21204	0.087782	7.95858	1.07636	0.293397	0.730533	-5.96253
ZNF275	0.893975	9.59233	13.665	3.02564e-12	1.37997e-09	18.1737	0.222451	9.59233	3.40032	0.00256221	0.0706446	-1.80421
ZNF365	0.730663	8.02933	10.8799	2.46842e-10	5.20167e-08	13.8411	0.323274	8.02933	4.81367	8.22363e-05	0.00866803	1.49364
ZNF394	1.12556	8.15645	11.3343	1.14132e-10	2.67783e-08	14.6057	0.23332	8.15645	2.34953	0.0281562	0.268074	-4.0241
ZNF408	0.660727	7.74272	5.74358	8.80106e-06	0.000323182	3.35071	0.421287	7.74272	3.66217	0.0013651	0.0499773	-1.20637
ZNF548	1.24602	8.82162	14.8232	5.95439e-13	3.92684e-10	19.751	0.314212	8.82162	3.73799	0.00113614	0.0446424	-1.03134
ZNF627	0.637995	8.08084	6.79769	7.76609e-07	4.04483e-05	5.78417	0.543654	8.08084	5.79251	7.8411e-06	0.00173937	3.76802
ZSWIM6	0.693696	7.70718	7.83355	8.19776e-08	6.3806e-06	8.04091	0.254278	7.70718	2.87143	0.00885208	0.143377	-2.96671
