# Supplementary material
Source: publisher figshare collection journal article supplement (https://plos.figshare.com/articles/dataset/_/750110)
Supplement: Supplementary file 1 [file 1 › Table_S8.xlsx]

## Sheet: MDDC
Table S8. The differentially expressed genes in MDDCs after 10µg/ml ZnO-1 exposure
Cut off: logFC>0.585 (=FC>1.5) and adjP-value <0.05
	6h							24h								Annotations
ID	logFC	AveExpr	t	P.Value	adj.P.Val	B	DEG in 6h	logFC	AveExpr	t	P.Value	adj.P.Val	B	DEG in 24h	DEG total	HGNC symbol	Chromosome Name	Description
ENSG00000125144	5.05834	11.1571	13.1804	3.9e-09	6.87e-05	6.6839	1	4.94646	11.1571	19.6881	2.15e-11	3.78e-07	3.2224	1	2	MT1G	16	metallothionein 1G [Source:HGNC Symbol;Acc:7399]
ENSG00000125148	2.01505	11.9559	7.74955	2.37e-06	0.0104179	3.56143	1	2.11589	11.9559	12.43	8.18e-09	4.8e-05	2.48779	1	2	MT2A	16	metallothionein 2A [Source:HGNC Symbol;Acc:7406]
ENSG00000169715	4.65173	7.84677	8.21163	1.22e-06	0.0071928	3.95283	1	3.72471	7.84677	10.0437	1.14e-07	0.000501217	1.94499	1	2	MT1E	16	metallothionein 1E [Source:HGNC Symbol;Acc:7397]
ENSG00000205362	8.3986	7.01627	7.36606	4.17e-06	0.0146804	3.21225	1	6.06229	7.01627	8.12182	1.39e-06	0.00489472	1.25878	1	2	MT1A	16	metallothionein 1A [Source:HGNC Symbol;Acc:7393]
ENSG00000205364	8.86815	7.856	11.5743	2e-08	0.000175809	6.03351	1	7.4726	7.856	14.8978	8.15e-10	7.18e-06	2.84056	1	2	MT1M	16	metallothionein 1M [Source:HGNC Symbol;Acc:14296]

## Sheet: HMDM
Table S8. The differentially expressed genes in HMDMs after 10µg/ml ZnO-1 exposure
Cut off: logFC>0.585 (=FC>1.5) and adjP-value <0.05
	6h							24h								Annotations
ID	logFC	AveExpr	t	P.Value	adj.P.Val	B	DEG in 6h	logFC	AveExpr	t	P.Value	adj.P.Val	B	DEG in 24h	DEG in total	HGNC symbol	Chromosome Name	Description
ENSG00000000971	0.208657	4.80748	0.631052	0.543013	0.741062	-6.86633	0	2.55646	4.80748	7.73163	2.24016e-05	0.000648223	3.00095	1	1	CFH	1	complement factor H [Source:HGNC Symbol;Acc:4883]
ENSG00000001036	-0.387758	8.29274	-2.87186	0.0176076	0.0796281	-3.83553	0	-0.597474	8.29274	-4.42508	0.00148448	0.0129244	-1.41494	1	1	FUCA2	6	fucosidase, alpha-L- 2, plasma [Source:HGNC Symbol;Acc:4008]
ENSG00000001561	0.0627944	4.32213	0.313766	0.760536	0.87874	-7.02673	0	0.716914	4.32213	3.58222	0.0054916	0.0336038	-2.77551	1	1	ENPP4	6	ectonucleotide pyrophosphatase/phosphodiesterase 4 (putative) [Source:HGNC Symbol;Acc:3359]
ENSG00000002587	0.00398854	7.17745	0.0134529	0.989547	0.995258	-7.08042	0	1.93339	7.17745	6.5211	8.83731e-05	0.00169952	1.55576	1	1	HS3ST1	4	heparan sulfate (glucosamine) 3-O-sulfotransferase 1 [Source:HGNC Symbol;Acc:5194]
ENSG00000002822	0.334074	6.85141	2.36128	0.0413277	0.14515	-4.67961	0	-0.884764	6.85141	-6.25364	0.000122525	0.00212389	1.21104	1	1	MAD1L1	7	MAD1 mitotic arrest deficient-like 1 (yeast) [Source:HGNC Symbol;Acc:6762]
ENSG00000003147	0.989536	5.11395	4.09372	0.00245467	0.0204173	-1.81926	1	1.31766	5.11395	5.45117	0.000345581	0.0044667	0.117201	1	2	ICA1	7	islet cell autoantigen 1, 69kDa [Source:HGNC Symbol;Acc:5343]
ENSG00000003436	2.49051	7.93599	7.20178	4.00189e-05	0.00143659	2.48102	1	1.32006	7.93599	3.81719	0.00377798	0.0256652	-2.3886	1	2	TFPI	2	tissue factor pathway inhibitor (lipoprotein-associated coagulation inhibitor) [Source:HGNC Symbol;Acc:11760]
ENSG00000004399	-0.658548	8.69291	-3.55196	0.00576538	0.0368403	-2.70092	1	-0.825579	8.69291	-4.45286	0.00142419	0.0125638	-1.37153	1	2	PLXND1	3	plexin D1 [Source:HGNC Symbol;Acc:9107]
ENSG00000004455	1.36804	6.78112	10.2134	2.1054e-06	0.000237762	5.51211	1	-0.466911	6.78112	-3.48581	0.00641461	0.0378707	-2.93558	0	1	AK2	1	adenylate kinase 2 [Source:HGNC Symbol;Acc:362]
ENSG00000004468	1.05028	6.93544	3.60432	0.00530028	0.0347507	-2.6145	1	1.61773	6.93544	5.5517	0.000302028	0.00408352	0.259228	1	2	CD38	4	CD38 molecule [Source:HGNC Symbol;Acc:1667]
ENSG00000004478	2.43063	8.20232	10.6873	1.41657e-06	0.000187637	5.91202	1	2.69695	8.20232	11.8583	5.65967e-07	6.8763e-05	6.80946	1	2	FKBP4	12	FK506 binding protein 4, 59kDa [Source:HGNC Symbol;Acc:3720]
ENSG00000004487	0.0938992	8.25631	0.762378	0.464495	0.681918	-6.77082	0	0.645386	8.25631	5.23997	0.000460769	0.00545947	-0.185935	1	1	KDM1A	1	lysine (K)-specific demethylase 1A [Source:HGNC Symbol;Acc:29079]
ENSG00000004848	-0.0751318	4.23503	-0.373329	0.717167	0.853191	-7.00454	0	2.77349	4.23503	13.7814	1.4745e-07	3.06191e-05	8.15799	1	1	ARX	X	aristaless related homeobox [Source:HGNC Symbol;Acc:18060]
ENSG00000005059	-0.776319	7.10858	-6.4028	0.000102001	0.0025062	1.50414	1	-0.312712	7.10858	-2.57913	0.0287151	0.114893	-4.45274	0	1	CCDC109B	4	coiled-coil domain containing 109B [Source:HGNC Symbol;Acc:26076]
ENSG00000005175	-1.46513	5.95321	-7.12856	4.34653e-05	0.00149796	2.39493	1	-0.972498	5.95321	-4.73168	0.000945194	0.00924088	-0.941644	1	2	RPAP3	12	RNA polymerase II associated protein 3 [Source:HGNC Symbol;Acc:26151]
ENSG00000005238	1.16201	7.36037	7.1092	4.44298e-05	0.0015169	2.37205	1	1.24971	7.36037	7.64578	2.45595e-05	0.000691158	2.90432	1	2	KIAA1539	9	KIAA1539 [Source:HGNC Symbol;Acc:25666]
ENSG00000005249	0.338892	4.70976	1.46843	0.17457	0.380712	-6.01488	0	1.77185	4.70976	7.67752	2.37363e-05	0.000675095	2.94015	1	1	PRKAR2B	7	protein kinase, cAMP-dependent, regulatory, type II, beta [Source:HGNC Symbol;Acc:9392]
ENSG00000005436	-0.937318	5.2346	-5.60423	0.000281655	0.00490793	0.440914	1	-0.447074	5.2346	-2.67306	0.0245397	0.102337	-4.29666	0	1	C2orf3	2	chromosome 2 open reading frame 3 [Source:HGNC Symbol;Acc:1317]
ENSG00000005471	-0.341062	4.27084	-1.5538	0.153152	0.349719	-5.90103	0	0.841177	4.27084	3.8322	0.00368964	0.0252135	-2.36406	1	1	ABCB4	7	ATP-binding cassette, sub-family B (MDR/TAP), member 4 [Source:HGNC Symbol;Acc:45]
ENSG00000005486	1.20185	7.69285	5.92862	0.000184535	0.00374021	0.883696	1	1.65906	7.69285	8.18401	1.39706e-05	0.000477901	3.49634	1	2	RHBDD2	7	rhomboid domain containing 2 [Source:HGNC Symbol;Acc:23082]
ENSG00000005810	-0.756542	9.53775	-4.40517	0.00152935	0.0147066	-1.32744	1	-0.482475	9.53775	-2.80934	0.0195423	0.086545	-4.06899	0	1	MYCBP2	13	MYC binding protein 2 [Source:HGNC Symbol;Acc:23386]
ENSG00000005812	0.17151	8.76839	1.17711	0.268036	0.494501	-6.37087	0	0.607227	8.76839	4.16753	0.00219163	0.017084	-1.8221	1	1	FBXL3	13	F-box and leucine-rich repeat protein 3 [Source:HGNC Symbol;Acc:13599]
ENSG00000005889	0.996781	5.24658	7.24202	3.82522e-05	0.00139811	2.52805	1	0.0305745	5.24658	0.222136	0.828949	0.920086	-7.18965	0	1	ZFX	X	zinc finger protein, X-linked [Source:HGNC Symbol;Acc:12869]
ENSG00000006007	-0.779484	8.27055	-4.45841	0.00141247	0.0139325	-1.24463	1	-0.518081	8.27055	-2.96326	0.0151231	0.0718534	-3.81081	0	1	GDE1	16	glycerophosphodiester phosphodiesterase 1 [Source:HGNC Symbol;Acc:29644]
ENSG00000006015	-0.216748	8.34105	-0.985494	0.349016	0.578812	-6.57302	0	-0.85464	8.34105	-3.88582	0.00339135	0.0237085	-2.27657	1	1	C19orf60	19	chromosome 19 open reading frame 60 [Source:HGNC Symbol;Acc:26098]
ENSG00000006075	1.84635	10.7791	4.85372	0.000792719	0.00945709	-0.641871	1	2.2471	10.7791	5.90721	0.000189675	0.00291834	0.749947	1	2	CCL3	17	chemokine (C-C motif) ligand 3 [Source:HGNC Symbol;Acc:10627]
ENSG00000006118	0.717955	4.73487	4.59368	0.00115621	0.0121751	-1.03594	1	1.15	4.73487	7.35804	3.3618e-05	0.000856178	2.57417	1	2	TMEM132A	11	transmembrane protein 132A [Source:HGNC Symbol;Acc:31092]
ENSG00000006327	2.10395	6.69008	12.0486	4.91295e-07	0.000107308	6.96758	1	1.24163	6.69008	7.11043	4.43681e-05	0.00103803	2.28208	1	2	TNFRSF12A	16	tumor necrosis factor receptor superfamily, member 12A [Source:HGNC Symbol;Acc:18152]
ENSG00000006451	0.174292	9.18908	1.03714	0.325561	0.55608	-6.52131	0	1.04684	9.18908	6.22929	0.000126283	0.0021747	1.17917	1	1	RALA	7	v-ral simian leukemia viral oncogene homolog A (ras related) [Source:HGNC Symbol;Acc:9839]
ENSG00000006652	0.686455	7.83438	3.60295	0.00531197	0.0348014	-2.61676	1	0.449619	7.83438	2.35988	0.0414242	0.148781	-4.813	0	1	IFRD1	7	interferon-related developmental regulator 1 [Source:HGNC Symbol;Acc:5456]
ENSG00000006715	-0.679127	6.77063	-6.47877	9.30076e-05	0.00236438	1.60066	1	-0.575028	6.77063	-5.48567	0.000329915	0.00432949	0.16611	0	1	VPS41	7	vacuolar protein sorting 41 homolog (S. cerevisiae) [Source:HGNC Symbol;Acc:12713]
ENSG00000007237	-0.681445	7.68053	-3.48641	0.00640839	0.0395902	-2.80941	1	-0.276312	7.68053	-1.41367	0.189645	0.408931	-6.22018	0	1	GAS7	17	growth arrest-specific 7 [Source:HGNC Symbol;Acc:4169]
ENSG00000007255	-0.411161	7.30862	-3.66452	0.00481369	0.0326415	-2.51542	0	-1.27891	7.30862	-11.3984	8.03494e-07	8.42568e-05	6.4532	1	1	TRAPPC6A	19	trafficking protein particle complex 6A [Source:HGNC Symbol;Acc:23069]
ENSG00000007264	0.0466268	5.78165	0.151795	0.88255	0.944596	-7.06788	0	1.42782	5.78165	4.64833	0.00106717	0.0101015	-1.06903	1	1	MATK	19	megakaryocyte-associated tyrosine kinase [Source:HGNC Symbol;Acc:6906]
ENSG00000008083	0.961265	6.74914	3.86526	0.00350262	0.0263137	-2.18742	1	0.0152912	6.74914	0.061486	0.952257	0.979265	-7.21465	0	1	JARID2	6	jumonji, AT rich interactive domain 2 [Source:HGNC Symbol;Acc:6196]
ENSG00000008394	1.07233	9.69232	4.74402	0.000928441	0.0104647	-0.806957	1	1.81063	9.69232	8.0103	1.67073e-05	0.00053907	3.3088	1	2	MGST1	12	microsomal glutathione S-transferase 1 [Source:HGNC Symbol;Acc:7061]
ENSG00000008405	0.420221	8.30673	2.89522	0.0169355	0.077434	-3.79646	0	-1.02764	8.30673	-7.08016	4.59203e-05	0.00106588	2.24587	1	1	CRY1	12	cryptochrome 1 (photolyase-like) [Source:HGNC Symbol;Acc:2384]
ENSG00000008516	0.538313	5.98519	3.3141	0.00848006	0.0477753	-3.0959	0	3.29432	5.98519	20.2813	4.32566e-09	4.05405e-06	11.4957	1	1	MMP25	16	matrix metallopeptidase 25 [Source:HGNC Symbol;Acc:14246]
ENSG00000008952	0.0431845	7.64349	0.364902	0.723243	0.856505	-7.0079	0	0.708006	7.64349	5.98253	0.000172251	0.002724	0.85162	1	1	SEC62	3	SEC62 homolog (S. cerevisiae) [Source:HGNC Symbol;Acc:11846]
ENSG00000009790	-0.566976	5.58032	-2.11876	0.0618176	0.19224	-5.06731	0	-1.0446	5.58032	-3.90364	0.00329797	0.0232402	-2.24757	1	1	TRAF3IP3	1	TRAF3 interacting protein 3 [Source:HGNC Symbol;Acc:30766]
ENSG00000010165	-0.712238	6.69922	-7.07402	4.62427e-05	0.00154584	2.33036	1	-0.331458	6.69922	-3.29207	0.00879099	0.0479328	-3.25898	0	1	METTL13	1	methyltransferase like 13 [Source:HGNC Symbol;Acc:24248]
ENSG00000010219	0.0790529	7.79919	0.397209	0.700064	0.842189	-6.99459	0	-1.58916	7.79919	-7.98487	1.71548e-05	0.000547493	3.28107	1	1	DYRK4	12	dual-specificity tyrosine-(Y)-phosphorylation regulated kinase 4 [Source:HGNC Symbol;Acc:3095]
ENSG00000010278	-0.536827	11.0508	-2.27841	0.0474458	0.159962	-4.81346	0	-1.46216	11.0508	-6.20573	0.000130038	0.00223065	1.14825	1	1	CD9	12	CD9 molecule [Source:HGNC Symbol;Acc:1709]
ENSG00000010295	-0.966215	6.53358	-9.98486	2.56309e-06	0.000272011	5.31273	1	-0.0916972	6.53358	-0.947598	0.367008	0.606059	-6.74498	0	1	IFFO1	12	intermediate filament family orphan 1 [Source:HGNC Symbol;Acc:24970]
ENSG00000010322	-1.09561	8.92406	-7.78173	2.12386e-05	0.000980076	3.13983	1	0.0367838	8.92406	0.261261	0.799514	0.902829	-7.17931	0	1	NISCH	3	nischarin [Source:HGNC Symbol;Acc:18006]
ENSG00000010327	-0.223523	9.4443	-1.40269	0.192798	0.405237	-6.09981	0	-0.987229	9.4443	-6.19522	0.000131751	0.00225345	1.13444	1	1	STAB1	3	stabilin 1 [Source:HGNC Symbol;Acc:18628]
ENSG00000010404	-0.154715	8.42021	-1.4383	0.182731	0.391769	-6.05412	0	0.907512	8.42021	8.43665	1.08264e-05	0.000405804	3.76329	1	1	IDS	X	iduronate 2-sulfatase [Source:HGNC Symbol;Acc:5389]
ENSG00000010438	0.271134	3.90434	0.695585	0.503487	0.711929	-6.82142	0	1.27829	3.90434	3.27941	0.00897514	0.0487702	-3.28019	1	1	PRSS3	9	protease, serine, 3 [Source:HGNC Symbol;Acc:9486]
ENSG00000010671	-1.3274	7.6313	-11.0553	1.05222e-06	0.000162605	6.21042	1	-0.450288	7.6313	-3.75022	0.00420011	0.0277649	-2.49837	0	1	BTK	X	Bruton agammaglobulinemia tyrosine kinase [Source:HGNC Symbol;Acc:1133]
ENSG00000010810	0.66509	7.68874	1.4948	0.16769	0.371176	-5.98013	0	2.8412	7.68874	6.38564	0.000104159	0.00189368	1.38238	1	1	FYN	6	FYN oncogene related to SRC, FGR, YES [Source:HGNC Symbol;Acc:4037]
ENSG00000010818	2.43884	6.08989	6.3203	0.000112847	0.00268038	1.39844	1	0.957269	6.08989	2.48078	0.0338498	0.129553	-4.61516	0	1	HIVEP2	6	human immunodeficiency virus type I enhancer binding protein 2 [Source:HGNC Symbol;Acc:4921]
ENSG00000011009	-0.61029	10.402	-5.84956	0.000204296	0.0039507	0.777174	1	-0.557093	10.402	-5.33968	0.000401936	0.00498304	-0.0420161	0	1	LYPLA2	1	lysophospholipase II [Source:HGNC Symbol;Acc:6738]
ENSG00000011201	-1.10067	6.30288	-4.85084	0.000796006	0.00947516	-0.646194	1	-0.0304646	6.30288	-0.134262	0.89602	0.952867	-7.20682	0	1	KAL1	X	Kallmann syndrome 1 sequence [Source:HGNC Symbol;Acc:6211]
ENSG00000011260	-0.777861	4.73571	-4.65806	0.0010521	0.011378	-0.937483	1	-0.401184	4.73571	-2.40241	0.0385861	0.142127	-4.74367	0	1	UTP18	17	UTP18, small subunit (SSU) processome component, homolog (yeast) [Source:HGNC Symbol;Acc:24274]
ENSG00000011376	-0.626697	6.14125	-3.33951	0.00813527	0.0463816	-3.05353	1	-0.353901	6.14125	-1.88585	0.0904818	0.254067	-5.55834	0	1	LARS2	3	leucyl-tRNA synthetase 2, mitochondrial [Source:HGNC Symbol;Acc:17095]
ENSG00000011422	1.59485	9.84544	7.81491	2.05048e-05	0.000957917	3.17632	1	1.56073	9.84544	7.64769	2.45091e-05	0.000690842	2.90649	1	2	PLAUR	19	plasminogen activator, urokinase receptor [Source:HGNC Symbol;Acc:9053]
ENSG00000011638	-0.671453	6.25094	-2.7669	0.0209773	0.0899822	-4.01078	0	-1.7233	6.25094	-7.10132	4.48288e-05	0.00104464	2.27121	1	1	TMEM159	16	transmembrane protein 159 [Source:HGNC Symbol;Acc:30136]
ENSG00000012061	-0.384297	6.84154	-3.15148	0.0110747	0.0572922	-3.36754	0	-0.871889	6.84154	-7.15006	4.24211e-05	0.00100867	2.32934	1	1	ERCC1	19	excision repair cross-complementing rodent repair deficiency, complementation group 1 (includes overlapping antisense sequence) [Source:HGNC Symbol;Acc:3433]
ENSG00000012779	-1.58473	6.48623	-7.07507	4.61871e-05	0.00154584	2.33161	1	0.22013	6.48623	0.982779	0.350283	0.589517	-6.711	0	1	ALOX5	10	arachidonate 5-lipoxygenase [Source:HGNC Symbol;Acc:435]
ENSG00000012983	0.0589315	6.41095	0.395066	0.701591	0.843411	-6.9955	0	-0.594074	6.41095	-3.98256	0.00291566	0.0212165	-2.11949	1	1	MAP4K5	14	mitogen-activated protein kinase kinase kinase kinase 5 [Source:HGNC Symbol;Acc:6867]
ENSG00000013364	0.406367	6.26896	3.43975	0.0069113	0.0413715	-2.88682	0	1.15421	6.26896	9.77001	3.09454e-06	0.000187366	5.06726	1	1	MVP	16	major vault protein [Source:HGNC Symbol;Acc:7531]
ENSG00000013375	0.777772	5.70817	5.26933	0.000442539	0.00649678	-0.0321625	1	0.483926	5.70817	3.27855	0.00898776	0.0488093	-3.28163	0	1	PGM3	6	phosphoglucomutase 3 [Source:HGNC Symbol;Acc:8907]
ENSG00000013392	0.790607	5.48834	6.23505	0.000125383	0.00285753	1.28823	1	1.76289	5.48834	13.9028	1.36235e-07	2.93861e-05	8.23625	1	2	RWDD2A	6	RWD domain containing 2A [Source:HGNC Symbol;Acc:21385]
ENSG00000013503	-1.41625	5.22612	-6.83161	6.11511e-05	0.00178656	2.0388	1	-1.09082	5.22612	-5.26182	0.000447124	0.00536214	-0.154269	1	2	POLR3B	12	polymerase (RNA) III (DNA directed) polypeptide B [Source:HGNC Symbol;Acc:30348]
ENSG00000013583	-0.0317035	9.90604	-0.197379	0.847724	0.926104	-7.05917	0	-1.53174	9.90604	-9.5363	3.81362e-06	0.000208944	4.85067	1	1	HEBP1	12	heme binding protein 1 [Source:HGNC Symbol;Acc:17176]
ENSG00000013588	1.33298	3.69251	7.39507	3.22703e-05	0.00127754	2.7051	1	0.0601096	3.69251	0.333475	0.746079	0.873334	-7.15591	0	1	GPRC5A	12	G protein-coupled receptor, family C, group 5, member A [Source:HGNC Symbol;Acc:9836]
ENSG00000013619	2.06304	4.63307	16.472	2.92218e-08	2.45143e-05	9.65634	1	0.795991	4.63307	6.35544	0.000108081	0.00195289	1.34338	1	2	MAMLD1	X	mastermind-like domain containing 1 [Source:HGNC Symbol;Acc:2568]
ENSG00000015133	-0.600149	4.08667	-4.20494	0.00206986	0.0181555	-1.64223	1	-0.831528	4.08667	-5.82608	0.000210598	0.00315217	0.639546	1	2	CCDC88C	14	coiled-coil domain containing 88C [Source:HGNC Symbol;Acc:19967]
ENSG00000015171	0.493037	4.84659	3.62281	0.00514559	0.0341812	-2.58404	0	1.15291	4.84659	8.47153	1.04568e-05	0.000397022	3.79962	1	1	ZMYND11	10	zinc finger, MYND-type containing 11 [Source:HGNC Symbol;Acc:16966]
ENSG00000017260	0.949084	8.616	7.05673	4.7163e-05	0.00154952	2.30981	1	0.914945	8.616	6.80289	6.32385e-05	0.0013276	1.90866	1	2	ATP2C1	3	ATPase, Ca++ transporting, type 2C, member 1 [Source:HGNC Symbol;Acc:13211]
ENSG00000017427	-1.5458	7.6145	-4.65396	0.00105842	0.0114254	-0.94374	1	-4.82733	7.6145	-14.5337	9.1228e-08	2.55775e-05	8.63097	1	2	IGF1	12	insulin-like growth factor 1 (somatomedin C) [Source:HGNC Symbol;Acc:5464]
ENSG00000018280	1.00283	5.97853	3.98501	0.00290459	0.0230185	-1.99371	1	3.18113	5.97853	12.6411	3.2019e-07	4.50115e-05	7.38444	1	2	SLC11A1	2	solute carrier family 11 (proton-coupled divalent metal ion transporters), member 1 [Source:HGNC Symbol;Acc:10907]
ENSG00000018510	-0.712916	6.4339	-5.77685	0.000224503	0.00423594	0.678412	1	-0.282767	6.4339	-2.2913	0.0464393	0.160869	-4.92415	0	1	AGPS	2	alkylglycerone phosphate synthase [Source:HGNC Symbol;Acc:327]
ENSG00000018699	-1.53323	6.30492	-4.97264	0.000669231	0.00847581	-0.464865	1	-1.3152	6.30492	-4.26552	0.00188762	0.0153599	-1.6662	1	2	TTC27	2	tetratricopeptide repeat domain 27 [Source:HGNC Symbol;Acc:25986]
ENSG00000019582	-0.610096	10.7352	-2.93563	0.0158339	0.0738735	-3.72884	0	-1.65084	10.7352	-7.94345	1.79123e-05	0.000558047	3.23574	1	1	CD74	5	CD74 molecule, major histocompatibility complex, class II invariant chain [Source:HGNC Symbol;Acc:1697]
ENSG00000019991	-0.51702	4.81586	-2.04463	0.0698405	0.208516	-5.18304	0	-2.94246	4.81586	-11.6364	6.69243e-07	7.58424e-05	6.63929	1	1	HGF	7	hepatocyte growth factor (hepapoietin A; scatter factor) [Source:HGNC Symbol;Acc:4893]
ENSG00000020181	1.40178	5.26809	9.00385	6.2394e-06	0.000487467	4.40446	1	3.28017	5.26809	21.0691	3.04241e-09	4.05405e-06	11.8075	1	2	GPR124	8	G protein-coupled receptor 124 [Source:HGNC Symbol;Acc:17849]
ENSG00000020426	0.62837	5.36218	4.56176	0.00121185	0.0125536	-1.08496	1	-0.226178	5.36218	-1.64197	0.133505	0.327782	-5.91325	0	1	MNAT1	14	menage a trois homolog 1, cyclin H assembly factor (Xenopus laevis) [Source:HGNC Symbol;Acc:7181]
ENSG00000022556	0.660805	4.29963	2.73919	0.0219713	0.0930899	-4.05696	0	1.0207	4.29963	4.23105	0.00198911	0.0159645	-1.7209	1	1	NLRP2	19	NLR family, pyrin domain containing 2 [Source:HGNC Symbol;Acc:22948]
ENSG00000022567	0.164876	5.44189	0.516729	0.617258	0.79091	-6.93592	0	-2.79439	5.44189	-8.75774	7.89706e-06	0.000329685	4.093	1	1	SLC45A4	8	solute carrier family 45, member 4 [Source:HGNC Symbol;Acc:29196]
ENSG00000023171	0.0192977	3.16054	0.210821	0.837517	0.922043	-7.05617	0	-0.71737	3.16054	-7.83702	2.0031e-05	0.000604256	3.11841	1	1	GRAMD1B	11	GRAM domain containing 1B [Source:HGNC Symbol;Acc:29214]
ENSG00000023287	0.746555	8.67065	5.88114	0.000196143	0.00386084	0.81982	1	0.421942	8.67065	3.32393	0.0083449	0.0459556	-3.20567	0	1	RB1CC1	8	RB1-inducible coiled-coil 1 [Source:HGNC Symbol;Acc:15574]
ENSG00000023445	1.37564	8.42112	4.36866	0.00161542	0.0151668	-1.38445	1	-0.0443842	8.42112	-0.140953	0.890876	0.950436	-7.20581	0	1	BIRC3	11	baculoviral IAP repeat containing 3 [Source:HGNC Symbol;Acc:591]
ENSG00000023516	-1.32355	8.75007	-12.9955	2.49976e-07	7.3397e-05	7.62954	1	-0.821718	8.75007	-8.06817	1.57354e-05	0.000517626	3.37165	1	2	AKAP11	13	A kinase (PRKA) anchor protein 11 [Source:HGNC Symbol;Acc:369]
ENSG00000023608	2.25512	5.503	7.05561	4.72231e-05	0.00154952	2.30848	1	0.546426	5.503	1.70961	0.120003	0.306524	-5.81733	0	1	SNAPC1	14	small nuclear RNA activating complex, polypeptide 1, 43kDa [Source:HGNC Symbol;Acc:11134]
ENSG00000023892	-1.45311	6.25595	-5.51568	0.000316911	0.00531716	0.317416	1	-0.192895	6.25595	-0.732185	0.481874	0.699908	-6.92992	0	1	DEF6	6	differentially expressed in FDCP 6 homolog (mouse) [Source:HGNC Symbol;Acc:2760]
ENSG00000023909	1.70413	8.32013	9.56258	3.72426e-06	0.000338198	4.93249	1	0.566026	8.32013	3.17621	0.0106325	0.055356	-3.45321	0	1	GCLM	1	glutamate-cysteine ligase, modifier subunit [Source:HGNC Symbol;Acc:4312]
ENSG00000025039	-0.309408	8.24957	-1.90862	0.0872047	0.241478	-5.39115	0	-1.73821	8.24957	-10.7223	1.37652e-06	0.000114387	5.90256	1	1	RRAGD	6	Ras-related GTP binding D [Source:HGNC Symbol;Acc:19903]
ENSG00000025293	0.596315	6.79593	5.02388	0.000622533	0.00809983	-0.389227	1	0.43345	6.79593	3.65176	0.00491273	0.031019	-2.6605	0	1	PHF20	20	PHD finger protein 20 [Source:HGNC Symbol;Acc:16098]
ENSG00000025434	-1.19555	7.50221	-5.88946	0.000194051	0.00384128	0.831045	1	0.402739	7.50221	1.98395	0.077138	0.228508	-5.40921	0	1	NR1H3	11	nuclear receptor subfamily 1, group H, member 3 [Source:HGNC Symbol;Acc:7966]
ENSG00000025708	-0.030681	4.54243	-0.242398	0.813667	0.909311	-7.04835	0	0.664859	4.54243	5.25278	0.000452717	0.00538887	-0.167365	1	1	TYMP	22	thymidine phosphorylase [Source:HGNC Symbol;Acc:3148]
ENSG00000026508	0.746274	10.7109	5.16926	0.000508072	0.00704472	-0.176684	1	1.37319	10.7109	9.51178	3.89911e-06	0.000211355	4.82766	1	2	CD44	11	CD44 molecule (Indian blood group) [Source:HGNC Symbol;Acc:1681]
ENSG00000026751	0.705472	8.29875	3.2225	0.00985315	0.0528733	-3.24879	0	1.99093	8.29875	9.09432	5.72925e-06	0.000265611	4.42758	1	1	SLAMF7	1	SLAM family member 7 [Source:HGNC Symbol;Acc:21394]
ENSG00000026950	-0.338483	3.53124	-3.6901	0.00462126	0.0318018	-2.47341	0	-0.739811	3.53124	-8.06533	1.57816e-05	0.000517626	3.36857	1	1	BTN3A1	6	butyrophilin, subfamily 3, member A1 [Source:HGNC Symbol;Acc:1138]
ENSG00000027001	-0.485227	6.71391	-2.70228	0.0233695	0.0969392	-4.1184	0	-0.86842	6.71391	-4.83632	0.000812751	0.00828816	-0.783071	1	1	MIPEP	13	mitochondrial intermediate peptidase [Source:HGNC Symbol;Acc:7104]
ENSG00000027697	-0.643863	9.93454	-2.8621	0.0178962	0.0804072	-3.85183	0	1.0049	9.93454	4.467	0.00139452	0.0123686	-1.34949	1	1	IFNGR1	6	interferon gamma receptor 1 [Source:HGNC Symbol;Acc:5439]
ENSG00000028116	-0.355045	9.09681	-1.97005	0.0789089	0.226131	-5.29788	0	1.5122	9.09681	8.39078	1.13343e-05	0.000419925	3.71532	1	1	VRK2	2	vaccinia related kinase 2 [Source:HGNC Symbol;Acc:12719]
ENSG00000028137	1.07738	8.38166	4.01313	0.00278041	0.0223972	-1.94845	1	-0.492603	8.38166	-1.8349	0.098238	0.268569	-5.63447	0	1	TNFRSF1B	1	tumor necrosis factor receptor superfamily, member 1B [Source:HGNC Symbol;Acc:11917]
ENSG00000028839	-0.000607615	6.961	-0.00427247	0.99668	0.998516	-7.08051	0	0.606675	6.961	4.26586	0.00188665	0.0153591	-1.66566	1	1	TBPL1	6	TBP-like 1 [Source:HGNC Symbol;Acc:11589]
ENSG00000029153	2.2569	7.16541	10.8702	1.2206e-06	0.000172741	6.06164	1	3.10827	7.16541	14.9708	6.97413e-08	2.27525e-05	8.89335	1	2	ARNTL2	12	aryl hydrocarbon receptor nuclear translocator-like 2 [Source:HGNC Symbol;Acc:18984]
ENSG00000029993	0.0295024	4.48168	0.103503	0.919734	0.963823	-7.07464	0	1.28609	4.48168	4.51196	0.00130442	0.0117485	-1.27953	1	1	HMGB3	X	high mobility group box 3 [Source:HGNC Symbol;Acc:5004]
ENSG00000030066	-0.695187	5.36055	-4.37069	0.00161052	0.0151367	-1.38128	1	-0.299641	5.36055	-1.88386	0.090774	0.254685	-5.56134	0	1	NUP160	11	nucleoporin 160kDa [Source:HGNC Symbol;Acc:18017]
ENSG00000030582	-0.373593	10.3785	-2.00327	0.0747399	0.21814	-5.24694	0	-1.75285	10.3785	-9.39906	4.32004e-06	0.000226468	4.72121	1	1	GRN	17	granulin [Source:HGNC Symbol;Acc:4601]
ENSG00000033327	0.599862	5.79027	3.45825	0.00670715	0.0407167	-2.85611	1	0.463101	5.79027	2.66981	0.0246734	0.102753	-4.30207	0	1	GAB2	11	GRB2-associated binding protein 2 [Source:HGNC Symbol;Acc:14458]
ENSG00000033627	-0.747246	5.03242	-4.37233	0.00160655	0.0151351	-1.37872	1	-0.525938	5.03242	-3.07739	0.0125159	0.0622862	-3.61912	0	1	ATP6V0A1	17	ATPase, H+ transporting, lysosomal V0 subunit a1 [Source:HGNC Symbol;Acc:865]
ENSG00000034152	1.46937	8.10623	9.34203	4.55179e-06	0.000393082	4.72755	1	0.282408	8.10623	1.79551	0.104653	0.280493	-5.69265	0	1	MAP2K3	17	mitogen-activated protein kinase kinase 3 [Source:HGNC Symbol;Acc:6843]
ENSG00000034533	-1.23683	6.36506	-7.44929	3.04024e-05	0.00122283	2.76714	1	-0.782287	6.36506	-4.71162	0.000973117	0.00943501	-0.972211	1	2	ASTE1	3	asteroid homolog 1 (Drosophila) [Source:HGNC Symbol;Acc:25021]
ENSG00000034677	0.616337	6.4889	3.4644	0.00664066	0.0404876	-2.8459	1	0.567549	6.4889	3.19016	0.0103911	0.0543528	-3.42979	0	1	RNF19A	8	ring finger protein 19A [Source:HGNC Symbol;Acc:13432]
ENSG00000035115	-0.629586	4.77298	-3.72496	0.00437194	0.0307467	-2.41626	1	-0.595448	4.77298	-3.52298	0.0060409	0.0362422	-2.87378	1	2	SH3YL1	2	SH3 domain containing, Ysc84-like 1 (S. cerevisiae) [Source:HGNC Symbol;Acc:29546]
ENSG00000035141	-0.681813	6.02368	-4.87218	0.000772058	0.00931599	-0.614273	1	-0.519056	6.02368	-3.70913	0.00448337	0.0289529	-2.56593	0	1	FAM136A	2	family with sequence similarity 136, member A [Source:HGNC Symbol;Acc:25911]
ENSG00000035681	0.948266	10.3218	8.73184	8.09784e-06	0.000555096	4.13652	1	1.16145	10.3218	10.6949	1.4078e-06	0.000116438	5.87949	1	2	NSMAF	8	neutral sphingomyelinase (N-SMase) activation associated factor [Source:HGNC Symbol;Acc:8017]
ENSG00000035862	-0.718958	10.5216	-5.91816	0.000187026	0.003755	0.869653	1	-0.821508	10.5216	-6.76231	6.63216e-05	0.00136974	1.85847	1	2	TIMP2	17	TIMP metallopeptidase inhibitor 2 [Source:HGNC Symbol;Acc:11821]
ENSG00000036054	0.0631254	6.93719	0.522833	0.613164	0.788357	-6.93254	0	0.819565	6.93719	6.78801	6.43504e-05	0.00133687	1.89028	1	1	TBC1D23	3	TBC1 domain family, member 23 [Source:HGNC Symbol;Acc:25622]
ENSG00000036549	-1.05618	6.65411	-6.87072	5.84282e-05	0.00175721	2.08635	1	-1.25375	6.65411	-8.15599	1.43768e-05	0.000489895	3.46631	1	2	ZZZ3	1	zinc finger, ZZ-type containing 3 [Source:HGNC Symbol;Acc:24523]
ENSG00000037897	0.15047	6.90092	0.679797	0.512991	0.719902	-6.83277	0	1.24865	6.90092	5.64117	0.000268218	0.00375202	0.384426	1	1	METTL1	12	methyltransferase like 1 [Source:HGNC Symbol;Acc:7030]
ENSG00000038427	2.2677	6.84681	7.55031	2.72289e-05	0.00114759	2.88178	1	4.84045	6.84681	16.1163	3.56634e-08	1.49591e-05	9.54107	1	2	VCAN	5	versican [Source:HGNC Symbol;Acc:2464]
ENSG00000038945	-0.452012	7.48438	-2.01807	0.072951	0.214518	-5.22414	0	-2.26178	7.48438	-10.098	2.32414e-06	0.000157805	5.3633	1	1	MSR1	8	macrophage scavenger receptor 1 [Source:HGNC Symbol;Acc:7376]
ENSG00000039523	-0.0192688	6.12427	-0.108968	0.915514	0.96141	-7.074	0	-1.18427	6.12427	-6.6972	7.16147e-05	0.0014535	1.77751	1	1	FAM65A	16	family with sequence similarity 65, member A [Source:HGNC Symbol;Acc:25836]
ENSG00000039560	0.453726	4.8396	1.87289	0.0923985	0.25109	-5.44479	0	1.29059	4.8396	5.3273	0.00040878	0.0050278	-0.0598087	1	1	RAI14	5	retinoic acid induced 14 [Source:HGNC Symbol;Acc:14873]
ENSG00000040275	-0.418848	6.51517	-4.27548	0.00185933	0.0167893	-1.53075	0	0.678206	6.51517	6.92292	5.49968e-05	0.00120715	2.05584	1	1	CCDC99	5	coiled-coil domain containing 99 [Source:HGNC Symbol;Acc:26010]
ENSG00000040341	0.062532	5.41079	0.354925	0.730463	0.861292	-7.01179	0	0.628498	5.41079	3.56728	0.00562502	0.0342064	-2.80026	1	1	STAU2	8	staufen, RNA binding protein, homolog 2 (Drosophila) [Source:HGNC Symbol;Acc:11371]
ENSG00000040933	-1.44387	6.75882	-7.92179	1.83226e-05	0.00088194	3.29301	1	-0.200656	6.75882	-1.1009	0.298276	0.537238	-6.58969	0	1	INPP4A	2	inositol polyphosphate-4-phosphatase, type I, 107kDa [Source:HGNC Symbol;Acc:6074]
ENSG00000041802	-0.811672	6.60559	-5.45215	0.000345128	0.00561414	0.228107	1	-0.557358	6.60559	-3.74387	0.00424259	0.0279304	-2.50879	0	1	LSG1	3	large subunit GTPase 1 homolog (S. cerevisiae) [Source:HGNC Symbol;Acc:25652]
ENSG00000041982	2.20554	4.84642	9.07491	5.83471e-06	0.000473687	4.47326	1	-0.0300013	4.84642	-0.123444	0.90435	0.957211	-7.20835	0	1	TNC	9	tenascin C [Source:HGNC Symbol;Acc:5318]
ENSG00000042317	-0.655213	4.69558	-3.22935	0.00974296	0.0524097	-3.23735	0	-1.56833	4.69558	-7.72982	2.24449e-05	0.000648223	2.99892	1	1	SPATA7	14	spermatogenesis associated 7 [Source:HGNC Symbol;Acc:20423]
ENSG00000042493	-0.631506	10.8978	-3.47786	0.0064976	0.039944	-2.82358	1	-0.523619	10.8978	-2.8837	0.0172636	0.0792013	-3.94436	0	1	CAPG	2	capping protein (actin filament), gelsolin-like [Source:HGNC Symbol;Acc:1474]
ENSG00000043462	0.680807	9.60687	2.3675	0.0409012	0.144133	-4.66951	0	-0.973736	9.60687	-3.38616	0.00753988	0.0425465	-3.10167	1	1	LCP2	5	lymphocyte cytosolic protein 2 (SH2 domain containing leukocyte protein of 76kDa) [Source:HGNC Symbol;Acc:6529]
ENSG00000043514	-0.623963	4.45064	-4.4712	0.00138582	0.0137621	-1.22479	1	-0.328487	4.45064	-2.35388	0.0418411	0.149942	-4.82277	0	1	TRIT1	1	tRNA isopentenyltransferase 1 [Source:HGNC Symbol;Acc:20286]
ENSG00000044459	-0.654763	4.75489	-4.48791	0.00135183	0.0135621	-1.19891	1	-0.222657	4.75489	-1.52614	0.159822	0.367055	-6.07241	0	1	CNTLN	9	centlein, centrosomal protein [Source:HGNC Symbol;Acc:23432]
ENSG00000047188	-0.67386	6.55222	-4.6867	0.00100905	0.0110894	-0.893879	1	-0.12868	6.55222	-0.894971	0.393096	0.628799	-6.79389	0	1	YTHDC2	5	YTH domain containing 2 [Source:HGNC Symbol;Acc:24721]
ENSG00000047249	-0.306324	8.57818	-2.06262	0.067807	0.204582	-5.1551	0	0.906687	8.57818	6.10515	0.000147481	0.00243607	1.01543	1	1	ATP6V1H	8	ATPase, H+ transporting, lysosomal 50/57kDa, V1 subunit H [Source:HGNC Symbol;Acc:18303]
ENSG00000047579	-0.380665	5.13649	-3.16852	0.010768	0.0562407	-3.33903	0	-0.606685	5.13649	-5.04984	0.00060022	0.00662536	-0.464303	1	1	DTNBP1	6	dystrobrevin binding protein 1 [Source:HGNC Symbol;Acc:17328]
ENSG00000047621	-0.432182	7.10484	-3.20385	0.0101598	0.054058	-3.27996	0	-0.759935	7.10484	-5.63355	0.000270933	0.00377655	0.373807	1	1	C12orf4	12	chromosome 12 open reading frame 4 [Source:HGNC Symbol;Acc:1184]
ENSG00000047634	0.660268	6.67159	3.8406	0.00364111	0.0271343	-2.22749	1	-0.459047	6.67159	-2.67015	0.0246594	0.102725	-4.30151	0	1	SCML1	X	sex comb on midleg-like 1 (Drosophila) [Source:HGNC Symbol;Acc:10580]
ENSG00000047644	-0.552229	7.62911	-4.35033	0.00166057	0.0154841	-1.41314	0	0.904428	7.62911	7.12487	4.36475e-05	0.00102608	2.29933	1	1	WWC3	X	WWC family member 3 [Source:HGNC Symbol;Acc:29237]
ENSG00000047932	-0.613829	7.00162	-6.09969	0.000148496	0.00321942	1.11116	1	-0.5257	7.00162	-5.22395	0.000471052	0.0055485	-0.209183	0	1	GOPC	6	golgi-associated PDZ and coiled-coil motif containing [Source:HGNC Symbol;Acc:17643]
ENSG00000048471	-0.548454	6.3098	-2.8297	0.0188895	0.0837463	-3.90597	0	-1.57637	6.3098	-8.13316	1.47172e-05	0.000496243	3.44178	1	1	SNX29	16	sorting nexin 29 [Source:HGNC Symbol;Acc:30542]
ENSG00000048740	-1.32324	6.45594	-7.1567	4.21039e-05	0.00148945	2.4281	1	-1.26882	6.45594	-6.86237	5.89981e-05	0.00126444	1.98182	1	2	CELF2	10	CUGBP, Elav-like family member 2 [Source:HGNC Symbol;Acc:2550]
ENSG00000048828	-0.648058	9.53164	-8.07064	1.56954e-05	0.000813251	3.45335	1	-0.222747	9.53164	-2.774	0.02073	0.0903292	-4.12814	0	1	FAM120A	9	family with sequence similarity 120A [Source:HGNC Symbol;Acc:13247]
ENSG00000049246	-0.39001	4.01011	-2.14346	0.0593471	0.1866	-5.02844	0	-0.791658	4.01011	-4.35089	0.00165919	0.0139856	-1.53137	1	1	PER3	1	period homolog 3 (Drosophila) [Source:HGNC Symbol;Acc:8847]
ENSG00000049249	0.459474	7.55871	2.17295	0.0565219	0.180422	-4.98182	0	1.55886	7.55871	7.37219	3.30957e-05	0.000849924	2.59065	1	1	TNFRSF9	1	tumor necrosis factor receptor superfamily, member 9 [Source:HGNC Symbol;Acc:11924]
ENSG00000049618	-0.744729	7.10561	-4.73623	0.000938978	0.010543	-0.818742	1	-0.320258	7.10561	-2.03673	0.0707519	0.214903	-5.3277	0	1	ARID1B	6	AT rich interactive domain 1B (SWI1-like) [Source:HGNC Symbol;Acc:18040]
ENSG00000049759	0.861453	4.94312	5.46072	0.000341169	0.00558004	0.240186	1	-0.422568	4.94312	-2.67864	0.0243118	0.101686	-4.28737	0	1	NEDD4L	18	neural precursor cell expressed, developmentally down-regulated 4-like [Source:HGNC Symbol;Acc:7728]
ENSG00000050344	-0.814221	5.09766	-4.1187	0.00236207	0.0198628	-1.77936	1	0.189717	5.09766	0.959677	0.361201	0.600536	-6.73343	0	1	NFE2L3	7	nuclear factor (erythroid-derived 2)-like 3 [Source:HGNC Symbol;Acc:7783]
ENSG00000050393	-0.228569	7.29561	-1.18446	0.265254	0.491686	-6.36258	0	-1.12339	7.29561	-5.82148	0.000211858	0.00316328	0.633254	1	1	CCDC90A	6	coiled-coil domain containing 90A [Source:HGNC Symbol;Acc:21097]
ENSG00000050405	-0.978823	6.21957	-4.46614	0.0013963	0.0138195	-1.23264	1	-0.252298	6.21957	-1.15117	0.278041	0.515172	-6.53483	0	1	LIMA1	12	LIM domain and actin binding 1 [Source:HGNC Symbol;Acc:24636]
ENSG00000050426	-0.588703	5.4983	-3.60684	0.00527897	0.0346755	-2.61035	1	-0.596673	5.4983	-3.65566	0.00488221	0.0308944	-2.65406	1	2	LETMD1	12	LETM1 domain containing 1 [Source:HGNC Symbol;Acc:24241]
ENSG00000050730	2.7924	6.2193	6.52962	8.74703e-05	0.0022908	1.66483	1	1.57499	6.2193	3.68289	0.00467469	0.0299251	-2.60916	1	2	TNIP3	4	TNFAIP3 interacting protein 3 [Source:HGNC Symbol;Acc:19315]
ENSG00000050767	-1.09501	7.81466	-4.15285	0.00224146	0.0191502	-1.72495	1	0.558116	7.81466	2.11666	0.0620324	0.196516	-5.20273	0	1	COL23A1	5	collagen, type XXIII, alpha 1 [Source:HGNC Symbol;Acc:22990]
ENSG00000051108	-0.633708	9.36222	-3.4456	0.00684605	0.0411315	-2.8771	1	-0.858436	9.36222	-4.66749	0.00103772	0.00988188	-1.03967	1	2	HERPUD1	16	homocysteine-inducible, endoplasmic reticulum stress-inducible, ubiquitin-like domain member 1 [Source:HGNC Symbol;Acc:13744]
ENSG00000051128	-0.356793	6.62878	-1.66971	0.12781	0.310699	-5.74051	0	-2.1159	6.62878	-9.90193	2.75531e-06	0.000174606	5.18742	1	1	HOMER3	19	homer homolog 3 (Drosophila) [Source:HGNC Symbol;Acc:17514]
ENSG00000051180	1.76637	5.32066	3.90393	0.00329646	0.0251579	-2.1247	1	3.60121	5.32066	7.95919	1.76202e-05	0.000556894	3.253	1	2	RAD51	15	RAD51 homolog (S. cerevisiae) [Source:HGNC Symbol;Acc:9817]
ENSG00000051620	-0.0958264	6.87406	-0.488252	0.636536	0.80299	-6.95123	0	-1.13936	6.87406	-5.80521	0.000216375	0.00321589	0.610994	1	1	HEBP2	6	heme binding protein 2 [Source:HGNC Symbol;Acc:15716]
ENSG00000052723	-0.774478	5.10017	-4.00564	0.00281296	0.0225973	-1.9605	1	-0.497761	5.10017	-2.57444	0.0289413	0.115562	-4.46051	0	1	SIKE1	1	suppressor of IKBKE 1 [Source:HGNC Symbol;Acc:26119]
ENSG00000052749	0.114204	5.4134	0.63318	0.541682	0.740282	-6.86491	0	1.28396	5.4134	7.11862	4.39576e-05	0.00103116	2.29188	1	1	RRP12	10	ribosomal RNA processing 12 homolog (S. cerevisiae) [Source:HGNC Symbol;Acc:29100]
ENSG00000052802	-0.811174	5.50917	-4.49405	0.00133955	0.0135043	-1.1894	1	-0.40282	5.50917	-2.2317	0.0512763	0.172491	-5.02	0	1	MSMO1	4	methylsterol monooxygenase 1 [Source:HGNC Symbol;Acc:10545]
ENSG00000053254	-0.975161	8.38404	-7.14595	4.26187e-05	0.00149046	2.41543	1	-0.179923	8.38404	-1.31847	0.218501	0.445628	-6.33946	0	1	FOXN3	14	forkhead box N3 [Source:HGNC Symbol;Acc:1928]
ENSG00000053371	-0.59589	7.90035	-3.83224	0.00368937	0.0273666	-2.24109	1	-0.270553	7.90035	-1.73996	0.114359	0.297499	-5.77364	0	1	AKR7A2	1	aldo-keto reductase family 7, member A2 (aflatoxin aldehyde reductase) [Source:HGNC Symbol;Acc:389]
ENSG00000053372	-1.2813	5.96102	-5.21862	0.000474528	0.00676157	-0.105207	1	0.0276482	5.96102	0.112609	0.912704	0.960864	-7.20975	0	1	MRTO4	1	mRNA turnover 4 homolog (S. cerevisiae) [Source:HGNC Symbol;Acc:18477]
ENSG00000053501	0.0814063	7.37612	0.541234	0.60091	0.780235	-6.9221	0	-0.84619	7.37612	-5.62594	0.000273672	0.00379642	0.363197	1	1	USE1	19	unconventional SNARE in the ER 1 homolog (S. cerevisiae) [Source:HGNC Symbol;Acc:30882]
ENSG00000053770	0.177617	7.35511	1.09312	0.301505	0.531162	-6.4629	0	0.60213	7.35511	3.70574	0.0045076	0.0290668	-2.57151	1	1	MUDENG	14	MU-2/AP1M2 domain containing, death-inducing [Source:HGNC Symbol;Acc:20192]
ENSG00000053918	-0.0866872	6.7519	-0.896484	0.392328	0.619212	-6.65705	0	-1.19466	6.7519	-12.3547	3.9291e-07	5.24386e-05	7.17846	1	1	KCNQ1	11	potassium voltage-gated channel, KQT-like subfamily, member 1 [Source:HGNC Symbol;Acc:6294]
ENSG00000054148	-0.162924	8.61708	-1.06493	0.313442	0.543924	-6.49261	0	-1.21593	8.61708	-7.94773	1.78323e-05	0.000557995	3.24044	1	1	PHPT1	9	phosphohistidine phosphatase 1 [Source:HGNC Symbol;Acc:30033]
ENSG00000054277	0.156469	9.60811	1.011	0.337281	0.567514	-6.54775	0	0.615426	9.60811	3.97645	0.00294353	0.0213744	-2.12938	1	1	OPN3	1	opsin 3 [Source:HGNC Symbol;Acc:14007]
ENSG00000054392	0.19741	4.27306	1.33785	0.212344	0.42949	-6.18107	0	0.776113	4.27306	5.25973	0.000448412	0.00536663	-0.1573	1	1	HHAT	1	hedgehog acyltransferase [Source:HGNC Symbol;Acc:18270]
ENSG00000054523	0.820523	6.20398	5.47908	0.000332851	0.00551112	0.266032	1	0.891435	6.20398	5.95259	0.000178959	0.0027967	0.811306	1	2	KIF1B	1	kinesin family member 1B [Source:HGNC Symbol;Acc:16636]
ENSG00000054690	0.103543	3.4769	0.756445	0.467878	0.684773	-6.77548	0	1.20675	3.4769	8.81604	7.46481e-06	0.000317651	4.15175	1	1	PLEKHH1	14	pleckstrin homology domain containing, family H (with MyTH4 domain) member 1 [Source:HGNC Symbol;Acc:17733]
ENSG00000055211	0.368372	8.41847	1.85969	0.09439	0.25463	-5.4645	0	0.864571	8.41847	4.3647	0.00162506	0.0137903	-1.50963	1	1	C6orf72	6	chromosome 6 open reading frame 72 [Source:HGNC Symbol;Acc:21074]
ENSG00000055732	-1.10559	5.06365	-3.86877	0.00348334	0.0262264	-2.18171	1	-0.694831	5.06365	-2.43141	0.0367614	0.137132	-4.69622	0	1	MCOLN3	1	mucolipin 3 [Source:HGNC Symbol;Acc:13358]
ENSG00000056558	2.33956	5.05386	6.11102	0.000146396	0.00318011	1.12607	1	0.539152	5.05386	1.40829	0.191184	0.411188	-6.22707	0	1	RC3H2	9	ring finger and CCCH-type domains 2 [Source:HGNC Symbol;Acc:21461]
ENSG00000056972	1.87956	5.25968	10.9499	1.14475e-06	0.000169471	6.12599	1	2.05295	5.25968	11.96	5.24647e-07	6.41854e-05	6.88628	1	2	GYG2	X	glycogenin 2 [Source:HGNC Symbol;Acc:4700]
ENSG00000057704	1.018	4.68499	3.42969	0.00702498	0.0418105	-2.90352	1	1.59113	4.68499	5.36056	0.000390676	0.00490558	-0.0120721	1	2	PITHD1	1	PITH (C-terminal proteasome-interacting domain of thioredoxin-like) domain containing 1 [Source:HGNC Symbol;Acc:25022]
ENSG00000057757	-0.504524	8.90943	-3.81037	0.00381887	0.0281349	-2.27672	0	-1.67673	8.90943	-12.6633	3.15203e-07	4.50115e-05	7.40021	1	1	MTA3	2	metastasis associated 1 family, member 3 [Source:HGNC Symbol;Acc:23784]
ENSG00000057935	-0.550296	4.09169	-2.36372	0.0411601	0.144705	-4.67565	0	-0.873718	4.09169	-3.75293	0.00418207	0.0276965	-2.49392	1	1	USP13	3	ubiquitin specific peptidase 13 (isopeptidase T-3) [Source:HGNC Symbol;Acc:12611]
ENSG00000058056	0.734671	6.06328	3.3937	0.0074479	0.0436783	-2.96333	1	1.90043	6.06328	8.77876	7.73812e-06	0.000326544	4.11422	1	2	ATP11B	3	ATPase, class VI, type 11B [Source:HGNC Symbol;Acc:13553]
ENSG00000058262	0.310243	7.05854	1.96157	0.0800083	0.22826	-5.31083	0	0.64592	7.05854	4.08396	0.00249188	0.0188734	-1.95597	1	1	PPP1R12A	12	protein phosphatase 1, regulatory subunit 12A [Source:HGNC Symbol;Acc:7618]
ENSG00000058600	-0.75439	6.72717	-4.10411	0.00241572	0.0202128	-1.80266	1	-0.187907	6.72717	-1.02227	0.332187	0.572169	-6.67166	0	1	ATP2B4	1	ATPase, Ca++ transporting, plasma membrane 4 [Source:HGNC Symbol;Acc:817]
ENSG00000058804	-0.502174	5.89403	-3.05234	0.0130458	0.0647585	-3.53347	0	-0.665184	5.89403	-4.04316	0.00265401	0.0196866	-2.02163	1	1	DGKG	3	diacylglycerol kinase, gamma 90kDa [Source:HGNC Symbol;Acc:2853]
ENSG00000059588	-1.07492	7.33301	-5.40631	0.000367163	0.0058273	0.163307	1	0.193157	7.33301	0.971479	0.355593	0.594578	-6.72203	0	1	PET112	4	PET112 homolog (yeast) [Source:HGNC Symbol;Acc:8849]
ENSG00000059728	1.4111	8.67087	11.7895	5.95984e-07	0.00011631	6.77658	1	1.78241	8.67087	14.8917	7.3174e-08	2.30198e-05	8.84653	1	2	CDK17	12	cyclin-dependent kinase 17 [Source:HGNC Symbol;Acc:8750]
ENSG00000060138	0.697347	11.1059	6.30355	0.000115198	0.00270507	1.37686	1	0.640369	11.1059	5.78851	0.000221122	0.00327078	0.588102	1	2	STYK1	12	serine/threonine/tyrosine kinase 1 [Source:HGNC Symbol;Acc:18889]
ENSG00000060558	0.816512	6.76167	7.02424	4.89463e-05	0.001588	2.2711	1	1.1568	6.76167	9.95166	2.63823e-06	0.000170248	5.23233	1	2	CREB3L3	19	cAMP responsive element binding protein 3-like 3 [Source:HGNC Symbol;Acc:18855]
ENSG00000060749	-0.739115	5.42149	-5.13633	0.000531857	0.00725211	-0.224554	1	-0.620747	5.42149	-4.31376	0.00175471	0.0145335	-1.58989	1	2	BRP44L	6	brain protein 44-like [Source:HGNC Symbol;Acc:21606]
ENSG00000060982	1.58191	7.0754	4.79093	0.000867586	0.00997005	-0.736156	1	1.28884	7.0754	3.90334	0.00329951	0.0232405	-2.24806	1	2	HDAC7	12	histone deacetylase 7 [Source:HGNC Symbol;Acc:14067]
ENSG00000061676	0.444175	4.13395	2.89802	0.0168567	0.0772521	-3.79177	0	0.94761	4.13395	6.18269	0.000133826	0.0022713	1.11796	1	1	MRPS35	12	mitochondrial ribosomal protein S35 [Source:HGNC Symbol;Acc:16635]
ENSG00000061794	-0.951009	7.89295	-5.72834	0.000239177	0.00443802	0.61211	1	-0.556944	7.89295	-3.35471	0.00793607	0.0442716	-3.1542	0	1	GUCY1B3	4	guanylate cyclase 1, soluble, beta 3 [Source:HGNC Symbol;Acc:4687]
ENSG00000062282	1.58446	4.83146	10.0178	2.49078e-06	0.000266212	5.34177	1	1.21679	4.83146	7.69322	2.33404e-05	0.000665352	2.95782	1	2	ZFP112	19	zinc finger protein 285 [Source:HGNC Symbol;Acc:13079]
ENSG00000062822	-0.972509	5.89377	-4.32444	0.00172665	0.0158843	-1.45374	1	-0.028324	5.89377	-0.125948	0.902421	0.956382	-7.20801	0	1	POLD1	19	polymerase (DNA directed), delta 1, catalytic subunit 125kDa [Source:HGNC Symbol;Acc:9175]
ENSG00000063177	-0.478641	11.4486	-3.72696	0.00435805	0.0307107	-2.41298	0	-0.829373	11.4486	-6.45795	9.53831e-05	0.00179526	1.47524	1	1	RPL18	19	ribosomal protein L18 [Source:HGNC Symbol;Acc:10310]
ENSG00000063241	-0.715177	4.96524	-4.68895	0.00100574	0.0110673	-0.890455	1	-0.880525	4.96524	-5.77304	0.00022562	0.00330813	0.566857	1	2	ISOC2	19	isochorismatase domain containing 2 [Source:HGNC Symbol;Acc:26278]
ENSG00000063438	-0.279907	6.96691	-2.07784	0.0661301	0.201219	-5.13138	0	0.670492	6.96691	4.9773	0.000664838	0.00714174	-0.571875	1	1	AHRR	5	aryl-hydrocarbon receptor repressor [Source:HGNC Symbol;Acc:346]
ENSG00000063601	-0.57426	6.14812	-3.44958	0.00680201	0.0410438	-2.87049	0	-1.01796	6.14812	-6.11489	0.000145686	0.00241671	1.02836	1	1	MTMR1	X	myotubularin related protein 1 [Source:HGNC Symbol;Acc:7449]
ENSG00000064012	-0.940163	5.04937	-6.94392	5.36792e-05	0.00168336	2.17481	1	-0.38931	5.04937	-2.87539	0.0175042	0.080055	-3.9583	0	1	CASP8	2	caspase 8, apoptosis-related cysteine peptidase [Source:HGNC Symbol;Acc:1509]
ENSG00000064115	-0.861182	6.92096	-4.63511	0.00108801	0.0116486	-0.972513	1	-0.757335	6.92096	-4.07618	0.00252196	0.0190357	-1.96847	1	2	TM7SF3	12	transmembrane 7 superfamily member 3 [Source:HGNC Symbol;Acc:23049]
ENSG00000064201	-0.518017	4.48656	-2.35398	0.0418343	0.146403	-4.69146	0	1.13115	4.48656	5.14016	0.000529027	0.0060167	-0.331409	1	1	TSPAN32	11	tetraspanin 32 [Source:HGNC Symbol;Acc:13410]
ENSG00000064225	-0.611183	7.12903	-5.26341	0.00044615	0.00653075	-0.0406667	1	-0.772875	7.12903	-6.65588	7.52109e-05	0.0015091	1.72585	1	2	ST3GAL6	3	ST3 beta-galactoside alpha-2,3-sialyltransferase 6 [Source:HGNC Symbol;Acc:18080]
ENSG00000064393	0.591084	7.60257	3.59114	0.00541352	0.03527	-2.63623	1	1.77609	7.60257	10.7907	1.30191e-06	0.000111338	5.95974	1	2	HIPK2	7	homeodomain interacting protein kinase 2 [Source:HGNC Symbol;Acc:14402]
ENSG00000064601	-0.342234	10.0904	-1.9018	0.0881739	0.243359	-5.40142	0	-1.25733	10.0904	-6.98703	5.10797e-05	0.00114926	2.13369	1	1	CTSA	20	cathepsin A [Source:HGNC Symbol;Acc:9251]
ENSG00000064651	0.540485	5.39801	2.21936	0.0523371	0.171082	-4.90803	0	0.94273	5.39801	3.87108	0.00347077	0.0241018	-2.3006	1	1	SLC12A2	5	solute carrier family 12 (sodium/potassium/chloride transporters), member 2 [Source:HGNC Symbol;Acc:10911]
ENSG00000064652	-0.899826	6.35191	-4.98926	0.000653685	0.00836576	-0.440289	1	-1.10483	6.35191	-6.12596	0.000143674	0.00239313	1.04303	1	2	SNX24	5	sorting nexin 24 [Source:HGNC Symbol;Acc:21533]
ENSG00000064886	1.39819	5.21319	4.94099	0.000699949	0.00870219	-0.511785	1	1.79273	5.21319	6.33522	0.000110796	0.00198555	1.31721	1	2	CHI3L2	1	chitinase 3-like 2 [Source:HGNC Symbol;Acc:1933]
ENSG00000064989	0.0930866	3.83897	0.648926	0.531887	0.734116	-6.85429	0	0.672735	3.83897	4.68977	0.00100455	0.0096643	-1.00558	1	1	CALCRL	2	calcitonin receptor-like [Source:HGNC Symbol;Acc:16709]
ENSG00000065057	-0.967959	4.1101	-4.13326	0.00230982	0.0195447	-1.75614	1	-1.0642	4.1101	-4.5442	0.00124367	0.0113346	-1.22954	1	2	NTHL1	16	nth endonuclease III-like 1 (E. coli) [Source:HGNC Symbol;Acc:8028]
ENSG00000065060	-0.889737	8.02343	-7.05826	4.70803e-05	0.00154952	2.31164	1	0.186201	8.02343	1.47713	0.172274	0.38459	-6.13767	0	1	UHRF1BP1	6	UHRF1 binding protein 1 [Source:HGNC Symbol;Acc:21216]
ENSG00000065150	-0.116241	7.7373	-0.760078	0.465805	0.682855	-6.77263	0	-0.839369	7.7373	-5.48849	0.000328672	0.00432428	0.170091	1	1	IPO5	13	importin 5 [Source:HGNC Symbol;Acc:6402]
ENSG00000065183	-0.845128	3.97461	-4.88655	0.000756363	0.00920272	-0.592808	1	-0.326519	3.97461	-1.88794	0.090177	0.253486	-5.55521	0	1	WDR3	1	WD repeat domain 3 [Source:HGNC Symbol;Acc:12755]
ENSG00000065243	-0.530443	7.32261	-3.44974	0.00680021	0.0410438	-2.87022	0	-0.635293	7.32261	-4.13163	0.00231562	0.0178748	-1.8795	1	1	PKN2	1	protein kinase N2 [Source:HGNC Symbol;Acc:9406]
ENSG00000065268	-0.695315	6.05555	-4.36548	0.00162317	0.0152103	-1.38943	1	-0.790751	6.05555	-4.96467	0.000676832	0.00723967	-0.59068	1	2	WDR18	19	WD repeat domain 18 [Source:HGNC Symbol;Acc:17956]
ENSG00000065308	-0.406658	4.96429	-2.75258	0.021485	0.0915361	-4.03465	0	-1.1129	4.96429	-7.53298	2.77467e-05	0.000749714	2.77607	1	1	TRAM2	6	translocation associated membrane protein 2 [Source:HGNC Symbol;Acc:16855]
ENSG00000065485	0.023685	5.12458	0.121092	0.906162	0.956779	-7.07247	0	-1.33167	5.12458	-6.80833	6.28372e-05	0.00132575	1.91537	1	1	PDIA5	3	protein disulfide isomerase family A, member 5 [Source:HGNC Symbol;Acc:24811]
ENSG00000065534	0.385112	3.50514	3.07097	0.0126496	0.0633452	-3.50228	0	0.676133	3.50514	5.39164	0.000374532	0.00475027	0.0324032	1	1	MYLK	3	myosin light chain kinase [Source:HGNC Symbol;Acc:7590]
ENSG00000065559	0.324596	5.32265	2.00542	0.0744771	0.217596	-5.24363	0	0.695732	5.32265	4.29838	0.00179597	0.0148056	-1.61419	1	1	MAP2K4	17	mitogen-activated protein kinase kinase 4 [Source:HGNC Symbol;Acc:6844]
ENSG00000065809	0.549028	7.90961	3.29242	0.00878608	0.0489205	-3.13206	0	0.757002	7.90961	4.5396	0.00125215	0.0114001	-1.23667	1	1	FAM107B	10	family with sequence similarity 107, member B [Source:HGNC Symbol;Acc:23726]
ENSG00000065833	0.0815906	9.55307	0.514109	0.619019	0.79213	-6.93736	0	-0.818307	9.55307	-5.15622	0.00051735	0.00593032	-0.30791	1	1	ME1	6	malic enzyme 1, NADP(+)-dependent, cytosolic [Source:HGNC Symbol;Acc:6983]
ENSG00000065911	0.122412	9.68727	0.887586	0.39686	0.623406	-6.66509	0	0.687306	9.68727	4.98351	0.000659021	0.0071009	-0.562631	1	1	MTHFD2	2	methylenetetrahydrofolate dehydrogenase (NADP+ dependent) 2, methenyltetrahydrofolate cyclohydrolase [Source:HGNC Symbol;Acc:7434]
ENSG00000065989	0.333042	4.02035	3.31952	0.00840523	0.0474447	-3.08686	0	0.662781	4.02035	6.60613	7.98033e-05	0.00156733	1.66334	1	1	PDE4A	19	phosphodiesterase 4A, cAMP-specific [Source:HGNC Symbol;Acc:8780]
ENSG00000066294	-0.874379	6.92159	-4.94613	0.000694855	0.00866236	-0.504149	1	-0.00500426	6.92159	-0.0283078	0.978007	0.990938	-7.21628	0	1	CD84	1	CD84 molecule [Source:HGNC Symbol;Acc:1704]
ENSG00000066322	-0.765869	8.33344	-5.233	0.000465214	0.00668338	-0.0844615	1	0.0472263	8.33344	0.322686	0.75398	0.878161	-7.15976	0	1	ELOVL1	1	ELOVL fatty acid elongase 1 [Source:HGNC Symbol;Acc:14418]
ENSG00000066379	0.253994	8.47269	2.42178	0.0373576	0.135809	-4.58113	0	0.697708	8.47269	6.6525	7.55137e-05	0.00151345	1.72161	1	1	ZNRD1	6	zinc ribbon domain containing 1 [Source:HGNC Symbol;Acc:13182]
ENSG00000066382	-0.0376093	3.19741	-0.319862	0.756054	0.875528	-7.02463	0	-0.643521	3.19741	-5.47305	0.000335557	0.00437586	0.148234	1	1	MPPED2	11	metallophosphoesterase domain containing 2 [Source:HGNC Symbol;Acc:1180]
ENSG00000066427	-0.639941	6.71278	-6.14204	0.000140805	0.00308911	1.16683	1	-0.346161	6.71278	-3.32239	0.00836588	0.046028	-3.20824	0	1	ATXN3	14	ataxin 3 [Source:HGNC Symbol;Acc:7106]
ENSG00000066651	-0.930196	6.53592	-7.5527	2.71583e-05	0.00114759	2.88448	1	-0.0177923	6.53592	-0.144464	0.888178	0.948909	-7.20526	0	1	TRMT11	6	tRNA methyltransferase 11 homolog (S. cerevisiae) [Source:HGNC Symbol;Acc:21080]
ENSG00000066654	-0.533159	9.14907	-4.9764	0.000665685	0.00844303	-0.459309	0	-0.637096	9.14907	-5.94653	0.000180352	0.00280429	0.803125	1	1	THUMPD1	16	THUMP domain containing 1 [Source:HGNC Symbol;Acc:23807]
ENSG00000066926	-0.541786	5.26136	-4.60316	0.0011402	0.0120425	-1.02139	0	-1.02747	5.26136	-8.72968	8.11485e-06	0.000334799	4.0646	1	1	FECH	18	ferrochelatase [Source:HGNC Symbol;Acc:3647]
ENSG00000067057	1.32101	7.21039	11.8638	5.63665e-07	0.000112793	6.83178	1	-1.22501	7.21039	-11.0017	1.09821e-06	0.000100175	6.13407	1	2	PFKP	10	phosphofructokinase, platelet [Source:HGNC Symbol;Acc:8878]
ENSG00000067066	-0.703552	7.46335	-3.41524	0.0071917	0.0425298	-2.92752	1	-0.351645	7.46335	-1.70698	0.120503	0.307312	-5.8211	0	1	SP100	2	SP100 nuclear antigen [Source:HGNC Symbol;Acc:11206]
ENSG00000067113	1.46907	6.14336	5.67722	0.000255773	0.00463098	0.541858	1	2.42622	6.14336	9.37615	4.41155e-06	0.000227969	4.69944	1	2	PPAP2A	5	phosphatidic acid phosphatase type 2A [Source:HGNC Symbol;Acc:9228]
ENSG00000067715	1.12982	4.72915	4.17224	0.00217586	0.0187443	-1.69411	1	1.71533	4.72915	6.33444	0.000110903	0.00198555	1.31619	1	2	SYT1	12	synaptotagmin I [Source:HGNC Symbol;Acc:11509]
ENSG00000067836	0.158403	5.28786	0.735876	0.479728	0.693759	-6.79139	0	2.20611	5.28786	10.2487	2.04306e-06	0.000148729	5.4963	1	1	ROGDI	16	rogdi homolog (Drosophila) [Source:HGNC Symbol;Acc:29478]
ENSG00000067992	2.37247	6.04908	8.96859	6.4515e-06	0.000494942	4.37015	1	-1.42694	6.04908	-5.39422	0.000373222	0.0047439	0.0360962	1	2	PDK3	X	pyruvate dehydrogenase kinase, isozyme 3 [Source:HGNC Symbol;Acc:8811]
ENSG00000068001	-0.454814	6.41093	-2.79408	0.0200466	0.087373	-3.96545	0	0.708969	6.41093	4.35543	0.00164788	0.0139169	-1.52421	1	1	HYAL2	3	hyaluronoglucosaminidase 2 [Source:HGNC Symbol;Acc:5321]
ENSG00000068305	-0.501979	7.98687	-3.04302	0.0132488	0.0654326	-3.54908	0	-1.43798	7.98687	-8.71711	8.21445e-06	0.000338117	4.05186	1	1	MEF2A	15	myocyte enhancer factor 2A [Source:HGNC Symbol;Acc:6993]
ENSG00000068366	0.79332	5.90289	4.22892	0.00199559	0.0176665	-1.60426	1	1.12826	5.90289	6.01437	0.000165413	0.00264699	0.894359	1	2	ACSL4	X	acyl-CoA synthetase long-chain family member 4 [Source:HGNC Symbol;Acc:3571]
ENSG00000068438	-0.628178	7.7418	-6.1409	0.000141007	0.00308969	1.16533	1	-0.472824	7.7418	-4.6222	0.0011088	0.0103629	-1.10918	0	1	FTSJ1	X	FtsJ homolog 1 (E. coli) [Source:HGNC Symbol;Acc:13254]
ENSG00000068654	-0.681522	3.48346	-4.41869	0.00149872	0.0145349	-1.30637	1	-0.0661162	3.48346	-0.428669	0.6778	0.834788	-7.11661	0	1	POLR1A	2	polymerase (RNA) I polypeptide A, 194kDa [Source:HGNC Symbol;Acc:17264]
ENSG00000068724	-1.54732	6.13224	-7.24425	3.8157e-05	0.00139811	2.53065	1	-1.38479	6.13224	-6.48333	9.24953e-05	0.00175403	1.50767	1	2	TTC7A	2	tetratricopeptide repeat domain 7A [Source:HGNC Symbol;Acc:19750]
ENSG00000068793	-0.638121	8.91971	-6.20226	0.0001306	0.00293841	1.24557	1	-0.683655	8.91971	-6.64484	7.62049e-05	0.00152384	1.712	1	2	CYFIP1	15	cytoplasmic FMR1 interacting protein 1 [Source:HGNC Symbol;Acc:13759]
ENSG00000068971	0.803157	6.53455	4.65662	0.00105432	0.011395	-0.939685	1	1.28107	6.53455	7.42751	3.11383e-05	0.000817531	2.65479	1	2	PPP2R5B	11	protein phosphatase 2, regulatory subunit B', beta [Source:HGNC Symbol;Acc:9310]
ENSG00000069248	-0.744878	6.51391	-4.05147	0.00262009	0.021429	-1.88689	1	-0.339076	6.51391	-1.84427	0.0967671	0.266034	-5.62054	0	1	NUP133	1	nucleoporin 133kDa [Source:HGNC Symbol;Acc:18016]
ENSG00000069329	-0.644608	8.57751	-5.16787	0.000509049	0.00704472	-0.178694	1	0.0156905	8.57751	0.125792	0.902541	0.956395	-7.20803	0	1	VPS35	16	vacuolar protein sorting 35 homolog (S. cerevisiae) [Source:HGNC Symbol;Acc:13487]
ENSG00000069482	1.50278	5.21868	4.05677	0.00259873	0.0213734	-1.8784	1	0.542343	5.21868	1.46406	0.175734	0.389815	-6.15485	0	1	GAL	11	galanin prepropeptide [Source:HGNC Symbol;Acc:4114]
ENSG00000069493	-0.817074	5.62923	-5.27115	0.000441431	0.00649269	-0.0295384	1	-1.20391	5.62923	-7.76673	2.15796e-05	0.000633536	3.04021	1	2	CLEC2D	12	C-type lectin domain family 2, member D [Source:HGNC Symbol;Acc:14351]
ENSG00000069535	0.651157	3.63164	4.06517	0.00256521	0.0211471	-1.86494	1	1.16016	3.63164	7.24289	3.82151e-05	0.00093896	2.43928	1	2	MAOB	X	monoamine oxidase B [Source:HGNC Symbol;Acc:6834]
ENSG00000069712	-0.601859	4.27396	-4.38614	0.00157359	0.0149606	-1.35714	1	0.69195	4.27396	5.04269	0.000606274	0.00667545	-0.474863	1	2	KIAA1107	1	KIAA1107 [Source:HGNC Symbol;Acc:29192]
ENSG00000069812	0.214143	3.59267	1.23557	0.246544	0.470622	-6.30385	0	0.674945	3.59267	3.89432	0.00334647	0.0235067	-2.26273	1	1	HES2	1	hairy and enhancer of split 2 (Drosophila) [Source:HGNC Symbol;Acc:16005]
ENSG00000069849	0.432984	8.93624	2.65992	0.0250852	0.101967	-4.18879	0	0.70881	8.93624	4.35437	0.00165051	0.0139258	-1.52588	1	1	ATP1B3	3	ATPase, Na+/K+ transporting, beta 3 polypeptide [Source:HGNC Symbol;Acc:806]
ENSG00000069943	-1.08685	6.48156	-5.06304	0.000589202	0.00782214	-0.331673	1	-0.674007	6.48156	-3.13983	0.0112895	0.0579736	-3.51427	0	1	PIGB	15	phosphatidylinositol glycan anchor biosynthesis, class B [Source:HGNC Symbol;Acc:8959]
ENSG00000069974	0.166513	7.20335	0.815469	0.434937	0.658273	-6.72768	0	0.787039	7.20335	3.85439	0.00356299	0.0245254	-2.32782	1	1	RAB27A	15	RAB27A, member RAS oncogene family [Source:HGNC Symbol;Acc:9766]
ENSG00000069998	1.16043	8.38812	9.22615	5.06581e-06	0.000423612	4.61807	1	1.27462	8.38812	10.134	2.25339e-06	0.000156909	5.39521	1	2	CECR5	22	cat eye syndrome chromosome region, candidate 5 [Source:HGNC Symbol;Acc:1843]
ENSG00000070501	-1.21171	7.94488	-7.67981	2.36781e-05	0.00104545	3.02696	1	-0.907352	7.94488	-5.7508	0.000232258	0.00337068	0.536269	1	2	POLB	8	polymerase (DNA directed), beta [Source:HGNC Symbol;Acc:9174]
ENSG00000070614	0.183313	4.69271	1.21608	0.253547	0.478083	-6.32645	0	0.944311	4.69271	6.26449	0.000120891	0.00211284	1.22521	1	1	NDST1	5	N-deacetylase/N-sulfotransferase (heparan glucosaminyl) 1 [Source:HGNC Symbol;Acc:7680]
ENSG00000070731	1.61887	5.14827	7.46261	2.99617e-05	0.00121366	2.78233	1	2.83176	5.14827	13.0538	2.40145e-07	3.89222e-05	7.67272	1	2	ST6GALNAC2	17	ST6 (alpha-N-acetyl-neuraminyl-2,3-beta-galactosyl-1,3)-N-acetylgalactosaminide alpha-2,6-sialyltransferase 2 [Source:HGNC Symbol;Acc:10867]
ENSG00000070759	-0.186722	4.14218	-1.00108	0.341809	0.572346	-6.55764	0	-0.876787	4.14218	-4.70074	0.000988635	0.00955355	-0.988818	1	1	TESK2	1	testis-specific kinase 2 [Source:HGNC Symbol;Acc:11732]
ENSG00000070785	-0.757522	7.6844	-6.37395	0.000105659	0.00256037	1.46729	1	-0.266492	7.6844	-2.24232	0.0503796	0.170443	-5.00297	0	1	EIF2B3	1	eukaryotic translation initiation factor 2B, subunit 3 gamma, 58kDa [Source:HGNC Symbol;Acc:3259]
ENSG00000070882	-0.263506	6.62586	-2.36489	0.0410795	0.144537	-4.67375	0	-0.850391	6.62586	-7.63203	2.49255e-05	0.000699225	2.88878	1	1	OSBPL3	7	oxysterol binding protein-like 3 [Source:HGNC Symbol;Acc:16370]
ENSG00000070961	1.2482	9.04858	6.12644	0.000143587	0.00313455	1.14635	1	0.561109	9.04858	2.75406	0.0214323	0.0925876	-4.16149	0	1	ATP2B1	12	ATPase, Ca++ transporting, plasma membrane 1 [Source:HGNC Symbol;Acc:814]
ENSG00000071073	-1.38678	6.98887	-6.90663	5.60437e-05	0.0017097	2.12983	1	-0.627241	6.98887	-3.12388	0.0115906	0.0591118	-3.54105	0	1	MGAT4A	2	mannosyl (alpha-1,3-)-glycoprotein beta-1,4-N-acetylglucosaminyltransferase, isozyme A [Source:HGNC Symbol;Acc:7047]
ENSG00000071242	-0.504046	6.22837	-2.86784	0.0177257	0.0799473	-3.84224	0	-1.76812	6.22837	-10.06	2.40162e-06	0.000161486	5.32944	1	1	RPS6KA2	6	ribosomal protein S6 kinase, 90kDa, polypeptide 2 [Source:HGNC Symbol;Acc:10431]
ENSG00000071246	-0.765191	5.52821	-5.05336	0.000597257	0.00787565	-0.345875	1	0.154307	5.52821	1.01905	0.333635	0.573766	-6.67491	0	1	VASH1	14	vasohibin 1 [Source:HGNC Symbol;Acc:19964]
ENSG00000071794	-0.824908	4.18053	-6.09523	0.000149334	0.00322404	1.10527	1	-1.18508	4.18053	-8.75651	7.90648e-06	0.000329685	4.09175	1	2	HLTF	3	helicase-like transcription factor [Source:HGNC Symbol;Acc:11099]
ENSG00000071859	-0.549084	9.41737	-4.94887	0.000692164	0.0086535	-0.500092	0	-0.799801	9.41737	-7.20857	3.97147e-05	0.000966556	2.39876	1	1	FAM50A	X	family with sequence similarity 50, member A [Source:HGNC Symbol;Acc:18786]
ENSG00000071967	-0.371262	6.11159	-1.10647	0.295977	0.525257	-6.44862	0	-1.61963	6.11159	-4.82699	0.000823711	0.00834463	-0.797146	1	1	CYBRD1	2	cytochrome b reductase 1 [Source:HGNC Symbol;Acc:20797]
ENSG00000072121	-0.546689	6.82555	-3.52432	0.00602789	0.037994	-2.74663	0	-0.768913	6.82555	-4.95692	0.000684298	0.00727536	-0.602219	1	1	ZFYVE26	14	zinc finger, FYVE domain containing 26 [Source:HGNC Symbol;Acc:20761]
ENSG00000072210	-0.787125	7.73192	-5.61608	0.000277268	0.00486195	0.457352	1	-1.48108	7.73192	-10.5674	1.56374e-06	0.00012443	5.77157	1	2	ALDH3A2	17	aldehyde dehydrogenase 3 family, member A2 [Source:HGNC Symbol;Acc:403]
ENSG00000072274	0.780769	10.6675	3.46879	0.00659368	0.0403057	-2.83863	1	0.313588	10.6675	1.39321	0.195557	0.417287	-6.24628	0	1	TFRC	3	transferrin receptor (p90, CD71) [Source:HGNC Symbol;Acc:11763]
ENSG00000072364	0.593535	4.55274	4.93835	0.000702579	0.00872872	-0.515705	1	0.208567	4.55274	1.73533	0.115204	0.298921	-5.78033	0	1	AFF4	5	AF4/FMR2 family, member 4 [Source:HGNC Symbol;Acc:17869]
ENSG00000072401	0.467305	10.827	5.05767	0.000593658	0.0078453	-0.339553	0	0.991467	10.827	10.7307	1.36715e-06	0.000114387	5.90957	1	1	UBE2D1	10	ubiquitin-conjugating enzyme E2D 1 [Source:HGNC Symbol;Acc:12474]
ENSG00000072682	3.19428	7.71931	8.53577	9.81182e-06	0.000617216	3.93875	1	2.14476	7.71931	5.73124	0.000238273	0.00343226	0.509296	1	2	P4HA2	5	prolyl 4-hydroxylase, alpha polypeptide II [Source:HGNC Symbol;Acc:8547]
ENSG00000072736	-1.12151	7.21089	-7.69848	2.32093e-05	0.00103252	3.04772	1	-0.607173	7.21089	-4.16786	0.00219051	0.0170828	-1.82157	1	2	NFATC3	16	nuclear factor of activated T-cells, cytoplasmic, calcineurin-dependent 3 [Source:HGNC Symbol;Acc:7777]
ENSG00000072818	-1.11787	4.97385	-4.74794	0.000923178	0.0104455	-0.80102	1	-1.09945	4.97385	-4.66972	0.00103434	0.00986306	-1.03625	1	2	ACAP1	17	ArfGAP with coiled-coil, ankyrin repeat and PH domains 1 [Source:HGNC Symbol;Acc:16467]
ENSG00000073060	-0.358092	4.05915	-2.0256	0.0720557	0.212952	-5.21251	0	-0.980284	4.05915	-5.54512	0.000304689	0.0041069	0.249976	1	1	SCARB1	12	scavenger receptor class B, member 1 [Source:HGNC Symbol;Acc:1664]
ENSG00000073111	-0.614522	4.54749	-3.15137	0.0110766	0.0572922	-3.36772	0	-0.708619	4.54749	-3.63392	0.00505491	0.0316125	-2.68997	1	1	MCM2	3	minichromosome maintenance complex component 2 [Source:HGNC Symbol;Acc:6944]
ENSG00000073350	-0.698208	4.93345	-3.52849	0.00598752	0.0378474	-2.73973	1	-0.497645	4.93345	-2.51492	0.0319716	0.124172	-4.55892	0	1	LLGL2	17	lethal giant larvae homolog 2 (Drosophila) [Source:HGNC Symbol;Acc:6629]
ENSG00000073417	1.1117	7.4701	6.15398	0.000138715	0.0030585	1.18248	1	0.409439	7.4701	2.26652	0.0483938	0.165544	-4.96409	0	1	PDE8A	15	phosphodiesterase 8A [Source:HGNC Symbol;Acc:8793]
ENSG00000073605	-1.00152	5.48266	-4.24977	0.00193329	0.0172975	-1.5713	1	-0.121342	5.48266	-0.51489	0.618493	0.799102	-7.0729	0	1	GSDMB	17	gasdermin B [Source:HGNC Symbol;Acc:23690]
ENSG00000073712	3.00226	4.34907	15.9299	3.96518e-08	2.48272e-05	9.37625	1	0.526366	4.34907	2.79289	0.0200865	0.0883554	-4.09654	0	1	FERMT2	14	fermitin family member 2 [Source:HGNC Symbol;Acc:15767]
ENSG00000073737	-1.4326	7.77712	-4.84867	0.000798478	0.00948332	-0.649434	1	-4.89891	7.77712	-16.5805	2.75213e-08	1.2759e-05	9.7883	1	2	DHRS9	2	dehydrogenase/reductase (SDR family) member 9 [Source:HGNC Symbol;Acc:16888]
ENSG00000073756	5.72038	6.91167	19.7772	5.45589e-09	9.61165e-06	11.1383	1	2.14398	6.91167	7.41244	3.16587e-05	0.000826268	2.63735	1	2	PTGS2	1	prostaglandin-endoperoxide synthase 2 (prostaglandin G/H synthase and cyclooxygenase) [Source:HGNC Symbol;Acc:9605]
ENSG00000073792	1.25323	7.1619	5.54049	0.000306577	0.00518327	0.35213	1	0.312249	7.1619	1.38044	0.199323	0.422255	-6.26244	0	1	IGF2BP2	3	insulin-like growth factor 2 mRNA binding protein 2 [Source:HGNC Symbol;Acc:28867]
ENSG00000073849	-0.705165	6.14177	-2.94696	0.0155386	0.0729204	-3.70989	0	-1.18043	6.14177	-4.93314	0.000707797	0.00746662	-0.637725	1	1	ST6GAL1	3	ST6 beta-galactosamide alpha-2,6-sialyltranferase 1 [Source:HGNC Symbol;Acc:10860]
ENSG00000073910	-0.836858	5.30316	-4.05359	0.00261152	0.0213986	-1.8835	1	0.776776	5.30316	3.76257	0.0041187	0.0273705	-2.4781	1	2	FRY	13	furry homolog (Drosophila) [Source:HGNC Symbol;Acc:20367]
ENSG00000073921	0.160891	8.68352	1.55059	0.153914	0.351004	-5.90539	0	0.965493	8.68352	9.30494	4.7098e-06	0.000233674	4.63145	1	1	PICALM	11	phosphatidylinositol binding clathrin assembly protein [Source:HGNC Symbol;Acc:15514]
ENSG00000073969	0.193882	5.31326	1.42571	0.186235	0.396739	-6.07035	0	0.832765	5.31326	6.12373	0.000144076	0.00239677	1.04009	1	1	NSF	17	N-ethylmaleimide-sensitive factor [Source:HGNC Symbol;Acc:8016]
ENSG00000074071	-0.720846	7.94853	-5.19873	0.000487748	0.00686863	-0.133964	1	-0.795536	7.94853	-5.7374	0.000236361	0.00341589	0.517797	1	2	MRPS34	16	mitochondrial ribosomal protein S34 [Source:HGNC Symbol;Acc:16618]
ENSG00000074181	0.393591	3.66994	2.28744	0.0467385	0.158436	-4.79895	0	0.585115	3.66994	3.40052	0.00736577	0.0417945	-3.07769	1	1	NOTCH3	19	notch 3 [Source:HGNC Symbol;Acc:7883]
ENSG00000074201	-0.538157	9.21457	-3.57534	0.0055527	0.0359639	-2.66231	0	-0.796945	9.21457	-5.29464	0.000427445	0.00519515	-0.106851	1	1	CLNS1A	11	chloride channel, nucleotide-sensitive, 1A [Source:HGNC Symbol;Acc:2080]
ENSG00000074266	-0.00508368	7.942	-0.0519534	0.959651	0.980807	-7.07904	0	0.814038	7.942	8.31918	1.21798e-05	0.000439697	3.64001	1	1	EED	11	embryonic ectoderm development [Source:HGNC Symbol;Acc:3188]
ENSG00000074370	0.0545758	4.76041	0.216872	0.832932	0.919582	-7.05475	0	1.07954	4.76041	4.28986	0.00181926	0.0149626	-1.62765	1	1	ATP2A3	17	ATPase, Ca++ transporting, ubiquitous [Source:HGNC Symbol;Acc:813]
ENSG00000074410	0.616346	3.77909	3.95316	0.00305232	0.0238778	-2.04508	1	0.788172	3.77909	5.05523	0.000595692	0.00658363	-0.456334	1	2	CA12	15	carbonic anhydrase XII [Source:HGNC Symbol;Acc:1371]
ENSG00000074416	-0.380561	9.2694	-1.83711	0.09789	0.261371	-5.49807	0	-1.64383	9.2694	-7.93534	1.80647e-05	0.000560984	3.22685	1	1	MGLL	3	monoglyceride lipase [Source:HGNC Symbol;Acc:17038]
ENSG00000074582	-0.818848	5.84501	-4.58243	0.00117549	0.0123	-1.05319	1	-0.680575	5.84501	-3.80863	0.00382934	0.025887	-2.40261	1	2	BCS1L	2	BCS1-like (S. cerevisiae) [Source:HGNC Symbol;Acc:1020]
ENSG00000074660	0.842783	5.35308	6.06551	0.000155037	0.00330664	1.06604	1	-0.225941	5.35308	-1.6261	0.136865	0.333263	-5.93545	0	1	SCARF1	17	scavenger receptor class F, member 1 [Source:HGNC Symbol;Acc:16820]
ENSG00000074696	-0.532642	8.9318	-2.73139	0.0222595	0.093927	-4.06995	0	-0.877988	8.9318	-4.50233	0.00132318	0.011881	-1.29449	1	1	PTPLAD1	15	protein tyrosine phosphatase-like A domain containing 1 [Source:HGNC Symbol;Acc:24175]
ENSG00000074800	0.593967	12.1039	5.21019	0.000480082	0.00678456	-0.117384	1	-0.45034	12.1039	-3.95031	0.00306591	0.0219651	-2.17174	0	1	ENO1	1	enolase 1, (alpha) [Source:HGNC Symbol;Acc:3350]
ENSG00000074842	-0.304906	9.87082	-2.20914	0.0532325	0.173153	-4.92433	0	-0.602545	9.87082	-4.36561	0.00162284	0.0137785	-1.5082	1	1	C19orf10	19	chromosome 19 open reading frame 10 [Source:HGNC Symbol;Acc:16948]
ENSG00000074935	0.60178	6.44443	2.92868	0.0160181	0.0745353	-3.74048	0	0.699954	6.44443	3.40647	0.00729493	0.0415502	-3.06777	1	1	TUBE1	6	tubulin, epsilon 1 [Source:HGNC Symbol;Acc:20775]
ENSG00000075131	-0.782376	5.07982	-8.54777	9.69627e-06	0.000612255	3.95096	1	-0.158185	5.07982	-1.72823	0.11651	0.30105	-5.79056	0	1	TIPIN	15	TIMELESS interacting protein [Source:HGNC Symbol;Acc:30750]
ENSG00000075151	-0.448364	7.28274	-2.82454	0.0190528	0.0842501	-3.91458	0	0.616252	7.28274	3.88218	0.00341078	0.0238065	-2.2825	1	1	EIF4G3	1	eukaryotic translation initiation factor 4 gamma, 3 [Source:HGNC Symbol;Acc:3298]
ENSG00000075188	-0.657414	6.72059	-4.78965	0.000869181	0.00997548	-0.738074	1	0.0332899	6.72059	0.242536	0.813563	0.910917	-7.18446	0	1	NUP37	12	nucleoporin 37kDa [Source:HGNC Symbol;Acc:29929]
ENSG00000075213	0.550005	5.49262	1.67776	0.126198	0.30797	-5.72912	0	2.47126	5.49262	7.53845	2.75821e-05	0.000746412	2.78232	1	1	SEMA3A	7	sema domain, immunoglobulin domain (Ig), short basic domain, secreted, (semaphorin) 3A [Source:HGNC Symbol;Acc:10723]
ENSG00000075223	0.768145	4.7171	4.60978	0.00112917	0.0119691	-1.01125	1	0.73464	4.7171	4.40872	0.00152125	0.0131501	-1.44056	1	2	SEMA3C	7	sema domain, immunoglobulin domain (Ig), short basic domain, secreted, (semaphorin) 3C [Source:HGNC Symbol;Acc:10725]
ENSG00000075239	-0.495786	5.45396	-3.50049	0.00626421	0.0389674	-2.78608	0	-0.654513	5.45396	-4.62118	0.00111046	0.0103727	-1.11075	1	1	ACAT1	11	acetyl-CoA acetyltransferase 1 [Source:HGNC Symbol;Acc:93]
ENSG00000075240	-0.420508	5.36146	-3.11047	0.0118501	0.0603304	-3.43617	0	-1.08932	5.36146	-8.05766	1.59073e-05	0.00051896	3.36026	1	1	GRAMD4	22	GRAM domain containing 4 [Source:HGNC Symbol;Acc:29113]
ENSG00000075336	-1.02578	7.38125	-6.55101	8.52491e-05	0.00225162	1.69172	1	-0.569628	7.38125	-3.63785	0.00502325	0.0314815	-2.68348	0	1	C18orf55	18	chromosome 18 open reading frame 55 [Source:HGNC Symbol;Acc:25010]
ENSG00000075399	0.849565	6.77707	6.60714	7.97067e-05	0.00215367	1.76198	1	1.62529	6.77707	12.64	3.20439e-07	4.50115e-05	7.38366	1	2	C16orf7	16	chromosome 16 open reading frame 7 [Source:HGNC Symbol;Acc:13526]
ENSG00000075420	0.495649	8.42506	2.78191	0.020458	0.0884657	-3.98575	0	1.85523	8.42506	10.4128	1.77876e-06	0.000133963	5.63903	1	1	FNDC3B	3	fibronectin type III domain containing 3B [Source:HGNC Symbol;Acc:24670]
ENSG00000075426	2.16997	7.52197	13.8892	1.37449e-07	5.50329e-05	8.20679	1	2.02113	7.52197	12.9365	2.60376e-07	3.95434e-05	7.59182	1	2	FOSL2	2	FOS-like antigen 2 [Source:HGNC Symbol;Acc:3798]
ENSG00000075884	-0.966854	6.61191	-3.22947	0.0097411	0.0524097	-3.23716	0	-1.87866	6.61191	-6.27507	0.00011932	0.00209996	1.23901	1	1	ARHGAP15	2	Rho GTPase activating protein 15 [Source:HGNC Symbol;Acc:21030]
ENSG00000076003	0.923974	5.2265	3.70384	0.00452121	0.0313954	-2.45086	1	1.43692	5.2265	5.76003	0.000229476	0.00334937	0.548978	1	2	MCM6	2	minichromosome maintenance complex component 6 [Source:HGNC Symbol;Acc:6949]
ENSG00000076248	-0.524477	4.79341	-2.64576	0.0256864	0.103778	-4.21229	0	-0.774412	4.79341	-3.90657	0.00328286	0.0231703	-2.2428	1	1	UNG	12	uracil-DNA glycosylase [Source:HGNC Symbol;Acc:12572]
ENSG00000076351	-0.744735	4.15324	-2.78523	0.0203449	0.088258	-3.98021	0	-1.54374	4.15324	-5.77342	0.000225508	0.00330813	0.567382	1	1	SLC46A1	17	solute carrier family 46 (folate transporter), member 1 [Source:HGNC Symbol;Acc:30521]
ENSG00000076382	1.08768	5.32415	4.52263	0.00128398	0.0131206	-1.14524	1	0.158082	5.32415	0.657316	0.526711	0.733252	-6.98434	0	1	SPAG5	17	sperm associated antigen 5 [Source:HGNC Symbol;Acc:13452]
ENSG00000076554	0.880116	6.54162	3.00946	0.0140067	0.0679022	-3.60527	0	4.18722	6.54162	14.3177	1.04461e-07	2.60457e-05	8.49803	1	1	TPD52	8	tumor protein D52 [Source:HGNC Symbol;Acc:12005]
ENSG00000076641	0.970617	7.42166	5.7602	0.000229428	0.00430899	0.655687	1	1.11028	7.42166	6.58901	8.14527e-05	0.0015891	1.64177	1	2	PAG1	8	phosphoprotein associated with glycosphingolipid microdomains 1 [Source:HGNC Symbol;Acc:30043]
ENSG00000076650	-0.740842	7.27362	-5.34983	0.000396417	0.00613412	0.083048	1	-0.503255	7.27362	-3.63415	0.00505304	0.031612	-2.68959	0	1	GPATCH1	19	G patch domain containing 1 [Source:HGNC Symbol;Acc:24658]
ENSG00000077063	-2.08688	6.12335	-6.38073	0.000104787	0.00254624	1.47596	1	0.3352	6.12335	1.02489	0.331012	0.571325	-6.66901	0	1	CTTNBP2	7	cortactin binding protein 2 [Source:HGNC Symbol;Acc:15679]
ENSG00000077150	0.868478	5.15213	3.27867	0.00898598	0.0497348	-3.15499	1	0.258753	5.15213	0.976842	0.353066	0.592151	-6.71681	0	1	NFKB2	10	nuclear factor of kappa light polypeptide gene enhancer in B-cells 2 (p49/p100) [Source:HGNC Symbol;Acc:7795]
ENSG00000077232	-0.28427	6.74148	-2.13203	0.0604784	0.189514	-5.04645	0	1.0402	6.74148	7.80154	2.0797e-05	0.000620327	3.07901	1	1	DNAJC10	2	DnaJ (Hsp40) homolog, subfamily C, member 10 [Source:HGNC Symbol;Acc:24637]
ENSG00000077420	-1.30129	6.75826	-7.3097	3.54698e-05	0.00134575	2.6067	1	-0.656934	6.75826	-3.69018	0.00462064	0.0296654	-2.59713	1	2	APBB1IP	10	amyloid beta (A4) precursor protein-binding, family B, member 1 interacting protein [Source:HGNC Symbol;Acc:17379]
ENSG00000077522	0.649197	3.47582	4.01184	0.00278602	0.0224138	-1.95053	1	0.110828	3.47582	0.684881	0.509919	0.720966	-6.96492	0	1	ACTN2	1	actinin, alpha 2 [Source:HGNC Symbol;Acc:164]
ENSG00000077585	0.821546	9.31848	4.59547	0.00115317	0.0121504	-1.0332	1	1.12682	9.31848	6.30306	0.000115268	0.00204912	1.27546	1	2	GPR137B	1	G protein-coupled receptor 137B [Source:HGNC Symbol;Acc:11862]
ENSG00000077713	-0.784459	4.97176	-4.98496	0.000657672	0.00838313	-0.446647	1	-1.2733	4.97176	-8.09137	1.53635e-05	0.000509714	3.39673	1	2	SLC25A43	X	solute carrier family 25, member 43 [Source:HGNC Symbol;Acc:30557]
ENSG00000077782	1.3672	4.65713	7.33311	3.45593e-05	0.00133813	2.63378	1	0.523902	4.65713	2.81	0.0195209	0.0864939	-4.06789	0	1	FGFR1	8	fibroblast growth factor receptor 1 [Source:HGNC Symbol;Acc:3688]
ENSG00000078070	-0.40921	6.13633	-2.14463	0.0592326	0.186439	-5.02659	0	-0.72642	6.13633	-3.8071	0.00383862	0.0259398	-2.40512	1	1	MCCC1	3	methylcrotonoyl-CoA carboxylase 1 (alpha) [Source:HGNC Symbol;Acc:6936]
ENSG00000078304	-0.602856	8.24242	-4.15432	0.00223642	0.0191483	-1.72262	1	-0.333966	8.24242	-2.30138	0.0456666	0.159057	-4.90787	0	1	PPP2R5C	14	protein phosphatase 2, regulatory subunit B', gamma [Source:HGNC Symbol;Acc:9311]
ENSG00000078401	1.26011	4.47502	3.56535	0.00564251	0.0363585	-2.6788	1	1.28065	4.47502	3.62346	0.00514026	0.0319986	-2.70727	1	2	EDN1	6	endothelin 1 [Source:HGNC Symbol;Acc:3176]
ENSG00000078403	-0.593082	4.76221	-4.71774	0.000964503	0.0107406	-0.846745	1	-0.409029	4.76221	-3.25367	0.0093618	0.0504518	-3.32331	0	1	MLLT10	10	myeloid/lymphoid or mixed-lineage leukemia (trithorax homolog, Drosophila); translocated to, 10 [Source:HGNC Symbol;Acc:16063]
ENSG00000078668	0.581881	10.9093	3.81379	0.00379831	0.0280096	-2.27115	0	1.09183	10.9093	7.15609	4.21332e-05	0.00100648	2.33652	1	1	VDAC3	8	voltage-dependent anion channel 3 [Source:HGNC Symbol;Acc:12674]
ENSG00000078674	-0.601082	5.34928	-5.44356	0.000349146	0.0056425	0.215988	1	-0.448932	5.34928	-4.06565	0.00256331	0.0192239	-1.98542	0	1	PCM1	8	pericentriolar material 1 [Source:HGNC Symbol;Acc:8727]
ENSG00000078687	0.180374	4.43062	0.687278	0.508473	0.716679	-6.82742	0	1.92834	4.43062	7.34754	3.40109e-05	0.000859641	2.56195	1	1	TNRC6C	17	trinucleotide repeat containing 6C [Source:HGNC Symbol;Acc:29318]
ENSG00000078804	1.25823	6.68041	12.4815	3.58676e-07	9.02685e-05	7.27704	1	1.14202	6.68041	11.3288	8.48226e-07	8.59278e-05	6.39797	1	2	TP53INP2	20	tumor protein p53 inducible nuclear protein 2 [Source:HGNC Symbol;Acc:16104]
ENSG00000079134	-0.695139	7.14505	-4.44563	0.00143963	0.0141213	-1.26447	1	-0.39656	7.14505	-2.53612	0.0308574	0.121072	-4.52391	0	1	THOC1	18	THO complex 1 [Source:HGNC Symbol;Acc:19070]
ENSG00000079215	0.696919	5.45734	5.6604	0.000261499	0.00469128	0.51867	1	0.270188	5.45734	2.19448	0.0545419	0.180558	-5.07946	0	1	SLC1A3	5	solute carrier family 1 (glial high affinity glutamate transporter), member 3 [Source:HGNC Symbol;Acc:10941]
ENSG00000079257	-1.15326	7.79632	-5.62387	0.000274423	0.00482485	0.468156	1	-1.14793	7.79632	-5.59787	0.00028404	0.00389411	0.323981	1	2	LXN	3	latexin [Source:HGNC Symbol;Acc:13347]
ENSG00000079308	0.317533	4.68178	2.76774	0.0209478	0.0899212	-4.00937	0	-0.715016	4.68178	-6.23236	0.000125802	0.00216855	1.18319	1	1	TNS1	2	tensin 1 [Source:HGNC Symbol;Acc:11973]
ENSG00000079459	-0.607516	7.45013	-3.63344	0.00505882	0.0337414	-2.56654	1	-0.229075	7.45013	-1.37005	0.202435	0.426031	-6.27552	0	1	FDFT1	8	farnesyl-diphosphate farnesyltransferase 1 [Source:HGNC Symbol;Acc:3629]
ENSG00000079739	2.4181	5.88503	8.91876	6.7649e-06	0.000504988	4.32143	1	-0.840726	5.88503	-3.10088	0.0120394	0.0606512	-3.57968	0	1	PGM1	1	phosphoglucomutase 1 [Source:HGNC Symbol;Acc:8905]
ENSG00000079785	-0.740112	8.67262	-5.32078	0.000412434	0.0062475	0.0415843	1	-0.607423	8.67262	-4.36686	0.0016198	0.0137656	-1.50624	1	2	DDX1	2	DEAD (Asp-Glu-Ala-Asp) box polypeptide 1 [Source:HGNC Symbol;Acc:2734]
ENSG00000079819	-0.0669196	4.82867	-0.363201	0.724472	0.857211	-7.00857	0	-1.36076	4.82867	-7.38542	3.26158e-05	0.000842394	2.60602	1	1	EPB41L2	6	erythrocyte membrane protein band 4.1-like 2 [Source:HGNC Symbol;Acc:3379]
ENSG00000079974	-0.44573	8.01019	-2.37073	0.0406813	0.143681	-4.66427	0	-0.992905	8.01019	-5.28103	0.000435492	0.00525124	-0.1265	1	1	RABL2B	22	RAB, member of RAS oncogene family-like 2B [Source:HGNC Symbol;Acc:9800]
ENSG00000080200	0.76183	8.99039	5.07949	0.000575775	0.00769607	-0.307559	1	1.86748	8.99039	12.4514	3.66506e-07	4.96672e-05	7.24856	1	2	CRYBG3	3	beta-gamma crystallin domain containing 3 [Source:HGNC Symbol;Acc:34427]
ENSG00000080503	0.235694	7.88154	0.990374	0.346747	0.577104	-6.56822	0	1.22652	7.88154	5.15376	0.000519118	0.00593851	-0.311503	1	1	SMARCA2	9	SWI/SNF related, matrix associated, actin dependent regulator of chromatin, subfamily a, member 2 [Source:HGNC Symbol;Acc:11098]
ENSG00000080546	-1.05498	6.20843	-4.1952	0.00210083	0.0183583	-1.65766	1	-0.941336	6.20843	-3.74328	0.00424661	0.0279373	-2.50977	1	2	SESN1	6	sestrin 1 [Source:HGNC Symbol;Acc:21595]
ENSG00000080573	0.823883	3.69952	3.43436	0.00697199	0.0416076	-2.89577	1	0.296595	3.69952	1.23635	0.246265	0.478383	-6.43774	0	1	COL5A3	19	collagen, type V, alpha 3 [Source:HGNC Symbol;Acc:14864]
ENSG00000080608	-0.996376	6.81849	-3.60147	0.00532461	0.0348713	-2.61921	1	-0.641185	6.81849	-2.3176	0.0444491	0.156154	-4.88163	0	1	KIAA0020	9	KIAA0020 [Source:HGNC Symbol;Acc:29676]
ENSG00000080822	0.764905	8.76718	5.42934	0.000355908	0.00571042	0.195902	1	0.662917	8.76718	4.70542	0.000981923	0.00950992	-0.981667	1	2	CLDND1	3	claudin domain containing 1 [Source:HGNC Symbol;Acc:1322]
ENSG00000080824	1.00912	8.62164	4.03311	0.00269562	0.0219348	-1.91635	1	-0.395785	8.62164	-1.58181	0.146647	0.347892	-5.99675	0	1	HSP90AA1	14	heat shock protein 90kDa alpha (cytosolic), class A member 1 [Source:HGNC Symbol;Acc:5253]
ENSG00000081026	0.656378	3.67973	5.11158	0.000550521	0.00742613	-0.260639	1	0.471245	3.67973	3.66984	0.00477294	0.0303775	-2.63066	0	1	MAGI3	1	membrane associated guanylate kinase, WW and PDZ domain containing 3 [Source:HGNC Symbol;Acc:29647]
ENSG00000081041	1.95026	11.498	7.14901	4.24713e-05	0.00149046	2.41904	1	0.84026	11.498	3.08012	0.0124596	0.0621571	-3.61453	0	1	CXCL2	4	chemokine (C-X-C motif) ligand 2 [Source:HGNC Symbol;Acc:4603]
ENSG00000081087	-0.109265	7.75732	-0.823818	0.430406	0.654965	-6.72067	0	0.728445	7.75732	5.49222	0.000327031	0.00431236	0.175365	1	1	OSTM1	6	osteopetrosis associated transmembrane protein 1 [Source:HGNC Symbol;Acc:21652]
ENSG00000081181	0.36307	4.61951	1.27779	0.231914	0.453749	-6.254	0	1.74185	4.61951	6.13026	0.0001429	0.00239076	1.04873	1	1	ARG2	14	arginase, type II [Source:HGNC Symbol;Acc:664]
ENSG00000081189	-0.00098223	6.7688	-0.00340021	0.997358	0.998775	-7.08051	0	-1.3654	6.7688	-4.72666	0.000952101	0.00930292	-0.949289	1	1	MEF2C	5	myocyte enhancer factor 2C [Source:HGNC Symbol;Acc:6996]
ENSG00000081307	-0.645231	5.78025	-4.29132	0.00181525	0.0165183	-1.5058	1	-0.237877	5.78025	-1.58208	0.146587	0.347848	-5.99639	0	1	UBA5	3	ubiquitin-like modifier activating enzyme 5 [Source:HGNC Symbol;Acc:23230]
ENSG00000081721	-0.696915	8.02553	-5.30048	0.000424038	0.00635228	0.0125382	1	-0.143669	8.02553	-1.09269	0.301684	0.540741	-6.59847	0	1	DUSP12	1	dual specificity phosphatase 12 [Source:HGNC Symbol;Acc:3067]
ENSG00000081913	0.406433	4.13223	3.5013	0.00625601	0.0389305	-2.78473	0	0.986946	4.13223	8.50226	1.01427e-05	0.000390141	3.83152	1	1	PHLPP1	18	PH domain and leucine rich repeat protein phosphatase 1 [Source:HGNC Symbol;Acc:20610]
ENSG00000081923	-1.54239	4.34783	-5.80127	0.000217485	0.0041299	0.711665	1	0.168953	4.34783	0.63547	0.540251	0.74258	-6.99922	0	1	ATP8B1	18	ATPase, aminophospholipid transporter, class I, type 8B, member 1 [Source:HGNC Symbol;Acc:3706]
ENSG00000082074	-1.39032	9.53225	-7.96263	1.75571e-05	0.000866425	3.33724	1	-0.731047	9.53225	-4.18685	0.00212781	0.0167496	-1.79127	1	2	FYB	5	FYN binding protein [Source:HGNC Symbol;Acc:4036]
ENSG00000082213	0.55761	5.51132	3.43621	0.0069511	0.0415369	-2.89269	0	1.05795	5.51132	6.51947	8.85467e-05	0.00169952	1.55369	1	1	C5orf22	5	chromosome 5 open reading frame 22 [Source:HGNC Symbol;Acc:25639]
ENSG00000082269	-1.35152	7.4068	-5.27565	0.000438713	0.00646221	-0.023073	1	-1.12211	7.4068	-4.38016	0.00158778	0.0135654	-1.48534	1	2	FAM135A	6	family with sequence similarity 135, member A [Source:HGNC Symbol;Acc:21084]
ENSG00000082397	0.361611	9.75519	2.58448	0.0284593	0.112037	-4.31376	0	1.46854	9.75519	10.4959	1.65944e-06	0.000129356	5.71049	1	1	EPB41L3	18	erythrocyte membrane protein band 4.1-like 3 [Source:HGNC Symbol;Acc:3380]
ENSG00000082438	0.223518	3.22306	1.68712	0.124348	0.305144	-5.71585	0	-0.840058	3.22306	-6.34078	0.000110042	0.00198019	1.32442	1	1	COBLL1	2	COBL-like 1 [Source:HGNC Symbol;Acc:23571]
ENSG00000082512	-0.911339	5.26636	-3.87695	0.00343891	0.025968	-2.16844	1	-1.52849	5.26636	-6.50237	9.03923e-05	0.00172716	1.53193	1	2	TRAF5	1	TNF receptor-associated factor 5 [Source:HGNC Symbol;Acc:12035]
ENSG00000082516	-0.959672	5.2511	-6.90494	5.61533e-05	0.0017097	2.12779	1	-0.521769	5.2511	-3.75419	0.00417375	0.0276633	-2.49185	0	1	GEMIN5	5	gem (nuclear organelle) associated protein 5 [Source:HGNC Symbol;Acc:20043]
ENSG00000082781	-0.69153	9.79623	-3.30507	0.00860614	0.0482541	-3.11095	1	0.191259	9.79623	0.914093	0.383469	0.620175	-6.77639	0	1	ITGB5	3	integrin, beta 5 [Source:HGNC Symbol;Acc:6160]
ENSG00000082898	-0.674306	8.26116	-5.58146	0.000290298	0.00499431	0.409265	1	-0.245584	8.26116	-2.03278	0.0712124	0.215781	-5.33384	0	1	XPO1	2	exportin 1 (CRM1 homolog, yeast) [Source:HGNC Symbol;Acc:12825]
ENSG00000082996	0.61492	10.7053	3.76982	0.00407167	0.0292672	-2.34288	1	0.224914	10.7053	1.37885	0.199797	0.422853	-6.26445	0	1	RNF13	3	ring finger protein 13 [Source:HGNC Symbol;Acc:10057]
ENSG00000083093	-1.08917	6.72603	-3.66968	0.00477422	0.0324864	-2.50695	1	-0.535831	6.72603	-1.80535	0.103016	0.277583	-5.67818	0	1	PALB2	16	partner and localizer of BRCA2 [Source:HGNC Symbol;Acc:26144]
ENSG00000083290	0.682922	4.83516	6.52457	8.80043e-05	0.00229685	1.65847	1	0.568291	4.83516	5.4294	0.000355878	0.00457294	0.0862517	0	1	ULK2	17	unc-51-like kinase 2 (C. elegans) [Source:HGNC Symbol;Acc:13480]
ENSG00000083457	-0.771593	9.40367	-5.78838	0.000221161	0.00418046	0.694118	1	-0.133397	9.40367	-1.00073	0.34197	0.581636	-6.69328	0	1	ITGAE	17	integrin, alpha E (antigen CD103, human mucosal lymphocyte antigen 1; alpha polypeptide) [Source:HGNC Symbol;Acc:6147]
ENSG00000083635	-0.877856	4.93226	-6.41685	0.000100269	0.002481	1.52205	1	-0.531292	4.93226	-3.88357	0.00340334	0.0237641	-2.28023	0	1	NUFIP1	13	nuclear fragile X mental retardation protein interacting protein 1 [Source:HGNC Symbol;Acc:8057]
ENSG00000083720	0.0829759	5.07971	0.318535	0.757029	0.876023	-7.02509	0	2.17687	5.07971	8.35675	1.17279e-05	0.000430735	3.67959	1	1	OXCT1	5	3-oxoacid CoA transferase 1 [Source:HGNC Symbol;Acc:8527]
ENSG00000083845	-0.351745	10.9788	-3.30785	0.00856714	0.0480966	-3.10632	0	-0.864549	10.9788	-8.13031	1.47602e-05	0.000496243	3.43872	1	1	RPS5	19	ribosomal protein S5 [Source:HGNC Symbol;Acc:10426]
ENSG00000084073	-0.534282	6.94185	-4.81707	0.000835543	0.00973897	-0.696843	0	0.586686	6.94185	5.28955	0.000430437	0.00520811	-0.114199	1	1	ZMPSTE24	1	zinc metallopeptidase (STE24 homolog, S. cerevisiae) [Source:HGNC Symbol;Acc:12877]
ENSG00000084207	-0.253858	11.2903	-2.14382	0.0593123	0.186524	-5.02788	0	-0.624265	11.2903	-5.27189	0.000440986	0.00529574	-0.139707	1	1	GSTP1	11	glutathione S-transferase pi 1 [Source:HGNC Symbol;Acc:4638]
ENSG00000084234	0.310446	10.951	2.43973	0.0362544	0.132947	-4.55182	0	0.643918	10.951	5.0604	0.000591386	0.00655418	-0.448699	1	1	APLP2	11	amyloid beta (A4) precursor-like protein 2 [Source:HGNC Symbol;Acc:598]
ENSG00000084676	0.716232	7.88493	6.46556	9.4507e-05	0.00237964	1.58394	1	0.627257	7.88493	5.66237	0.000260823	0.00366713	0.413915	1	2	NCOA1	2	nuclear receptor coactivator 1 [Source:HGNC Symbol;Acc:7668]
ENSG00000084731	0.256778	3.98788	1.70154	0.121545	0.300507	-5.69532	0	0.882893	3.98788	5.85051	0.000204046	0.00308027	0.672891	1	1	KIF3C	2	kinesin family member 3C [Source:HGNC Symbol;Acc:6321]
ENSG00000084734	4.2972	4.60792	24.0089	9.07395e-10	5.73442e-06	12.5945	1	0.34952	4.60792	1.9528	0.0811598	0.23644	-5.45691	0	1	GCKR	2	glucokinase (hexokinase 4) regulator [Source:HGNC Symbol;Acc:4196]
ENSG00000084774	-1.18848	6.28693	-4.41153	0.00151486	0.0146173	-1.31753	1	-0.559124	6.28693	-2.07542	0.0663949	0.205893	-5.26744	0	1	CAD	2	carbamoyl-phosphate synthetase 2, aspartate transcarbamylase, and dihydroorotase [Source:HGNC Symbol;Acc:1424]
ENSG00000085117	1.14677	9.99789	5.44408	0.0003489	0.0056425	0.216724	1	2.57467	9.99789	12.2228	4.32376e-07	5.60085e-05	7.08189	1	2	CD82	11	CD82 molecule [Source:HGNC Symbol;Acc:6210]
ENSG00000085231	-0.345989	8.4533	-2.88657	0.0171812	0.0782121	-3.81092	0	-0.663662	8.4533	-5.5369	0.000308049	0.00413951	0.238414	1	1	TAF9	5	TAF9 RNA polymerase II, TATA box binding protein (TBP)-associated factor, 32kDa [Source:HGNC Symbol;Acc:11542]
ENSG00000085265	0.262856	9.90687	0.707469	0.496404	0.706108	-6.81272	0	-1.62816	9.90687	-4.38216	0.00158302	0.0135445	-1.48221	1	1	FCN1	9	ficolin (collagen/fibrinogen domain containing) 1 [Source:HGNC Symbol;Acc:3623]
ENSG00000085365	1.19943	6.01135	5.53306	0.000309632	0.00520993	0.341747	1	0.929784	6.01135	4.28915	0.00182122	0.0149717	-1.62878	1	2	SCAMP1	5	secretory carrier membrane protein 1 [Source:HGNC Symbol;Acc:10563]
ENSG00000085491	-0.603918	6.49983	-4.84809	0.00079914	0.00948332	-0.6503	1	-0.107334	6.49983	-0.86165	0.410277	0.643391	-6.82365	0	1	SLC25A24	1	solute carrier family 25 (mitochondrial carrier; phosphate carrier), member 24 [Source:HGNC Symbol;Acc:20662]
ENSG00000085514	0.668624	10.0715	3.98624	0.00289902	0.022992	-1.99172	1	0.885365	10.0715	5.27842	0.00043705	0.00526642	-0.130263	1	2	PILRA	7	paired immunoglobin-like type 2 receptor alpha [Source:HGNC Symbol;Acc:20396]
ENSG00000085733	0.650063	4.40883	5.38241	0.000379249	0.00593888	0.129398	1	0.649896	4.40883	5.38102	0.000379963	0.00481222	0.0172305	1	2	CTTN	11	cortactin [Source:HGNC Symbol;Acc:3338]
ENSG00000085741	0.637001	4.26801	2.34089	0.0427576	0.148455	-4.71267	0	3.1928	4.26801	11.7331	6.21915e-07	7.16776e-05	6.7138	1	1	WNT11	11	wingless-type MMTV integration site family, member 11 [Source:HGNC Symbol;Acc:12776]
ENSG00000085788	-0.69407	5.51476	-7.07217	4.63399e-05	0.00154616	2.32817	1	-0.317031	5.51476	-3.23036	0.00972678	0.0517525	-3.36238	0	1	DDHD2	8	DDHD domain containing 2 [Source:HGNC Symbol;Acc:29106]
ENSG00000085871	-0.0516686	8.21303	-0.219783	0.83073	0.918518	-7.05406	0	-2.25689	8.21303	-9.60015	3.6005e-06	0.000202006	4.91032	1	1	MGST2	4	microsomal glutathione S-transferase 2 [Source:HGNC Symbol;Acc:7063]
ENSG00000086061	0.49364	10.1957	2.7956	0.0199958	0.0871944	-3.96291	0	0.740094	10.1957	4.19133	0.00211331	0.0166727	-1.78413	1	1	DNAJA1	9	DnaJ (Hsp40) homolog, subfamily A, member 1 [Source:HGNC Symbol;Acc:5229]
ENSG00000086062	0.272566	4.52262	2.86899	0.0176919	0.0798969	-3.84032	0	0.602547	4.52262	6.34233	0.000109834	0.00198019	1.32642	1	1	B4GALT1	9	UDP-Gal:betaGlcNAc beta 1,4- galactosyltransferase, polypeptide 1 [Source:HGNC Symbol;Acc:924]
ENSG00000086065	0.31361	10.784	3.24828	0.00944484	0.0513232	-3.20572	0	0.755937	10.784	7.82978	2.01849e-05	0.000605786	3.11038	1	1	CHMP5	9	charged multivesicular body protein 5 [Source:HGNC Symbol;Acc:26942]
ENSG00000086189	-1.04391	6.13843	-8.01624	1.66045e-05	0.000839105	3.39503	1	-0.720091	6.13843	-5.5296	0.000311066	0.0041705	0.228138	1	2	DIMT1	5	DIM1 dimethyladenosine transferase 1 homolog (S. cerevisiae) [Source:HGNC Symbol;Acc:30217]
ENSG00000086200	-0.783952	4.59832	-5.23963	0.000460982	0.00665837	-0.0748959	1	-0.345365	4.59832	-2.30829	0.0451443	0.157712	-4.8967	0	1	IPO11	5	importin 11 [Source:HGNC Symbol;Acc:20628]
ENSG00000086289	0.571815	4.13183	3.27649	0.00901816	0.049866	-3.15863	0	0.634694	4.13183	3.63678	0.00503182	0.031524	-2.68524	1	1	EPDR1	7	ependymin related protein 1 (zebrafish) [Source:HGNC Symbol;Acc:17572]
ENSG00000086300	-0.0634474	7.84656	-0.383927	0.709556	0.848855	-7.00019	0	1.99585	7.84656	12.0771	4.81086e-07	6.05379e-05	6.97401	1	1	SNX10	7	sorting nexin 10 [Source:HGNC Symbol;Acc:14974]
ENSG00000086619	0.917001	5.93434	6.31746	0.000113242	0.00268129	1.39479	1	0.790059	5.93434	5.44293	0.000349442	0.00450998	0.105489	1	2	ERO1LB	1	ERO1-like beta (S. cerevisiae) [Source:HGNC Symbol;Acc:14355]
ENSG00000086666	0.420341	7.76077	2.32815	0.0436753	0.150927	-4.73329	0	0.666175	7.76077	3.68975	0.00462384	0.0296751	-2.59785	1	1	ZFAND6	15	zinc finger, AN1-type domain 6 [Source:HGNC Symbol;Acc:30164]
ENSG00000087008	0.988646	7.19726	4.86122	0.000784249	0.00940512	-0.630646	1	-0.235293	7.19726	-1.15695	0.275788	0.512777	-6.52841	0	1	ACOX3	4	acyl-CoA oxidase 3, pristanoyl [Source:HGNC Symbol;Acc:121]
ENSG00000087074	1.47271	6.61408	10.5152	1.63288e-06	0.000206953	5.76889	1	0.691063	6.61408	4.93424	0.000706692	0.00746391	-0.636083	1	2	PPP1R15A	19	protein phosphatase 1, regulatory subunit 15A [Source:HGNC Symbol;Acc:14375]
ENSG00000087076	-0.627072	5.64674	-2.58055	0.028647	0.11255	-4.32025	0	-2.63721	5.64674	-10.8528	1.23797e-06	0.000108504	6.01137	1	1	HSD17B14	19	hydroxysteroid (17-beta) dehydrogenase 14 [Source:HGNC Symbol;Acc:23238]
ENSG00000087077	-0.125351	6.41032	-0.441503	0.66881	0.824061	-6.97456	0	-1.33399	6.41032	-4.69847	0.000991901	0.00956449	-0.99228	1	1	TRIP6	7	thyroid hormone receptor interactor 6 [Source:HGNC Symbol;Acc:12311]
ENSG00000087157	0.595434	4.27903	5.31265	0.000417043	0.00629568	0.0299495	1	0.168161	4.27903	1.50039	0.166263	0.376002	-6.10687	0	1	PGS1	17	phosphatidylglycerophosphate synthase 1 [Source:HGNC Symbol;Acc:30029]
ENSG00000087245	-0.414041	4.38783	-2.80289	0.0197537	0.0865141	-3.95073	0	-0.871159	4.38783	-5.8974	0.00019208	0.00294763	0.736652	1	1	MMP2	16	matrix metallopeptidase 2 (gelatinase A, 72kDa gelatinase, 72kDa type IV collagenase) [Source:HGNC Symbol;Acc:7166]
ENSG00000087250	1.52113	4.26792	7.26015	3.74843e-05	0.00137986	2.54918	1	0.816795	4.26792	3.89846	0.00332485	0.0233828	-2.256	1	2	MT3	16	metallothionein 3 [Source:HGNC Symbol;Acc:7408]
ENSG00000087253	-0.627293	6.76908	-1.99427	0.0758487	0.2201	-5.26078	0	1.18317	6.76908	3.76149	0.00412576	0.0273918	-2.47987	1	1	LPCAT2	16	lysophosphatidylcholine acyltransferase 2 [Source:HGNC Symbol;Acc:26032]
ENSG00000087263	-0.643322	5.79021	-5.55691	0.000299935	0.00510843	0.375065	1	-0.238931	5.79021	-2.06384	0.0676706	0.208564	-5.28551	0	1	OGFOD1	16	2-oxoglutarate and iron-dependent oxygenase domain containing 1 [Source:HGNC Symbol;Acc:25585]
ENSG00000087269	-0.628665	3.93556	-4.75617	0.00091225	0.0103551	-0.788585	1	-0.0845378	3.93556	-0.639572	0.537693	0.740852	-6.99646	0	1	NOP14	4	NOP14 nucleolar protein homolog (yeast) [Source:HGNC Symbol;Acc:16821]
ENSG00000087301	-0.554651	5.65471	-3.1043	0.0119715	0.0607545	-3.44649	0	-1.43185	5.65471	-8.01385	1.66458e-05	0.000538072	3.31267	1	1	TXNDC16	14	thioredoxin domain containing 16 [Source:HGNC Symbol;Acc:19965]
ENSG00000087448	-0.322582	5.55952	-1.76292	0.110252	0.28165	-5.60695	0	-0.902289	5.55952	-4.93102	0.000709928	0.00748462	-0.640887	1	1	KLHDC5	12	kelch domain containing 5 [Source:HGNC Symbol;Acc:29252]
ENSG00000087510	0.24579	3.24757	1.25969	0.238094	0.460377	-6.27551	0	1.03407	3.24757	5.29972	0.000424482	0.00517158	-0.0995229	1	1	TFAP2C	20	transcription factor AP-2 gamma (activating enhancer binding protein 2 gamma) [Source:HGNC Symbol;Acc:11744]
ENSG00000087842	1.22619	8.15038	4.9112	0.000730236	0.0089831	-0.556066	1	-0.459531	8.15038	-1.84053	0.0973515	0.266808	-5.6261	0	1	PIR	X	pirin (iron-binding nuclear protein) [Source:HGNC Symbol;Acc:30048]
ENSG00000087903	0.357264	5.02646	2.26438	0.0485662	0.162587	-4.836	0	0.98942	5.02646	6.27105	0.000119914	0.00210549	1.23377	1	1	RFX2	19	regulatory factor X, 2 (influences HLA class II expression) [Source:HGNC Symbol;Acc:9983]
ENSG00000088179	-1.00878	6.23389	-5.06821	0.000584944	0.00777732	-0.324085	1	-0.793119	6.23389	-3.98469	0.00290604	0.0211723	-2.11605	1	2	PTPN4	2	protein tyrosine phosphatase, non-receptor type 4 (megakaryocyte) [Source:HGNC Symbol;Acc:9656]
ENSG00000088448	1.00095	8.87642	9.55665	3.74422e-06	0.000338266	4.92703	1	0.084058	8.87642	0.802549	0.442012	0.668808	-6.87403	0	1	ANKRD10	13	ankyrin repeat domain 10 [Source:HGNC Symbol;Acc:20265]
ENSG00000088808	0.617859	5.1964	1.88496	0.0906132	0.247805	-5.42673	0	1.41712	5.1964	4.32334	0.0017295	0.0144128	-1.57476	1	1	PPP1R13B	14	protein phosphatase 1, regulatory subunit 13B [Source:HGNC Symbol;Acc:14950]
ENSG00000088826	1.35426	5.52675	7.08038	4.5909e-05	0.00154584	2.33791	1	1.43747	5.52675	7.5154	2.82828e-05	0.000761863	2.75594	1	2	SMOX	20	spermine oxidase [Source:HGNC Symbol;Acc:15862]
ENSG00000088827	-1.04985	9.08054	-2.18322	0.0555687	0.178609	-4.96553	0	-2.23127	9.08054	-4.64005	0.00108018	0.0101925	-1.08175	1	1	SIGLEC1	20	sialic acid binding Ig-like lectin 1, sialoadhesin [Source:HGNC Symbol;Acc:11127]
ENSG00000088833	0.0832362	7.62568	0.587559	0.570643	0.761282	-6.89432	0	0.825979	7.62568	5.83053	0.000209388	0.00314569	0.645624	1	1	NSFL1C	20	NSFL1 (p97) cofactor (p47) [Source:HGNC Symbol;Acc:15912]
ENSG00000088854	-0.493725	6.64363	-3.56139	0.00567862	0.036511	-2.68535	0	-0.92759	6.64363	-6.69099	7.21429e-05	0.00146085	1.76977	1	1	C20orf194	20	chromosome 20 open reading frame 194 [Source:HGNC Symbol;Acc:17721]
ENSG00000088992	-1.55161	5.94908	-3.91713	0.00322905	0.0248194	-2.10332	1	-2.50801	5.94908	-6.33162	0.000111288	0.00198839	1.31254	1	2	TESC	12	tescalcin [Source:HGNC Symbol;Acc:26065]
ENSG00000089006	-0.924796	7.747	-4.5515	0.00123034	0.0126754	-1.10075	1	-0.589105	7.747	-2.89935	0.0168193	0.077628	-3.9181	0	1	SNX5	20	sorting nexin 5 [Source:HGNC Symbol;Acc:14969]
ENSG00000089041	-0.892967	5.13042	-2.36936	0.0407746	0.143838	-4.6665	0	-1.52266	5.13042	-4.04016	0.00266637	0.0197616	-2.02647	1	1	P2RX7	12	purinergic receptor P2X, ligand-gated ion channel, 7 [Source:HGNC Symbol;Acc:8537]
ENSG00000089048	-0.740758	7.68534	-5.0244	0.000622074	0.00809983	-0.388454	1	-0.562749	7.68534	-3.81701	0.00377906	0.0256652	-2.3889	0	1	ESF1	20	ESF1, nucleolar pre-rRNA processing protein, homolog (S. cerevisiae) [Source:HGNC Symbol;Acc:15898]
ENSG00000089053	-0.793712	9.05033	-6.38945	0.000103676	0.00252973	1.4871	1	-0.586805	9.05033	-4.72382	0.000956024	0.00931026	-0.953605	1	2	ANAPC5	12	anaphase promoting complex subunit 5 [Source:HGNC Symbol;Acc:15713]
ENSG00000089057	-1.44342	5.17066	-12.4832	3.58243e-07	9.02685e-05	7.27822	1	-0.965495	5.17066	-8.34996	1.18082e-05	0.000431301	3.67245	1	2	SLC23A2	20	solute carrier family 23 (nucleobase transporters), member 2 [Source:HGNC Symbol;Acc:10973]
ENSG00000089220	-0.656883	9.48971	-4.83258	0.000817123	0.0096273	-0.673552	1	-1.379	9.48971	-10.1451	2.23197e-06	0.000156389	5.40507	1	2	PEBP1	12	phosphatidylethanolamine binding protein 1 [Source:HGNC Symbol;Acc:8630]
ENSG00000089248	-0.388108	10.8176	-2.89167	0.0170358	0.0777123	-3.80239	0	-1.77636	10.8176	-13.2351	2.12179e-07	3.72468e-05	7.79633	1	1	ERP29	12	endoplasmic reticulum protein 29 [Source:HGNC Symbol;Acc:13799]
ENSG00000089289	-0.250576	9.94634	-2.52615	0.0313765	0.119689	-4.40999	0	-0.646827	9.94634	-6.52091	8.83933e-05	0.00169952	1.55552	1	1	IGBP1	X	immunoglobulin (CD79A) binding protein 1 [Source:HGNC Symbol;Acc:5461]
ENSG00000089327	-0.061875	8.94812	-0.549003	0.595776	0.77741	-6.91759	0	-0.967084	8.94812	-8.58071	9.38652e-06	0.000374123	3.91252	1	1	FXYD5	19	FXYD domain containing ion transport regulator 5 [Source:HGNC Symbol;Acc:4029]
ENSG00000089351	1.39447	9.92018	7.3161	3.52186e-05	0.00134575	2.6141	1	2.19767	9.92018	11.5301	7.25896e-07	7.96808e-05	6.55664	1	2	GRAMD1A	19	GRAM domain containing 1A [Source:HGNC Symbol;Acc:29305]
ENSG00000089775	-0.443391	5.88061	-2.46947	0.0344961	0.128264	-4.50312	0	-0.587294	5.88061	-3.27094	0.00910047	0.0492847	-3.29437	1	1	ZBTB25	14	zinc finger and BTB domain containing 25 [Source:HGNC Symbol;Acc:13112]
ENSG00000089902	0.535203	5.00781	3.32039	0.00839332	0.0473927	-3.08541	0	0.857266	5.00781	5.31846	0.000413742	0.00507583	-0.0725217	1	1	RCOR1	14	REST corepressor 1 [Source:HGNC Symbol;Acc:17441]
ENSG00000090013	-0.208954	10.3788	-1.66709	0.128338	0.311509	-5.74421	0	-0.994052	10.3788	-7.9308	1.81507e-05	0.000560984	3.22187	1	1	BLVRB	19	biliverdin reductase B (flavin reductase (NADPH)) [Source:HGNC Symbol;Acc:1063]
ENSG00000090097	1.8047	5.86489	7.65026	2.44413e-05	0.00106011	2.99401	1	4.43472	5.86489	18.7991	8.70322e-09	5.8971e-06	10.8634	1	2	PCBP4	3	poly(rC) binding protein 4 [Source:HGNC Symbol;Acc:8652]
ENSG00000090104	0.940344	6.24639	2.44346	0.0360287	0.132398	-4.54571	0	-1.46686	6.24639	-3.81161	0.00381139	0.0257855	-2.39774	1	1	RGS1	1	regulator of G-protein signaling 1 [Source:HGNC Symbol;Acc:9991]
ENSG00000090238	-0.80409	8.31244	-3.36415	0.00781495	0.0451101	-3.0125	1	-0.084897	8.31244	-0.355192	0.730269	0.864639	-7.14778	0	1	YPEL3	16	yippee-like 3 (Drosophila) [Source:HGNC Symbol;Acc:18327]
ENSG00000090269	0.930383	7.37411	1.63211	0.135585	0.323264	-5.79329	0	3.00081	7.37411	5.26411	0.000445719	0.00534893	-0.150954	1	1
ENSG00000090273	0.231245	9.30744	1.35688	0.206439	0.422301	-6.15748	0	-0.615821	9.30744	-3.61348	0.00522309	0.0323541	-2.72377	1	1	NUDC	1	nuclear distribution gene C homolog (A. nidulans) [Source:HGNC Symbol;Acc:8045]
ENSG00000090339	1.35127	8.8341	8.32436	1.21164e-05	0.000688894	3.721	1	1.46057	8.8341	8.9977	6.27581e-06	0.000282764	4.33267	1	2	ICAM1	19	intercellular adhesion molecule 1 [Source:HGNC Symbol;Acc:5344]
ENSG00000090487	-0.814778	10.1626	-5.91679	0.000187355	0.003755	0.867813	1	0.066914	10.1626	0.485919	0.638128	0.811729	-7.08843	0	1	SPG21	15	spastic paraplegia 21 (autosomal recessive, Mast syndrome) [Source:HGNC Symbol;Acc:20373]
ENSG00000090581	-0.0907854	9.07017	-0.879849	0.400829	0.626826	-6.67202	0	-0.638853	9.07017	-6.19146	0.00013237	0.00225667	1.1295	1	1	GNPTG	16	N-acetylglucosamine-1-phosphate transferase, gamma subunit [Source:HGNC Symbol;Acc:23026]
ENSG00000090621	-0.449221	7.49848	-2.51364	0.0320398	0.121438	-4.43058	0	-1.53441	7.49848	-8.5859	9.33878e-06	0.000373912	3.91785	1	1	PABPC4	1	poly(A) binding protein, cytoplasmic 4 (inducible form) [Source:HGNC Symbol;Acc:8557]
ENSG00000090674	-0.581364	8.60788	-4.62587	0.00110285	0.0117679	-0.986641	0	-0.769858	8.60788	-6.1257	0.000143721	0.00239313	1.04269	1	1	MCOLN1	19	mucolipin 1 [Source:HGNC Symbol;Acc:13356]
ENSG00000090686	-0.706198	7.44691	-5.84329	0.000205961	0.00396547	0.768678	1	-0.228104	7.44691	-1.8874	0.0902553	0.253617	-5.55601	0	1	USP48	1	ubiquitin specific peptidase 48 [Source:HGNC Symbol;Acc:18533]
ENSG00000090861	-0.133664	7.01717	-0.951548	0.365102	0.59292	-6.60584	0	-0.592953	7.01717	-4.2212	0.00201916	0.016103	-1.73656	1	1	AARS	16	alanyl-tRNA synthetase [Source:HGNC Symbol;Acc:20]
ENSG00000090924	0.701624	5.15215	2.96129	0.0151727	0.0717771	-3.6859	0	1.56841	5.15215	6.61966	7.85244e-05	0.00155086	1.68038	1	1	PLEKHG2	19	pleckstrin homology domain containing, family G (with RhoGef domain) member 2 [Source:HGNC Symbol;Acc:29515]
ENSG00000090932	0.0843232	4.05962	0.553267	0.592967	0.776137	-6.91509	0	0.599741	4.05962	3.93506	0.00313977	0.0223488	-2.19649	1	1	DLL3	19	delta-like 3 (Drosophila) [Source:HGNC Symbol;Acc:2909]
ENSG00000091039	0.96645	7.97845	8.46458	1.05294e-05	0.000639643	3.86595	1	0.542744	7.97845	4.75358	0.000915678	0.00900698	-0.908331	0	1	OSBPL8	12	oxysterol binding protein-like 8 [Source:HGNC Symbol;Acc:16396]
ENSG00000091073	0.685076	6.7771	3.77881	0.00401414	0.0289587	-2.3282	1	0.648178	6.7771	3.57528	0.00555319	0.0338514	-2.78701	1	2		7	Protein deltex-2 [Source:UniProtKB/Swiss-Prot;Acc:Q86UW9]
ENSG00000091127	-1.12899	5.37372	-4.29078	0.00181674	0.0165232	-1.50665	1	-0.779337	5.37372	-2.9619	0.0151574	0.0719557	-3.8131	0	1	PUS7	7	pseudouridylate synthase 7 homolog (S. cerevisiae) [Source:HGNC Symbol;Acc:26033]
ENSG00000091157	-0.593425	4.9627	-3.56243	0.00566905	0.0364762	-2.68362	1	-0.118442	4.9627	-0.711029	0.494295	0.709505	-6.94583	0	1	WDR7	18	WD repeat domain 7 [Source:HGNC Symbol;Acc:13490]
ENSG00000091317	-0.0794273	11.4847	-0.837924	0.422824	0.64835	-6.70868	0	0.612927	11.4847	6.46611	9.44442e-05	0.00177949	1.48567	1	1	CMTM6	3	CKLF-like MARVEL transmembrane domain containing 6 [Source:HGNC Symbol;Acc:19177]
ENSG00000091436	1.35678	7.35703	5.46882	0.000337471	0.00555091	0.251598	1	0.542857	7.35703	2.18811	0.0551201	0.181845	-5.0896	0	1		2	Mitogen-activated protein kinase kinase kinase MLT [Source:UniProtKB/Swiss-Prot;Acc:Q9NYL2]
ENSG00000091651	0.963105	7.16043	2.90343	0.0167057	0.0768159	-3.78273	0	1.74453	7.16043	5.25914	0.000448774	0.00536732	-0.158151	1	1	ORC6	16	origin recognition complex, subunit 6 [Source:HGNC Symbol;Acc:17151]
ENSG00000092094	-1.05347	8.04932	-8.50854	1.00798e-05	0.000621965	3.91096	1	-0.957049	8.04932	-7.72981	2.24451e-05	0.000648223	2.99891	1	2	OSGEP	14	O-sialoglycoprotein endopeptidase [Source:HGNC Symbol;Acc:18028]
ENSG00000092108	-0.723501	8.20941	-7.18677	4.07002e-05	0.00145193	2.46343	1	-0.229353	8.20941	-2.27824	0.0474598	0.163254	-4.94522	0	1	SCFD1	14	sec1 family domain containing 1 [Source:HGNC Symbol;Acc:20726]
ENSG00000092208	-0.616134	4.54279	-3.49509	0.00631913	0.0391848	-2.79503	1	-0.239642	4.54279	-1.35939	0.205671	0.429658	-6.28887	0	1	GEMIN2	14	gem (nuclear organelle) associated protein 2 [Source:HGNC Symbol;Acc:10884]
ENSG00000092529	-0.460823	5.02986	-3.11109	0.011838	0.0602918	-3.43513	0	-0.787608	5.02986	-5.31727	0.000414418	0.00507706	-0.0742424	1	1	CAPN3	15	calpain 3, (p94) [Source:HGNC Symbol;Acc:1480]
ENSG00000093072	-0.546881	5.21169	-3.11237	0.011813	0.0602207	-3.43299	0	-1.18469	5.21169	-6.7422	6.79096e-05	0.00139274	1.83353	1	1	CECR1	22	cat eye syndrome chromosome region, candidate 1 [Source:HGNC Symbol;Acc:1839]
ENSG00000095002	-0.993501	5.1707	-6.09053	0.00015022	0.00323523	1.09908	1	-0.930463	5.1707	-5.70409	0.000246901	0.00351582	0.471776	1	2	MSH2	2	mutS homolog 2, colon cancer, nonpolyposis type 1 (E. coli) [Source:HGNC Symbol;Acc:7325]
ENSG00000095066	0.631137	6.35267	2.91166	0.0164782	0.0762067	-3.76895	0	0.756251	6.35267	3.48886	0.00638307	0.0377858	-2.93051	1	1	HOOK2	19	hook homolog 2 (Drosophila) [Source:HGNC Symbol;Acc:19885]
ENSG00000095209	0.847806	6.90925	4.22334	0.00201261	0.0177725	-1.61309	1	1.49342	6.90925	7.43944	3.07329e-05	0.000812945	2.66857	1	2	TMEM38B	9	transmembrane protein 38B [Source:HGNC Symbol;Acc:25535]
ENSG00000095303	0.148087	7.19989	0.481716	0.641002	0.805987	-6.95462	0	1.11244	7.19989	3.61869	0.00517964	0.0321826	-2.71515	1	1	PTGS1	9	prostaglandin-endoperoxide synthase 1 (prostaglandin G/H synthase and cyclooxygenase) [Source:HGNC Symbol;Acc:9604]
ENSG00000095370	-0.966875	4.85008	-3.33212	0.00823405	0.0467029	-3.06585	1	-0.382777	4.85008	-1.31916	0.218281	0.445373	-6.33863	0	1	SH2D3C	9	SH2 domain containing 3C [Source:HGNC Symbol;Acc:16884]
ENSG00000095380	-0.249506	9.27156	-2.02913	0.0716401	0.212186	-5.20705	0	-0.59558	9.27156	-4.84361	0.000804293	0.00821881	-0.772078	1	1	NANS	9	N-acetylneuraminic acid synthase [Source:HGNC Symbol;Acc:19237]
ENSG00000095383	-0.866905	9.38212	-4.82992	0.00082025	0.00963678	-0.677544	1	-0.452534	9.38212	-2.52127	0.0316335	0.123212	-4.54844	0	1	TBC1D2	9	TBC1 domain family, member 2 [Source:HGNC Symbol;Acc:18026]
ENSG00000095585	-3.61325	7.8487	-21.3518	2.68967e-09	6.76914e-06	11.7297	1	-2.00043	7.8487	-11.8212	5.81964e-07	6.97447e-05	6.78119	1	2	BLNK	10	B-cell linker [Source:HGNC Symbol;Acc:14211]
ENSG00000095794	1.29646	6.77714	5.69444	0.000250046	0.00457245	0.565571	1	0.545206	6.77714	2.3947	0.0390858	0.143393	-4.75626	0	1	CREM	10	cAMP responsive element modulator [Source:HGNC Symbol;Acc:2352]
ENSG00000095951	-0.032018	7.31492	-0.149987	0.883937	0.945146	-7.06818	0	1.28094	7.31492	6.00053	0.000168349	0.00268156	0.875793	1	1	HIVEP1	6	human immunodeficiency virus type I enhancer binding protein 1 [Source:HGNC Symbol;Acc:4920]
ENSG00000095970	-0.990161	9.44227	-4.26644	0.00188499	0.0169601	-1.545	1	-1.16014	9.44227	-4.99887	0.000644878	0.00697411	-0.539811	1	2	TREM2	6	triggering receptor expressed on myeloid cells 2 [Source:HGNC Symbol;Acc:17761]
ENSG00000096060	0.0738549	5.20551	0.396907	0.700279	0.84233	-6.99472	0	0.975031	5.20551	5.23996	0.000460772	0.00545947	-0.185943	1	1	FKBP5	6	FK506 binding protein 5 [Source:HGNC Symbol;Acc:3721]
ENSG00000096384	0.631141	10.402	3.66038	0.00484558	0.0327821	-2.52222	1	-0.822641	10.402	-4.77101	0.000892884	0.00884201	-0.881857	1	2	HSP90AB1	6	heat shock protein 90kDa alpha (cytosolic), class B member 1 [Source:HGNC Symbol;Acc:5258]
ENSG00000096433	0.671487	3.78808	4.25291	0.0019241	0.0172328	-1.56635	1	0.418047	3.78808	2.64773	0.0256017	0.105825	-4.33883	0	1	ITPR3	6	inositol 1,4,5-trisphosphate receptor, type 3 [Source:HGNC Symbol;Acc:6182]
ENSG00000096968	-1.09564	7.02039	-6.59027	8.13306e-05	0.00217751	1.74091	1	-0.0728444	7.02039	-0.438158	0.671148	0.831267	-7.11217	0	1	JAK2	9	Janus kinase 2 [Source:HGNC Symbol;Acc:6192]
ENSG00000099139	2.41536	6.4232	11.0596	1.04856e-06	0.000162605	6.21392	1	1.42798	6.4232	6.53856	8.65348e-05	0.0016699	1.57793	1	2	PCSK5	9	proprotein convertase subtilisin/kexin type 5 [Source:HGNC Symbol;Acc:8747]
ENSG00000099250	0.0598765	6.42328	0.595304	0.565666	0.757475	-6.88947	0	0.965713	6.42328	9.6013	3.59679e-06	0.000202006	4.91139	1	1	NRP1	10	neuropilin 1 [Source:HGNC Symbol;Acc:8004]
ENSG00000099282	-1.14774	6.11932	-5.37481	0.000383182	0.0059845	0.118597	1	0.166628	6.11932	0.780314	0.454366	0.678758	-6.89218	0	1	TSPAN15	10	tetraspanin 15 [Source:HGNC Symbol;Acc:23298]
ENSG00000099284	-0.877357	3.30221	-5.7186	0.000242247	0.00446876	0.598753	1	-0.498095	3.30221	-3.24658	0.00947133	0.0508292	-3.3352	0	1	H2AFY2	10	H2A histone family, member Y2 [Source:HGNC Symbol;Acc:14453]
ENSG00000099308	-1.03149	6.93918	-8.02065	1.65288e-05	0.000839105	3.39977	1	-0.350736	6.93918	-2.72724	0.0224143	0.0956288	-4.20628	0	1	MAST3	19	microtubule associated serine/threonine kinase 3 [Source:HGNC Symbol;Acc:19036]
ENSG00000099330	-0.814467	5.50565	-3.64788	0.00494332	0.0331884	-2.54278	1	-0.747193	5.50565	-3.34657	0.00804219	0.0447079	-3.16781	1	2	OCEL1	19	occludin/ELL domain containing 1 [Source:HGNC Symbol;Acc:26221]
ENSG00000099331	-0.458791	6.60737	-2.51995	0.0317036	0.120683	-4.4202	0	-0.695963	6.60737	-3.82264	0.00374565	0.0254973	-2.37969	1	1	MYO9B	19	myosin IXB [Source:HGNC Symbol;Acc:7609]
ENSG00000099337	-0.981469	6.93216	-7.94234	1.79331e-05	0.000869622	3.31528	1	-0.306065	6.93216	-2.47677	0.0340777	0.130227	-4.62176	0	1	KCNK6	19	potassium channel, subfamily K, member 6 [Source:HGNC Symbol;Acc:6281]
ENSG00000099338	0.238732	3.60272	1.54463	0.155336	0.353195	-5.91345	0	1.47683	3.60272	9.55531	3.74874e-06	0.000206897	4.86847	1	1	CATSPERG	19	cation channel, sperm-associated, gamma [Source:HGNC Symbol;Acc:25243]
ENSG00000099624	-0.675341	8.63742	-5.39742	0.000371612	0.00588201	0.150698	1	-0.894437	8.63742	-7.14846	4.24979e-05	0.00100867	2.32744	1	2	ATP5D	19	ATP synthase, H+ transporting, mitochondrial F1 complex, delta subunit [Source:HGNC Symbol;Acc:837]
ENSG00000099882	1.94636	5.58172	4.69136	0.00100223	0.0110421	-0.886805	1	4.78849	5.58172	11.5418	7.19391e-07	7.96808e-05	6.5658	1	2		22
ENSG00000099889	0.656699	4.01578	3.3905	0.00748677	0.0438333	-2.96865	1	0.732657	4.01578	3.78267	0.00398969	0.0267655	-2.44513	1	2	ARVCF	22	armadillo repeat gene deleted in velocardiofacial syndrome [Source:HGNC Symbol;Acc:728]
ENSG00000099901	-0.682198	8.18814	-3.72219	0.00439118	0.0308205	-2.42079	1	0.0609883	8.18814	0.332763	0.7466	0.873537	-7.15616	0	1	RANBP1	22	RAN binding protein 1 [Source:HGNC Symbol;Acc:9847]
ENSG00000099985	1.48376	5.03744	5.13829	0.00053041	0.00724921	-0.221704	1	1.08389	5.03744	3.75351	0.00417824	0.0276826	-2.49297	1	2	OSM	22	oncostatin M [Source:HGNC Symbol;Acc:8506]
ENSG00000099991	0.722762	5.64291	4.20389	0.00207316	0.0181706	-1.64389	1	0.610074	5.64291	3.54845	0.00579809	0.0350532	-2.83151	1	2	CABIN1	22	calcineurin binding protein 1 [Source:HGNC Symbol;Acc:24187]
ENSG00000099998	-0.108463	4.06811	-0.555504	0.591497	0.775385	-6.91377	0	1.36099	4.06811	6.97048	5.20614e-05	0.00116583	2.11364	1	1	GGT5	22	gamma-glutamyltransferase 5 [Source:HGNC Symbol;Acc:4260]
ENSG00000100055	0.51179	7.28063	4.04364	0.00265205	0.0216201	-1.89946	0	0.697856	7.28063	5.51374	0.000317734	0.00422774	0.205773	1	1	CYTH4	22	cytohesin 4 [Source:HGNC Symbol;Acc:9505]
ENSG00000100060	-1.07463	5.23925	-4.49251	0.00134262	0.0135237	-1.19179	1	-1.23922	5.23925	-5.1806	0.000500144	0.00580055	-0.272295	1	2	MFNG	22	MFNG O-fucosylpeptide 3-beta-N-acetylglucosaminyltransferase [Source:HGNC Symbol;Acc:7038]
ENSG00000100077	-1.07853	8.12478	-5.72715	0.000239551	0.00443802	0.610472	1	0.345568	8.12478	1.83501	0.0982205	0.268563	-5.6343	0	1	ADRBK2	22	adrenergic, beta, receptor kinase 2 [Source:HGNC Symbol;Acc:290]
ENSG00000100084	-0.822018	6.9425	-3.35559	0.0079247	0.0455645	-3.02675	1	0.225252	6.9425	0.91951	0.380772	0.618027	-6.77138	0	1	HIRA	22	HIR histone cell cycle regulation defective homolog A (S. cerevisiae) [Source:HGNC Symbol;Acc:4916]
ENSG00000100099	-0.515806	5.80455	-2.42411	0.0372128	0.135408	-4.57734	0	-0.973287	5.80455	-4.5741	0.00119	0.0109473	-1.1833	1	1	HPS4	22	Hermansky-Pudlak syndrome 4 [Source:HGNC Symbol;Acc:15844]
ENSG00000100104	-0.764706	6.11679	-5.64871	0.000265564	0.00474969	0.502517	1	-0.173789	6.11679	-1.28374	0.229909	0.458933	-6.38157	0	1	SRRD	22	SRR1 domain containing [Source:HGNC Symbol;Acc:33910]
ENSG00000100105	-0.150291	5.68913	-0.798227	0.444396	0.666595	-6.74197	0	0.866449	5.68913	4.6019	0.00114233	0.010603	-1.14043	1	1	PATZ1	22	POZ (BTB) and AT hook containing zinc finger 1 [Source:HGNC Symbol;Acc:13071]
ENSG00000100116	0.736874	4.82243	3.27311	0.00906822	0.050023	-3.16427	0	1.7962	4.82243	7.97851	1.72688e-05	0.000550136	3.27412	1	1	GCAT	22	glycine C-acetyltransferase [Source:HGNC Symbol;Acc:4188]
ENSG00000100124	0.303198	5.97932	1.93631	0.0833679	0.234428	-5.34925	0	0.630439	5.97932	4.02617	0.00272476	0.0201395	-2.04902	1	1	ANKRD54	22	ankyrin repeat domain 54 [Source:HGNC Symbol;Acc:25185]
ENSG00000100129	-0.432261	11.105	-4.35606	0.00164632	0.0154027	-1.40417	0	-0.680332	11.105	-6.85597	5.94396e-05	0.00126927	1.97396	1	1	EIF3L	22	eukaryotic translation initiation factor 3, subunit L [Source:HGNC Symbol;Acc:18138]
ENSG00000100138	-0.683667	8.28383	-4.77479	0.000888022	0.0101586	-0.760473	1	-0.672991	8.28383	-4.70023	0.00098937	0.00955355	-0.989598	1	2	NHP2L1	22	NHP2 non-histone chromosome protein 2-like 1 (S. cerevisiae) [Source:HGNC Symbol;Acc:7819]
ENSG00000100139	1.0478	6.99522	5.01567	0.000629776	0.00815192	-0.401324	1	-0.0254861	6.99522	-0.121998	0.905464	0.957591	-7.20854	0	1	MICALL1	22	MICAL-like 1 [Source:HGNC Symbol;Acc:29804]
ENSG00000100147	1.41619	4.55166	6.45791	9.53876e-05	0.00239379	1.57424	1	1.37309	4.55166	6.2614	0.000121354	0.00211744	1.22118	1	2	CCDC134	22	coiled-coil domain containing 134 [Source:HGNC Symbol;Acc:26185]
ENSG00000100154	0.220889	5.28009	1.7386	0.114606	0.289629	-5.64215	0	0.606872	5.28009	4.77665	0.000885646	0.00878997	-0.873308	1	1	TTC28	22	tetratricopeptide repeat domain 28 [Source:HGNC Symbol;Acc:29179]
ENSG00000100220	-0.840323	8.30106	-5.69165	0.000250965	0.00457687	0.561728	1	-0.539185	8.30106	-3.65199	0.00491093	0.031019	-2.66012	0	1	C22orf28	22	chromosome 22 open reading frame 28 [Source:HGNC Symbol;Acc:26935]
ENSG00000100234	-1.05132	4.72511	-6.33277	0.00011113	0.0026521	1.41448	1	-0.342081	4.72511	-2.06057	0.0680359	0.209162	-5.29062	0	1	TIMP3	22	TIMP metallopeptidase inhibitor 3 [Source:HGNC Symbol;Acc:11822]
ENSG00000100241	0.169952	4.92134	1.44975	0.179592	0.387537	-6.03927	0	1.05674	4.92134	9.0143	6.17802e-06	0.000279789	4.34903	1	1	SBF1	22	SET binding factor 1 [Source:HGNC Symbol;Acc:10542]
ENSG00000100266	0.0797872	5.1513	0.553192	0.593016	0.776137	-6.91513	0	1.33266	5.1513	9.23976	5.00227e-06	0.000243439	4.5688	1	1	PACSIN2	22	protein kinase C and casein kinase substrate in neurons 2 [Source:HGNC Symbol;Acc:8571]
ENSG00000100271	-0.514707	4.2807	-2.33406	0.0432468	0.149799	-4.72372	0	-0.885438	4.2807	-4.01523	0.00277137	0.0204156	-2.06668	1	1	TTLL1	22	tubulin tyrosine ligase-like family, member 1 [Source:HGNC Symbol;Acc:1312]
ENSG00000100276	-0.822163	4.71945	-3.55562	0.00573156	0.0367041	-2.69488	1	-1.37948	4.71945	-5.96586	0.000175952	0.00276024	0.829187	1	2	RASL10A	22	RAS-like, family 10, member A [Source:HGNC Symbol;Acc:16954]
ENSG00000100280	-1.08472	7.23223	-5.04583	0.000603607	0.0079179	-0.356936	1	-0.892455	7.23223	-4.15148	0.00224617	0.0174244	-1.84775	1	2	AP1B1	22	adaptor-related protein complex 1, beta 1 subunit [Source:HGNC Symbol;Acc:554]
ENSG00000100284	0.615664	6.95437	3.90722	0.0032795	0.0250977	-2.11936	1	0.863618	6.95437	5.48082	0.000332071	0.00434952	0.159242	1	2	TOM1	22	target of myb1 (chicken) [Source:HGNC Symbol;Acc:11982]
ENSG00000100292	1.66877	9.87699	10.5427	1.596e-06	0.000205232	5.79192	1	-0.205178	9.87699	-1.29625	0.225745	0.453937	-6.3665	0	1	HMOX1	22	heme oxygenase (decycling) 1 [Source:HGNC Symbol;Acc:5013]
ENSG00000100300	-0.333481	9.91943	-1.1753	0.268727	0.495243	-6.37292	0	-1.61733	9.91943	-5.70001	0.000248227	0.0035233	0.466126	1	1	TSPO	22	translocator protein (18kDa) [Source:HGNC Symbol;Acc:1158]
ENSG00000100304	-0.672494	5.2607	-5.72449	0.000240387	0.00444843	0.606823	1	-0.163903	5.2607	-1.3952	0.194975	0.416921	-6.24376	0	1	TTLL12	22	tubulin tyrosine ligase-like family, member 12 [Source:HGNC Symbol;Acc:28974]
ENSG00000100347	-0.824531	8.20508	-7.23984	3.83459e-05	0.00139812	2.52551	1	-0.732667	8.20508	-6.43322	9.82911e-05	0.00182273	1.44356	1	2	SAMM50	22	sorting and assembly machinery component 50 homolog (S. cerevisiae) [Source:HGNC Symbol;Acc:24276]
ENSG00000100350	-0.509982	6.41931	-2.62896	0.0264184	0.106034	-4.24014	0	-1.346	6.41931	-6.93865	5.40066e-05	0.00119527	2.07498	1	1	FOXRED2	22	FAD-dependent oxidoreductase domain containing 2 [Source:HGNC Symbol;Acc:26264]
ENSG00000100353	-0.440528	10.02	-4.03889	0.00267158	0.0217593	-1.90707	0	-0.634971	10.02	-5.82161	0.000211823	0.00316328	0.633427	1	1	EIF3D	22	eukaryotic translation initiation factor 3, subunit D [Source:HGNC Symbol;Acc:3278]
ENSG00000100354	-0.896649	7.14352	-4.94781	0.000693206	0.0086535	-0.501664	1	-0.492769	7.14352	-2.71916	0.0227194	0.0966103	-4.21979	0	1	TNRC6B	22	trinucleotide repeat containing 6B [Source:HGNC Symbol;Acc:29190]
ENSG00000100362	-0.156944	5.2536	-0.580117	0.575448	0.764529	-6.89893	0	6.25206	5.2536	23.1097	1.29294e-09	2.53086e-06	12.5457	1	1	PVALB	22	parvalbumin [Source:HGNC Symbol;Acc:9704]
ENSG00000100364	-1.49353	8.30044	-14.9293	7.15187e-08	3.70572e-05	8.82685	1	-0.493761	8.30044	-4.93566	0.000705261	0.00745326	-0.633952	0	1	KIAA0930	22	KIAA0930 [Source:HGNC Symbol;Acc:1314]
ENSG00000100365	-1.16457	10.2467	-6.9335	5.4329e-05	0.00169401	2.16226	1	-1.05086	10.2467	-6.25653	0.000122088	0.00212389	1.21482	1	2	NCF4	22	neutrophil cytosolic factor 4, 40kDa [Source:HGNC Symbol;Acc:7662]
ENSG00000100368	-0.153088	10.2706	-1.52249	0.160722	0.361198	-5.94323	0	0.92487	10.2706	9.19806	5.19977e-06	0.000249669	4.52852	1	1	CSF2RB	22	colony stimulating factor 2 receptor, beta, low-affinity (granulocyte-macrophage) [Source:HGNC Symbol;Acc:2436]
ENSG00000100376	-0.962485	5.44171	-3.61137	0.00524076	0.0345264	-2.60288	1	-1.08657	5.44171	-4.07696	0.00251894	0.0190211	-1.96722	1	2	FAM118A	22	family with sequence similarity 118, member A [Source:HGNC Symbol;Acc:1313]
ENSG00000100418	1.11849	7.7204	9.19834	5.1984e-06	0.000431982	4.59161	1	0.559738	7.7204	4.60321	0.00114012	0.0105881	-1.1384	0	1	PPPDE2	22	PPPDE peptidase domain containing 2 [Source:HGNC Symbol;Acc:24577]
ENSG00000100442	-0.63146	6.9079	-4.6939	0.000998522	0.011015	-0.882933	1	-0.164041	6.9079	-1.21939	0.252349	0.485773	-6.45749	0	1	FKBP3	14	FK506 binding protein 3, 25kDa [Source:HGNC Symbol;Acc:3719]
ENSG00000100462	-0.811998	7.22346	-6.33079	0.000111401	0.0026521	1.41193	1	-0.438742	7.22346	-3.42068	0.00712849	0.0409464	-3.04407	0	1	PRMT5	14	protein arginine methyltransferase 5 [Source:HGNC Symbol;Acc:10894]
ENSG00000100473	0.282985	3.52538	0.861354	0.410432	0.635879	-6.68838	0	1.34991	3.52538	4.10886	0.00239809	0.0183604	-1.91599	1	1	COCH	14	coagulation factor C homolog, cochlin (Limulus polyphemus) [Source:HGNC Symbol;Acc:2180]
ENSG00000100522	0.0750261	6.27889	0.380708	0.711864	0.849714	-7.00152	0	0.949488	6.27889	4.81802	0.000834398	0.00841403	-0.81069	1	1	GNPNAT1	14	glucosamine-phosphate N-acetyltransferase 1 [Source:HGNC Symbol;Acc:19980]
ENSG00000100575	-0.77034	7.13498	-5.00582	0.000638581	0.00823563	-0.415842	1	-0.816667	7.13498	-5.30686	0.000420355	0.00513752	-0.0892291	1	2	TIMM9	14	translocase of inner mitochondrial membrane 9 homolog (yeast) [Source:HGNC Symbol;Acc:11819]
ENSG00000100592	0.048377	6.31017	0.258282	0.801744	0.901931	-7.04401	0	-0.627748	6.31017	-3.35151	0.00797764	0.0444613	-3.15955	1	1	DAAM1	14	dishevelled associated activator of morphogenesis 1 [Source:HGNC Symbol;Acc:18142]
ENSG00000100596	-0.686152	7.24378	-3.51872	0.00608258	0.0382703	-2.7559	1	-0.199625	7.24378	-1.02372	0.331539	0.571722	-6.6702	0	1	SPTLC2	14	serine palmitoyltransferase, long chain base subunit 2 [Source:HGNC Symbol;Acc:11278]
ENSG00000100600	-0.734766	12.0044	-3.79121	0.00393615	0.0286834	-2.30795	1	-2.84479	12.0044	-14.6784	8.33972e-08	2.40854e-05	8.71883	1	2	LGMN	14	legumain [Source:HGNC Symbol;Acc:9472]
ENSG00000100644	0.831437	8.93338	3.56043	0.00568735	0.0365405	-2.68693	1	0.504373	8.93338	2.15986	0.0577599	0.187464	-5.13449	0	1	HIF1A	14	hypoxia inducible factor 1, alpha subunit (basic helix-loop-helix transcription factor) [Source:HGNC Symbol;Acc:4910]
ENSG00000100647	0.84466	11.2522	7.06151	4.69063e-05	0.00154952	2.3155	1	0.718392	11.2522	6.00589	0.000167205	0.00266657	0.882989	1	2	KIAA0247	14	KIAA0247 [Source:HGNC Symbol;Acc:19956]
ENSG00000100664	0.737727	8.8134	8.26519	1.28631e-05	0.000717116	3.65921	1	0.188625	8.8134	2.11328	0.0623794	0.19726	-5.20805	0	1	EIF5	14	eukaryotic translation initiation factor 5 [Source:HGNC Symbol;Acc:3299]
ENSG00000100678	1.22874	4.86928	4.49386	0.00133993	0.0135043	-1.1897	1	1.2213	4.86928	4.46666	0.00139521	0.0123686	-1.35001	1	2	SLC8A3	14	solute carrier family 8 (sodium/calcium exchanger), member 3 [Source:HGNC Symbol;Acc:11070]
ENSG00000100697	-0.452877	8.61935	-2.66298	0.0249568	0.101657	-4.1837	0	-0.616908	8.61935	-3.62751	0.00510702	0.031857	-2.70057	1	1	DICER1	14	dicer 1, ribonuclease type III [Source:HGNC Symbol;Acc:17098]
ENSG00000100714	-2.00072	6.88935	-11.7643	6.07399e-07	0.00011631	6.75778	1	-1.29978	6.88935	-7.64276	2.46393e-05	0.000692296	2.90092	1	2	MTHFD1	14	methylenetetrahydrofolate dehydrogenase (NADP+ dependent) 1, methenyltetrahydrofolate cyclohydrolase, formyltetrahydrofolate synthetase [Source:HGNC Symbol;Acc:7432]
ENSG00000100731	0.604192	6.7599	2.81627	0.0193176	0.0850795	-3.9284	0	1.1988	6.7599	5.58785	0.000287842	0.00393093	0.30996	1	1	PCNX	14	pecanex homolog (Drosophila) [Source:HGNC Symbol;Acc:19740]
ENSG00000100744	0.258371	8.44503	1.45325	0.178641	0.386292	-6.03471	0	0.664391	8.44503	3.73697	0.0042893	0.0281327	-2.52013	1	1	C14orf129	14	chromosome 14 open reading frame 129 [Source:HGNC Symbol;Acc:20343]
ENSG00000100814	-0.968512	7.33437	-7.53945	2.7552e-05	0.00115701	2.86951	1	-1.0568	7.33437	-8.22672	1.33755e-05	0.00046443	3.54195	1	2	CCNB1IP1	14	cyclin B1 interacting protein 1, E3 ubiquitin protein ligase [Source:HGNC Symbol;Acc:19437]
ENSG00000100823	-1.48906	9.39169	-7.20133	4.0039e-05	0.00143659	2.4805	1	-1.27924	9.39169	-6.18664	0.000133168	0.0022645	1.12316	1	2	APEX1	14	APEX nuclease (multifunctional DNA repair enzyme) 1 [Source:HGNC Symbol;Acc:587]
ENSG00000100852	0.996485	6.44781	3.81305	0.00380273	0.0280304	-2.27235	1	1.06464	6.44781	4.07383	0.00253114	0.0190723	-1.97226	1	2	ARHGAP5	14	Rho GTPase activating protein 5 [Source:HGNC Symbol;Acc:675]
ENSG00000100902	0.317499	11.919	2.47715	0.0340561	0.127085	-4.49053	0	0.898934	11.919	7.01354	4.95498e-05	0.00112438	2.16573	1	1	PSMA6	14	proteasome (prosome, macropain) subunit, alpha type, 6 [Source:HGNC Symbol;Acc:9535]
ENSG00000100906	0.444772	11.977	3.40486	0.00731405	0.0430654	-2.94478	0	1.13044	11.977	8.65384	8.7369e-06	0.000353023	3.98746	1	1	NFKBIA	14	nuclear factor of kappa light polypeptide gene enhancer in B-cells inhibitor, alpha [Source:HGNC Symbol;Acc:7797]
ENSG00000100916	0.398068	4.56266	2.94258	0.0156521	0.073339	-3.71722	0	0.693205	4.56266	5.12428	0.000540856	0.0061275	-0.354691	1	1	BRMS1L	14	breast cancer metastasis-suppressor 1-like [Source:HGNC Symbol;Acc:20512]
ENSG00000100979	-0.107055	7.18511	-0.379563	0.712685	0.850463	-7.002	0	-2.08755	7.18511	-7.40139	3.20465e-05	0.000832688	2.62454	1	1	PLTP	20	phospholipid transfer protein [Source:HGNC Symbol;Acc:9093]
ENSG00000100994	0.155333	6.04577	1.73022	0.116143	0.292174	-5.65423	0	1.07974	6.04577	12.027	4.99224e-07	6.23747e-05	6.93657	1	1	PYGB	20	phosphorylase, glycogen; brain [Source:HGNC Symbol;Acc:9723]
ENSG00000100997	-2.04896	7.44836	-13.3678	1.93983e-07	6.73744e-05	7.87535	1	-1.81309	7.44836	-11.829	5.7857e-07	6.97447e-05	6.78712	1	2	ABHD12	20	abhydrolase domain containing 12 [Source:HGNC Symbol;Acc:15868]
ENSG00000101000	-0.658572	4.7077	-2.2885	0.0466564	0.158249	-4.79725	0	1.97722	4.7077	6.87072	5.8428e-05	0.00125528	1.99205	1	1	PROCR	20	protein C receptor, endothelial [Source:HGNC Symbol;Acc:9452]
ENSG00000101004	-0.221235	3.71001	-1.09444	0.300954	0.530703	-6.46149	0	-0.774841	3.71001	-3.83312	0.00368426	0.0251865	-2.36255	1	1	NINL	20	ninein-like [Source:HGNC Symbol;Acc:29163]
ENSG00000101017	1.16624	8.31383	5.2776	0.000437546	0.00645582	-0.0202855	1	1.85132	8.31383	8.37778	1.14829e-05	0.000423209	3.70169	1	2	CD40	20	CD40 molecule, TNF receptor superfamily member 5 [Source:HGNC Symbol;Acc:11919]
ENSG00000101079	-0.165318	5.09609	-1.31437	0.219823	0.439392	-6.20985	0	0.790292	5.09609	6.28328	0.000118115	0.002085	1.24972	1	1	NDRG3	20	NDRG family member 3 [Source:HGNC Symbol;Acc:14462]
ENSG00000101109	-0.733847	7.20326	-5.32536	0.000409866	0.0062475	0.0481214	1	-0.259169	7.20326	-1.88073	0.0912355	0.255532	-5.56604	0	1	STK4	20	serine/threonine kinase 4 [Source:HGNC Symbol;Acc:11408]
ENSG00000101160	-0.717904	11.0688	-4.9986	0.000645124	0.00828968	-0.426503	1	-1.06556	11.0688	-7.41924	3.14228e-05	0.000823772	2.64522	1	2	CTSZ	20	cathepsin Z [Source:HGNC Symbol;Acc:2547]
ENSG00000101166	0.599558	7.51565	5.4575	0.000342651	0.00558934	0.235648	1	0.889421	7.51565	8.09598	1.52905e-05	0.000508252	3.40172	1	2	SLMO2	20	slowmo homolog 2 (Drosophila) [Source:HGNC Symbol;Acc:15892]
ENSG00000101187	1.14875	4.67718	3.57263	0.0055769	0.036089	-2.66678	1	0.60372	4.67718	1.87757	0.0917022	0.256431	-5.57078	0	1	SLCO4A1	20	solute carrier organic anion transporter family, member 4A1 [Source:HGNC Symbol;Acc:10953]
ENSG00000101190	-1.03361	5.47383	-4.71188	0.000972749	0.0107983	-0.855634	1	-0.0678068	5.47383	-0.309107	0.763968	0.883424	-7.16443	0	1	TCFL5	20	transcription factor-like 5 (basic helix-loop-helix) [Source:HGNC Symbol;Acc:11646]
ENSG00000101236	0.992012	6.64292	7.93752	1.80237e-05	0.000869925	3.31006	1	0.669281	6.64292	5.3552	0.00039353	0.00492275	-0.0197429	1	2	RNF24	20	ring finger protein 24 [Source:HGNC Symbol;Acc:13779]
ENSG00000101265	-1.51064	9.08294	-13.4501	1.83573e-07	6.60003e-05	7.92861	1	-0.631912	9.08294	-5.62627	0.000273555	0.00379642	0.363649	1	2	RASSF2	20	Ras association (RalGDS/AF-6) domain family member 2 [Source:HGNC Symbol;Acc:9883]
ENSG00000101331	1.01744	4.41108	2.86612	0.0177767	0.0800953	-3.84512	0	1.43838	4.41108	4.05191	0.00261832	0.0194875	-2.00753	1	1	C20orf160	20	chromosome 20 open reading frame 160 [Source:HGNC Symbol;Acc:16153]
ENSG00000101336	0.554344	10.0366	3.71645	0.00443146	0.031029	-2.4302	0	1.7163	10.0366	11.5064	7.39209e-07	7.96808e-05	6.53814	1	1	HCK	20	hemopoietic cell kinase [Source:HGNC Symbol;Acc:4840]
ENSG00000101337	0.44322	5.82005	4.48253	0.00136266	0.013632	-1.20723	0	0.904102	5.82005	9.14369	5.47023e-06	0.000259228	4.47575	1	1	TM9SF4	20	transmembrane 9 superfamily protein member 4 [Source:HGNC Symbol;Acc:30797]
ENSG00000101347	-1.2031	8.36254	-8.81063	7.50384e-06	0.000535075	4.21489	1	0.264931	8.36254	1.94015	0.082849	0.239624	-5.4762	0	1	SAMHD1	20	SAM domain and HD domain 1 [Source:HGNC Symbol;Acc:15925]
ENSG00000101384	0.623108	3.7296	4.20476	0.00207041	0.0181555	-1.64251	1	0.205983	3.7296	1.38999	0.196501	0.418391	-6.25037	0	1	JAG1	20	jagged 1 [Source:HGNC Symbol;Acc:6188]
ENSG00000101391	-0.735447	7.42513	-7.49261	2.89947e-05	0.00119067	2.81645	1	-0.140504	7.42513	-1.43143	0.184637	0.40221	-6.19732	0	1	CDK5RAP1	20	CDK5 regulatory subunit associated protein 1 [Source:HGNC Symbol;Acc:15880]
ENSG00000101417	-0.651541	4.66857	-3.64326	0.00497994	0.0333961	-2.55037	1	-0.352915	4.66857	-1.97342	0.0784768	0.231214	-5.42538	0	1	PXMP4	20	peroxisomal membrane protein 4, 24kDa [Source:HGNC Symbol;Acc:15920]
ENSG00000101442	-1.1658	6.20359	-6.68889	7.23228e-05	0.00199391	1.86356	1	-0.661182	6.20359	-3.79359	0.00392137	0.0263502	-2.42723	1	2	ACTR5	20	ARP5 actin-related protein 5 homolog (yeast) [Source:HGNC Symbol;Acc:14671]
ENSG00000101444	-0.847919	5.82568	-4.18116	0.00214639	0.0186126	-1.67995	1	-2.22495	5.82568	-10.9714	1.12513e-06	0.000101269	6.10928	1	2	AHCY	20	adenosylhomocysteinase [Source:HGNC Symbol;Acc:343]
ENSG00000101452	-0.652206	3.86301	-6.47527	9.34021e-05	0.00237099	1.59623	1	-0.156691	3.86301	-1.55567	0.152709	0.356627	-6.03248	0	1	DHX35	20	DEAH (Asp-Glu-Ala-His) box polypeptide 35 [Source:HGNC Symbol;Acc:15861]
ENSG00000101460	1.64974	5.60037	5.74807	0.000233089	0.00435587	0.639108	1	2.68806	5.60037	9.36577	4.45368e-06	0.000227969	4.68956	1	2	MAP1LC3A	20	microtubule-associated protein 1 light chain 3 alpha [Source:HGNC Symbol;Acc:6838]
ENSG00000101474	-0.927328	8.20991	-4.99176	0.000651383	0.00834799	-0.436599	1	-0.246227	8.20991	-1.32543	0.216275	0.442779	-6.33094	0	1	C20orf3	20	chromosome 20 open reading frame 3 [Source:HGNC Symbol;Acc:13238]
ENSG00000101546	-1.26314	5.74397	-7.78306	2.12086e-05	0.000980076	3.1413	1	-1.70935	5.74397	-10.5324	1.60971e-06	0.0001266	5.74178	1	2	RBFA	18	ribosome binding factor A (putative) [Source:HGNC Symbol;Acc:26120]
ENSG00000101577	-0.915016	7.44341	-6.50508	9.00966e-05	0.00232929	1.63391	1	-0.508992	7.44341	-3.61855	0.00518079	0.0321826	-2.71537	0	1	LPIN2	18	lipin 2 [Source:HGNC Symbol;Acc:14450]
ENSG00000101596	-0.753863	7.60683	-3.74196	0.00425549	0.0302783	-2.38843	1	0.0338111	7.60683	0.167829	0.870266	0.94087	-7.20125	0	1	SMCHD1	18	structural maintenance of chromosomes flexible hinge domain containing 1 [Source:HGNC Symbol;Acc:29090]
ENSG00000101639	0.408127	7.31585	3.05011	0.0130941	0.0649249	-3.5372	0	0.882673	7.31585	6.5966	8.0717e-05	0.0015814	1.65134	1	1	CEP192	18	centrosomal protein 192kDa [Source:HGNC Symbol;Acc:25515]
ENSG00000101773	0.0562382	8.27006	0.350087	0.733974	0.863418	-7.01364	0	-0.772268	8.27006	-4.80743	0.000847208	0.00849475	-0.826698	1	1	RBBP8	18	retinoblastoma binding protein 8 [Source:HGNC Symbol;Acc:9891]
ENSG00000101811	-0.792703	5.00113	-3.3158	0.00845653	0.0476885	-3.09306	1	-0.13837	5.00113	-0.578788	0.576308	0.768697	-7.03564	0	1	CSTF2	X	cleavage stimulation factor, 3' pre-RNA, subunit 2, 64kDa [Source:HGNC Symbol;Acc:2484]
ENSG00000101856	0.817521	7.60204	7.28581	3.64259e-05	0.00136245	2.57901	1	-0.175446	7.60204	-1.56359	0.150849	0.35371	-6.02169	0	1	PGRMC1	X	progesterone receptor membrane component 1 [Source:HGNC Symbol;Acc:16090]
ENSG00000101888	0.805496	4.7838	4.89143	0.000751115	0.00916371	-0.585532	1	0.575868	4.7838	3.497	0.00629967	0.0374304	-2.91697	0	1	NXT2	X	nuclear transport factor 2-like export factor 2 [Source:HGNC Symbol;Acc:18151]
ENSG00000101911	-0.262157	6.92033	-1.88647	0.090391	0.2475	-5.42445	0	-0.750241	6.92033	-5.39871	0.000370958	0.00472194	0.0425088	1	1	PRPS2	X	phosphoribosyl pyrophosphate synthetase 2 [Source:HGNC Symbol;Acc:9465]
ENSG00000101935	-0.88298	6.20607	-4.55921	0.0012164	0.0125612	-1.08887	1	-0.0271342	6.20607	-0.140106	0.891526	0.950888	-7.20594	0	1	AMMECR1	X	Alport syndrome, mental retardation, midface hypoplasia and elliptocytosis chromosomal region gene 1 [Source:HGNC Symbol;Acc:467]
ENSG00000101955	-0.0923811	3.77589	-0.274557	0.789584	0.89477	-7.03928	0	-1.13726	3.77589	-3.37993	0.00761672	0.0428565	-3.11208	1	1	SRPX	X	sushi-repeat containing protein, X-linked [Source:HGNC Symbol;Acc:11309]
ENSG00000102007	0.798998	10.2748	3.92338	0.00319763	0.0246856	-2.09321	1	1.79243	10.2748	8.80152	7.57001e-06	0.000321351	4.13714	1	2	PLP2	X	proteolipid protein 2 (colonic epithelium-enriched) [Source:HGNC Symbol;Acc:9087]
ENSG00000102032	-1.02244	4.8851	-4.30992	0.00176492	0.0161772	-1.47655	1	-1.3258	4.8851	-5.5887	0.000287519	0.00392958	0.311142	1	2	RENBP	X	renin binding protein [Source:HGNC Symbol;Acc:9959]
ENSG00000102096	0.976177	4.26991	3.10645	0.0119291	0.0606333	-3.4429	0	1.64844	4.26991	5.24576	0.000457109	0.0054338	-0.177534	1	1	PIM2	X	pim-2 oncogene [Source:HGNC Symbol;Acc:8987]
ENSG00000102144	1.31096	9.91848	7.01112	4.96875e-05	0.00160343	2.25543	1	0.398337	9.91848	2.13033	0.0606483	0.193488	-5.18119	0	1	PGK1	X	phosphoglycerate kinase 1 [Source:HGNC Symbol;Acc:8896]
ENSG00000102178	-0.27863	4.42512	-2.05361	0.0688187	0.206573	-5.16911	0	-0.649649	4.42512	-4.78816	0.000871055	0.00867951	-0.855859	1	1	UBL4A	X	ubiquitin-like 4A [Source:HGNC Symbol;Acc:12505]
ENSG00000102189	-0.712587	5.59719	-5.50333	0.000322197	0.00538266	0.300094	1	-0.343066	5.59719	-2.64951	0.0255258	0.105601	-4.33588	0	1	EEA1	12	early endosome antigen 1 [Source:HGNC Symbol;Acc:3185]
ENSG00000102226	0.301981	7.24645	1.49886	0.166652	0.369575	-5.97475	0	0.872501	7.24645	4.3306	0.00171068	0.0142966	-1.56333	1	1	USP11	X	ubiquitin specific peptidase 11 [Source:HGNC Symbol;Acc:12609]
ENSG00000102265	1.59854	10.7838	16.8729	2.34568e-08	2.17494e-05	9.85613	1	2.13542	10.7838	22.5397	1.62967e-09	2.83683e-06	12.3489	1	2	TIMP1	X	TIMP metallopeptidase inhibitor 1 [Source:HGNC Symbol;Acc:11820]
ENSG00000102309	-0.724252	5.634	-4.46308	0.00140268	0.013867	-1.23739	1	-0.114466	5.634	-0.705377	0.497647	0.711553	-6.95001	0	1	PIN4	X	protein (peptidylprolyl cis/trans isomerase) NIMA-interacting, 4 (parvulin) [Source:HGNC Symbol;Acc:8992]
ENSG00000102312	0.0241637	5.65462	0.155015	0.880081	0.943089	-7.06734	0	1.28317	5.65462	8.23177	1.3307e-05	0.000463298	3.54733	1	1	PORCN	X	porcupine homolog (Drosophila) [Source:HGNC Symbol;Acc:17652]
ENSG00000102349	0.504891	3.87451	1.88669	0.0903587	0.247489	-5.42412	0	1.46089	3.87451	5.4591	0.000341913	0.00442903	0.128451	1	1	KLF8	X	Kruppel-like factor 8 [Source:HGNC Symbol;Acc:6351]
ENSG00000102393	1.30977	9.84793	8.27543	1.27303e-05	0.000711968	3.66994	1	0.215344	9.84793	1.3606	0.205304	0.429447	-6.28737	0	1	GLA	X	galactosidase, alpha [Source:HGNC Symbol;Acc:4296]
ENSG00000102445	2.23805	7.43668	8.39558	1.12799e-05	0.000660192	3.79489	1	2.5929	7.43668	9.72676	3.21549e-06	0.000193998	5.02754	1	2	KIAA0226L	13	KIAA0226-like [Source:HGNC Symbol;Acc:20420]
ENSG00000102524	-0.672301	9.56472	-3.01927	0.0137807	0.067244	-3.58884	0	-1.90025	9.56472	-8.5339	9.83003e-06	0.000382272	3.86426	1	1	TNFSF13B	13	tumor necrosis factor (ligand) superfamily, member 13b [Source:HGNC Symbol;Acc:11929]
ENSG00000102531	-0.212231	7.97175	-0.874645	0.403515	0.629202	-6.67665	0	-1.31344	7.97175	-5.41294	0.000363882	0.00465203	0.0628093	1	1	FNDC3A	13	fibronectin type III domain containing 3A [Source:HGNC Symbol;Acc:20296]
ENSG00000102575	-1.56004	10.9174	-4.28702	0.00182711	0.0165833	-1.51257	1	-1.11565	10.9174	-3.06582	0.012758	0.063159	-3.63856	0	1	ACP5	19	acid phosphatase 5, tartrate resistant [Source:HGNC Symbol;Acc:124]
ENSG00000102580	0.862661	6.19475	6.50813	8.97652e-05	0.00232929	1.63776	1	0.129532	6.19475	0.977221	0.352887	0.591965	-6.71644	0	1	DNAJC3	13	DnaJ (Hsp40) homolog, subfamily C, member 3 [Source:HGNC Symbol;Acc:9439]
ENSG00000102683	1.07575	5.22798	3.50639	0.0062048	0.038704	-2.7763	1	3.995	5.22798	13.0217	2.45501e-07	3.89222e-05	7.65067	1	2	SGCG	13	sarcoglycan, gamma (35kDa dystrophin-associated glycoprotein) [Source:HGNC Symbol;Acc:10809]
ENSG00000102755	0.6272	3.44954	4.53726	0.00125649	0.0129146	-1.12268	1	0.010882	3.44954	0.0787217	0.938901	0.972289	-7.21332	0	1	FLT1	13	fms-related tyrosine kinase 1 (vascular endothelial growth factor/vascular permeability factor receptor) [Source:HGNC Symbol;Acc:3763]
ENSG00000102763	1.05475	5.83816	3.67277	0.00475072	0.0324142	-2.50187	1	0.633047	5.83816	2.20434	0.053657	0.178392	-5.06373	0	1	KIAA0564	13	KIAA0564 [Source:HGNC Symbol;Acc:29071]
ENSG00000102780	0.373441	3.70331	1.85698	0.0948037	0.255337	-5.46854	0	0.697077	3.70331	3.46631	0.0066202	0.038889	-2.96803	1	1	DGKH	13	diacylglycerol kinase, eta [Source:HGNC Symbol;Acc:2854]
ENSG00000102796	-0.216994	4.78814	-1.85446	0.0951909	0.256144	-5.4723	0	-0.80898	4.78814	-6.91365	5.559e-05	0.00121505	2.04453	1	1	DHRS12	13	dehydrogenase/reductase (SDR family) member 12 [Source:HGNC Symbol;Acc:25832]
ENSG00000102804	2.03914	6.4757	13.34	1.97651e-07	6.73744e-05	7.85724	1	1.05461	6.4757	6.89921	5.65273e-05	0.00122611	2.02691	1	2	TSC22D1	13	TSC22 domain family, member 1 [Source:HGNC Symbol;Acc:16826]
ENSG00000102878	0.396693	4.10135	3.23019	0.0097295	0.0523946	-3.23594	0	0.645742	4.10135	5.25814	0.00044939	0.00536739	-0.159595	1	1	HSF4	16	heat shock transcription factor 4 [Source:HGNC Symbol;Acc:5227]
ENSG00000102897	1.24577	6.54403	8.79126	7.64532e-06	0.00053875	4.19568	1	0.904486	6.54403	6.38285	0.000104515	0.00189819	1.37879	1	2	LYRM1	16	LYR motif containing 1 [Source:HGNC Symbol;Acc:25074]
ENSG00000102900	-0.783408	8.82843	-5.49258	0.000326873	0.00543727	0.285009	1	0.187117	8.82843	1.3119	0.220622	0.447982	-6.34749	0	1	NUP93	16	nucleoporin 93kDa [Source:HGNC Symbol;Acc:28958]
ENSG00000102908	1.23101	7.42862	6.43537	9.8034e-05	0.00244627	1.54562	1	1.05675	7.42862	5.52437	0.000313249	0.00418385	0.220765	1	2	NFAT5	16	nuclear factor of activated T-cells 5, tonicity-responsive [Source:HGNC Symbol;Acc:7774]
ENSG00000102921	0.46583	8.57554	3.22031	0.0098886	0.0530312	-3.25244	0	1.39369	8.57554	9.63464	3.49086e-06	0.000201192	4.94239	1	1	N4BP1	16	NEDD4 binding protein 1 [Source:HGNC Symbol;Acc:29850]
ENSG00000102924	0.367486	3.58015	2.7206	0.0226648	0.0950001	-4.08792	0	1.15471	3.58015	8.5486	9.68835e-06	0.000378447	3.87944	1	1	CBLN1	16	cerebellin 1 precursor [Source:HGNC Symbol;Acc:1543]
ENSG00000102962	-0.129459	5.49799	-0.600155	0.562561	0.755499	-6.88641	0	0.785416	5.49799	3.6411	0.00499722	0.0313699	-2.67812	1	1	CCL22	16	chemokine (C-C motif) ligand 22 [Source:HGNC Symbol;Acc:10621]
ENSG00000103005	0.118103	6.50293	1.02575	0.330628	0.560436	-6.53289	0	0.949744	6.50293	8.24874	1.30796e-05	0.000458097	3.56538	1	1	C16orf57	16	chromosome 16 open reading frame 57 [Source:HGNC Symbol;Acc:25792]
ENSG00000103047	-0.801117	5.03301	-6.93391	5.43029e-05	0.00169401	2.16276	1	-0.121651	5.03301	-1.05292	0.318634	0.559213	-6.64027	0	1	TMCO7	16	transmembrane and coiled-coil domains 7 [Source:HGNC Symbol;Acc:25749]
ENSG00000103064	-0.684305	4.88678	-3.65904	0.00485596	0.0328397	-2.52443	1	-0.133564	4.88678	-0.714178	0.492434	0.707769	-6.94349	0	1	SLC7A6	16	solute carrier family 7 (amino acid transporter light chain, y+L system), member 6 [Source:HGNC Symbol;Acc:11064]
ENSG00000103066	-0.637932	4.25189	-3.26325	0.00921591	0.05061	-3.18073	0	-0.799225	4.25189	-4.08832	0.00247519	0.0187711	-1.94897	1	1	PLA2G15	16	phospholipase A2, group XV [Source:HGNC Symbol;Acc:17163]
ENSG00000103121	-0.598313	8.25949	-4.89324	0.000749177	0.00916371	-0.582832	1	-0.375111	8.25949	-3.0678	0.0127162	0.063016	-3.63524	0	1	C16orf61	16	chromosome 16 open reading frame 61 [Source:HGNC Symbol;Acc:24447]
ENSG00000103194	-0.374446	5.69798	-1.7992	0.104036	0.271582	-5.55397	0	0.821179	5.69798	3.94574	0.00308787	0.0220775	-2.17917	1	1	USP10	16	ubiquitin specific peptidase 10 [Source:HGNC Symbol;Acc:12608]
ENSG00000103196	0.96998	4.38653	5.81683	0.000213137	0.00407692	0.732812	1	1.05689	4.38653	6.33805	0.000110412	0.0019845	1.32088	1	2	CRISPLD2	16	cysteine-rich secretory protein LCCL domain containing 2 [Source:HGNC Symbol;Acc:25248]
ENSG00000103222	0.564792	9.44027	3.52742	0.00599782	0.0378587	-2.7415	0	0.705162	9.44027	4.40411	0.00153178	0.0132087	-1.44778	1	1	ABCC1	16	ATP-binding cassette, sub-family C (CFTR/MRP), member 1 [Source:HGNC Symbol;Acc:51]
ENSG00000103241	0.193896	3.84714	0.791655	0.448037	0.668933	-6.74734	0	1.03481	3.84714	4.22503	0.00200742	0.0160603	-1.73047	1	1	FOXF1	16	forkhead box F1 [Source:HGNC Symbol;Acc:3809]
ENSG00000103253	-0.336668	4.60877	-1.45863	0.177188	0.383929	-6.0277	0	-0.80673	4.60877	-3.4952	0.00631794	0.0374758	-2.91995	1	1	HAGHL	16	hydroxyacylglutathione hydrolase-like [Source:HGNC Symbol;Acc:14177]
ENSG00000103254	-0.802627	6.4695	-5.31416	0.000416182	0.00629263	0.0321139	1	-0.194305	6.4695	-1.28649	0.22899	0.457851	-6.37827	0	1	FAM173A	16	family with sequence similarity 173, member A [Source:HGNC Symbol;Acc:14152]
ENSG00000103257	1.43461	5.6625	6.06829	0.000154494	0.00330343	1.06971	1	0.559391	5.6625	2.36618	0.0409912	0.147828	-4.80275	0	1	SLC7A5	16	solute carrier family 7 (amino acid transporter light chain, L system), member 5 [Source:HGNC Symbol;Acc:11063]
ENSG00000103269	0.071041	4.34136	0.585485	0.571979	0.762221	-6.89561	0	0.724476	4.34136	5.97077	0.000174853	0.00274544	0.835798	1	1	RHBDL1	16	rhomboid, veinlet-like 1 (Drosophila) [Source:HGNC Symbol;Acc:10007]
ENSG00000103274	-0.509526	8.32519	-4.96274	0.000678686	0.00853419	-0.479532	0	-0.731689	8.32519	-7.12658	4.35628e-05	0.001026	2.30138	1	1	NUBP1	16	nucleotide binding protein 1 [Source:HGNC Symbol;Acc:8041]
ENSG00000103316	1.14613	4.18956	4.85185	0.000794855	0.00946786	-0.644683	1	0.179286	4.18956	0.758958	0.466443	0.688104	-6.90919	0	1	CRYM	16	crystallin, mu [Source:HGNC Symbol;Acc:2418]
ENSG00000103319	-1.60328	7.7008	-5.94307	0.000181153	0.00368094	0.903061	1	-0.567103	7.7008	-2.10214	0.0635358	0.199485	-5.22557	0	1	EEF2K	16	eukaryotic elongation factor-2 kinase [Source:HGNC Symbol;Acc:24615]
ENSG00000103335	0.269611	7.50456	1.33395	0.213572	0.431054	-6.18587	0	-0.940918	7.50456	-4.65537	0.00105625	0.0100259	-1.05825	1	1	PIEZO1	16	piezo-type mechanosensitive ion channel component 1 [Source:HGNC Symbol;Acc:28993]
ENSG00000103342	-0.822731	7.62438	-5.30174	0.00042331	0.00634676	0.0143388	1	-0.254705	7.62438	-1.64134	0.133638	0.327988	-5.91414	0	1	GSPT1	16	G1 to S phase transition 1 [Source:HGNC Symbol;Acc:4621]
ENSG00000103356	-0.697072	4.30869	-4.04099	0.00266295	0.021699	-1.90371	1	-0.696746	4.30869	-4.0391	0.00267074	0.0197857	-2.02817	1	2	EARS2	16	glutamyl-tRNA synthetase 2, mitochondrial (putative) [Source:HGNC Symbol;Acc:29419]
ENSG00000103365	-1.38664	6.96539	-11.5824	6.97388e-07	0.000124339	6.62068	1	-1.69349	6.96539	-14.1455	1.16535e-07	2.81233e-05	8.39039	1	2	GGA2	16	golgi-associated, gamma adaptin ear containing, ARF binding protein 2 [Source:HGNC Symbol;Acc:16064]
ENSG00000103381	-0.833957	7.1622	-3.92635	0.0031828	0.0246254	-2.0884	1	-0.128224	7.1622	-0.603692	0.560303	0.757478	-7.02003	0	1	CPPED1	16	calcineurin-like phosphoesterase domain containing 1 [Source:HGNC Symbol;Acc:25632]
ENSG00000103404	-1.16681	5.40569	-6.00497	0.000167401	0.00348593	0.985722	1	-1.15748	5.40569	-5.95695	0.000177967	0.00278688	0.817173	1	2	USP31	16	ubiquitin specific peptidase 31 [Source:HGNC Symbol;Acc:20060]
ENSG00000103415	-0.726612	5.63089	-6.81608	6.22703e-05	0.00179251	2.01986	1	-0.288559	5.63089	-2.70687	0.023191	0.0981162	-4.2403	0	1	HMOX2	16	heme oxygenase (decycling) 2 [Source:HGNC Symbol;Acc:5014]
ENSG00000103423	-0.909873	5.18242	-4.96578	0.000675767	0.00853419	-0.475027	1	-0.240738	5.18242	-1.31387	0.219986	0.447207	-6.34509	0	1	DNAJA3	16	DnaJ (Hsp40) homolog, subfamily A, member 3 [Source:HGNC Symbol;Acc:11808]
ENSG00000103479	-0.892693	5.87912	-6.09825	0.000148767	0.00321942	1.10926	1	0.0573004	5.87912	0.391435	0.704183	0.850106	-7.13311	0	1	RBL2	16	retinoblastoma-like 2 (p130) [Source:HGNC Symbol;Acc:9894]
ENSG00000103490	-1.32395	8.53087	-6.23278	0.000125737	0.00286191	1.28527	1	-1.50302	8.53087	-7.07577	4.61503e-05	0.00106837	2.2406	1	2	PYCARD	16	PYD and CARD domain containing [Source:HGNC Symbol;Acc:16608]
ENSG00000103522	-1.83832	5.91277	-6.91386	5.55766e-05	0.0017065	2.13857	1	0.35001	5.91277	1.31638	0.219175	0.446381	-6.34202	0	1	IL21R	16	interleukin 21 receptor [Source:HGNC Symbol;Acc:6006]
ENSG00000103540	-0.731809	6.15258	-4.05386	0.00261042	0.0213986	-1.88306	1	-0.441704	6.15258	-2.44682	0.0358272	0.134635	-4.67096	0	1	CCP110	16	centriolar coiled coil protein 110kDa [Source:HGNC Symbol;Acc:24342]
ENSG00000103550	-1.13419	6.19223	-4.94138	0.000699557	0.00870219	-0.511199	1	-1.65401	6.19223	-7.20606	3.98268e-05	0.000967763	2.39579	1	2	C16orf88	16	chromosome 16 open reading frame 88 [Source:HGNC Symbol;Acc:34404]
ENSG00000103569	2.33546	6.11043	15.1067	6.42489e-08	3.42992e-05	8.92746	1	3.15134	6.11043	20.3842	4.12825e-09	4.05405e-06	11.5373	1	2	AQP9	15	aquaporin 9 [Source:HGNC Symbol;Acc:643]
ENSG00000103653	-0.728471	7.39862	-6.23991	0.000124629	0.00284432	1.29454	1	-0.110292	7.39862	-0.944732	0.368396	0.607396	-6.74771	0	1	CSK	15	c-src tyrosine kinase [Source:HGNC Symbol;Acc:2444]
ENSG00000103657	-0.753355	5.4397	-3.7526	0.00418427	0.0299044	-2.37102	1	0.0636741	5.4397	0.317172	0.75803	0.880014	-7.16168	0	1	HERC1	15	hect (homologous to the E6-AP (UBE3A) carboxyl terminus) domain and RCC1 (CHC1)-like domain (RLD) 1 [Source:HGNC Symbol;Acc:4867]
ENSG00000103855	0.175401	5.20296	0.81697	0.43412	0.657511	-6.72643	0	0.85057	5.20296	3.96173	0.00301181	0.0216833	-2.15323	1	1	CD276	15	CD276 molecule [Source:HGNC Symbol;Acc:19137]
ENSG00000103888	3.60676	5.24489	11.1124	1.00553e-06	0.000158165	6.25584	1	-0.00029616	5.24489	-0.000912464	0.999291	0.999859	-7.21673	0	1	KIAA1199	15	KIAA1199 [Source:HGNC Symbol;Acc:29213]
ENSG00000103932	-0.33845	6.33679	-2.09255	0.0645483	0.198149	-5.10841	0	-0.638985	6.33679	-3.95067	0.0030642	0.0219651	-2.17117	1	1	RPAP1	15	RNA polymerase II associated protein 1 [Source:HGNC Symbol;Acc:24567]
ENSG00000103995	-0.0559645	6.87354	-0.319907	0.756021	0.875528	-7.02462	0	0.733653	6.87354	4.19373	0.00210555	0.0166192	-1.78029	1	1	CEP152	15	centrosomal protein 152kDa [Source:HGNC Symbol;Acc:29298]
ENSG00000104067	0.416685	3.62967	3.56945	0.00560548	0.0361993	-2.67203	0	0.884193	3.62967	7.57425	2.6531e-05	0.000731217	2.82317	1	1	TJP1	15	tight junction protein 1 (zona occludens 1) [Source:HGNC Symbol;Acc:11827]
ENSG00000104093	-0.186671	9.24632	-1.38594	0.197693	0.410752	-6.12104	0	0.804271	9.24632	5.9713	0.000174736	0.00274544	0.836506	1	1	DMXL2	15	Dmx-like 2 [Source:HGNC Symbol;Acc:2938]
ENSG00000104218	-0.764655	6.22291	-4.81978	0.000832291	0.00971247	-0.692768	1	-0.808006	6.22291	-5.09303	0.000564971	0.00632746	-0.400608	1	2	CSPP1	8	centrosome and spindle pole associated protein 1 [Source:HGNC Symbol;Acc:26193]
ENSG00000104267	0.553897	8.36882	4.06686	0.0025585	0.0211214	-1.86223	0	1.41378	8.36882	10.3803	1.82789e-06	0.000136449	5.61098	1	1	CA2	8	carbonic anhydrase II [Source:HGNC Symbol;Acc:1373]
ENSG00000104299	-0.700525	6.93907	-5.11313	0.00054933	0.00741574	-0.258373	1	-0.0886544	6.93907	-0.647089	0.533024	0.737657	-6.99136	0	1	INTS9	8	integrator complex subunit 9 [Source:HGNC Symbol;Acc:25592]
ENSG00000104312	1.60581	8.33901	6.50074	9.05694e-05	0.00232929	1.62843	1	0.185172	8.33901	0.749625	0.471786	0.692679	-6.91649	0	1	RIPK2	8	receptor-interacting serine-threonine kinase 2 [Source:HGNC Symbol;Acc:10020]
ENSG00000104341	1.76672	6.13733	7.6061	2.56326e-05	0.00110139	2.94456	1	4.15	6.13733	17.8666	1.38881e-08	9.06173e-06	10.4318	1	2	LAPTM4B	8	lysosomal protein transmembrane 4 beta [Source:HGNC Symbol;Acc:13646]
ENSG00000104361	-0.397477	3.85533	-2.73819	0.022008	0.0932005	-4.05862	0	-0.64593	3.85533	-4.44977	0.00143077	0.0125974	-1.37637	1	1	NIPAL2	8	NIPA-like domain containing 2 [Source:HGNC Symbol;Acc:25854]
ENSG00000104408	-0.32392	10.3597	-2.19375	0.0546076	0.176388	-4.94881	0	-0.585678	10.3597	-3.96651	0.00298945	0.0215929	-2.14548	1	1	EIF3E	8	eukaryotic translation initiation factor 3, subunit E [Source:HGNC Symbol;Acc:3277]
ENSG00000104419	0.651267	3.68157	7.23832	3.84111e-05	0.00139812	2.52374	1	0.363721	3.68157	4.04248	0.0026568	0.019699	-2.02272	0	1	NDRG1	8	N-myc downstream regulated 1 [Source:HGNC Symbol;Acc:7679]
ENSG00000104427	-0.395372	6.13851	-1.6718	0.12739	0.310275	-5.73756	0	-1.16834	6.13851	-4.94025	0.000700683	0.00740932	-0.627103	1	1	FAM164A	8	family with sequence similarity 164, member A [Source:HGNC Symbol;Acc:24277]
ENSG00000104450	0.574451	4.3982	3.19031	0.0103887	0.0548614	-3.3026	0	1.09054	4.3982	6.05647	0.00015682	0.00254158	0.950649	1	1	SPAG1	8	sperm associated antigen 1 [Source:HGNC Symbol;Acc:11212]
ENSG00000104613	-0.592792	7.99823	-5.09184	0.000565908	0.00759815	-0.289478	1	-0.220976	7.99823	-1.89809	0.0887059	0.250799	-5.53992	0	1	INTS10	8	integrator complex subunit 10 [Source:HGNC Symbol;Acc:25548]
ENSG00000104626	-0.810508	6.2527	-5.44295	0.000349434	0.0056425	0.215125	1	-0.344571	6.2527	-2.31396	0.0447199	0.156833	-4.88753	0	1	ERI1	8	exoribonuclease 1 [Source:HGNC Symbol;Acc:23994]
ENSG00000104643	0.608865	5.41314	4.62207	0.00110901	0.0118122	-0.992456	1	0.416507	5.41314	3.16182	0.0108875	0.0564465	-3.47735	0	1	MTMR9	8	myotubularin related protein 9 [Source:HGNC Symbol;Acc:14596]
ENSG00000104660	-0.961871	7.46306	-5.00169	0.000642312	0.0082656	-0.421935	1	-0.0863057	7.46306	-0.448786	0.663732	0.827369	-7.10709	0	1	LEPROTL1	8	leptin receptor overlapping transcript-like 1 [Source:HGNC Symbol;Acc:6555]
ENSG00000104722	2.31206	4.47193	6.50438	9.01729e-05	0.00232929	1.63302	1	0.927316	4.47193	2.60876	0.0273265	0.110766	-4.4036	0	1	NEFM	8	neurofilament, medium polypeptide [Source:HGNC Symbol;Acc:7734]
ENSG00000104725	0.0427834	4.1805	0.137648	0.893416	0.950901	-7.07012	0	4.31932	4.1805	13.8967	1.36781e-07	2.93861e-05	8.2323	1	1	NEFL	8	neurofilament, light polypeptide [Source:HGNC Symbol;Acc:7739]
ENSG00000104731	-0.932737	6.67461	-4.41505	0.0015069	0.0145943	-1.31204	1	-0.768965	6.67461	-3.63985	0.00500718	0.0314031	-2.68017	1	2	KLHDC4	16	kelch domain containing 4 [Source:HGNC Symbol;Acc:25272]
ENSG00000104763	-0.547356	10.525	-3.62156	0.00515591	0.0342108	-2.5861	0	-1.14186	10.525	-7.55506	2.7089e-05	0.000737599	2.80129	1	1	ASAH1	8	N-acylsphingosine amidohydrolase (acid ceramidase) 1 [Source:HGNC Symbol;Acc:735]
ENSG00000104765	1.09476	10.6785	6.66845	7.40961e-05	0.00202694	1.83825	1	0.242796	10.6785	1.47893	0.171803	0.384038	-6.1353	0	1	BNIP3L	8	BCL2/adenovirus E1B 19kDa interacting protein 3-like [Source:HGNC Symbol;Acc:1085]
ENSG00000104774	-0.170172	10.5976	-1.08158	0.30635	0.536906	-6.47514	0	-0.676805	10.5976	-4.30163	0.00178716	0.0147537	-1.60905	1	1	MAN2B1	19	mannosidase, alpha, class 2B, member 1 [Source:HGNC Symbol;Acc:6826]
ENSG00000104783	0.678376	8.34524	2.25213	0.0495654	0.164909	-4.85565	0	1.34928	8.34524	4.47946	0.00136889	0.0121674	-1.33006	1	1	KCNN4	19	potassium intermediate/small conductance calcium-activated channel, subfamily N, member 4 [Source:HGNC Symbol;Acc:6293]
ENSG00000104812	1.66692	4.51744	17.7519	1.47326e-08	1.52673e-05	10.2735	1	0.336881	4.51744	3.58764	0.00544406	0.0334058	-2.76654	0	1	GYS1	19	glycogen synthase 1 (muscle) [Source:HGNC Symbol;Acc:4706]
ENSG00000104814	-0.635294	3.93568	-4.0847	0.00248905	0.0206643	-1.83368	1	-0.422566	3.93568	-2.71693	0.0228039	0.096874	-4.2235	0	1	MAP4K1	19	mitogen-activated protein kinase kinase kinase kinase 1 [Source:HGNC Symbol;Acc:6863]
ENSG00000104823	-0.32513	7.8264	-2.1642	0.0573468	0.182295	-4.99568	0	-0.585566	7.8264	-3.89776	0.00332848	0.0233897	-2.25714	1	1	ECH1	19	enoyl CoA hydratase 1, peroxisomal [Source:HGNC Symbol;Acc:3149]
ENSG00000104856	0.454021	7.8217	3.06114	0.0128571	0.0641654	-3.51874	0	0.849291	7.8217	5.72616	0.000239861	0.00344942	0.502288	1	1	CLPTM1	19	cleft lip and palate associated transmembrane protein 1 [Source:HGNC Symbol;Acc:2087]
ENSG00000104880	-0.73305	8.57128	-4.13165	0.00231555	0.0195744	-1.75872	1	-0.70296	8.57128	-3.96206	0.00301028	0.0216811	-2.1527	1	2	CKM	19	creatine kinase, muscle [Source:HGNC Symbol;Acc:1994]
ENSG00000104885	0.970297	6.72841	4.38175	0.001584	0.0150029	-1.364	1	0.0239921	6.72841	0.108345	0.915995	0.961823	-7.21027	0	1	ERCC2	19	excision repair cross-complementing rodent repair deficiency, complementation group 2 [Source:HGNC Symbol;Acc:3434]
ENSG00000104888	0.0886515	3.65749	0.63364	0.541394	0.740249	-6.8646	0	1.57414	3.65749	11.2512	9.01254e-07	8.84243e-05	6.33609	1	1	DOT1L	19	DOT1-like, histone H3 methyltransferase (S. cerevisiae) [Source:HGNC Symbol;Acc:24948]
ENSG00000104894	-0.449591	7.54289	-2.59416	0.0280022	0.110588	-4.29775	0	-1.3162	7.54289	-7.59453	2.59552e-05	0.00071895	2.84623	1	1	KLC3	19	kinesin light chain 3 [Source:HGNC Symbol;Acc:20717]
ENSG00000104897	-0.592722	4.60983	-3.59632	0.00536878	0.0350897	-2.6277	1	-0.319588	4.60983	-1.93909	0.0829928	0.239961	-5.47782	0	1	CD37	19	CD37 molecule [Source:HGNC Symbol;Acc:1666]
ENSG00000104903	-1.18936	6.14032	-5.44937	0.00034642	0.00562759	0.224193	1	-1.58214	6.14032	-7.24901	3.79541e-05	0.000935158	2.44649	1	2	DKKL1	19	dickkopf-like 1 [Source:HGNC Symbol;Acc:16528]
ENSG00000104907	-1.21527	5.07016	-5.24418	0.000458101	0.00663681	-0.0683343	1	-1.23785	5.07016	-5.34161	0.00040088	0.00498047	-0.0392448	1	2	OAZ1	19	ornithine decarboxylase antizyme 1 [Source:HGNC Symbol;Acc:8095]
ENSG00000104915	-0.948398	7.20294	-8.13733	1.46543e-05	0.000779987	3.52438	1	-0.375463	7.20294	-3.22151	0.00986927	0.0523065	-3.37723	0	1	TRMT1	19	TRM1 tRNA methyltransferase 1 homolog (S. cerevisiae) [Source:HGNC Symbol;Acc:25980]
ENSG00000104918	0.0644655	4.46446	0.110038	0.914688	0.961001	-7.07387	0	2.07095	4.46446	3.53496	0.00592541	0.0357004	-2.85389	1	1	STX10	19	syntaxin 10 [Source:HGNC Symbol;Acc:11428]
ENSG00000104951	-0.206755	10.2024	-0.989804	0.347012	0.577326	-6.56879	0	1.94756	10.2024	9.32363	4.62943e-06	0.000232355	4.64934	1	1	TBC1D17	19	TBC1 domain family, member 17 [Source:HGNC Symbol;Acc:25699]
ENSG00000104960	0.848987	7.62986	8.10905	1.50863e-05	0.000795736	3.49431	1	0.154977	7.62986	1.48025	0.171457	0.383611	-6.13356	0	1	CCDC130	19	coiled-coil domain containing 130 [Source:HGNC Symbol;Acc:28118]
ENSG00000104972	-0.0975212	7.64319	-0.673666	0.516711	0.722521	-6.83712	0	1.55258	7.64319	10.7251	1.37347e-06	0.000114387	5.90483	1	1	KIR3DX1	19	killer cell immunoglobulin-like receptor, three domains, X1 [Source:HGNC Symbol;Acc:25043]
ENSG00000104980	-1.05794	5.38107	-4.81494	0.000838104	0.0097458	-0.70004	1	-0.733781	5.38107	-3.33961	0.00813394	0.0450615	-3.17944	1	2	C19orf53	19	chromosome 19 open reading frame 53 [Source:HGNC Symbol;Acc:24991]
ENSG00000104998	-1.20557	5.54042	-9.2951	4.75272e-06	0.00040645	4.68336	1	-0.502229	5.54042	-3.87225	0.00346439	0.0240853	-2.29869	0	1	CCDC61	19	coiled-coil domain containing 61 [Source:HGNC Symbol;Acc:33629]
ENSG00000105048	0.257385	5.86677	0.998609	0.342944	0.573537	-6.56009	0	1.0771	5.86677	4.17896	0.00215363	0.0168699	-1.80385	1	1	ASF1B	19	ASF1 anti-silencing function 1 homolog B (S. cerevisiae) [Source:HGNC Symbol;Acc:20996]
ENSG00000105122	0.565212	7.0933	1.21021	0.255688	0.480774	-6.33321	0	1.89847	7.0933	4.06494	0.0025661	0.0192288	-1.98655	1	1	OLFM2	19	olfactomedin 2 [Source:HGNC Symbol;Acc:17189]
ENSG00000105135	-0.184264	5.28951	-1.31796	0.218667	0.438055	-6.20548	0	-1.00781	5.28951	-7.2084	3.97222e-05	0.000966556	2.39856	1	1	EPHX3	19	epoxide hydrolase 3 [Source:HGNC Symbol;Acc:23760]
ENSG00000105173	1.78446	5.79261	10.755	1.34026e-06	0.000181933	5.9677	1	1.55353	5.79261	9.36315	4.46439e-06	0.000227969	4.68707	1	2	POP4	19	processing of precursor 4, ribonuclease P/MRP subunit (S. cerevisiae) [Source:HGNC Symbol;Acc:30081]
ENSG00000105176	-0.947506	7.20871	-8.51074	1.00579e-05	0.000621965	3.91321	1	-1.07833	7.20871	-9.68582	3.33482e-06	0.000198351	4.98979	1	2	CCNE1	19	cyclin E1 [Source:HGNC Symbol;Acc:1589]
ENSG00000105197	-0.623934	6.09966	-4.15751	0.00222549	0.0190786	-1.71753	1	-0.291718	6.09966	-1.94383	0.0823543	0.238748	-5.47059	0	1	RPS16	19	ribosomal protein S16 [Source:HGNC Symbol;Acc:10396]
ENSG00000105202	-0.721381	8.89283	-4.71366	0.000970237	0.0107772	-0.852934	1	-1.27496	8.89283	-8.33089	1.2037e-05	0.000436329	3.65236	1	2	LGALS13	19	lectin, galactoside-binding, soluble, 13 [Source:HGNC Symbol;Acc:15449]
ENSG00000105220	0.888213	9.66916	4.83042	0.000819659	0.00963678	-0.676789	1	0.0278695	9.66916	0.151565	0.882727	0.946097	-7.2041	0	1	GPI	19	glucose-6-phosphate isomerase [Source:HGNC Symbol;Acc:4458]
ENSG00000105246	1.52891	7.69738	7.31169	3.53914e-05	0.00134575	2.60901	1	1.73563	7.69738	8.30029	1.24143e-05	0.000442692	3.62005	1	2	EBI3	19	Epstein-Barr virus induced 3 [Source:HGNC Symbol;Acc:3129]
ENSG00000105281	-0.737869	5.01447	-3.06378	0.012801	0.0640124	-3.51431	0	-1.64992	5.01447	-6.85079	5.97989e-05	0.00127537	1.96761	1	1	SLC1A5	19	solute carrier family 1 (neutral amino acid transporter), member 5 [Source:HGNC Symbol;Acc:10943]
ENSG00000105339	1.38304	6.2795	10.4759	1.68725e-06	0.00021081	5.73585	1	0.769721	6.2795	5.8303	0.000209451	0.00314569	0.64531	1	2	DENND3	8	DENN/MADD domain containing 3 [Source:HGNC Symbol;Acc:29134]
ENSG00000105352	0.127085	4.64833	0.444826	0.666491	0.823238	-6.97298	0	1.25044	4.64833	4.37683	0.00159573	0.0136136	-1.49057	1	1	CEACAM4	19	carcinoembryonic antigen-related cell adhesion molecule 4 [Source:HGNC Symbol;Acc:1816]
ENSG00000105364	-0.762313	5.17791	-7.14206	4.28062e-05	0.00149251	2.41086	1	-0.0890067	5.17791	-0.833898	0.424978	0.655591	-6.84769	0	1	MRPL4	19	mitochondrial ribosomal protein L4 [Source:HGNC Symbol;Acc:14276]
ENSG00000105373	-0.469083	12.0294	-3.35104	0.0079837	0.0457692	-3.03433	0	-0.71537	12.0294	-5.11047	0.000551374	0.00620501	-0.374965	1	1	GLTSCR2	19	glioma tumor suppressor candidate region gene 2 [Source:HGNC Symbol;Acc:4333]
ENSG00000105376	1.93858	4.99047	8.3139	1.22449e-05	0.000693283	3.71011	1	1.10671	4.99047	4.74629	0.000925391	0.00909744	-0.919411	1	2	ICAM5	19	intercellular adhesion molecule 5, telencephalin [Source:HGNC Symbol;Acc:5348]
ENSG00000105486	0.516721	5.33248	1.6675	0.128256	0.311401	-5.74364	0	1.2001	5.33248	3.87281	0.00346133	0.0240736	-2.29778	1	1	LIG1	19	ligase I, DNA, ATP-dependent [Source:HGNC Symbol;Acc:6598]
ENSG00000105499	0.59782	6.62137	4.38976	0.00156507	0.0149052	-1.35148	1	0.423173	6.62137	3.10734	0.0119114	0.0602056	-3.56882	0	1	PLA2G4C	19	phospholipase A2, group IVC (cytosolic, calcium-independent) [Source:HGNC Symbol;Acc:9037]
ENSG00000105516	-1.01094	5.42663	-3.95539	0.00304175	0.0238162	-2.04148	1	-2.16184	5.42663	-8.45843	1.0594e-05	0.000400504	3.78599	1	2	DBP	19	D site of albumin promoter (albumin D-box) binding protein [Source:HGNC Symbol;Acc:2697]
ENSG00000105609	-1.03627	4.49626	-6.43665	9.78819e-05	0.00244594	1.54725	1	-1.28122	4.49626	-7.95816	1.7639e-05	0.000556894	3.25187	1	2	LILRB5	19	leukocyte immunoglobulin-like receptor, subfamily B (with TM and ITIM domains), member 5 [Source:HGNC Symbol;Acc:6609]
ENSG00000105612	-1.86134	9.70518	-8.68075	8.51044e-06	0.000572246	4.08536	1	-1.99417	9.70518	-9.30023	4.73029e-06	0.000233674	4.62693	1	2	DNASE2	19	deoxyribonuclease II, lysosomal [Source:HGNC Symbol;Acc:2960]
ENSG00000105643	-0.0708807	9.7751	-0.541008	0.60106	0.780315	-6.92223	0	-0.717988	9.7751	-5.48015	0.00033237	0.00435019	0.158295	1	1	ARRDC2	19	arrestin domain containing 2 [Source:HGNC Symbol;Acc:25225]
ENSG00000105649	0.280576	3.89225	1.98416	0.0771119	0.222811	-5.27628	0	0.841128	3.89225	5.94824	0.000179959	0.00280065	0.80543	1	1	RAB3A	19	RAB3A, member RAS oncogene family [Source:HGNC Symbol;Acc:9777]
ENSG00000105656	0.842186	4.43271	4.81564	0.000837255	0.0097458	-0.698981	1	0.139012	4.43271	0.794875	0.446251	0.671912	-6.88034	0	1	ELL	19	elongation factor RNA polymerase II [Source:HGNC Symbol;Acc:23114]
ENSG00000105664	-0.0782454	3.83606	-0.495218	0.631793	0.80051	-6.94756	0	1.5587	3.83606	9.86503	2.84589e-06	0.000177787	5.15396	1	1	COMP	19	cartilage oligomeric matrix protein [Source:HGNC Symbol;Acc:2227]
ENSG00000105671	-0.712583	6.11905	-5.96239	0.000176733	0.00362879	0.928925	1	-0.38322	6.11905	-3.20651	0.0101155	0.053275	-3.40238	0	1	DDX49	19	DEAD (Asp-Glu-Ala-Asp) box polypeptide 49 [Source:HGNC Symbol;Acc:18684]
ENSG00000105676	-0.620045	4.8015	-4.38242	0.00158239	0.0150008	-1.36294	1	0.0757699	4.8015	0.535535	0.604692	0.788925	-7.06131	0	1	ARMC6	19	armadillo repeat containing 6 [Source:HGNC Symbol;Acc:25049]
ENSG00000105677	-0.502287	9.3669	-3.02142	0.0137316	0.0670956	-3.58524	0	-1.04191	9.3669	-6.26741	0.000120455	0.00210964	1.22902	1	1	TMEM147	19	transmembrane protein 147 [Source:HGNC Symbol;Acc:30414]
ENSG00000105697	1.77604	7.89426	8.38893	1.13553e-05	0.000661508	3.78801	1	0.773055	7.89426	3.65143	0.00491531	0.031019	-2.66104	1	2	HAMP	19	hepcidin antimicrobial peptide [Source:HGNC Symbol;Acc:15598]
ENSG00000105707	0.563897	3.98222	4.25722	0.00191156	0.0171553	-1.55955	0	0.615662	3.98222	4.64802	0.00106766	0.0101015	-1.06952	1	1	HPN	19	hepsin [Source:HGNC Symbol;Acc:5155]
ENSG00000105755	0.710441	7.67216	2.73369	0.0221743	0.0936797	-4.06613	0	1.80825	7.67216	6.95793	5.28189e-05	0.0011741	2.09841	1	1	ETHE1	19	ethylmalonic encephalopathy 1 [Source:HGNC Symbol;Acc:23287]
ENSG00000105771	0.774267	6.06162	5.32225	0.000411607	0.0062475	0.0436851	1	0.487484	6.06162	3.35093	0.00798522	0.0444754	-3.16053	0	1	SMG9	19	smg-9 homolog, nonsense mediated mRNA decay factor (C. elegans) [Source:HGNC Symbol;Acc:25763]
ENSG00000105825	2.30803	3.71879	19.1852	7.2186e-09	1.05975e-05	10.8985	1	0.477717	3.71879	3.97095	0.00296886	0.0214706	-2.1383	0	1	TFPI2	7	tissue factor pathway inhibitor 2 [Source:HGNC Symbol;Acc:11761]
ENSG00000105835	2.53164	4.98339	7.8168	2.04637e-05	0.000957917	3.1784	1	2.16808	4.98339	6.69427	7.18634e-05	0.00145687	1.77386	1	2	NAMPT	7	nicotinamide phosphoribosyltransferase [Source:HGNC Symbol;Acc:30092]
ENSG00000105851	-1.17479	4.34293	-5.76173	0.000228969	0.00430496	0.657784	1	-1.02054	4.34293	-5.00522	0.000639119	0.00692032	-0.530374	1	2	PIK3CG	7	phosphoinositide-3-kinase, catalytic, gamma polypeptide [Source:HGNC Symbol;Acc:8978]
ENSG00000105854	-0.878942	6.07524	-3.51587	0.00611058	0.0383454	-2.76061	1	-2.42791	6.07524	-9.71193	3.25818e-06	0.000195902	5.01388	1	2	PON2	7	paraoxonase 2 [Source:HGNC Symbol;Acc:9205]
ENSG00000105855	3.17071	5.79587	16.2988	3.21815e-08	2.48272e-05	9.56813	1	2.99718	5.79587	15.4068	5.37355e-08	1.9472e-05	9.14646	1	2	ITGB8	7	integrin, beta 8 [Source:HGNC Symbol;Acc:6163]
ENSG00000105875	-1.02067	7.24232	-7.10541	4.46215e-05	0.0015205	2.36756	1	-0.618043	7.24232	-4.30251	0.00178478	0.0147409	-1.60765	1	2	WDR91	7	WD repeat domain 91 [Source:HGNC Symbol;Acc:24997]
ENSG00000105877	1.00191	4.26505	6.17629	0.0001349	0.00300826	1.21167	1	1.08947	4.26505	6.71602	7.00388e-05	0.00142809	1.80098	1	2	DNAH11	7	dynein, axonemal, heavy chain 11 [Source:HGNC Symbol;Acc:2942]
ENSG00000105976	1.05219	3.49996	8.88432	6.9912e-06	0.000511998	4.28763	1	0.525438	3.49996	4.43662	0.00145912	0.012776	-1.39691	0	1	MET	7	met proto-oncogene (hepatocyte growth factor receptor) [Source:HGNC Symbol;Acc:7029]
ENSG00000105993	0.974449	8.88826	7.55064	2.72192e-05	0.00114759	2.88215	1	0.720462	8.88826	5.58259	0.00028986	0.00394322	0.30259	1	2	DNAJB6	7	DnaJ (Hsp40) homolog, subfamily B, member 6 [Source:HGNC Symbol;Acc:14888]
ENSG00000106009	-0.838627	6.17976	-8.0916	1.53597e-05	0.000802943	3.47573	1	-0.674037	6.17976	-6.50354	9.02647e-05	0.00172659	1.53342	1	2	BRAT1	7	BRCA1-associated ATM activator 1 [Source:HGNC Symbol;Acc:21701]
ENSG00000106049	0.904285	7.55406	6.50717	8.987e-05	0.00232929	1.63654	1	1.18402	7.55406	8.52014	9.96463e-06	0.000384971	3.85004	1	2	HIBADH	7	3-hydroxyisobutyrate dehydrogenase [Source:HGNC Symbol;Acc:4907]
ENSG00000106066	-0.402545	11.0291	-1.22178	0.251483	0.476107	-6.31987	0	-2.28475	11.0291	-6.93455	5.42626e-05	0.00119793	2.07	1	1	CPVL	7	carboxypeptidase, vitellogenic-like [Source:HGNC Symbol;Acc:14399]
ENSG00000106070	0.443805	5.74401	2.47652	0.034092	0.127138	-4.49156	0	-0.63313	5.74401	-3.53298	0.00594429	0.0357897	-2.85717	1	1	GRB10	7	growth factor receptor-bound protein 10 [Source:HGNC Symbol;Acc:4564]
ENSG00000106080	-0.828634	4.54151	-3.74039	0.00426608	0.0303291	-2.39099	1	-0.629987	4.54151	-2.84372	0.0184532	0.0832496	-4.0114	0	1	FKBP14	7	FK506 binding protein 14, 22 kDa [Source:HGNC Symbol;Acc:18625]
ENSG00000106089	0.587399	3.75515	4.55726	0.00121991	0.0125901	-1.09187	1	0.479936	3.75515	3.72352	0.00438193	0.0284752	-2.54225	0	1	STX1A	7	syntaxin 1A (brain) [Source:HGNC Symbol;Acc:11433]
ENSG00000106144	-0.600259	5.7216	-4.68466	0.00101206	0.0111017	-0.896987	1	-0.335083	5.7216	-2.61512	0.0270372	0.109851	-4.39304	0	1	CASP2	7	caspase 2, apoptosis-related cysteine peptidase [Source:HGNC Symbol;Acc:1503]
ENSG00000106178	0.88713	6.707	2.36845	0.0408367	0.143941	-4.66798	0	2.02369	6.707	5.40281	0.000368907	0.00469923	0.0483529	1	1	CCL24	7	chemokine (C-C motif) ligand 24 [Source:HGNC Symbol;Acc:10623]
ENSG00000106236	0.376481	3.55126	1.47344	0.173246	0.378669	-6.00832	0	1.61275	3.55126	6.31184	0.000114029	0.00202914	1.28687	1	1	NPTX2	7	neuronal pentraxin II [Source:HGNC Symbol;Acc:7953]
ENSG00000106258	0.19664	3.66827	1.7819	0.106958	0.276341	-5.5793	0	0.699354	3.66827	6.33735	0.000110506	0.0019845	1.31998	1	1	CYP3A5	7	cytochrome P450, family 3, subfamily A, polypeptide 5 [Source:HGNC Symbol;Acc:2638]
ENSG00000106305	-0.867729	7.32346	-6.30165	0.000115469	0.00270507	1.37441	1	-0.519763	7.32346	-3.77464	0.00404068	0.0270256	-2.45829	0	1	AIMP2	7	aminoacyl tRNA synthetase complex-interacting multifunctional protein 2 [Source:HGNC Symbol;Acc:20609]
ENSG00000106366	1.10578	5.27054	7.09339	4.52345e-05	0.00153545	2.35334	1	0.876273	5.27054	5.62114	0.000275415	0.00381146	0.3565	1	2	SERPINE1	7	serpin peptidase inhibitor, clade E (nexin, plasminogen activator inhibitor type 1), member 1 [Source:HGNC Symbol;Acc:8583]
ENSG00000106392	-0.755209	6.27706	-3.47525	0.00652509	0.0400388	-2.82791	1	0.561073	6.27706	2.58189	0.028583	0.114547	-4.44817	0	1	C1GALT1	7	core 1 synthase, glycoprotein-N-acetylgalactosamine 3-beta-galactosyltransferase, 1 [Source:HGNC Symbol;Acc:24337]
ENSG00000106443	0.342035	5.21067	2.75983	0.0212264	0.0906976	-4.02256	0	0.962377	5.21067	7.76528	2.16129e-05	0.000633536	3.03859	1	1	PHF14	7	PHD finger protein 14 [Source:HGNC Symbol;Acc:22203]
ENSG00000106460	-0.813228	7.33659	-6.08354	0.000151549	0.00325517	1.08986	1	-0.437315	7.33659	-3.27143	0.00909316	0.0492754	-3.29355	0	1	TMEM106B	7	transmembrane protein 106B [Source:HGNC Symbol;Acc:22407]
ENSG00000106462	1.79646	4.19576	10.9051	1.18676e-06	0.00017219	6.08985	1	0.842964	4.19576	5.11706	0.000546329	0.00617362	-0.36529	1	2	EZH2	7	enhancer of zeste homolog 2 (Drosophila) [Source:HGNC Symbol;Acc:3527]
ENSG00000106524	-0.495348	7.46179	-2.7571	0.0213236	0.0910244	-4.02712	0	-1.03032	7.46179	-5.73472	0.00023719	0.00342087	0.514103	1	1	ANKMY2	7	ankyrin repeat and MYND domain containing 2 [Source:HGNC Symbol;Acc:25370]
ENSG00000106546	0.015722	9.58642	0.11029	0.914493	0.960968	-7.07384	0	0.587819	9.58642	4.12357	0.00234446	0.0180439	-1.89241	1	1	AHR	7	aryl hydrocarbon receptor [Source:HGNC Symbol;Acc:348]
ENSG00000106560	-2.04331	9.13493	-6.12402	0.000144023	0.00314017	1.14318	1	-1.33026	9.13493	-3.98695	0.00289586	0.021116	-2.1124	1	2	GIMAP2	7	GTPase, IMAP family member 2 [Source:HGNC Symbol;Acc:21789]
ENSG00000106605	0.561928	8.92419	3.99017	0.0028814	0.0229069	-1.98541	0	-1.62005	8.92419	-11.5037	7.40758e-07	7.96808e-05	6.53601	1	1	BLVRA	7	biliverdin reductase A [Source:HGNC Symbol;Acc:1062]
ENSG00000106610	-0.413609	5.90253	-2.12595	0.0610885	0.19068	-5.05601	0	-0.76104	5.90253	-3.91174	0.00325637	0.0230114	-2.23438	1	1	STAG3L4	7	stromal antigen 3-like 4 [Source:HGNC Symbol;Acc:33887]
ENSG00000106665	0.88144	4.79668	4.70257	0.00098601	0.0109249	-0.86977	1	-0.345472	4.79668	-1.84313	0.0969452	0.266316	-5.62224	0	1	CLIP2	7	CAP-GLY domain containing linker protein 2 [Source:HGNC Symbol;Acc:2586]
ENSG00000106701	1.55505	4.75183	9.03426	6.06254e-06	0.00047925	4.43397	1	0.127415	4.75183	0.740236	0.4772	0.696462	-6.92375	0	1	FSD1L	9	fibronectin type III and SPRY domain containing 1-like [Source:HGNC Symbol;Acc:13753]
ENSG00000106723	-0.829914	7.08492	-5.63605	0.000270039	0.00479082	0.485018	1	-0.573008	7.08492	-3.89137	0.00336198	0.0235665	-2.26754	0	1	SPIN1	9	spindlin 1 [Source:HGNC Symbol;Acc:11243]
ENSG00000106733	-0.0395752	7.14543	-0.204619	0.842223	0.92376	-7.05758	0	-0.848275	7.14543	-4.38591	0.00157413	0.0134875	-1.47632	1	1	C9orf95	9	chromosome 9 open reading frame 95 [Source:HGNC Symbol;Acc:26057]
ENSG00000106780	0.121861	5.64712	0.762886	0.464206	0.681832	-6.77042	0	0.821622	5.64712	5.14361	0.000526498	0.00599891	-0.326365	1	1	MEGF9	9	multiple EGF-like-domains 9 [Source:HGNC Symbol;Acc:3234]
ENSG00000106799	-0.708175	5.25047	-4.75777	0.000910143	0.0103378	-0.786171	1	-1.0253	5.25047	-6.88833	5.72451e-05	0.00123741	2.01361	1	2	TGFBR1	9	transforming growth factor, beta receptor 1 [Source:HGNC Symbol;Acc:11772]
ENSG00000106829	0.478859	6.72879	4.67595	0.00102499	0.0111637	-0.910237	0	1.33505	6.72879	13.0365	2.43019e-07	3.89222e-05	7.66083	1	1	TLE4	9	transducin-like enhancer of split 4 (E(sp1) homolog, Drosophila) [Source:HGNC Symbol;Acc:11840]
ENSG00000106853	1.87864	8.55093	8.05712	1.59161e-05	0.000819866	3.43889	1	0.920396	8.55093	3.94739	0.00307993	0.0220437	-2.17649	1	2	PTGR1	9	prostaglandin reductase 1 [Source:HGNC Symbol;Acc:18429]
ENSG00000106868	-0.242644	6.05667	-1.05234	0.318889	0.548973	-6.50569	0	-0.845207	6.05667	-3.66564	0.00480503	0.0304776	-2.63759	1	1	SUSD1	9	sushi domain containing 1 [Source:HGNC Symbol;Acc:25413]
ENSG00000106948	-1.33006	7.07061	-9.05387	5.95144e-06	0.000475252	4.45294	1	-1.41032	7.07061	-9.60023	3.60024e-06	0.000202006	4.91039	1	2	AKNA	9	AT-hook transcription factor [Source:HGNC Symbol;Acc:24108]
ENSG00000106991	-0.465354	9.38342	-2.12184	0.0615042	0.191468	-5.06247	0	0.889123	9.38342	4.05407	0.00260957	0.019447	-2.00405	1	1	ENG	9	endoglin [Source:HGNC Symbol;Acc:3349]
ENSG00000107020	0.857594	8.30598	4.56633	0.0012037	0.0125255	-1.07792	1	0.498216	8.30598	2.6528	0.0253857	0.105129	-4.3304	0	1	C9orf46	9	chromosome 9 open reading frame 46 [Source:HGNC Symbol;Acc:23633]
ENSG00000107099	-0.729893	6.88581	-3.71151	0.00446638	0.0311457	-2.43829	1	-0.199347	6.88581	-1.01368	0.336062	0.575914	-6.68032	0	1	DOCK8	9	dedicator of cytokinesis 8 [Source:HGNC Symbol;Acc:19191]
ENSG00000107104	1.51098	7.81647	4.80588	0.000849093	0.00982172	-0.713648	1	1.67385	7.81647	5.3239	0.00041068	0.00504529	-0.0646942	1	2	KANK1	9	KN motif and ankyrin repeat domains 1 [Source:HGNC Symbol;Acc:19309]
ENSG00000107130	0.734961	5.61969	4.52934	0.00127129	0.0130211	-1.13489	1	0.590939	5.61969	3.64178	0.00499175	0.0313666	-2.67698	1	2	NCS1	9	neuronal calcium sensor 1 [Source:HGNC Symbol;Acc:3953]
ENSG00000107175	0.470329	7.73305	2.7666	0.0209878	0.0899835	-4.01128	0	0.855765	7.73305	5.03383	0.000613873	0.00672786	-0.487971	1	1	CREB3	9	cAMP responsive element binding protein 3 [Source:HGNC Symbol;Acc:2347]
ENSG00000107249	1.51429	5.92428	5.87727	0.000197122	0.00387146	0.814605	1	1.05546	5.92428	4.09644	0.00244438	0.0186177	-1.93592	1	2	GLIS3	9	GLIS family zinc finger 3 [Source:HGNC Symbol;Acc:28510]
ENSG00000107317	-0.246166	3.4192	-1.63327	0.135339	0.32294	-5.79168	0	-0.664575	3.4192	-4.40933	0.00151986	0.0131445	-1.4396	1	1	PTGDS	9	prostaglandin D2 synthase 21kDa (brain) [Source:HGNC Symbol;Acc:9592]
ENSG00000107537	-0.336403	7.00451	-2.38685	0.0396015	0.141112	-4.63806	0	-1.59197	7.00451	-11.2954	8.70631e-07	8.70845e-05	6.37137	1	1	PHYH	10	phytanoyl-CoA 2-hydroxylase [Source:HGNC Symbol;Acc:8940]
ENSG00000107562	-0.36559	3.73357	-1.0777	0.307993	0.53823	-6.47923	0	-1.35165	3.73357	-3.98444	0.00290718	0.0211723	-2.11646	1	1	CXCL12	10	chemokine (C-X-C motif) ligand 12 [Source:HGNC Symbol;Acc:10672]
ENSG00000107593	-0.75269	4.81848	-3.48289	0.00644496	0.0397202	-2.81524	1	-2.38409	4.81848	-11.0318	1.07208e-06	9.88839e-05	6.15871	1	2	PKD2L1	10	polycystic kidney disease 2-like 1 [Source:HGNC Symbol;Acc:9011]
ENSG00000107738	-1.13579	6.86029	-4.14565	0.00226634	0.0192973	-1.73641	1	-0.0738444	6.86029	-0.269533	0.793331	0.899653	-7.17691	0	1	C10orf54	10	chromosome 10 open reading frame 54 [Source:HGNC Symbol;Acc:30085]
ENSG00000107779	0.00981526	3.60457	0.0350656	0.972759	0.987615	-7.07985	0	1.12686	3.60457	4.02577	0.00272644	0.0201395	-2.04966	1	1	BMPR1A	10	bone morphogenetic protein receptor, type IA [Source:HGNC Symbol;Acc:1076]
ENSG00000107789	0.230299	8.88946	1.31129	0.22082	0.440758	-6.2136	0	1.04876	8.88946	5.97151	0.000174688	0.00274544	0.836796	1	1	MINPP1	10	multiple inositol-polyphosphate phosphatase 1 [Source:HGNC Symbol;Acc:7102]
ENSG00000107798	-0.37258	12.1215	-1.71528	0.11893	0.296644	-5.67569	0	-2.06869	12.1215	-9.52382	3.85688e-06	0.000210004	4.83896	1	1	LIPA	10	lipase A, lysosomal acid, cholesterol esterase [Source:HGNC Symbol;Acc:6617]
ENSG00000107815	-0.972751	4.70019	-5.9445	0.00018082	0.00368094	0.904987	1	-0.224504	4.70019	-1.37195	0.201864	0.425133	-6.27313	0	1	C10orf2	10	chromosome 10 open reading frame 2 [Source:HGNC Symbol;Acc:1160]
ENSG00000107816	-0.593841	5.49884	-3.89548	0.00334036	0.025387	-2.13838	1	-1.12163	5.49884	-7.35769	3.36309e-05	0.000856178	2.57377	1	2	LZTS2	10	leucine zipper, putative tumor suppressor 2 [Source:HGNC Symbol;Acc:29381]
ENSG00000107902	-0.60501	5.79718	-3.79293	0.00392548	0.0286473	-2.30515	1	-0.491083	5.79718	-3.0787	0.012489	0.0622049	-3.61693	0	1	LHPP	10	phospholysine phosphohistidine inorganic pyrophosphate phosphatase [Source:HGNC Symbol;Acc:30042]
ENSG00000107951	-1.15941	6.32575	-8.40377	1.11879e-05	0.000656991	3.80334	1	-0.809802	6.32575	-5.86971	0.000199051	0.0030204	0.699038	1	2	MTPAP	10	mitochondrial poly(A) polymerase [Source:HGNC Symbol;Acc:25532]
ENSG00000107959	0.630145	7.10945	6.81976	6.20037e-05	0.00179251	2.02434	1	-0.180814	7.10945	-1.95686	0.0806247	0.235355	-5.45072	0	1	PITRM1	10	pitrilysin metallopeptidase 1 [Source:HGNC Symbol;Acc:17663]
ENSG00000107968	1.40246	7.71613	6.95241	5.31563e-05	0.00168122	2.18503	1	1.86011	7.71613	9.22113	5.08946e-06	0.000246321	4.55083	1	2	MAP3K8	10	mitogen-activated protein kinase kinase kinase 8 [Source:HGNC Symbol;Acc:6860]
ENSG00000108100	-0.692762	7.75137	-4.96819	0.000673466	0.0085172	-0.471461	1	-0.306059	7.75137	-2.19492	0.0545017	0.180548	-5.07876	0	1	CCNY	10	cyclin Y [Source:HGNC Symbol;Acc:23354]
ENSG00000108179	1.37054	7.41496	13.3026	2.02693e-07	6.73744e-05	7.83288	1	0.417375	7.41496	4.05111	0.00262155	0.0195033	-2.00882	0	1	PPIF	10	peptidylprolyl isomerase F [Source:HGNC Symbol;Acc:9259]
ENSG00000108292	0.449362	6.50497	2.86794	0.0177229	0.0799473	-3.84207	0	0.658371	6.50497	4.20188	0.00207953	0.01648	-1.76731	1	1	MLLT6	17	myeloid/lymphoid or mixed-lineage leukemia (trithorax homolog, Drosophila); translocated to, 6 [Source:HGNC Symbol;Acc:7138]
ENSG00000108306	1.31728	6.41954	5.51925	0.0003154	0.00529685	0.322422	1	1.08832	6.41954	4.55996	0.00121507	0.01112	-1.20516	1	2	FBXL20	17	F-box and leucine-rich repeat protein 20 [Source:HGNC Symbol;Acc:24679]
ENSG00000108352	0.4835	3.73497	4.02082	0.00274745	0.0222537	-1.93609	0	1.08837	3.73497	9.05095	5.96784e-06	0.000273104	4.38509	1	1	RAPGEFL1	17	Rap guanine nucleotide exchange factor (GEF)-like 1 [Source:HGNC Symbol;Acc:17428]
ENSG00000108384	-0.894377	5.94676	-4.99584	0.000647642	0.00831482	-0.430577	1	-0.627077	5.94676	-3.50274	0.00624145	0.0371347	-2.90741	1	2	RAD51C	17	RAD51 homolog C (S. cerevisiae) [Source:HGNC Symbol;Acc:9820]
ENSG00000108405	-0.214451	5.01366	-1.08552	0.304688	0.53495	-6.47097	0	-0.965678	5.01366	-4.88812	0.000754669	0.0078298	-0.705142	1	1	P2RX1	17	purinergic receptor P2X, ligand-gated ion channel, 1 [Source:HGNC Symbol;Acc:8533]
ENSG00000108424	-0.615969	8.2498	-5.75625	0.000230612	0.00432661	0.650298	1	-0.538553	8.2498	-5.0328	0.000614767	0.00672786	-0.489501	0	1	KPNB1	17	karyopherin (importin) beta 1 [Source:HGNC Symbol;Acc:6400]
ENSG00000108439	-0.649631	6.54849	-5.51081	0.000318984	0.00533669	0.310589	1	-0.19073	6.54849	-1.61796	0.138619	0.335955	-5.9468	0	1	PNPO	17	pyridoxamine 5'-phosphate oxidase [Source:HGNC Symbol;Acc:30260]
ENSG00000108465	-0.542262	9.35634	-3.08668	0.0123251	0.062091	-3.47598	0	-0.652501	9.35634	-3.71419	0.00444741	0.028784	-2.5576	1	1	CDK5RAP3	17	CDK5 regulatory subunit associated protein 3 [Source:HGNC Symbol;Acc:18673]
ENSG00000108479	-0.517736	4.80089	-2.83335	0.0187751	0.0834622	-3.89988	0	-0.887295	4.80089	-4.85579	0.000790377	0.00810481	-0.753734	1	1	GALK1	17	galactokinase 1 [Source:HGNC Symbol;Acc:4118]
ENSG00000108518	-0.70245	9.63518	-4.40315	0.00153398	0.0147127	-1.33059	1	0.0145776	9.63518	0.0913763	0.929107	0.968297	-7.21213	0	1	PFN1	17	profilin 1 [Source:HGNC Symbol;Acc:8881]
ENSG00000108551	2.18041	3.92198	6.79611	6.37427e-05	0.00181436	1.99546	1	1.15767	3.92198	3.60834	0.00526625	0.0325592	-2.73227	1	2	RASD1	17	RAS, dexamethasone-induced 1 [Source:HGNC Symbol;Acc:15828]
ENSG00000108561	0.697093	9.78325	5.40827	0.00036619	0.00582236	0.166084	1	1.24791	9.78325	9.6817	3.34708e-06	0.000198351	4.98598	1	2	C1QBP	17	complement component 1, q subcomponent binding protein [Source:HGNC Symbol;Acc:1243]
ENSG00000108578	-0.712828	7.55961	-5.28601	0.000432525	0.00640234	-0.00820546	1	-0.86334	7.55961	-6.40214	0.000102082	0.00186555	1.40363	1	2	BLMH	17	bleomycin hydrolase [Source:HGNC Symbol;Acc:1059]
ENSG00000108582	0.810274	7.56731	4.6299	0.00109635	0.0117128	-0.980475	1	0.486351	7.56731	2.77901	0.0205574	0.0897101	-4.11976	0	1	CPD	17	carboxypeptidase D [Source:HGNC Symbol;Acc:2301]
ENSG00000108592	-0.668481	8.21797	-7.15306	4.22772e-05	0.0014898	2.42381	1	-0.339579	8.21797	-3.63366	0.00505703	0.0316145	-2.69041	0	1	FTSJ3	17	FtsJ homolog 3 (E. coli) [Source:HGNC Symbol;Acc:17136]
ENSG00000108604	-0.69888	6.14105	-4.32846	0.00171621	0.0158212	-1.44743	1	-0.41107	6.14105	-2.54593	0.0303552	0.119662	-4.5077	0	1	SMARCD2	17	SWI/SNF related, matrix associated, actin dependent regulator of chromatin, subfamily d, member 2 [Source:HGNC Symbol;Acc:11107]
ENSG00000108639	-0.957732	9.15989	-5.38816	0.000376304	0.00591907	0.137559	1	-0.290268	9.15989	-1.63303	0.135388	0.3309	-5.92577	0	1	SYNGR2	17	synaptogyrin 2 [Source:HGNC Symbol;Acc:11499]
ENSG00000108679	0.13632	5.76597	0.631512	0.542725	0.741062	-6.86602	0	-1.1561	5.76597	-5.35572	0.000393254	0.00492275	-0.0190033	1	1	LGALS3BP	17	lectin, galactoside-binding, soluble, 3 binding protein [Source:HGNC Symbol;Acc:6564]
ENSG00000108691	0.6348	10.9468	1.74141	0.114095	0.28896	-5.6381	0	2.67201	10.9468	7.32997	3.468e-05	0.000872796	2.54145	1	1	CCL2	17	chemokine (C-C motif) ligand 2 [Source:HGNC Symbol;Acc:10618]
ENSG00000108702	2.65796	4.90369	7.21018	3.96428e-05	0.00143406	2.49086	1	3.72164	4.90369	10.0956	2.32896e-06	0.000157805	5.36116	1	2	CCL1	17	chemokine (C-C motif) ligand 1 [Source:HGNC Symbol;Acc:10609]
ENSG00000108773	-1.04127	5.71619	-6.20638	0.000129933	0.00292772	1.25093	1	-1.46197	5.71619	-8.7139	8.24013e-06	0.000338383	4.0486	1	2	KAT2A	17	K(lysine) acetyltransferase 2A [Source:HGNC Symbol;Acc:4201]
ENSG00000108784	-0.969061	7.43462	-8.52877	9.87994e-06	0.000617216	3.93161	1	-1.88927	7.43462	-16.6276	2.68169e-08	1.2759e-05	9.81294	1	2	NAGLU	17	N-acetylglucosaminidase, alpha [Source:HGNC Symbol;Acc:7632]
ENSG00000108798	-2.04615	7.64141	-12.4904	3.56424e-07	9.02685e-05	7.28321	1	-1.17152	7.64141	-7.15133	4.23602e-05	0.00100867	2.33086	1	2	ABI3	17	ABI family, member 3 [Source:HGNC Symbol;Acc:29859]
ENSG00000108828	-0.574507	5.74182	-5.92631	0.000185083	0.00374021	0.880589	0	-1.52534	5.74182	-15.7346	4.43671e-08	1.7764e-05	9.33139	1	1	VAT1	17	vesicle amine transport protein 1 homolog (T. californica) [Source:HGNC Symbol;Acc:16919]
ENSG00000108854	-1.11985	7.52185	-12.2105	4.36274e-07	0.000102478	7.08464	1	-0.0569181	7.52185	-0.620614	0.549573	0.750064	-7.00907	0	1	SMURF2	17	SMAD specific E3 ubiquitin protein ligase 2 [Source:HGNC Symbol;Acc:16809]
ENSG00000108861	0.717201	5.97876	3.53634	0.00591221	0.0375178	-2.72674	1	-0.191106	5.97876	-0.942297	0.369577	0.608571	-6.75001	0	1	DUSP3	17	dual specificity phosphatase 3 [Source:HGNC Symbol;Acc:3069]
ENSG00000108932	0.899523	7.43147	2.52799	0.0312799	0.119507	-4.40696	0	1.84453	7.43147	5.18383	0.000497912	0.0057861	-0.267585	1	1	SLC16A6	17	solute carrier family 16, member 6 (monocarboxylic acid transporter 7) [Source:HGNC Symbol;Acc:10927]
ENSG00000108950	0.790792	5.4714	2.31239	0.0448372	0.153736	-4.75874	0	2.25461	5.4714	6.59279	8.10855e-05	0.00158368	1.64653	1	1	FAM20A	17	family with sequence similarity 20, member A [Source:HGNC Symbol;Acc:23015]
ENSG00000108960	-1.07837	6.90372	-6.29823	0.000115956	0.00270929	1.37	1	-1.33041	6.90372	-7.77026	2.14989e-05	0.000633354	3.04415	1	2	MMD	17	monocyte to macrophage differentiation-associated [Source:HGNC Symbol;Acc:7153]
ENSG00000108961	-0.67129	8.67086	-5.59598	0.000284753	0.00494657	0.42946	1	-0.883677	8.67086	-7.36648	3.33056e-05	0.000852826	2.584	1	2	RANGRF	17	RAN guanine nucleotide release factor [Source:HGNC Symbol;Acc:17679]
ENSG00000109046	0.715087	8.39355	6.95488	5.3005e-05	0.00168067	2.188	1	0.318358	8.39355	3.09632	0.0121303	0.0609673	-3.58733	0	1	WSB1	17	WD repeat and SOCS box containing 1 [Source:HGNC Symbol;Acc:19221]
ENSG00000109084	-0.379361	4.46181	-1.53051	0.158753	0.358191	-5.93248	0	-1.39072	4.46181	-5.61078	0.000279221	0.00384264	0.342028	1	1	TMEM97	17	transmembrane protein 97 [Source:HGNC Symbol;Acc:28106]
ENSG00000109099	1.0099	9.84241	5.48515	0.000330146	0.00548179	0.274575	1	1.06338	9.84241	5.77562	0.000224862	0.00330813	0.570405	1	2	PMP22	17	peripheral myelin protein 22 [Source:HGNC Symbol;Acc:9118]
ENSG00000109220	1.04221	8.3673	5.54271	0.00030567	0.00517753	0.355233	1	0.743775	8.3673	3.95557	0.00304086	0.02183	-2.16321	1	2	CHIC2	4	cysteine-rich hydrophobic domain 2 [Source:HGNC Symbol;Acc:1935]
ENSG00000109320	0.30582	11.188	1.63501	0.134971	0.322498	-5.78925	0	0.636572	11.188	3.4033	0.00733255	0.0416534	-3.07305	1	1	NFKB1	4	nuclear factor of kappa light polypeptide gene enhancer in B-cells 1 [Source:HGNC Symbol;Acc:7794]
ENSG00000109436	0.819817	8.78036	7.75323	2.18917e-05	0.000998756	3.1084	1	0.753623	8.78036	7.12722	4.35314e-05	0.001026	2.30214	1	2	TBC1D9	4	TBC1 domain family, member 9 (with GRAM domain) [Source:HGNC Symbol;Acc:21710]
ENSG00000109445	-0.402447	8.42938	-3.55276	0.00575797	0.0368116	-2.6996	0	-1.08273	8.42938	-9.55827	3.73875e-06	0.000206897	4.87124	1	1	ZNF330	4	zinc finger protein 330 [Source:HGNC Symbol;Acc:15462]
ENSG00000109458	0.349917	4.42325	2.08486	0.0653706	0.199832	-5.12043	0	0.644297	4.42325	3.83882	0.00365134	0.025006	-2.35324	1	1	GAB1	4	GRB2-associated binding protein 1 [Source:HGNC Symbol;Acc:4066]
ENSG00000109466	0.0877008	6.57108	0.411424	0.689965	0.836266	-6.98838	0	1.0538	6.57108	4.94361	0.000697342	0.00738286	-0.622076	1	1	KLHL2	4	kelch-like 2, Mayven (Drosophila) [Source:HGNC Symbol;Acc:6353]
ENSG00000109501	0.807246	4.74718	3.17272	0.0106937	0.0559358	-3.332	0	2.32401	4.74718	9.13407	5.51967e-06	0.00026	4.46638	1	1	WFS1	4	Wolfram syndrome 1 (wolframin) [Source:HGNC Symbol;Acc:12762]
ENSG00000109519	0.685029	7.66346	5.01477	0.000630576	0.00815628	-0.402651	1	0.249879	7.66346	1.82924	0.0991369	0.270351	-5.64286	0	1	GRPEL1	4	GrpE-like 1, mitochondrial (E. coli) [Source:HGNC Symbol;Acc:19696]
ENSG00000109534	-0.77308	4.59056	-4.26835	0.00187953	0.0169282	-1.54198	1	-0.45832	4.59056	-2.53049	0.0311493	0.121868	-4.53321	0	1	GAR1	4	GAR1 ribonucleoprotein homolog (yeast) [Source:HGNC Symbol;Acc:14264]
ENSG00000109654	1.39596	3.69042	4.42524	0.00148412	0.0144451	-1.29618	1	0.623175	3.69042	1.97549	0.078212	0.230682	-5.42221	0	1	TRIM2	4	tripartite motif containing 2 [Source:HGNC Symbol;Acc:15974]
ENSG00000109667	-0.145694	5.45844	-0.464341	0.652949	0.814371	-6.96344	0	-3.60977	5.45844	-11.5047	7.4019e-07	7.96808e-05	6.53679	1	1	SLC2A9	4	solute carrier family 2 (facilitated glucose transporter), member 9 [Source:HGNC Symbol;Acc:13446]
ENSG00000109686	-0.0892916	3.02376	-0.808726	0.43862	0.66146	-6.7333	0	0.592917	3.02376	5.37013	0.000385626	0.00486426	0.00163926	1	1	SH3D19	4	SH3 domain containing 19 [Source:HGNC Symbol;Acc:30418]
ENSG00000109756	0.883922	5.58007	4.16014	0.00221654	0.0190111	-1.71335	1	0.471359	5.58007	2.21843	0.0524177	0.17526	-5.04123	0	1	RAPGEF2	4	Rap guanine nucleotide exchange factor (GEF) 2 [Source:HGNC Symbol;Acc:16854]
ENSG00000109762	3.24961	6.62008	16.2043	3.39354e-08	2.48272e-05	9.51948	1	3.42178	6.62008	17.0628	2.11739e-08	1.16569e-05	10.0366	1	2	SNX25	4	sorting nexin 25 [Source:HGNC Symbol;Acc:21883]
ENSG00000109814	1.09863	7.24099	6.06917	0.000154324	0.00330343	1.07087	1	-0.10066	7.24099	-0.556076	0.591121	0.779927	-7.04935	0	1	UGDH	4	UDP-glucose 6-dehydrogenase [Source:HGNC Symbol;Acc:12525]
ENSG00000109854	0.6471	8.60179	5.19916	0.000487458	0.00686863	-0.13334	1	0.2909	8.60179	2.33726	0.0430171	0.152819	-4.84977	0	1	HTATIP2	11	HIV-1 Tat interactive protein 2, 30kDa [Source:HGNC Symbol;Acc:16637]
ENSG00000109929	0.312817	7.15873	1.52372	0.160418	0.360838	-5.94158	0	0.989665	7.15873	4.82063	0.000831271	0.00839708	-0.806746	1	1	SC5DL	11	sterol-C5-desaturase (ERG3 delta-5-desaturase homolog, S. cerevisiae)-like [Source:HGNC Symbol;Acc:10547]
ENSG00000109943	-1.3002	5.54234	-6.01377	0.00016554	0.00346768	0.997423	1	-2.31999	5.54234	-10.7306	1.36729e-06	0.000114387	5.90946	1	2	CRTAM	11	cytotoxic and regulatory T cell molecule [Source:HGNC Symbol;Acc:24313]
ENSG00000110002	-0.652034	5.71792	-3.27435	0.00904979	0.0499781	-3.1622	1	-0.184335	5.71792	-0.925683	0.377715	0.615846	-6.76563	0	1	VWA5A	11	von Willebrand factor A domain containing 5A [Source:HGNC Symbol;Acc:6658]
ENSG00000110042	2.6307	8.05934	11.5555	7.1187e-07	0.000124339	6.60026	1	3.47786	8.05934	15.2768	5.80387e-08	1.96628e-05	9.07184	1	2	DTX4	11	deltex homolog 4 (Drosophila) [Source:HGNC Symbol;Acc:29151]
ENSG00000110047	1.70859	6.086	9.0025	6.24735e-06	0.000487467	4.40316	1	0.887321	6.086	4.67527	0.001026	0.00981275	-1.02776	1	2	EHD1	11	EH-domain containing 1 [Source:HGNC Symbol;Acc:3242]
ENSG00000110063	-0.312321	6.59144	-2.00101	0.0750169	0.218767	-5.25042	0	-0.648841	6.59144	-4.15705	0.00222706	0.0172914	-1.83883	1	1	DCPS	11	decapping enzyme, scavenger [Source:HGNC Symbol;Acc:29812]
ENSG00000110077	-0.754376	9.47487	-2.25325	0.0494728	0.164725	-4.85384	0	-3.24173	9.47487	-9.68277	3.3439e-06	0.000198351	4.98697	1	1	MS4A6A	11	membrane-spanning 4-domains, subfamily A, member 6A [Source:HGNC Symbol;Acc:13375]
ENSG00000110080	0.697505	5.36611	4.13268	0.00231189	0.0195528	-1.75707	1	0.347817	5.36611	2.06079	0.0680108	0.209162	-5.29027	0	1	ST3GAL4	11	ST3 beta-galactoside alpha-2,3-sialyltransferase 4 [Source:HGNC Symbol;Acc:10864]
ENSG00000110090	0.0989392	6.05905	0.349576	0.734345	0.863541	-7.01384	0	1.21091	6.05905	4.27844	0.001851	0.0151318	-1.64573	1	1	CPT1A	11	carnitine palmitoyltransferase 1A (liver) [Source:HGNC Symbol;Acc:2328]
ENSG00000110104	-1.02729	4.74168	-4.78796	0.000871307	0.00998687	-0.740626	1	-0.383079	4.74168	-1.78544	0.106355	0.283571	-5.70742	0	1	CCDC86	11	coiled-coil domain containing 86 [Source:HGNC Symbol;Acc:28359]
ENSG00000110107	-1.01425	8.49675	-5.29229	0.00042882	0.0063805	0.00080173	1	-0.881854	8.49675	-4.60144	0.00114309	0.0106044	-1.14112	1	2	PRPF19	11	PRP19/PSO4 pre-mRNA processing factor 19 homolog (S. cerevisiae) [Source:HGNC Symbol;Acc:17896]
ENSG00000110172	0.763188	8.56881	3.82351	0.00374049	0.0276234	-2.25531	1	0.121121	8.56881	0.606807	0.558319	0.75611	-7.01803	0	1	CHORDC1	11	cysteine and histidine-rich domain (CHORD) containing 1 [Source:HGNC Symbol;Acc:14525]
ENSG00000110200	-0.566192	5.69216	-2.76583	0.0210148	0.0900502	-4.01256	0	-0.922594	5.69216	-4.50685	0.00131436	0.0118319	-1.28748	1	1	C11orf51	11	chromosome 11 open reading frame 51 [Source:HGNC Symbol;Acc:24531]
ENSG00000110218	1.43942	6.45936	5.1666	0.000509948	0.00705062	-0.180539	1	-0.378981	6.45936	-1.3603	0.205395	0.429488	-6.28774	0	1	PANX1	11	pannexin 1 [Source:HGNC Symbol;Acc:8599]
ENSG00000110328	0.191513	4.00979	0.991525	0.346214	0.57687	-6.56709	0	1.58854	4.00979	8.22437	1.34075e-05	0.00046443	3.53944	1	1	GALNTL4	11	UDP-N-acetyl-alpha-D-galactosamine:polypeptide N-acetylgalactosaminyltransferase-like 4 [Source:HGNC Symbol;Acc:30488]
ENSG00000110347	3.03874	5.2523	3.73127	0.00432832	0.0306024	-2.40593	1	3.51612	5.2523	4.31744	0.00174499	0.014495	-1.58409	1	2	MMP12	11	matrix metallopeptidase 12 (macrophage elastase) [Source:HGNC Symbol;Acc:7158]
ENSG00000110395	-0.620202	5.89984	-3.66103	0.00484051	0.032773	-2.52115	1	-0.0181233	5.89984	-0.106981	0.917048	0.962355	-7.21043	0	1	CBL	11	Cas-Br-M (murine) ecotropic retroviral transforming sequence [Source:HGNC Symbol;Acc:1541]
ENSG00000110435	0.817306	7.97298	5.82943	0.000209687	0.00402402	0.749903	1	0.83854	7.97298	5.98088	0.000172614	0.00272486	0.849396	1	2	PDHX	11	pyruvate dehydrogenase complex, component X [Source:HGNC Symbol;Acc:21350]
ENSG00000110436	0.360604	3.73623	2.56631	0.0293376	0.114269	-4.34377	0	0.753254	3.73623	5.36069	0.000390604	0.00490558	-0.0118793	1	1	SLC1A2	11	solute carrier family 1 (glial high affinity glutamate transporter), member 2 [Source:HGNC Symbol;Acc:10940]
ENSG00000110514	-0.393086	6.54013	-3.67019	0.00477028	0.0324722	-2.5061	0	0.688409	6.54013	6.42758	9.89668e-05	0.00182757	1.43633	1	1	MADD	11	MAP-kinase activating death domain [Source:HGNC Symbol;Acc:6766]
ENSG00000110651	-0.379492	11.0002	-3.18361	0.0105039	0.0552321	-3.31381	0	-0.992325	11.0002	-8.32474	1.21118e-05	0.000438138	3.64588	1	1	CD81	11	CD81 molecule [Source:HGNC Symbol;Acc:1701]
ENSG00000110713	0.314621	7.32729	2.53011	0.0311696	0.119269	-4.40348	0	0.930404	7.32729	7.48209	2.93299e-05	0.000786103	2.71771	1	1	NUP98	11	nucleoporin 98kDa [Source:HGNC Symbol;Acc:8068]
ENSG00000110719	-0.0847399	8.59274	-0.678975	0.513488	0.7203	-6.83336	0	0.721882	8.59274	5.78405	0.000222409	0.00328507	0.581979	1	1	TCIRG1	11	T-cell, immune regulator 1, ATPase, H+ transporting, lysosomal V0 subunit A3 [Source:HGNC Symbol;Acc:11647]
ENSG00000110880	-0.836605	8.32286	-5.80105	0.000217548	0.0041299	0.711364	1	0.25748	8.32286	1.78538	0.106365	0.283571	-5.70751	0	1	CORO1C	12	coronin, actin binding protein, 1C [Source:HGNC Symbol;Acc:2254]
ENSG00000110888	-0.510903	5.7066	-3.77975	0.00400816	0.0289587	-2.32666	0	-0.589012	5.7066	-4.35762	0.00164248	0.0138979	-1.52078	1	1	CAPRIN2	12	caprin family member 2 [Source:HGNC Symbol;Acc:21259]
ENSG00000110925	0.866604	5.03581	8.75348	7.92972e-06	0.000548724	4.15811	1	0.860072	5.03581	8.68749	8.45465e-06	0.000343985	4.02176	1	2	CSRNP2	12	cysteine-serine-rich nuclear protein 2 [Source:HGNC Symbol;Acc:16006]
ENSG00000110931	-1.19164	7.22977	-4.91281	0.000728559	0.0089831	-0.553663	1	-1.48849	7.22977	-6.13666	0.000141758	0.00237391	1.0572	1	2	CAMKK2	12	calcium/calmodulin-dependent protein kinase kinase 2, beta [Source:HGNC Symbol;Acc:1470]
ENSG00000110934	-0.666005	8.53276	-4.86415	0.000780968	0.00937215	-0.626264	1	-0.114856	8.53276	-0.838852	0.422328	0.65413	-6.84345	0	1	BIN2	12	bridging integrator 2 [Source:HGNC Symbol;Acc:1053]
ENSG00000111012	1.60286	4.41662	7.55185	2.71835e-05	0.00114759	2.88351	1	1.97371	4.41662	9.29909	4.73528e-06	0.000233674	4.62584	1	2	CYP27B1	12	cytochrome P450, family 27, subfamily B, polypeptide 1 [Source:HGNC Symbol;Acc:2606]
ENSG00000111052	0.945387	4.51703	4.50943	0.00130934	0.0132883	-1.16562	1	2.27575	4.51703	10.8552	1.23555e-06	0.000108504	6.01337	1	2	LIN7A	12	lin-7 homolog A (C. elegans) [Source:HGNC Symbol;Acc:17787]
ENSG00000111057	-0.192042	3.66042	-0.966447	0.357976	0.586648	-6.59155	0	0.657866	3.66042	3.31069	0.00852743	0.0467891	-3.22783	1	1	KRT18	12	keratin 18 [Source:HGNC Symbol;Acc:6430]
ENSG00000111110	-0.297517	6.71589	-0.927513	0.376813	0.603707	-6.62851	0	1.48782	6.71589	4.63831	0.00108294	0.0102087	-1.08442	1	1	PPM1H	12	protein phosphatase, Mg2+/Mn2+ dependent, 1H [Source:HGNC Symbol;Acc:18583]
ENSG00000111144	-1.80849	10.7328	-11.7122	6.31811e-07	0.000117704	6.71872	1	-1.07008	10.7328	-6.93009	5.4543e-05	0.00120111	2.06457	1	2	LTA4H	12	leukotriene A4 hydrolase [Source:HGNC Symbol;Acc:6710]
ENSG00000111145	0.243226	4.62719	1.42912	0.18528	0.39558	-6.06596	0	1.08814	4.62719	6.39355	0.000103158	0.0018813	1.39257	1	1	ELK3	12	ELK3, ETS-domain protein (SRF accessory protein 2) [Source:HGNC Symbol;Acc:3325]
ENSG00000111203	-0.681525	5.79817	-5.4312	0.000355015	0.00570128	0.198533	1	-0.467131	5.79817	-3.72266	0.00438795	0.0285022	-2.54367	0	1	ITFG2	12	integrin alpha FG-GAP repeat containing 2 [Source:HGNC Symbol;Acc:30879]
ENSG00000111231	-1.19758	7.71232	-4.87324	0.000770883	0.00930818	-0.612681	1	-0.115001	7.71232	-0.467967	0.650447	0.819259	-7.09763	0	1	GPN3	12	GPN-loop GTPase 3 [Source:HGNC Symbol;Acc:30186]
ENSG00000111247	-0.147594	4.59688	-0.541727	0.600584	0.780157	-6.92181	0	-2.06318	4.59688	-7.57267	2.65765e-05	0.000731217	2.82137	1	1	RAD51AP1	12	RAD51 associated protein 1 [Source:HGNC Symbol;Acc:16956]
ENSG00000111275	-0.700663	9.65028	-3.17793	0.0106024	0.0556067	-3.32329	0	-0.765644	9.65028	-3.47266	0.00655247	0.0385811	-2.95746	1	1	ALDH2	12	aldehyde dehydrogenase 2 family (mitochondrial) [Source:HGNC Symbol;Acc:404]
ENSG00000111276	-0.707994	8.14912	-4.72208	0.000958446	0.0106867	-0.840169	1	-0.536324	8.14912	-3.5771	0.005537	0.0337878	-2.784	0	1	CDKN1B	12	cyclin-dependent kinase inhibitor 1B (p27, Kip1) [Source:HGNC Symbol;Acc:1785]
ENSG00000111300	-1.07603	6.45973	-8.93106	6.686e-06	0.000503364	4.33349	1	-0.35294	6.45973	-2.9294	0.015999	0.0749216	-3.86768	0	1	NAA25	12	N(alpha)-acetyltransferase 25, NatB auxiliary subunit [Source:HGNC Symbol;Acc:25783]
ENSG00000111321	-0.651406	7.44026	-4.48844	0.00135075	0.0135591	-1.19808	1	-0.784803	7.44026	-5.4076	0.000366523	0.00467901	0.0551855	1	2	LTBR	12	lymphotoxin beta receptor (TNFR superfamily, member 3) [Source:HGNC Symbol;Acc:6718]
ENSG00000111344	-0.404979	3.65528	-2.78398	0.0203873	0.0882695	-3.98229	0	0.652915	3.65528	4.4884	0.00135084	0.0120494	-1.31616	1	1	RASAL1	12	RAS protein activator like 1 (GAP1 like) [Source:HGNC Symbol;Acc:9873]
ENSG00000111348	-1.0421	11.1289	-4.17896	0.00215364	0.0186257	-1.68345	1	-0.0495798	11.1289	-0.19882	0.846628	0.931143	-7.19502	0	1	ARHGDIB	12	Rho GDP dissociation inhibitor (GDI) beta [Source:HGNC Symbol;Acc:679]
ENSG00000111361	-0.668579	7.69202	-6.21296	0.000128872	0.00291443	1.2595	1	-0.121488	7.69202	-1.12896	0.286845	0.524642	-6.55931	0	1	EIF2B1	12	eukaryotic translation initiation factor 2B, subunit 1 alpha, 26kDa [Source:HGNC Symbol;Acc:3257]
ENSG00000111364	-1.09062	5.68374	-4.80824	0.000846215	0.00980775	-0.710102	1	-0.496324	5.68374	-2.18815	0.0551167	0.181845	-5.08954	0	1	DDX55	12	DEAD (Asp-Glu-Ala-Asp) box polypeptide 55 [Source:HGNC Symbol;Acc:20085]
ENSG00000111371	0.354308	5.34366	0.488329	0.636483	0.80299	-6.95119	0	3.32568	5.34366	4.58366	0.00117337	0.010834	-1.16855	1	1	SLC38A1	12	solute carrier family 38, member 1 [Source:HGNC Symbol;Acc:13447]
ENSG00000111424	0.115923	6.46123	0.927983	0.376582	0.603661	-6.62807	0	1.27548	6.46123	10.2104	2.11072e-06	0.000151323	5.4627	1	1	VDR	12	vitamin D (1,25- dihydroxyvitamin D3) receptor [Source:HGNC Symbol;Acc:12679]
ENSG00000111640	0.769028	12.7507	4.86981	0.000774675	0.00934117	-0.617809	1	0.756945	12.7507	4.7933	0.00086463	0.00862525	-0.848082	1	2	GAPDH	12	glyceraldehyde-3-phosphate dehydrogenase [Source:HGNC Symbol;Acc:4141]
ENSG00000111641	-0.634486	5.78617	-3.41493	0.00719538	0.0425372	-2.92805	1	-0.384774	5.78617	-2.07093	0.0668867	0.207019	-5.27445	0	1	NOP2	12	NOP2 nucleolar protein homolog (yeast) [Source:HGNC Symbol;Acc:7867]
ENSG00000111666	-0.581006	9.10144	-4.66268	0.00104502	0.0113156	-0.930442	0	-1.68755	9.10144	-13.5429	1.72558e-07	3.30431e-05	8.00205	1	1	CHPT1	12	choline phosphotransferase 1 [Source:HGNC Symbol;Acc:17852]
ENSG00000111669	1.45437	9.89148	7.18087	4.09719e-05	0.00145819	2.4565	1	0.724294	9.89148	3.57616	0.00554532	0.0338151	-2.78555	1	2	TPI1	12	triosephosphate isomerase 1 [Source:HGNC Symbol;Acc:12009]
ENSG00000111670	-0.796869	6.53064	-5.00511	0.000639216	0.0082378	-0.416882	1	-0.0519442	6.53064	-0.32626	0.751359	0.876449	-7.15849	0	1	GNPTAB	12	N-acetylglucosamine-1-phosphate transferase, alpha and beta subunits [Source:HGNC Symbol;Acc:29670]
ENSG00000111671	0.65773	6.82804	4.62789	0.00109959	0.0117403	-0.983555	1	1.16018	6.82804	8.16323	1.42706e-05	0.00048722	3.47407	1	2	SPSB2	12	splA/ryanodine receptor domain and SOCS box containing 2 [Source:HGNC Symbol;Acc:29522]
ENSG00000111716	0.422005	11.5997	1.66069	0.129637	0.313625	-5.75323	0	1.23502	11.5997	4.86012	0.000785489	0.00806878	-0.747215	1	1	LDHB	12	lactate dehydrogenase B [Source:HGNC Symbol;Acc:6541]
ENSG00000111731	-0.817928	6.68854	-5.32755	0.00040864	0.0062475	0.0512587	1	-0.200937	6.68854	-1.3088	0.22163	0.449071	-6.35127	0	1	KIAA0528	12	KIAA0528 [Source:HGNC Symbol;Acc:29062]
ENSG00000111801	-1.82747	5.16659	-8.87807	7.03318e-06	0.000511998	4.28148	1	-2.22456	5.16659	-10.8072	1.28457e-06	0.000110391	5.97349	1	2	BTN3A3	6	butyrophilin, subfamily 3, member A3 [Source:HGNC Symbol;Acc:1140]
ENSG00000111817	0.674559	8.23603	3.21214	0.0100223	0.0534937	-3.2661	0	1.30386	8.23603	6.20879	0.000129543	0.00222432	1.15228	1	1	DSE	6	dermatan sulfate epimerase [Source:HGNC Symbol;Acc:21144]
ENSG00000111832	-0.84968	8.28465	-4.38817	0.0015688	0.0149311	-1.35396	1	-0.620642	8.28465	-3.20531	0.0101355	0.0533166	-3.40439	0	1	RWDD1	6	RWD domain containing 1 [Source:HGNC Symbol;Acc:20993]
ENSG00000111845	-0.729664	7.09034	-6.34457	0.000109532	0.0026325	1.42963	1	-0.434663	7.09034	-3.77948	0.00400986	0.0268627	-2.45035	0	1	PAK1IP1	6	PAK1 interacting protein 1 [Source:HGNC Symbol;Acc:20882]
ENSG00000111846	-0.608606	4.51184	-5.30363	0.000422214	0.00634114	0.0170502	1	-0.0396063	4.51184	-0.345145	0.737567	0.86932	-7.1516	0	1	GCNT2	6	glucosaminyl (N-acetyl) transferase 2, I-branching enzyme (I blood group) [Source:HGNC Symbol;Acc:4204]
ENSG00000111860	-0.0929613	4.67026	-0.672283	0.517552	0.722984	-6.83809	0	-1.05107	4.67026	-7.60116	2.57697e-05	0.000716065	2.85377	1	1	C6orf204	6	chromosome 6 open reading frame 204 [Source:HGNC Symbol;Acc:21638]
ENSG00000111863	0.192867	4.09321	1.60782	0.140829	0.332305	-5.82703	0	0.850677	4.09321	7.09163	4.53254e-05	0.00105482	2.2596	1	1	C6orf105	6	chromosome 6 open reading frame 105 [Source:HGNC Symbol;Acc:21214]
ENSG00000111885	-0.624915	5.91361	-2.14392	0.0593023	0.186524	-5.02772	0	-0.986184	5.91361	-3.38333	0.0075746	0.042715	-3.10639	1	1	MAN1A1	6	mannosidase, alpha, class 1A, member 1 [Source:HGNC Symbol;Acc:6821]
ENSG00000111906	-0.646905	7.42913	-4.29676	0.00180038	0.0164083	-1.49724	1	-0.978801	7.42913	-6.50122	9.05172e-05	0.00172767	1.53047	1	2	HDDC2	6	HD domain containing 2 [Source:HGNC Symbol;Acc:21078]
ENSG00000111912	-1.10782	4.58085	-5.04521	0.00060413	0.00791887	-0.357842	1	-0.91925	4.58085	-4.18642	0.0021292	0.0167531	-1.79195	1	2	NCOA7	6	nuclear receptor coactivator 7 [Source:HGNC Symbol;Acc:21081]
ENSG00000111962	0.607501	3.61805	3.33375	0.00821215	0.0466284	-3.06314	1	0.104665	3.61805	0.574362	0.579179	0.770765	-7.03836	0	1	UST	6	uronyl-2-sulfotransferase [Source:HGNC Symbol;Acc:17223]
ENSG00000112078	0.76913	3.99649	4.93618	0.000704741	0.00874942	-0.518918	1	1.29499	3.99649	8.31109	1.22797e-05	0.000440953	3.63146	1	2	KCTD20	6	potassium channel tetramerisation domain containing 20 [Source:HGNC Symbol;Acc:21052]
ENSG00000112079	-0.679071	8.99231	-5.65541	0.000263225	0.00471743	0.511783	1	-0.515636	8.99231	-4.2943	0.00180708	0.0148877	-1.62064	0	1	STK38	6	serine/threonine kinase 38 [Source:HGNC Symbol;Acc:17847]
ENSG00000112096	0.69015	10.3651	3.60021	0.00533533	0.0349285	-2.62127	1	2.02448	10.3651	10.5608	1.57225e-06	0.00012443	5.76599	1	2	SOD2	6	superoxide dismutase 2, mitochondrial [Source:HGNC Symbol;Acc:11180]
ENSG00000112110	0.76641	9.1027	4.66648	0.00103925	0.0112737	-0.924659	1	-0.119723	9.1027	-0.728965	0.483752	0.70131	-6.93237	0	1	MRPL18	6	mitochondrial ribosomal protein L18 [Source:HGNC Symbol;Acc:14477]
ENSG00000112159	-1.16033	5.06066	-7.01099	4.96949e-05	0.00160343	2.25527	1	-0.38649	5.06066	-2.33526	0.0431603	0.15304	-4.85301	0	1	MDN1	6	MDN1, midasin homolog (yeast) [Source:HGNC Symbol;Acc:18302]
ENSG00000112242	0.708366	8.03439	5.82652	0.00021048	0.00403484	0.745951	1	0.0736967	8.03439	0.606177	0.55872	0.756287	-7.01843	0	1	E2F3	6	E2F transcription factor 3 [Source:HGNC Symbol;Acc:3115]
ENSG00000112245	1.10023	8.07092	6.96356	5.24776e-05	0.00166877	2.19843	1	0.356798	8.07092	2.25823	0.0490653	0.167132	-4.97742	0	1	PTP4A1	6	protein tyrosine phosphatase type IVA, member 1 [Source:HGNC Symbol;Acc:9634]
ENSG00000112290	0.368831	4.3126	3.10975	0.0118642	0.0603572	-3.43737	0	1.08406	4.3126	9.14011	5.48857e-06	0.000259228	4.47226	1	1	WASF1	6	WAS protein family, member 1 [Source:HGNC Symbol;Acc:12732]
ENSG00000112297	-0.468719	6.57594	-3.84939	0.00359112	0.0268298	-2.21321	0	1.16744	6.57594	9.58771	3.64097e-06	0.000203628	4.89873	1	1	AIM1	6	absent in melanoma 1 [Source:HGNC Symbol;Acc:356]
ENSG00000112299	2.31019	6.2006	9.76564	3.10653e-06	0.000309733	5.11728	1	2.11065	6.2006	8.92212	6.74324e-06	0.000295512	4.25778	1	2	VNN1	6	vanin 1 [Source:HGNC Symbol;Acc:12705]
ENSG00000112303	1.5129	7.83067	5.5903	0.00028691	0.00497409	0.421559	1	1.59405	7.83067	5.89016	0.000193878	0.00296489	0.726822	1	2	VNN2	6	vanin 2 [Source:HGNC Symbol;Acc:12706]
ENSG00000112306	-0.315266	12.4365	-2.61688	0.0269577	0.107593	-4.26015	0	-0.677388	12.4365	-5.62268	0.000274856	0.00380671	0.358644	1	1	RPS12	6	ribosomal protein S12 [Source:HGNC Symbol;Acc:10385]
ENSG00000112367	-0.830976	8.31507	-3.59631	0.00536884	0.0350897	-2.62771	1	-0.406278	8.31507	-1.7583	0.111067	0.291474	-5.74704	0	1	FIG4	6	FIG4 homolog, SAC1 lipid phosphatase domain containing (S. cerevisiae) [Source:HGNC Symbol;Acc:16873]
ENSG00000112394	1.43396	6.93723	4.12061	0.00235514	0.0198235	-1.77631	1	3.05453	6.93723	8.77745	7.74793e-06	0.000326544	4.1129	1	2	SLC16A10	6	solute carrier family 16, member 10 (aromatic amino acid transporter) [Source:HGNC Symbol;Acc:17027]
ENSG00000112511	0.808899	4.51959	6.92742	5.47116e-05	0.00169693	2.15494	1	0.284505	4.51959	2.4365	0.0364502	0.13622	-4.68788	0	1	PHF1	6	PHD finger protein 1 [Source:HGNC Symbol;Acc:8919]
ENSG00000112514	-0.242206	9.35353	-1.78588	0.106279	0.275261	-5.57348	0	-1.33711	9.35353	-9.85902	2.86096e-06	0.000178097	5.1485	1	1	CUTA	6	cutA divalent cation tolerance homolog (E. coli) [Source:HGNC Symbol;Acc:21101]
ENSG00000112531	-0.697431	7.68185	-5.27009	0.000442078	0.00649549	-0.0310717	1	-0.0867412	7.68185	-0.655453	0.527857	0.734075	-6.98563	0	1	QKI	6	QKI, KH domain containing, RNA binding [Source:HGNC Symbol;Acc:21100]
ENSG00000112561	-0.371665	5.35265	-2.3462	0.0423805	0.147728	-4.70407	0	-0.682486	5.35265	-4.30831	0.00176921	0.0146398	-1.5985	1	1	TFEB	6	transcription factor EB [Source:HGNC Symbol;Acc:11753]
ENSG00000112576	0.343074	5.39143	2.20059	0.0539924	0.174979	-4.93794	0	1.75837	5.39143	11.2788	8.82012e-07	8.72944e-05	6.35812	1	1	CCND3	6	cyclin D3 [Source:HGNC Symbol;Acc:1585]
ENSG00000112640	1.08515	5.24112	9.36257	4.46679e-06	0.000387642	4.74682	1	1.50058	5.24112	12.9469	2.58506e-07	3.95434e-05	7.59903	1	2	PPP2R5D	6	protein phosphatase 2, regulatory subunit B', delta [Source:HGNC Symbol;Acc:9312]
ENSG00000112651	0.244543	4.78737	1.47761	0.172148	0.377124	-6.00283	0	0.679233	4.78737	4.10416	0.00241552	0.0184297	-1.92354	1	1	MRPL2	6	mitochondrial ribosomal protein L2 [Source:HGNC Symbol;Acc:14056]
ENSG00000112658	0.43155	5.72302	3.90585	0.00328654	0.0251189	-2.12158	0	0.592832	5.72302	5.36558	0.000388016	0.00488263	-0.0048733	1	1	SRF	6	serum response factor (c-fos serum response element-binding transcription factor) [Source:HGNC Symbol;Acc:11291]
ENSG00000112659	-0.68361	6.84557	-5.08012	0.000575266	0.00769511	-0.306633	1	-0.703293	6.84557	-5.2264	0.000469467	0.00553958	-0.205633	1	2	CUL9	6	cullin 9 [Source:HGNC Symbol;Acc:15982]
ENSG00000112664	-0.653783	7.83713	-6.06789	0.000154572	0.00330343	1.06919	1	-0.0788493	7.83713	-0.731816	0.48209	0.700162	-6.9302	0	1	NUDT3	6	nudix (nucleoside diphosphate linked moiety X)-type motif 3 [Source:HGNC Symbol;Acc:8050]
ENSG00000112667	-0.865385	9.11477	-4.85979	0.000785857	0.00940519	-0.632785	1	-1.96097	9.11477	-11.0123	1.08886e-06	9.99087e-05	6.14281	1	2	C6orf108	6	chromosome 6 open reading frame 108 [Source:HGNC Symbol;Acc:21218]
ENSG00000112699	-0.414755	5.11631	-1.96225	0.0799201	0.228045	-5.3098	0	-1.03787	5.11631	-4.91026	0.000731209	0.00763586	-0.671941	1	1	GMDS	6	GDP-mannose 4,6-dehydratase [Source:HGNC Symbol;Acc:4369]
ENSG00000112715	1.49912	5.71234	8.50922	1.0073e-05	0.000621965	3.91166	1	1.99116	5.71234	11.3021	8.6606e-07	8.70845e-05	6.37674	1	2	VEGFA	6	vascular endothelial growth factor A [Source:HGNC Symbol;Acc:12680]
ENSG00000112773	-0.669283	7.72435	-4.03003	0.00270853	0.0219747	-1.9213	1	-1.50735	7.72435	-9.07639	5.8266e-06	0.000268128	4.41004	1	2	FAM46A	6	family with sequence similarity 46, member A [Source:HGNC Symbol;Acc:18345]
ENSG00000112799	0.0393637	9.75167	0.259477	0.800849	0.901241	-7.04367	0	-1.61092	9.75167	-10.6188	1.49865e-06	0.000121109	5.81526	1	1	LY86	6	lymphocyte antigen 86 [Source:HGNC Symbol;Acc:16837]
ENSG00000112893	-0.221118	8.42438	-1.59579	0.143495	0.335672	-5.84363	0	-1.08651	8.42438	-7.84123	1.99421e-05	0.000604081	3.12308	1	1	MAN2A1	5	mannosidase, alpha, class 2A, member 1 [Source:HGNC Symbol;Acc:6824]
ENSG00000112972	0.827242	6.248	4.47574	0.00137649	0.0137236	-1.21775	1	-0.389746	6.248	-2.1087	0.0628526	0.198188	-5.21526	0	1	HMGCS1	5	3-hydroxy-3-methylglutaryl-CoA synthase 1 (soluble) [Source:HGNC Symbol;Acc:5007]
ENSG00000112977	-0.41719	6.51832	-3.04085	0.0132964	0.0655406	-3.5527	0	-0.702037	6.51832	-5.11707	0.000546321	0.00617362	-0.365273	1	1	DAP	5	death-associated protein [Source:HGNC Symbol;Acc:2672]
ENSG00000112992	-0.806666	6.69891	-5.15044	0.00052152	0.0071632	-0.204018	1	-0.910776	6.69891	-5.81517	0.000213597	0.00318623	0.624628	1	2	NNT	5	nicotinamide nucleotide transhydrogenase [Source:HGNC Symbol;Acc:7863]
ENSG00000112996	-0.610061	7.45905	-3.79273	0.00392673	0.0286473	-2.30548	1	-0.392754	7.45905	-2.44174	0.0361328	0.135437	-4.6793	0	1	MRPS30	5	mitochondrial ribosomal protein S30 [Source:HGNC Symbol;Acc:8769]
ENSG00000113048	-0.825266	4.72973	-7.30059	3.58312e-05	0.00135459	2.59615	1	-0.791033	4.72973	-6.99775	5.04548e-05	0.00113957	2.14666	1	2	MRPS27	5	mitochondrial ribosomal protein S27 [Source:HGNC Symbol;Acc:14512]
ENSG00000113070	2.9501	6.60656	9.76368	3.11193e-06	0.000309733	5.11551	1	2.36903	6.60656	7.84055	1.99566e-05	0.000604081	3.12232	1	2	HBEGF	5	heparin-binding EGF-like growth factor [Source:HGNC Symbol;Acc:3059]
ENSG00000113108	0.448214	4.98602	2.6982	0.0235294	0.0974188	-4.12518	0	0.968093	4.98602	5.82782	0.000210126	0.00315118	0.641916	1	1	APBB3	5	amyloid beta (A4) precursor protein-binding, family B, member 3 [Source:HGNC Symbol;Acc:20708]
ENSG00000113163	-0.279774	7.30898	-1.61297	0.139702	0.330354	-5.8199	0	-0.592406	7.30898	-3.41538	0.00719003	0.0411745	-3.0529	1	1	COL4A3BP	5	collagen, type IV, alpha 3 (Goodpasture antigen) binding protein [Source:HGNC Symbol;Acc:2205]
ENSG00000113269	-0.575477	11.4053	-4.48357	0.00136056	0.0136187	-1.20562	0	-0.919529	11.4053	-7.1641	4.1754e-05	0.0010016	2.34604	1	1	RNF130	5	ring finger protein 130 [Source:HGNC Symbol;Acc:18280]
ENSG00000113272	-0.247004	4.36736	-1.82332	0.100085	0.264863	-5.51846	0	-1.10969	4.36736	-8.19149	1.38643e-05	0.000476117	3.50434	1	1	THG1L	5	tRNA-histidine guanylyltransferase 1-like (S. cerevisiae) [Source:HGNC Symbol;Acc:26053]
ENSG00000113328	-0.715187	5.99756	-3.36982	0.00774315	0.044769	-3.00307	1	-0.809865	5.99756	-3.81592	0.00378557	0.0256896	-2.39068	1	2	CCNG1	5	cyclin G1 [Source:HGNC Symbol;Acc:1592]
ENSG00000113356	1.01446	3.87343	4.96183	0.000679561	0.00853658	-0.480879	1	1.83614	3.87343	8.98079	6.37723e-06	0.000284025	4.31596	1	2	POLR3G	5	polymerase (RNA) III (DNA directed) polypeptide G (32kD) [Source:HGNC Symbol;Acc:30075]
ENSG00000113369	1.11077	7.54474	5.7156	0.000243202	0.00447699	0.594634	1	0.0216519	7.54474	0.111413	0.913627	0.960965	-7.2099	0	1	ARRDC3	5	arrestin domain containing 3 [Source:HGNC Symbol;Acc:29263]
ENSG00000113407	0.560348	9.18067	4.84876	0.000798377	0.00948332	-0.649302	0	0.91905	9.18067	7.95266	1.77408e-05	0.000557111	3.24584	1	1	TARS	5	threonyl-tRNA synthetase [Source:HGNC Symbol;Acc:11572]
ENSG00000113448	0.401159	3.71728	3.0863	0.012333	0.0621129	-3.47662	0	0.738916	3.71728	5.68481	0.000253233	0.00358042	0.445066	1	1	PDE4D	5	phosphodiesterase 4D, cAMP-specific [Source:HGNC Symbol;Acc:8783]
ENSG00000113504	0.171371	7.11612	0.598939	0.563338	0.755736	-6.88718	0	-1.45742	7.11612	-5.09368	0.000564458	0.00632574	-0.399652	1	1	SLC12A7	5	solute carrier family 12 (potassium/chloride transporters), member 7 [Source:HGNC Symbol;Acc:10915]
ENSG00000113552	-1.1157	7.29726	-6.50654	8.99384e-05	0.00232929	1.63574	1	-1.97093	7.29726	-11.4941	7.46287e-07	7.96808e-05	6.52844	1	2	GNPDA1	5	glucosamine-6-phosphate deaminase 1 [Source:HGNC Symbol;Acc:4417]
ENSG00000113580	0.969297	8.98974	7.2427	3.82233e-05	0.00139811	2.52884	1	1.016	8.98974	7.59166	2.60357e-05	0.000720048	2.84298	1	2	NR3C1	5	nuclear receptor subfamily 3, group C, member 1 (glucocorticoid receptor) [Source:HGNC Symbol;Acc:7978]
ENSG00000113600	1.12484	3.42584	4.40388	0.0015323	0.014711	-1.32945	1	0.438392	3.42584	1.71636	0.118726	0.30463	-5.80764	0	1	C9	5	complement component 9 [Source:HGNC Symbol;Acc:1358]
ENSG00000113615	0.652876	6.63691	4.98453	0.000658071	0.00838313	-0.447281	1	0.193733	6.63691	1.4791	0.171759	0.384038	-6.13508	0	1	SEC24A	5	SEC24 family, member A (S. cerevisiae) [Source:HGNC Symbol;Acc:10703]
ENSG00000113621	0.0218496	7.07289	0.200395	0.845432	0.924977	-7.05851	0	0.752663	7.07289	6.90307	5.62753e-05	0.00122244	2.03162	1	1	TXNDC15	5	thioredoxin domain containing 15 [Source:HGNC Symbol;Acc:20652]
ENSG00000113638	0.566715	4.94203	3.8656	0.00350075	0.0263137	-2.18687	0	0.589653	4.94203	4.02206	0.00274217	0.0202383	-2.05565	1	1	TTC33	5	tetratricopeptide repeat domain 33 [Source:HGNC Symbol;Acc:29959]
ENSG00000113648	-1.07912	11.7919	-10.0167	2.49333e-06	0.000266212	5.34073	1	-0.704805	11.7919	-6.5422	8.61572e-05	0.00166612	1.58254	1	2	H2AFY	5	H2A histone family, member Y [Source:HGNC Symbol;Acc:4740]
ENSG00000113649	-0.629721	7.08921	-3.7041	0.00451938	0.0313951	-2.45045	1	-0.256115	7.08921	-1.5065	0.164714	0.373979	-6.09872	0	1	TCERG1	5	transcription elongation regulator 1 [Source:HGNC Symbol;Acc:15630]
ENSG00000113657	3.27029	4.16488	23.5574	1.08217e-09	5.73442e-06	12.4581	1	0.368899	4.16488	2.65735	0.025193	0.104552	-4.32282	0	1	DPYSL3	5	dihydropyrimidinase-like 3 [Source:HGNC Symbol;Acc:3015]
ENSG00000113742	1.2732	7.84205	6.22014	0.000127728	0.00290045	1.26884	1	0.940255	7.84205	4.59355	0.00115643	0.0107056	-1.1533	1	2	CPEB4	5	cytoplasmic polyadenylation element binding protein 4 [Source:HGNC Symbol;Acc:21747]
ENSG00000113811	0.984851	10.006	8.76545	7.83837e-06	0.00054797	4.17003	1	0.553171	10.006	4.92338	0.000717686	0.00754384	-0.652314	0	1		3	Selenoprotein K [Source:UniProtKB/Swiss-Prot;Acc:Q9Y6D0]
ENSG00000113916	0.88308	7.97999	3.99398	0.00286438	0.0228128	-1.97927	1	1.7684	7.97999	7.99807	1.69209e-05	0.000543343	3.29547	1	2	BCL6	3	B-cell CLL/lymphoma 6 [Source:HGNC Symbol;Acc:1001]
ENSG00000113924	0.769615	3.28057	5.28691	0.000431994	0.00640234	-0.00691927	1	-0.124613	3.28057	-0.856038	0.413222	0.646009	-6.82856	0	1	HGD	3	homogentisate 1,2-dioxygenase [Source:HGNC Symbol;Acc:4892]
ENSG00000113966	1.35362	4.09604	6.17035	0.000135904	0.003023	1.20391	1	0.808573	4.09604	3.68579	0.00465306	0.0298192	-2.60436	1	2	ARL6	3	ADP-ribosylation factor-like 6 [Source:HGNC Symbol;Acc:13210]
ENSG00000114023	1.21663	3.85829	5.94374	0.000180998	0.00368094	0.903961	1	-0.516299	3.85829	-2.52234	0.0315772	0.12302	-4.54667	0	1	FAM162A	3	family with sequence similarity 162, member A [Source:HGNC Symbol;Acc:17865]
ENSG00000114126	1.06718	4.94357	3.44095	0.00689785	0.0413331	-2.88482	1	-0.702227	4.94357	-2.26422	0.048579	0.16592	-4.96779	0	1	TFDP2	3	transcription factor Dp-2 (E2F dimerization partner 2) [Source:HGNC Symbol;Acc:11751]
ENSG00000114251	2.13128	5.19731	7.46034	3.00366e-05	0.00121366	2.77973	1	1.60725	5.19731	5.62604	0.000273638	0.00379642	0.363328	1	2	WNT5A	3	wingless-type MMTV integration site family, member 5A [Source:HGNC Symbol;Acc:12784]
ENSG00000114270	0.533595	4.8863	1.93965	0.0829164	0.233531	-5.34419	0	1.65719	4.8863	6.02401	0.000163402	0.0026265	0.907268	1	1	COL7A1	3	collagen, type VII, alpha 1 [Source:HGNC Symbol;Acc:2214]
ENSG00000114315	1.02651	3.9101	5.30404	0.000421979	0.00634114	0.0176335	1	0.690662	3.9101	3.56871	0.00561219	0.0341402	-2.79791	1	2	HES1	3	hairy and enhancer of split 1, (Drosophila) [Source:HGNC Symbol;Acc:5192]
ENSG00000114388	-1.19613	6.97788	-8.47298	1.04418e-05	0.000637076	3.87457	1	-0.832064	6.97788	-5.89406	0.000192908	0.00295261	0.732114	1	2	NPRL2	3	nitrogen permease regulator-like 2 (S. cerevisiae) [Source:HGNC Symbol;Acc:24969]
ENSG00000114450	-1.10247	6.43352	-5.216	0.000476246	0.00677161	-0.108989	1	-1.73047	6.43352	-8.18717	1.39256e-05	0.00047729	3.49972	1	2	GNB4	3	guanine nucleotide binding protein (G protein), beta polypeptide 4 [Source:HGNC Symbol;Acc:20731]
ENSG00000114473	1.49192	6.70046	8.95944	6.50784e-06	0.000494942	4.36122	1	0.280855	6.70046	1.68662	0.124448	0.313961	-5.85018	0	1	IQCG	3	IQ motif containing G [Source:HGNC Symbol;Acc:25251]
ENSG00000114480	1.55185	8.18638	7.13066	4.33622e-05	0.00149796	2.3974	1	0.733386	8.18638	3.36987	0.00774246	0.04336	-3.12887	1	2	GBE1	3	glucan (1,4-alpha-), branching enzyme 1 [Source:HGNC Symbol;Acc:4180]
ENSG00000114554	-0.192329	4.12973	-1.33154	0.214333	0.432174	-6.18884	0	-0.928206	4.12973	-6.42619	9.91348e-05	0.00182875	1.43454	1	1	PLXNA1	3	plexin A1 [Source:HGNC Symbol;Acc:9099]
ENSG00000114686	-1.13514	8.77248	-7.29263	3.61504e-05	0.00136081	2.58691	1	-0.830494	8.77248	-5.33543	0.00040427	0.00499441	-0.0481188	1	2	MRPL3	3	mitochondrial ribosomal protein L3 [Source:HGNC Symbol;Acc:10379]
ENSG00000114737	1.68456	6.37692	7.33863	3.43487e-05	0.00133813	2.64014	1	1.86129	6.37692	8.1085	1.50948e-05	0.000505561	3.41522	1	2	CISH	3	cytokine inducible SH2-containing protein [Source:HGNC Symbol;Acc:1984]
ENSG00000114767	-1.16728	4.927	-5.03834	0.000609992	0.00797198	-0.367942	1	-0.289614	4.927	-1.25007	0.241437	0.472981	-6.42164	0	1	RRP9	3	ribosomal RNA processing 9, small subunit (SSU) processome component, homolog (yeast) [Source:HGNC Symbol;Acc:16829]
ENSG00000114770	-1.11462	7.09363	-6.72881	6.899e-05	0.00193227	1.91284	1	-2.14831	7.09363	-12.9691	2.54579e-07	3.95434e-05	7.61435	1	2	ABCC5	3	ATP-binding cassette, sub-family C (CFTR/MRP), member 5 [Source:HGNC Symbol;Acc:56]
ENSG00000114784	1.63049	10.0823	7.0851	4.56632e-05	0.00154405	2.3435	1	0.694488	10.0823	3.01782	0.0138138	0.0670591	-3.71918	0	1	EIF1B	3	eukaryotic translation initiation factor 1B [Source:HGNC Symbol;Acc:30792]
ENSG00000114850	-0.408235	7.30516	-3.86873	0.00348356	0.0262264	-2.18178	0	-1.05162	7.30516	-9.96593	2.60563e-06	0.000169385	5.24519	1	1	SSR3	3	signal sequence receptor, gamma (translocon-associated protein gamma) [Source:HGNC Symbol;Acc:11325]
ENSG00000114857	-0.648002	8.69067	-4.05443	0.00260813	0.0213986	-1.88215	1	-0.545718	8.69067	-3.41446	0.00720086	0.041189	-3.05444	0	1	NKTR	3	natural killer-tumor recognition sequence [Source:HGNC Symbol;Acc:7833]
ENSG00000114861	0.364252	6.9244	1.60659	0.1411	0.332631	-5.82873	0	-0.740963	6.9244	-3.26813	0.00914245	0.0494664	-3.29908	1	1	FOXP1	3	forkhead box P1 [Source:HGNC Symbol;Acc:3823]
ENSG00000114904	-0.0644673	7.32337	-0.560113	0.588473	0.773551	-6.91104	0	0.590404	7.32337	5.12962	0.000536849	0.00608601	-0.346861	1	1	NEK4	3	NIMA (never in mitosis gene a)-related kinase 4 [Source:HGNC Symbol;Acc:11399]
ENSG00000115008	4.69826	8.89628	6.7061	7.08645e-05	0.00196602	1.88484	1	6.04888	8.89628	8.63392	8.90886e-06	0.000359148	3.9671	1	2	IL1A	2	interleukin 1, alpha [Source:HGNC Symbol;Acc:5991]
ENSG00000115009	6.30622	7.37973	11.3445	8.3789e-07	0.000139256	6.43799	1	2.57679	7.37973	4.63549	0.0010874	0.0102251	-1.08874	1	2	CCL20	2	chemokine (C-C motif) ligand 20 [Source:HGNC Symbol;Acc:10619]
ENSG00000115053	-0.897917	10.8391	-6.75378	6.69905e-05	0.00188526	1.94356	1	-0.724992	10.8391	-5.4531	0.000344686	0.0044584	0.119935	1	2	NCL	2	nucleolin [Source:HGNC Symbol;Acc:7667]
ENSG00000115073	0.739616	7.47856	4.75064	0.000919579	0.0104249	-0.796942	1	0.336605	7.47856	2.16205	0.0575507	0.187037	-5.13101	0	1	ACTR1B	2	ARP1 actin-related protein 1 homolog B, centractin beta (yeast) [Source:HGNC Symbol;Acc:168]
ENSG00000115129	-0.431984	7.41993	-2.28994	0.0465445	0.15793	-4.79492	0	-1.76268	7.41993	-9.34396	4.54374e-06	0.000229361	4.66876	1	1	TP53I3	2	tumor protein p53 inducible protein 3 [Source:HGNC Symbol;Acc:19373]
ENSG00000115159	0.308009	7.47768	1.56318	0.150947	0.346299	-5.88829	0	1.13128	7.47768	5.74135	0.000235144	0.00340388	0.523243	1	1	GPD2	2	glycerol-3-phosphate dehydrogenase 2 (mitochondrial) [Source:HGNC Symbol;Acc:4456]
ENSG00000115165	0.713991	8.67219	4.18736	0.00212613	0.0185167	-1.6701	1	1.99635	8.67219	11.708	6.33797e-07	7.25039e-05	6.69458	1	2	CYTIP	2	cytohesin 1 interacting protein [Source:HGNC Symbol;Acc:9506]
ENSG00000115170	0.496917	6.9126	2.9084	0.0165678	0.0763871	-3.7744	0	0.641039	6.9126	3.75194	0.00418868	0.0277101	-2.49555	1	1	ACVR1	2	activin A receptor, type I [Source:HGNC Symbol;Acc:171]
ENSG00000115194	0.252076	4.51828	1.80397	0.103244	0.270541	-5.54697	0	1.254	4.51828	8.97418	6.41735e-06	0.000284056	4.30942	1	1	SLC30A3	2	solute carrier family 30 (zinc transporter), member 3 [Source:HGNC Symbol;Acc:11014]
ENSG00000115207	-0.640226	5.93133	-5.22984	0.000467241	0.0066997	-0.0890113	1	-0.176537	5.93133	-1.44208	0.181688	0.398117	-6.18352	0	1	GTF3C2	2	general transcription factor IIIC, polypeptide 2, beta 110kDa [Source:HGNC Symbol;Acc:4665]
ENSG00000115216	0.930249	7.48833	9.81545	2.97278e-06	0.000299266	5.16205	1	1.00163	7.48833	10.5686	1.56213e-06	0.00012443	5.77263	1	2	NRBP1	2	nuclear receptor binding protein 1 [Source:HGNC Symbol;Acc:7993]
ENSG00000115226	2.50108	4.11054	15.8817	4.07624e-08	2.48272e-05	9.35075	1	0.181038	4.11054	1.14958	0.278666	0.515821	-6.5366	0	1	FNDC4	2	fibronectin type III domain containing 4 [Source:HGNC Symbol;Acc:20239]
ENSG00000115232	-0.357103	3.9509	-2.61701	0.0269518	0.107593	-4.25993	0	-0.692273	3.9509	-5.07328	0.000580808	0.00647191	-0.429705	1	1	ITGA4	2	integrin, alpha 4 (antigen CD49D, alpha 4 subunit of VLA-4 receptor) [Source:HGNC Symbol;Acc:6140]
ENSG00000115241	-0.630405	7.27683	-4.26893	0.00187787	0.0169232	-1.54106	1	-0.182784	7.27683	-1.23776	0.245766	0.477888	-6.4361	0	1	PPM1G	2	protein phosphatase, Mg2+/Mn2+ dependent, 1G [Source:HGNC Symbol;Acc:9278]
ENSG00000115286	-0.681901	7.95955	-6.04645	0.000158819	0.00336288	1.04081	1	-0.521735	7.95955	-4.62625	0.00110223	0.0103232	-1.10295	0	1	NDUFS7	19	NADH dehydrogenase (ubiquinone) Fe-S protein 7, 20kDa (NADH-coenzyme Q reductase) [Source:HGNC Symbol;Acc:7714]
ENSG00000115289	-0.734884	4.9391	-6.30374	0.000115171	0.00270507	1.37711	1	-0.0825446	4.9391	-0.708057	0.496055	0.710417	-6.94803	0	1	PCGF1	2	polycomb group ring finger 1 [Source:HGNC Symbol;Acc:17615]
ENSG00000115317	-0.847757	5.76085	-5.49193	0.000327156	0.00543727	0.284101	1	-0.536678	5.76085	-3.4767	0.00650977	0.0383682	-2.95073	0	1	HTRA2	2	HtrA serine peptidase 2 [Source:HGNC Symbol;Acc:14348]
ENSG00000115350	-0.45288	7.53256	-3.16105	0.0109015	0.0567359	-3.35154	0	-0.732537	7.53256	-5.11301	0.000549426	0.00619392	-0.37124	1	1	POLE4	2	polymerase (DNA-directed), epsilon 4 (p12 subunit) [Source:HGNC Symbol;Acc:18755]
ENSG00000115355	-0.783904	8.22238	-4.65015	0.00106434	0.0114752	-0.94956	1	-0.136502	8.22238	-0.809733	0.438069	0.66616	-6.86807	0	1	CCDC88A	2	coiled-coil domain containing 88A [Source:HGNC Symbol;Acc:25523]
ENSG00000115364	-0.605142	7.74216	-4.97736	0.00066478	0.00843763	-0.457887	1	-0.34566	7.74216	-2.84309	0.0184725	0.0832951	-4.01245	0	1	MRPL19	2	mitochondrial ribosomal protein L19 [Source:HGNC Symbol;Acc:14052]
ENSG00000115368	-0.560769	7.40055	-2.25944	0.0489666	0.163566	-4.84393	0	-0.914255	7.40055	-3.6837	0.00466862	0.0298972	-2.60781	1	1	WDR75	2	WD repeat domain 75 [Source:HGNC Symbol;Acc:25725]
ENSG00000115392	-0.600511	5.81717	-5.58257	0.000289868	0.00499179	0.410817	1	0.429224	5.81717	3.99023	0.00288112	0.0210521	-2.10709	0	1	FANCL	2	Fanconi anemia, complementation group L [Source:HGNC Symbol;Acc:20748]
ENSG00000115484	-0.28413	9.94084	-2.52447	0.0314649	0.119961	-4.41276	0	-0.637937	9.94084	-5.66801	0.000258891	0.00364579	0.421757	1	1	CCT4	2	chaperonin containing TCP1, subunit 4 (delta) [Source:HGNC Symbol;Acc:1617]
ENSG00000115520	0.621299	7.73995	6.03995	0.000160133	0.00338663	1.03219	1	0.792959	7.73995	7.70874	2.2956e-05	0.000659106	2.97527	1	2	COQ10B	2	coenzyme Q10 homolog B (S. cerevisiae) [Source:HGNC Symbol;Acc:25819]
ENSG00000115525	-1.5863	6.14044	-7.04737	4.7669e-05	0.00155804	2.29868	1	-0.294777	6.14044	-1.30959	0.221371	0.44872	-6.3503	0	1	ST3GAL5	2	ST3 beta-galactoside alpha-2,3-sialyltransferase 5 [Source:HGNC Symbol;Acc:10872]
ENSG00000115548	0.839692	8.58327	6.12851	0.000143214	0.00313028	1.14907	1	0.121529	8.58327	0.886982	0.397169	0.631679	-6.80111	0	1	KDM3A	2	lysine (K)-specific demethylase 3A [Source:HGNC Symbol;Acc:20815]
ENSG00000115596	1.55128	4.9271	4.63883	0.00108211	0.0116029	-0.966835	1	3.34584	4.9271	10.0052	2.51828e-06	0.000165838	5.28043	1	2	WNT6	2	wingless-type MMTV integration site family, member 6 [Source:HGNC Symbol;Acc:12785]
ENSG00000115758	-0.957489	6.95081	-6.76277	6.62856e-05	0.0018714	1.95461	1	-1.27492	6.95081	-9.00477	6.23393e-06	0.000281598	4.33964	1	2	ODC1	2	ornithine decarboxylase 1 [Source:HGNC Symbol;Acc:8109]
ENSG00000115761	-0.58501	4.42156	-4.33552	0.00169804	0.0157196	-1.43636	1	0.0210744	4.42156	0.156182	0.879185	0.944367	-7.20332	0	1	NOL10	2	nucleolar protein 10 [Source:HGNC Symbol;Acc:25862]
ENSG00000115816	-0.710596	9.46783	-5.17681	0.000502776	0.00701299	-0.165718	1	-0.799767	9.46783	-5.82644	0.000210501	0.00315217	0.640032	1	2	CEBPZ	2	CCAAT/enhancer binding protein (C/EBP), zeta [Source:HGNC Symbol;Acc:24218]
ENSG00000115828	-0.83253	7.13226	-2.92687	0.0160664	0.074689	-3.7435	0	1.6909	7.13226	5.94461	0.000180797	0.00280625	0.800528	1	1	QPCT	2	glutaminyl-peptide cyclotransferase [Source:HGNC Symbol;Acc:9753]
ENSG00000115840	-0.617641	3.72489	-5.58828	0.00028768	0.00497844	0.418752	1	0.018693	3.72489	0.16913	0.869271	0.940313	-7.20101	0	1	SLC25A12	2	solute carrier family 25 (mitochondrial carrier, Aralar), member 12 [Source:HGNC Symbol;Acc:10982]
ENSG00000115866	0.564994	8.84991	5.87436	0.000197862	0.00387363	0.810683	0	-0.612731	8.84991	-6.37069	0.000106081	0.00192266	1.36309	1	1	DARS	2	aspartyl-tRNA synthetase [Source:HGNC Symbol;Acc:2678]
ENSG00000115875	-0.830113	9.74537	-7.46577	2.98584e-05	0.00121366	2.78592	1	-0.600973	9.74537	-5.40496	0.000367837	0.00469238	0.0514151	1	2	SRSF7	2	serine/arginine-rich splicing factor 7 [Source:HGNC Symbol;Acc:10789]
ENSG00000115896	0.107769	5.16574	0.387174	0.70723	0.847166	-6.99884	0	1.65674	5.16574	5.95203	0.000179087	0.0027967	0.81055	1	1	PLCL1	2	phospholipase C-like 1 [Source:HGNC Symbol;Acc:9063]
ENSG00000115904	-0.619452	6.44506	-3.47289	0.00655005	0.0401086	-2.83182	1	-0.217618	6.44506	-1.22005	0.252109	0.485453	-6.45672	0	1	SOS1	2	son of sevenless homolog 1 (Drosophila) [Source:HGNC Symbol;Acc:11187]
ENSG00000115919	0.686675	10.8949	5.0818	0.000573913	0.00768869	-0.304172	1	2.18905	10.8949	16.2002	3.40127e-08	1.46147e-05	9.58641	1	2	KYNU	2	kynureninase [Source:HGNC Symbol;Acc:6469]
ENSG00000115935	-1.49213	6.67993	-8.96632	6.46544e-06	0.000494942	4.36793	1	-0.668173	6.67993	-4.01509	0.00277198	0.0204156	-2.06691	1	2	WIPF1	2	WAS/WASL interacting protein family, member 1 [Source:HGNC Symbol;Acc:12736]
ENSG00000115947	-0.602974	6.3538	-4.577	0.00118494	0.0123814	-1.06154	1	0.0223055	6.3538	0.169315	0.86913	0.940313	-7.20098	0	1	ORC4	2	origin recognition complex, subunit 4 [Source:HGNC Symbol;Acc:8490]
ENSG00000115963	1.46213	4.20163	4.74912	0.000921603	0.0104344	-0.799238	1	1.45928	4.20163	4.73988	0.000934026	0.00915314	-0.929164	1	2	RND3	2	Rho family GTPase 3 [Source:HGNC Symbol;Acc:671]
ENSG00000115970	-0.912976	5.76692	-4.81531	0.000837652	0.0097458	-0.699476	1	-0.733946	5.76692	-3.87106	0.00347087	0.0241018	-2.30063	1	2	THADA	2	thyroid adenoma associated [Source:HGNC Symbol;Acc:19217]
ENSG00000116005	-0.242357	6.31446	-0.976809	0.353081	0.582532	-6.58151	0	1.04387	6.31446	4.20725	0.00206257	0.0163603	-1.75876	1	1	PCYOX1	2	prenylcysteine oxidase 1 [Source:HGNC Symbol;Acc:20588]
ENSG00000116016	0.178496	6.77668	1.01797	0.334126	0.564086	-6.54075	0	-1.06063	6.77668	-6.04878	0.000158352	0.00256169	0.940393	1	1	EPAS1	2	endothelial PAS domain protein 1 [Source:HGNC Symbol;Acc:3374]
ENSG00000116017	0.778596	7.96221	5.19662	0.000489173	0.00687373	-0.137017	1	-0.607155	7.96221	-4.05236	0.00261649	0.0194821	-2.0068	1	2	ARID3A	19	AT rich interactive domain 3A (BRIGHT-like) [Source:HGNC Symbol;Acc:3031]
ENSG00000116096	0.620744	6.02178	3.76146	0.00412589	0.0295952	-2.35653	1	0.128693	6.02178	0.77983	0.454638	0.678874	-6.89257	0	1	SPR	2	sepiapterin reductase (7,8-dihydrobiopterin:NADP+ oxidoreductase) [Source:HGNC Symbol;Acc:11257]
ENSG00000116120	-1.15134	5.71997	-7.25935	3.75179e-05	0.00137986	2.54824	1	-0.280427	5.71997	-1.76813	0.109338	0.288642	-5.73272	0	1	FARSB	2	phenylalanyl-tRNA synthetase, beta subunit [Source:HGNC Symbol;Acc:17800]
ENSG00000116205	-0.640125	4.50738	-4.97508	0.000666928	0.00845271	-0.46126	1	-0.03654	4.50738	-0.28399	0.782562	0.894349	-7.17255	0	1	TCEANC2	1	transcription elongation factor A (SII) N-terminal and central domain containing 2 [Source:HGNC Symbol;Acc:26494]
ENSG00000116251	-0.525866	9.64768	-3.32591	0.00831795	0.0470867	-3.0762	0	-1.04938	9.64768	-6.63695	7.69237e-05	0.00152953	1.7021	1	1	RPL22	1	ribosomal protein L22 [Source:HGNC Symbol;Acc:10315]
ENSG00000116260	0.244273	7.09875	1.26908	0.234871	0.456677	-6.26438	0	1.71802	7.09875	8.92568	6.7204e-06	0.000295245	4.26132	1	1	QSOX1	1	quiescin Q6 sulfhydryl oxidase 1 [Source:HGNC Symbol;Acc:9756]
ENSG00000116273	0.93786	7.2437	5.38286	0.000379019	0.00593888	0.130033	1	0.889073	7.2437	5.10284	0.000557281	0.00625725	-0.386183	1	2	PHF13	1	PHD finger protein 13 [Source:HGNC Symbol;Acc:22983]
ENSG00000116285	2.54818	5.31774	6.86353	5.89189e-05	0.00175889	2.07762	1	0.808315	5.31774	2.1772	0.0561256	0.183923	-5.10696	0	1	ERRFI1	1	ERBB receptor feedback inhibitor 1 [Source:HGNC Symbol;Acc:18185]
ENSG00000116353	-0.747506	4.34297	-4.63571	0.00108706	0.0116486	-0.971601	1	-0.543156	4.34297	-3.36842	0.0077608	0.0434444	-3.1313	0	1	MECR	1	mitochondrial trans-2-enoyl-CoA reductase [Source:HGNC Symbol;Acc:19691]
ENSG00000116574	1.24897	8.3788	6.08276	0.0001517	0.00325517	1.08882	1	1.90851	8.3788	9.29486	4.75376e-06	0.00023393	4.62179	1	2	RHOU	1	ras homolog gene family, member U [Source:HGNC Symbol;Acc:17794]
ENSG00000116649	-1.0919	7.14592	-6.27154	0.000119842	0.00277432	1.33552	1	-0.599648	7.14592	-3.44418	0.00686176	0.0398299	-3.00488	1	2	SRM	1	spermidine synthase [Source:HGNC Symbol;Acc:11296]
ENSG00000116667	1.05023	5.69025	4.1619	0.0022106	0.0189879	-1.71056	1	0.958336	5.69025	3.79773	0.00389586	0.0262235	-2.42046	1	2	C1orf21	1	chromosome 1 open reading frame 21 [Source:HGNC Symbol;Acc:15494]
ENSG00000116670	0.84209	7.584	7.28898	3.62978e-05	0.00136245	2.58268	1	1.21603	7.584	10.5257	1.61872e-06	0.000126742	5.73604	1	2	MAD2L2	1	MAD2 mitotic arrest deficient-like 2 (yeast) [Source:HGNC Symbol;Acc:6764]
ENSG00000116711	0.130352	6.9198	0.594633	0.566096	0.757602	-6.8899	0	-0.992898	6.9198	-4.52934	0.0012713	0.0115386	-1.25257	1	1	PLA2G4A	1	phospholipase A2, group IVA (cytosolic, calcium-dependent) [Source:HGNC Symbol;Acc:9035]
ENSG00000116717	2.68539	7.41677	12.6691	3.1391e-07	8.68473e-05	7.40753	1	0.197621	7.41677	0.932337	0.374441	0.612893	-6.75941	0	1	GADD45A	1	growth arrest and DNA-damage-inducible, alpha [Source:HGNC Symbol;Acc:4095]
ENSG00000116729	0.396037	5.4077	2.15143	0.0585703	0.185016	-5.01586	0	-0.983071	5.4077	-5.34043	0.000401524	0.00498304	-0.0409366	1	1	WLS	1	wntless homolog (Drosophila) [Source:HGNC Symbol;Acc:30238]
ENSG00000116731	1.11756	7.12557	8.60063	9.20451e-06	0.000598361	4.00461	1	0.8828	7.12557	6.79393	6.39057e-05	0.00133234	1.89759	1	2	PRDM2	1	PR domain containing 2, with ZNF domain [Source:HGNC Symbol;Acc:9347]
ENSG00000116741	2.56997	10.4404	5.703	0.000247253	0.00453735	0.577332	1	0.56272	10.4404	1.24873	0.241905	0.47325	-6.42322	0	1	RGS2	1	regulator of G-protein signaling 2, 24kDa [Source:HGNC Symbol;Acc:9998]
ENSG00000116830	-1.20523	5.87829	-8.77034	7.8014e-06	0.000547559	4.17489	1	-0.595237	5.87829	-4.33148	0.00170841	0.0142843	-1.56194	1	2	TTF2	1	transcription termination factor, RNA polymerase II [Source:HGNC Symbol;Acc:12398]
ENSG00000116857	0.23512	6.64725	1.45042	0.179409	0.387334	-6.03839	0	-0.674239	6.64725	-4.15927	0.00221949	0.0172402	-1.83528	1	1	TMEM9	1	transmembrane protein 9 [Source:HGNC Symbol;Acc:18823]
ENSG00000116874	-0.464358	4.75454	-3.0939	0.0121789	0.06166	-3.46389	0	-0.902565	4.75454	-6.01356	0.000165582	0.00264707	0.893279	1	1	WARS2	1	tryptophanyl tRNA synthetase 2, mitochondrial [Source:HGNC Symbol;Acc:12730]
ENSG00000116898	-0.516785	9.15643	-4.10409	0.00241579	0.0202128	-1.80269	0	-0.764357	9.15643	-6.0702	0.000154122	0.00251103	0.968963	1	1	MRPS15	1	mitochondrial ribosomal protein S15 [Source:HGNC Symbol;Acc:14504]
ENSG00000116918	0.606736	8.75259	4.66696	0.00103851	0.0112737	-0.923921	1	0.573588	8.75259	4.41199	0.00151382	0.0131179	-1.43543	0	1	TSNAX	1	translin-associated factor X [Source:HGNC Symbol;Acc:12380]
ENSG00000116922	-0.592074	4.69488	-5.09136	0.000566292	0.00759815	-0.290187	1	-0.122124	4.69488	-1.05017	0.319835	0.560651	-6.64313	0	1	C1orf109	1	chromosome 1 open reading frame 109 [Source:HGNC Symbol;Acc:26039]
ENSG00000116957	-0.776609	6.43014	-7.07401	4.62428e-05	0.00154584	2.33035	1	-0.62857	6.43014	-5.72556	0.000240051	0.00344942	0.501453	1	2	TBCE	1	tubulin folding cofactor E [Source:HGNC Symbol;Acc:11582]
ENSG00000116962	0.160523	5.54253	0.674232	0.516367	0.722366	-6.83672	0	-0.796664	5.54253	-3.34616	0.00804757	0.0447181	-3.1685	1	1	NID1	1	nidogen 1 [Source:HGNC Symbol;Acc:7821]
ENSG00000116977	1.21347	7.13464	8.80668	7.53242e-06	0.000535075	4.21098	1	-0.505137	7.13464	-3.66599	0.00480235	0.0304766	-2.63701	0	1	LGALS8	1	lectin, galactoside-binding, soluble, 8 [Source:HGNC Symbol;Acc:6569]
ENSG00000117000	0.963116	6.10314	6.88979	5.71487e-05	0.00173584	2.10946	1	0.540257	6.10314	3.86481	0.00350511	0.0242726	-2.31082	0	1	RLF	1	rearranged L-myc fusion [Source:HGNC Symbol;Acc:10025]
ENSG00000117009	0.0557404	8.71303	0.322156	0.75437	0.874727	-7.02383	0	2.91465	8.71303	16.8454	2.38085e-08	1.23363e-05	9.92576	1	1	KMO	1	kynurenine 3-monooxygenase (kynurenine 3-hydroxylase) [Source:HGNC Symbol;Acc:6381]
ENSG00000117016	1.27643	5.69622	7.50504	2.8604e-05	0.00118568	2.83056	1	2.82397	5.69622	16.6042	2.7164e-08	1.2759e-05	9.80072	1	2	RIMS3	1	regulating synaptic membrane exocytosis 3 [Source:HGNC Symbol;Acc:21292]
ENSG00000117054	-0.682435	6.74878	-5.18522	0.000496956	0.00696489	-0.153534	1	-0.658989	6.74878	-5.00707	0.000637456	0.00691081	-0.527633	1	2	ACADM	1	acyl-CoA dehydrogenase, C-4 to C-12 straight chain [Source:HGNC Symbol;Acc:89]
ENSG00000117090	2.41749	5.31688	9.97402	2.58736e-06	0.000272943	5.30316	1	1.17057	5.31688	4.8295	0.000820751	0.00833382	-0.793363	1	2	SLAMF1	1	signaling lymphocytic activation molecule family member 1 [Source:HGNC Symbol;Acc:10903]
ENSG00000117091	0.825931	9.36376	5.28601	0.00043253	0.00640234	-0.00821632	1	0.859919	9.36376	5.50354	0.000322106	0.00426979	0.191363	1	2	CD48	1	CD48 molecule [Source:HGNC Symbol;Acc:1683]
ENSG00000117151	0.0662601	7.79419	0.470993	0.648362	0.810833	-6.9601	0	0.774772	7.79419	5.50727	0.0003205	0.00425407	0.196634	1	1	CTBS	1	chitobiase, di-N-acetyl- [Source:HGNC Symbol;Acc:2496]
ENSG00000117154	-0.0915518	3.22405	-0.409984	0.690985	0.836461	-6.98902	0	0.861086	3.22405	3.85608	0.00355351	0.0244826	-2.32506	1	1	IGSF21	1	immunoglobin superfamily, member 21 [Source:HGNC Symbol;Acc:28246]
ENSG00000117226	0.158021	6.49775	0.733591	0.481056	0.694796	-6.79313	0	-1.1829	6.49775	-5.49144	0.000327371	0.00431361	0.174271	1	1	GBP3	1	guanylate binding protein 3 [Source:HGNC Symbol;Acc:4184]
ENSG00000117280	1.18092	8.61242	6.71647	7.00018e-05	0.00194822	1.89764	1	2.32852	8.61242	13.2434	2.10979e-07	3.72468e-05	7.80199	1	2	RAB7L1	1	RAB7, member RAS oncogene family-like 1 [Source:HGNC Symbol;Acc:9789]
ENSG00000117308	-0.320063	4.74218	-1.76842	0.109287	0.280359	-5.59895	0	-0.634483	4.74218	-3.50566	0.00621211	0.0370101	-2.90256	1	1	GALE	1	UDP-galactose-4-epimerase [Source:HGNC Symbol;Acc:4116]
ENSG00000117318	-0.65256	9.47855	-1.70652	0.120592	0.298925	-5.68821	0	1.42632	9.47855	3.73001	0.004337	0.0283191	-2.53158	1	1	ID3	1	inhibitor of DNA binding 3, dominant negative helix-loop-helix protein [Source:HGNC Symbol;Acc:5362]
ENSG00000117362	-0.657943	7.24689	-5.60243	0.000282327	0.00491477	0.438421	1	-0.422901	7.24689	-3.60104	0.0053283	0.032838	-2.74436	0	1	APH1A	1	anterior pharynx defective 1 homolog A (C. elegans) [Source:HGNC Symbol;Acc:29509]
ENSG00000117394	1.97431	5.22581	9.90653	2.74426e-06	0.000283664	5.24336	1	0.990389	5.22581	4.96949	0.000672226	0.00719915	-0.583499	1	2	SLC2A1	1	solute carrier family 2 (facilitated glucose transporter), member 1 [Source:HGNC Symbol;Acc:11005]
ENSG00000117395	-0.671623	5.55863	-5.38588	0.00037747	0.00592681	0.134322	1	-0.310272	5.55863	-2.48813	0.0334364	0.128445	-4.60307	0	1	EBNA1BP2	1	EBNA1 binding protein 2 [Source:HGNC Symbol;Acc:15531]
ENSG00000117525	4.02283	5.90493	8.25343	1.30175e-05	0.000722232	3.64688	1	0.557934	5.90493	1.14469	0.28059	0.517554	-6.54202	0	1	F3	1	coagulation factor III (thromboplastin, tissue factor) [Source:HGNC Symbol;Acc:3541]
ENSG00000117543	-0.87377	5.03005	-5.10357	0.000556713	0.00749949	-0.27234	1	-1.22744	5.03005	-7.16932	4.15086e-05	0.00100013	2.35224	1	2	DPH5	1	DPH5 homolog (S. cerevisiae) [Source:HGNC Symbol;Acc:24270]
ENSG00000117592	0.178762	9.60245	1.44838	0.179964	0.388104	-6.04104	0	-0.795619	9.60245	-6.44635	9.67356e-05	0.00181209	1.46039	1	1	PRDX6	1	peroxiredoxin 6 [Source:HGNC Symbol;Acc:16753]
ENSG00000117594	0.99812	4.81121	4.62242	0.00110843	0.0118122	-0.99191	1	1.28368	4.81121	5.94487	0.000180735	0.00280625	0.800885	1	2	HSD11B1	1	hydroxysteroid (11-beta) dehydrogenase 1 [Source:HGNC Symbol;Acc:5208]
ENSG00000117632	-0.0358754	4.41673	-0.129558	0.899641	0.95365	-7.07131	0	-1.02729	4.41673	-3.70988	0.00447797	0.0289286	-2.56468	1	1	STMN1	1	stathmin 1 [Source:HGNC Symbol;Acc:6510]
ENSG00000117643	-0.621247	3.98396	-2.28448	0.0469692	0.158851	-4.80371	0	-1.16593	3.98396	-4.28743	0.00182597	0.0149898	-1.6315	1	1	MAN1C1	1	mannosidase, alpha, class 1C, member 1 [Source:HGNC Symbol;Acc:19080]
ENSG00000117682	-0.596755	4.95703	-3.61924	0.00517512	0.0342744	-2.58992	1	-0.317119	4.95703	-1.92328	0.0851534	0.244244	-5.50183	0	1	DHDDS	1	dehydrodolichyl diphosphate synthase [Source:HGNC Symbol;Acc:20603]
ENSG00000117697	-1.08045	5.40262	-7.05513	4.72492e-05	0.00154952	2.3079	1	-0.042753	5.40262	-0.279169	0.786148	0.895891	-7.17403	0	1	NSL1	1	NSL1, MIND kinetochore complex component, homolog (S. cerevisiae) [Source:HGNC Symbol;Acc:24548]
ENSG00000117859	-0.647643	8.53288	-4.24589	0.00194474	0.0173823	-1.57744	1	-0.560815	8.53288	-3.67665	0.00472138	0.0301583	-2.61943	0	1	OSBPL9	1	oxysterol binding protein-like 9 [Source:HGNC Symbol;Acc:16386]
ENSG00000118197	0.173987	6.71063	1.41145	0.190278	0.402514	-6.08864	0	1.09858	6.71063	8.91207	6.80822e-06	0.000296149	4.24778	1	1	DDX59	1	DEAD (Asp-Glu-Ala-Asp) box polypeptide 59 [Source:HGNC Symbol;Acc:25360]
ENSG00000118257	0.292852	5.70474	2.61439	0.0270703	0.107969	-4.26428	0	-0.767165	5.70474	-6.84873	5.99426e-05	0.00127537	1.96508	1	1	NRP2	2	neuropilin 2 [Source:HGNC Symbol;Acc:8005]
ENSG00000118292	0.30534	9.40063	1.82238	0.100237	0.265107	-5.51986	0	0.639411	9.40063	3.81623	0.00378371	0.0256869	-2.39018	1	1	C1orf54	1	chromosome 1 open reading frame 54 [Source:HGNC Symbol;Acc:26258]
ENSG00000118308	-1.01506	6.31553	-4.13648	0.00229844	0.0194672	-1.75102	1	-1.08584	6.31553	-4.4249	0.00148487	0.0129244	-1.41522	1	2	LRMP	12	lymphoid-restricted membrane protein [Source:HGNC Symbol;Acc:6690]
ENSG00000118418	-0.773221	8.33817	-4.94743	0.000693577	0.0086535	-0.502224	1	-0.953682	8.33817	-6.1021	0.000148047	0.00243979	1.0114	1	2	HMGN3	6	high mobility group nucleosomal binding domain 3 [Source:HGNC Symbol;Acc:12312]
ENSG00000118495	1.24727	8.09212	9.65027	3.44236e-06	0.000322574	5.01274	1	-0.339881	8.09212	-2.62969	0.026386	0.108153	-4.36883	0	1	PLAGL1	6	pleiomorphic adenoma gene-like 1 [Source:HGNC Symbol;Acc:9046]
ENSG00000118496	1.26947	8.51023	7.15117	4.23677e-05	0.0014898	2.42159	1	0.379045	8.51023	2.13524	0.0601589	0.192519	-5.17344	0	1	FBXO30	6	F-box protein 30 [Source:HGNC Symbol;Acc:15600]
ENSG00000118503	1.06136	10.4142	5.62116	0.000275409	0.00483736	0.4644	1	1.30218	10.4142	6.89661	5.66984e-05	0.0012271	2.02372	1	2	TNFAIP3	6	tumor necrosis factor, alpha-induced protein 3 [Source:HGNC Symbol;Acc:11896]
ENSG00000118507	0.281378	5.11036	1.56502	0.150516	0.345717	-5.88578	0	1.40906	5.11036	7.83716	2.0028e-05	0.000604256	3.11857	1	1	AKAP7	6	A kinase (PRKA) anchor protein 7 [Source:HGNC Symbol;Acc:377]
ENSG00000118508	-0.330661	8.922	-1.49024	0.168863	0.373081	-5.98617	0	-1.25021	8.922	-5.63448	0.0002706	0.00377655	0.375102	1	1	RAB32	6	RAB32, member RAS oncogene family [Source:HGNC Symbol;Acc:9772]
ENSG00000118515	-1.13051	10.505	-5.22356	0.000471307	0.00672308	-0.0980781	1	-1.94051	10.505	-8.96619	6.46626e-06	0.000285504	4.30151	1	2	SGK1	6	serum/glucocorticoid regulated kinase 1 [Source:HGNC Symbol;Acc:10810]
ENSG00000118557	-1.26486	4.87655	-6.16147	0.000137422	0.0030414	1.19228	1	-1.61415	4.87655	-7.86296	1.94905e-05	0.000594056	3.14712	1	2	PMFBP1	16	polyamine modulated factor 1 binding protein 1 [Source:HGNC Symbol;Acc:17728]
ENSG00000118640	-0.824112	11.5189	-4.90212	0.000739742	0.00907523	-0.569585	1	-0.400549	11.5189	-2.38261	0.0398829	0.145499	-4.77599	0	1	VAMP8	2	vesicle-associated membrane protein 8 (endobrevin) [Source:HGNC Symbol;Acc:12647]
ENSG00000118689	1.32893	8.95405	7.40295	3.19913e-05	0.00126935	2.71414	1	0.20908	8.95405	1.1647	0.272787	0.509346	-6.51976	0	1	FOXO3	6	forkhead box O3 [Source:HGNC Symbol;Acc:3821]
ENSG00000118707	-0.895672	5.20014	-4.47204	0.0013841	0.0137528	-1.22349	1	-1.13383	5.20014	-5.66113	0.000261249	0.00367019	0.412195	1	2	TGIF2	20	TGFB-induced factor homeobox 2 [Source:HGNC Symbol;Acc:15764]
ENSG00000118849	-1.14164	8.36969	-2.15472	0.0582524	0.184252	-5.01066	0	-3.61968	8.36969	-6.83178	6.11394e-05	0.00129614	1.94424	1	1	RARRES1	3	retinoic acid receptor responder (tazarotene induced) 1 [Source:HGNC Symbol;Acc:9867]
ENSG00000118855	-0.582355	10.4807	-5.04628	0.000603223	0.0079179	-0.35627	0	-0.598761	10.4807	-5.18845	0.000494737	0.00575679	-0.260847	1	1	MFSD1	3	major facilitator superfamily domain containing 1 [Source:HGNC Symbol;Acc:25874]
ENSG00000118960	-0.613881	6.33999	-4.30097	0.00178896	0.0163259	-1.49062	1	-0.645789	6.33999	-4.52452	0.0012804	0.0116033	-1.26004	1	2	HS1BP3	2	HCLS1 binding protein 3 [Source:HGNC Symbol;Acc:24979]
ENSG00000118985	0.944059	7.68928	5.7941	0.00021952	0.00415837	0.701914	1	0.23627	7.68928	1.45009	0.179498	0.39498	-6.1731	0	1	ELL2	5	elongation factor, RNA polymerase II, 2 [Source:HGNC Symbol;Acc:17064]
ENSG00000119280	-0.256635	5.62387	-1.52527	0.160038	0.360258	-5.93951	0	-0.617809	5.62387	-3.67184	0.00475773	0.0303136	-2.62736	1	1	C1orf198	1	chromosome 1 open reading frame 198 [Source:HGNC Symbol;Acc:25900]
ENSG00000119285	-0.629255	5.9277	-4.31841	0.00174242	0.0159876	-1.4632	1	-0.300029	5.9277	-2.05902	0.0682095	0.209458	-5.29304	0	1	HEATR1	1	HEAT repeat containing 1 [Source:HGNC Symbol;Acc:25517]
ENSG00000119321	-0.933107	7.27794	-5.18271	0.000498683	0.00697246	-0.157165	1	-0.483773	7.27794	-2.687	0.0239744	0.100609	-4.27344	0	1	FKBP15	9	FK506 binding protein 15, 133kDa [Source:HGNC Symbol;Acc:23397]
ENSG00000119326	1.26759	4.65413	3.54371	0.00584247	0.0371309	-2.71456	1	1.12547	4.65413	3.1464	0.0111678	0.057544	-3.50324	0	1	CTNNAL1	9	catenin (cadherin-associated protein), alpha-like 1 [Source:HGNC Symbol;Acc:2512]
ENSG00000119397	0.549318	7.50672	3.18761	0.0104349	0.0549837	-3.30711	0	0.759515	7.50672	4.40735	0.00152436	0.0131641	-1.44269	1	1	CNTRL	9	centriolin [Source:HGNC Symbol;Acc:1858]
ENSG00000119401	-0.25729	4.47129	-1.34593	0.209821	0.426345	-6.17108	0	-1.34946	4.47129	-7.05924	4.70279e-05	0.00108583	2.22076	1	1	TRIM32	9	tripartite motif containing 32 [Source:HGNC Symbol;Acc:16380]
ENSG00000119402	0.348253	7.68962	2.55732	0.0297823	0.115316	-4.35861	0	0.784497	7.68962	5.76079	0.000229249	0.00334883	0.550022	1	1	FBXW2	9	F-box and WD repeat domain containing 2 [Source:HGNC Symbol;Acc:13608]
ENSG00000119421	0.173095	10.138	1.52404	0.160341	0.360711	-5.94116	0	0.58716	10.138	5.16972	0.000507748	0.00586868	-0.288183	1	1	NDUFA8	9	NADH dehydrogenase (ubiquinone) 1 alpha subcomplex, 8, 19kDa [Source:HGNC Symbol;Acc:7692]
ENSG00000119471	0.784139	7.10992	4.00215	0.00282821	0.0226682	-1.96611	1	1.49209	7.10992	7.61547	2.53748e-05	0.000709567	2.87	1	2	HSDL2	9	hydroxysteroid dehydrogenase like 2 [Source:HGNC Symbol;Acc:18572]
ENSG00000119508	1.29262	4.54958	4.94827	0.000692747	0.0086535	-0.500973	1	1.48647	4.54958	5.69033	0.000251402	0.00356024	0.45272	1	2	NR4A3	9	nuclear receptor subfamily 4, group A, member 3 [Source:HGNC Symbol;Acc:7982]
ENSG00000119535	-0.0955554	5.71619	-0.339316	0.741814	0.867765	-7.01767	0	-1.51838	5.71619	-5.39176	0.000374469	0.00475027	0.03258	1	1	CSF3R	1	colony stimulating factor 3 receptor (granulocyte) [Source:HGNC Symbol;Acc:2439]
ENSG00000119537	-0.154901	6.7565	-0.71971	0.489174	0.700929	-6.80362	0	-1.18327	6.7565	-5.49779	0.000324598	0.00428991	0.183238	1	1	KDSR	18	3-ketodihydrosphingosine reductase [Source:HGNC Symbol;Acc:4021]
ENSG00000119599	-0.928791	4.63259	-5.43281	0.000354245	0.0056941	0.200807	1	-0.574914	4.63259	-3.36286	0.00783135	0.0437845	-3.14058	0	1	DCAF4	14	DDB1 and CUL4 associated factor 4 [Source:HGNC Symbol;Acc:20229]
ENSG00000119640	-0.541568	6.1905	-2.87814	0.0174243	0.0790135	-3.82503	0	-1.29135	6.1905	-6.86283	5.89667e-05	0.00126444	1.98238	1	1	ACYP1	14	acylphosphatase 1, erythrocyte (common) type [Source:HGNC Symbol;Acc:179]
ENSG00000119681	1.15668	8.108	3.59395	0.0053892	0.0351896	-2.6316	1	1.71622	8.108	5.33253	0.000405875	0.00500721	-0.0522919	1	2	LTBP2	14	latent transforming growth factor beta binding protein 2 [Source:HGNC Symbol;Acc:6715]
ENSG00000119686	-0.48688	7.29701	-3.57037	0.00559719	0.0361745	-2.67051	0	1.03252	7.29701	7.57166	2.66055e-05	0.000731217	2.82022	1	1		14	Feline leukemia virus subgroup C receptor-related protein 2 [Source:UniProtKB/Swiss-Prot;Acc:Q9UPI3]
ENSG00000119711	-0.810353	7.06583	-4.77413	0.000888867	0.0101617	-0.761466	1	-0.763118	7.06583	-4.49585	0.00133597	0.0119702	-1.30456	1	2	ALDH6A1	14	aldehyde dehydrogenase 6 family, member A1 [Source:HGNC Symbol;Acc:7179]
ENSG00000119772	-0.30077	5.23499	-1.34	0.211671	0.42872	-6.17842	0	-1.09724	5.23499	-4.88846	0.000754302	0.0078298	-0.70463	1	1	DNMT3A	2	DNA (cytosine-5-)-methyltransferase 3 alpha [Source:HGNC Symbol;Acc:2978]
ENSG00000119778	0.370443	6.95453	2.12756	0.0609269	0.190319	-5.05349	0	1.11965	6.95453	6.43046	9.86215e-05	0.00182694	1.44002	1	1	ATAD2B	2	ATPase family, AAA domain containing 2B [Source:HGNC Symbol;Acc:29230]
ENSG00000119865	0.470273	7.09748	1.7455	0.113355	0.287417	-5.63219	0	-1.55829	7.09748	-5.78387	0.000222461	0.00328507	0.581733	1	1	CNRIP1	2	cannabinoid receptor interacting protein 1 [Source:HGNC Symbol;Acc:24546]
ENSG00000119906	-1.04108	6.58289	-8.87848	7.0304e-06	0.000511998	4.28188	1	-1.05352	6.58289	-8.98452	6.35473e-06	0.000284025	4.31964	1	2	FAM178A	10	family with sequence similarity 178, member A [Source:HGNC Symbol;Acc:17814]
ENSG00000119912	0.899887	7.67532	4.91075	0.000730702	0.0089831	-0.556733	1	1.17959	7.67532	6.43709	9.78298e-05	0.00182245	1.44852	1	2	IDE	10	insulin-degrading enzyme [Source:HGNC Symbol;Acc:5381]
ENSG00000119917	-2.33058	6.75951	-3.64459	0.0049694	0.0333381	-2.54819	1	-0.056562	6.75951	-0.0884521	0.931369	0.969422	-7.21242	0	1	IFIT3	10	interferon-induced protein with tetratricopeptide repeats 3 [Source:HGNC Symbol;Acc:5411]
ENSG00000119922	-2.46043	4.89798	-3.68535	0.00465634	0.0319933	-2.4812	1	-0.504255	4.89798	-0.755299	0.468533	0.689685	-6.91206	0	1	IFIT2	10	interferon-induced protein with tetratricopeptide repeats 2 [Source:HGNC Symbol;Acc:5409]
ENSG00000119927	-0.986028	4.25726	-8.13729	1.46549e-05	0.000779987	3.52434	1	-0.513577	4.25726	-4.23834	0.00196718	0.0158318	-1.70932	0	1	GPAM	10	glycerol-3-phosphate acyltransferase, mitochondrial [Source:HGNC Symbol;Acc:24865]
ENSG00000119929	-0.773031	5.79459	-6.54813	8.55451e-05	0.00225553	1.6881	1	-0.427656	5.79459	-3.62255	0.0051477	0.0320223	-2.70876	0	1	CUTC	10	cutC copper transporter homolog (E. coli) [Source:HGNC Symbol;Acc:24271]
ENSG00000119950	1.42357	6.72576	5.39384	0.000373416	0.00589551	0.145626	1	1.27411	6.72576	4.82755	0.000823053	0.00834277	-0.796306	1	2	MXI1	10	MAX interactor 1 [Source:HGNC Symbol;Acc:7534]
ENSG00000120029	-0.663688	7.28803	-3.3267	0.00830722	0.0470573	-3.07488	1	-0.197769	7.28803	-0.991306	0.346315	0.585467	-6.70261	0	1	C10orf76	10	chromosome 10 open reading frame 76 [Source:HGNC Symbol;Acc:25788]
ENSG00000120053	-1.1294	5.69037	-3.5715	0.00558707	0.0361334	-2.66865	1	-0.440652	5.69037	-1.39348	0.195477	0.417287	-6.24594	0	1	GOT1	10	glutamic-oxaloacetic transaminase 1, soluble (aspartate aminotransferase 1) [Source:HGNC Symbol;Acc:4432]
ENSG00000120057	-0.260946	3.8605	-2.26726	0.0483339	0.162036	-4.83138	0	1.95609	3.8605	16.9958	2.19503e-08	1.17182e-05	10.0026	1	1	SFRP5	10	secreted frizzled-related protein 5 [Source:HGNC Symbol;Acc:10779]
ENSG00000120129	1.83527	5.39454	8.74914	7.96313e-06	0.000548724	4.15378	1	-0.744064	5.39454	-3.54712	0.0058105	0.0350921	-2.83371	1	2	DUSP1	5	dual specificity phosphatase 1 [Source:HGNC Symbol;Acc:3064]
ENSG00000120162	0.385493	5.5554	1.47497	0.172841	0.378066	-6.0063	0	2.51564	5.5554	9.62533	3.52008e-06	0.000201342	4.93374	1	1	MOB3B	9	MOB kinase activator 3B [Source:HGNC Symbol;Acc:23825]
ENSG00000120217	1.48079	4.22414	5.91701	0.000187304	0.003755	0.868102	1	0.258951	4.22414	1.03473	0.326628	0.567029	-6.659	0	1	CD274	9	CD274 molecule [Source:HGNC Symbol;Acc:17635]
ENSG00000120253	-0.607035	4.18452	-4.18085	0.0021474	0.0186126	-1.68044	1	-0.497341	4.18452	-3.42535	0.00707457	0.0407164	-3.03627	0	1	NUP43	6	nucleoporin 43kDa [Source:HGNC Symbol;Acc:21182]
ENSG00000120256	-0.164925	4.23837	-1.2433	0.24381	0.467226	-6.29481	0	-0.880752	4.23837	-6.63962	7.66796e-05	0.00152813	1.70545	1	1	LRP11	6	low density lipoprotein receptor-related protein 11 [Source:HGNC Symbol;Acc:16936]
ENSG00000120262	0.0155304	5.4765	0.0529586	0.958871	0.980408	-7.07898	0	1.92996	5.4765	6.58116	8.22224e-05	0.00160057	1.63185	1	1	C6orf97	6	chromosome 6 open reading frame 97 [Source:HGNC Symbol;Acc:21177]
ENSG00000120265	-0.799191	9.21107	-6.93066	5.45072e-05	0.00169419	2.15884	1	-0.164155	9.21107	-1.42357	0.186839	0.405462	-6.20746	0	1	PCMT1	6	protein-L-isoaspartate (D-aspartate) O-methyltransferase [Source:HGNC Symbol;Acc:8728]
ENSG00000120280	-1.1104	8.49239	-7.91872	1.83817e-05	0.000882371	3.28967	1	0.26773	8.49239	1.9093	0.0871083	0.247554	-5.523	0	1	CXorf21	X	chromosome X open reading frame 21 [Source:HGNC Symbol;Acc:25667]
ENSG00000120306	0.398067	10.0811	2.56188	0.0295558	0.114719	-4.35108	0	0.874156	10.0811	5.6259	0.000273686	0.00379642	0.363142	1	1	C5orf32	5	chromosome 5 open reading frame 32 [Source:HGNC Symbol;Acc:30239]
ENSG00000120457	-0.229525	3.70825	-1.45238	0.178876	0.38661	-6.03584	0	-1.1189	3.70825	-7.08014	4.59216e-05	0.00106588	2.24584	1	1	KCNJ5	11	potassium inwardly-rectifying channel, subfamily J, member 5 [Source:HGNC Symbol;Acc:6266]
ENSG00000120526	-1.09279	5.29064	-6.93034	5.45272e-05	0.00169419	2.15846	1	-0.206531	5.29064	-1.30979	0.221307	0.44872	-6.35006	0	1	NUDCD1	8	NudC domain containing 1 [Source:HGNC Symbol;Acc:24306]
ENSG00000120594	-1.44961	7.73239	-6.55253	8.50945e-05	0.00225092	1.69362	1	-0.0197142	7.73239	-0.0891121	0.930859	0.969302	-7.21236	0	1	PLXDC2	10	plexin domain containing 2 [Source:HGNC Symbol;Acc:21013]
ENSG00000120694	1.14432	9.76649	4.4618	0.00140536	0.0138857	-1.23937	1	0.604891	9.76649	2.35852	0.0415184	0.149028	-4.81522	0	1	HSPH1	13	heat shock 105kDa/110kDa protein 1 [Source:HGNC Symbol;Acc:16969]
ENSG00000120696	-1.12626	5.88655	-5.71653	0.000242905	0.00447622	0.59591	1	-1.01649	5.88655	-5.15936	0.0005151	0.00592718	-0.30332	1	2	KBTBD7	13	kelch repeat and BTB (POZ) domain containing 7 [Source:HGNC Symbol;Acc:25266]
ENSG00000120708	-0.617643	12.7376	-3.92857	0.00317182	0.0245788	-2.08482	1	0.338226	12.7376	2.15131	0.0585816	0.18919	-5.14802	0	1	TGFBI	5	transforming growth factor, beta-induced, 68kDa [Source:HGNC Symbol;Acc:11771]
ENSG00000120738	1.9403	6.64533	5.34951	0.000396592	0.00613412	0.0825856	1	-0.176505	6.64533	-0.486633	0.637641	0.811422	-7.08806	0	1	EGR1	5	early growth response 1 [Source:HGNC Symbol;Acc:3238]
ENSG00000120798	0.447835	6.30737	3.64797	0.00494257	0.0331884	-2.54262	0	0.73524	6.30737	5.98912	0.000170812	0.00270648	0.86047	1	1	NR2C1	12	nuclear receptor subfamily 2, group C, member 1 [Source:HGNC Symbol;Acc:7971]
ENSG00000120800	-1.39865	4.64025	-6.00842	0.000166669	0.00347872	0.990307	1	-0.501425	4.64025	-2.15405	0.0583169	0.188681	-5.14369	0	1	UTP20	12	UTP20, small subunit (SSU) processome component, homolog (yeast) [Source:HGNC Symbol;Acc:17897]
ENSG00000120802	0.0940431	3.89495	0.709361	0.495282	0.705216	-6.81132	0	0.632328	3.89495	4.76961	0.000894691	0.00884996	-0.88398	1	1	TMPO	12	thymopoietin [Source:HGNC Symbol;Acc:11875]
ENSG00000120832	-0.877743	4.61774	-7.32277	3.49583e-05	0.00134063	2.62182	1	-0.937177	4.61774	-7.81861	2.04245e-05	0.000611936	3.09798	1	2	MTERFD3	12	MTERF domain containing 3 [Source:HGNC Symbol;Acc:30779]
ENSG00000120833	1.12309	4.61822	4.81962	0.000832482	0.00971247	-0.693008	1	3.99635	4.61822	17.1499	2.021e-08	1.16569e-05	10.0805	1	2	SOCS2	12	suppressor of cytokine signaling 2 [Source:HGNC Symbol;Acc:19382]
ENSG00000120875	4.64906	7.19748	7.87617	1.92214e-05	0.000911603	3.24336	1	3.39587	7.19748	5.75308	0.000231569	0.00337068	0.539402	1	2	DUSP4	8	dual specificity phosphatase 4 [Source:HGNC Symbol;Acc:3070]
ENSG00000120885	1.15637	3.85499	3.97069	0.00297005	0.0234109	-2.01679	1	1.28852	3.85499	4.42448	0.00148581	0.0129262	-1.41588	1	2	CLU	8	clusterin [Source:HGNC Symbol;Acc:2095]
ENSG00000120896	-0.0367169	3.84049	-0.340845	0.740699	0.867209	-7.01711	0	-0.750846	3.84049	-6.97015	5.20809e-05	0.00116583	2.11324	1	1	SORBS3	8	sorbin and SH3 domain containing 3 [Source:HGNC Symbol;Acc:30907]
ENSG00000120910	1.14385	8.28105	5.95922	0.00017745	0.00363928	0.924683	1	1.35038	8.28105	7.03522	4.83356e-05	0.00110445	2.19187	1	2	PPP3CC	8	protein phosphatase 3, catalytic subunit, gamma isozyme [Source:HGNC Symbol;Acc:9316]
ENSG00000120942	-0.672363	5.7673	-4.83252	0.000817193	0.0096273	-0.673642	1	-0.256162	5.7673	-1.84113	0.0972579	0.266646	-5.62521	0	1	UBIAD1	1	UbiA prenyltransferase domain containing 1 [Source:HGNC Symbol;Acc:30791]
ENSG00000120963	-0.406715	6.3691	-1.70213	0.121432	0.300417	-5.69448	0	0.80966	6.3691	3.38849	0.00751128	0.0424123	-3.09777	1	1	ZNF706	8	zinc finger protein 706 [Source:HGNC Symbol;Acc:24992]
ENSG00000121057	-1.2391	6.49914	-6.13677	0.000141738	0.00310186	1.15992	1	-0.720604	6.49914	-3.56888	0.00561063	0.0341402	-2.79762	1	2	AKAP1	17	A kinase (PRKA) anchor protein 1 [Source:HGNC Symbol;Acc:367]
ENSG00000121083	0.587049	6.80589	3.94699	0.00308185	0.024066	-2.05504	1	0.416003	6.80589	2.79697	0.0199499	0.0878645	-4.0897	0	1	DYNLL2	17	dynein, light chain, LC8-type 2 [Source:HGNC Symbol;Acc:24596]
ENSG00000121281	-1.37188	5.89257	-13.6342	1.62433e-07	5.97166e-05	8.04648	1	-0.62912	5.89257	-6.25236	0.00012272	0.00212389	1.20936	1	2	ADCY7	16	adenylate cyclase 7 [Source:HGNC Symbol;Acc:238]
ENSG00000121297	0.673092	6.75451	3.82578	0.00372715	0.027571	-2.25162	1	1.66836	6.75451	9.48274	4.00306e-06	0.000213057	4.80035	1	2	TSHZ3	19	teashirt zinc finger homeobox 3 [Source:HGNC Symbol;Acc:30700]
ENSG00000121316	-0.407517	8.74067	-1.94621	0.0820357	0.231792	-5.33422	0	-1.47968	8.74067	-7.06665	4.66326e-05	0.00107812	2.22965	1	1	PLBD1	12	phospholipase B domain containing 1 [Source:HGNC Symbol;Acc:26215]
ENSG00000121552	1.23028	10.7039	7.07993	4.59324e-05	0.00154584	2.33738	1	0.950282	10.7039	5.46862	0.00033756	0.00439412	0.141958	1	2	CSTA	3	cystatin A (stefin A) [Source:HGNC Symbol;Acc:2481]
ENSG00000121577	0.237061	4.74585	1.40883	0.191029	0.40315	-6.09199	0	0.811279	4.74585	4.82133	0.00083044	0.0083935	-0.805695	1	1	POPDC2	3	popeye domain containing 2 [Source:HGNC Symbol;Acc:17648]
ENSG00000121594	1.18921	4.84344	4.40712	0.00152489	0.0146718	-1.3244	1	1.65221	4.84344	6.12296	0.000144215	0.00239683	1.03906	1	2	CD80	3	CD80 molecule [Source:HGNC Symbol;Acc:1700]
ENSG00000121691	-1.18444	7.87035	-6.19851	0.000131212	0.00294467	1.24067	1	-0.854448	7.87035	-4.47155	0.00138509	0.0123052	-1.34238	1	2	CAT	11	catalase [Source:HGNC Symbol;Acc:1516]
ENSG00000121743	0.930052	3.99145	2.11585	0.0621154	0.192858	-5.07189	0	1.57395	3.99145	3.58072	0.00550491	0.0336269	-2.778	1	1	GJA3	13	gap junction protein, alpha 3, 46kDa [Source:HGNC Symbol;Acc:4277]
ENSG00000121769	-0.776723	6.65848	-2.32632	0.0438086	0.15121	-4.73624	0	-3.17935	6.65848	-9.52227	3.86226e-06	0.000210004	4.83752	1	1	FABP3	1	fatty acid binding protein 3, muscle and heart (mammary-derived growth inhibitor) [Source:HGNC Symbol;Acc:3557]
ENSG00000121851	-0.794115	8.58814	-5.32827	0.000408243	0.0062475	0.0522765	1	-0.161623	8.58814	-1.08444	0.305144	0.544804	-6.60725	0	1	POLR3GL	1	polymerase (RNA) III (DNA directed) polypeptide G (32kD)-like [Source:HGNC Symbol;Acc:28466]
ENSG00000121858	-2.55604	7.12983	-5.38402	0.000378422	0.00593647	0.131685	1	-1.12452	7.12983	-2.36868	0.0408209	0.147365	-4.79869	0	1	TNFSF10	3	tumor necrosis factor (ligand) superfamily, member 10 [Source:HGNC Symbol;Acc:11925]
ENSG00000121897	-1.05494	5.88993	-5.8838	0.000195472	0.00385193	0.82341	1	-0.389233	5.88993	-2.1709	0.0567143	0.185265	-5.11698	0	1	LIAS	4	lipoic acid synthetase [Source:HGNC Symbol;Acc:16429]
ENSG00000121905	0.612859	3.53284	5.4688	0.000337481	0.00555091	0.251566	1	0.306657	3.53284	2.73643	0.022073	0.0946733	-4.19095	0	1	HPCA	1	hippocalcin [Source:HGNC Symbol;Acc:5144]
ENSG00000121933	-1.29558	7.76562	-4.70044	0.00098907	0.0109381	-0.873005	1	-1.18916	7.76562	-4.31434	0.00175318	0.0145303	-1.58898	1	2	ADORA3	1	adenosine A3 receptor [Source:HGNC Symbol;Acc:268]
ENSG00000121964	0.686388	6.42952	4.40259	0.00153526	0.0147127	-1.33146	1	1.50719	6.42952	9.66732	3.39031e-06	0.000199756	4.97268	1	2	GTDC1	2	glycosyltransferase-like domain containing 1 [Source:HGNC Symbol;Acc:20887]
ENSG00000121966	-0.696536	10.51	-2.66328	0.0249444	0.10163	-4.18321	0	-1.38438	10.51	-5.29331	0.000428225	0.0051992	-0.108772	1	1	CXCR4	2	chemokine (C-X-C motif) receptor 4 [Source:HGNC Symbol;Acc:2561]
ENSG00000121988	-0.596019	3.51095	-3.54746	0.00580735	0.0369833	-2.70837	1	-0.0372945	3.51095	-0.221974	0.829072	0.920093	-7.18969	0	1	ZRANB3	2	zinc finger, RAN-binding domain containing 3 [Source:HGNC Symbol;Acc:25249]
ENSG00000122025	1.87097	5.28836	4.80775	0.000846817	0.00980826	-0.710844	1	5.46878	5.28836	14.0529	1.23655e-07	2.82513e-05	8.33193	1	2	FLT3	13	fms-related tyrosine kinase 3 [Source:HGNC Symbol;Acc:3765]
ENSG00000122034	-0.724106	9.36937	-6.02139	0.000163945	0.00344657	1.00756	1	-0.520937	9.36937	-4.33191	0.0017073	0.0142843	-1.56126	0	1	GTF3A	13	general transcription factor IIIA [Source:HGNC Symbol;Acc:4662]
ENSG00000122035	1.34692	4.23283	3.45541	0.006738	0.0408336	-2.86081	1	1.36839	4.23283	3.51051	0.0061637	0.0368088	-2.89451	1	2	RASL11A	13	RAS-like, family 11, member A [Source:HGNC Symbol;Acc:23802]
ENSG00000122203	0.591622	9.58125	5.67205	0.000257517	0.004653	0.534741	1	-0.270395	9.58125	-2.59235	0.0280869	0.112996	-4.43082	0	1	KIAA1191	5	KIAA1191 [Source:HGNC Symbol;Acc:29209]
ENSG00000122223	-0.20109	3.73524	-1.29286	0.226868	0.447763	-6.23592	0	-0.822167	3.73524	-5.28592	0.000432582	0.00522688	-0.119437	1	1	CD244	1	CD244 molecule, natural killer cell receptor 2B4 [Source:HGNC Symbol;Acc:18171]
ENSG00000122224	-0.156382	3.98425	-0.524465	0.612073	0.787762	-6.93162	0	-1.43386	3.98425	-4.80876	0.00084558	0.00848325	-0.824677	1	1	LY9	1	lymphocyte antigen 9 [Source:HGNC Symbol;Acc:6730]
ENSG00000122254	-0.822894	6.08754	-1.83396	0.0983871	0.262205	-5.50273	0	-3.48967	6.08754	-7.77732	2.13382e-05	0.000631045	3.05203	1	1	HS3ST2	16	heparan sulfate (glucosamine) 3-O-sulfotransferase 2 [Source:HGNC Symbol;Acc:5195]
ENSG00000122335	-0.93958	5.16074	-4.05385	0.00261049	0.0213986	-1.88308	1	-0.72166	5.16074	-3.11362	0.0117885	0.0598314	-3.55827	0	1	SERAC1	6	serine active site containing 1 [Source:HGNC Symbol;Acc:21061]
ENSG00000122378	-0.120264	7.13682	-0.38836	0.706382	0.84673	-6.99834	0	-1.51446	7.13682	-4.89054	0.000752067	0.0078157	-0.701511	1	1	C10orf58	10	chromosome 10 open reading frame 58 [Source:HGNC Symbol;Acc:28651]
ENSG00000122406	-0.535442	11.982	-4.9868	0.000655963	0.00838005	-0.443926	0	-1.39788	11.982	-13.0191	2.45945e-07	3.89222e-05	7.64887	1	1	RPL5	1	ribosomal protein L5 [Source:HGNC Symbol;Acc:10360]
ENSG00000122435	-1.1754	5.51289	-6.59754	8.06265e-05	0.00216524	1.74999	1	-0.544859	5.51289	-3.0583	0.0129177	0.0638171	-3.65119	0	1	CCDC76	1	coiled-coil domain containing 76 [Source:HGNC Symbol;Acc:25502]
ENSG00000122547	-2.48232	6.73777	-19.3922	6.53935e-09	1.04731e-05	10.9835	1	-1.68912	6.73777	-13.1956	2.17943e-07	3.72767e-05	7.7696	1	2	EEPD1	7	endonuclease/exonuclease/phosphatase family domain containing 1 [Source:HGNC Symbol;Acc:22223]
ENSG00000122574	0.539601	5.08445	2.78435	0.0203749	0.0882695	-3.98168	0	1.24703	5.08445	6.43471	9.8113e-05	0.00182273	1.44547	1	1	WIPF3	7	WAS/WASL interacting protein family, member 3 [Source:HGNC Symbol;Acc:22004]
ENSG00000122591	0.698427	5.17078	6.59316	8.10493e-05	0.00217328	1.74453	1	0.045161	5.17078	0.42632	0.679451	0.83577	-7.11769	0	1	FAM126A	7	family with sequence similarity 126, member A [Source:HGNC Symbol;Acc:24587]
ENSG00000122687	-1.06681	7.64779	-5.7766	0.000224577	0.00423594	0.678066	1	-1.0988	7.64779	-5.94984	0.00017959	0.00279986	0.807593	1	2	FTSJ2	7	FtsJ homolog 2 (E. coli) [Source:HGNC Symbol;Acc:16352]
ENSG00000122691	1.03157	3.67668	4.67796	0.00102199	0.0111531	-0.907181	1	0.823104	3.67668	3.73262	0.00431905	0.0282413	-2.52729	1	2	TWIST1	7	twist homolog 1 (Drosophila) [Source:HGNC Symbol;Acc:12428]
ENSG00000122694	0.498246	9.23093	3.38043	0.00761048	0.0442926	-2.98541	0	1.54397	9.23093	10.4753	1.68806e-06	0.000131007	5.6929	1	1	GLIPR2	9	GLI pathogenesis-related 2 [Source:HGNC Symbol;Acc:18007]
ENSG00000122707	0.00174533	3.90381	0.0120002	0.990676	0.99582	-7.08044	0	0.704553	3.90381	4.84422	0.000803586	0.00821881	-0.771153	1	1	RECK	9	reversion-inducing-cysteine-rich protein with kazal motifs [Source:HGNC Symbol;Acc:11345]
ENSG00000122729	0.552431	7.56463	2.70144	0.0234022	0.097052	-4.11979	0	1.56515	7.56463	7.65374	2.43501e-05	0.000687461	2.91332	1	1	ACO1	9	aconitase 1, soluble [Source:HGNC Symbol;Acc:117]
ENSG00000122779	0.532464	7.66204	3.71049	0.00447366	0.0311758	-2.43997	0	1.13214	7.66204	7.88932	1.89574e-05	0.000580823	3.17623	1	1	TRIM24	7	tripartite motif containing 24 [Source:HGNC Symbol;Acc:11812]
ENSG00000122862	0.355414	12.3967	3.15897	0.0109388	0.05688	-3.35501	0	0.827356	12.3967	7.35364	3.3782e-05	0.000857858	2.56905	1	1	SRGN	10	serglycin [Source:HGNC Symbol;Acc:9361]
ENSG00000122884	1.38787	8.07029	5.12157	0.000542905	0.0073572	-0.246064	1	1.2804	8.07029	4.72497	0.000954434	0.00931026	-0.951859	1	2	P4HA1	10	prolyl 4-hydroxylase, alpha polypeptide I [Source:HGNC Symbol;Acc:8546]
ENSG00000122971	-0.0422481	5.03058	-0.32887	0.749448	0.871976	-7.02146	0	-0.703725	5.03058	-5.47797	0.000333345	0.00435326	0.155205	1	1	ACADS	12	acyl-CoA dehydrogenase, C-2 to C-3 short chain [Source:HGNC Symbol;Acc:90]
ENSG00000122986	-1.7147	6.92158	-13.3113	2.01506e-07	6.73744e-05	7.83856	1	-0.62561	6.92158	-4.85664	0.000789411	0.00810435	-0.75245	1	2	HVCN1	12	hydrogen voltage-gated channel 1 [Source:HGNC Symbol;Acc:28240]
ENSG00000123066	-0.315198	7.90255	-2.99887	0.014255	0.0687277	-3.623	0	-0.675773	7.90255	-6.42946	9.87413e-05	0.00182723	1.43874	1	1	MED13L	12	mediator complex subunit 13-like [Source:HGNC Symbol;Acc:22962]
ENSG00000123094	0.634634	3.35625	5.16614	0.000510277	0.00705062	-0.181214	1	0.180035	3.35625	1.46554	0.175339	0.389379	-6.15291	0	1	RASSF8	12	Ras association (RalGDS/AF-6) domain family (N-terminal) member 8 [Source:HGNC Symbol;Acc:13232]
ENSG00000123095	-0.00399083	4.43941	-0.0178568	0.986126	0.993627	-7.08035	0	0.989214	4.43941	4.4262	0.00148199	0.0129178	-1.41319	1	1	BHLHE41	12	basic helix-loop-helix family, member e41 [Source:HGNC Symbol;Acc:16617]
ENSG00000123096	0.124598	3.68393	0.762395	0.464486	0.681918	-6.7708	0	1.145	3.68393	7.00607	4.99761e-05	0.0011302	2.15671	1	1	SSPN	12	sarcospan (Kras oncogene-associated gene) [Source:HGNC Symbol;Acc:11322]
ENSG00000123124	-1.6252	7.06007	-10.3552	1.86692e-06	0.000225041	5.63369	1	-1.82321	7.06007	-11.6169	6.79229e-07	7.62164e-05	6.62423	1	2	WWP1	8	WW domain containing E3 ubiquitin protein ligase 1 [Source:HGNC Symbol;Acc:17004]
ENSG00000123131	0.164811	8.81381	0.932403	0.374409	0.601437	-6.62393	0	-0.69369	8.81381	-3.92448	0.00319215	0.0226667	-2.21369	1	1	PRDX4	X	peroxiredoxin 4 [Source:HGNC Symbol;Acc:17169]
ENSG00000123136	-0.629889	6.79974	-6.39905	0.000102468	0.0025072	1.49936	1	-0.138847	6.79974	-1.41055	0.190534	0.410129	-6.22417	0	1	DDX39A	19	DEAD (Asp-Glu-Ala-Asp) box polypeptide 39A [Source:HGNC Symbol;Acc:17821]
ENSG00000123146	-0.321468	7.87812	-1.29314	0.226775	0.447629	-6.23558	0	-1.49982	7.87812	-6.03321	0.000161506	0.00260078	0.919581	1	1	CD97	19	CD97 molecule [Source:HGNC Symbol;Acc:1711]
ENSG00000123179	-0.214531	4.60804	-0.826163	0.429139	0.65366	-6.71869	0	-1.23068	4.60804	-4.73938	0.000934694	0.00915314	-0.929914	1	1	EBPL	13	emopamil binding protein-like [Source:HGNC Symbol;Acc:18061]
ENSG00000123201	-0.108136	3.15136	-0.551907	0.593862	0.776444	-6.91589	0	0.689889	3.15136	3.52105	0.00605972	0.0362887	-2.87698	1	1	GUCY1B2	13	guanylate cyclase 1, soluble, beta 2 [Source:HGNC Symbol;Acc:4686]
ENSG00000123213	-1.76131	6.57239	-5.31363	0.000416485	0.00629263	0.0313533	1	-1.55544	6.57239	-4.69255	0.0010005	0.00963154	-1.00133	1	2	NLN	5	neurolysin (metallopeptidase M3 family) [Source:HGNC Symbol;Acc:16058]
ENSG00000123297	0.931946	7.30077	6.16587	0.000136666	0.00303324	1.19805	1	1.77962	7.30077	11.7742	6.0289e-07	7.12827e-05	6.74534	1	2	TSFM	12	Ts translation elongation factor, mitochondrial [Source:HGNC Symbol;Acc:12367]
ENSG00000123338	-0.648102	9.07341	-3.45946	0.00669402	0.0406911	-2.8541	1	-0.14829	9.07341	-0.791546	0.448097	0.673581	-6.88307	0	1	NCKAP1L	12	NCK-associated protein 1-like [Source:HGNC Symbol;Acc:4862]
ENSG00000123342	1.19896	8.33825	4.9874	0.000655403	0.00837898	-0.443033	1	1.98708	8.33825	8.26582	1.28549e-05	0.000453043	3.58353	1	2	MMP19	12	matrix metallopeptidase 19 [Source:HGNC Symbol;Acc:7165]
ENSG00000123358	1.28422	5.10347	6.28661	0.000117631	0.00274115	1.355	1	0.304501	5.10347	1.49062	0.168766	0.379616	-6.11985	0	1	NR4A1	12	nuclear receptor subfamily 4, group A, member 1 [Source:HGNC Symbol;Acc:7980]
ENSG00000123416	-0.974092	10.9276	-3.86471	0.00350563	0.0263251	-2.18831	1	-0.39677	10.9276	-1.57418	0.148394	0.350371	-6.00722	0	1	TUBA1B	12	tubulin, alpha 1b [Source:HGNC Symbol;Acc:18809]
ENSG00000123595	-1.30401	9.6796	-10.8556	1.23508e-06	0.000172741	6.0498	1	-1.14534	9.6796	-9.53473	3.81903e-06	0.000208944	4.8492	1	2	RAB9A	X	RAB9A, member RAS oncogene family [Source:HGNC Symbol;Acc:9792]
ENSG00000123610	2.84468	10.1355	10.2749	1.99815e-06	0.000232734	5.56502	1	5.52267	10.1355	19.9477	5.04074e-09	4.20813e-06	11.3588	1	2	TNFAIP6	2	tumor necrosis factor, alpha-induced protein 6 [Source:HGNC Symbol;Acc:11898]
ENSG00000123643	-0.752109	5.1565	-5.29516	0.000427137	0.0063805	0.00491638	1	-0.135263	5.1565	-0.952311	0.364734	0.603733	-6.74049	0	1	SLC36A1	5	solute carrier family 36 (proton/amino acid symporter), member 1 [Source:HGNC Symbol;Acc:18761]
ENSG00000123689	4.329	7.01242	7.13472	4.31634e-05	0.00149796	2.40219	1	2.98092	7.01242	4.91292	0.00072845	0.00762607	-0.667968	1	2	G0S2	1	G0/G1switch 2 [Source:HGNC Symbol;Acc:30229]
ENSG00000123700	0.338022	4.90787	1.24462	0.243346	0.466691	-6.29326	0	1.11239	4.90787	4.09591	0.00244639	0.0186249	-1.93677	1	1	KCNJ2	17	potassium inwardly-rectifying channel, subfamily J, member 2 [Source:HGNC Symbol;Acc:6263]
ENSG00000123728	0.624468	9.41644	5.0492	0.000600756	0.00790405	-0.351985	1	0.671784	9.41644	5.43178	0.000354737	0.00456161	0.0896369	1	2	RAP2C	X	RAP2C, member of RAS oncogene family [Source:HGNC Symbol;Acc:21165]
ENSG00000123836	-0.332512	3.79778	-2.38672	0.0396105	0.141116	-4.63828	0	-0.602607	3.79778	-4.32542	0.0017241	0.0143814	-1.5715	1	1	PFKFB2	1	6-phosphofructo-2-kinase/fructose-2,6-biphosphatase 2 [Source:HGNC Symbol;Acc:8873]
ENSG00000123892	1.29395	4.71946	5.33765	0.000403052	0.00619596	0.0656712	1	0.137647	4.71946	0.567807	0.583444	0.773987	-7.04234	0	1	RAB38	11	RAB38, member RAS oncogene family [Source:HGNC Symbol;Acc:9776]
ENSG00000123992	-0.440338	6.26634	-2.64029	0.0259222	0.104501	-4.22134	0	-1.56595	6.26634	-9.38952	4.35787e-06	0.000226468	4.71216	1	1	DNPEP	2	aspartyl aminopeptidase [Source:HGNC Symbol;Acc:2981]
ENSG00000124098	-0.382143	9.01207	-2.70033	0.0234459	0.0971765	-4.12164	0	1.36653	9.01207	9.65628	3.42393e-06	0.000200397	4.96246	1	1	C20orf108	20	chromosome 20 open reading frame 108 [Source:HGNC Symbol;Acc:16102]
ENSG00000124102	0.804269	3.94797	3.46751	0.00660735	0.0403332	-2.84075	1	0.285506	3.94797	1.23092	0.248199	0.480656	-6.44408	0	1	PI3	20	peptidase inhibitor 3, skin-derived [Source:HGNC Symbol;Acc:8947]
ENSG00000124145	1.3343	7.71389	6.54124	8.62568e-05	0.00226466	1.67944	1	1.3719	7.71389	6.72556	6.92551e-05	0.00141704	1.81284	1	2	SDC4	20	syndecan 4 [Source:HGNC Symbol;Acc:10661]
ENSG00000124201	0.452275	8.63181	2.5673	0.0292894	0.114165	-4.34215	0	0.833565	8.63181	4.73165	0.000945227	0.00924088	-0.941681	1	1	ZNFX1	20	zinc finger, NFX1-type containing 1 [Source:HGNC Symbol;Acc:29271]
ENSG00000124216	1.72286	4.06272	8.05901	1.58851e-05	0.000819866	3.44091	1	0.735581	4.06272	3.44083	0.0068992	0.0400077	-3.01048	1	2	SNAI1	20	snail homolog 1 (Drosophila) [Source:HGNC Symbol;Acc:11128]
ENSG00000124225	0.922523	6.13723	2.91052	0.0165097	0.0762389	-3.77087	0	1.11211	6.13723	3.50865	0.00618222	0.0368616	-2.89759	1	1	PMEPA1	20	prostate transmembrane protein, androgen induced 1 [Source:HGNC Symbol;Acc:14107]
ENSG00000124228	-0.714932	8.1626	-5.99745	0.000169009	0.00350699	0.97571	1	-0.685522	8.1626	-5.75074	0.000232276	0.00337068	0.536185	1	2	DDX27	20	DEAD (Asp-Glu-Ala-Asp) box polypeptide 27 [Source:HGNC Symbol;Acc:15837]
ENSG00000124243	0.0289713	5.18735	0.157002	0.878557	0.942159	-7.067	0	0.906818	5.18735	4.91425	0.000727066	0.00762424	-0.665968	1	1	BCAS4	20	breast carcinoma amplified sequence 4 [Source:HGNC Symbol;Acc:14367]
ENSG00000124257	-1.53327	3.88244	-3.88768	0.00338147	0.0255891	-2.15103	1	-0.304191	3.88244	-0.771291	0.459444	0.682464	-6.89941	0	1	NEURL2	20	neuralized homolog 2 (Drosophila) [Source:HGNC Symbol;Acc:16156]
ENSG00000124357	-1.42785	9.81647	-9.15656	5.40486e-06	0.000443914	4.55171	1	-1.09544	9.81647	-7.02483	4.89133e-05	0.00111476	2.17935	1	2	NAGK	2	N-acetylglucosamine kinase [Source:HGNC Symbol;Acc:17174]
ENSG00000124370	-1.1085	5.43786	-4.86717	0.000777601	0.00935085	-0.621749	1	-0.349735	5.43786	-1.5356	0.157513	0.364112	-6.05967	0	1	MCEE	2	methylmalonyl CoA epimerase [Source:HGNC Symbol;Acc:16732]
ENSG00000124374	0.563202	3.85433	4.13084	0.00231843	0.0195893	-1.76	0	0.761147	3.85433	5.58268	0.000289827	0.00394322	0.302712	1	1	PAIP2B	2	poly(A) binding protein interacting protein 2B [Source:HGNC Symbol;Acc:29200]
ENSG00000124383	-0.738602	8.43946	-4.88219	0.000761087	0.0092416	-0.599315	1	-0.211267	8.43946	-1.39648	0.194599	0.416404	-6.24212	0	1	MPHOSPH10	2	M-phase phosphoprotein 10 (U3 small nucleolar ribonucleoprotein) [Source:HGNC Symbol;Acc:7213]
ENSG00000124406	-0.612034	3.6059	-4.11263	0.00238422	0.0200109	-1.78904	1	-0.794999	3.6059	-5.34209	0.000400621	0.00498047	-0.0385632	1	2	ATP8A1	4	ATPase, aminophospholipid transporter (APLT), class I, type 8A, member 1 [Source:HGNC Symbol;Acc:13531]
ENSG00000124479	3.87514	5.59591	9.49358	3.9639e-06	0.000352687	4.86885	1	3.70466	5.59591	9.07591	5.8292e-06	0.000268128	4.40957	1	2	NDP	X	Norrie disease (pseudoglioma) [Source:HGNC Symbol;Acc:7678]
ENSG00000124491	-0.814813	10.2705	-1.67717	0.126317	0.308045	-5.72996	0	-1.87322	10.2705	-3.85574	0.00355545	0.0244864	-2.32562	1	1	F13A1	6	coagulation factor XIII, A1 polypeptide [Source:HGNC Symbol;Acc:3531]
ENSG00000124496	-1.44867	5.63642	-5.75204	0.000231882	0.0043458	0.644547	1	-0.389955	5.63642	-1.54834	0.154449	0.359199	-6.04244	0	1	TRERF1	6	transcriptional regulating factor 1 [Source:HGNC Symbol;Acc:18273]
ENSG00000124532	-0.639837	5.61077	-5.87782	0.000196983	0.00387146	0.815344	1	-0.816274	5.61077	-7.49865	2.88042e-05	0.000774724	2.73673	1	2	MRS2	6	MRS2 magnesium homeostasis factor homolog (S. cerevisiae) [Source:HGNC Symbol;Acc:13785]
ENSG00000124571	0.542786	5.3939	3.49198	0.00635098	0.0392993	-2.80018	0	1.05962	5.3939	6.817	6.22038e-05	0.00131554	1.92605	1	1	XPO5	6	exportin 5 [Source:HGNC Symbol;Acc:17675]
ENSG00000124574	-0.834058	6.64714	-5.74904	0.000232794	0.00435587	0.640436	1	0.0653846	6.64714	0.450686	0.662411	0.826699	-7.10617	0	1	ABCC10	6	ATP-binding cassette, sub-family C (CFTR/MRP), member 10 [Source:HGNC Symbol;Acc:52]
ENSG00000124588	-0.245311	9.72196	-1.95115	0.081379	0.230495	-5.32671	0	-1.01398	9.72196	-8.06496	1.57878e-05	0.000517626	3.36817	1	1	NQO2	6	NAD(P)H dehydrogenase, quinone 2 [Source:HGNC Symbol;Acc:7856]
ENSG00000124659	-0.666521	7.2729	-4.63919	0.00108153	0.0116029	-0.96628	1	-0.107941	7.2729	-0.751303	0.470822	0.691972	-6.91518	0	1	TBCC	6	tubulin folding cofactor C [Source:HGNC Symbol;Acc:11580]
ENSG00000124713	0.120538	4.04823	0.644635	0.534546	0.735595	-6.85721	0	0.865212	4.04823	4.62713	0.0011008	0.0103232	-1.10159	1	1	GNMT	6	glycine N-methyltransferase [Source:HGNC Symbol;Acc:4415]
ENSG00000124731	3.12486	7.25299	12.6092	3.27515e-07	8.74217e-05	7.36604	1	4.79717	7.25299	19.3571	6.6492e-09	5.093e-06	11.1088	1	2	TREM1	6	triggering receptor expressed on myeloid cells 1 [Source:HGNC Symbol;Acc:17760]
ENSG00000124762	1.03659	10.1231	4.43381	0.00146525	0.0143134	-1.28285	1	0.95165	10.1231	4.0705	0.00254419	0.0191297	-1.97761	1	2	CDKN1A	6	cyclin-dependent kinase inhibitor 1A (p21, Cip1) [Source:HGNC Symbol;Acc:1784]
ENSG00000124783	-0.612681	8.05974	-5.89575	0.000192488	0.00382306	0.839516	1	-0.63371	8.05974	-6.09812	0.000148791	0.00244748	1.0061	1	2	SSR1	6	signal sequence receptor, alpha [Source:HGNC Symbol;Acc:11323]
ENSG00000124784	-1.14461	5.5042	-4.88824	0.000754536	0.00919907	-0.590281	1	-0.755257	5.5042	-3.22544	0.00980571	0.0520449	-3.37063	0	1	RIOK1	6	RIO kinase 1 (yeast) [Source:HGNC Symbol;Acc:18656]
ENSG00000124802	-1.02315	7.35388	-6.60253	8.01474e-05	0.00215895	1.75622	1	-0.473925	7.35388	-3.05831	0.0129174	0.0638171	-3.65117	0	1	EEF1E1	6	eukaryotic translation elongation factor 1 epsilon 1 [Source:HGNC Symbol;Acc:3212]
ENSG00000124831	-0.350785	6.75762	-2.87746	0.017444	0.0790613	-3.82616	0	-0.689851	6.75762	-5.65878	0.000262059	0.00367864	0.40893	1	1	LRRFIP1	2	leucine rich repeat (in FLII) interacting protein 1 [Source:HGNC Symbol;Acc:6702]
ENSG00000124875	5.38871	7.73964	11.6209	6.77174e-07	0.000122987	6.6499	1	6.86038	7.73964	14.7946	7.76465e-08	2.35844e-05	8.78865	1	2	CXCL6	4	chemokine (C-X-C motif) ligand 6 (granulocyte chemotactic protein 2) [Source:HGNC Symbol;Acc:10643]
ENSG00000124882	4.35226	8.08869	12.857	2.75157e-07	7.94664e-05	7.53612	1	4.05516	8.08869	11.9794	5.17133e-07	6.37086e-05	6.90089	1	2	EREG	4	epiregulin [Source:HGNC Symbol;Acc:3443]
ENSG00000124942	-0.522761	8.67426	-5.97973	0.000172866	0.00356602	0.952085	0	-0.837095	8.67426	-9.57531	3.68181e-06	0.000204614	4.88716	1	1	AHNAK	11	AHNAK nucleoprotein [Source:HGNC Symbol;Acc:347]
ENSG00000125037	0.695284	10.2114	7.5362	2.76495e-05	0.00115701	2.86584	1	-0.00770549	10.2114	-0.08352	0.935186	0.970841	-7.21289	0	1	TMEM111	3	transmembrane protein 111 [Source:HGNC Symbol;Acc:23999]
ENSG00000125144	5.96973	11.7614	6.17398	0.000135289	0.00301314	1.20865	1	3.33184	11.7614	3.44584	0.00684336	0.0397755	-3.00212	1	2	MT1G	16	metallothionein 1G [Source:HGNC Symbol;Acc:7399]
ENSG00000125148	2.03402	12.7934	4.5911	0.0011606	0.0121921	-1.03989	1	1.70849	12.7934	3.85633	0.00355215	0.0244826	-2.32466	1	2	MT2A	16	metallothionein 2A [Source:HGNC Symbol;Acc:7406]
ENSG00000125149	-0.686623	6.4536	-4.22892	0.00199557	0.0176665	-1.60426	1	-0.458203	6.4536	-2.82208	0.0191313	0.0851463	-4.04766	0	1	C16orf70	16	chromosome 16 open reading frame 70 [Source:HGNC Symbol;Acc:29564]
ENSG00000125246	-0.325311	4.08153	-1.92135	0.0854207	0.238374	-5.37192	0	-1.20312	4.08153	-7.10586	4.45988e-05	0.00104066	2.27662	1	1	CLYBL	13	citrate lyase beta like [Source:HGNC Symbol;Acc:18355]
ENSG00000125249	-0.83726	8.1542	-4.24646	0.00194305	0.017376	-1.57654	1	0.273007	8.1542	1.38465	0.198075	0.420674	-6.25713	0	1	RAP2A	13	RAP2A, member of RAS oncogene family [Source:HGNC Symbol;Acc:9861]
ENSG00000125257	-0.495069	3.63389	-5.46094	0.000341064	0.00558004	0.240507	0	-0.80656	3.63389	-8.89689	6.90765e-06	0.000297536	4.23266	1	1	ABCC4	13	ATP-binding cassette, sub-family C (CFTR/MRP), member 4 [Source:HGNC Symbol;Acc:55]
ENSG00000125266	0.82602	3.79515	5.21341	0.000477956	0.00677951	-0.112739	1	0.995538	3.79515	6.28332	0.00011811	0.002085	1.24977	1	2	EFNB2	13	ephrin-B2 [Source:HGNC Symbol;Acc:3227]
ENSG00000125354	-0.832354	5.55266	-3.65442	0.00489193	0.0330196	-2.53202	1	-0.23873	5.55266	-1.04814	0.320723	0.561536	-6.64522	0	1	2011-09-06	X	septin 6 [Source:HGNC Symbol;Acc:15848]
ENSG00000125355	0.761621	4.42679	6.19349	0.000132036	0.00294812	1.23413	1	-0.237086	4.42679	-1.92798	0.0845061	0.24302	-5.49471	0	1	FAM70A	X	family with sequence similarity 70, member A [Source:HGNC Symbol;Acc:26086]
ENSG00000125384	-0.0921932	8.22875	-0.357454	0.72863	0.860398	-7.01082	0	0.948026	8.22875	3.67571	0.00472844	0.0301815	-2.62098	1	1	PTGER2	14	prostaglandin E receptor 2 (subtype EP2), 53kDa [Source:HGNC Symbol;Acc:9594]
ENSG00000125430	1.78512	7.04044	5.8643	0.000200445	0.00389544	0.797102	1	2.57673	7.04044	8.46483	1.05267e-05	0.000398816	3.79265	1	2	HS3ST3B1	17	heparan sulfate (glucosamine) 3-O-sulfotransferase 3B1 [Source:HGNC Symbol;Acc:5198]
ENSG00000125454	-0.868388	8.91247	-6.94906	5.33618e-05	0.00168171	2.181	1	0.581141	8.91247	4.65044	0.00106389	0.0100875	-1.06581	0	1	SLC25A19	17	solute carrier family 25 (mitochondrial thiamine pyrophosphate carrier), member 19 [Source:HGNC Symbol;Acc:14409]
ENSG00000125457	-1.36799	7.9502	-7.19004	4.05507e-05	0.00145193	2.46726	1	-0.809087	7.9502	-4.25248	0.00192534	0.0155992	-1.68687	1	2	MIF4GD	17	MIF4G domain containing [Source:HGNC Symbol;Acc:24030]
ENSG00000125458	0.538801	8.26664	5.28865	0.000430965	0.00640161	-0.00442194	0	0.637819	8.26664	6.26056	0.00012148	0.00211744	1.22008	1	1	NT5C	17	5', 3'-nucleotidase, cytosolic [Source:HGNC Symbol;Acc:17144]
ENSG00000125505	0.866176	5.89338	6.41687	0.000100266	0.002481	1.52208	1	0.732231	5.89338	5.42457	0.000358207	0.00459616	0.0793773	1	2	MBOAT7	19	membrane bound O-acyltransferase domain containing 7 [Source:HGNC Symbol;Acc:15505]
ENSG00000125538	3.99877	10.8877	7.22187	3.9126e-05	0.00141828	2.50453	1	6.16337	10.8877	11.1312	9.90648e-07	9.43365e-05	6.23949	1	2	IL1B	2	interleukin 1, beta [Source:HGNC Symbol;Acc:5992]
ENSG00000125629	1.14625	7.06062	5.30921	0.000419006	0.00631187	0.0250351	1	1.01213	7.06062	4.68801	0.00100712	0.00967075	-1.00827	1	2	INSIG2	2	insulin induced gene 2 [Source:HGNC Symbol;Acc:20452]
ENSG00000125630	-1.06805	4.8835	-6.62358	7.81588e-05	0.00212161	1.78248	1	-0.412294	4.8835	-2.55687	0.0298049	0.1181	-4.48961	0	1	POLR1B	2	polymerase (RNA) I polypeptide B, 128kDa [Source:HGNC Symbol;Acc:20454]
ENSG00000125633	0.965099	7.15005	6.19421	0.000131916	0.00294812	1.23508	1	0.658271	7.15005	4.22492	0.00200775	0.0160603	-1.73064	1	2	CCDC93	2	coiled-coil domain containing 93 [Source:HGNC Symbol;Acc:25611]
ENSG00000125637	0.622615	4.80063	3.51147	0.00615415	0.0385201	-2.7679	1	0.823232	4.80063	4.64292	0.00107565	0.0101607	-1.07734	1	2	PSD4	2	pleckstrin and Sec7 domain containing 4 [Source:HGNC Symbol;Acc:19096]
ENSG00000125657	1.24608	4.02071	7.34608	3.40662e-05	0.00133813	2.64874	1	0.129717	4.02071	0.764729	0.463159	0.685041	-6.90463	0	1	TNFSF9	19	tumor necrosis factor (ligand) superfamily, member 9 [Source:HGNC Symbol;Acc:11939]
ENSG00000125691	-0.169553	11.252	-2.03261	0.0712325	0.211412	-5.20167	0	-0.614679	11.252	-7.36879	3.32206e-05	0.000851888	2.58669	1	1	RPL23	17	ribosomal protein L23 [Source:HGNC Symbol;Acc:10316]
ENSG00000125703	-2.35054	6.62855	-10.3763	1.83407e-06	0.000225041	5.65162	1	-1.41556	6.62855	-6.24891	0.000123246	0.00212656	1.20486	1	2	ATG4C	1	ATG4 autophagy related 4 homolog C (S. cerevisiae) [Source:HGNC Symbol;Acc:16040]
ENSG00000125730	-0.282895	9.66112	-1.41125	0.190334	0.402544	-6.08889	0	-1.25633	9.66112	-6.26732	0.000120469	0.00210964	1.2289	1	1	C3	19	complement component 3 [Source:HGNC Symbol;Acc:1318]
ENSG00000125743	-0.440648	10.4882	-3.69688	0.00457159	0.0315779	-2.46228	0	-0.730519	10.4882	-6.1288	0.000143162	0.00239287	1.0468	1	1	SNRPD2	19	small nuclear ribonucleoprotein D2 polypeptide 16.5kDa [Source:HGNC Symbol;Acc:11159]
ENSG00000125744	-0.0604841	4.5522	-0.230445	0.822673	0.913369	-7.05144	0	0.901292	4.5522	3.43393	0.0069768	0.0403117	-3.02197	1	1	RTN2	19	reticulon 2 [Source:HGNC Symbol;Acc:10468]
ENSG00000125753	0.582725	7.81152	3.94102	0.00311072	0.024227	-2.06469	0	1.92696	7.81152	13.0322	2.43739e-07	3.89222e-05	7.65787	1	1	VASP	19	vasodilator-stimulated phosphoprotein [Source:HGNC Symbol;Acc:12652]
ENSG00000125812	0.383026	6.0821	2.11671	0.0620276	0.192659	-5.07054	0	1.18734	6.0821	6.56155	8.41773e-05	0.00163321	1.60707	1	1	GZF1	20	GDNF-inducible zinc finger protein 1 [Source:HGNC Symbol;Acc:15808]
ENSG00000125845	2.76071	4.83288	12.104	4.7166e-07	0.000107308	7.00781	1	3.39875	4.83288	14.9014	7.27433e-08	2.30198e-05	8.85228	1	2	BMP2	20	bone morphogenetic protein 2 [Source:HGNC Symbol;Acc:1069]
ENSG00000125868	0.268297	9.82988	1.57253	0.148775	0.343509	-5.87554	0	0.66629	9.82988	3.90523	0.00328974	0.0232006	-2.24497	1	1	DSTN	20	destrin (actin depolymerizing factor) [Source:HGNC Symbol;Acc:15750]
ENSG00000125871	-1.10529	7.92297	-3.81982	0.00376231	0.0277557	-2.26131	1	-0.45436	7.92297	-1.57024	0.149305	0.351636	-6.01262	0	1	C20orf72	20	chromosome 20 open reading frame 72 [Source:HGNC Symbol;Acc:16205]
ENSG00000125877	-0.406627	7.55871	-4.76023	0.000906912	0.0103078	-0.782456	0	-0.760502	7.55871	-8.90291	6.86807e-06	0.000297491	4.23866	1	1	ITPA	20	inosine triphosphatase (nucleoside triphosphate pyrophosphatase) [Source:HGNC Symbol;Acc:6176]
ENSG00000125901	-0.60847	7.32206	-3.30294	0.00863618	0.0483149	-3.11451	1	-0.236702	7.32206	-1.28488	0.229526	0.458454	-6.3802	0	1	MRPS26	20	mitochondrial ribosomal protein S26 [Source:HGNC Symbol;Acc:14045]
ENSG00000125931	1.22528	4.26948	4.50722	0.00131364	0.0133115	-1.16904	1	2.01308	4.26948	7.40512	3.19149e-05	0.000831724	2.62887	1	2	CITED1	X	Cbp/p300-interacting transactivator, with Glu/Asp-rich carboxy-terminal domain, 1 [Source:HGNC Symbol;Acc:1986]
ENSG00000125952	-0.544105	5.44061	-3.6248	0.0051292	0.0341114	-2.58076	0	-0.646769	5.44061	-4.30874	0.00176805	0.0146371	-1.59781	1	1	MAX	14	MYC associated factor X [Source:HGNC Symbol;Acc:6913]
ENSG00000125962	-1.09044	7.07695	-10.8455	1.24528e-06	0.000172741	6.04154	1	-1.10169	7.07695	-10.9573	1.13789e-06	0.000101758	6.09773	1	2	ARMCX5	X	armadillo repeat containing, X-linked 5 [Source:HGNC Symbol;Acc:25772]
ENSG00000125968	2.33017	5.11157	7.47633	2.95152e-05	0.00120594	2.79794	1	1.0097	5.11157	3.23961	0.00958028	0.0512071	-3.34688	0	1	ID1	20	inhibitor of DNA binding 1, dominant negative helix-loop-helix protein [Source:HGNC Symbol;Acc:5360]
ENSG00000126003	0.967862	4.13583	6.3382	0.000110392	0.00264595	1.42145	1	0.625817	4.13583	4.09826	0.00243755	0.0185737	-1.933	1	2	PLAGL2	20	pleiomorphic adenoma gene-like 2 [Source:HGNC Symbol;Acc:9047]
ENSG00000126216	-0.920779	6.06707	-7.00838	4.98439e-05	0.0016053	2.25215	1	-0.474787	6.06707	-3.61377	0.00522061	0.0323501	-2.72328	0	1	TUBGCP3	13	tubulin, gamma complex associated protein 3 [Source:HGNC Symbol;Acc:18598]
ENSG00000126261	0.937182	8.85045	9.53812	3.80735e-06	0.000342214	4.90998	1	1.09952	8.85045	11.1903	9.45459e-07	9.10172e-05	6.2872	1	2	UBA2	19	ubiquitin-like modifier activating enzyme 2 [Source:HGNC Symbol;Acc:30661]
ENSG00000126524	0.600458	9.53157	4.31273	0.00175744	0.016117	-1.47213	1	0.771667	9.53157	5.54242	0.000305788	0.00411806	0.24618	1	2	SBDS	7	Shwachman-Bodian-Diamond syndrome [Source:HGNC Symbol;Acc:19440]
ENSG00000126561	-0.663733	7.61666	-4.1176	0.0023661	0.0198872	-1.78113	1	-0.615352	7.61666	-3.81745	0.00377639	0.0256652	-2.38817	1	2	STAT5A	17	signal transducer and activator of transcription 5A [Source:HGNC Symbol;Acc:11366]
ENSG00000126602	-1.09864	7.80196	-5.82185	0.000211757	0.00405492	0.739615	1	-0.958164	7.80196	-5.07745	0.000577422	0.00644233	-0.423552	1	2	TRAP1	16	TNF receptor-associated protein 1 [Source:HGNC Symbol;Acc:16264]
ENSG00000126603	0.611713	4.03089	3.56369	0.00565758	0.036429	-2.68154	1	0.843114	4.03089	4.91178	0.000729629	0.00763294	-0.669668	1	2	GLIS2	16	GLIS family zinc finger 2 [Source:HGNC Symbol;Acc:29450]
ENSG00000126759	0.082229	5.48446	0.353596	0.731427	0.861655	-7.0123	0	0.85376	5.48446	3.67129	0.00476196	0.0303295	-2.62828	1	1	CFP	X	complement factor properdin [Source:HGNC Symbol;Acc:8864]
ENSG00000126814	0.418104	7.22174	2.14032	0.0596564	0.187305	-5.0334	0	-0.782448	7.22174	-4.00543	0.00281386	0.0206377	-2.08251	1	1	TRMT5	14	TRM5 tRNA methyltransferase 5 homolog (S. cerevisiae) [Source:HGNC Symbol;Acc:23141]
ENSG00000126858	-1.10412	8.95085	-7.14078	4.28684e-05	0.00149251	2.40934	1	-0.307221	8.95085	-1.98693	0.0767641	0.227707	-5.40464	0	1	RHOT1	17	ras homolog gene family, member T1 [Source:HGNC Symbol;Acc:21168]
ENSG00000126860	-0.712355	9.41267	-3.6257	0.00512182	0.0340771	-2.57928	1	-0.198421	9.41267	-1.00991	0.337774	0.577837	-6.68411	0	1	EVI2A	17	ecotropic viral integration site 2A [Source:HGNC Symbol;Acc:3499]
ENSG00000126882	-1.10882	4.28541	-5.28424	0.000433578	0.00640801	-0.0107507	1	-1.20188	4.28541	-5.72775	0.000239363	0.00344514	0.504483	1	2	FAM78A	9	family with sequence similarity 78, member A [Source:HGNC Symbol;Acc:25465]
ENSG00000126883	-0.67387	6.08205	-6.41566	0.000100414	0.002481	1.52054	1	-0.216578	6.08205	-2.06196	0.0678807	0.208956	-5.28846	0	1	NUP214	9	nucleoporin 214kDa [Source:HGNC Symbol;Acc:8064]
ENSG00000126947	0.821008	7.37633	5.8467	0.000205055	0.00396029	0.773294	1	0.0994896	7.37633	0.708502	0.495792	0.710342	-6.94771	0	1	ARMCX1	X	armadillo repeat containing, X-linked 1 [Source:HGNC Symbol;Acc:18073]
ENSG00000127022	-0.00459135	9.72815	-0.0454977	0.964661	0.983016	-7.07938	0	-0.802632	9.72815	-7.95364	1.77226e-05	0.000557111	3.24692	1	1	CANX	5	calnexin [Source:HGNC Symbol;Acc:1473]
ENSG00000127124	-0.964613	6.94619	-3.58457	0.00547093	0.0355389	-2.64707	1	-0.233233	6.94619	-0.866709	0.407635	0.641131	-6.81919	0	1	HIVEP3	1	human immunodeficiency virus type I enhancer binding protein 3 [Source:HGNC Symbol;Acc:13561]
ENSG00000127334	-1.57988	6.85158	-7.70199	2.31221e-05	0.00103125	3.05163	1	-0.959646	6.85158	-4.67831	0.00102147	0.00978533	-1.02311	1	2	DYRK2	12	dual-specificity tyrosine-(Y)-phosphorylation regulated kinase 2 [Source:HGNC Symbol;Acc:3093]
ENSG00000127359	-0.626087	7.75222	-3.56285	0.0056653	0.0364653	-2.68294	1	-0.661835	7.75222	-3.76628	0.00409456	0.0272821	-2.47201	1	2	-	-	-
ENSG00000127463	-0.623364	6.49725	-4.83671	0.000812298	0.00959132	-0.667364	1	-0.00492286	6.49725	-0.0381967	0.970328	0.987544	-7.21592	0	1	KIAA0090	1	KIAA0090 [Source:HGNC Symbol;Acc:28957]
ENSG00000127481	0.820855	8.31094	8.63106	8.93389e-06	0.00058727	4.03535	1	-0.300755	8.31094	-3.16235	0.010878	0.0564303	-3.47646	0	1	UBR4	1	ubiquitin protein ligase E3 component n-recognin 4 [Source:HGNC Symbol;Acc:30313]
ENSG00000127507	1.08883	5.66584	4.64648	0.00107007	0.0115158	-0.955157	1	1.26853	5.66584	5.41331	0.000363704	0.00465203	0.0633239	1	2	EMR2	19	egf-like module containing, mucin-like, hormone receptor-like 2 [Source:HGNC Symbol;Acc:3337]
ENSG00000127511	-0.660211	5.31045	-5.07261	0.000581348	0.00775292	-0.317636	1	-1.02498	5.31045	-7.87524	1.92403e-05	0.000588465	3.16069	1	2	SIN3B	19	SIN3 homolog B, transcription regulator (yeast) [Source:HGNC Symbol;Acc:19354]
ENSG00000127527	0.402838	4.48558	2.33118	0.0434548	0.150372	-4.72837	0	0.907779	4.48558	5.25322	0.00045244	0.00538887	-0.166721	1	1	EPS15L1	19	epidermal growth factor receptor pathway substrate 15-like 1 [Source:HGNC Symbol;Acc:24634]
ENSG00000127585	-0.222854	4.81165	-0.488373	0.636453	0.80299	-6.95116	0	3.09531	4.81165	6.7832	6.47148e-05	0.00134127	1.88433	1	1	FBXL16	16	F-box and leucine-rich repeat protein 16 [Source:HGNC Symbol;Acc:14150]
ENSG00000127884	-0.670906	8.51156	-4.07169	0.00253949	0.0209842	-1.85449	1	-1.28308	8.51156	-7.78693	2.11217e-05	0.000628548	3.06274	1	2	ECHS1	10	enoyl CoA hydratase, short chain, 1, mitochondrial [Source:HGNC Symbol;Acc:3151]
ENSG00000127920	1.63771	4.89528	5.66442	0.000260118	0.00468559	0.524214	1	0.0124995	4.89528	0.0432326	0.966419	0.98578	-7.2157	0	1	GNG11	7	guanine nucleotide binding protein (G protein), gamma 11 [Source:HGNC Symbol;Acc:4403]
ENSG00000127947	0.469939	10.7913	3.70041	0.00454596	0.0315063	-2.45649	0	1.44065	10.7913	11.344	8.38203e-07	8.58524e-05	6.41009	1	1	PTPN12	7	protein tyrosine phosphatase, non-receptor type 12 [Source:HGNC Symbol;Acc:9645]
ENSG00000127948	0.87707	6.88333	5.30957	0.000418803	0.00631187	0.0255436	1	-0.137853	6.88333	-0.834531	0.424639	0.655438	-6.84715	0	1	POR	7	P450 (cytochrome) oxidoreductase [Source:HGNC Symbol;Acc:9208]
ENSG00000127951	-1.31209	9.12675	-4.45325	0.00142336	0.0139962	-1.25264	1	-1.17504	9.12675	-3.98808	0.00289075	0.0210962	-2.11056	1	2	FGL2	7	fibrinogen-like 2 [Source:HGNC Symbol;Acc:3696]
ENSG00000127952	0.114423	7.61611	1.14226	0.281549	0.508619	-6.40969	0	0.757901	7.61611	7.56597	2.67701e-05	0.000734593	2.81374	1	1	STYXL1	7	serine/threonine/tyrosine interacting-like 1 [Source:HGNC Symbol;Acc:18165]
ENSG00000127955	0.236544	3.49092	0.845425	0.418829	0.644355	-6.70223	0	1.32742	3.49092	4.74431	0.000928043	0.00911334	-0.922416	1	1	GNAI1	7	guanine nucleotide binding protein (G protein), alpha inhibiting activity polypeptide 1 [Source:HGNC Symbol;Acc:4384]
ENSG00000127995	-1.15762	6.47507	-6.396	0.00010285	0.00251305	1.49547	1	-0.944698	6.47507	-5.21959	0.000473896	0.00556576	-0.215523	1	2	CASD1	7	CAS1 domain containing 1 [Source:HGNC Symbol;Acc:16014]
ENSG00000128050	-0.837791	6.33955	-5.3539	0.000394227	0.00611364	0.0888479	1	-1.16253	6.33955	-7.42915	3.1082e-05	0.000817531	2.65669	1	2	PAICS	4	phosphoribosylaminoimidazole carboxylase, phosphoribosylaminoimidazole succinocarboxamide synthetase [Source:HGNC Symbol;Acc:8587]
ENSG00000128059	-1.25303	5.98716	-4.1023	0.00242246	0.0202258	-1.80555	1	-1.08081	5.98716	-3.53847	0.00589198	0.0355233	-2.84806	1	2	PPAT	4	phosphoribosyl pyrophosphate amidotransferase [Source:HGNC Symbol;Acc:9238]
ENSG00000128203	0.0671065	5.42857	0.562294	0.587045	0.772366	-6.90974	0	1.63832	5.42857	13.7277	1.52728e-07	3.09265e-05	8.12315	1	1	ASPHD2	22	aspartate beta-hydroxylase domain containing 2 [Source:HGNC Symbol;Acc:30437]
ENSG00000128245	-1.07143	9.58772	-5.87372	0.000198027	0.00387363	0.809813	1	-0.131503	9.58772	-0.720917	0.488465	0.70506	-6.93845	0	1	YWHAH	22	tyrosine 3-monooxygenase/tryptophan 5-monooxygenase activation protein, eta polypeptide [Source:HGNC Symbol;Acc:12853]
ENSG00000128274	0.530459	4.46625	4.82643	0.000824373	0.00964341	-0.682781	0	0.756019	4.46625	6.87871	5.78885e-05	0.00124782	2.00183	1	1	A4GALT	22	alpha 1,4-galactosyltransferase [Source:HGNC Symbol;Acc:18149]
ENSG00000128294	0.230041	8.42925	1.88342	0.0908391	0.248187	-5.42903	0	-0.898037	8.42925	-7.35252	3.38238e-05	0.000857858	2.56775	1	1	TPST2	22	tyrosylprotein sulfotransferase 2 [Source:HGNC Symbol;Acc:12021]
ENSG00000128340	0.871379	8.0673	2.80697	0.0196197	0.0861517	-3.94393	0	1.23781	8.0673	3.98736	0.002894	0.0211112	-2.11173	1	1	RAC2	22	ras-related C3 botulinum toxin substrate 2 (rho family, small GTP binding protein Rac2) [Source:HGNC Symbol;Acc:9802]
ENSG00000128342	1.27849	3.768	5.95232	0.000179021	0.00365448	0.915457	1	0.440722	3.768	2.05188	0.069014	0.211204	-5.30415	0	1	LIF	22	leukemia inhibitory factor (cholinergic differentiation factor) [Source:HGNC Symbol;Acc:6596]
ENSG00000128578	1.19017	3.91147	6.67198	7.37866e-05	0.00202162	1.84263	1	0.362314	3.91147	2.03109	0.0714096	0.216192	-5.33645	0	1	FAM40B	7	family with sequence similarity 40, member B [Source:HGNC Symbol;Acc:22209]
ENSG00000128595	-0.112533	7.63328	-0.944005	0.368748	0.596423	-6.61301	0	-0.58808	7.63328	-4.93323	0.000707701	0.00746662	-0.637583	1	1	CALU	7	calumenin [Source:HGNC Symbol;Acc:1458]
ENSG00000128610	0.621633	3.0011	4.59279	0.00115773	0.0121838	-1.0373	1	-0.0530733	3.0011	-0.392119	0.703694	0.849874	-7.13282	0	1	FEZF1	7	FEZ family zinc finger 1 [Source:HGNC Symbol;Acc:22788]
ENSG00000128641	1.67769	4.3815	3.26715	0.00915725	0.0503734	-3.17423	0	2.05158	4.3815	3.99527	0.00285862	0.020905	-2.09893	1	1	MYO1B	2	myosin IB [Source:HGNC Symbol;Acc:7596]
ENSG00000128683	0.60429	4.38245	3.25249	0.00937987	0.051133	-3.19869	0	2.60393	4.38245	14.0152	1.26687e-07	2.82513e-05	8.30802	1	1	GAD1	2	glutamate decarboxylase 1 (brain, 67kDa) [Source:HGNC Symbol;Acc:4092]
ENSG00000128694	-0.912034	4.42836	-4.51019	0.00130786	0.0132875	-1.16445	1	-0.650731	4.42836	-3.21799	0.00992639	0.052483	-3.38312	0	1	OSGEPL1	2	O-sialoglycoprotein endopeptidase-like 1 [Source:HGNC Symbol;Acc:23075]
ENSG00000128791	1.01796	6.42273	6.15907	0.000137834	0.00304341	1.18915	1	1.45827	6.42273	8.8231	7.41428e-06	0.000316265	4.15883	1	2	TWSG1	18	twisted gastrulation homolog 1 (Drosophila) [Source:HGNC Symbol;Acc:12429]
ENSG00000128805	-1.7917	7.16417	-11.7303	6.23217e-07	0.000117704	6.7323	1	-1.79193	7.16417	-11.7318	6.22505e-07	7.16776e-05	6.71284	1	2	ARHGAP22	10	Rho GTPase activating protein 22 [Source:HGNC Symbol;Acc:30320]
ENSG00000128815	-0.712932	7.98416	-3.87412	0.00345423	0.0260501	-2.17304	1	-0.444773	7.98416	-2.41693	0.0376619	0.139515	-4.71994	0	1	WDFY4	10	WDFY family member 4 [Source:HGNC Symbol;Acc:29323]
ENSG00000128829	-1.09132	7.14085	-5.57786	0.000291688	0.00500516	0.40426	1	-1.22743	7.14085	-6.27353	0.000119547	0.00210186	1.237	1	2	EIF2AK4	15	eukaryotic translation initiation factor 2 alpha kinase 4 [Source:HGNC Symbol;Acc:19687]
ENSG00000128872	-0.318925	3.85531	-1.78921	0.105714	0.274201	-5.56861	0	0.706484	3.85531	3.96346	0.00300369	0.021659	-2.15043	1	1	TMOD2	15	tropomodulin 2 (neuronal) [Source:HGNC Symbol;Acc:11872]
ENSG00000128915	-0.639406	4.73786	-6.28293	0.000118166	0.00274863	1.35025	1	-0.449766	4.73786	-4.41949	0.00149693	0.0129909	-1.42369	0	1	NARG2	15	NMDA receptor regulated 2 [Source:HGNC Symbol;Acc:29885]
ENSG00000128918	0.214539	3.60842	1.12858	0.286996	0.515286	-6.42468	0	0.674456	3.60842	3.54797	0.00580258	0.0350683	-2.83231	1	1	ALDH1A2	15	aldehyde dehydrogenase 1 family, member A2 [Source:HGNC Symbol;Acc:15472]
ENSG00000128944	-0.641106	6.99297	-3.64057	0.00500145	0.0334765	-2.55481	1	-0.16289	6.99297	-0.924981	0.378062	0.615955	-6.76629	0	1	C15orf23	15	chromosome 15 open reading frame 23 [Source:HGNC Symbol;Acc:30767]
ENSG00000128973	-0.532065	5.35346	-3.86339	0.00351293	0.0263687	-2.19046	0	-0.608706	5.35346	-4.41989	0.00149604	0.0129895	-1.42307	1	1	CLN6	15	ceroid-lipofuscinosis, neuronal 6, late infantile, variant [Source:HGNC Symbol;Acc:2077]
ENSG00000129007	-0.594272	5.71988	-3.83783	0.00365708	0.0271958	-2.23201	1	-0.259466	5.71988	-1.67564	0.126622	0.31687	-5.86577	0	1	CALML4	15	calmodulin-like 4 [Source:HGNC Symbol;Acc:18445]
ENSG00000129028	0.1785	5.96646	0.940487	0.370458	0.597816	-6.61633	0	0.994415	5.96646	5.2394	0.000461128	0.00545947	-0.186755	1	1	THAP10	15	THAP domain containing 10 [Source:HGNC Symbol;Acc:23193]
ENSG00000129116	1.53496	5.35959	5.74783	0.00023316	0.00435587	0.638788	1	-1.04613	5.35959	-3.91735	0.00322794	0.0228748	-2.22527	1	2	PALLD	4	palladin, cytoskeletal associated protein [Source:HGNC Symbol;Acc:17068]
ENSG00000129187	-0.391071	8.00798	-2.90854	0.0165641	0.0763871	-3.77418	0	-0.702538	8.00798	-5.22504	0.000470347	0.00554626	-0.207605	1	1	DCTD	4	dCMP deaminase [Source:HGNC Symbol;Acc:2710]
ENSG00000129226	-0.608175	10.5317	-4.82682	0.000823906	0.00964341	-0.682189	1	-0.875074	10.5317	-6.94509	5.36065e-05	0.0011894	2.08282	1	2	CD68	17	CD68 molecule [Source:HGNC Symbol;Acc:1693]
ENSG00000129245	0.748233	7.01304	6.61322	7.91305e-05	0.00214468	1.76957	1	0.914924	7.01304	8.08651	1.54406e-05	0.000511311	3.39148	1	2	FXR2	17	fragile X mental retardation, autosomal homolog 2 [Source:HGNC Symbol;Acc:4024]
ENSG00000129277	0.506436	11.9702	2.02881	0.0716771	0.21226	-5.20754	0	2.39726	11.9702	9.60354	3.58955e-06	0.000202006	4.91348	1	1	CCL4	17	chemokine (C-C motif) ligand 4 [Source:HGNC Symbol;Acc:10630]
ENSG00000129347	-0.839707	6.48983	-4.87763	0.000766057	0.00926898	-0.606119	1	-0.479949	6.48983	-2.7879	0.0202545	0.0888506	-4.10489	0	1	KRI1	19	KRI1 homolog (S. cerevisiae) [Source:HGNC Symbol;Acc:25769]
ENSG00000129355	0.958501	6.32225	2.75786	0.0212966	0.0909533	-4.02586	0	1.79414	6.32225	5.1622	0.000513068	0.00590766	-0.299158	1	1	CDKN2D	19	cyclin-dependent kinase inhibitor 2D (p19, inhibits CDK4) [Source:HGNC Symbol;Acc:1790]
ENSG00000129465	0.452345	5.88329	3.20299	0.0101742	0.0541091	-3.2814	0	1.90741	5.88329	13.5061	1.7683e-07	3.34287e-05	7.97775	1	1	RIPK3	14	receptor-interacting serine-threonine kinase 3 [Source:HGNC Symbol;Acc:10021]
ENSG00000129467	0.32341	5.1329	1.74357	0.113703	0.288134	-5.63498	0	0.94411	5.1329	5.0899	0.000567451	0.00634314	-0.405218	1	1	ADCY4	14	adenylate cyclase 4 [Source:HGNC Symbol;Acc:235]
ENSG00000129480	-1.12406	6.58177	-4.51619	0.00129628	0.0131888	-1.15518	1	-1.07531	6.58177	-4.32032	0.00173742	0.0144719	-1.57954	1	2	C14orf126	14	chromosome 14 open reading frame 126 [Source:HGNC Symbol;Acc:20277]
ENSG00000129484	-0.611426	6.13797	-3.32517	0.00832796	0.0470991	-3.07743	1	-0.28929	6.13797	-1.57328	0.148603	0.350601	-6.00846	0	1	PARP2	14	poly (ADP-ribose) polymerase 2 [Source:HGNC Symbol;Acc:272]
ENSG00000129515	-0.600404	9.45079	-2.76704	0.0209726	0.0899822	-4.01056	0	-0.869659	9.45079	-4.00793	0.00280297	0.0205921	-2.07848	1	1	SNX6	14	sorting nexin 6 [Source:HGNC Symbol;Acc:14970]
ENSG00000129521	0.627212	3.37309	3.28811	0.00884815	0.0491728	-3.13923	1	0.13351	3.37309	0.699918	0.500897	0.714344	-6.95402	0	1	EGLN3	14	egl nine homolog 3 (C. elegans) [Source:HGNC Symbol;Acc:14661]
ENSG00000129534	-1.15999	7.35426	-5.13102	0.0005358	0.00728895	-0.232282	1	-0.694471	7.35426	-3.07189	0.0126305	0.0627501	-3.62837	0	1	MIS18BP1	14	MIS18 binding protein 1 [Source:HGNC Symbol;Acc:20190]
ENSG00000129646	0.31405	3.97348	1.86047	0.0942708	0.254407	-5.46333	0	0.780229	3.97348	4.62218	0.00110882	0.0103629	-1.10921	1	1	QRICH2	17	glutamine rich 2 [Source:HGNC Symbol;Acc:25326]
ENSG00000129680	-0.447472	5.25102	-3.35534	0.00792804	0.0455688	-3.02718	0	-0.619879	5.25102	-4.64812	0.0010675	0.0101015	-1.06936	1	1	MAP7D3	X	MAP7 domain containing 3 [Source:HGNC Symbol;Acc:25742]
ENSG00000129682	0.644195	3.3473	3.8266	0.00372235	0.0275648	-2.25029	1	0.0692858	3.3473	0.411566	0.689865	0.842417	-7.12437	0	1	FGF13	X	fibroblast growth factor 13 [Source:HGNC Symbol;Acc:3670]
ENSG00000129757	2.11381	5.66314	4.33306	0.00170433	0.015753	-1.44021	1	-1.75676	5.66314	-3.60116	0.00532727	0.032838	-2.74416	1	2	CDKN1C	11	cyclin-dependent kinase inhibitor 1C (p57, Kip2) [Source:HGNC Symbol;Acc:1786]
ENSG00000130024	1.18184	7.71798	7.27916	3.6697e-05	0.0013639	2.57128	1	1.44711	7.71798	8.913	6.8022e-06	0.000296149	4.24871	1	2	PHF10	6	PHD finger protein 10 [Source:HGNC Symbol;Acc:18250]
ENSG00000130066	-0.11759	11.945	-0.75784	0.467081	0.684051	-6.77439	0	-1.11389	11.945	-7.17876	4.10692e-05	0.000993841	2.36345	1	1	SAT1	X	spermidine/spermine N1-acetyltransferase 1 [Source:HGNC Symbol;Acc:10540]
ENSG00000130119	-0.766671	8.83615	-6.48941	9.1818e-05	0.00234429	1.61412	1	-0.59385	8.83615	-5.02659	0.000620166	0.00677073	-0.498701	1	2	GNL3L	X	guanine nucleotide binding protein-like 3 (nucleolar)-like [Source:HGNC Symbol;Acc:25553]
ENSG00000130150	-0.840628	8.0532	-7.05395	4.73125e-05	0.00154952	2.30651	1	-0.343019	8.0532	-2.87837	0.0174175	0.0797663	-3.9533	0	1	MOSPD2	X	motile sperm domain containing 2 [Source:HGNC Symbol;Acc:28381]
ENSG00000130159	-0.784809	4.93747	-3.39098	0.00748093	0.0438137	-2.96785	1	-0.691738	4.93747	-2.98884	0.0144942	0.0695571	-3.76786	0	1	ECSIT	19	ECSIT homolog (Drosophila) [Source:HGNC Symbol;Acc:29548]
ENSG00000130177	-0.640297	8.11444	-5.01747	0.000628178	0.00815192	-0.398667	1	-0.63533	8.11444	-4.97855	0.000663661	0.00713345	-0.570012	1	2	CDC16	13	cell division cycle 16 homolog (S. cerevisiae) [Source:HGNC Symbol;Acc:1720]
ENSG00000130202	0.629861	8.41984	3.73119	0.00432884	0.0306024	-2.40605	1	1.98264	8.41984	11.7448	6.16398e-07	7.16776e-05	6.72285	1	2	PVRL2	19	poliovirus receptor-related 2 (herpesvirus entry mediator B) [Source:HGNC Symbol;Acc:9707]
ENSG00000130203	-0.539238	11.5244	-2.97124	0.014924	0.071097	-3.66925	0	-0.810904	11.5244	-4.46814	0.00139214	0.0123616	-1.3477	1	1	APOE	19	apolipoprotein E [Source:HGNC Symbol;Acc:613]
ENSG00000130208	-0.644673	11.5536	-2.23233	0.0512221	0.168793	-4.88732	0	-1.63071	11.5536	-5.64671	0.000266263	0.00373171	0.392143	1	1	APOC1	19	apolipoprotein C-I [Source:HGNC Symbol;Acc:607]
ENSG00000130222	0.689074	8.0374	3.55267	0.0057588	0.0368116	-2.69975	1	0.526409	8.0374	2.71401	0.0229156	0.0972078	-4.22838	0	1	GADD45G	9	growth arrest and DNA-damage-inducible, gamma [Source:HGNC Symbol;Acc:4097]
ENSG00000130303	0.179646	10.9945	1.00965	0.337895	0.56829	-6.5491	0	-0.760109	10.9945	-4.27196	0.00186927	0.0152528	-1.65599	1	1	BST2	19	bone marrow stromal cell antigen 2 [Source:HGNC Symbol;Acc:1119]
ENSG00000130305	-0.670301	6.5232	-5.2279	0.000468492	0.0066997	-0.0918099	1	-0.305035	6.5232	-2.37907	0.0401191	0.146028	-4.78176	0	1	NSUN5	7	NOP2/Sun domain family, member 5 [Source:HGNC Symbol;Acc:16385]
ENSG00000130309	-0.723241	7.56417	-4.78716	0.000872318	0.00999195	-0.741836	1	-0.349566	7.56417	-2.31379	0.0447324	0.156833	-4.8878	0	1	GLT25D1	19	glycosyltransferase 25 domain containing 1 [Source:HGNC Symbol;Acc:26182]
ENSG00000130311	0.407343	5.98153	2.56568	0.0293686	0.11434	-4.34481	0	0.700423	5.98153	4.41167	0.00151455	0.0131179	-1.43594	1	1	DDA1	19	DET1 and DDB1 associated 1 [Source:HGNC Symbol;Acc:28360]
ENSG00000130340	0.736892	8.84581	5.92436	0.000185546	0.00374021	0.877973	1	0.118097	8.84581	0.949461	0.366108	0.605324	-6.74321	0	1	SNX9	6	sorting nexin 9 [Source:HGNC Symbol;Acc:14973]
ENSG00000130347	-0.994928	4.78774	-4.50356	0.00132078	0.0133549	-1.1747	1	0.000476745	4.78774	0.002158	0.998323	0.999671	-7.21672	0	1	RTN4IP1	6	reticulon 4 interacting protein 1 [Source:HGNC Symbol;Acc:18647]
ENSG00000130348	-0.829496	4.9287	-4.68413	0.00101284	0.0111034	-0.897794	1	-0.243382	4.9287	-1.37437	0.201138	0.424365	-6.27009	0	1	QRSL1	6	glutaminyl-tRNA synthase (glutamine-hydrolyzing)-like 1 [Source:HGNC Symbol;Acc:21020]
ENSG00000130396	0.728488	3.57368	7.33235	3.45886e-05	0.00133813	2.63289	1	0.749419	3.57368	7.54303	2.7445e-05	0.000743845	2.78756	1	2	MLLT4	6	myeloid/lymphoid or mixed-lineage leukemia (trithorax homolog, Drosophila); translocated to, 4 [Source:HGNC Symbol;Acc:7137]
ENSG00000130413	0.271048	4.55089	2.08132	0.065753	0.200584	-5.12596	0	3.13141	4.55089	24.0455	8.94658e-10	1.97015e-06	12.8541	1	1	STK33	11	serine/threonine kinase 33 [Source:HGNC Symbol;Acc:14568]
ENSG00000130475	-0.651596	3.62884	-5.59534	0.000284996	0.00494657	0.428567	1	-0.0329369	3.62884	-0.282834	0.783421	0.894852	-7.1729	0	1	FCHO1	19	FCH domain only 1 [Source:HGNC Symbol;Acc:29002]
ENSG00000130489	-0.0332629	9.08082	-0.184195	0.857765	0.931262	-7.06192	0	1.09057	9.08082	6.03907	0.00016031	0.00258625	0.927422	1	1	SCO2	22	SCO cytochrome oxidase deficient homolog 2 (yeast) [Source:HGNC Symbol;Acc:10604]
ENSG00000130522	0.992105	4.31787	4.91385	0.000727486	0.0089831	-0.552122	1	0.598716	4.31787	2.96541	0.0150693	0.0717113	-3.80721	0	1	JUND	19	jun D proto-oncogene [Source:HGNC Symbol;Acc:6206]
ENSG00000130560	-1.15679	8.56925	-6.9802	5.14823e-05	0.00164305	2.21841	1	-0.273628	8.56925	-1.6511	0.131606	0.32513	-5.90043	0	1	UBAC1	9	UBA domain containing 1 [Source:HGNC Symbol;Acc:30221]
ENSG00000130584	0.254398	5.57597	1.92056	0.0855308	0.238568	-5.37312	0	0.701295	5.57597	5.29438	0.000427596	0.00519515	-0.107224	1	1	ZBTB46	20	zinc finger and BTB domain containing 46 [Source:HGNC Symbol;Acc:16094]
ENSG00000130592	-0.967846	6.9578	-4.94372	0.000697234	0.00868069	-0.507722	1	-0.797295	6.9578	-4.07255	0.00253612	0.0190935	-1.97431	1	2	LSP1	11	lymphocyte-specific protein 1 [Source:HGNC Symbol;Acc:6707]
ENSG00000130598	-0.571343	4.27251	-4.18668	0.00212837	0.0185255	-1.67119	0	-1.16833	4.27251	-8.56125	9.56816e-06	0.000378103	3.89249	1	1	TNNI2	11	troponin I type 2 (skeletal, fast) [Source:HGNC Symbol;Acc:11946]
ENSG00000130638	-0.658953	8.61173	-5.65034	0.000264991	0.00474426	0.504779	1	-0.729362	8.61173	-6.25408	0.000122459	0.00212389	1.21162	1	2	ATXN10	22	ataxin 10 [Source:HGNC Symbol;Acc:10549]
ENSG00000130699	-0.79085	7.72354	-4.74511	0.000926967	0.0104615	-0.805298	1	-0.252364	7.72354	-1.51419	0.162785	0.37109	-6.08845	0	1	TAF4	20	TAF4 RNA polymerase II, TATA box binding protein (TBP)-associated factor, 135kDa [Source:HGNC Symbol;Acc:11537]
ENSG00000130713	-1.21502	5.45124	-8.58229	9.37194e-06	0.000601864	3.98603	1	-0.582296	5.45124	-4.11305	0.00238269	0.0182742	-1.90927	0	1	EXOSC2	9	exosome component 2 [Source:HGNC Symbol;Acc:17097]
ENSG00000130714	0.164342	4.93789	1.37114	0.202108	0.416389	-6.13966	0	0.834266	4.93789	6.96047	5.26644e-05	0.0011741	2.1015	1	1	POMT1	9	protein-O-mannosyltransferase 1 [Source:HGNC Symbol;Acc:9202]
ENSG00000130725	0.198459	7.9521	1.2053	0.257491	0.482987	-6.33885	0	0.669584	7.9521	4.06659	0.00255957	0.019223	-1.98389	1	1	UBE2M	19	ubiquitin-conjugating enzyme E2M [Source:HGNC Symbol;Acc:12491]
ENSG00000130726	1.02273	8.11959	11.0402	1.06494e-06	0.00016314	6.19839	1	1.83956	8.11959	19.8578	5.25508e-09	4.20813e-06	11.3214	1	2	TRIM28	19	tripartite motif containing 28 [Source:HGNC Symbol;Acc:16384]
ENSG00000130741	-0.762669	9.21463	-6.54359	8.60133e-05	0.00226164	1.68239	1	-0.724915	9.21463	-6.21966	0.000127803	0.00219873	1.16655	1	2	EIF2S3	X	eukaryotic translation initiation factor 2, subunit 3 gamma, 52kDa [Source:HGNC Symbol;Acc:3267]
ENSG00000130751	0.676522	4.24878	4.55057	0.00123201	0.0126852	-1.10216	1	-0.0923123	4.24878	-0.620932	0.549372	0.749907	-7.00886	0	1	NPAS1	19	neuronal PAS domain protein 1 [Source:HGNC Symbol;Acc:7894]
ENSG00000130766	1.81926	7.09274	10.2414	2.05584e-06	0.00023518	5.53622	1	1.47238	7.09274	8.28865	1.25612e-05	0.000445254	3.60773	1	2	SESN2	1	sestrin 2 [Source:HGNC Symbol;Acc:20746]
ENSG00000130811	-0.59157	9.18671	-5.04129	0.000607469	0.00794661	-0.363608	1	-0.184243	9.18671	-1.5701	0.149336	0.351636	-6.01281	0	1	EIF3G	19	eukaryotic translation initiation factor 3, subunit G [Source:HGNC Symbol;Acc:3274]
ENSG00000130816	-1.31942	9.69487	-9.68759	3.32956e-06	0.000317064	5.04669	1	0.0312425	9.69487	0.229392	0.823468	0.916484	-7.18786	0	1	DNMT1	19	DNA (cytosine-5-)-methyltransferase 1 [Source:HGNC Symbol;Acc:2976]
ENSG00000130826	-1.09387	8.00896	-8.12843	1.47887e-05	0.000784738	3.51493	1	-0.598438	8.00896	-4.44694	0.00143681	0.0126246	-1.38077	1	2	DKC1	X	dyskeratosis congenita 1, dyskerin [Source:HGNC Symbol;Acc:2890]
ENSG00000130830	-1.55618	9.51632	-8.64326	8.82781e-06	0.000585519	4.04766	1	-1.69089	9.51632	-9.39149	4.35005e-06	0.000226468	4.71402	1	2	MPP1	X	membrane protein, palmitoylated 1, 55kDa [Source:HGNC Symbol;Acc:7219]
ENSG00000130881	0.265396	3.96646	1.62373	0.137374	0.326382	-5.80496	0	0.825777	3.96646	5.05221	0.000598223	0.00660746	-0.460796	1	1	LRP3	19	low density lipoprotein receptor-related protein 3 [Source:HGNC Symbol;Acc:6695]
ENSG00000130935	-0.777908	7.42621	-4.99157	0.000651558	0.00834799	-0.43688	1	-0.524665	7.42621	-3.36659	0.0077839	0.0435468	-3.13435	0	1	NOL11	17	nucleolar protein 11 [Source:HGNC Symbol;Acc:24557]
ENSG00000130939	-0.460982	7.14521	-3.75445	0.004172	0.0298429	-2.368	0	-0.625127	7.14521	-5.09132	0.000566324	0.00633742	-0.403126	1	1	UBE4B	1	ubiquitination factor E4B [Source:HGNC Symbol;Acc:12500]
ENSG00000131015	2.05467	3.49217	7.09577	4.51126e-05	0.00153426	2.35615	1	0.574004	3.49217	1.98231	0.077345	0.228968	-5.41173	0	1	ULBP2	6	UL16 binding protein 2 [Source:HGNC Symbol;Acc:14894]
ENSG00000131061	-1.29778	4.59793	-6.37811	0.000105123	0.00255089	1.47261	1	0.570649	4.59793	2.80454	0.0196996	0.0870668	-4.07704	0	1	ZNF341	20	zinc finger protein 341 [Source:HGNC Symbol;Acc:15992]
ENSG00000131089	-0.841995	5.32529	-4.96295	0.00067848	0.00853419	-0.479216	1	-0.180192	5.32529	-1.0621	0.31466	0.555164	-6.63074	0	1	ARHGEF9	X	Cdc42 guanine nucleotide exchange factor (GEF) 9 [Source:HGNC Symbol;Acc:14561]
ENSG00000131149	1.52711	7.99091	4.94761	0.000693403	0.0086535	-0.501961	1	1.31698	7.99091	4.26681	0.00188393	0.0153496	-1.66415	1	2	KIAA0182	16	KIAA0182 [Source:HGNC Symbol;Acc:28979]
ENSG00000131187	-0.0474325	4.36814	-0.173806	0.865696	0.935298	-7.06396	0	1.15414	4.36814	4.22911	0.001995	0.0159974	-1.72399	1	1	F12	5	coagulation factor XII (Hageman factor) [Source:HGNC Symbol;Acc:3530]
ENSG00000131203	1.69265	8.29086	5.74261	0.000234757	0.00438106	0.631641	1	5.66877	8.29086	19.2323	7.05746e-09	5.18047e-06	11.0547	1	2	IDO1	8	indoleamine 2,3-dioxygenase 1 [Source:HGNC Symbol;Acc:6059]
ENSG00000131238	-0.290359	9.26628	-3.04906	0.0131168	0.0650011	-3.53896	0	-1.39799	9.26628	-14.6803	8.33014e-08	2.40854e-05	8.71995	1	1	PPT1	1	palmitoyl-protein thioesterase 1 [Source:HGNC Symbol;Acc:9325]
ENSG00000131269	-0.644754	8.40616	-3.48156	0.00645884	0.0397434	-2.81745	1	-0.669373	8.40616	-3.6145	0.00521455	0.0323353	-2.72208	1	2	ABCB7	X	ATP-binding cassette, sub-family B (MDR/TAP), member 7 [Source:HGNC Symbol;Acc:48]
ENSG00000131355	-0.00549089	4.42747	-0.0275471	0.978598	0.990451	-7.0801	0	4.84635	4.42747	24.3136	8.07147e-10	1.97015e-06	12.9393	1	1	EMR3	19	egf-like module containing, mucin-like, hormone receptor-like 3 [Source:HGNC Symbol;Acc:23647]
ENSG00000131368	-0.774244	5.01564	-6.80273	6.32506e-05	0.00180891	2.00355	1	-0.95018	5.01564	-8.34856	1.18248e-05	0.000431301	3.67098	1	2	MRPS25	3	mitochondrial ribosomal protein S25 [Source:HGNC Symbol;Acc:14511]
ENSG00000131378	0.242496	8.44483	1.67108	0.127534	0.310387	-5.73858	0	1.22604	8.44483	8.4488	1.0696e-05	0.000402788	3.77596	1	1	RFTN1	3	raftlin, lipid raft linker 1 [Source:HGNC Symbol;Acc:30278]
ENSG00000131459	2.45117	4.13277	14.4394	9.67665e-08	4.37111e-05	8.54132	1	0.499788	4.13277	2.94416	0.0156111	0.0736335	-3.8429	0	1	GFPT2	5	glutamine-fructose-6-phosphate transaminase 2 [Source:HGNC Symbol;Acc:4242]
ENSG00000131462	-0.54686	7.97608	-4.39525	0.00155225	0.0148295	-1.34292	0	0.616078	7.97608	4.95158	0.000689507	0.00731309	-0.610194	1	1	TUBG1	17	tubulin, gamma 1 [Source:HGNC Symbol;Acc:12417]
ENSG00000131469	-0.219808	11.816	-2.48688	0.0335064	0.125562	-4.47456	0	-0.754769	11.816	-8.53935	9.77722e-06	0.000381074	3.86989	1	1	RPL27	17	ribosomal protein L27 [Source:HGNC Symbol;Acc:10328]
ENSG00000131652	-0.422911	7.40883	-2.97905	0.0147316	0.0703707	-3.65617	0	-0.638199	7.40883	-4.49558	0.00133652	0.0119702	-1.30499	1	1	THOC6	16	THO complex 6 homolog (Drosophila) [Source:HGNC Symbol;Acc:28369]
ENSG00000131669	0.638073	9.60916	4.69616	0.000995253	0.0109927	-0.87951	1	0.111636	9.60916	0.821633	0.431589	0.661214	-6.8581	0	1	NINJ1	9	ninjurin 1 [Source:HGNC Symbol;Acc:7824]
ENSG00000131773	1.84841	5.18108	8.11282	1.50279e-05	0.000795033	3.49833	1	0.275566	5.18108	1.20949	0.255954	0.490178	-6.46891	0	1	KHDRBS3	8	KH domain containing, RNA binding, signal transduction associated 3 [Source:HGNC Symbol;Acc:18117]
ENSG00000131779	-0.826254	6.26134	-5.64284	0.000267628	0.00477207	0.494411	1	-0.0165686	6.26134	-0.113154	0.912283	0.960709	-7.20969	0	1	PEX11B	1	peroxisomal biogenesis factor 11 beta [Source:HGNC Symbol;Acc:8853]
ENSG00000131788	0.116575	4.99012	1.21639	0.253437	0.478081	-6.3261	0	0.634165	4.99012	6.61711	7.87635e-05	0.00155289	1.67718	1	1	PIAS3	1	protein inhibitor of activated STAT, 3 [Source:HGNC Symbol;Acc:16861]
ENSG00000131873	0.930336	3.69076	5.07527	0.000579187	0.00773581	-0.31374	1	0.673902	3.69076	3.67634	0.0047237	0.0301622	-2.61994	1	2	CHSY1	15	chondroitin sulfate synthase 1 [Source:HGNC Symbol;Acc:17198]
ENSG00000131899	0.0570493	5.53492	0.529715	0.608566	0.785257	-6.92867	0	0.639614	5.53492	5.93895	0.00018211	0.00282166	0.792892	1	1	LLGL1	17	lethal giant larvae homolog 1 (Drosophila) [Source:HGNC Symbol;Acc:6628]
ENSG00000131941	-0.167028	3.28897	-1.24129	0.24452	0.468247	-6.29717	0	-0.728757	3.28897	-5.41584	0.000362461	0.00464398	0.0669324	1	1	RHPN2	19	rhophilin, Rho GTPase binding protein 2 [Source:HGNC Symbol;Acc:19974]
ENSG00000131979	0.602305	9.08055	2.95151	0.0154215	0.0726024	-3.70227	0	2.86124	9.08055	14.0211	1.26213e-07	2.82513e-05	8.31172	1	1	GCH1	14	GTP cyclohydrolase 1 [Source:HGNC Symbol;Acc:4193]
ENSG00000131981	-0.442977	13.0083	-4.14279	0.00227629	0.019326	-1.74097	0	-1.06978	13.0083	-10.0048	2.51913e-06	0.000165838	5.28008	1	1	LGALS3	14	lectin, galactoside-binding, soluble, 3 [Source:HGNC Symbol;Acc:6563]
ENSG00000132002	2.53823	7.1196	8.42715	1.09295e-05	0.000646125	3.82746	1	0.888675	7.1196	2.95048	0.0154479	0.0730006	-3.83228	0	1	DNAJB1	19	DnaJ (Hsp40) homolog, subfamily B, member 1 [Source:HGNC Symbol;Acc:5270]
ENSG00000132199	-0.510669	8.06302	-2.43376	0.0366177	0.133908	-4.56157	0	-1.11347	8.06302	-5.30657	0.00042052	0.00513752	-0.0896424	1	1	ENOSF1	18	enolase superfamily member 1 [Source:HGNC Symbol;Acc:30365]
ENSG00000132205	-0.678022	9.3109	-5.2855	0.000432831	0.00640234	-0.00894433	1	-0.0452148	9.3109	-0.35247	0.732244	0.865942	-7.14883	0	1	EMILIN2	18	elastin microfibril interfacer 2 [Source:HGNC Symbol;Acc:19881]
ENSG00000132256	-0.71217	3.714	-3.33546	0.00818926	0.0465688	-3.06029	1	-0.140713	3.714	-0.659033	0.525655	0.73245	-6.98315	0	1	TRIM5	11	tripartite motif containing 5 [Source:HGNC Symbol;Acc:16276]
ENSG00000132300	-0.867765	6.48446	-5.79323	0.00021977	0.00415863	0.700724	1	-0.53257	6.48446	-3.55546	0.00573304	0.0347195	-2.81988	0	1	PTCD3	2	Pentatricopeptide repeat domain 3 [Source:HGNC Symbol;Acc:24717]
ENSG00000132305	-0.622191	8.61159	-6.2513	0.000122881	0.00282242	1.30932	1	-0.551029	8.61159	-5.53633	0.000308285	0.00413953	0.237605	0	1	IMMT	2	inner membrane protein, mitochondrial [Source:HGNC Symbol;Acc:6047]
ENSG00000132313	-0.618882	6.26418	-5.18444	0.000497494	0.00696689	-0.154667	1	-0.323514	6.26418	-2.71011	0.0230657	0.0977973	-4.23489	0	1	MRPL35	2	mitochondrial ribosomal protein L35 [Source:HGNC Symbol;Acc:14489]
ENSG00000132334	0.320158	8.57235	2.75001	0.0215776	0.0917528	-4.03893	0	1.0364	8.57235	8.90218	6.87284e-06	0.000297491	4.23793	1	1	PTPRE	10	protein tyrosine phosphatase, receptor type, E [Source:HGNC Symbol;Acc:9669]
ENSG00000132376	0.965548	6.55097	5.4133	0.000363709	0.00579861	0.173202	1	1.66595	6.55097	9.34008	4.55994e-06	0.000229521	4.66506	1	2	INPP5K	17	inositol polyphosphate-5-phosphatase K [Source:HGNC Symbol;Acc:33882]
ENSG00000132386	-1.77574	7.63161	-6.43977	9.7511e-05	0.00244013	1.55122	1	-2.32961	7.63161	-8.44842	1.07002e-05	0.000402788	3.77556	1	2	SERPINF1	17	serpin peptidase inhibitor, clade F (alpha-2 antiplasmin, pigment epithelium derived factor), member 1 [Source:HGNC Symbol;Acc:8824]
ENSG00000132388	-0.025577	8.04314	-0.24464	0.811981	0.908629	-7.04775	0	0.706283	8.04314	6.75548	6.6856e-05	0.00137433	1.85001	1	1	UBE2G1	17	ubiquitin-conjugating enzyme E2G 1 [Source:HGNC Symbol;Acc:12482]
ENSG00000132405	-0.622	6.45485	-3.92607	0.00318423	0.0246254	-2.08886	1	-0.344896	6.45485	-2.17699	0.0561455	0.183953	-5.1073	0	1	TBC1D14	4	TBC1 domain family, member 14 [Source:HGNC Symbol;Acc:29246]
ENSG00000132423	-0.593283	4.42819	-3.28415	0.00890573	0.0494616	-3.14584	1	-0.0554515	4.42819	-0.306955	0.765555	0.884089	-7.16515	0	1	COQ3	6	coenzyme Q3 homolog, methyltransferase (S. cerevisiae) [Source:HGNC Symbol;Acc:18175]
ENSG00000132429	1.27603	3.51945	4.6497	0.00106503	0.0114756	-0.950236	1	0.635762	3.51945	2.31665	0.0445201	0.156362	-4.88318	0	1	POPDC3	6	popeye domain containing 3 [Source:HGNC Symbol;Acc:17649]
ENSG00000132510	1.36281	4.02442	4.68018	0.00101869	0.0111467	-0.903801	1	0.326794	4.02442	1.12228	0.289533	0.527422	-6.56659	0	1	KDM6B	17	lysine (K)-specific demethylase 6B [Source:HGNC Symbol;Acc:29012]
ENSG00000132514	-2.62729	7.82215	-5.55304	0.000301488	0.00511687	0.369659	1	-1.36935	7.82215	-2.89426	0.0169626	0.0781142	-3.92664	0	1	CLEC10A	17	C-type lectin domain family 10, member A [Source:HGNC Symbol;Acc:16916]
ENSG00000132570	-0.600444	4.80088	-2.53402	0.0309659	0.11867	-4.39702	0	-0.788334	4.80088	-3.32696	0.00830367	0.0458094	-3.2006	1	1	PCBD2	5	pterin-4 alpha-carbinolamine dehydratase/dimerization cofactor of hepatocyte nuclear factor 1 alpha (TCF1) 2 [Source:HGNC Symbol;Acc:24474]
ENSG00000132600	-0.881935	6.48933	-5.50299	0.000322342	0.00538266	0.299622	1	-0.533287	6.48933	-3.32754	0.00829585	0.0458001	-3.19963	0	1	PRMT7	16	protein arginine methyltransferase 7 [Source:HGNC Symbol;Acc:25557]
ENSG00000132635	-0.161142	7.75924	-0.973002	0.354874	0.583721	-6.58521	0	-0.723876	7.75924	-4.37087	0.00161008	0.0137028	-1.49994	1	1	FAM113A	20	family with sequence similarity 113, member A [Source:HGNC Symbol;Acc:16212]
ENSG00000132718	-0.161686	4.83791	-0.856156	0.413159	0.638812	-6.69292	0	1.81928	4.83791	9.63343	3.49462e-06	0.000201192	4.94127	1	1	SYT11	1	synaptotagmin XI [Source:HGNC Symbol;Acc:19239]
ENSG00000132768	-0.750103	4.70079	-4.43027	0.00147302	0.0143768	-1.28836	1	-0.158221	4.70079	-0.934489	0.373386	0.611902	-6.75738	0	1	DPH2	1	DPH2 homolog (S. cerevisiae) [Source:HGNC Symbol;Acc:3004]
ENSG00000132823	0.826604	8.17092	5.57804	0.000291621	0.00500516	0.404501	1	0.553185	8.17092	3.73297	0.00431664	0.0282385	-2.52671	0	1	C20orf111	20	chromosome 20 open reading frame 111 [Source:HGNC Symbol;Acc:16105]
ENSG00000132846	-0.915794	5.02555	-5.01033	0.000634527	0.00820137	-0.409184	1	-1.21473	5.02555	-6.64582	7.61154e-05	0.00152378	1.71324	1	2	ZBED3	5	zinc finger, BED-type containing 3 [Source:HGNC Symbol;Acc:20711]
ENSG00000132952	-1.06334	7.54493	-6.01017	0.000166298	0.00347872	0.992641	1	-1.13882	7.54493	-6.43682	9.7862e-05	0.00182245	1.44817	1	2	USPL1	13	ubiquitin specific peptidase like 1 [Source:HGNC Symbol;Acc:20294]
ENSG00000132965	0.592613	9.7109	1.15845	0.275205	0.502674	-6.39176	0	3.73348	9.7109	7.29827	3.5924e-05	0.000900247	2.50436	1	1	ALOX5AP	13	arachidonate 5-lipoxygenase-activating protein [Source:HGNC Symbol;Acc:436]
ENSG00000133027	-0.259536	5.35371	-1.6587	0.130043	0.314318	-5.75603	0	-1.19317	5.35371	-7.62559	2.50993e-05	0.000702981	2.88147	1	1	PEMT	17	phosphatidylethanolamine N-methyltransferase [Source:HGNC Symbol;Acc:8830]
ENSG00000133056	-1.08941	4.83003	-5.12405	0.00054103	0.00733744	-0.242445	1	-1.6452	4.83003	-7.73821	2.22449e-05	0.000645615	3.00832	1	2	PIK3C2B	1	phosphoinositide-3-kinase, class 2, beta polypeptide [Source:HGNC Symbol;Acc:8972]
ENSG00000133065	1.27165	5.29758	5.21147	0.000479237	0.00678456	-0.115541	1	0.419648	5.29758	1.7198	0.11808	0.303508	-5.80271	0	1	SLC41A1	1	solute carrier family 41, member 1 [Source:HGNC Symbol;Acc:19429]
ENSG00000133101	1.65053	4.91993	4.90114	0.000740782	0.00907664	-0.571054	1	2.45292	4.91993	7.28379	3.65081e-05	0.000908423	2.48738	1	2	CCNA1	13	cyclin A1 [Source:HGNC Symbol;Acc:1577]
ENSG00000133111	-1.00374	5.11721	-8.10464	1.5155e-05	0.00079697	3.48962	1	-0.445969	5.11721	-3.60093	0.00532917	0.032838	-2.74453	0	1	RFXAP	13	regulatory factor X-associated protein [Source:HGNC Symbol;Acc:9988]
ENSG00000133121	0.658191	5.68103	4.99542	0.000648025	0.00831482	-0.431194	1	-0.119855	5.68103	-0.909655	0.385688	0.621595	-6.78048	0	1	STARD13	13	StAR-related lipid transfer (START) domain containing 13 [Source:HGNC Symbol;Acc:19164]
ENSG00000133142	-0.233869	9.19413	-1.80126	0.103694	0.271075	-5.55095	0	-0.646082	9.19413	-4.97612	0.000665943	0.00714461	-0.573622	1	1	TCEAL4	X	transcription elongation factor A (SII)-like 4 [Source:HGNC Symbol;Acc:26121]
ENSG00000133216	-2.04609	5.58531	-11.8493	5.69823e-07	0.000112793	6.82103	1	-1.35411	5.58531	-7.8419	1.9928e-05	0.000604081	3.12382	1	2	EPHB2	1	EPH receptor B2 [Source:HGNC Symbol;Acc:3393]
ENSG00000133302	-0.594835	5.13995	-3.71412	0.0044479	0.031107	-2.43402	1	-0.274137	5.13995	-1.7117	0.119606	0.306219	-5.81434	0	1	ANKRD32	5	ankyrin repeat domain 32 [Source:HGNC Symbol;Acc:25408]
ENSG00000133313	-0.61075	7.75252	-5.18094	0.000499908	0.00697851	-0.159733	1	-0.0640454	7.75252	-0.543291	0.599548	0.78553	-7.05684	0	1	CNDP2	18	CNDP dipeptidase 2 (metallopeptidase M20 family) [Source:HGNC Symbol;Acc:24437]
ENSG00000133316	-0.995371	4.80185	-3.69938	0.00455347	0.031512	-2.45819	1	-0.440386	4.80185	-1.63673	0.134606	0.329508	-5.92059	0	1	WDR74	11	WD repeat domain 74 [Source:HGNC Symbol;Acc:25529]
ENSG00000133318	0.584189	7.40803	3.01926	0.0137808	0.067244	-3.58885	0	0.973812	7.40803	5.03294	0.000614642	0.00672786	-0.489287	1	1	RTN3	11	reticulon 3 [Source:HGNC Symbol;Acc:10469]
ENSG00000133321	-0.750377	5.53553	-3.70917	0.00448308	0.0312291	-2.44214	1	-1.48324	5.53553	-7.33177	3.4611e-05	0.000872307	2.54354	1	2	RARRES3	11	retinoic acid receptor responder (tazarotene induced) 3 [Source:HGNC Symbol;Acc:9869]
ENSG00000133392	1.64059	5.29735	5.34039	0.000401548	0.00619084	0.0695851	1	1.54644	5.29735	5.03392	0.000613798	0.00672786	-0.487842	1	2	MYH11	16	myosin, heavy chain 11, smooth muscle [Source:HGNC Symbol;Acc:7569]
ENSG00000133422	-0.0308412	7.61402	-0.187542	0.855214	0.930041	-7.06124	0	0.936229	7.61402	5.69311	0.000250486	0.00355013	0.45657	1	1	MORC2	22	MORC family CW-type zinc finger 2 [Source:HGNC Symbol;Acc:23573]
ENSG00000133574	-1.49918	8.23256	-7.02936	4.86606e-05	0.00158457	2.27721	1	-1.00491	8.23256	-4.7118	0.000972865	0.00943501	-0.971938	1	2	GIMAP4	7	GTPase, IMAP family member 4 [Source:HGNC Symbol;Acc:21872]
ENSG00000133624	0.426102	5.20319	3.34832	0.00801922	0.0458833	-3.03886	0	0.656044	5.20319	5.15522	0.000518071	0.00593038	-0.309376	1	1	ZNF767	7	zinc finger family member 767 [Source:HGNC Symbol;Acc:21884]
ENSG00000133641	-0.585503	6.8584	-4.52582	0.00127794	0.0130742	-1.14032	1	-0.6462	6.8584	-4.99499	0.000648413	0.00700803	-0.545561	1	2	C12orf29	12	chromosome 12 open reading frame 29 [Source:HGNC Symbol;Acc:25322]
ENSG00000133657	0.470516	11.3337	3.51086	0.00616023	0.038525	-2.76891	0	1.23984	11.3337	9.25136	4.9488e-06	0.000242051	4.57998	1	1	ATP13A3	3	ATPase type 13A3 [Source:HGNC Symbol;Acc:24113]
ENSG00000133706	-0.510861	7.46354	-3.70599	0.00450583	0.0313339	-2.44735	0	-0.615589	7.46354	-4.46572	0.00139717	0.012375	-1.35148	1	1	LARS	5	leucyl-tRNA synthetase [Source:HGNC Symbol;Acc:6512]
ENSG00000133731	0.440105	8.97251	3.72855	0.00434705	0.0306696	-2.41038	0	0.690242	8.97251	5.8477	0.000204789	0.00308621	0.669054	1	1	IMPA1	8	inositol(myo)-1(or 4)-monophosphatase 1 [Source:HGNC Symbol;Acc:6050]
ENSG00000133789	-0.642486	9.11688	-4.38249	0.00158223	0.0150008	-1.36284	1	-0.802342	9.11688	-5.47289	0.000335627	0.00437586	0.148014	1	2	SWAP70	11	SWAP switching B-cell complex 70kDa subunit [Source:HGNC Symbol;Acc:17070]
ENSG00000133805	0.988356	9.12902	6.97299	5.19111e-05	0.00165374	2.20976	1	1.27368	9.12902	8.98601	6.34576e-06	0.000284025	4.32111	1	2	AMPD3	11	adenosine monophosphate deaminase 3 [Source:HGNC Symbol;Acc:470]
ENSG00000133943	-1.38199	5.85866	-7.77919	2.1296e-05	0.000980076	3.13703	1	-1.75937	5.85866	-9.90345	2.75166e-06	0.000174606	5.18879	1	2	C14orf159	14	chromosome 14 open reading frame 159 [Source:HGNC Symbol;Acc:20498]
ENSG00000134014	-0.587791	6.89293	-6.46783	9.42478e-05	0.00237964	1.58681	1	-0.270547	6.89293	-2.977	0.0147821	0.07065	-3.78776	0	1	ELP3	8	elongation protein 3 homolog (S. cerevisiae) [Source:HGNC Symbol;Acc:20696]
ENSG00000134061	-2.64763	7.76451	-11.7061	6.3472e-07	0.000117704	6.71416	1	-2.29913	7.76451	-10.1653	2.19377e-06	0.000155499	5.42289	1	2	CD180	5	CD180 molecule [Source:HGNC Symbol;Acc:6726]
ENSG00000134070	1.7705	5.56068	9.59965	3.60213e-06	0.000330514	4.96649	1	1.62792	5.56068	8.8266	7.38936e-06	0.000315967	4.16235	1	2	IRAK2	3	interleukin-1 receptor-associated kinase 2 [Source:HGNC Symbol;Acc:6113]
ENSG00000134072	-1.03171	5.54605	-3.30516	0.00860478	0.0482541	-3.11079	1	-0.0247492	5.54605	-0.0792861	0.938464	0.972124	-7.21327	0	1	CAMK1	3	calcium/calmodulin-dependent protein kinase I [Source:HGNC Symbol;Acc:1459]
ENSG00000134107	1.99203	6.17547	9.00147	6.25348e-06	0.000487467	4.40215	1	0.626758	6.17547	2.83216	0.0188124	0.0843987	-4.03078	0	1	BHLHE40	3	basic helix-loop-helix family, member e40 [Source:HGNC Symbol;Acc:1046]
ENSG00000134153	0.331975	9.92305	2.82945	0.0188973	0.0837521	-3.90638	0	0.863768	9.92305	7.36198	3.34716e-05	0.000855832	2.57877	1	1	C15orf24	15	chromosome 15 open reading frame 24 [Source:HGNC Symbol;Acc:24301]
ENSG00000134186	-0.725292	8.17868	-5.45942	0.000341765	0.00558004	0.23836	1	-0.687964	8.17868	-5.17845	0.000501639	0.00581024	-0.275438	1	2	PRPF38B	1	PRP38 pre-mRNA processing factor 38 (yeast) domain containing B [Source:HGNC Symbol;Acc:25512]
ENSG00000134202	1.22738	4.18891	8.80995	7.50871e-06	0.000535075	4.21422	1	0.958218	4.18891	6.87795	5.79393e-05	0.00124782	2.00091	1	2	GSTM3	1	glutathione S-transferase mu 3 (brain) [Source:HGNC Symbol;Acc:4635]
ENSG00000134215	-0.664545	5.7014	-4.55176	0.00122985	0.0126754	-1.10033	1	0.130293	5.7014	0.892436	0.394385	0.629788	-6.79619	0	1	VAV3	1	vav 3 guanine nucleotide exchange factor [Source:HGNC Symbol;Acc:12659]
ENSG00000134243	0.0370068	5.84903	0.196236	0.848594	0.926348	-7.05941	0	0.990603	5.84903	5.25287	0.000452658	0.00538887	-0.167228	1	1	SORT1	1	sortilin 1 [Source:HGNC Symbol;Acc:11186]
ENSG00000134247	-1.28169	6.81113	-3.83188	0.00369148	0.0273707	-2.24168	1	-0.791135	6.81113	-2.36526	0.0410546	0.147969	-4.80426	0	1	PTGFRN	1	prostaglandin F2 receptor negative regulator [Source:HGNC Symbol;Acc:9601]
ENSG00000134262	-0.806385	5.41613	-6.95087	5.32508e-05	0.00168122	2.18318	1	0.00994392	5.41613	0.0857145	0.933488	0.970221	-7.21269	0	1	AP4B1	1	adaptor-related protein complex 4, beta 1 subunit [Source:HGNC Symbol;Acc:572]
ENSG00000134278	0.83713	6.66156	7.02489	4.89099e-05	0.001588	2.27188	1	0.808073	6.66156	6.78105	6.48778e-05	0.00134307	1.88168	1	2	SPIRE1	18	spire homolog 1 (Drosophila) [Source:HGNC Symbol;Acc:30622]
ENSG00000134294	0.756868	4.97542	5.20996	0.000480237	0.00678456	-0.117723	1	1.40788	4.97542	9.69123	3.31877e-06	0.000198351	4.99479	1	2	SLC38A2	12	solute carrier family 38, member 2 [Source:HGNC Symbol;Acc:13448]
ENSG00000134317	1.61413	4.88439	5.06087	0.000590997	0.00782857	-0.334854	1	1.78093	4.88439	5.58385	0.000289376	0.00394271	0.304355	1	2	GRHL1	2	grainyhead-like 1 (Drosophila) [Source:HGNC Symbol;Acc:17923]
ENSG00000134330	-0.191123	6.29374	-1.42625	0.186084	0.396642	-6.06966	0	-0.60819	6.29374	-4.53861	0.00125399	0.0114109	-1.23821	1	1	IAH1	2	isoamyl acetate-hydrolyzing esterase 1 homolog (S. cerevisiae) [Source:HGNC Symbol;Acc:27696]
ENSG00000134333	0.809818	11.1484	4.3324	0.00170605	0.0157606	-1.44125	1	0.964169	11.1484	5.15815	0.000515963	0.00593032	-0.305084	1	2	LDHA	11	lactate dehydrogenase A [Source:HGNC Symbol;Acc:6535]
ENSG00000134419	-0.310872	8.88987	-2.57151	0.0290837	0.113784	-4.33519	0	-0.595069	8.88987	-4.92237	0.000718713	0.00755013	-0.653819	1	1	RPS15A	16	ribosomal protein S15a [Source:HGNC Symbol;Acc:10389]
ENSG00000134440	-0.734293	9.81915	-5.95668	0.000178027	0.00364686	0.921288	1	-0.42103	9.81915	-3.41545	0.00718923	0.0411745	-3.05278	0	1	NARS	18	asparaginyl-tRNA synthetase [Source:HGNC Symbol;Acc:7643]
ENSG00000134460	2.72265	6.97454	7.07523	4.6179e-05	0.00154584	2.33179	1	2.77083	6.97454	7.20043	4.00799e-05	0.000972572	2.38912	1	2	IL2RA	10	interleukin 2 receptor, alpha [Source:HGNC Symbol;Acc:6008]
ENSG00000134463	-0.673763	7.52902	-3.35156	0.00797705	0.045746	-3.03348	1	-0.855204	7.52902	-4.25411	0.00192058	0.0155778	-1.68428	1	2	ECHDC3	10	enoyl CoA hydratase domain containing 3 [Source:HGNC Symbol;Acc:23489]
ENSG00000134470	1.48767	6.25997	4.48951	0.00134861	0.013553	-1.19643	1	0.803566	6.25997	2.42501	0.0371567	0.138216	-4.70671	0	1	IL15RA	10	interleukin 15 receptor, alpha [Source:HGNC Symbol;Acc:5978]
ENSG00000134504	0.240543	3.73321	0.769368	0.46053	0.679096	-6.76528	0	1.08698	3.73321	3.47667	0.00651013	0.0383682	-2.95079	1	1	KCTD1	18	potassium channel tetramerisation domain containing 1 [Source:HGNC Symbol;Acc:18249]
ENSG00000134516	-1.11591	6.99443	-9.46619	4.06369e-06	0.00035795	4.84346	1	-0.839826	6.99443	-7.12416	4.36827e-05	0.00102608	2.29848	1	2	DOCK2	5	dedicator of cytokinesis 2 [Source:HGNC Symbol;Acc:2988]
ENSG00000134571	0.492032	4.86716	3.14496	0.0111943	0.0577819	-3.37844	0	1.0155	4.86716	6.49087	9.16567e-05	0.00174564	1.51728	1	1	MYBPC3	11	myosin binding protein C, cardiac [Source:HGNC Symbol;Acc:7551]
ENSG00000134574	-0.794462	7.49061	-3.65306	0.00490259	0.0330583	-2.53426	1	0.0182227	7.49061	0.0837909	0.934976	0.970806	-7.21286	0	1	DDB2	11	damage-specific DNA binding protein 2, 48kDa [Source:HGNC Symbol;Acc:2718]
ENSG00000134575	-0.445748	5.83206	-3.48528	0.00642012	0.039602	-2.81129	0	0.900392	5.83206	7.04011	4.8066e-05	0.00109971	2.19776	1	1	ACP2	11	acid phosphatase 2, lysosomal [Source:HGNC Symbol;Acc:123]
ENSG00000134590	0.472328	10.6351	4.0022	0.00282801	0.0226682	-1.96603	0	1.11935	10.6351	9.48462	3.99623e-06	0.000213057	4.80212	1	1	FAM127A	X	family with sequence similarity 127, member A [Source:HGNC Symbol;Acc:2569]
ENSG00000134602	1.44513	5.79454	7.36513	3.33551e-05	0.00131458	2.67069	1	0.0374309	5.79454	0.190768	0.852756	0.934045	-7.19674	0	1		X	Serine/threonine-protein kinase MST4 [Source:UniProtKB/Swiss-Prot;Acc:Q9P289]
ENSG00000134686	0.979993	7.02739	5.85085	0.000203958	0.0039507	0.778912	1	1.05355	7.02739	6.29002	0.000117137	0.00207358	1.25849	1	2	PHC2	1	polyhomeotic homolog 2 (Drosophila) [Source:HGNC Symbol;Acc:3183]
ENSG00000134744	-0.526584	5.25822	-2.28112	0.0472329	0.159437	-4.80912	0	-0.778066	5.25822	-3.37052	0.00773434	0.0433384	-3.1278	1	1	ZCCHC11	1	zinc finger, CCHC domain containing 11 [Source:HGNC Symbol;Acc:28981]
ENSG00000134755	0.266501	6.08312	1.99203	0.0761264	0.220542	-5.26421	0	1.29071	6.08312	9.64778	3.45003e-06	0.000200745	4.95458	1	1	DSC2	18	desmocollin 2 [Source:HGNC Symbol;Acc:3036]
ENSG00000134758	-0.683155	7.67414	-5.073	0.00058103	0.00775292	-0.317062	1	-0.722013	7.67414	-5.36155	0.000390146	0.00490558	-0.0106431	1	2	RNF138	18	ring finger protein 138 [Source:HGNC Symbol;Acc:17765]
ENSG00000134759	-0.58863	7.58705	-3.7383	0.00428026	0.0303686	-2.39441	1	-0.846958	7.58705	-5.37891	0.000381056	0.00481914	0.0142015	1	2	ELP2	18	elongation protein 2 homolog (S. cerevisiae) [Source:HGNC Symbol;Acc:18248]
ENSG00000134769	0.770879	3.49534	6.26573	0.000120706	0.00278698	1.32801	1	-0.182055	3.49534	-1.47975	0.171587	0.383823	-6.13422	0	1	DTNA	18	dystrobrevin, alpha [Source:HGNC Symbol;Acc:3057]
ENSG00000134780	-0.453231	4.11331	-2.61124	0.0272132	0.108391	-4.26949	0	-0.617918	4.11331	-3.56007	0.00569067	0.0345414	-2.81223	1	1	DAGLA	11	diacylglycerol lipase, alpha [Source:HGNC Symbol;Acc:1165]
ENSG00000134830	-0.0464389	3.71782	-0.269593	0.793287	0.896774	-7.04076	0	0.588122	3.71782	3.41423	0.00720346	0.041189	-3.05481	1	1	GPR77	19	G protein-coupled receptor 77 [Source:HGNC Symbol;Acc:4527]
ENSG00000134853	1.3699	3.73337	6.81636	6.22503e-05	0.00179251	2.0202	1	0.358043	3.73337	1.78156	0.107017	0.284392	-5.71311	0	1	PDGFRA	4	platelet-derived growth factor receptor, alpha polypeptide [Source:HGNC Symbol;Acc:8803]
ENSG00000134905	-0.664229	6.47378	-4.07863	0.00251243	0.0208065	-1.84338	1	-0.0236328	6.47378	-0.145115	0.887678	0.948909	-7.20515	0	1	CARS2	13	cysteinyl-tRNA synthetase 2, mitochondrial (putative) [Source:HGNC Symbol;Acc:25695]
ENSG00000134909	0.627375	4.30991	3.5578	0.00571143	0.0366018	-2.69127	1	1.12764	4.30991	6.39477	0.000103005	0.00188045	1.39414	1	2	ARHGAP32	11	Rho GTPase activating protein 32 [Source:HGNC Symbol;Acc:17399]
ENSG00000134954	2.51139	5.22072	5.44632	0.00034785	0.00563761	0.21988	1	0.815165	5.22072	1.7678	0.109395	0.288722	-5.7332	0	1	ETS1	11	v-ets erythroblastosis virus E26 oncogene homolog 1 (avian) [Source:HGNC Symbol;Acc:3488]
ENSG00000134955	-0.934653	4.79271	-7.18648	4.07138e-05	0.00145193	2.46308	1	-0.99748	4.79271	-7.66955	2.39401e-05	0.000679151	2.93117	1	2	SLC37A2	11	solute carrier family 37 (glycerol-3-phosphate transporter), member 2 [Source:HGNC Symbol;Acc:20644]
ENSG00000134986	0.942682	4.46622	2.8507	0.0182395	0.0815546	-3.87089	0	1.27897	4.46622	3.86763	0.00348959	0.0241937	-2.30622	1	1	C5orf13	5	chromosome 5 open reading frame 13 [Source:HGNC Symbol;Acc:16834]
ENSG00000134987	-0.987064	6.76315	-5.46174	0.000340701	0.00558004	0.241624	1	-0.753587	6.76315	-4.16984	0.00218389	0.0170498	-1.81841	1	2	WDR36	5	WD repeat domain 36 [Source:HGNC Symbol;Acc:30696]
ENSG00000135002	-0.920517	8.12894	-6.72273	6.94864e-05	0.0019406	1.90536	1	-0.137181	8.12894	-1.00186	0.34145	0.58136	-6.69215	0	1	RFK	9	riboflavin kinase [Source:HGNC Symbol;Acc:30324]
ENSG00000135046	0.644488	10.9185	4.39885	0.0015439	0.014774	-1.3373	1	0.157788	10.9185	1.07696	0.308306	0.548297	-6.61516	0	1	ANXA1	9	annexin A1 [Source:HGNC Symbol;Acc:533]
ENSG00000135048	1.06165	7.77174	4.81102	0.000842836	0.00978145	-0.705922	1	0.0747169	7.77174	0.338591	0.742343	0.871213	-7.15404	0	1	TMEM2	9	transmembrane protein 2 [Source:HGNC Symbol;Acc:11869]
ENSG00000135052	1.02074	4.76406	5.32173	0.000411903	0.0062475	0.0429328	1	1.61918	4.76406	8.4417	1.0772e-05	0.000404627	3.76856	1	2	GOLM1	9	golgi membrane protein 1 [Source:HGNC Symbol;Acc:15451]
ENSG00000135063	0.436082	3.93841	1.80759	0.102646	0.269656	-5.54165	0	1.50921	3.93841	6.25576	0.000122204	0.00212389	1.21381	1	1	FAM189A2	9	family with sequence similarity 189, member A2 [Source:HGNC Symbol;Acc:24820]
ENSG00000135077	-0.845983	6.44106	-5.90816	0.000189444	0.00378072	0.856209	1	-0.84668	6.44106	-5.91302	0.000188264	0.00290171	0.757822	1	2	HAVCR2	5	hepatitis A virus cellular receptor 2 [Source:HGNC Symbol;Acc:18437]
ENSG00000135108	-0.00146249	7.1717	-0.00676432	0.994744	0.997373	-7.0805	0	1.28962	7.1717	5.96477	0.000176198	0.00276164	0.827711	1	1	FBXO21	12	F-box protein 21 [Source:HGNC Symbol;Acc:13592]
ENSG00000135148	-0.717203	6.91057	-5.96847	0.000175368	0.00360497	0.937043	1	-0.101322	6.91057	-0.843185	0.420019	0.651936	-6.83972	0	1	TRAFD1	12	TRAF-type zinc finger domain containing 1 [Source:HGNC Symbol;Acc:24808]
ENSG00000135185	-0.913559	8.19832	-6.33839	0.000110366	0.00264595	1.42169	1	-1.23313	8.19832	-8.55562	9.62147e-06	0.000378352	3.88668	1	2	C7orf23	7	chromosome 7 open reading frame 23 [Source:HGNC Symbol;Acc:21707]
ENSG00000135205	-0.870246	5.08996	-6.02634	0.000162919	0.00343319	1.01413	1	-0.534965	5.08996	-3.70456	0.00451607	0.0290895	-2.57345	0	1	CCDC146	7	coiled-coil domain containing 146 [Source:HGNC Symbol;Acc:29296]
ENSG00000135218	-1.72721	9.13286	-7.00265	5.0172e-05	0.00161292	2.2453	1	-0.971029	9.13286	-3.93686	0.00313099	0.0223134	-2.19358	1	2	CD36	7	CD36 molecule (thrombospondin receptor) [Source:HGNC Symbol;Acc:1663]
ENSG00000135241	0.907678	8.59256	9.24047	4.99897e-06	0.000423398	4.63166	1	0.0857259	8.59256	0.872719	0.404513	0.638157	-6.81387	0	1	PNPLA8	7	patatin-like phospholipase domain containing 8 [Source:HGNC Symbol;Acc:28900]
ENSG00000135297	-1.11326	7.13351	-7.49699	2.88564e-05	0.00118776	2.82142	1	-0.769374	7.13351	-5.18117	0.000499751	0.00579981	-0.271466	1	2	MTO1	6	mitochondrial translation optimization 1 homolog (S. cerevisiae) [Source:HGNC Symbol;Acc:19261]
ENSG00000135299	-0.157071	4.30189	-0.865943	0.408035	0.633614	-6.68435	0	-0.779995	4.30189	-4.30016	0.00179114	0.0147727	-1.61138	1	1	ANKRD6	6	ankyrin repeat domain 6 [Source:HGNC Symbol;Acc:17280]
ENSG00000135318	1.61496	4.18712	6.70974	7.05603e-05	0.00196066	1.88933	1	1.31176	4.18712	5.45002	0.000346116	0.00447033	0.11557	1	2	NT5E	6	5'-nucleotidase, ecto (CD73) [Source:HGNC Symbol;Acc:8021]
ENSG00000135363	-0.925234	8.31313	-4.48464	0.0013584	0.0136126	-1.20396	1	-0.663961	8.31313	-3.21824	0.00992232	0.052483	-3.3827	0	1	LMO2	11	LIM domain only 2 (rhombotin-like 1) [Source:HGNC Symbol;Acc:6642]
ENSG00000135365	0.451019	5.96825	2.72073	0.0226596	0.0950001	-4.08769	0	1.15895	5.96825	6.99127	5.08319e-05	0.00114642	2.13882	1	1	PHF21A	11	PHD finger protein 21A [Source:HGNC Symbol;Acc:24156]
ENSG00000135372	-0.734442	6.36443	-4.47768	0.00137253	0.013711	-1.21475	1	-0.346836	6.36443	-2.11455	0.0622485	0.196917	-5.20605	0	1	NAT10	11	N-acetyltransferase 10 (GCN5-related) [Source:HGNC Symbol;Acc:29830]
ENSG00000135378	0.972238	6.39642	4.5604	0.00121428	0.0125536	-1.08704	1	1.62153	6.39642	7.606	2.56354e-05	0.000713459	2.85926	1	2	PRRG4	11	proline rich Gla (G-carboxyglutamic acid) 4 (transmembrane) [Source:HGNC Symbol;Acc:30799]
ENSG00000135390	-0.326669	10.7435	-2.66925	0.0246964	0.101063	-4.17329	0	-0.717769	10.7435	-5.86498	0.00020027	0.00303628	0.692598	1	1	ATP5G2	12	ATP synthase, H+ transporting, mitochondrial Fo complex, subunit C2 (subunit 9) [Source:HGNC Symbol;Acc:842]
ENSG00000135407	0.882299	4.821	4.23451	0.00197869	0.0175787	-1.59542	1	0.343083	4.821	1.64659	0.132541	0.326569	-5.90677	0	1	AVIL	12	advillin [Source:HGNC Symbol;Acc:14188]
ENSG00000135446	-0.592521	7.35409	-3.30189	0.008651	0.0483825	-3.11626	1	-1.21885	7.35409	-6.79216	6.40386e-05	0.00133353	1.8954	1	2	CDK4	12	cyclin-dependent kinase 4 [Source:HGNC Symbol;Acc:1773]
ENSG00000135457	-0.836812	6.71107	-6.15893	0.000137858	0.00304341	1.18897	1	-0.16965	6.71107	-1.24862	0.241943	0.47325	-6.42335	0	1	TFCP2	12	transcription factor CP2 [Source:HGNC Symbol;Acc:11748]
ENSG00000135469	2.08294	7.61593	8.68944	8.43864e-06	0.000569592	4.09408	1	3.28512	7.61593	13.7046	1.55067e-07	3.10433e-05	8.10809	1	2	COQ10A	12	coenzyme Q10 homolog A (S. cerevisiae) [Source:HGNC Symbol;Acc:26515]
ENSG00000135521	-1.08749	5.84781	-7.74874	2.19968e-05	0.000998756	3.10343	1	-0.280199	5.84781	-1.9965	0.0755719	0.224852	-5.38991	0	1	LTV1	6	LTV1 homolog (S. cerevisiae) [Source:HGNC Symbol;Acc:21173]
ENSG00000135596	-0.578537	9.17428	-4.31845	0.00174233	0.0159876	-1.46315	0	-1.33576	9.17428	-9.97069	2.59487e-06	0.00016931	5.24946	1	1	MICAL1	6	microtubule associated monoxygenase, calponin and LIM domain containing 1 [Source:HGNC Symbol;Acc:20619]
ENSG00000135604	0.721448	6.91977	5.05718	0.000594064	0.0078453	-0.340268	1	1.1056	6.91977	7.74999	2.19676e-05	0.000641796	3.0215	1	2	STX11	6	syntaxin 11 [Source:HGNC Symbol;Acc:11429]
ENSG00000135605	-0.868144	4.39908	-4.29261	0.00181172	0.0164947	-1.50377	1	0.0326455	4.39908	0.161418	0.875173	0.943108	-7.20241	0	1	TEC	4	tec protein tyrosine kinase [Source:HGNC Symbol;Acc:11719]
ENSG00000135617	-0.802247	6.12984	-3.39169	0.00747231	0.0438041	-2.96668	1	-0.165528	6.12984	-0.69981	0.500962	0.714379	-6.9541	0	1	PRADC1	2	protease-associated domain containing 1 [Source:HGNC Symbol;Acc:16047]
ENSG00000135637	-0.700066	5.07365	-3.65217	0.00490951	0.033077	-2.53572	1	-0.303132	5.07365	-1.58141	0.146739	0.347928	-5.99731	0	1	CCDC142	2	coiled-coil domain containing 142 [Source:HGNC Symbol;Acc:25889]
ENSG00000135643	-0.921443	5.50605	-1.9336	0.0837371	0.235166	-5.35337	0	-1.88527	5.50605	-3.95613	0.00303824	0.0218272	-2.16232	1	1	KCNMB4	12	potassium large conductance calcium-activated channel, subfamily M, beta member 4 [Source:HGNC Symbol;Acc:6289]
ENSG00000135678	0.34253	7.5243	1.4894	0.169079	0.373267	-5.98728	0	-1.32021	7.5243	-5.74061	0.000235372	0.00340439	0.522218	1	1	CPM	12	carboxypeptidase M [Source:HGNC Symbol;Acc:2311]
ENSG00000135686	0.215703	6.77058	1.89136	0.089679	0.246355	-5.41712	0	-0.684923	6.77058	-6.00565	0.000167257	0.00266657	0.882663	1	1	KLHL36	16	kelch-like 36 (Drosophila) [Source:HGNC Symbol;Acc:17844]
ENSG00000135709	-0.752458	5.97601	-6.00328	0.000167761	0.0034893	0.983473	1	-0.402177	5.97601	-3.20866	0.0100798	0.0531028	-3.39877	0	1	KIAA0513	16	KIAA0513 [Source:HGNC Symbol;Acc:29058]
ENSG00000135723	0.420587	5.69132	2.34606	0.0423906	0.147734	-4.7043	0	0.608696	5.69132	3.39534	0.00742815	0.0420777	-3.08635	1	1	FHOD1	16	formin homology 2 domain containing 1 [Source:HGNC Symbol;Acc:17905]
ENSG00000135740	0.60028	4.16525	3.78646	0.00396582	0.0287976	-2.3157	1	1.02006	4.16525	6.43437	9.81534e-05	0.00182273	1.44504	1	2	SLC9A5	16	solute carrier family 9 (sodium/hydrogen exchanger), member 5 [Source:HGNC Symbol;Acc:11078]
ENSG00000135766	2.51264	7.32972	13.0133	2.46931e-07	7.3397e-05	7.64145	1	0.565984	7.32972	2.9313	0.0159484	0.074784	-3.86448	0	1	EGLN1	1	egl nine homolog 1 (C. elegans) [Source:HGNC Symbol;Acc:1232]
ENSG00000135775	-0.887349	6.9849	-6.78051	6.49192e-05	0.00183871	1.97636	1	-0.359272	6.9849	-2.74531	0.0217476	0.0935141	-4.1761	0	1	COG2	1	component of oligomeric golgi complex 2 [Source:HGNC Symbol;Acc:6546]
ENSG00000135778	-0.406695	6.93437	-2.33718	0.0430224	0.149228	-4.71867	0	-0.745528	6.93437	-4.28438	0.00183442	0.015022	-1.63633	1	1	NTPCR	1	nucleoside-triphosphatase, cancer-related [Source:HGNC Symbol;Acc:28204]
ENSG00000135821	-0.634102	7.54468	-3.41948	0.00714241	0.0423093	-2.92049	1	0.0190782	7.54468	0.102881	0.920214	0.964219	-7.21091	0	1	GLUL	1	glutamate-ammonia ligase [Source:HGNC Symbol;Acc:4341]
ENSG00000135842	1.01699	8.2787	8.74934	7.96155e-06	0.000548724	4.15398	1	1.10246	8.2787	9.48469	3.99597e-06	0.000213057	4.80219	1	2	FAM129A	1	family with sequence similarity 129, member A [Source:HGNC Symbol;Acc:16784]
ENSG00000135847	-0.496153	7.06487	-4.27981	0.00184715	0.0167222	-1.52391	0	-0.70141	7.06487	-6.05036	0.000158035	0.00255892	0.942504	1	1	ACBD6	1	acyl-CoA binding domain containing 6 [Source:HGNC Symbol;Acc:23339]
ENSG00000135862	0.697952	5.86168	3.67751	0.00471489	0.0322447	-2.49407	1	1.07654	5.86168	5.67231	0.00025743	0.00363102	0.427726	1	2	LAMC1	1	laminin, gamma 1 (formerly LAMB2) [Source:HGNC Symbol;Acc:6492]
ENSG00000135899	-1.88667	6.80329	-3.92609	0.00318413	0.0246254	-2.08883	1	-0.712611	6.80329	-1.48292	0.170761	0.382638	-6.13004	0	1	SP110	2	SP110 nuclear body protein [Source:HGNC Symbol;Acc:5401]
ENSG00000135912	0.569501	5.90855	2.7354	0.022111	0.0934866	-4.06328	0	0.750809	5.90855	3.60625	0.00528394	0.0326278	-2.73573	1	1	TTLL4	2	tubulin tyrosine ligase-like family, member 4 [Source:HGNC Symbol;Acc:28976]
ENSG00000135914	-2.85557	7.63893	-6.94055	5.38881e-05	0.00168623	2.17076	1	-3.61341	7.63893	-8.78252	7.71008e-06	0.000326511	4.11801	1	2	HTR2B	2	5-hydroxytryptamine (serotonin) receptor 2B [Source:HGNC Symbol;Acc:5294]
ENSG00000135919	4.18969	4.55012	15.9893	3.83297e-08	2.48272e-05	9.40751	1	0.0494128	4.55012	0.188576	0.854425	0.934477	-7.1972	0	1	SERPINE2	2	serpin peptidase inhibitor, clade E (nexin, plasminogen activator inhibitor type 1), member 2 [Source:HGNC Symbol;Acc:8951]
ENSG00000135931	-1.26527	7.79301	-5.70703	0.000245948	0.00451811	0.582875	1	-2.0176	7.79301	-9.10043	5.69648e-06	0.000265489	4.43355	1	2	ARMC9	2	armadillo repeat containing 9 [Source:HGNC Symbol;Acc:20730]
ENSG00000135932	-0.0594105	7.72761	-0.496869	0.630671	0.799575	-6.94668	0	0.735468	7.72761	6.15094	0.000139243	0.00234517	1.07608	1	1	CAB39	2	calcium binding protein 39 [Source:HGNC Symbol;Acc:20292]
ENSG00000135966	-1.24151	6.35489	-5.09361	0.000564512	0.00758582	-0.286893	1	-1.03248	6.35489	-4.23603	0.00197411	0.015873	-1.71299	1	2	TGFBRAP1	2	transforming growth factor, beta receptor associated protein 1 [Source:HGNC Symbol;Acc:16836]
ENSG00000135972	-0.882744	7.63336	-5.19236	0.000492064	0.00690182	-0.143182	1	-0.70363	7.63336	-4.1388	0.00229026	0.0176963	-1.86802	1	2	MRPS9	2	mitochondrial ribosomal protein S9 [Source:HGNC Symbol;Acc:14501]
ENSG00000136003	-0.891667	10.473	-7.87479	1.92494e-05	0.000911603	3.24185	1	0.0542816	10.473	0.47939	0.642595	0.814053	-7.09182	0	1	ISCU	12	iron-sulfur cluster scaffold homolog (E. coli) [Source:HGNC Symbol;Acc:29882]
ENSG00000136026	0.924985	8.54768	5.33918	0.000402209	0.00619084	0.0678631	1	1.16496	8.54768	6.72439	6.93504e-05	0.00141734	1.81139	1	2	CKAP4	12	cytoskeleton-associated protein 4 [Source:HGNC Symbol;Acc:16991]
ENSG00000136040	0.0969831	7.65141	0.675818	0.515403	0.721751	-6.8356	0	-0.744431	7.65141	-5.1875	0.000495386	0.00576054	-0.26223	1	1	PLXNC1	12	plexin C1 [Source:HGNC Symbol;Acc:9106]
ENSG00000136044	-0.882973	6.57132	-3.60781	0.00527076	0.0346345	-2.60876	1	-1.18359	6.57132	-4.83614	0.000812962	0.00828816	-0.783343	1	2	APPL2	12	adaptor protein, phosphotyrosine interaction, PH domain and leucine zipper containing 2 [Source:HGNC Symbol;Acc:18242]
ENSG00000136048	0.318255	9.54228	1.65768	0.130253	0.314683	-5.75747	0	1.20986	9.54228	6.30173	0.000115457	0.00205042	1.27373	1	1	DRAM1	12	DNA-damage regulated autophagy modulator 1 [Source:HGNC Symbol;Acc:25645]
ENSG00000136052	0.865054	7.86281	4.17299	0.00217339	0.0187322	-1.69293	1	3.22252	7.86281	15.5453	4.95352e-08	1.93925e-05	9.22514	1	2	SLC41A2	12	solute carrier family 41, member 2 [Source:HGNC Symbol;Acc:31045]
ENSG00000136104	-1.04547	7.86663	-6.90436	5.61911e-05	0.0017097	2.12709	1	-0.886424	7.86663	-5.854	0.00020313	0.00306908	0.677636	1	2	RNASEH2B	13	ribonuclease H2, subunit B [Source:HGNC Symbol;Acc:25671]
ENSG00000136111	-0.234132	4.3642	-0.937482	0.371923	0.599631	-6.61916	0	-1.06873	4.3642	-4.27927	0.00184868	0.0151198	-1.64442	1	1	TBC1D4	13	TBC1 domain family, member 4 [Source:HGNC Symbol;Acc:19165]
ENSG00000136144	-1.08059	6.65448	-4.73231	0.000944324	0.0105828	-0.82467	1	-0.694979	6.65448	-3.04359	0.0132363	0.0648453	-3.6759	0	1	RCBTB1	13	regulator of chromosome condensation (RCC1) and BTB (POZ) domain containing protein 1 [Source:HGNC Symbol;Acc:18243]
ENSG00000136158	1.79134	6.70829	8.18935	1.38946e-05	0.000752434	3.57945	1	1.05714	6.70829	4.83285	0.000816805	0.00831291	-0.788299	1	2	SPRY2	13	sprouty homolog 2 (Drosophila) [Source:HGNC Symbol;Acc:11270]
ENSG00000136161	-1.83342	7.57541	-9.65363	3.43204e-06	0.000322574	5.0158	1	0.0736566	7.57541	0.38783	0.70676	0.851723	-7.13463	0	1	RCBTB2	13	regulator of chromosome condensation (RCC1) and BTB (POZ) domain containing protein 2 [Source:HGNC Symbol;Acc:1914]
ENSG00000136167	-0.0029772	11.1458	-0.02202	0.982891	0.992081	-7.08025	0	0.937144	11.1458	6.93131	5.44663e-05	0.00120092	2.06605	1	1	LCP1	13	lymphocyte cytosolic protein 1 (L-plastin) [Source:HGNC Symbol;Acc:6528]
ENSG00000136169	-1.78091	7.25193	-16.1568	3.48551e-08	2.48272e-05	9.49493	1	-2.68925	7.25193	-24.3975	7.81719e-10	1.97015e-06	12.9657	1	2	SETDB2	13	SET domain, bifurcated 2 [Source:HGNC Symbol;Acc:20263]
ENSG00000136213	-0.97236	6.25485	-5.09898	0.000560295	0.00754066	-0.27905	1	-0.0305295	6.25485	-0.160094	0.876187	0.943662	-7.20264	0	1	CHST12	7	carbohydrate (chondroitin 4) sulfotransferase 12 [Source:HGNC Symbol;Acc:17423]
ENSG00000136235	-0.562247	11.6648	-1.89674	0.088901	0.244881	-5.40904	0	-2.53434	11.6648	-8.54957	9.67907e-06	0.000378447	3.88044	1	1	GPNMB	7	glycoprotein (transmembrane) nmb [Source:HGNC Symbol;Acc:4462]
ENSG00000136244	2.95538	4.04247	14.6123	8.68768e-08	4.1034e-05	8.64343	1	-0.061525	4.04247	-0.304199	0.76759	0.884888	-7.16607	0	1	IL6	7	interleukin 6 (interferon, beta 2) [Source:HGNC Symbol;Acc:6018]
ENSG00000136261	-0.615551	6.08163	-4.3707	0.00161049	0.0151367	-1.38127	1	-0.717464	6.08163	-5.09433	0.000563946	0.00632402	-0.398696	1	2	BZW2	7	basic leucine zipper and W2 domains 2 [Source:HGNC Symbol;Acc:18808]
ENSG00000136286	0.384888	7.51549	1.74582	0.113298	0.287314	-5.63173	0	0.836581	7.51549	3.79465	0.00391481	0.0263234	-2.42549	1	1	MYO1G	7	myosin IG [Source:HGNC Symbol;Acc:13880]
ENSG00000136305	0.306223	5.13539	1.58565	0.145777	0.339074	-5.85758	0	-0.721464	5.13539	-3.73579	0.00429737	0.0281533	-2.52208	1	1	CIDEB	14	cell death-inducing DFFA-like effector b [Source:HGNC Symbol;Acc:1977]
ENSG00000136319	-0.820674	6.00859	-8.07882	1.55635e-05	0.000808799	3.46208	1	-0.365238	6.00859	-3.59545	0.00537629	0.0330705	-2.75361	0	1	TTC5	14	tetratricopeptide repeat domain 5 [Source:HGNC Symbol;Acc:19274]
ENSG00000136379	2.80478	6.08903	10.6419	1.47046e-06	0.000193321	5.87445	1	1.6895	6.08903	6.41028	0.000101075	0.00185483	1.4141	1	2	FAM108C1	15	family with sequence similarity 108, member C1 [Source:HGNC Symbol;Acc:26925]
ENSG00000136404	-0.822152	7.88387	-3.45908	0.00669807	0.0406911	-2.85472	1	-1.45633	7.88387	-6.12728	0.000143436	0.00239291	1.04478	1	2	TM6SF1	15	transmembrane 6 superfamily member 1 [Source:HGNC Symbol;Acc:11860]
ENSG00000136436	-0.226126	6.99968	-1.07901	0.307436	0.537738	-6.47785	0	-1.38665	6.99968	-6.61669	7.88039e-05	0.00155289	1.67664	1	1	CALCOCO2	17	calcium binding and coiled-coil domain 2 [Source:HGNC Symbol;Acc:29912]
ENSG00000136478	-1.6787	6.35925	-12.4164	3.75843e-07	9.32568e-05	7.23118	1	-0.588798	6.35925	-4.35499	0.00164897	0.0139195	-1.52491	1	2	TEX2	17	testis expressed 2 [Source:HGNC Symbol;Acc:30884]
ENSG00000136490	-0.4238	4.85664	-3.55495	0.00573773	0.0367302	-2.69598	0	-0.653235	4.85664	-5.47951	0.000332657	0.00435072	0.157383	1	1	LIMD2	17	LIM domain containing 2 [Source:HGNC Symbol;Acc:28142]
ENSG00000136518	-0.949461	7.52369	-10.2473	2.04551e-06	0.00023518	5.54132	1	-0.574304	7.52369	-6.19831	0.000131244	0.00224696	1.13852	0	1	ACTL6A	3	actin-like 6A [Source:HGNC Symbol;Acc:24124]
ENSG00000136541	-0.02173	4.28128	-0.132522	0.89736	0.952738	-7.07088	0	0.68617	4.28128	4.18464	0.002135	0.0167687	-1.79479	1	1	ERMN	2	ermin, ERM-like protein [Source:HGNC Symbol;Acc:29208]
ENSG00000136560	0.884986	8.71648	6.30219	0.000115392	0.00270507	1.37511	1	0.970087	8.71648	6.90822	5.59405e-05	0.00121864	2.03791	1	2	TANK	2	TRAF family member-associated NFKB activator [Source:HGNC Symbol;Acc:11562]
ENSG00000136603	0.987225	6.0762	4.67844	0.00102127	0.0111531	-0.906446	1	1.13468	6.0762	5.37722	0.000381929	0.00482672	0.0117898	1	2	SKIL	3	SKI-like oncogene [Source:HGNC Symbol;Acc:10897]
ENSG00000136628	-0.456173	8.16571	-3.30921	0.00854801	0.0480645	-3.10404	0	-0.622443	8.16571	-4.51538	0.00129784	0.0117072	-1.27422	1	1	EPRS	1	glutamyl-prolyl-tRNA synthetase [Source:HGNC Symbol;Acc:3418]
ENSG00000136630	1.49141	8.35615	7.38181	3.2746e-05	0.00129347	2.68987	1	1.76534	8.35615	8.73761	8.05261e-06	0.000333795	4.07264	1	2	HLX	1	H2.0-like homeobox [Source:HGNC Symbol;Acc:4978]
ENSG00000136634	1.49246	5.6754	6.31532	0.000113541	0.00268129	1.39203	1	-1.32032	5.6754	-5.58691	0.000288202	0.00393281	0.308641	1	2	IL10	1	interleukin 10 [Source:HGNC Symbol;Acc:5962]
ENSG00000136688	4.28019	4.73254	7.94297	1.79213e-05	0.000869622	3.31596	1	1.68329	4.73254	3.12376	0.0115929	0.0591118	-3.54125	0	1	IL36G	2	interleukin 36, gamma [Source:HGNC Symbol;Acc:15741]
ENSG00000136689	1.62496	8.9042	3.0719	0.0126302	0.0633082	-3.50072	0	2.96983	8.9042	5.61431	0.000277919	0.00383407	0.346955	1	1	IL1RN	2	interleukin 1 receptor antagonist [Source:HGNC Symbol;Acc:6000]
ENSG00000136717	-0.937428	6.67969	-4.14333	0.00227441	0.0193193	-1.7401	1	-1.39718	6.67969	-6.17536	0.000135056	0.00228776	1.1083	1	2	BIN1	2	bridging integrator 1 [Source:HGNC Symbol;Acc:1052]
ENSG00000136718	-0.898052	7.79179	-4.96389	0.000677574	0.00853419	-0.477819	1	-0.704094	7.79179	-3.89181	0.00335967	0.0235665	-2.26682	1	2	IMP4	2	IMP4, U3 small nucleolar ribonucleoprotein, homolog (yeast) [Source:HGNC Symbol;Acc:30856]
ENSG00000136810	1.03601	12.0132	6.91392	5.55728e-05	0.0017065	2.13864	1	0.330407	12.0132	2.20499	0.0535993	0.178297	-5.06269	0	1	TXN	9	thioredoxin [Source:HGNC Symbol;Acc:12435]
ENSG00000136816	-0.812059	7.9802	-4.76281	0.000903536	0.0102827	-0.778562	1	0.340237	7.9802	1.99552	0.0756933	0.225061	-5.39142	0	1	TOR1B	9	torsin family 1, member B (torsin B) [Source:HGNC Symbol;Acc:11995]
ENSG00000136819	-0.873738	8.68274	-7.20358	3.99382e-05	0.00143659	2.48312	1	-0.192185	8.68274	-1.58448	0.146041	0.347019	-5.99309	0	1	C9orf78	9	chromosome 9 open reading frame 78 [Source:HGNC Symbol;Acc:24932]
ENSG00000136827	-0.0931004	7.24293	-0.844614	0.41926	0.644793	-6.70293	0	0.776845	7.24293	7.04759	4.76571e-05	0.00109177	2.20676	1	1	TOR1A	9	torsin family 1, member A (torsin A) [Source:HGNC Symbol;Acc:3098]
ENSG00000136830	0.480524	9.96113	4.60725	0.00113338	0.0120064	-1.01513	0	1.53457	9.96113	14.7134	8.16176e-08	2.40854e-05	8.73992	1	1	FAM129B	9	family with sequence similarity 129, member B [Source:HGNC Symbol;Acc:25282]
ENSG00000136842	1.396	4.0764	11.9705	5.20542e-07	0.000108977	6.91048	1	0.0475092	4.0764	0.407386	0.692827	0.843742	-7.12622	0	1	TMOD1	9	tropomodulin 1 [Source:HGNC Symbol;Acc:11871]
ENSG00000136861	1.11535	7.65211	4.18274	0.00214122	0.0186005	-1.67744	1	1.12705	7.65211	4.22664	0.0020025	0.0160501	-1.7279	1	2	CDK5RAP2	9	CDK5 regulatory subunit associated protein 2 [Source:HGNC Symbol;Acc:18672]
ENSG00000136867	0.337781	7.67499	1.64075	0.133761	0.320476	-5.78122	0	1.26472	7.67499	6.14331	0.00014058	0.00236092	1.066	1	1	SLC31A2	9	solute carrier family 31 (copper transporters), member 2 [Source:HGNC Symbol;Acc:11017]
ENSG00000136870	0.734859	6.29301	5.14589	0.000524828	0.00719524	-0.210633	1	0.707954	6.29301	4.95748	0.000683755	0.00727536	-0.601383	1	2	ZNF189	9	zinc finger protein 189 [Source:HGNC Symbol;Acc:12980]
ENSG00000136877	0.105101	5.28374	0.712274	0.493558	0.704475	-6.80917	0	0.649101	5.28374	4.39901	0.00154353	0.013284	-1.45577	1	1	FPGS	9	folylpolyglutamate synthase [Source:HGNC Symbol;Acc:3824]
ENSG00000136933	-0.881087	6.4947	-5.941	0.000181634	0.00368645	0.900287	1	-0.271332	6.4947	-1.82954	0.0990898	0.270351	-5.64242	0	1	RABEPK	9	Rab9 effector protein with kelch motifs [Source:HGNC Symbol;Acc:16896]
ENSG00000136936	-0.821926	7.12459	-7.5522	2.71732e-05	0.00114759	2.88391	1	-0.172627	7.12459	-1.58617	0.145658	0.346278	-5.99077	0	1	XPA	9	xeroderma pigmentosum, complementation group A [Source:HGNC Symbol;Acc:12814]
ENSG00000136937	-0.671125	7.01413	-5.58596	0.000288567	0.00498076	0.415527	1	0.145484	7.01413	1.2109	0.255436	0.489451	-6.46728	0	1	NCBP1	9	nuclear cap binding protein subunit 1, 80kDa [Source:HGNC Symbol;Acc:7658]
ENSG00000136942	-0.33673	12.0501	-2.7772	0.0206195	0.0889021	-3.9936	0	-0.740218	12.0501	-6.10499	0.00014751	0.00243607	1.01523	1	1	RPL35	9	ribosomal protein L35 [Source:HGNC Symbol;Acc:10344]
ENSG00000136943	0.146901	4.26587	0.84252	0.420373	0.64611	-6.70473	0	-0.658973	4.26587	-3.77942	0.00401026	0.0268627	-2.45046	1	1	CTSL2	9	cathepsin L2 [Source:HGNC Symbol;Acc:2538]
ENSG00000136960	1.11154	7.97346	2.09253	0.0645499	0.198149	-5.10844	0	3.15974	7.97346	5.94834	0.000179934	0.00280065	0.805572	1	1	ENPP2	8	ectonucleotide pyrophosphatase/phosphodiesterase 2 [Source:HGNC Symbol;Acc:3357]
ENSG00000137040	-0.793652	6.16206	-3.82667	0.00372189	0.0275648	-2.25016	1	0.0254591	6.16206	0.122753	0.904882	0.957435	-7.20844	0	1	RANBP6	9	RAN binding protein 6 [Source:HGNC Symbol;Acc:9851]
ENSG00000137076	-0.163092	6.74167	-0.728368	0.484101	0.697278	-6.7971	0	1.2035	6.74167	5.37483	0.000383169	0.00483891	0.00837459	1	1	TLN1	9	talin 1 [Source:HGNC Symbol;Acc:11845]
ENSG00000137094	1.15101	4.3386	5.17403	0.000504721	0.00703455	-0.169758	1	0.411203	4.3386	1.84844	0.0961186	0.265161	-5.61433	0	1	DNAJB5	9	DnaJ (Hsp40) homolog, subfamily B, member 5 [Source:HGNC Symbol;Acc:14887]
ENSG00000137106	-0.287723	8.64092	-1.94523	0.0821674	0.231978	-5.33572	0	-0.587221	8.64092	-3.97007	0.00297294	0.0214913	-2.13972	1	1	GRHPR	9	glyoxylate reductase/hydroxypyruvate reductase [Source:HGNC Symbol;Acc:4570]
ENSG00000137154	-0.377311	11.1908	-2.76211	0.0211457	0.0904401	-4.01876	0	-0.915018	11.1908	-6.69841	7.1512e-05	0.00145309	1.77903	1	1	RPS6	9	ribosomal protein S6 [Source:HGNC Symbol;Acc:10429]
ENSG00000137166	-0.0150911	4.39654	-0.120566	0.906567	0.957035	-7.07254	0	0.691761	4.39654	5.52663	0.000312306	0.00418016	0.223942	1	1	FOXP4	6	forkhead box P4 [Source:HGNC Symbol;Acc:20842]
ENSG00000137168	-0.809145	6.66934	-4.02566	0.00272692	0.0221078	-1.92832	1	-0.295907	6.66934	-1.4722	0.173573	0.386676	-6.14417	0	1	PPIL1	6	peptidylprolyl isomerase (cyclophilin)-like 1 [Source:HGNC Symbol;Acc:9260]
ENSG00000137193	1.73127	5.63234	6.55423	8.49208e-05	0.0022497	1.69576	1	0.762211	5.63234	2.88558	0.0172097	0.0790361	-3.94121	0	1	PIM1	6	pim-1 oncogene [Source:HGNC Symbol;Acc:8986]
ENSG00000137266	1.10039	4.14724	4.68723	0.00100828	0.0110879	-0.89308	1	0.0528624	4.14724	0.225174	0.826653	0.918481	-7.18891	0	1	SLC22A23	6	solute carrier family 22, member 23 [Source:HGNC Symbol;Acc:21106]
ENSG00000137269	-0.0834544	3.70788	-0.472407	0.64739	0.810339	-6.95939	0	0.727253	3.70788	4.11673	0.00236925	0.0181949	-1.90338	1	1	LRRC1	6	leucine rich repeat containing 1 [Source:HGNC Symbol;Acc:14307]
ENSG00000137274	-0.476224	4.6545	-3.75096	0.00419516	0.02997	-2.3737	0	-1.07869	4.6545	-8.49625	1.02034e-05	0.000391618	3.82528	1	1	BPHL	6	biphenyl hydrolase-like (serine hydrolase) [Source:HGNC Symbol;Acc:1094]
ENSG00000137288	-0.47567	7.36597	-2.92386	0.016147	0.0749949	-3.74854	0	-0.794438	7.36597	-4.88328	0.000759905	0.00787022	-0.71241	1	1	C6orf125	6	chromosome 6 open reading frame 125 [Source:HGNC Symbol;Acc:21237]
ENSG00000137309	0.115025	7.09239	0.737654	0.478696	0.693209	-6.79003	0	0.855533	7.09239	5.48653	0.000329535	0.00432917	0.167325	1	1	HMGA1	6	high mobility group AT-hook 1 [Source:HGNC Symbol;Acc:5010]
ENSG00000137312	0.80351	8.04203	8.18532	1.39519e-05	0.000752434	3.5752	1	1.00753	8.04203	10.2637	2.01724e-06	0.000147911	5.50942	1	2	FLOT1	6	flotillin 1 [Source:HGNC Symbol;Acc:3757]
ENSG00000137331	0.877382	12.0807	4.70208	0.000986711	0.0109258	-0.870512	1	0.741607	12.0807	3.97443	0.00295279	0.0214043	-2.13265	1	2	IER3	6	immediate early response 3 [Source:HGNC Symbol;Acc:5392]
ENSG00000137393	0.66818	6.83092	3.20291	0.0101756	0.0541091	-3.28154	0	1.16532	6.83092	5.58594	0.000288576	0.00393486	0.307272	1	1	RNF144B	6	ring finger protein 144B [Source:HGNC Symbol;Acc:21578]
ENSG00000137414	-0.703084	7.0611	-4.42186	0.00149164	0.0144863	-1.30144	1	-0.299918	7.0611	-1.88626	0.0904229	0.253983	-5.55774	0	1	FAM8A1	6	family with sequence similarity 8, member A1 [Source:HGNC Symbol;Acc:16372]
ENSG00000137434	0.424398	4.22324	2.78175	0.0204636	0.088468	-3.98602	0	0.856264	4.22324	5.61244	0.000278606	0.00383753	0.344352	1	1	C6orf52	6	chromosome 6 open reading frame 52 [Source:HGNC Symbol;Acc:20881]
ENSG00000137462	0.670529	9.41936	5.57763	0.00029178	0.00500516	0.40393	1	1.83089	9.41936	15.2298	5.96865e-08	1.98396e-05	9.04468	1	2	TLR2	4	toll-like receptor 2 [Source:HGNC Symbol;Acc:11848]
ENSG00000137474	-0.508799	5.23118	-3.11488	0.011764	0.0600539	-3.42877	0	-1.37517	5.23118	-8.41886	1.10203e-05	0.000410454	3.74472	1	1	MYO7A	11	myosin VIIA [Source:HGNC Symbol;Acc:7606]
ENSG00000137486	-0.982857	6.12777	-8.21972	1.3471e-05	0.000738338	3.61147	1	-0.4418	6.12777	-3.69481	0.00458669	0.0295227	-2.5895	0	1	ARRB1	11	arrestin, beta 1 [Source:HGNC Symbol;Acc:711]
ENSG00000137491	-1.10128	7.43324	-6.7818	6.48209e-05	0.00183871	1.97794	1	-0.0995463	7.43324	-0.613014	0.554377	0.753294	-7.01402	0	1	SLCO2B1	11	solute carrier organic anion transporter family, member 2B1 [Source:HGNC Symbol;Acc:10962]
ENSG00000137496	-0.25234	6.23773	-1.17265	0.269737	0.496443	-6.37589	0	-1.18689	6.23773	-5.51558	0.000316952	0.0042234	0.208371	1	1	IL18BP	11	interleukin 18 binding protein [Source:HGNC Symbol;Acc:5987]
ENSG00000137501	1.38967	6.0372	2.15749	0.0579863	0.183769	-5.00628	0	4.41623	6.0372	6.85632	5.94153e-05	0.00126927	1.97439	1	1	SYTL2	11	synaptotagmin-like 2 [Source:HGNC Symbol;Acc:15585]
ENSG00000137507	1.49159	5.26752	7.49954	2.87763e-05	0.00118724	2.82431	1	1.35314	5.26752	6.80343	6.31988e-05	0.0013276	1.90932	1	2	LRRC32	11	leucine rich repeat containing 32 [Source:HGNC Symbol;Acc:4161]
ENSG00000137509	-0.481949	8.80293	-3.04009	0.0133133	0.0655991	-3.55399	0	-0.894242	8.80293	-5.6408	0.000268352	0.00375202	0.383902	1	1	PRCP	11	prolylcarboxypeptidase (angiotensinase C) [Source:HGNC Symbol;Acc:9344]
ENSG00000137513	-1.58572	5.76348	-7.62519	2.51101e-05	0.00108158	2.96596	1	-1.55306	5.76348	-7.46816	2.97804e-05	0.000794911	2.70169	1	2	NARS2	11	asparaginyl-tRNA synthetase 2, mitochondrial (putative) [Source:HGNC Symbol;Acc:26274]
ENSG00000137547	-0.749736	9.0252	-5.03427	0.000613498	0.00801185	-0.373936	1	-0.0528905	9.0252	-0.355145	0.730303	0.864639	-7.1478	0	1	MRPL15	8	mitochondrial ribosomal protein L15 [Source:HGNC Symbol;Acc:14054]
ENSG00000137563	1.4195	7.25439	3.43794	0.00693163	0.0414509	-2.88982	1	0.39749	7.25439	0.962693	0.359762	0.598991	-6.73053	0	1	GGH	8	gamma-glutamyl hydrolase (conjugase, folylpolygammaglutamyl hydrolase) [Source:HGNC Symbol;Acc:4248]
ENSG00000137642	-2.26316	9.75947	-6.86862	5.85711e-05	0.00175721	2.0838	1	-1.61879	9.75947	-4.91297	0.000728395	0.00762607	-0.667888	1	2	SORL1	11	sortilin-related receptor, L(DLR class) A repeats containing [Source:HGNC Symbol;Acc:11185]
ENSG00000137673	0.218833	6.37918	0.663654	0.522821	0.727253	-6.84414	0	1.34845	6.37918	4.08944	0.00247092	0.018755	-1.94717	1	1	MMP7	11	matrix metallopeptidase 7 (matrilysin, uterine) [Source:HGNC Symbol;Acc:7174]
ENSG00000137700	-0.691568	6.17729	-3.60474	0.00529676	0.0347405	-2.61382	1	-0.746119	6.17729	-3.88908	0.00337407	0.0236064	-2.27126	1	2	SLC37A4	11	solute carrier family 37 (glucose-6-phosphate transporter), member 4 [Source:HGNC Symbol;Acc:4061]
ENSG00000137727	0.841857	4.60471	5.08537	0.000571056	0.00765623	-0.29895	1	1.66138	4.60471	10.0359	2.45221e-06	0.000163516	5.3079	1	2	ARHGAP20	11	Rho GTPase activating protein 20 [Source:HGNC Symbol;Acc:18357]
ENSG00000137752	-0.201597	8.76919	-0.910036	0.385497	0.612049	-6.64468	0	-1.43007	8.76919	-6.45552	9.56644e-05	0.00179682	1.47213	1	1	CASP1	11	caspase 1, apoptosis-related cysteine peptidase (interleukin 1, beta, convertase) [Source:HGNC Symbol;Acc:1499]
ENSG00000137757	1.65921	4.71304	12.041	4.94064e-07	0.000107308	6.96203	1	1.26742	4.71304	9.19778	5.20113e-06	0.000249669	4.52824	1	2	CASP5	11	caspase 5, apoptosis-related cysteine peptidase [Source:HGNC Symbol;Acc:1506]
ENSG00000137760	-0.848913	3.5471	-5.68612	0.000252797	0.004596	0.554112	1	-0.449144	3.5471	-3.00842	0.0140308	0.0679255	-3.73497	0	1	ALKBH8	11	alkB, alkylation repair homolog 8 (E. coli) [Source:HGNC Symbol;Acc:25189]
ENSG00000137801	0.22031	9.67755	1.21547	0.253771	0.478454	-6.32716	0	2.31476	9.67755	12.7708	2.92255e-07	4.2202e-05	7.47608	1	1	THBS1	15	thrombospondin 1 [Source:HGNC Symbol;Acc:11785]
ENSG00000137822	-1.12745	5.54937	-5.88682	0.000194713	0.00384128	0.827481	1	-0.659721	5.54937	-3.44465	0.00685655	0.0398258	-3.0041	1	2	TUBGCP4	15	tubulin, gamma complex associated protein 4 [Source:HGNC Symbol;Acc:16691]
ENSG00000137824	-1.20754	8.32305	-7.47605	2.95242e-05	0.00120594	2.79763	1	-0.221929	8.32305	-1.374	0.201249	0.424447	-6.27056	0	1	FAM82A2	15	family with sequence similarity 82, member A2 [Source:HGNC Symbol;Acc:25550]
ENSG00000137831	-0.364138	5.59049	-1.85924	0.0944583	0.254679	-5.46517	0	-0.657678	5.59049	-3.35802	0.00789345	0.0440897	-3.14868	1	1	UACA	15	uveal autoantigen with coiled-coil domains and ankyrin repeats [Source:HGNC Symbol;Acc:15947]
ENSG00000137834	-0.729047	4.3155	-4.63967	0.00108078	0.0116028	-0.965555	1	0.0809496	4.3155	0.515165	0.618309	0.798998	-7.07275	0	1	SMAD6	15	SMAD family member 6 [Source:HGNC Symbol;Acc:6772]
ENSG00000137841	-0.473685	4.93903	-3.82622	0.00372459	0.0275698	-2.25091	0	-0.859207	4.93903	-6.94029	5.39047e-05	0.00119451	2.07697	1	1	PLCB2	15	phospholipase C, beta 2 [Source:HGNC Symbol;Acc:9055]
ENSG00000137845	-0.289532	6.7846	-1.4662	0.175164	0.381374	-6.01781	0	0.815368	6.7846	4.12904	0.00232484	0.0179163	-1.88365	1	1	ADAM10	15	ADAM metallopeptidase domain 10 [Source:HGNC Symbol;Acc:188]
ENSG00000137871	-1.19291	4.98855	-7.62731	2.50528e-05	0.00108158	2.96834	1	-0.921862	4.98855	-5.89427	0.000192856	0.00295261	0.732398	1	2	ZNF280D	15	zinc finger protein 280D [Source:HGNC Symbol;Acc:25953]
ENSG00000137880	-1.00482	5.01966	-3.08726	0.0123134	0.0620493	-3.47501	0	-1.98638	5.01966	-6.10307	0.000147867	0.00243911	1.01268	1	1	GCHFR	15	GTP cyclohydrolase I feedback regulator [Source:HGNC Symbol;Acc:4194]
ENSG00000137936	-0.764786	4.822	-4.07931	0.00250981	0.0207974	-1.8423	1	-1.26171	4.822	-6.72984	6.89056e-05	0.00141152	1.81817	1	2	BCAR3	1	breast cancer anti-estrogen resistance 3 [Source:HGNC Symbol;Acc:973]
ENSG00000137996	-0.783845	7.42383	-7.34023	3.42877e-05	0.00133813	2.64199	1	-0.333144	7.42383	-3.1197	0.0116709	0.059338	-3.54808	0	1	RTCD1	1	RNA terminal phosphate cyclase domain 1 [Source:HGNC Symbol;Acc:17981]
ENSG00000138031	-0.53179	7.04756	-2.8693	0.0176827	0.0798758	-3.8398	0	-1.75814	7.04756	-9.48614	3.99073e-06	0.000213057	4.80355	1	1	ADCY3	2	adenylate cyclase 3 [Source:HGNC Symbol;Acc:234]
ENSG00000138035	-1.31128	7.71239	-3.45754	0.00671479	0.040735	-2.85727	1	-0.357586	7.71239	-0.942873	0.369298	0.608363	-6.74947	0	1	PNPT1	2	polyribonucleotide nucleotidyltransferase 1 [Source:HGNC Symbol;Acc:23166]
ENSG00000138050	-0.499324	5.09826	-4.30725	0.00177205	0.0162257	-1.48074	0	-0.80134	5.09826	-6.91248	5.56652e-05	0.00121518	2.04311	1	1	THUMPD2	2	THUMP domain containing 2 [Source:HGNC Symbol;Acc:14890]
ENSG00000138061	0.00082795	11.825	0.0076417	0.994062	0.997008	-7.08049	0	0.647088	11.825	5.9724	0.000174489	0.00274544	0.837995	1	1	CYP1B1	2	cytochrome P450, family 1, subfamily B, polypeptide 1 [Source:HGNC Symbol;Acc:2597]
ENSG00000138080	1.15165	4.45927	6.46516	9.45535e-05	0.00237964	1.58342	1	-0.0513561	4.45927	-0.288304	0.779357	0.892366	-7.1712	0	1	EMILIN1	2	elastin microfibril interfacer 1 [Source:HGNC Symbol;Acc:19880]
ENSG00000138085	-0.595076	9.99638	-5.92215	0.000186073	0.00374207	0.875004	1	-0.326685	9.99638	-3.25114	0.00940068	0.0505994	-3.32755	0	1	C2orf28	2	chromosome 2 open reading frame 28 [Source:HGNC Symbol;Acc:24090]
ENSG00000138095	-0.849265	6.78398	-7.06046	4.69624e-05	0.00154952	2.31425	1	-0.911777	6.78398	-7.58016	2.63616e-05	0.00072792	2.8299	1	2	LRPPRC	2	leucine-rich PPR-motif containing [Source:HGNC Symbol;Acc:15714]
ENSG00000138119	-1.16956	9.00597	-4.17602	0.00216331	0.0186819	-1.68811	1	1.463	9.00597	5.22377	0.000471168	0.0055485	-0.209441	1	2	MYOF	10	myoferlin [Source:HGNC Symbol;Acc:3656]
ENSG00000138134	-1.11044	4.29606	-4.43907	0.00145379	0.0142285	-1.27467	1	-0.0227753	4.29606	-0.0910461	0.929363	0.968448	-7.21217	0	1	STAMBPL1	10	STAM binding protein-like 1 [Source:HGNC Symbol;Acc:24105]
ENSG00000138166	3.27487	6.78914	8.70476	8.31374e-06	0.000564014	4.10944	1	2.4862	6.78914	6.60842	7.9585e-05	0.00156479	1.66623	1	2	DUSP5	10	dual specificity phosphatase 5 [Source:HGNC Symbol;Acc:3071]
ENSG00000138172	-1.92823	7.30087	-10.986	1.11203e-06	0.000167441	6.15506	1	-0.464528	7.30087	-2.64664	0.0256486	0.105944	-4.34065	0	1	CALHM2	10	calcium homeostasis modulator 2 [Source:HGNC Symbol;Acc:23493]
ENSG00000138190	-0.588359	6.07801	-4.60407	0.00113869	0.012041	-1.02001	1	-0.372433	6.07801	-2.91439	0.0164035	0.0763517	-3.89286	0	1	EXOC6	10	exocyst complex component 6 [Source:HGNC Symbol;Acc:23196]
ENSG00000138246	-0.889459	6.26548	-5.92472	0.000185461	0.00374021	0.878455	1	-0.719987	6.26548	-4.79586	0.000861445	0.00860322	-0.844205	1	2	DNAJC13	3	DnaJ (Hsp40) homolog, subfamily C, member 13 [Source:HGNC Symbol;Acc:30343]
ENSG00000138356	0.751004	4.16844	4.28433	0.00183456	0.0166399	-1.5168	1	1.44152	4.16844	8.22356	1.34186e-05	0.00046443	3.53858	1	2	AOX1	2	aldehyde oxidase 1 [Source:HGNC Symbol;Acc:553]
ENSG00000138363	-1.55297	6.41158	-9.30863	4.69381e-06	0.00040337	4.69612	1	-1.43541	6.41158	-8.60397	9.17439e-06	0.000369007	3.93641	1	2	ATIC	2	5-aminoimidazole-4-carboxamide ribonucleotide formyltransferase/IMP cyclohydrolase [Source:HGNC Symbol;Acc:794]
ENSG00000138376	-0.235473	6.48177	-0.817549	0.433806	0.657511	-6.72594	0	0.942119	6.48177	3.27098	0.00909986	0.0492847	-3.2943	1	1	BARD1	2	BRCA1 associated RING domain 1 [Source:HGNC Symbol;Acc:952]
ENSG00000138378	1.51507	8.48184	7.6563	2.42833e-05	0.00106011	3.00075	1	0.468444	8.48184	2.36725	0.0409185	0.147597	-4.80102	0	1	STAT4	2	signal transducer and activator of transcription 4 [Source:HGNC Symbol;Acc:11365]
ENSG00000138385	-0.672393	9.81255	-5.45218	0.000345113	0.00561414	0.228153	1	-0.510697	9.81255	-4.14105	0.00228239	0.0176432	-1.86443	0	1	SSB	2	Sjogren syndrome antigen B (autoantigen La) [Source:HGNC Symbol;Acc:11316]
ENSG00000138386	0.465207	6.55191	3.92643	0.00318242	0.0246254	-2.08827	0	0.761161	6.55191	6.42434	9.93588e-05	0.00183072	1.43216	1	1	NAB1	2	NGFI-A binding protein 1 (EGR1 binding protein 1) [Source:HGNC Symbol;Acc:7626]
ENSG00000138399	-0.580821	9.12954	-6.0183	0.00016459	0.003456	1.00345	0	-0.640958	9.12954	-6.64141	7.65158e-05	0.00152705	1.70771	1	1	FASTKD1	2	FAST kinase domains 1 [Source:HGNC Symbol;Acc:26150]
ENSG00000138411	1.14347	3.56363	7.43843	3.07669e-05	0.00123467	2.75474	1	0.26073	3.56363	1.69608	0.1226	0.310947	-5.83668	0	1	HECW2	2	HECT, C2 and WW domain containing E3 ubiquitin protein ligase 2 [Source:HGNC Symbol;Acc:29853]
ENSG00000138439	-0.962987	4.32844	-5.22567	0.000469936	0.00670896	-0.0950298	1	-1.82297	4.32844	-9.8924	2.77839e-06	0.000175437	5.1788	1	2	FAM117B	2	family with sequence similarity 117, member B [Source:HGNC Symbol;Acc:14440]
ENSG00000138442	-0.859361	5.83862	-8.82037	7.43375e-06	0.000535075	4.22454	1	-0.64261	5.83862	-6.59567	8.08067e-05	0.0015814	1.65017	1	2	WDR12	2	WD repeat domain 12 [Source:HGNC Symbol;Acc:14098]
ENSG00000138448	0.994764	6.69811	6.83268	6.10748e-05	0.00178656	2.0401	1	0.712809	6.69811	4.89603	0.000746198	0.00776937	-0.693276	1	2	ITGAV	2	integrin, alpha V (vitronectin receptor, alpha polypeptide, antigen CD51) [Source:HGNC Symbol;Acc:6150]
ENSG00000138449	-0.0418791	5.88902	-0.251354	0.806938	0.905006	-7.04594	0	-4.3411	5.88902	-26.0548	4.2439e-10	1.97015e-06	13.4604	1	1	SLC40A1	2	solute carrier family 40 (iron-regulated transporter), member 1 [Source:HGNC Symbol;Acc:10909]
ENSG00000138496	-0.311969	6.87547	-0.886024	0.397659	0.62427	-6.66649	0	1.21843	6.87547	3.46047	0.0066831	0.039089	-2.97776	1	1	PARP9	3	poly (ADP-ribose) polymerase family, member 9 [Source:HGNC Symbol;Acc:24118]
ENSG00000138639	1.00727	4.6076	6.85485	5.9517e-05	0.00176424	2.06707	1	-0.257168	4.6076	-1.75012	0.112524	0.294378	-5.75892	0	1	ARHGAP24	4	Rho GTPase activating protein 24 [Source:HGNC Symbol;Acc:25361]
ENSG00000138640	-0.659306	4.64579	-3.11568	0.0117486	0.0600103	-3.42745	0	-1.22302	4.64579	-5.77962	0.000223696	0.00330054	0.575894	1	1	FAM13A	4	family with sequence similarity 13, member A [Source:HGNC Symbol;Acc:19367]
ENSG00000138660	-0.59059	7.93571	-4.41311	0.00151128	0.0146103	-1.31507	1	-0.384107	7.93571	-2.87019	0.0176565	0.0805008	-3.96702	0	1	AP1AR	4	adaptor-related protein complex 1 associated regulatory protein [Source:HGNC Symbol;Acc:28808]
ENSG00000138670	0.152334	5.72093	0.516482	0.617424	0.790942	-6.93606	0	1.01824	5.72093	3.45227	0.00677237	0.039467	-2.9914	1	1	RASGEF1B	4	RasGEF domain family, member 1B [Source:HGNC Symbol;Acc:24881]
ENSG00000138678	0.511961	7.31623	3.39864	0.00738836	0.0434014	-2.95512	0	0.908834	7.31623	6.03327	0.000161493	0.00260078	0.919664	1	1	AGPAT9	4	1-acylglycerol-3-phosphate O-acyltransferase 9 [Source:HGNC Symbol;Acc:28157]
ENSG00000138688	-0.71606	8.18992	-4.86535	0.000779636	0.00936633	-0.62448	1	-0.548384	8.18992	-3.72606	0.00436431	0.0284193	-2.53808	0	1	KIAA1109	4	KIAA1109 [Source:HGNC Symbol;Acc:26953]
ENSG00000138744	-0.63626	7.46661	-5.95305	0.000178855	0.00365448	0.916426	1	-1.05449	7.46661	-9.86613	2.84315e-06	0.000177787	5.15496	1	2	NAAA	4	N-acylethanolamine acid amidase [Source:HGNC Symbol;Acc:736]
ENSG00000138756	-0.818813	7.18061	-4.85358	0.000792877	0.00945709	-0.642079	1	-0.266455	7.18061	-1.57944	0.147189	0.34852	-6.00002	0	1	BMP2K	4	BMP2 inducible kinase [Source:HGNC Symbol;Acc:18041]
ENSG00000138757	0.279935	8.48566	2.1702	0.0567794	0.181014	-4.98617	0	0.680061	8.48566	5.27219	0.000440805	0.00529574	-0.139274	1	1	G3BP2	4	GTPase activating protein (SH3 domain) binding protein 2 [Source:HGNC Symbol;Acc:30291]
ENSG00000138758	0.186591	6.60934	0.879813	0.400848	0.626826	-6.67205	0	1.10642	6.60934	5.21699	0.000475596	0.00558199	-0.219294	1	1	2011-09-11	4	septin 11 [Source:HGNC Symbol;Acc:25589]
ENSG00000138760	-0.859715	8.98145	-4.8602	0.000785402	0.00940519	-0.632181	1	0.231806	8.98145	1.31046	0.221089	0.448544	-6.34925	0	1	SCARB2	4	scavenger receptor class B, member 2 [Source:HGNC Symbol;Acc:1665]
ENSG00000138767	-0.603807	5.22899	-4.14568	0.00226621	0.0192973	-1.73636	1	-0.134634	5.22899	-0.924383	0.378358	0.616142	-6.76685	0	1	CNOT6L	4	CCR4-NOT transcription complex, subunit 6-like [Source:HGNC Symbol;Acc:18042]
ENSG00000138796	-0.800976	7.16534	-3.38753	0.00752302	0.0439288	-2.97359	1	-0.753928	7.16534	-3.18856	0.0104186	0.0544321	-3.43249	0	1	HADH	4	hydroxyacyl-CoA dehydrogenase [Source:HGNC Symbol;Acc:4799]
ENSG00000138801	-0.796696	8.8946	-4.1493	0.00225367	0.0192359	-1.7306	1	0.685745	8.8946	3.57145	0.00558747	0.034025	-2.79336	1	2	PAPSS1	4	3'-phosphoadenosine 5'-phosphosulfate synthase 1 [Source:HGNC Symbol;Acc:8603]
ENSG00000138821	1.07641	4.82854	5.16253	0.000512833	0.00708039	-0.186442	1	1.51349	4.82854	7.25876	3.75425e-05	0.000927612	2.45797	1	2	SLC39A8	4	solute carrier family 39 (zinc transporter), member 8 [Source:HGNC Symbol;Acc:20862]
ENSG00000138964	-0.141455	5.56464	-0.821476	0.431674	0.655897	-6.72264	0	-0.594386	5.56464	-3.4518	0.00677762	0.0394846	-2.9922	1	1	PARVG	22	parvin, gamma [Source:HGNC Symbol;Acc:14654]
ENSG00000139055	-1.07275	4.81495	-4.88723	0.000755625	0.00920272	-0.591789	1	-0.0892818	4.81495	-0.406748	0.69328	0.843985	-7.1265	0	1	ERP27	12	endoplasmic reticulum protein 27 [Source:HGNC Symbol;Acc:26495]
ENSG00000139112	0.83365	5.99448	4.85559	0.000790607	0.0094428	-0.639083	1	0.964534	5.99448	5.61792	0.000276593	0.00382176	0.351998	1	2	GABARAPL1	12	GABA(A) receptor-associated protein like 1 [Source:HGNC Symbol;Acc:4068]
ENSG00000139117	0.856289	6.39817	4.60453	0.00113793	0.0120401	-1.01931	1	0.545773	6.39817	2.93479	0.0158563	0.0744663	-3.85863	0	1	CPNE8	12	copine VIII [Source:HGNC Symbol;Acc:23498]
ENSG00000139131	-0.627846	6.98638	-4.23596	0.00197432	0.0175487	-1.59313	1	-0.398273	6.98638	-2.68707	0.0239714	0.100609	-4.27331	0	1	YARS2	12	tyrosyl-tRNA synthetase 2, mitochondrial [Source:HGNC Symbol;Acc:24249]
ENSG00000139178	0.441431	5.20384	1.43895	0.182549	0.391505	-6.05327	0	3.0497	5.20384	9.94126	2.66224e-06	0.000171171	5.22296	1	1	C1RL	12	complement component 1, r subcomponent-like [Source:HGNC Symbol;Acc:21265]
ENSG00000139187	-0.689549	4.03801	-3.276	0.00902534	0.0498786	-3.15944	1	-0.524763	4.03801	-2.49312	0.0331588	0.127573	-4.59486	0	1	KLRG1	12	killer cell lectin-like receptor subfamily G, member 1 [Source:HGNC Symbol;Acc:6380]
ENSG00000139219	0.14515	4.47076	0.633096	0.541734	0.740282	-6.86496	0	5.12137	4.47076	22.3378	1.77131e-09	2.83683e-06	12.2775	1	1	COL2A1	12	collagen, type II, alpha 1 [Source:HGNC Symbol;Acc:2200]
ENSG00000139278	-0.199935	9.79541	-1.8989	0.0885904	0.244279	-5.40579	0	-0.811088	9.79541	-7.70335	2.30887e-05	0.000661234	2.96921	1	1	GLIPR1	12	GLI pathogenesis-related 1 [Source:HGNC Symbol;Acc:17001]
ENSG00000139289	2.04839	7.0234	8.5068	1.00972e-05	0.000621965	3.90918	1	2.99923	7.0234	12.4556	3.65408e-07	4.96672e-05	7.25158	1	2	PHLDA1	12	pleckstrin homology-like domain, family A, member 1 [Source:HGNC Symbol;Acc:8933]
ENSG00000139318	0.764576	10.4904	4.72873	0.000949247	0.0106177	-0.830098	1	1.78984	10.4904	11.0698	1.04013e-06	9.81325e-05	6.18965	1	2	DUSP6	12	dual specificity phosphatase 6 [Source:HGNC Symbol;Acc:3072]
ENSG00000139329	0.076422	3.02647	0.312645	0.761361	0.879131	-7.02711	0	0.88373	3.02647	3.61537	0.00520725	0.0323015	-2.72064	1	1	LUM	12	lumican [Source:HGNC Symbol;Acc:6724]
ENSG00000139344	-0.665844	3.92242	-2.4784	0.0339852	0.126874	-4.48848	0	-1.24593	3.92242	-4.63758	0.00108409	0.0102087	-1.08554	1	1	AMDHD1	12	amidohydrolase domain containing 1 [Source:HGNC Symbol;Acc:28577]
ENSG00000139354	-0.543223	6.08555	-1.42699	0.185877	0.396278	-6.0687	0	-2.03288	6.08555	-5.34016	0.000401674	0.00498304	-0.0413281	1	1	GAS2L3	12	growth arrest-specific 2 like 3 [Source:HGNC Symbol;Acc:27475]
ENSG00000139370	-1.05474	9.14365	-5.63328	0.000271029	0.00480353	0.481188	1	-0.981038	9.14365	-5.23965	0.000460968	0.00545947	-0.18639	1	2	SLC15A4	12	solute carrier family 15, member 4 [Source:HGNC Symbol;Acc:23090]
ENSG00000139405	0.250042	6.69986	1.5354	0.157562	0.356449	-5.9259	0	1.10592	6.69986	6.79098	6.41271e-05	0.0013338	1.89395	1	1	C12orf52	12	chromosome 12 open reading frame 52 [Source:HGNC Symbol;Acc:25925]
ENSG00000139410	-0.732221	6.88312	-3.99538	0.00285815	0.0227853	-1.97701	1	0.363765	6.88312	1.98489	0.0770202	0.228236	-5.40778	0	1	SDSL	12	serine dehydratase-like [Source:HGNC Symbol;Acc:30404]
ENSG00000139433	0.917837	8.30122	6.94397	5.36762e-05	0.00168336	2.17487	1	0.638457	8.30122	4.8303	0.000819807	0.00832904	-0.792154	1	2	GLTP	12	glycolipid transfer protein [Source:HGNC Symbol;Acc:24867]
ENSG00000139436	-0.769257	7.11432	-5.43734	0.000352084	0.00567101	0.207214	1	-0.334299	7.11432	-2.36292	0.0412146	0.14825	-4.80806	0	1	GIT2	12	G protein-coupled receptor kinase interacting ArfGAP 2 [Source:HGNC Symbol;Acc:4273]
ENSG00000139496	0.987699	4.92507	6.44879	9.64497e-05	0.002417	1.56266	1	0.716956	4.92507	4.68108	0.00101735	0.00975118	-1.01887	1	2	NUPL1	13	nucleoporin like 1 [Source:HGNC Symbol;Acc:20261]
ENSG00000139505	0.280341	7.16182	1.82692	0.0995074	0.263896	-5.51314	0	0.751623	7.16182	4.89816	0.000743937	0.00775233	-0.690085	1	1	MTMR6	13	myotubularin related protein 6 [Source:HGNC Symbol;Acc:7453]
ENSG00000139508	-1.91545	7.49242	-5.51168	0.000318612	0.00533553	0.311812	1	-1.52233	7.49242	-4.38047	0.00158703	0.0135654	-1.48485	1	2	SLC46A3	13	solute carrier family 46, member 3 [Source:HGNC Symbol;Acc:27501]
ENSG00000139531	0.095146	5.08031	0.519329	0.615512	0.789478	-6.93448	0	1.032	5.08031	5.63287	0.000271178	0.00377655	0.372853	1	1	SUOX	12	sulfite oxidase [Source:HGNC Symbol;Acc:11460]
ENSG00000139546	-0.611095	6.72766	-4.64483	0.00107264	0.0115365	-0.957665	1	0.0611228	6.72766	0.464585	0.65278	0.820706	-7.09933	0	1	TARBP2	12	TAR (HIV-1) RNA binding protein 2 [Source:HGNC Symbol;Acc:11569]
ENSG00000139567	0.124515	4.3012	0.743824	0.475127	0.690634	-6.78529	0	0.838051	4.3012	5.00633	0.000638118	0.00691373	-0.528724	1	1	ACVRL1	12	activin A receptor type II-like 1 [Source:HGNC Symbol;Acc:175]
ENSG00000139572	0.661062	8.83392	2.7247	0.0225097	0.0946426	-4.08108	0	2.24851	8.83392	9.26772	4.87445e-06	0.000239201	4.59572	1	1	GPR84	12	G protein-coupled receptor 84 [Source:HGNC Symbol;Acc:4535]
ENSG00000139613	-0.368945	6.08039	-2.90311	0.0167145	0.0768223	-3.78326	0	-0.591673	6.08039	-4.65568	0.00105577	0.0100259	-1.05777	1	1	SMARCC2	12	SWI/SNF related, matrix associated, actin dependent regulator of chromatin, subfamily c, member 2 [Source:HGNC Symbol;Acc:11105]
ENSG00000139624	0.31559	7.20758	2.52788	0.031286	0.119507	-4.40715	0	1.09029	7.20758	8.73324	8.08683e-06	0.000334427	4.06821	1	1	CERS5	12	ceramide synthase 5 [Source:HGNC Symbol;Acc:23749]
ENSG00000139631	0.375074	6.98617	2.08653	0.0651913	0.199457	-5.11782	0	1.43197	6.98617	7.96603	1.7495e-05	0.000554344	3.26048	1	1	CSAD	12	cysteine sulfinic acid decarboxylase [Source:HGNC Symbol;Acc:18966]
ENSG00000139641	-0.833566	8.42047	-3.18436	0.0104908	0.0551856	-3.31254	0	-1.9309	8.42047	-7.37637	3.29433e-05	0.000848483	2.5955	1	1	ESYT1	12	extended synaptotagmin-like protein 1 [Source:HGNC Symbol;Acc:29534]
ENSG00000139651	0.727647	5.14563	4.46619	0.0013962	0.0138195	-1.23256	1	1.1374	5.14563	6.98119	5.14242e-05	0.00115554	2.12661	1	2	ZNF740	12	zinc finger protein 740 [Source:HGNC Symbol;Acc:27465]
ENSG00000139675	-0.836606	9.52829	-6.27215	0.000119751	0.00277432	1.33631	1	-0.956116	9.52829	-7.16813	4.15642e-05	0.00100013	2.35083	1	2	HNRNPA1L2	13	heterogeneous nuclear ribonucleoprotein A1-like 2 [Source:HGNC Symbol;Acc:27067]
ENSG00000139679	-1.74084	10.5487	-13.6316	1.62706e-07	5.97166e-05	8.04487	1	-0.597224	10.5487	-4.67655	0.00102409	0.0097998	-1.0258	1	2	LPAR6	13	lysophosphatidic acid receptor 6 [Source:HGNC Symbol;Acc:15520]
ENSG00000139687	-1.23273	6.55438	-9.43786	4.16977e-06	0.000365467	4.81714	1	-0.684051	6.55438	-5.23714	0.000462568	0.00547284	-0.190039	1	2	RB1	13	retinoblastoma 1 [Source:HGNC Symbol;Acc:9884]
ENSG00000139722	0.749209	7.13997	3.97692	0.00294138	0.0232086	-2.00674	1	0.0627522	7.13997	0.333099	0.746354	0.873425	-7.15604	0	1	VPS37B	12	vacuolar protein sorting 37 homolog B (S. cerevisiae) [Source:HGNC Symbol;Acc:25754]
ENSG00000139746	-0.80402	4.19223	-3.79849	0.00389117	0.0285089	-2.29609	1	0.0497507	4.19223	0.235041	0.819207	0.914342	-7.18642	0	1	RBM26	13	RNA binding motif protein 26 [Source:HGNC Symbol;Acc:20327]
ENSG00000139832	1.55231	9.42939	11.2564	8.97618e-07	0.000147788	6.36929	1	0.0842288	9.42939	0.610774	0.555798	0.754643	-7.01547	0	1	RAB20	13	RAB20, member RAS oncogene family [Source:HGNC Symbol;Acc:18260]
ENSG00000139899	-0.341736	5.10708	-2.06964	0.0670292	0.202997	-5.14418	0	0.755129	5.10708	4.57324	0.00119152	0.0109557	-1.18464	1	1	CBLN3	14	cerebellin 3 precursor [Source:HGNC Symbol;Acc:20146]
ENSG00000139926	0.970302	3.68142	7.96091	1.75886e-05	0.000866425	3.33539	1	0.518257	3.68142	4.25207	0.00192654	0.0155992	-1.68752	0	1	FRMD6	14	FERM domain containing 6 [Source:HGNC Symbol;Acc:19839]
ENSG00000139946	0.100404	5.38712	0.417223	0.685864	0.834222	-6.98579	0	-1.16517	5.38712	-4.84178	0.000806404	0.0082356	-0.774832	1	1	PELI2	14	pellino homolog 2 (Drosophila) [Source:HGNC Symbol;Acc:8828]
ENSG00000139974	0.0506241	9.24631	0.345379	0.737397	0.865126	-7.01542	0	-1.67277	9.24631	-11.4124	7.94872e-07	8.38519e-05	6.4642	1	1	SLC38A6	14	solute carrier family 38, member 6 [Source:HGNC Symbol;Acc:19863]
ENSG00000139998	-0.669643	3.73193	-3.42471	0.00708192	0.0420282	-2.91178	1	0.153856	3.73193	0.786855	0.450708	0.675518	-6.88688	0	1	RAB15	14	RAB15, member RAS onocogene family [Source:HGNC Symbol;Acc:20150]
ENSG00000140006	-0.670598	5.37998	-4.23407	0.00197998	0.0175813	-1.59611	1	-0.270878	5.37998	-1.71029	0.119874	0.306504	-5.81636	0	1	WDR89	14	WD repeat domain 89 [Source:HGNC Symbol;Acc:20489]
ENSG00000140030	-1.01715	9.11171	-5.15022	0.000521677	0.0071632	-0.204333	1	0.235925	9.11171	1.19458	0.26146	0.49678	-6.48599	0	1	GPR65	14	G protein-coupled receptor 65 [Source:HGNC Symbol;Acc:4517]
ENSG00000140092	-1.67274	4.38539	-7.2828	3.65484e-05	0.0013639	2.57551	1	-0.820943	4.38539	-3.57424	0.0055625	0.0338964	-2.78874	1	2	FBLN5	14	fibulin 5 [Source:HGNC Symbol;Acc:3602]
ENSG00000140199	0.737753	6.48262	4.30604	0.00177527	0.0162431	-1.48263	1	0.670227	6.48262	3.91192	0.0032555	0.0230114	-2.2341	1	2	SLC12A6	15	solute carrier family 12 (potassium/chloride transporters), member 6 [Source:HGNC Symbol;Acc:10914]
ENSG00000140262	-0.684062	4.30131	-6.15109	0.000139218	0.00306576	1.17869	1	-0.0787569	4.30131	-0.708182	0.495981	0.710417	-6.94794	0	1	TCF12	15	transcription factor 12 [Source:HGNC Symbol;Acc:11623]
ENSG00000140280	-1.39079	8.28263	-6.57802	8.25318e-05	0.00220076	1.72558	1	-0.726207	8.28263	-3.43474	0.00696767	0.0402854	-3.02063	1	2	LYSMD2	15	LysM, putative peptidoglycan-binding, domain containing 2 [Source:HGNC Symbol;Acc:28571]
ENSG00000140326	1.85113	7.2655	10.218	2.09712e-06	0.000237762	5.5161	1	2.35777	7.2655	13.0146	2.46705e-07	3.89222e-05	7.64578	1	2	CDAN1	15	congenital dyserythropoietic anemia, type I [Source:HGNC Symbol;Acc:1713]
ENSG00000140332	-0.538571	5.59318	-2.21345	0.0528532	0.172205	-4.91746	0	-1.67298	5.59318	-6.87571	5.80903e-05	0.00124955	1.99816	1	1	TLE3	15	transducin-like enhancer of split 3 (E(sp1) homolog, Drosophila) [Source:HGNC Symbol;Acc:11839]
ENSG00000140350	-1.36474	6.35904	-6.74079	6.80226e-05	0.00191125	1.92759	1	-1.32378	6.35904	-6.53849	8.65425e-05	0.0016699	1.57784	1	2	ANP32A	15	acidic (leucine-rich) nuclear phosphoprotein 32 family, member A [Source:HGNC Symbol;Acc:13233]
ENSG00000140365	-0.38924	7.05343	-2.63905	0.0259761	0.104643	-4.22341	0	-0.586119	7.05343	-3.97389	0.0029553	0.0214077	-2.13353	1	1	COMMD4	15	COMM domain containing 4 [Source:HGNC Symbol;Acc:26027]
ENSG00000140368	-0.370679	6.6559	-1.48816	0.169401	0.373556	-5.98892	0	1.3486	6.6559	5.41421	0.000363258	0.00465082	0.0646159	1	1	PSTPIP1	15	proline-serine-threonine phosphatase interacting protein 1 [Source:HGNC Symbol;Acc:9580]
ENSG00000140379	1.97804	8.11811	3.93461	0.00314199	0.0244059	-2.07505	1	1.23596	8.11811	2.4585	0.0351344	0.132825	-4.65179	0	1	BCL2A1	15	BCL2-related protein A1 [Source:HGNC Symbol;Acc:991]
ENSG00000140391	-0.216871	9.11817	-1.95422	0.0809721	0.229767	-5.32203	0	0.741426	9.11817	6.681	7.3002e-05	0.0014698	1.75728	1	1	TSPAN3	15	tetraspanin 3 [Source:HGNC Symbol;Acc:17752]
ENSG00000140395	-0.597127	9.44329	-6.0251	0.000163176	0.0034345	1.01248	1	-0.310638	9.44329	-3.13438	0.0113914	0.0583717	-3.52342	0	1	WDR61	15	WD repeat domain 61 [Source:HGNC Symbol;Acc:30300]
ENSG00000140398	-0.38548	4.12018	-2.04606	0.0696769	0.208262	-5.18083	0	-1.00442	4.12018	-5.33127	0.000406573	0.00501117	-0.054104	1	1	NEIL1	15	nei endonuclease VIII-like 1 (E. coli) [Source:HGNC Symbol;Acc:18448]
ENSG00000140403	2.41771	6.97988	8.21797	1.34952e-05	0.000738338	3.60962	1	0.730293	6.97988	2.48231	0.0337632	0.129331	-4.61264	0	1	DNAJA4	15	DnaJ (Hsp40) homolog, subfamily A, member 4 [Source:HGNC Symbol;Acc:14885]
ENSG00000140406	0.88401	5.10189	8.24755	1.30953e-05	0.000723197	3.64072	1	0.239826	5.10189	2.23751	0.0507838	0.171358	-5.01068	0	1	MESDC1	15	mesoderm development candidate 1 [Source:HGNC Symbol;Acc:13519]
ENSG00000140443	0.391175	4.7559	2.64934	0.0255331	0.103382	-4.20635	0	0.642178	4.7559	4.34933	0.00166309	0.0139984	-1.53382	1	1	IGF1R	15	insulin-like growth factor 1 receptor [Source:HGNC Symbol;Acc:5465]
ENSG00000140450	1.54124	6.83037	7.05711	4.71425e-05	0.00154952	2.31026	1	1.49576	6.83037	6.84883	5.99354e-05	0.00127537	1.9652	1	2	ARRDC4	15	arrestin domain containing 4 [Source:HGNC Symbol;Acc:28087]
ENSG00000140451	3.81904	7.44858	6.81942	6.2028e-05	0.00179251	2.02393	1	6.15806	7.44858	10.9961	1.10313e-06	0.000100175	6.12949	1	2	PIF1	15	PIF1 5'-to-3' DNA helicase homolog (S. cerevisiae) [Source:HGNC Symbol;Acc:26220]
ENSG00000140455	-0.194408	7.38925	-1.43134	0.184663	0.394662	-6.06311	0	0.611772	7.38925	4.5042	0.00131953	0.0118663	-1.29159	1	1	USP3	15	ubiquitin specific peptidase 3 [Source:HGNC Symbol;Acc:12626]
ENSG00000140463	-0.151079	6.26497	-0.940614	0.370396	0.597771	-6.61621	0	-0.775393	6.26497	-4.82759	0.000823004	0.00834277	-0.796244	1	1	BBS4	15	Bardet-Biedl syndrome 4 [Source:HGNC Symbol;Acc:969]
ENSG00000140488	-0.274869	5.2867	-1.50916	0.164044	0.365817	-5.96105	0	-1.26163	5.2867	-6.92697	5.47399e-05	0.00120394	2.06077	1	1	CELF6	15	CUGBP, Elav-like family member 6 [Source:HGNC Symbol;Acc:14059]
ENSG00000140519	2.45138	4.26877	10.9885	1.10979e-06	0.000167441	6.15708	1	0.103685	4.26877	0.464776	0.652648	0.82062	-7.09923	0	1	RHCG	15	Rh family, C glycoprotein [Source:HGNC Symbol;Acc:18140]
ENSG00000140526	-0.744995	6.50521	-4.2297	0.00199319	0.017663	-1.60302	1	0.537704	6.50521	3.05281	0.0130357	0.0641784	-3.66042	0	1	ABHD2	15	abhydrolase domain containing 2 [Source:HGNC Symbol;Acc:18717]
ENSG00000140543	-0.665819	4.38857	-3.79685	0.00390126	0.0285418	-2.29876	1	-0.244658	4.38857	-1.39517	0.194983	0.416921	-6.24379	0	1	DET1	15	de-etiolated homolog 1 (Arabidopsis) [Source:HGNC Symbol;Acc:25477]
ENSG00000140577	0.137011	8.15784	1.04929	0.320217	0.550547	-6.50883	0	1.01861	8.15784	7.80094	2.08102e-05	0.000620327	3.07834	1	1	CRTC3	15	CREB regulated transcription coactivator 3 [Source:HGNC Symbol;Acc:26148]
ENSG00000140598	0.512776	6.78884	3.25869	0.0092851	0.0508157	-3.18835	0	0.843306	6.78884	5.3592	0.000391394	0.0049111	-0.0140083	1	1	EFTUD1	15	elongation factor Tu GTP binding domain containing 1 [Source:HGNC Symbol;Acc:25789]
ENSG00000140740	-0.157951	9.37976	-1.38821	0.197023	0.409891	-6.11817	0	-0.62218	9.37976	-5.46827	0.000337722	0.00439412	0.141454	1	1	UQCRC2	16	ubiquinol-cytochrome c reductase core protein II [Source:HGNC Symbol;Acc:12586]
ENSG00000140749	-0.283955	6.93824	-2.13191	0.0604907	0.189519	-5.04664	0	0.748121	6.93824	5.61684	0.00027699	0.00382424	0.350488	1	1	IGSF6	16	immunoglobulin superfamily, member 6 [Source:HGNC Symbol;Acc:5953]
ENSG00000140750	-1.28378	6.58754	-11.1986	9.39265e-07	0.000151808	6.324	1	-1.30558	6.58754	-11.3888	8.09522e-07	8.43867e-05	6.44558	1	2	ARHGAP17	16	Rho GTPase activating protein 17 [Source:HGNC Symbol;Acc:18239]
ENSG00000140807	0.430625	3.85503	2.60677	0.0274174	0.108885	-4.27688	0	0.795603	3.85503	4.81615	0.000836646	0.00841759	-0.813517	1	1	NKD1	16	naked cuticle homolog 1 (Drosophila) [Source:HGNC Symbol;Acc:17045]
ENSG00000140848	-0.286073	7.02846	-1.42143	0.18744	0.398327	-6.07585	0	-0.776187	7.02846	-3.85671	0.00355002	0.0244778	-2.32404	1	1	CPNE2	16	copine II [Source:HGNC Symbol;Acc:2315]
ENSG00000140859	0.361907	7.01974	2.05053	0.0691681	0.207304	-5.1739	0	1.98523	7.01974	11.2481	9.03467e-07	8.84243e-05	6.33359	1	1	KIFC3	16	kinesin family member C3 [Source:HGNC Symbol;Acc:6326]
ENSG00000140939	1.02552	5.59522	6.34974	0.00010884	0.00262662	1.43626	1	0.599493	5.59522	3.71189	0.00446374	0.0288578	-2.56139	1	2	NOL3	16	nucleolar protein 3 (apoptosis repressor with CARD domain) [Source:HGNC Symbol;Acc:7869]
ENSG00000140968	-1.27652	9.23439	-6.00753	0.000166857	0.00347872	0.989128	1	-1.54903	9.23439	-7.28998	3.62573e-05	0.000906021	2.49464	1	2	IRF8	16	interferon regulatory factor 8 [Source:HGNC Symbol;Acc:5358]
ENSG00000141101	-0.505066	7.85048	-2.36417	0.0411291	0.144654	-4.67492	0	-1.05937	7.85048	-4.95884	0.000682444	0.00727536	-0.599366	1	1	NOB1	16	NIN1/RPN12 binding protein 1 homolog (S. cerevisiae) [Source:HGNC Symbol;Acc:29540]
ENSG00000141295	-0.806031	4.7673	-3.75441	0.00417228	0.0298429	-2.36806	1	-0.896834	4.7673	-4.17736	0.00215889	0.0168961	-1.8064	1	2	SCRN2	17	secernin 2 [Source:HGNC Symbol;Acc:30381]
ENSG00000141378	-0.727203	7.53025	-4.15287	0.00224139	0.0191502	-1.72492	1	-0.65833	7.53025	-3.75955	0.00413842	0.0274601	-2.48305	1	2	PTRH2	17	peptidyl-tRNA hydrolase 2 [Source:HGNC Symbol;Acc:24265]
ENSG00000141380	1.00558	7.53193	8.56189	9.56213e-06	0.000608145	3.96532	1	1.05491	7.53193	8.98197	6.37009e-06	0.000284025	4.31713	1	2	SS18	18	synovial sarcoma translocation, chromosome 18 [Source:HGNC Symbol;Acc:11340]
ENSG00000141385	-0.676954	7.24553	-4.4591	0.00141101	0.0139259	-1.24355	1	-1.00699	7.24553	-6.63307	7.728e-05	0.00153488	1.69723	1	2	AFG3L2	18	AFG3 ATPase family gene 3-like 2 (S. cerevisiae) [Source:HGNC Symbol;Acc:315]
ENSG00000141391	-0.602172	4.52704	-3.42233	0.00710934	0.0421559	-2.91574	1	0.0936923	4.52704	0.532483	0.606722	0.790726	-7.06305	0	1	SLMO1	18	slowmo homolog 1 (Drosophila) [Source:HGNC Symbol;Acc:24639]
ENSG00000141401	0.725501	6.97668	2.44798	0.0357574	0.131759	-4.53831	0	2.26962	6.97668	7.65815	2.4235e-05	0.000685975	2.9183	1	1	IMPA2	18	inositol(myo)-1(or 4)-monophosphatase 2 [Source:HGNC Symbol;Acc:6051]
ENSG00000141404	0.256469	3.11499	1.54104	0.156199	0.354198	-5.9183	0	0.72371	3.11499	4.34853	0.00166509	0.0140019	-1.53508	1	1	GNAL	18	guanine nucleotide binding protein (G protein), alpha activating activity polypeptide, olfactory type [Source:HGNC Symbol;Acc:4388]
ENSG00000141424	0.311328	7.22382	1.94725	0.0818967	0.231548	-5.33264	0	0.619592	7.22382	3.87534	0.0034476	0.023997	-2.29365	1	1	SLC39A6	18	solute carrier family 39 (zinc transporter), member 6 [Source:HGNC Symbol;Acc:18607]
ENSG00000141429	-0.0406038	9.40895	-0.289987	0.778109	0.887993	-7.03454	0	0.742641	9.40895	5.30384	0.000422098	0.00515322	-0.0935874	1	1	GALNT1	18	UDP-N-acetyl-alpha-D-galactosamine:polypeptide N-acetylgalactosaminyltransferase 1 (GalNAc-T1) [Source:HGNC Symbol;Acc:4123]
ENSG00000141447	0.74444	8.84116	4.4569	0.00141565	0.0139483	-1.24698	1	0.894426	8.84116	5.35485	0.000393719	0.00492275	-0.0202501	1	2	OSBPL1A	18	oxysterol binding protein-like 1A [Source:HGNC Symbol;Acc:16398]
ENSG00000141456	-0.608088	5.26511	-4.76325	0.000902961	0.0102827	-0.777897	1	-0.156411	5.26511	-1.22519	0.250253	0.483199	-6.45075	0	1		17	Uncharacterized protein [Source:UniProtKB/TrEMBL;Acc:C9JFV4]
ENSG00000141497	0.661859	5.55553	2.59689	0.0278745	0.110327	-4.29324	0	1.68821	5.55553	6.6239	7.81288e-05	0.0015463	1.68571	1	1	ZMYND15	17	zinc finger, MYND-type containing 15 [Source:HGNC Symbol;Acc:20997]
ENSG00000141504	-0.205922	9.25994	-1.42606	0.186137	0.396659	-6.0699	0	-0.731349	9.25994	-5.06477	0.00058777	0.00653709	-0.442246	1	1	SAT2	17	spermidine/spermine N1-acetyltransferase family member 2 [Source:HGNC Symbol;Acc:23160]
ENSG00000141505	-0.212122	5.30815	-0.764298	0.463404	0.681054	-6.7693	0	-1.20557	5.30815	-4.34381	0.00167696	0.0140748	-1.54251	1	1	ASGR1	17	asialoglycoprotein receptor 1 [Source:HGNC Symbol;Acc:742]
ENSG00000141526	0.401625	9.5614	2.73653	0.0220692	0.0933926	-4.06139	0	0.814973	9.5614	5.55293	0.00030153	0.00407992	0.260966	1	1	SLC16A3	17	solute carrier family 16, member 3 (monocarboxylic acid transporter 4) [Source:HGNC Symbol;Acc:10924]
ENSG00000141542	2.63101	6.02466	10.5854	1.54061e-06	0.000201044	5.82751	1	2.55015	6.02466	10.2601	2.02341e-06	0.000147911	5.50627	1	2	RAB40B	17	RAB40B, member RAS oncogene family [Source:HGNC Symbol;Acc:18284]
ENSG00000141560	-0.471813	5.78486	-2.89918	0.0168241	0.0771974	-3.78983	0	-0.774756	5.78486	-4.76069	0.000906303	0.00893972	-0.897524	1	1	FN3KRP	17	fructosamine 3 kinase related protein [Source:HGNC Symbol;Acc:25700]
ENSG00000141568	-0.669122	6.79415	-3.5473	0.00580875	0.0369833	-2.70862	1	-0.519765	6.79415	-2.7555	0.0213805	0.0925002	-4.15907	0	1	FOXK2	17	forkhead box K2 [Source:HGNC Symbol;Acc:6036]
ENSG00000141574	0.115617	4.93987	0.600245	0.562504	0.755499	-6.88635	0	0.871806	4.93987	4.52614	0.00127733	0.0115814	-1.25753	1	1	SECTM1	17	secreted and transmembrane 1 [Source:HGNC Symbol;Acc:10707]
ENSG00000141622	0.487863	4.29043	2.25894	0.0490075	0.16364	-4.84473	0	1.79304	4.29043	8.30228	1.23894e-05	0.000442692	3.62215	1	1	RNF165	18	ring finger protein 165 [Source:HGNC Symbol;Acc:31696]
ENSG00000141655	-2.2354	5.45596	-7.12885	4.34511e-05	0.00149796	2.39527	1	0.67047	5.45596	2.13818	0.0598675	0.191935	-5.1688	0	1	TNFRSF11A	18	tumor necrosis factor receptor superfamily, member 11a, NFKB activator [Source:HGNC Symbol;Acc:11908]
ENSG00000141682	2.17256	6.14134	4.38539	0.00157537	0.0149694	-1.35831	1	1.95325	6.14134	3.9427	0.00310253	0.0221554	-2.18409	1	2	PMAIP1	18	phorbol-12-myristate-13-acetate-induced protein 1 [Source:HGNC Symbol;Acc:9108]
ENSG00000141698	-0.483734	5.20168	-3.10687	0.0119208	0.0606085	-3.44219	0	-0.77272	5.20168	-4.96293	0.000678497	0.00725308	-0.593264	1	1	NT5C3L	17	5'-nucleotidase, cytosolic III-like [Source:HGNC Symbol;Acc:28300]
ENSG00000141965	-0.690219	6.77008	-5.16833	0.000508728	0.00704472	-0.178033	1	-0.194406	6.77008	-1.4557	0.177978	0.392669	-6.16579	0	1	FEM1A	19	fem-1 homolog a (C. elegans) [Source:HGNC Symbol;Acc:16934]
ENSG00000141994	-0.651628	5.91074	-5.23923	0.00046124	0.00665837	-0.075481	1	-0.581677	5.91074	-4.67681	0.00102371	0.0097998	-1.02541	0	1	DUS3L	19	dihydrouridine synthase 3-like (S. cerevisiae) [Source:HGNC Symbol;Acc:26920]
ENSG00000142002	-0.610276	6.62784	-5.37196	0.000384668	0.00599708	0.114544	1	-0.344933	6.62784	-3.03627	0.0133978	0.0654907	-3.6882	0	1	DPP9	19	dipeptidyl-peptidase 9 [Source:HGNC Symbol;Acc:18648]
ENSG00000142039	0.144783	5.98345	1.04742	0.321038	0.551486	-6.51077	0	0.641035	5.98345	4.6375	0.00108421	0.0102087	-1.08566	1	1	CCDC97	19	coiled-coil domain containing 97 [Source:HGNC Symbol;Acc:28289]
ENSG00000142089	-0.501841	8.21048	-1.21071	0.255508	0.480505	-6.33265	0	-1.79377	8.21048	-4.32752	0.00171863	0.0143494	-1.56818	1	1	IFITM3	11	interferon induced transmembrane protein 3 [Source:HGNC Symbol;Acc:5414]
ENSG00000142166	0.42439	9.36839	3.66547	0.00480636	0.0326252	-2.51386	0	1.1526	9.36839	9.95501	2.63053e-06	0.000170248	5.23535	1	1	IFNAR1	21	interferon (alpha, beta and omega) receptor 1 [Source:HGNC Symbol;Acc:5432]
ENSG00000142168	0.683115	11.1437	5.53821	0.000307512	0.00519409	0.348943	1	-0.471604	11.1437	-3.82343	0.00374097	0.0254851	-2.37839	0	1	SOD1	21	superoxide dismutase 1, soluble [Source:HGNC Symbol;Acc:11179]
ENSG00000142178	2.68562	4.91596	7.33133	3.46277e-05	0.00133813	2.63172	1	-0.092433	4.91596	-0.252328	0.806207	0.906784	-7.18182	0	1	SIK1	21	salt-inducible kinase 1 [Source:HGNC Symbol;Acc:11142]
ENSG00000142185	-0.762417	5.98471	-4.47712	0.00137367	0.013711	-1.21561	1	-0.709133	5.98471	-4.16422	0.00220274	0.0171479	-1.82738	1	2	TRPM2	21	transient receptor potential cation channel, subfamily M, member 2 [Source:HGNC Symbol;Acc:12339]
ENSG00000142188	0.590585	7.27702	3.69793	0.00456395	0.0315554	-2.46056	1	1.49291	7.27702	9.34783	4.52759e-06	0.000229203	4.67246	1	2	TMEM50B	21	transmembrane protein 50B [Source:HGNC Symbol;Acc:1280]
ENSG00000142197	-1.9164	6.62649	-10.9036	1.18818e-06	0.00017219	6.08864	1	-1.26286	6.62649	-7.18522	4.07716e-05	0.000987997	2.37111	1	2	DOPEY2	21	dopey family member 2 [Source:HGNC Symbol;Acc:1291]
ENSG00000142207	-0.642584	4.55884	-3.90377	0.00329726	0.0251579	-2.12495	1	0.0235054	4.55884	0.142798	0.889458	0.949657	-7.20552	0	1	URB1	21	URB1 ribosome biogenesis 1 homolog (S. cerevisiae) [Source:HGNC Symbol;Acc:17344]
ENSG00000142224	1.20759	3.90555	6.87862	5.78943e-05	0.00174944	2.09593	1	0.717777	3.90555	4.08857	0.00247424	0.0187711	-1.94857	1	2	IL19	1	interleukin 19 [Source:HGNC Symbol;Acc:5990]
ENSG00000142484	0.980193	4.08438	4.23775	0.00196894	0.0175385	-1.59029	1	0.562522	4.08438	2.432	0.0367254	0.137045	-4.69526	0	1	TM4SF5	17	transmembrane 4 L six family member 5 [Source:HGNC Symbol;Acc:11857]
ENSG00000142512	-0.271002	4.98472	-0.884879	0.398245	0.624801	-6.66752	0	1.7733	4.98472	5.79018	0.000220641	0.00326641	0.590399	1	1	SIGLEC10	19	sialic acid binding Ig-like lectin 10 [Source:HGNC Symbol;Acc:15620]
ENSG00000142541	-0.521477	11.1794	-4.11697	0.00236836	0.0198967	-1.78212	0	-0.694279	11.1794	-5.48122	0.000331895	0.00434952	0.1598	1	1	RPL13A	19	ribosomal protein L13a [Source:HGNC Symbol;Acc:10304]
ENSG00000142583	0.90184	4.20699	3.37946	0.00762255	0.0443482	-2.98703	1	-0.222699	4.20699	-0.834519	0.424646	0.655438	-6.84716	0	1	SLC2A5	1	solute carrier family 2 (facilitated glucose/fructose transporter), member 5 [Source:HGNC Symbol;Acc:11010]
ENSG00000142657	0.866465	10.6918	5.00653	0.000637945	0.00823347	-0.414802	1	0.998389	10.6918	5.7688	0.000226869	0.00331956	0.561032	1	2	PGD	1	phosphogluconate dehydrogenase [Source:HGNC Symbol;Acc:8891]
ENSG00000142676	-0.435239	12.4448	-4.47365	0.00138078	0.013743	-1.22099	0	-0.680083	12.4448	-6.9903	5.08885e-05	0.00114642	2.13764	1	1	RPL11	1	ribosomal protein L11 [Source:HGNC Symbol;Acc:10301]
ENSG00000142694	0.0484445	5.83208	0.194149	0.850182	0.927524	-7.05986	0	-1.28686	5.83208	-5.15729	0.00051658	0.00593032	-0.306342	1	1	FAM176B	1	family with sequence similarity 176, member B [Source:HGNC Symbol;Acc:25558]
ENSG00000142864	-0.825071	7.00087	-6.12245	0.000144307	0.00314239	1.14111	1	-0.862805	7.00087	-6.40245	0.000102043	0.00186555	1.40403	1	2	SERBP1	1	SERPINE1 mRNA binding protein 1 [Source:HGNC Symbol;Acc:17860]
ENSG00000142871	0.137977	3.46935	0.933201	0.374017	0.601109	-6.62319	0	0.738252	3.46935	4.99315	0.000650106	0.00702152	-0.548304	1	1	CYR61	1	cysteine-rich, angiogenic inducer, 61 [Source:HGNC Symbol;Acc:2654]
ENSG00000142875	-0.741062	4.96327	-3.18932	0.0104055	0.0549173	-3.30425	0	-1.70806	4.96327	-7.35102	3.38801e-05	0.000857858	2.566	1	1	PRKACB	1	protein kinase, cAMP-dependent, catalytic, beta [Source:HGNC Symbol;Acc:9381]
ENSG00000143110	-1.31078	9.30826	-4.96496	0.000676552	0.00853419	-0.476241	1	-0.392995	9.30826	-1.48858	0.169291	0.380407	-6.12254	0	1	C1orf162	1	chromosome 1 open reading frame 162 [Source:HGNC Symbol;Acc:28344]
ENSG00000143119	0.351376	10.9211	3.92201	0.00320451	0.0247063	-2.09543	0	0.766974	10.9211	8.56086	9.57182e-06	0.000378103	3.89209	1	1	CD53	1	CD53 molecule [Source:HGNC Symbol;Acc:1686]
ENSG00000143153	-1.29928	6.893	-6.49681	9.10012e-05	0.00233358	1.62346	1	-1.40247	6.893	-7.01282	4.95909e-05	0.00112438	2.16486	1	2	ATP1B1	1	ATPase, Na+/K+ transporting, beta 1 polypeptide [Source:HGNC Symbol;Acc:804]
ENSG00000143158	1.39992	7.65313	6.86339	5.89284e-05	0.00175889	2.07745	1	-0.0774579	7.65313	-0.379754	0.712549	0.855089	-7.13799	0	1	BRP44	1	brain protein 44 [Source:HGNC Symbol;Acc:24515]
ENSG00000143198	-0.428348	10.2268	-2.62596	0.0265511	0.106404	-4.2451	0	-0.739873	10.2268	-4.53576	0.00125928	0.0114532	-1.24262	1	1	MGST3	1	microsomal glutathione S-transferase 3 [Source:HGNC Symbol;Acc:7064]
ENSG00000143217	0.0193543	4.28017	0.134465	0.895864	0.951896	-7.0706	0	1.84453	4.28017	12.815	2.83346e-07	4.15975e-05	7.50713	1	1	PVRL4	1	poliovirus receptor-related 4 [Source:HGNC Symbol;Acc:19688]
ENSG00000143226	0.698701	10.387	4.33703	0.00169417	0.0157134	-1.43398	1	0.156469	10.387	0.971243	0.355704	0.594652	-6.72226	0	1	FCGR2A	1	Fc fragment of IgG, low affinity IIa, receptor (CD32) [Source:HGNC Symbol;Acc:3616]
ENSG00000143252	-0.605786	8.38845	-4.33613	0.00169648	0.0157134	-1.4354	1	-0.333053	8.38845	-2.38394	0.0397942	0.145296	-4.77382	0	1	SDHC	1	succinate dehydrogenase complex, subunit C, integral membrane protein, 15kDa [Source:HGNC Symbol;Acc:10682]
ENSG00000143314	-0.63531	8.36835	-6.7305	6.88524e-05	0.00193148	1.91493	1	-0.769264	8.36835	-8.14962	1.44709e-05	0.00049133	3.45947	1	2	MRPL24	1	mitochondrial ribosomal protein L24 [Source:HGNC Symbol;Acc:14037]
ENSG00000143315	-0.81162	5.53517	-5.38976	0.000375485	0.00591675	0.139841	1	0.0779487	5.53517	0.517637	0.616648	0.798026	-7.07138	0	1	PIGM	1	phosphatidylinositol glycan anchor biosynthesis, class M [Source:HGNC Symbol;Acc:18858]
ENSG00000143322	1.40923	7.39796	9.87856	2.81232e-06	0.000286385	5.21847	1	0.732924	7.39796	5.13771	0.000530833	0.00603334	-0.334997	1	2	ABL2	1	v-abl Abelson murine leukemia viral oncogene homolog 2 [Source:HGNC Symbol;Acc:77]
ENSG00000143333	4.30271	6.13182	12.662	3.15504e-07	8.68473e-05	7.40258	1	3.10223	6.13182	9.12923	5.54476e-06	0.000260485	4.46166	1	2	RGS16	1	regulator of G-protein signaling 16 [Source:HGNC Symbol;Acc:9997]
ENSG00000143353	-0.909406	8.15798	-7.17248	4.13611e-05	0.00146907	2.44665	1	-1.00705	8.15798	-7.94255	1.7929e-05	0.000558047	3.23477	1	2	LYPLAL1	1	lysophospholipase-like 1 [Source:HGNC Symbol;Acc:20440]
ENSG00000143382	0.0741131	3.98371	0.553023	0.593128	0.776137	-6.91523	0	0.596306	3.98371	4.44956	0.00143121	0.0125974	-1.37669	1	1	ADAMTSL4	1	ADAMTS-like 4 [Source:HGNC Symbol;Acc:19706]
ENSG00000143384	1.11431	9.10873	9.18218	5.27723e-06	0.000436474	4.57619	1	0.90788	9.10873	7.48111	2.93612e-05	0.000786103	2.71659	1	2	MCL1	1	myeloid cell leukemia sequence 1 (BCL2-related) [Source:HGNC Symbol;Acc:6943]
ENSG00000143387	-0.293938	9.96415	-0.793784	0.446855	0.668045	-6.74561	0	-1.5554	9.96415	-4.20038	0.00208429	0.0165029	-1.7697	1	1	CTSK	1	cathepsin K [Source:HGNC Symbol;Acc:2536]
ENSG00000143390	-0.697535	6.85427	-4.62067	0.00111128	0.0118292	-0.994587	1	-0.736819	6.85427	-4.88091	0.000762483	0.00787839	-0.71597	1	2	RFX5	1	regulatory factor X, 5 (influences HLA class II expression) [Source:HGNC Symbol;Acc:9986]
ENSG00000143466	-0.143216	6.6074	-1.24853	0.241973	0.465172	-6.28867	0	0.74464	6.6074	6.49166	9.15688e-05	0.00174564	1.51829	1	1	IKBKE	1	inhibitor of kappa light polypeptide gene enhancer in B-cells, kinase epsilon [Source:HGNC Symbol;Acc:14552]
ENSG00000143476	0.987125	3.40414	3.31202	0.00850891	0.0478919	-3.09936	1	0.00660162	3.40414	0.0221499	0.982791	0.993278	-7.21646	0	1	DTL	1	denticleless homolog (Drosophila) [Source:HGNC Symbol;Acc:30288]
ENSG00000143479	1.09832	3.84661	12.0662	4.84974e-07	0.000107308	6.98035	1	0.218674	3.84661	2.40237	0.0385888	0.142127	-4.74374	0	1	DYRK3	1	dual-specificity tyrosine-(Y)-phosphorylation regulated kinase 3 [Source:HGNC Symbol;Acc:3094]
ENSG00000143486	-0.465121	7.55098	-3.5112	0.00615682	0.0385201	-2.76834	0	-0.630528	7.55098	-4.75986	0.000907389	0.00894542	-0.898781	1	1	EIF2D	1	eukaryotic translation initiation factor 2D [Source:HGNC Symbol;Acc:6583]
ENSG00000143493	-1.19533	6.04499	-9.89361	2.77547e-06	0.000284276	5.23187	1	-0.86451	6.04499	-7.15547	4.21627e-05	0.00100648	2.33578	1	2	INTS7	1	integrator complex subunit 7 [Source:HGNC Symbol;Acc:24484]
ENSG00000143499	-0.277288	7.61224	-1.63428	0.135123	0.322819	-5.79026	0	-1.31759	7.61224	-7.76563	2.16049e-05	0.000633536	3.03898	1	1	SMYD2	1	SET and MYND domain containing 2 [Source:HGNC Symbol;Acc:20982]
ENSG00000143545	0.601813	10.8628	4.71536	0.000967847	0.010771	-0.85036	1	1.23531	10.8628	9.67898	3.3552e-06	0.000198351	4.98347	1	2	RAB13	1	RAB13, member RAS oncogene family [Source:HGNC Symbol;Acc:9762]
ENSG00000143546	0.905821	11.5488	2.17983	0.0558813	0.179235	-4.9709	0	2.78981	11.5488	6.71361	7.02384e-05	0.00143051	1.79797	1	1	S100A8	1	S100 calcium binding protein A8 [Source:HGNC Symbol;Acc:10498]
ENSG00000143554	-0.105741	4.54059	-0.795575	0.445863	0.667192	-6.74414	0	0.785473	4.54059	5.90975	0.000189056	0.00291136	0.753396	1	1	SLC27A3	1	solute carrier family 27 (fatty acid transporter), member 3 [Source:HGNC Symbol;Acc:10997]
ENSG00000143578	0.699668	5.84038	3.78387	0.00398214	0.0288697	-2.31994	1	1.54145	5.84038	8.33628	1.19719e-05	0.000434863	3.65804	1	2	CREB3L4	1	cAMP responsive element binding protein 3-like 4 [Source:HGNC Symbol;Acc:18854]
ENSG00000143641	1.46068	5.85018	9.05608	5.93905e-06	0.000475252	4.45508	1	1.50305	5.85018	9.3188	4.65008e-06	0.000232729	4.64471	1	2	GALNT2	1	UDP-N-acetyl-alpha-D-galactosamine:polypeptide N-acetylgalactosaminyltransferase 2 (GalNAc-T2) [Source:HGNC Symbol;Acc:4124]
ENSG00000143643	-0.766036	8.09378	-6.4105	0.000101047	0.00248972	1.51396	1	0.208511	8.09378	1.74491	0.113462	0.296082	-5.76647	0	1	TTC13	1	tetratricopeptide repeat domain 13 [Source:HGNC Symbol;Acc:26204]
ENSG00000143653	-0.39277	6.06011	-2.55979	0.0296595	0.114976	-4.35454	0	-0.858303	6.06011	-5.5938	0.000285577	0.00391214	0.318289	1	1	SCCPDH	1	saccharopine dehydrogenase (putative) [Source:HGNC Symbol;Acc:24275]
ENSG00000143771	0.716693	5.94153	3.79128	0.00393575	0.0286834	-2.30785	1	0.812932	5.94153	4.30038	0.00179054	0.0147727	-1.61102	1	2	CNIH4	1	cornichon homolog 4 (Drosophila) [Source:HGNC Symbol;Acc:25013]
ENSG00000143797	0.618158	5.03557	2.89536	0.0169315	0.077434	-3.79622	0	2.12121	5.03557	9.93544	2.67581e-06	0.000171417	5.2177	1	1	MBOAT2	2	membrane bound O-acyltransferase domain containing 2 [Source:HGNC Symbol;Acc:25193]
ENSG00000143799	-1.17146	6.5821	-8.02653	1.64283e-05	0.000838892	3.40608	1	-0.975112	6.5821	-6.6812	7.29849e-05	0.0014698	1.75753	1	2	PARP1	1	poly (ADP-ribose) polymerase 1 [Source:HGNC Symbol;Acc:270]
ENSG00000143819	0.701028	4.63829	2.60861	0.0273331	0.108693	-4.27383	0	-0.885794	4.63829	-3.29615	0.00873257	0.0476585	-3.25216	1	1	EPHX1	1	epoxide hydrolase 1, microsomal (xenobiotic) [Source:HGNC Symbol;Acc:3401]
ENSG00000143870	-0.224596	8.71064	-1.73479	0.115302	0.290763	-5.64764	0	-1.34629	8.71064	-10.3988	1.79969e-06	0.000134916	5.62699	1	1	PDIA6	2	protein disulfide isomerase family A, member 6 [Source:HGNC Symbol;Acc:30168]
[truncated: 1,655 more rows]

## Sheet: Jurkat
Table S8. The differentially expressed genes in Jurkat cells after 10µg/ml ZnO-1 exposure
Cut off: logFC>0.585 (=FC>1.5) and adjP-value <0.05
	6h							24h								Annotations
[truncated: 1,376 more rows]

## Sheet: Modified ZnO-ENs
Table S8. The differentially expressed genes in Jurkat cells after 10µg/ml, 25µg/ml, 50µg/ml or 100µg/ml ZnO-4 or 10µg/ml ZnO-2, ZnO-3, ZnO-5 or ZnO-9 exposure
[truncated: 833 more rows]
[truncated: 11 more columns]
