# Supplementary material
Source: publisher figshare collection journal article supplement (https://plos.figshare.com/articles/dataset/_/750110)
Supplement: Supplementary file 1 [file 1 › Table_S9.xls]

## Sheet: HMDM
Table S9. Overlap of our findings with HMDMs with Cousins et al. 2003 dataset.
	6h						24h
ID	logFC	AveExpr	t	P	adjP	B	logFC	AveExpr	t	P	adjP	B
ABL1	0.426408	9.76468	2.39672	0.0261909	0.186648	-4.25902	0.649228	9.76468	3.64912	0.00154869	0.0208782	-1.73944
APRT	-0.420851	9.09407	-2.65908	0.014881	0.128649	-3.73628	-0.771783	9.09407	-4.87639	8.6e-05	0.00194555	1.11775
ARHGEF18	-0.814471	11.0556	-4.03927	0.000617459	0.0117187	-0.678929	-0.584838	11.0556	-2.90043	0.00870692	0.08203	-3.40454
ARHGEF3	-0.737462	9.05264	-3.5961	0.0017538	0.0263432	-1.69659	0.313786	9.05264	1.53012	0.141298	0.50373	-5.91514
AZIN1	0.331269	10.5729	2.28434	0.033149	0.217495	-4.47379	0.835909	10.5729	5.76421	1.12e-05	0.000360764	3.15994
CD58	0.0693841	9.15184	0.356095	0.725414	0.926917	-6.81763	0.958573	9.15184	4.91961	7.77e-05	0.00178652	1.21839
CEBPD	0.0110071	11.4515	0.0419018	0.966983	0.992715	-6.88233	-1.03472	11.4515	-3.93897	0.000782527	0.0120129	-1.07064
CRLF3	-0.58762	9.28897	-6.83032	1.08e-06	8.29e-05	5.61535	0.0769154	9.28897	0.894042	0.381694	0.773273	-6.66073
DSTN	0.402279	9.63204	2.39756	0.0261443	0.186398	-4.25739	0.838652	9.63204	4.99831	6.47e-05	0.00153516	1.40144
EHD1	2.00657	10.3256	5.04891	5.75e-05	0.00181608	1.66243	1.84065	10.3256	4.63141	0.000152648	0.00313299	0.54591
EIF5	0.926365	10.0426	7.88552	1.24e-07	1.49e-05	7.76737	0.172525	10.0426	1.46859	0.157148	0.529058	-6.00164
FAM127A	0.516182	10.1853	5.45158	2.27e-05	0.000874015	2.58457	0.956553	10.1853	10.1025	2.11e-09	3.34e-07	11.7647
FOXO3	1.07291	11.4772	7.98529	1.02e-07	1.26e-05	7.96277	0.347128	11.4772	2.58355	0.0175464	0.137008	-4.06418
FRAT2	-0.732216	9.58216	-4.83887	9.38e-05	0.00264695	1.17719	-0.00948082	9.58216	-0.0626542	0.95065	0.989922	-7.06692
GGA2	-1.24138	10.0492	-9.1417	1.14e-08	2.21e-06	10.1262	-1.54635	10.0492	-11.3875	2.59e-10	6e-08	13.8473
GNB2L1	-0.59205	13.7791	-4.04394	0.000610681	0.0116461	-0.668119	-0.416519	13.7791	-2.84499	0.00985921	0.0898505	-3.52239
HLA-DPB1	-0.653331	8.47433	-3.52411	0.00207568	0.0297732	-1.85983	-1.33579	8.47433	-7.20536	4.92e-07	2.79e-05	6.29732
HLX	0.979014	8.51021	4.98141	6.73e-05	0.00205443	1.50676	0.712181	8.51021	3.62372	0.00164383	0.0218708	-1.79762
HNMT	-0.163949	8.54529	-0.90124	0.377945	0.760489	-6.4699	0.670796	8.54529	3.68743	0.00141545	0.0193927	-1.65157
IL13RA1	-0.674897	11.8272	-3.26729	0.003771	0.0472362	-2.43539	0.0779151	11.8272	0.3772	0.709908	0.925571	-6.99514
KCNAB1	-0.159024	7.48573	-0.617178	0.543923	0.855917	-6.68737	-0.855874	7.48573	-3.32168	0.00332517	0.0387569	-2.48183
NAB2	0.687602	8.10607	4.38391	0.0002735	0.00620518	0.120867	0.606327	8.10607	3.86573	0.000930159	0.0137975	-1.24039
NCF1	0.90491	10.4512	1.33338	0.197059	0.584377	-5.99874	2.31298	10.4512	3.40817	0.00272021	0.0330145	-2.28746
NCF1B	-0.0019861	7.48652	-0.0183922	0.985504	0.996593	-6.88307	0.614221	7.48652	5.68797	1.33e-05	0.000417278	2.98718
NCF1C	-0.972012	10.7634	-3.03163	0.00647225	0.0709794	-2.95162	1.27456	10.7634	3.97525	0.000718266	0.0112132	-0.986377
NFKBIA	0.423483	13.8008	3.85278	0.000958995	0.0165608	-1.10933	1.14239	13.8008	10.3933	1.29e-09	2.28e-07	12.253
PLSCR1	0.842072	8.30172	3.53601	0.00201876	0.0291558	-1.83292	1.1377	8.30172	4.77738	0.000108362	0.00236296	0.886874
PNMA2	1.59499	7.70103	9.09317	1.25e-08	2.38e-06	10.0392	3.71845	7.70103	21.1992	2.11e-15	5.14e-12	25.0093
PUS1	-1.2247	10.0611	-5.85839	9.03e-06	0.000419368	3.50158	-0.609674	10.0611	-2.91639	0.0083998	0.0798456	-3.37042
REPIN1	-0.970252	10.738	-4.54491	0.000187106	0.00457161	0.495086	-0.66277	10.738	-3.10459	0.00548064	0.0571387	-2.96285
SERINC1	0.292595	9.04142	2.63975	0.0155243	0.13259	-3.77573	0.612683	9.04142	5.52753	1.91e-05	0.000564004	2.6218
SESN1	-0.599488	8.90223	-3.24266	0.00399151	0.0491406	-2.48992	-0.618129	8.90223	-3.34349	0.0031612	0.037255	-2.43294
SIDT2	-0.873341	10.4846	-6.93727	8.62e-07	6.84e-05	5.84048	-0.673149	10.4846	-5.34707	2.89e-05	0.000792564	2.20805
SLC12A9	-1.12937	11.05	-5.92051	7.86e-06	0.000378905	3.64008	-0.480398	11.05	-2.5184	0.0202004	0.151665	-4.1952
SUMO3	-0.297565	12.2562	-3.17398	0.00467504	0.0554573	-2.64133	0.642304	12.2562	6.85114	1.03e-06	5.16e-05	5.55065
TNFAIP8	1.29498	10.0736	4.90727	8e-05	0.00233692	1.33548	0.69602	10.0736	2.63754	0.0155994	0.125845	-3.95433
TREM1	1.18082	7.48364	11.202	3.47e-10	1.6e-07	13.5446	0.654063	7.48364	6.20482	4.18e-06	0.000160134	4.14612
TSC22D1	2.15361	8.13139	9.50298	5.98e-09	1.38e-06	10.7647	0.702869	8.13139	3.10147	0.00551981	0.0574611	-2.96968
UBE2G2	-0.798383	10.2356	-4.92895	7.6e-05	0.00224176	1.38558	-0.976068	10.2356	-6.02591	6.21e-06	0.000220787	3.74829
ZCCHC11	-0.311488	8.41177	-2.3866	0.026757	0.189256	-4.2786	-0.608323	8.41177	-4.66092	0.000142417	0.00295378	0.614899
ZDHHC14	-0.374334	8.28202	-2.38115	0.0270668	0.190801	-4.28913	-0.659078	8.28202	-4.19241	0.000429957	0.00736237	-0.480498

## Sheet: Jurkat
Table S9. Overlap of our findings with Jurkat cells with Cousins et al. 2003 dataset.
	6h						24h
ID	logFC	AveExpr	t	P	adjP	B	logFC	AveExpr	t	P	adjP	B
CRLF3	-0.604004	9.6457	-5.46326	1.71e-05	0.00056728	2.68467	-0.409173	9.6457	-3.70101	0.00124266	0.0471941	-1.11681
DDX23	-0.606868	10.5163	-7.48026	1.74e-07	1.2e-05	7.28739	-0.078443	10.5163	-0.966889	0.344081	0.768481	-6.07176
DGCR14	-0.607539	8.06764	-11.4494	9.42e-11	2.28e-08	14.7955	-0.0944437	8.06764	-1.77984	0.0888825	0.464437	-5.027
DGCR2	0.237705	8.43619	1.69333	0.104468	0.473969	-5.6735	0.594554	8.43619	4.23542	0.000337819	0.0214386	0.130933
DYNC1LI2	0.913112	11.002	16.9705	3.79e-14	4.12e-11	22.3856	0.000124847	11.002	0.00232032	0.99817	0.999644	-6.54033
EIF5	0.921644	11.1788	6.88155	6.44e-07	3.46e-05	5.97213	-0.110065	11.1788	-0.82181	0.419979	0.815399	-6.19985
FOXO3	0.625899	10.0211	5.47304	1.67e-05	0.000556555	2.70802	0.206172	10.0211	1.80283	0.0850947	0.456615	-4.99031
HSPA4	0.980341	10.9931	10.2813	7.06e-10	1.18e-07	12.7963	-0.0297011	10.9931	-0.311491	0.758352	0.948039	-6.49077
MBNL2	0.646016	7.86397	4.98784	5.39e-05	0.00148233	1.54271	-0.137342	7.86397	-1.06041	0.300433	0.736104	-5.97911
OGT	0.748918	10.0642	3.28449	0.00337569	0.0441308	-2.52128	-0.037128	10.0642	-0.16283	0.872134	0.973702	-6.52677
PFKM	0.599227	7.45033	6.42271	1.81e-06	8.27e-05	4.93299	0.253468	7.45033	2.71675	0.0125771	0.174223	-3.29119
PUS1	-0.592151	9.93105	-5.39966	2e-05	0.000646354	2.53269	0.210555	9.93105	1.91999	0.0678818	0.412652	-4.79794
SLC7A1	0.937074	11.5889	10.6399	3.74e-10	7.17e-08	13.4274	-0.107059	11.5889	-1.21559	0.236991	0.680451	-5.80856
UBE2G2	-0.585397	11.202	-4.78148	8.89e-05	0.00224901	1.04393	-0.0431371	11.202	-0.352341	0.727926	0.939621	-6.47696
ZCCHC8	0.60249	9.84784	7.63506	1.25e-07	9.04e-06	7.61964	0.2937	9.84784	3.72191	0.00118129	0.045717	-1.06852
ZFP36	0.630528	9.32607	6.41176	1.86e-06	8.42e-05	4.90787	0.33891	9.32607	3.44633	0.00229519	0.0665544	-1.70001
ZNF512B	-0.754751	8.94242	-6.95885	5.42e-07	3.01e-05	6.1446	-0.0261359	8.94242	-0.240975	0.8118	0.959817	-6.51065
