# Supplementary material
Source: publisher figshare collection journal article supplement (https://plos.figshare.com/articles/dataset/_/750110)
Supplement: Supplementary file 1 [file 1 › Table_S10.xlsx]

## Sheet: Sheet1
Table S10. RT-PCR reagents
GENE	1) PROBE
	2) PRIMER 1
	3) PRIMER 2
EF1α	1) 5' -agcgccggctatgcccctg- 3'a
	2) 5' -ctgaaccatccaggccaaat- 3'
	3) 5' -gccgtgtggcaatccaat- 3'
MT1P3	1) Universal Probelibrary probe #18
	2) 5’- acctcctgcaagaagagctg -3’
	3) 5’- gcccctttgcagacacag -3’
MT1E	1) Universal Probelibrary probe #7
	2) 5’- aaaggggcatcggagaagt -3’
	3) 5’- aaatccaggttgtgcaggtt -3’
MT1F	1) Universal Probelibrary probe #14
	2) 5’- gactgatgccaggacaacc -3’
	3) 5’- tccaggtttgtacatgtctctctg -3’
MT1G	1) Universal Probelibrary probe #32
	2) 5’- aaaggggcatcggagaagt -3’
	3) 5’- aatcctagattttacgggtcactc -3’
MT1H	1) Universal Probelibrary probe #68
	2) 5’- tgggaactccagtctcacct -3’
	3) 5’- catttgcactttttgcacttg -3’
MT1X	1) Universal Probelibrary probe #15
	2) 5’- cttctccttgcctcgaaatg -3’
	3) 5’- acaggcacaggagccaac -3’
MT1A	1) Universal Probelibrary probe #68
	2) 5’- tgggatctccaacctcacc -3’
	3) 5’- atttgcaggagccagtgc -3’
aFAM (reporter), TAMRA (quencher) double labeled custom probe
